# Supplementary material for: An efficient and scalable pipeline for epitope tagging in mammalian stem cells using Cas9 ribonucleoprotein
Source: eLife. 2018 Apr 11;7:e35069. doi: 10.7554/eLife.35069 (PMC5947990; doi:10.7554/eLife.35069)
Supplement: Figure 1—source data 1. [file elife-35069-fig1-data1.xlsx]

## Sheet: Figure 1D
	Olig2-V5 knock-in efficiency				Sox2-V5 knock-in efficiency
	rCas9 IVT sgRNA		rCas9/cr-tracr dual-RNA		rCas9 IVT sgRNA		rCas9/cr-tracr dual-RNA
	Mean	Stdev	Mean	Stdev	Mean	Stdev	Mean	Stdev
NS cells	4.84982	0.556191	22.4457	0.120194	1.48759	0.171399	19.5363	2.76158
GNS cells	9.47496	1.40647	12.6811	0.559511	3.8972	0.198202	11.6258	2.06905
