# Supplementary material for: An efficient and scalable pipeline for epitope tagging in mammalian stem cells using Cas9 ribonucleoprotein
Source: eLife. 2018 Apr 11;7:e35069. doi: 10.7554/eLife.35069 (PMC5947990; doi:10.7554/eLife.35069)
Supplement: Figure 4—source data 1. [file elife-35069-fig4-data1.xlsx]

## Sheet: Figure 4C
	V5 knock-in efficiency (%)
	gRNA 1	gRNA2
Sox3	17.7	4.5
Sox5	3	0
Sox8	7.1	2.1
Sox9	8.5	0
Foxj3	7.2	0
Foxk1	7.4	0
Foxk2	14.5	0
