# Supplementary material for: An efficient and scalable pipeline for epitope tagging in mammalian stem cells using Cas9 ribonucleoprotein
Source: eLife. 2018 Apr 11;7:e35069. doi: 10.7554/eLife.35069 (PMC5947990; doi:10.7554/eLife.35069)
Supplement: Figure 6—source data 1. [file elife-35069-fig6-data1.xlsx]

## Sheet: Figure 6A
		V5 knock-in efficiency (%)
		Column 1	Column 2	Column 3	Column 4	Column 5	Column 6	Column 7	Column 8	Column 9	Column 10	Column 11	Column 12
	Row A	11.09	17.82	1.14	6.98	1.14	0.99	0.54	0.57	0.9	1.89	0.62	8.87
	Row B	2.1	1.96	28.99	1.08	1.74	6.29	1.41	3.96	1.03	1.01	10.07	0.45
	Row C	1.45	19.01	1.68	21.53	0.58	0.96	1.27	0.97	1.19	0.97	1.96	0.81
	Row D	1.69	14.79	1.9	1.09	10.45	0.87	14.92	1.1	1.63	0.89	0.67	3.74
	Row E	16.6	2.01	8.19	1.09	1.4	2.31	0.77	14.7	1.06	0.74	0.77	1.12
	Row F	1.6	1.12	1.57	0.83	0.59	1.2	1.59	1.3	0.63	0.68	1.21	0.55
	Row G	1.29	11.86	1.17	1.29	5.43	8.2	0.84	1.35	1.18	0.87	1.03	21.83
	Row H	10.79	2.13	4.44	1.32	1.57	23.64	0.89	0.9	0.93	0.74	11.98	7.36

## Sheet: Figure 6C
		V5 knock-in efficiency (%)
		Column 1	Column 2	Column 3	Column 4	Column 5	Column 6	Column 7	Column 8	Column 9	Column 10	Column 11	Column 12
	Row A	20.75	2.31	0.94	0.85	2.33	0.78	1.01	2.53	0.78	5.02	2.1	2.52
	Row B	3.66	5.94	13.93	14.81	1.29	1.93	12.41	0.95	0.81	1.79	0.68	0.83
	Row C	18.66	1.39	10.65	8.29	7.3	3.08	2.48	15.76	1.47	1.27	3.12	1.08
	Row D	2.24	2.69	2.33	12.06	2.22	7.16	3.02	3.29	1.1	3.91	7.46	4.54
	Row E	11.34	5.22	4.76	2.76	1.53	1.41	1.22	5.3	0.78	1.77	1.3	0.96
	Row F	5.23	13.11	5.45	2.11	2.47	8.38	4.57	1.84	0.93	4.75	0.38	0.92
	Row G	4.76	38.74	2.23	2.37	14.95	2.42	1.07	7.76	33.59	32.77	0.89	0.73
	Row H	15.48	3.12	1.73	0.45	8.83	4.94	3.14	0.64	7.65	0.69	0.67	0.63

## Sheet: Figure 6E
	Gene	V5 Knock-in efficiency (%)		Gene	V5 Knock-in efficiency (%)
	Ybx1	38.7363		Pbrm1	14.8072
	Zc3h18	33.5915		Ep400	14.7855
	Zc3h4	32.7744		Pax6	13.9336
	Cbfb	28.9917		Tead1	13.1082
	Ncor2	23.6407		Peg3	12.413
	Mta2	21.8269		Sall2	12.0639
	Dek	21.5325		Nfia	11.9786
	Ctcf	19.013		Maz	11.864
	Pogz	18.6601		Sp1	11.3384
	Adnp	17.8218		Pou3f1	10.6541
	Gmeb1	16.5953		Creb1	10.0728
	Rbm5	15.7597		Zfp148	8.82719
	Zeb1	15.4806		Trps1	8.37529
	Yeats4	14.948		Pou3f2	8.29081
	Ezh2	14.9239		Mef2a	8.2026
