# Supplementary material for: An efficient and scalable pipeline for epitope tagging in mammalian stem cells using Cas9 ribonucleoprotein
Source: eLife. 2018 Apr 11;7:e35069. doi: 10.7554/eLife.35069 (PMC5947990; doi:10.7554/eLife.35069)
Supplement: Figure 7—source data 1. [file elife-35069-fig7-data1.xlsx]

## Sheet: Figure 7A RIME Olig2-V5
LFQ intensity Control_2	LFQ intensity Control_3	LFQ intensity Control_4	LFQ intensity Olig2V5_1	LFQ intensity Olig2V5_3	LFQ intensity Olig2V5_4	ttest	ratio	Peptides	Razor + unique peptides	Unique peptides	Sequence coverage [%]	Unique + razor sequence coverage [%]	Unique sequence coverage [%]	Mol. weight [kDa]	Q-value	Score	Intensity	MS/MS count	-Log Student's t-test p-value Control_Olig2V5	Student's t-test q-value Control_Olig2V5	Student's t-test Difference Control_Olig2V5	Student's t-test Test statistic Control_Olig2V5	Protein IDs	Majority protein IDs	Protein names	Gene names	Fasta headers
18.7325	18.2679	19.9	29.7386	30.0856	29.7478	4.58456	11.0153	12	12	11	35	35	32.5	32.406	0	124.16	4299000000	62	6.23061	0	-10.607	-4.16979	Q9EQW6;Q6PFG8	Q9EQW6	Oligodendrocyte transcription factor 2	Olig2
17.6464	17.8061	19.4247	22.9253	23.2347	23.6421	2.92424	5.42859	6	5	5	29.2	26.2	26.2	27.141	0	14.505	49270000	9	3.9419	0	-4.80657	-1.83906	Q9JKN5	Q9JKN5	Oligodendrocyte transcription factor 1	Olig1
18.6404	17.9194	19.3479	21.4477	21.7816	22.0799	2.64724	3.14123	1	1	1	17.7	17.7	17.7	17.27	0	14.631	61143000	2	2.20062	0.0186667	-3.73866	-1.22029	Q9CQH7	Q9CQH7	Transcription factor BTF3 homolog 4	Btf3l4
18.4077	16.6431	18.894	22.2118	18.3835	21.4649	0.932173	3.05719	1	1	1	2.7	2.7	2.7	53.693	0	3.5576	13910000	3	1.55057	0.138	-2.72735	-0.864256	Q8BGQ6	Q8BGQ6	EF-hand calcium-binding domain-containing protein 14	Efcab14
19.726	19.8216	21.6558	24.1257	23.8263	23.0692	2.01827	4.00472	19	5	3	29.6	10.4	6.2	48.105	0	6.1921	65004000	10	2.09763	0.119	-2.59391	-0.932747	CON__Q04695;CON__P19001;P19001;CON__Q99PS0;Q99PS0	CON__Q04695		Krt23
22.5222	18.4138	17.9604	22.9092	22.5363	22.7839	1.003	4.37002	1	1	1	13.6	13.6	13.6	13.608	0	4.8578	52896000	6	1.1586	0.5275	-2.42642	-0.709069	Q9CQA6	Q9CQA6	Coiled-coil-helix-coiled-coil-helix domain-containing protein 1	Chchd1
17.7541	18.0727	19.7638	21.4093	21.054	20.5948	1.69393	2.98129	2	2	2	13.7	13.7	13.7	17.6	0	2.5565	9408900	2	2.38568	0.1456	-2.26695	-0.876899	Q9D3D9	Q9D3D9	ATP synthase subunit delta, mitochondrial	Atp5d
17.9565	18.0451	18.3024	21.6247	17.4001	21.746	0.684328	3.57964	2	2	2	9.7	9.7	9.7	53.516	0	3.5251	13248000	3	1.12383	0.820444	-2.16306	-0.653042	P26369	P26369	Splicing factor U2AF 65 kDa subunit	U2af2
18.6562	18.2683	23.0713	22.9342	22.973	23.2246	0.921938	4.31683	9	9	9	8.2	8.2	8.2	134.24	0	17.422	76286000	11	0.943826	0.812286	-2.14409	-0.596308	Q8CG48	Q8CG48	Structural maintenance of chromosomes protein 2	Smc2
20.9215	17.4092	20.5133	23.3445	22.0619	21.3543	0.987675	1.54865	1	1	1	29.2	29.2	29.2	12.746	0	6.2623	32956000	1	1.19106	0.8592	-1.99973	-0.637683	P48024	P48024	Eukaryotic translation initiation factor 1	Eif1
18.6374	17.4303	22.4752	22.4536	21.9906	22.1986	0.818958	3.56119	4	4	4	18.9	18.9	18.9	25.345	0	9.4823	46983000	6	0.901688	0.692182	-1.97008	-0.554932	Q9D8X2	Q9D8X2	Coiled-coil domain-containing protein 124	Ccdc124
17.7964	22.0914	22.19	23.6159	23.4773	22.9702	0.845636	1.38587	2	2	2	6.1	6.1	6.1	35.31	0	5.7882	56595000	6	1.11698	0.873	-1.93917	-0.608905	Q9EPB5	Q9EPB5	Serine hydrolase-like protein	Serhl
18.1589	21.6358	23.3609	23.6243	23.7392	23.4462	0.766482	1.98851	5	5	5	20.2	20.2	20.2	34.106	0	14.811	95258000	12	0.964066	0.806444	-1.89957	-0.56233	P11440;P49615;Q80YP0;P30285;Q64261;P97377;Q99J95;Q3V3A1;Q04899;O35495;Q04735;Q8K0D0;Q14AX6;Q69ZA1	P11440	Cyclin-dependent kinase 1	Cdk1
17.8378	19.878	21.6368	22.3341	21.7222	23.345	1.05462	2.45613	4	4	3	7.5	7.5	6.2	68.988	0	19.158	46861000	9	1.01007	0.8255	-1.89862	-0.574776	P35922;Q9WVR4	P35922	Fragile X mental retardation protein 1 homolog	Fmr1
19.3108	20.9411	18.3493	22.0915	22.3489	22.0633	1.5871	2.78075	2	2	2	4.4	4.4	4.4	53.706	0	4.6552	33628000	4	1.17166	0.808923	-1.87526	-0.607837	P28658	P28658	Ataxin-10	Atxn10
18.4206	18.1546	22.2475	21.8835	22.0079	22.3691	0.867121	3.58732	5	5	5	5	5	5	146.89	0	16.555	36314000	3	0.987436	0.775158	-1.85368	-0.560548	Q8CG47	Q8CG47	Structural maintenance of chromosomes protein 4	Smc4
18.2153	18.4364	21.797	22.0404	21.8433	22.2342	1.03105	3.60403	4	4	4	9.8	9.8	9.8	64.403	0	17.885	37224000	4	0.977218	0.721524	-1.8425	-0.555778	Q8BJW6	Q8BJW6	Eukaryotic translation initiation factor 2A;Eukaryotic translation initiation factor 2A, N-terminally processed	Eif2a
17.545	18.8371	22.3114	22.1015	22.889	22.1792	0.912834	3.34205	3	3	3	7.4	7.4	7.4	80.425	0	6.3785	39440000	2	0.9159	0.707833	-1.82971	-0.536212	Q99PU5	Q99PU5	Long-chain-fatty-acid--CoA ligase ACSBG1	Acsbg1
18.4942	19.8406	18.0103	21.2756	21.3248	21.6143	2.03232	2.83057	1	1	1	9.4	9.4	9.4	10.99	0.0024038	1.8257	21107000	4	1.14371	0.785333	-1.82409	-0.591318	P62627	P62627	Dynein light chain roadblock-type 1	Dynlrb1
18.5492	19.0572	18.5697	21.7205	21.2852	21.4211	3.70715	2.85144	3	3	3	0.9	0.9	0.9	426.26	0	7.4519	22107000	4	1.09085	0.809176	-1.77882	-0.570759	Q8C8R3;G5E8K5	Q8C8R3	Ankyrin-2	Ank2
19.3646	20.1845	17.5751	20.9875	21.4765	22.3271	1.38031	2.11193	1	1	1	2.4	2.4	2.4	54.218	0	3.2415	26304000	1	1.01229	0.682609	-1.76062	-0.549269	Q6PDL0	Q6PDL0	Cytoplasmic dynein 1 light intermediate chain 2	Dync1li2
22.2799	22.2264	23.6215	24.7319	24.4566	23.8599	1.45383	2.17677	3	3	3	12.7	12.7	12.7	29.622	0	14.73	133340000	13	2.50762	0.573714	-1.74042	-0.718468	P97822	P97822	Acidic leucine-rich nuclear phosphoprotein 32 family member E	Anp32e
17.5234	18.2279	21.6429	21.0542	21.2775	20.7044	0.664373	2.82631	1	1	1	6.3	6.3	6.3	21.656	0.0057208	1.447	12480000	1	1.16006	0.7502	-1.65479	-0.557471	P32883;P08556	P32883;P08556	GTPase KRas;GTPase KRas, N-terminally processed;GTPase NRas	Kras;Nras	;
18.7896	19.2598	20.4306	21.7172	21.7851	21.0626	1.70358	2.45738	1	1	1	2.1	2.1	2.1	48.297	0.0024067	1.8368	17545000	1	1.70104	0.930909	-1.60374	-0.613731	Q9D964	Q9D964	Glycine amidinotransferase, mitochondrial	Gatm
18.5593	21.8606	22.9921	23.5176	23.2477	23.571	0.799916	1.65701	20	2	2	47.9	3.6	3.6	49.906	0	11.844	96343000	7	0.861287	1	-1.59916	-0.479896	Q7TMM9	Q7TMM9	Tubulin beta-2A chain	Tubb2a
18.1257	20.6283	19.8975	21.234	22.3971	20.7979	1.02384	1.33646	7	7	7	3.2	3.2	3.2	270.25	0	17.091	46731000	9	0.825151	1	-1.59018	-0.467789	P14873	P14873	Microtubule-associated protein 1B;MAP1B heavy chain;MAP1 light chain LC1	Map1b
21.0638	22.2298	22.1808	24.0833	23.8643	24.1669	2.31748	1.90255	11	11	11	20.7	20.7	20.7	81.21	0	48.697	134710000	20	1.08774	0.86256	-1.49831	-0.509006	Q61881	Q61881	DNA replication licensing factor MCM7	Mcm7
20.4791	16.6822	21.0595	21.3287	22.0721	21.7559	0.765863	1.27677	4	4	2	2	2	1.3	269.82	0	10.838	25766000	4	0.829438	1	-1.49665	-0.452398	P26039	P26039	Talin-1	Tln1
18.238	18.7435	21.0188	22.5164	21.2222	21.1012	1.10782	2.47873	8	4	4	5	3	3	228.58	0	10.693	33455000	4	0.809657	1	-1.45556	-0.439369	Q6URW6	Q6URW6	Myosin-14	Myh14
18.0486	20.8796	21.4767	22.0284	22.5204	21.5636	0.804999	1.14887	3	3	3	17.5	17.5	17.5	20.348	0	6.3282	29536000	8	1.02572	1	-1.43273	-0.483074	Q8VE22	Q8VE22	28S ribosomal protein S23, mitochondrial	Mrps23
20.2587	19.2472	22.9101	23.3142	22.902	22.4977	0.874687	2.64332	10	10	10	6.2	6.2	6.2	274.22	0	44.329	97507000	13	0.716474	1	-1.3378	-0.39055	Q62261	Q62261	Spectrin beta chain, non-erythrocytic 1	Sptbn1
20.4021	19.0442	21.919	21.894	22.5806	22.6109	1.03813	2.17851	4	4	4	5.7	5.7	5.7	109.55	0	31.056	44896000	3	0.918877	1	-1.33421	-0.440952	Q61768;P28738;P33175	Q61768	Kinesin-1 heavy chain	Kif5b
19.1387	21.6456	22.8583	23.1393	22.9912	23.1056	0.784734	1.46005	8	8	8	8.4	8.4	8.4	106.91	0	17.313	77196000	16	0.846675	1	-1.33313	-0.425237	Q8BGQ7	Q8BGQ7	Alanine--tRNA ligase, cytoplasmic	Aars
16.7749	20.4021	20.2924	21.4769	21.1568	21.9356	0.911213	1.18445	1	1	1	14.9	14.9	14.9	7.7662	0.0023952	1.7857	21364000	2	0.774803	1	-1.31786	-0.404243	P03930	P03930	ATP synthase protein 8	Mtatp8
17.8329	21.3176	22.2699	22.4459	22.3062	22.7769	0.682862	1.12831	4	4	4	4.3	4.3	4.3	114.86	0	16.545	47050000	9	0.765308	1	-1.29647	-0.397637	O55143;Q8R429	O55143	Sarcoplasmic/endoplasmic reticulum calcium ATPase 2	Atp2a2
18.7655	18.2015	21.6356	21.6557	21.1392	21.2546	0.778834	2.48911	3	3	3	6.1	6.1	6.1	58.727	0	7.8268	27190000	6	0.780133	1	-1.28338	-0.399079	Q61074	Q61074	Protein phosphatase 1G	Ppm1g
24.001	23.348	23.9141	24.9907	26.5196	23.2092	0.516879	1.0766	2	2	2	0.9	0.9	0.9	353.93	0.002401	1.8056	191070000	4	0.820356	1	-1.27871	-0.40804	E9PWQ3	E9PWQ3		Col6a3
18.5355	18.5096	18.7799	18.5807	20.412	21.7344	0.82444	1.87658	1	1	1	9.4	9.4	9.4	15.103	0	2.2568	7878500	2	1.09442	1	-1.27329	-0.455353	Q9CPY1	Q9CPY1	39S ribosomal protein L51, mitochondrial	Mrpl51
20.5212	18.0814	21.6012	21.8464	21.9007	22.1679	0.845205	1.37945	4	4	4	5	5	5	88.79	0	5.7452	31524000	5	0.849944	1	-1.25397	-0.409471	Q91W50	Q91W50	Cold shock domain-containing protein E1	Csde1
18.0429	19.9661	21.6686	22.5104	21.5451	20.8886	0.696664	1.57903	4	4	4	5.5	5.5	5.5	134.19	0	16.289	29433000	5	0.806409	1	-1.24553	-0.398018	Q8BMJ2	Q8BMJ2	Leucine--tRNA ligase, cytoplasmic	Lars
20.9145	18.4057	21.7997	22.0298	22.1905	22.3568	0.825814	1.27602	6	6	5	5.7	5.7	4.9	101.2	0	8.7337	42064000	11	0.810348	1	-1.23372	-0.396501	Q922D8	Q922D8	C-1-tetrahydrofolate synthase, cytoplasmic;Methylenetetrahydrofolate dehydrogenase;Methenyltetrahydrofolate cyclohydrolase;Formyltetrahydrofolate synthetase;C-1-tetrahydrofolate synthase, cytoplasmic, N-terminally processed	Mthfd1
18.9341	19.1455	19.9883	20.8678	21.2772	21.6456	2.08158	2.13177	2	2	2	4.3	4.3	4.3	56.55	0.0024155	1.8576	17773000	2	1.02638	1	-1.22802	-0.434355	P62814	P62814	V-type proton ATPase subunit B, brain isoform	Atp6v1b2
18.0238	18.7875	20.8205	20.876	20.954	21.2988	1.01828	2.16651	3	3	3	7.6	7.6	7.6	44.729	0	3.3012	19464000	5	0.819813	1	-1.22006	-0.395775	Q9CZ30	Q9CZ30	Obg-like ATPase 1	Ola1
18.941	19.9627	20.5598	21.5233	21.3692	21.8868	1.62956	1.56062	3	3	3	1.7	1.7	1.7	181.43	0	5.0284	24995000	10	0.990227	1	-1.21191	-0.424997	Q3TKT4;Q6DIC0	Q3TKT4	Transcription activator BRG1	Smarca4
19.6799	17.7099	19.934	20.2232	18.3891	21.5633	0.339391	0.54328	1	1	1	3.8	3.8	3.8	49.548	0.0068027	1.4257	11665000	1	0.823995	1	-1.20097	-0.392632	O88685	O88685	26S protease regulatory subunit 6A	Psmc3
19.4528	18.3924	20.6021	21.006	21.4368	20.4956	1.01287	1.55324	3	3	3	17.9	17.9	17.9	22.165	0	3.4962	14745000	6	1.10449	1	-1.195	-0.436212	Q9DBP5	Q9DBP5	UMP-CMP kinase	Cmpk1
21.0527	22.0663	22.9065	23.9921	23.765	23.3131	1.37294	1.69872	6	6	6	22.1	22.1	22.1	33.296	0	18.681	94593000	15	1.10521	1	-1.16875	-0.429257	O35129	O35129	Prohibitin-2	Phb2
17.5961	18.9521	20.3228	21.6177	20.8441	20.7815	1.20023	1.892	2	2	2	10.4	10.4	10.4	31.013	0	4.7369	8214300	2	0.895323	1	-1.16517	-0.398368	O35658	O35658	Complement component 1 Q subcomponent-binding protein, mitochondrial	C1qbp
19.5587	17.5253	20.9295	20.5684	21.2581	21.5399	0.800498	1.69931	3	3	3	13.1	13.1	13.1	26.51	0	2.3676	35781000	4	0.637843	1	-1.16044	-0.334242	Q9CXW3	Q9CXW3	Calcyclin-binding protein	Cacybp
17.0621	19.2538	20.3315	21.0426	21.2877	20.0446	0.85811	1.78885	1	1	1	1.7	1.7	1.7	56.537	0.0023364	1.5577	12964000	2	0.812766	1	-1.14689	-0.378602	P47738	P47738	Aldehyde dehydrogenase, mitochondrial	Aldh2
20.635	17.9139	21.6738	21.8472	21.5922	22.1501	0.722706	1.21218	2	2	2	8.9	8.9	8.9	30.059	0	12.221	35952000	4	0.724416	1	-1.1464	-0.357968	Q91WN1	Q91WN1	DnaJ homolog subfamily C member 9	Dnajc9
18.0952	18.2304	19.7343	20.1969	20.2192	20.5303	1.41462	1.98877	1	1	1	3.4	3.4	3.4	41.275	0.0024752	2.0989	6355600	0	1.15765	1	-1.14157	-0.427614	P63085	P63085	Mitogen-activated protein kinase 1	Mapk1
17.7141	20.0904	21.5462	21.7309	20.6475	21.3866	0.562221	1.29622	2	2	2	3.7	3.7	3.7	69.036	0	12.181	27075000	5	0.729135	1	-1.1395	-0.357838	Q8VEE4	Q8VEE4	Replication protein A 70 kDa DNA-binding subunit;Replication protein A 70 kDa DNA-binding subunit, N-terminally processed	Rpa1
20.6853	20.3755	21.4916	22.4845	22.3101	22.3998	1.99845	1.71453	3	3	3	25	25	25	10.344	0	6.6523	35633000	8	1.43805	1	-1.13046	-0.448477	P56135	P56135	ATP synthase subunit f, mitochondrial	Atp5j2
17.1357	17.3619	18.9263	20.1735	19.9865	19.9875	1.77674	2.62557	1	1	1	7	7	7	23.897	0.0057078	1.4423	11005000	1	0.680087	1	-1.10431	-0.337769	Q91V41	Q91V41	Ras-related protein Rab-14	Rab14
19.0224	19.0044	19.5976	20.7339	20.6081	19.8454	1.60468	1.58567	3	3	3	6.6	6.6	6.6	70.793	0	3.8987	10247000	4	1.30246	1	-1.10088	-0.429051	Q60967	Q60967	Bifunctional 3-phosphoadenosine 5-phosphosulfate synthase 1;Sulfate adenylyltransferase;Adenylyl-sulfate kinase	Papss1
21.757	23.4156	25.0772	24.7858	24.7625	25.115	0.694345	1.37018	19	3	2	44.9	9.4	6.1	49.83	0	38.814	273310000	26	0.823198	1	-1.09758	-0.369702	P68372;Q9D6F9;CON__ENSEMBL:ENSBTAP00000025008;A2AQ07	P68372;Q9D6F9	Tubulin beta-4B chain;Tubulin beta-4A chain	Tubb4b;Tubb4a	;
18.0869	20.6758	22.028	21.4575	22.0737	22.1058	0.6175	1.39784	3	3	3	5	5	5	71.543	0	6.5772	32721000	10	0.748946	1	-1.09669	-0.35398	Q7M6Y3;Q61548	Q7M6Y3	Phosphatidylinositol-binding clathrin assembly protein	Picalm
18.5808	21.0078	21.1863	21.5255	21.6769	21.8436	0.776178	0.6691	4	4	4	2.6	2.6	2.6	225.65	0	9.0575	28100000	4	0.885816	1	-1.09613	-0.380384	Q6P5D8	Q6P5D8	Structural maintenance of chromosomes flexible hinge domain-containing protein 1	Smchd1
20.751	18.651	22.2732	21.964	22.4276	22.7727	0.784563	1.67658	4	4	4	3.3	3.3	3.3	243.24	0	27.915	50332000	4	0.709092	1	-1.09199	-0.343298	B2RQC6	B2RQC6	CAD protein;Glutamine-dependent carbamoyl-phosphate synthase;Aspartate carbamoyltransferase;Dihydroorotase	Cad
19.3818	17.2761	19.9286	20.0313	20.1771	20.8633	0.815928	0.79529	2	2	2	9.5	9.5	9.5	45.133	0	9.6827	11226000	4	0.830437	1	-1.08897	-0.369088	Q60737	Q60737	Casein kinase II subunit alpha	Csnk2a1
18.6151	18.4697	21.1533	19.0839	21.7217	21.4856	0.484803	2.87048	1	1	1	10.6	10.6	10.6	18.621	0	8.0019	16075000	4	0.751511	1	-1.07205	-0.349378	G3X9L6;Q9DCX2	G3X9L6;Q9DCX2	ATP synthase subunit d, mitochondrial	Gm10250;Atp5h	;
18.6348	23.2654	23.189	23.4166	23.6676	23.492	0.52477	0.30304	4	4	4	26.7	26.7	26.7	26.94	0	35.167	99849000	15	0.634298	1	-1.05204	-0.314398	O08583;Q9JJW6	O08583;Q9JJW6	THO complex subunit 4;Aly/REF export factor 2	Alyref;Alyref2	;
21.6168	17.6158	20.8061	21.3287	21.5904	21.8809	0.5735	0.78426	3	3	3	7.5	7.5	7.5	49.939	0	5.6524	23095000	5	0.753109	1	-1.04362	-0.343624	Q9D0G0	Q9D0G0	28S ribosomal protein S30, mitochondrial	Mrps30
17.3866	20.0102	21.399	20.9685	21.2315	20.915	0.538183	0.95828	1	1	1	3.5	3.5	3.5	22.848	0.0024301	1.8901	19197000	3	0.724593	1	-1.0307	-0.334557	Q8BXC6	Q8BXC6	COMM domain-containing protein 2	Commd2
16.7346	19.7813	20.7355	20.432	21.0329	20.6448	0.593763	0.86352	3	3	3	1.4	1.4	1.4	244.54	0	2.9129	16640000	4	0.662117	1	-1.01869	-0.316441	Q6P4T2	Q6P4T2	U5 small nuclear ribonucleoprotein 200 kDa helicase	Snrnp200
21.3059	20.8247	22.276	23.1229	22.9962	23.0794	1.692	1.77354	5	5	5	6.6	6.6	6.6	112.26	0	9.4791	59830000	7	1.03209	1	-0.999789	-0.374574	Q9ESZ8	Q9ESZ8	General transcription factor II-I	Gtf2i
20.4815	19.1978	20	21.1211	21.2726	21.8751	1.59616	1.27256	3	3	3	5.6	5.6	5.6	63.691	0	5.0301	21708000	5	0.92731	1	-0.997004	-0.361494	Q8BMK4	Q8BMK4	Cytoskeleton-associated protein 4	Ckap4
19.1655	18.319	20.3007	20.5787	20.6749	21.3307	1.21087	1.50936	1	1	1	0.8	0.8	0.8	140.6	0	2.4603	13058000	2	0.897479	1	-0.989126	-0.355444	P97820	P97820	Mitogen-activated protein kinase kinase kinase kinase 4	Map4k4
19.9897	21.982	21.8854	22.9386	22.7732	22.7067	1.09605	0.88777	7	7	7	3.6	3.6	3.6	183.19	0	10.307	59539000	15	0.836015	1	-0.975763	-0.343056	P13864	P13864	DNA (cytosine-5)-methyltransferase 1	Dnmt1
18.5491	21.0634	21.7324	22.0975	22.4394	21.6744	0.749527	1.03413	3	3	3	3.2	3.2	3.2	110.45	0	5.7261	35898000	7	0.719323	1	-0.966606	-0.319633	Q9ERK4	Q9ERK4	Exportin-2	Cse1l
19.7962	19.4211	22.1981	22.3032	22.3771	21.3703	0.766112	2.50708	33	2	2	49.8	4.6	4.6	59.998	0	6.9205	31414000	2	0.778617	1	-0.949153	-0.327118	CON__P04259	CON__P04259
21.725	18.7071	21.8173	23.0568	22.5119	21.6002	0.672662	0.78687	1	1	1	8.1	8.1	8.1	26.221	0	2.5585	35079000	7	0.748547	1	-0.944481	-0.320549	Q792Z1	Q792Z1		Try10
20.7519	21.2998	22.718	23.3391	22.6194	22.9294	1.03689	1.62954	8	8	8	19.1	19.1	19.1	60.718	0	21.658	70375000	15	0.837919	1	-0.943242	-0.335219	P14685	P14685	26S proteasome non-ATPase regulatory subunit 3	Psmd3
19.3343	17.6076	18.307	19.8954	19.6064	19.7155	1.22221	1.40843	1	1	1	0.7	0.7	0.7	210.43	0	2.2145	7121700	2	0.854699	1	-0.925315	-0.333036	Q61191	Q61191	Host cell factor 1;HCF N-terminal chain 1;HCF N-terminal chain 2;HCF N-terminal chain 3;HCF N-terminal chain 4;HCF N-terminal chain 5;HCF N-terminal chain 6;HCF C-terminal chain 1;HCF C-terminal chain 2;HCF C-terminal chain 3;HCF C-terminal chain 4;HCF C-terminal chain 5;HCF C-terminal chain 6	Hcfc1
24.079	24.3435	25.0056	26.0365	25.8329	25.2037	1.50822	1.48945	7	7	7	39	39	39	23.363	0	32.198	356760000	32	1.45517	1	-0.923108	-0.381507	Q9DB20	Q9DB20	ATP synthase subunit O, mitochondrial	Atp5o
19.3694	24.9074	25.38	24.9783	24.7471	24.5569	0.328044	-0.16029	1	1	1	1.3	1.3	1.3	62.832	0.0067039	1.3905	249050000	7	0.550174	1	-0.922448	-0.262875	Q61508	Q61508	Extracellular matrix protein 1	Ecm1
25.33	25.5208	26.067	26.988	26.9927	26.9493	2.42237	1.46725	19	19	19	36.9	36.9	36.9	59.752	0	102.79	882280000	71	1.29518	1	-0.920528	-0.371765	Q03265	Q03265	ATP synthase subunit alpha, mitochondrial	Atp5a1
20.1358	18.0268	20.6982	20.5373	21.5129	20.9995	0.744741	0.86372	1	1	1	6.4	6.4	6.4	17.66	0.0034443	1.4753	17133000	3	0.773464	1	-0.919415	-0.319115	Q9CQ48	Q9CQ48	NudC domain-containing protein 2	Nudcd2
21.2145	18.1034	20.7372	21.0439	21.5071	21.6683	0.635095	0.76993	2	2	2	1	1	1	294.84	0	6.5041	21995000	3	0.744806	1	-0.913688	-0.312698	Q8BTI8	Q8BTI8	Serine/arginine repetitive matrix protein 2	Srrm2
17.4746	22.4471	23.0745	22.4523	22.626	22.513	0.360366	0.06587	3	3	3	11.7	11.7	11.7	31.474	0	10.525	63754000	8	0.544327	1	-0.905789	-0.257898	Q8BH95	Q8BH95	Enoyl-CoA hydratase, mitochondrial	Echs1
19.5991	17.7041	20.1661	20.7418	18.8563	20.8849	0.434261	1.1427	2	2	2	3.9	3.9	3.9	57.432	0	3.8591	17961000	1	0.598799	1	-0.896142	-0.274858	Q61035	Q61035	Histidine--tRNA ligase, cytoplasmic	Hars
18.3949	18.5286	17.8013	19.6858	19.5117	19.5404	2.36209	1.1455	2	2	2	1.5	1.5	1.5	132.6	0	2.6177	5617800	2	1.02368	1	-0.883522	-0.340208	Q6PDG5;P97496	Q6PDG5;P97496	SWI/SNF complex subunit SMARCC2;SWI/SNF complex subunit SMARCC1	Smarcc2;Smarcc1	;
19.6885	21.0782	21.87	22.0966	21.8411	22.9544	0.91881	1.01833	3	3	3	10	10	10	43.185	0	5.6604	37691000	5	0.8311	1	-0.883124	-0.31882	Q9DBC7;P12849	Q9DBC7	cAMP-dependent protein kinase type I-alpha regulatory subunit;cAMP-dependent protein kinase type I-alpha regulatory subunit, N-terminally processed	Prkar1a
21.5974	21.4163	22.1367	22.904	23.1579	22.5165	1.79241	1.30662	3	3	3	8	8	8	51.386	0	16.12	59717000	10	1.2163	1	-0.878238	-0.353096	Q99JY0	Q99JY0	Trifunctional enzyme subunit beta, mitochondrial;3-ketoacyl-CoA thiolase	Hadhb
22.2045	22.0217	22.694	23.4891	23.6525	23.2656	2.14246	1.28464	4	4	4	13.8	13.8	13.8	32.886	0	9.6009	74439000	14	1.70544	1	-0.877519	-0.375891	Q91VR2	Q91VR2	ATP synthase subunit gamma, mitochondrial	Atp5c1
18.1592	18.9783	20.9565	20.1352	20.3309	20.5427	0.507157	1.35257	2	2	2	10.3	10.3	10.3	35.377	0.0077348	1.345	14770000	2	0.695884	1	-0.87671	-0.294767	Q8R010	Q8R010	Aminoacyl tRNA synthase complex-interacting multifunctional protein 2	Aimp2
20.2975	18.3523	19.922	21.1653	20.7895	20.4669	0.954996	0.86752	3	1	1	8.5	3.4	3.4	38.225	0	3.391	12589000	2	0.949374	1	-0.863191	-0.327232	Q3ULJ0	Q3ULJ0	Glycerol-3-phosphate dehydrogenase 1-like protein	Gpd1l
21.8323	18.4943	22.0322	21.9064	22.1566	21.9335	0.454389	0.10119	5	5	5	21.6	21.6	21.6	25.826	0	3.9107	34675000	5	0.685531	1	-0.858424	-0.28853	Q9JIK9	Q9JIK9	28S ribosomal protein S34, mitochondrial	Mrps34
23.7056	22.5773	20.9916	24.1389	23.6486	23.4863	0.7553	1.07122	8	8	8	13.4	13.4	13.4	63.294	0	12.625	104480000	16	0.812173	1	-0.857642	-0.309571	Q8C854	Q8C854	Myelin expression factor 2	Myef2
23.166	21.4795	24.3113	24.3711	24.0255	24.5112	0.721508	1.2051	10	10	10	14.6	14.6	14.6	92.866	0	39.864	189680000	33	0.702629	1	-0.850522	-0.290084	P97311	P97311	DNA replication licensing factor MCM6	Mcm6
20.0579	20.8983	21.8503	22.2074	22.3128	22.1664	1.17041	1.30909	4	4	4	7.1	7.1	7.1	54.356	0	6.7066	37273000	6	0.904253	1	-0.850483	-0.318909	P97807	P97807	Fumarate hydratase, mitochondrial	Fh
18.9481	16.9612	19.687	20.6121	20.7931	17.6237	0.364474	1.66395	1	1	1	2.5	2.5	2.5	48.768	0.00246	2.0606	11697000	1	0.564421	1	-0.850306	-0.255599	P70255;P70257;Q02780;P97863	P70255;P70257;Q02780;P97863	Nuclear factor 1 C-type;Nuclear factor 1 X-type;Nuclear factor 1 A-type;Nuclear factor 1 B-type	Nfic;Nfix;Nfia;Nfib	;;;
20.232	18.7862	21.5244	21.3623	21.4832	21.3437	0.699695	1.13035	3	3	3	7.3	7.3	7.3	55.674	0	3.4456	27165000	6	0.694192	1	-0.844179	-0.286995	Q8BZY3;Q61655	Q8BZY3;Q61655	ATP-dependent RNA helicase DDX19A	Ddx19b;Ddx19a	;
19.6212	21.2302	22.7465	22.8742	22.5474	22.4671	0.717899	1.31715	4	3	3	8.1	7	7	66.048	0	10.69	46533000	9	0.743774	1	-0.836396	-0.293928	Q6P5E6;Q8BMI3	Q6P5E6	ADP-ribosylation factor-binding protein GGA2	Gga2
22.5164	22.3799	24.1524	24.2552	24.5537	24.1552	1.05384	1.73879	6	6	6	18.6	18.6	18.6	44.816	0	18.409	143480000	18	0.952352	1	-0.833939	-0.319038	Q8QZT1	Q8QZT1	Acetyl-CoA acetyltransferase, mitochondrial	Acat1
21.9728	21.8062	22.5409	23.362	23.5093	23.6588	2.38097	1.53649	6	6	6	6.8	6.8	6.8	140.21	0	31.922	91025000	13	0.890686	1	-0.833478	-0.312651	Q9Z1Q9	Q9Z1Q9	Valine--tRNA ligase	Vars
21.6153	21.0535	21.9403	22.8328	22.3771	22.9814	1.70876	1.21748	3	3	3	6.9	6.9	6.9	63.845	0	7.4651	50432000	3	1.08806	1	-0.824683	-0.32736	Q80WJ7	Q80WJ7	Protein LYRIC	Mtdh
17.166	17.4799	20.3003	20.0106	20.2306	20.2457	0.859098	2.75072	1	1	1	1.7	1.7	1.7	66.406	0.0023669	1.6604	9215000	1	0.592032	1	-0.821256	-0.258447	O88342	O88342	WD repeat-containing protein 1	Wdr1
22.6002	22.1119	23.2066	23.8514	24.0051	23.6833	1.66512	1.25123	3	3	3	8.7	8.7	8.7	63.471	0	25.029	113820000	9	0.995457	1	-0.819191	-0.318498	Q8CHU3	Q8CHU3	Epsin-2	Epn2
22.5616	22.9932	23.2222	23.7615	23.935	23.6373	1.7994	0.76831	6	6	6	38.1	38.1	38.1	21.897	0	28.854	101090000	18	1.96999	1	-0.810657	-0.358304	P99029	P99029	Peroxiredoxin-5, mitochondrial	Prdx5
18.8621	20.5048	22.4514	22.1305	22.1619	21.3287	0.518925	1.62572	3	3	3	4.8	4.8	4.8	100.2	0	7.9366	37246000	6	0.626516	1	-0.805631	-0.264013	Q8VDM4	Q8VDM4	26S proteasome non-ATPase regulatory subunit 2	Psmd2
18.7383	18.6195	21.0487	21.158	20.4605	21.7771	0.883018	2.41976	2	2	2	3.9	3.9	3.9	75.884	0	5.1555	20083000	3	0.627371	1	-0.803576	-0.26377	P14824	P14824	Annexin A6	Anxa6
17.3863	17.194	18.61	20.0152	19.554	17.846	0.820551	2.16763	2	2	2	6.1	6.1	6.1	35.608	0	2.8618	8374300	2	0.550063	1	-0.800563	-0.241849	P63330;P62715	P63330;P62715	Serine/threonine-protein phosphatase 2A catalytic subunit alpha isoform;Serine/threonine-protein phosphatase 2A catalytic subunit beta isoform	Ppp2ca;Ppp2cb	;
21.9762	21.4977	23.138	23.3207	23.5328	22.8116	0.891853	1.34448	6	6	6	11.6	11.6	11.6	82.342	0	19.739	91970000	17	0.796827	1	-0.797808	-0.291719	P49718	P49718	DNA replication licensing factor MCM5	Mcm5
22.9617	22.8584	23.2117	23.9648	23.9422	23.9452	3.06332	0.9835	4	4	4	12.6	12.6	12.6	28.537	0	17.889	125590000	16	1.26895	1	-0.791023	-0.327064	O35381;Q64G17	O35381;Q64G17	Acidic leucine-rich nuclear phosphoprotein 32 family member A;Putative acidic leucine-rich nuclear phosphoprotein 32 family member C	Anp32a;Anp32c	;
20.1375	20.3939	18.8079	20.0962	21.0473	21.2316	0.771046	0.90981	1	1	1	1.2	1.2	1.2	164.42	0	3.8039	15569000	4	0.772006	1	-0.789626	-0.286233	Q4VA53	Q4VA53	Sister chromatid cohesion protein PDS5 homolog B	Pds5b
20.043	21.5681	22.1884	22.0925	22.3588	22.721	0.782185	0.79076	3	3	3	15.2	15.2	15.2	33.997	0	15.872	64426000	9	0.639653	1	-0.784359	-0.262292	P31230	P31230	Aminoacyl tRNA synthase complex-interacting multifunctional protein 1;Endothelial monocyte-activating polypeptide 2	Aimp1
23.9639	23.983	24.6062	24.5942	24.8111	25.0629	1.19679	0.8281	12	12	12	48.7	48.7	48.7	25.147	0	35.693	412360000	27	0.701345	1	-0.778921	-0.272751	Q62446	Q62446	Peptidyl-prolyl cis-trans isomerase FKBP3	Fkbp3
23.7996	23.2787	24.8532	25.2116	25.0891	25.4017	1.25023	1.412	9	9	9	17.8	17.8	17.8	56.585	0	44.138	320570000	43	0.794072	1	-0.767792	-0.283272	Q61753	Q61753	D-3-phosphoglycerate dehydrogenase	Phgdh
21.1367	20.6341	21.7137	22.2052	22.2396	22.2887	1.58879	1.10287	3	3	3	8.5	8.5	8.5	42.314	0	3.4887	39327000	7	0.954356	1	-0.765572	-0.298799	P39749	P39749	Flap endonuclease 1	Fen1
20.1169	19.8468	21.2084	20.8007	21.5149	22.3259	0.889263	1.39801	2	2	2	2.8	2.8	2.8	83.899	0	2.8285	23871000	2	0.837138	1	-0.760067	-0.28611	Q8CAQ8	Q8CAQ8	MICOS complex subunit Mic60	Immt
22.0864	21.0835	19.5597	22.246	22.2642	21.7075	0.70044	1.16254	3	3	3	6.9	6.9	6.9	55.238	0	5.8612	42656000	8	0.660434	1	-0.757306	-0.26025	Q99KP6	Q99KP6	Pre-mRNA-processing factor 19	Prpf19
18.8595	17.3579	21.2103	20.1533	20.7065	20.3958	0.490964	1.53635	3	2	2	4	2.8	2.8	76.221	0.0023641	1.6584	15026000	2	0.568532	1	-0.756629	-0.239052	Q61584	Q61584	Fragile X mental retardation syndrome-related protein 1	Fxr1
17.6429	20.4574	20.4416	20.3267	20.0402	21.6215	0.472147	-0.11488	3	3	3	7.1	7.1	7.1	59.715	0	6.4033	14710000	4	0.614753	1	-0.741686	-0.247364	Q922P9	Q922P9	Putative oxidoreductase GLYR1	Glyr1
21.5579	21.9327	23.7184	23.6722	23.2802	23.2228	0.656884	1.34754	4	4	4	15.3	15.3	15.3	34.877	0	7.2959	138480000	9	0.60876	1	-0.732237	-0.243938	Q922Q8	Q922Q8	Leucine-rich repeat-containing protein 59	Lrrc59
20.0523	19.9876	20.2963	21.1652	20.8709	20.9684	2.65032	0.91607	1	1	1	3.6	3.6	3.6	46.481	0.0066964	1.3829	13892000	1	2.17254	1	-0.726446	-0.328729	P45952	P45952	Medium-chain specific acyl-CoA dehydrogenase, mitochondrial	Acadm
18.3687	21.0396	21.2431	21.6166	21.4203	21.4977	0.62806	0.45811	3	3	2	17.1	17.1	12	23.412	0	8.2762	28085000	2	0.596205	1	-0.712414	-0.23673	P35278;P61021	P35278	Ras-related protein Rab-5C	Rab5c
18.0558	21.1045	22.5892	22.6843	18.0503	21.2889	0.0158203	0.18439	1	1	1	1.9	1.9	1.9	103.32	0	5.3076	21166000	1	0.496169	1	-0.705298	-0.205973	Q8CFE4	Q8CFE4	SCY1-like protein 2	Scyl2
18.8229	19.3193	19.9742	20.8964	21.0251	19.2911	0.727151	1.57711	1	1	1	6.6	6.6	6.6	20.203	0.0097826	1.2653	14557000	3	0.634293	1	-0.704551	-0.242817	Q99N89	Q99N89	39S ribosomal protein L43, mitochondrial	Mrpl43
21.5562	19.3864	22.0691	22.1737	22.114	21.9554	0.582348	0.55775	2	2	2	1.4	1.4	1.4	120.62	0	2.3767	35034000	9	0.713889	1	-0.703681	-0.255545	Q9JIS8;Q6P6P5;Q9WVL3;Q924N4	Q9JIS8;Q6P6P5;Q9WVL3;Q924N4	Solute carrier family 12 member 4;Solute carrier family 12 member 7;Solute carrier family 12 member 6	Slc12a4;Slc12a6;Slc12a7	;;;
17.7964	20.414	19.3414	19.9179	19.7863	19.4423	0.27624	0.44496	1	1	1	1.1	1.1	1.1	102.26	0.0096878	1.2135	4310600	2	0.889923	1	-0.700818	-0.273708	Q91W97	Q91W97	Putative hexokinase HKDC1	Hkdc1
19.8545	17.2764	20.8399	20.3141	20.5334	20.7047	0.486227	0.67889	2	2	2	4.8	4.8	4.8	57.147	0	3.3484	18855000	3	0.534293	1	-0.698857	-0.217741	Q922B2	Q922B2	Aspartate--tRNA ligase, cytoplasmic	Dars
22.3205	21.0033	23.1969	23.2831	23.4447	23.4143	0.879169	1.09384	9	9	9	9.6	9.6	9.6	123.97	0	13.423	100230000	13	0.653785	1	-0.694871	-0.243987	Q9EPU0	Q9EPU0	Regulator of nonsense transcripts 1	Upf1
20.6449	20.6253	21.7116	22.0071	21.9922	22.2265	1.37629	1.36219	3	3	3	3.2	3.2	3.2	116.8	0	6.6706	35543000	3	0.829786	1	-0.692734	-0.265903	Q80X50	Q80X50	Ubiquitin-associated protein 2-like	Ubap2l
22.5472	21.996	19.0404	23.1009	23.0851	21.1487	0.420682	1.08916	1	1	1	14	14	14	11.433	0	3.6826	84844000	4	0.495574	1	-0.686885	-0.202577	E9Q3T0;P47955	E9Q3T0;P47955	60S acidic ribosomal protein P1	Gm10073;Rplp1	;
18.7901	18.2817	20.7114	19.8189	20.0964	19.2534	0.232244	1.02875	1	1	1	8.1	8.1	8.1	27.285	0.0056818	1.4317	6186800	1	0.81253	1	-0.682989	-0.261363	Q9D6J6	Q9D6J6	NADH dehydrogenase [ubiquinone] flavoprotein 2, mitochondrial	Ndufv2
20.2522	20.1376	21.4016	21.4262	21.5632	21.89	1.13532	1.31095	3	3	3	2.9	2.9	2.9	98.144	0	3.6414	24997000	5	0.867681	1	-0.677825	-0.26483	P39054;Q8BZ98;P39053	P39054;Q8BZ98	Dynamin-2;Dynamin-3	Dnm2;Dnm3	;
26.0063	26.0036	25.8559	27.4009	27.2541	26.2941	1.36909	1.25052	7	7	7	56.5	56.5	56.5	7.8409	0	55.894	884240000	60	1.24185	1	-0.676535	-0.285855	P62858;J3QNN8	P62858	40S ribosomal protein S28	Rps28
23.835	22.8491	23.7761	24.5874	24.5288	24.0656	1.18672	0.75275	5	5	5	31.4	31.4	31.4	11.675	0	23.375	181470000	21	0.888786	1	-0.675628	-0.265873	P10639	P10639	Thioredoxin	Txn
17.9319	18.3864	20.0579	18.808	20.037	20.3392	0.514322	1.65059	1	1	1	8.4	8.4	8.4	24.977	0.0024631	2.0629	9475200	1	0.578977	1	-0.666704	-0.222691	Q9CYN2	Q9CYN2	Signal peptidase complex subunit 2	Spcs2
21.6268	18.6158	22.1798	21.721	21.964	21.3791	0.32255	0.09416	4	4	4	10	10	10	94.944	0	16.695	43786000	3	0.531334	1	-0.662985	-0.209796	Q6P542	Q6P542	ATP-binding cassette sub-family F member 1	Abcf1
18.6273	18.6578	19.059	20.0956	19.1388	20.3339	1.28929	1.43774	1	1	1	1.4	1.4	1.4	118.58	0.0034924	1.533	6180300	1	0.787267	1	-0.658247	-0.251616	G3X972	G3X972		Sec24c
16.4141	20.169	19.8001	20.4055	19.6157	19.657	0.377131	-0.1431	2	2	2	4.1	4.1	4.1	67.083	0	3.7617	10625000	2	0.523937	1	-0.646327	-0.204328	Q9JMH6	Q9JMH6	Thioredoxin reductase 1, cytoplasmic	Txnrd1
18.4215	21.1894	21.6718	21.3311	21.7207	22.012	0.539242	0.53135	2	2	2	5.6	5.6	5.6	48.206	0	5.5033	27125000	7	0.579059	1	-0.639978	-0.216665	Q99N87	Q99N87	28S ribosomal protein S5, mitochondrial	Mrps5
22.4185	22.5038	23.1463	23.4854	23.5495	24.0997	1.56095	1.04568	7	5	5	24	21.1	21.1	42.679	0	32.235	117360000	15	0.760726	1	-0.638524	-0.243167	Q78ZA7	Q78ZA7	Nucleosome assembly protein 1-like 4	Nap1l4
22.432	21.8612	22.5897	23.0859	23.2984	23.719	1.68621	0.86639	5	5	5	19.9	19.9	19.9	37.67	0	16.32	83752000	13	0.818052	1	-0.631141	-0.24638	Q9QYS9	Q9QYS9	Protein quaking	Qki
21.6524	21.1363	21.6049	22.7054	22.2039	22.4552	1.9711	0.85033	2	2	2	13.3	13.3	13.3	20.605	0	6.3607	51844000	6	0.732669	1	-0.629866	-0.237662	Q3UHX2	Q3UHX2	28 kDa heat- and acid-stable phosphoprotein	Pdap1
21.4653	22.0365	22.73	22.9551	23.2527	22.963	1.21599	0.92645	4	4	4	21.1	21.1	21.1	32.237	0	10.657	77719000	6	0.716633	1	-0.624069	-0.234196	Q8CDN6	Q8CDN6	Thioredoxin-like protein 1	Txnl1
19.9393	18.8654	18.9149	19.2115	20.9092	20.3309	0.67961	1.416	1	1	1	1.2	1.2	1.2	121.64	0.0068104	1.4276	8736000	1	0.742972	1	-0.623166	-0.23686	Q6A0A9	Q6A0A9	Constitutive coactivator of PPAR-gamma-like protein 1	FAM120A
17.3018	20.9461	18.8055	20.5567	19.9658	20.9579	0.60312	1.75117	1	1	1	3.8	3.8	3.8	51.564	0	4.4003	20485000	2	0.477342	1	-0.616949	-0.183545	P40124	P40124	Adenylyl cyclase-associated protein 1	Cap1
18.339	20.7229	20.8141	20.9549	21.0838	20.936	0.565318	0.23197	2	2	2	3.3	3.3	3.3	86.161	0	6.9188	17456000	3	0.62463	1	-0.612601	-0.218517	Q01405	Q01405	Protein transport protein Sec23A	Sec23a
21.0505	20.6721	22.3352	22.5405	22.3398	22.2605	0.942295	1.28923	4	4	4	5	5	5	102.36	0	10.403	52200000	10	0.635285	1	-0.610159	-0.219573	Q8BFY9;Q99LG2	Q8BFY9	Transportin-1	Tnpo1
20.6896	21.0254	21.3469	22.2661	21.4969	22.0884	1.44023	1.06299	3	3	3	12.3	12.3	12.3	33.88	0	8.6434	39468000	6	0.676178	1	-0.609039	-0.225057	P10711	P10711	Transcription elongation factor A protein 1	Tcea1
19.8067	19.5612	19.6617	20.2049	20.63	20.7678	2.02039	0.96827	3	3	3	37.5	37.5	37.5	7.0662	0	6.1755	17847000	4	0.608898	1	-0.602676	-0.213399	Q8K003	Q8K003	Translation machinery-associated protein 7	Tma7
18.4821	21.5881	22.2327	21.3741	22.0875	22.3707	0.419428	0.49942	4	4	4	3.3	3.3	3.3	194.74	0	17.964	40233000	8	0.511474	1	-0.595297	-0.190441	P39447	P39447	Tight junction protein ZO-1	Tjp1
24.6805	23.7006	23.3388	24.9075	25.1422	24.6922	1.12439	1.20687	1	1	1	4.1	4.1	4.1	35.755	0	3.2016	256190000	11	0.768957	1	-0.594461	-0.230928	Q8CGR7	Q8CGR7	Uridine phosphorylase 2	Upp2
19.2199	22.2489	23.0628	22.5016	22.7402	22.2198	0.342994	0.25264	5	5	5	14.5	14.5	14.5	46.577	0	10.786	45957000	13	0.567583	1	-0.593059	-0.203381	Q7TN29	Q7TN29	Stromal membrane-associated protein 2	Smap2
23.1475	22.5408	23.3936	24.0201	24.2964	23.7334	1.51811	0.87255	4	4	4	32.1	32.1	32.1	20.83	0	22.401	148650000	16	0.703414	1	-0.588533	-0.222603	P70296	P70296	Phosphatidylethanolamine-binding protein 1;Hippocampal cholinergic neurostimulating peptide	Pebp1
17.8943	20.2203	21.4358	21.6159	19.837	21.1093	0.358743	0.88895	1	1	1	1.7	1.7	1.7	64.124	0	2.301	25542000	3	0.482628	1	-0.583678	-0.179318	Q921F4	Q921F4	Heterogeneous nuclear ribonucleoprotein L-like	Hnrnpll
18.8017	20.9961	22.3365	21.484	22.1423	21.7322	0.439999	0.73612	2	2	2	3.6	3.6	3.6	99.242	0	7.2811	34476000	2	0.535564	1	-0.579978	-0.19338	Q91XX6;Q91XX8;Q91XX5;Q91XY5;Q91XX7;Q91XY9;A0A140LI48;Q91XY7;Q91XY2;Q91XX9;Q91XY8;Q91XX1;Q6DD96;Q91XW9;Q91XY4	Q91XX6;Q91XX8;Q91XX5;Q91XY5;Q91XX7;Q91XY9;A0A140LI48;Q91XY7;Q91XY2;Q91XX9;Q91XY8;Q91XX1;Q6DD96;Q91XW9;Q91XY4	Protocadherin gamma-A4	Pcdhgb4;Pcdhgb1;Pcdhgb5;Pcdhga3;Pcdhgb2;Pcdhga10;Pcdhga12;Pcdhga6;Pcdhga9;Pcdhga11;Pcdhgc3;Pcdhga7;Pcdhgc5;Pcdhga4	;;;;;;;;;;;;;;
18.9605	17.7696	19.9419	20.2162	20.2274	20.1279	0.968193	1.25567	1	1	1	5.7	5.7	5.7	14.254	0.0023337	1.5469	7876200	2	0.611954	1	-0.571814	-0.206021	Q9CWM4	Q9CWM4	Prefoldin subunit 1	Pfdn1
21.7965	22.5196	23.8407	23.6283	24.087	23.3789	0.705497	1.10873	4	4	4	8.1	8.1	8.1	48.994	0	10.932	103570000	17	0.704898	1	-0.569846	-0.217372	Q9D2G2	Q9D2G2	Dihydrolipoyllysine-residue succinyltransferase component of 2-oxoglutarate dehydrogenase complex, mitochondrial	Dlst
22.3372	22.3757	22.8835	23.5002	23.2276	23.4784	1.94093	1.10267	3	3	3	6.8	6.8	6.8	55.302	0	8.8782	103600000	17	0.693729	1	-0.569441	-0.216052	P70288;D3YYI8;O09106	P70288;D3YYI8;O09106	Histone deacetylase 2;Histone deacetylase;Histone deacetylase 1	Hdac2;Gm10093;Hdac1	;;
27.0098	26.7182	27.7629	28.0394	28.1928	28.1245	1.41503	1.11473	31	31	31	59.7	59.7	59.7	57.844	0	270.07	2456100000	166	0.719574	1	-0.566861	-0.217999	P52480;P53657	P52480	Pyruvate kinase PKM	Pkm
22.2369	21.6808	22.6836	23.011	22.7921	23.6264	1.15826	0.77411	6	6	6	5.4	5.4	5.4	141.74	0	12.655	80426000	9	0.688561	1	-0.561262	-0.213128	Q8VDJ3	Q8VDJ3	Vigilin	Hdlbp
21.1727	21.2895	22.2212	22.5922	22.2122	22.7886	1.22352	1.30274	4	4	4	8.3	8.3	8.3	54.087	0	13.18	50431000	13	0.706076	1	-0.559632	-0.214508	P97379	P97379	Ras GTPase-activating protein-binding protein 2	G3bp2
17.6199	19.6988	20.5872	20.0849	18.2907	20.4938	0.104249	0.38607	1	1	1	4.2	4.2	4.2	45.463	0	2.1361	5504800	1	0.543077	1	-0.559566	-0.190438	Q8BW10	Q8BW10	RNA-binding protein NOB1	Nob1
18.1756	19.7971	18.4501	19.3527	19.6675	19.8101	0.705742	1.21742	4	3	3	7.1	5.7	5.7	61.959	0	3.2575	4842100	4	0.884022	1	-0.55659	-0.22729	Q3TIX6	Q3TIX6		Fubp3
23.9231	23.9306	24.5578	24.8229	24.9812	25.0153	1.67104	1.05062	9	9	9	27.8	27.8	27.8	46.533	0	60.622	289930000	26	0.732532	1	-0.556013	-0.215997	P19324	P19324	Serpin H1	Serpinh1
20.1998	22.011	23.5036	22.8523	23.4948	22.6306	0.476984	0.84131	11	11	11	6.4	6.4	6.4	284.59	0	33.151	116840000	12	0.477214	1	-0.5496	-0.17103	P16546	P16546	Spectrin alpha chain, non-erythrocytic 1	Sptan1
22.8412	23.2303	23.296	24.0002	23.6408	24.0474	1.80747	0.76993	9	9	9	7.5	7.5	7.5	143.23	0	16.763	132070000	19	0.810208	1	-0.546264	-0.219184	Q9CU62	Q9CU62	Structural maintenance of chromosomes protein 1A	Smc1a
20.8686	20.1163	21.2172	21.549	21.4429	21.8092	1.18886	0.6804	3	3	3	7.2	7.2	7.2	48.043	0	3.2781	28473000	4	0.680823	1	-0.543463	-0.207135	Q9CQC6	Q9CQC6	Basic leucine zipper and W2 domain-containing protein 1	Bzw1
23.6076	22.7238	23.3496	23.9533	23.9691	23.6591	1.05899	0.60369	5	5	5	19	19	19	23.532	0	9.0049	153790000	16	0.681721	1	-0.543049	-0.207111	Q9D1J3	Q9D1J3	SAP domain-containing ribonucleoprotein	Sarnp
25.2429	25.2427	25.2949	26.1406	25.9491	25.6959	2.16898	0.70624	9	9	9	14.5	14.5	14.5	87.365	0	48.016	433450000	50	2.16149	1	-0.536481	-0.248841	Q80XL6;F6U473	Q80XL6	Acyl-CoA dehydrogenase family member 11	Acad11
19.0913	17.8529	19.3166	19.4639	19.2276	20.465	0.748214	0.37256	2	2	2	2.1	2.1	2.1	104.92	0	3.0831	7285500	2	0.621089	1	-0.534616	-0.197446	P30999	P30999	Catenin delta-1	Ctnnd1
21.8895	21.9152	21.316	22.7066	21.9385	22.5908	1.07296	0.70134	5	5	5	5.7	5.7	5.7	141.55	0	5.8114	47710000	10	0.797212	1	-0.534587	-0.214514	Q9CW03	Q9CW03	Structural maintenance of chromosomes protein 3	Smc3
23.4935	23.0557	23.9522	24.0825	24.4619	24.6492	1.3619	0.96838	5	5	5	24.6	24.6	24.6	27.341	0	30.283	182610000	27	0.732898	1	-0.533679	-0.209227	Q9WUK2	Q9WUK2	Eukaryotic translation initiation factor 4H	Eif4h
23.5278	23.1235	24.0007	24.3953	24.355	24.4539	1.53802	0.86747	10	10	10	26.2	26.2	26.2	47.688	0	31.931	190460000	26	0.720191	1	-0.531819	-0.20754	P50247	P50247	Adenosylhomocysteinase	Ahcy
19.0622	20.8364	21.2315	22.6162	21.3456	19.5617	0.291022	0.50927	1	1	1	14.1	14.1	14.1	10.916	0	7.3522	19484000	3	0.555103	1	-0.527843	-0.185259	Q9CQ75	Q9CQ75	NADH dehydrogenase [ubiquinone] 1 alpha subcomplex subunit 2	Ndufa2
21.0203	17.0327	20.2098	19.8536	20.2904	20.7431	0.283503	0.08062	1	1	1	15.6	15.6	15.6	9.9583	0.0096154	1.1832	13338000	1	0.488827	1	-0.51831	-0.168162	Q9CQS8	Q9CQS8	Protein transport protein Sec61 subunit beta	Sec61b
22.3983	22.114	22.9751	23.2355	23.3205	23.3977	1.47905	0.9222	5	5	5	13	13	13	52.22	0	12.553	97214000	10	0.656266	1	-0.516238	-0.196563	P60229	P60229	Eukaryotic translation initiation factor 3 subunit E	Eif3e
20.9264	21.4701	22.1526	22.3379	22.5158	22.0841	0.992601	0.86788	2	2	2	5.8	5.8	5.8	36.154	0	5.3332	37526000	9	0.916004	1	-0.515283	-0.214909	Q9WUM5	Q9WUM5	Succinyl-CoA ligase [ADP/GDP-forming] subunit alpha, mitochondrial	Suclg1
19.1512	19.4523	20.7559	20.3529	18.6539	20.2741	0.0116287	0.82186	1	1	1	4.1	4.1	4.1	21.782	0.0087912	1.3086	8320400	1	0.60604	1	-0.511017	-0.188962	Q9QUI0;Q62159	Q9QUI0;Q62159	Transforming protein RhoA;Rho-related GTP-binding protein RhoC	Rhoa;Rhoc	;
19.9703	19.925	19.6373	20.594	19.9021	20.6787	0.959337	0.66903	2	2	2	3.4	3.4	3.4	65.4	0	2.577	10277000	2	1.33424	1	-0.509171	-0.225817	Q9ER67	Q9ER67		Maged2
26.1921	25.9629	27.5089	27.4429	27.4726	27.2422	0.78753	1.25083	26	26	25	25.7	25.7	24.7	115.2	0	206.64	1455500000	143	0.68229	1	-0.508774	-0.197044	Q8VD75	Q8VD75	Huntingtin-interacting protein 1	Hip1
20.5765	21.6599	22.7296	22.5083	22.4148	22.651	0.625604	0.84838	5	5	5	8.6	8.6	8.6	75.673	0	12.725	73097000	10	0.516023	1	-0.508072	-0.172619	Q9D0I9	Q9D0I9	Arginine--tRNA ligase, cytoplasmic	Rars
20.0522	19.2144	20.1057	20.3971	20.3194	19.3603	0.205807	0.26718	2	2	2	2.2	2.2	2.2	92.188	0.0024331	1.9159	7046000	2	0.895383	1	-0.504978	-0.210338	Q6A068;A0A1W2P855;A0A1W2P7Z8;A0A1W2P7S8;A0A1W2P7H4;A0A1W2P6Q8	Q6A068;A0A1W2P855;A0A1W2P7Z8;A0A1W2P7S8;A0A1W2P7H4;A0A1W2P6Q8	Cell division cycle 5-like protein	Cdc5l	;;;;;
21.3281	21.6041	22.7935	22.9806	22.9392	22.4527	0.853227	1.33503	4	4	4	4.3	4.3	4.3	116.45	0	9.3509	62747000	12	0.637809	1	-0.50441	-0.191077	Q60597	Q60597	2-oxoglutarate dehydrogenase, mitochondrial	Ogdh
20.7466	21.2861	21.3987	21.8039	21.9748	21.728	1.49571	0.5178	2	2	2	5.2	5.2	5.2	76.723	0	9.4924	36216000	6	0.654328	1	-0.494267	-0.189927	Q3THK7	Q3THK7	GMP synthase [glutamine-hydrolyzing]	Gmps
20.6153	21.1834	20.8181	21.3879	21.1094	21.8006	1.00863	0.56977	2	2	2	4.2	4.2	4.2	48.968	0	3.336	27038000	7	0.697112	1	-0.485455	-0.191269	P59325	P59325	Eukaryotic translation initiation factor 5	Eif5
21.9328	22.1487	22.5911	22.8202	22.8775	23.4406	1.3845	0.72885	3	3	3	5.7	5.7	5.7	68.839	0	8.2546	79513000	14	0.632798	1	-0.483162	-0.184371	Q8BGD9	Q8BGD9	Eukaryotic translation initiation factor 4B	Eif4b
18.178	21.0068	22.3221	21.7718	21.5625	21.5217	0.38332	0.55573	5	5	5	10.2	10.2	10.2	62.766	0	9.8705	41256000	6	0.445548	1	-0.48281	-0.147643	P06745;CON__Q3ZBD7	P06745	Glucose-6-phosphate isomerase	Gpi
21.3974	22.0627	23.1302	22.9895	22.9572	23.1051	0.743074	0.92675	6	6	6	14.3	14.3	14.3	49.654	0	9.0844	78692000	19	0.595977	1	-0.482759	-0.179835	P84091	P84091	AP-2 complex subunit mu	Ap2m1
22.5818	22.1474	23.2815	23.3022	23.5737	23.4134	1.05064	0.83153	4	4	4	5.1	5.1	5.1	96.735	0	14.958	98141000	9	0.677095	1	-0.479116	-0.187566	P49717;Q9CWV1	P49717	DNA replication licensing factor MCM4	Mcm4
22.1532	22.3233	22.8493	22.9842	23.0856	23.0451	1.31979	0.72184	6	6	6	17.9	17.9	17.9	43.158	0	42.047	99035000	11	0.573148	1	-0.477217	-0.175172	Q7TNV0	Q7TNV0	Protein DEK	Dek
19.3973	18.905	21.2049	21.0061	21.3949	19.7068	0.427939	1.60879	1	1	1	2.5	2.5	2.5	42.785	0.0023474	1.5794	18585000	2	0.500408	1	-0.471107	-0.160584	P70404	P70404	Isocitrate dehydrogenase [NAD] subunit gamma 1, mitochondrial	Idh3g
24.2711	24.3118	24.7706	25.1443	25.3422	25.0121	1.73018	0.83252	9	9	9	16.9	16.9	16.9	83.935	0	28.25	276480000	22	1.01921	1	-0.470288	-0.202762	Q8BPU7;Q8BHL5	Q8BPU7	Engulfment and cell motility protein 1	Elmo1
19.9816	22.1884	22.7471	22.4828	22.6304	22.4832	0.455308	0.29478	6	3	3	22.7	13	13	28.302	0	10.071	63510000	7	0.498881	1	-0.469605	-0.159894	P61982	P61982	14-3-3 protein gamma;14-3-3 protein gamma, N-terminally processed	Ywhag
24.6013	24.1497	24.5456	25.1543	25.0242	25.2028	1.99088	0.60863	11	11	11	14.3	14.3	14.3	88.846	0	52.703	326070000	38	0.701317	1	-0.469005	-0.186459	Q62318	Q62318	Transcription intermediary factor 1-beta	Trim28
20.8983	20.2626	20.6204	21.1626	21.1312	21.4631	1.44224	0.54221	3	1	1	12.5	4.9	4.9	37.186	0	3.4461	20673000	1	0.802345	1	-0.467444	-0.192629	P62141	P62141	Serine/threonine-protein phosphatase PP1-beta catalytic subunit	Ppp1cb
26.7847	26.475	26.8085	27.1831	27.0829	27.9597	1.13819	0.39841	11	11	11	36.4	36.4	36.4	24.604	0	53.14	1761200000	87	0.701497	1	-0.465629	-0.185405	Q6ZWV3;P86048	Q6ZWV3;P86048	60S ribosomal protein L10;60S ribosomal protein L10-like	Rpl10;Rpl10l	;
24.6158	24.8596	25.6303	25.6566	25.923	26.2291	1.21786	1.06344	7	7	7	27.4	27.4	27.4	34.216	0	37.04	579970000	49	0.58923	1	-0.457464	-0.17189	P14869	P14869	60S acidic ribosomal protein P0	Rplp0
21.101	17.8953	21.0475	21.5236	21.1303	21.6473	0.59206	0.47616	1	1	1	4.9	4.9	4.9	32.168	0	8.2543	19041000	5	0.470464	1	-0.454949	-0.149676	Q9Z2D8	Q9Z2D8	Methyl-CpG-binding domain protein 3	Mbd3
21.6199	22.3648	22.275	23.1349	22.7704	22.4195	1.03397	0.49546	2	2	2	23.5	23.5	23.5	22.031	0	20.639	70959000	10	0.59768	1	-0.454393	-0.172046	Q64152	Q64152	Transcription factor BTF3	Btf3
22.634	22.0377	23.1952	23.7004	23.7559	23.4957	1.39612	1.06641	2	2	2	26	26	26	22.727	0	37.008	100080000	8	0.62673	1	-0.450849	-0.1742	Q9DCT8	Q9DCT8	Cysteine-rich protein 2	Crip2
20.6149	20.9679	18.419	21.499	21.544	20.1463	0.505387	0.88416	1	1	1	8.3	8.3	8.3	29.116	0	4.4173	19247000	2	0.496354	1	-0.450245	-0.154806	P99026	P99026	Proteasome subunit beta type-4	Psmb4
24.3915	24.1535	24.9559	25.2526	25.2657	25.4165	1.53574	0.87421	9	9	9	13.6	13.6	13.6	78.168	0	32.263	368790000	45	0.626221	1	-0.447724	-0.173214	Q60865	Q60865	Caprin-1	Caprin1
19.8039	18.464	20.0834	19.481	20.0197	19.9219	0.271804	0.11799	1	1	1	18.6	18.6	18.6	6.8998	0.002445	1.9677	8701000	2	0.574556	1	-0.446239	-0.166862	P84102	P84102	Small EDRK-rich factor 2	Serf2
22.5258	22.1085	22.7901	23.1418	23.3309	23.4956	1.71871	0.80507	5	5	5	4.1	4.1	4.1	176.07	0	28.538	91179000	12	0.622482	1	-0.442093	-0.171151	Q6NZJ6;Q80XI3	Q6NZJ6	Eukaryotic translation initiation factor 4 gamma 1	Eif4g1
23.3198	23.182	23.9388	24.0781	24.2465	23.9866	1.19706	0.75838	12	12	12	6.5	6.5	6.5	217.75	0	38.713	171380000	32	0.63373	1	-0.441627	-0.172113	Q6PDQ2;A2A8L1;B1AR17	Q6PDQ2	Chromodomain-helicase-DNA-binding protein 4	Chd4
22.288	20.7618	21.8343	22.2976	22.41	22.2758	0.702461	0.46328	3	3	3	4.2	4.2	4.2	98.197	0	10.546	44431000	7	0.648738	1	-0.437624	-0.172258	Q3UJB0	Q3UJB0		Sf3b2
22.0316	21.7494	22.6715	23.1031	22.6396	22.8994	1.12931	0.86787	10	7	7	26	20	20	46.839	0	17.965	69294000	8	0.627443	1	-0.437622	-0.170293	Q91VC3;A0A0N4SVP8;E9PV04	Q91VC3;A0A0N4SVP8;E9PV04	Eukaryotic initiation factor 4A-III;Eukaryotic initiation factor 4A-III, N-terminally processed	Eif4a3;Gm8994	;;
21.1523	20.4929	21.2092	21.9002	21.2001	21.7208	0.987239	0.56851	2	2	2	5.9	5.9	5.9	33.901	0	5.0824	27489000	4	0.683827	1	-0.433119	-0.173676	O35295	O35295	Transcriptional activator protein Pur-beta	Purb
25.3436	24.7839	25.4363	25.8561	26.0538	26.1785	1.70056	0.71022	13	13	13	35.7	35.7	35.7	56.3	0	75.175	520460000	54	0.72034	1	-0.431948	-0.175822	P56480	P56480	ATP synthase subunit beta, mitochondrial	Atp5b
20.6764	22.2768	22.3151	22.3714	22.6661	22.6092	0.655305	0.33232	3	3	3	6.9	6.9	6.9	49.03	0	4.8806	57341000	6	0.551751	1	-0.43156	-0.159706	Q8BWY3	Q8BWY3	Eukaryotic peptide chain release factor subunit 1	Etf1
23.6779	24.1223	24.7128	25.0129	25.0255	24.7148	1.10961	0.89065	9	9	9	19.3	19.3	19.3	54.507	0	29.4	279100000	35	0.625356	1	-0.431195	-0.168142	Q61553	Q61553	Fascin	Fscn1
19.1098	18.6397	19.1823	20.238	20.5282	18.872	0.772108	1.12812	2	2	2	6.8	6.8	6.8	47.447	0	3.2811	10077000	2	0.48225	1	-0.427889	-0.146453	Q9Z2N8;Q99MR0	Q9Z2N8;Q99MR0	Actin-like protein 6A;Actin-like protein 6B	Actl6a;Actl6b	;
23.4742	23.5497	24.135	24.4287	24.2416	24.4717	1.398	0.87898	12	12	12	17.1	17.1	17.1	102.08	0	41.522	196880000	32	0.667981	1	-0.427311	-0.170609	P97310	P97310	DNA replication licensing factor MCM2	Mcm2
19.2065	21.7414	21.7266	21.8339	22.0665	21.7809	0.519644	0.10732	4	4	3	11.5	11.5	8.8	39.025	0	9.038	32585000	13	0.501847	1	-0.425479	-0.149921	Q3TWW8;Q8VE97	Q3TWW8;Q8VE97	Serine/arginine-rich splicing factor 6;Serine/arginine-rich splicing factor 4	Srsf6;Srsf4	;
21.8724	21.5215	23.0604	23.2076	22.8909	23.0206	0.87096	1.14815	4	4	4	8.9	8.9	8.9	68.325	0	24.982	71523000	10	0.584335	1	-0.424972	-0.161996	P50516	P50516	V-type proton ATPase catalytic subunit A	Atp6v1a
22.9344	22.2942	23.1455	23.423	23.2905	23.7752	1.12763	0.48864	9	9	9	8.5	8.5	8.5	170.08	0	32.821	117240000	15	0.563745	1	-0.417204	-0.157294	Q8CGC7	Q8CGC7	Bifunctional glutamate/proline--tRNA ligase;Glutamate--tRNA ligase;Proline--tRNA ligase	Eprs
22.809	21.3674	23.3673	23.1603	23.8018	23.312	0.657745	0.50306	5	5	5	12.2	12.2	12.2	60.46	0	21.464	109720000	14	0.505679	1	-0.416481	-0.148374	P28652;Q923T9;P11798;Q6PHZ2	P28652;Q923T9	Calcium/calmodulin-dependent protein kinase type II subunit beta;Calcium/calmodulin-dependent protein kinase type II subunit gamma	Camk2b;Camk2g	;
23.0238	22.7439	22.9717	23.4512	23.5187	23.5315	2.55467	0.547	11	11	11	5.8	5.8	5.8	235.63	0	18.013	93788000	23	0.910014	1	-0.415523	-0.178852	E9Q7G0	E9Q7G0		Numa1
21.4229	21.2975	22.2243	21.8391	22.6425	22.4524	0.811289	1.02951	2	2	2	12.1	12.1	12.1	23.489	0	7.2785	42890000	4	0.681189	1	-0.414157	-0.167341	P51150	P51150	Ras-related protein Rab-7a	Rab7a
19.2605	18.1953	20.7131	20.8743	21.2292	18.8024	0.36205	1.61383	2	2	2	6.9	6.9	6.9	31.474	0	2.303	16527000	6	0.436533	1	-0.413304	-0.131139	P70677	P70677	Caspase-3;Caspase-3 subunit p17;Caspase-3 subunit p12	Casp3
24.1776	24.0424	25.1182	25.0715	24.8102	25.5324	0.802132	0.89389	8	8	8	5.8	5.8	5.8	199.13	0	47.043	345310000	23	0.573978	1	-0.406677	-0.15548	P20357	P20357	Microtubule-associated protein 2	Map2
21.2991	20.5208	21.3716	21.8002	21.6309	21.2418	0.707694	0.33183	2	2	2	6.4	6.4	6.4	36.954	0	3.5483	28827000	4	0.634135	1	-0.39857	-0.158778	Q9WVA3	Q9WVA3	Mitotic checkpoint protein BUB3	Bub3
20.0953	19.8804	18.4412	21.754	20.6285	21.052	1.27701	1.17161	3	3	3	9.4	9.4	9.4	45.626	0	9.1451	26281000	8	0.425667	0.993634	-0.398393	-0.124627	P62196	P62196	26S protease regulatory subunit 8	Psmc5
17.8826	19.6517	21.2685	20.4331	20.7569	20.3945	0.39836	0.78134	1	1	1	4.7	4.7	4.7	28.405	0	2.4709	17963000	0	0.440725	1	-0.397825	-0.129218	O70435	O70435	Proteasome subunit alpha type-3	Psma3
24.9347	23.1959	24.5553	24.6523	24.7919	25.3212	0.541004	0.23661	9	9	9	11.9	11.9	11.9	117.43	0	27.066	272690000	27	0.576243	1	-0.397069	-0.152902	P27546	P27546	Microtubule-associated protein 4	Map4
24.8997	24.7495	25.7755	25.9053	25.8097	25.8853	1.06085	0.98564	18	17	6	30.4	28.7	10.9	73.101	0	60.245	541590000	70	0.593642	1	-0.396492	-0.154522	Q62167;P16381	Q62167;P16381	ATP-dependent RNA helicase DDX3X;Putative ATP-dependent RNA helicase Pl10	Ddx3x;D1Pas1	;
20.2545	19.6469	20.1202	21.1495	20.7773	20.7393	1.7561	0.6571	2	2	2	5.4	5.4	5.4	54.191	0	6.9199	20016000	4	0.494046	1	-0.392817	-0.140251	P54823	P54823	Probable ATP-dependent RNA helicase DDX6	Ddx6
21.3179	17.9851	21.8546	22.7605	18.3937	22.2769	0.154216	0.95903	2	2	2	7.6	7.6	7.6	43.688	0	4.4368	40914000	4	0.389111	1	-0.391281	-0.108293	Q3THS6	Q3THS6	S-adenosylmethionine synthase isoform type-2	Mat2a
22.7969	22.1671	22.7265	23.2075	23.5465	22.803	0.995624	0.48097	5	5	5	22	22	22	27.372	0	15.661	83729000	13	0.634141	1	-0.390468	-0.156197	Q9QUM9	Q9QUM9	Proteasome subunit alpha type-6	Psma6
20.6961	20.8318	21.9932	22.4117	21.9975	22.2149	1.13478	1.3831	4	4	3	4.6	4.6	3.7	94.132	0	9.7222	49875000	9	0.479731	1	-0.388077	-0.136347	Q61316	Q61316	Heat shock 70 kDa protein 4	Hspa4
25.9298	26.0449	26.0978	26.3646	26.5113	26.9722	1.44958	0.46632	8	8	8	36.9	36.9	36.9	17.779	0	22.67	924060000	41	0.698359	1	-0.384804	-0.158655	Q8BP67;F6RSK3	Q8BP67	60S ribosomal protein L24	Rpl24
25.1496	25.4434	26.0759	26.2396	26.2863	26.2623	1.21307	0.81884	7	7	7	26.4	26.4	26.4	24.423	0	27.626	726970000	46	0.577164	1	-0.379625	-0.147769	P62827;Q14AA6;Q61820	P62827;Q14AA6	GTP-binding nuclear protein Ran	Ran;1700009N14Rik	;
21.3861	21.0809	21.8771	21.9893	21.7698	22.3063	0.961839	0.60327	3	3	3	12.2	12.2	12.2	60.248	0	4.5353	38650000	4	0.613617	1	-0.37818	-0.150633	Q3UEB3	Q3UEB3	Poly(U)-binding-splicing factor PUF60	Puf60
25.9973	26.102	26.2705	26.5121	26.7627	27.1943	1.50827	0.66066	5	5	5	24	24	24	23.564	0	23.329	987120000	41	0.643991	1	-0.377621	-0.152773	Q9CR57	Q9CR57	60S ribosomal protein L14	Rpl14
23.6379	23.0915	23.7945	24.2839	24.4547	24.1379	1.55669	0.64602	4	4	4	31	31	31	23.609	0	49.171	165570000	10	0.624682	1	-0.377348	-0.151252	P19157;P46425	P19157;P46425	Glutathione S-transferase P 1;Glutathione S-transferase P 2	Gstp1;Gstp2	;
23.6744	23.9547	25.3762	25.073	24.9141	25.2272	0.619123	1.11831	9	9	9	27.1	27.1	27.1	51.828	0	30.606	326760000	36	0.525073	1	-0.374081	-0.14009	P97855	P97855	Ras GTPase-activating protein-binding protein 1	G3bp1
24.6956	24.7004	25.0652	25.307	25.4821	25.4219	1.9302	0.72156	13	13	13	30.7	30.7	30.7	43.698	0	62.914	461330000	75	0.546409	1	-0.372808	-0.142409	P50580	P50580	Proliferation-associated protein 2G4	Pa2g4
18.7969	19.9887	20.8408	21.2081	20.5857	20.5569	0.652278	0.59702	1	1	1	3.5	3.5	3.5	34.463	0.0024876	2.1151	12415000	6	0.549798	1	-0.370704	-0.142183	Q61425	Q61425	Hydroxyacyl-coenzyme A dehydrogenase, mitochondrial	Hadh
23.8706	23.5891	24.9521	24.6981	24.6853	24.9788	0.694697	0.82745	11	11	11	22.8	22.8	22.8	65.574	0	47.982	290960000	30	0.520284	1	-0.369649	-0.138198	Q80UG5	Q80UG5	Septin-9	2009-09-01
22.3401	22.2365	23.4721	23.2352	23.2703	23.0417	0.549806	0.89517	4	4	4	5.6	5.6	5.6	113.1	0	19.65	107070000	13	0.507097	1	-0.368496	-0.13599	P11103	P11103	Poly [ADP-ribose] polymerase 1	Parp1
23.8315	23.701	24.4232	24.4458	24.5574	24.5872	1.13234	0.7259	13	13	13	13.1	13.1	13.1	121.63	0	20.747	223650000	37	0.603212	1	-0.365096	-0.145621	Q91ZW3;Q6PGB8	Q91ZW3	SWI/SNF-related matrix-associated actin-dependent regulator of chromatin subfamily A member 5	Smarca5
18.5293	20.3408	20.9353	21.4564	19.8835	20.6794	0.360142	0.33861	2	2	2	1.3	1.3	1.3	215.54	0	7.1815	16212000	3	0.468529	1	-0.362569	-0.127805	Q99104	Q99104	Unconventional myosin-Va	Myo5a
25.5387	25.491	26.6741	26.6298	26.6568	26.5416	0.847028	1.09113	14	14	14	37.2	37.2	37.2	44.55	0	92.061	951070000	73	0.539276	1	-0.357269	-0.137029	P09411;P09041	P09411	Phosphoglycerate kinase 1	Pgk1
21.8661	20.9011	23.7387	23.3703	22.9881	22.8972	0.469379	1.12205	8	6	6	25.3	21.5	21.5	39.394	0	31.762	99393000	17	0.439303	1	-0.356959	-0.119914	P05063;Q91Y97	P05063	Fructose-bisphosphate aldolase C	Aldoc
24.6574	24.4401	25.0886	25.1871	25.4177	25.5991	1.39516	0.76038	14	14	14	25.3	25.3	25.3	102.09	0	52.406	397370000	37	0.571442	1	-0.354445	-0.1395	Q78PY7	Q78PY7	Staphylococcal nuclease domain-containing protein 1	Snd1
23.733	23.2398	24.1405	24.0238	24.1627	24.9429	0.803174	0.42965	10	10	10	7.4	7.4	7.4	172.88	0	42.233	194000000	36	0.555587	1	-0.351938	-0.137192	Q99PL5	Q99PL5	Ribosome-binding protein 1	Rrbp1
23.0028	22.8115	23.8736	24.0223	23.9004	23.7191	0.897278	0.89763	5	5	5	7.1	7.1	7.1	95.222	0	26.149	153820000	16	0.515218	1	-0.349333	-0.131789	A0A0G2JEA5;Q920E5	A0A0G2JEA5;Q920E5	Farnesyl pyrophosphate synthase	Fdps	;
26.4347	26.3749	26.8923	27.1986	27.1088	27.2484	1.66937	0.76393	11	11	11	36.5	36.5	36.5	31.231	0	31.454	1317200000	68	0.610907	1	-0.344006	-0.139394	P25444;A0A140T8L5;J3QMG5;E9Q1N8;F6YTZ4;D3Z536	P25444;A0A140T8L5;J3QMG5;E9Q1N8;F6YTZ4;D3Z536	40S ribosomal protein S2	Rps2;Gm5786;Gm18025;Gm6576;Gm8225	;;;;;
19.832	18.4117	19.5753	20.2738	20.2241	20.163	1.01468	0.64881	2	2	2	7.5	7.5	7.5	26.334	0	2.723	9524900	3	0.511481	1	-0.342014	-0.129217	Q9CRB9	Q9CRB9	MICOS complex subunit Mic19	Chchd3
21.0642	20.7613	21.7407	22.07	22.0024	21.3664	0.786714	0.93816	4	3	3	5.5	4.4	4.4	109.36	0	4.7939	37187000	8	0.507123	1	-0.34104	-0.128366	O08810	O08810	116 kDa U5 small nuclear ribonucleoprotein component	Eftud2
24.3173	24.0701	25.1199	25.1687	25.0588	25.2508	0.955956	0.85133	18	18	18	28.2	28.2	28.2	89.321	0	71.034	362740000	47	0.519007	1	-0.340861	-0.129833	Q01853	Q01853	Transitional endoplasmic reticulum ATPase	Vcp
21.9578	22.4003	22.9347	23.2856	23.007	22.5465	0.656854	0.60679	3	3	3	18.4	18.4	18.4	21.708	0	13.435	69545000	12	0.617372	1	-0.338154	-0.137909	Q9DB15	Q9DB15	39S ribosomal protein L12, mitochondrial	Mrpl12
20.9788	21.0995	22.2345	22.4088	22.1062	22.0552	0.841816	1.00673	5	5	5	7	7	7	97.183	0	33.095	46612000	11	0.492669	0.998708	-0.337323	-0.125306	P70168	P70168	Importin subunit beta-1	Kpnb1
18.7752	18.8976	19.4944	19.4396	19.6256	19.5947	1.01773	0.69706	2	2	2	16.1	16.1	16.1	12.605	0	4.7444	4941800	4	0.81825	1	-0.336322	-0.146278	Q9D8T7	Q9D8T7	SRA stem-loop-interacting RNA-binding protein, mitochondrial	Slirp
19.4146	20.5445	20.7145	21.2973	20.5134	21.4117	0.790658	0.75279	1	1	1	11	11	11	9.7681	0.0066593	1.3621	18263000	3	0.513927	0.998163	-0.335576	-0.127676	Q9CQ69	Q9CQ69	Cytochrome b-c1 complex subunit 8	Uqcrq
22.5286	22.1972	22.9529	23.3559	23.1094	22.9998	1.15374	0.58078	4	4	4	7.4	7.4	7.4	91.545	0	17.967	85948000	15	0.557444	1	-0.335085	-0.132188	P25206	P25206	DNA replication licensing factor MCM3	Mcm3
20.4581	20.1328	19.7917	20.8639	21.0796	20.2879	0.946215	0.7311	1	1	1	1.3	1.3	1.3	105.1	0	7.5528	15351000	2	0.57361	1	-0.333335	-0.133059	D3YXK2	D3YXK2	Scaffold attachment factor B1	Safb
25.9343	26.0652	26.4165	26.4534	26.737	26.6786	1.34836	0.61334	6	6	6	38.8	38.8	38.8	17.804	0	28.818	960320000	26	0.586641	1	-0.330102	-0.133058	P35979;F8VQK7	P35979;F8VQK7	60S ribosomal protein L12	Rpl12;Gm16519	;
17.7452	17.8794	17.881	18.435	17.9915	18.5837	1.28188	0.55553	1	1	1	3.7	3.7	3.7	38.384	0	2.299	2422700	2	0.51131	0.995387	-0.327972	-0.125146	Q99JB2	Q99JB2	Stomatin-like protein 2, mitochondrial	Stoml2
25.0594	25.0982	25.9089	26.2622	26.0524	25.6121	0.855886	0.95416	12	12	12	44.1	44.1	44.1	35.611	0	53.87	514040000	54	0.644288	1	-0.325483	-0.13526	P08249	P08249	Malate dehydrogenase, mitochondrial	Mdh2
26.0362	26.0829	26.0865	26.5309	26.4647	26.9173	1.79454	0.448	8	8	8	52.8	52.8	52.8	14.463	0	19.16	912530000	39	0.601896	1	-0.325392	-0.132614	P62900	P62900	60S ribosomal protein L31	Rpl31
21.0471	18.7796	20.1021	20.5736	20.8479	20.5941	0.451478	0.49201	6	1	1	10.2	2.2	2.2	72.399	0	14.472	15562000	5	0.472318	0.99897	-0.323963	-0.118529	Q501J6	Q501J6	Probable ATP-dependent RNA helicase DDX17	Ddx17
21.9501	23.1368	23.8426	23.9343	23.8549	23.3636	0.567591	0.71815	9	9	9	14.7	14.7	14.7	91.369	0	41.169	154600000	24	0.447221	1	-0.32377	-0.113882	Q8JZQ9	Q8JZQ9	Eukaryotic translation initiation factor 3 subunit B	Eif3b
24.3309	24.228	25.0209	25.3017	25.1072	24.8519	0.932336	0.77633	9	9	9	14	14	14	85.462	0	50.277	286240000	40	0.664253	1	-0.322964	-0.135435	Q99KI0	Q99KI0	Aconitate hydratase, mitochondrial	Aco2
24.9961	25.113	25.322	25.4856	25.6704	26.1639	1.31756	0.55736	7	7	7	42.2	42.2	42.2	15.86	0	14.852	504330000	39	0.563905	1	-0.322171	-0.128687	P62911;P17932	P62911	60S ribosomal protein L32	Rpl32
26.6808	26.3893	26.8202	26.9899	27.0286	27.5424	1.19697	0.34782	11	11	11	38	38	38	18.431	0	27.405	1419100000	75	0.552723	1	-0.322137	-0.127708	P62281	P62281	40S ribosomal protein S11	Rps11
23.5726	22.079	23.0744	23.4045	23.4172	23.533	0.544088	0.34288	6	6	6	10.6	10.6	10.6	75.029	0	7.6363	101670000	8	0.550315	0.995519	-0.322041	-0.127461	Q9R190;Q924K8;Q8K4B0	Q9R190	Metastasis-associated protein MTA2	Mta2
21.1821	21.0804	21.7729	21.7071	22.0735	22.1631	1.16374	0.89138	2	2	2	12.4	12.4	12.4	31.062	0	12.213	30253000	6	0.725488	1	-0.320616	-0.137273	Q9CQ65	Q9CQ65	S-methyl-5-thioadenosine phosphorylase	Mtap
27.8881	27.6246	29.0614	28.9149	28.8733	28.8437	0.708373	0.98514	18	18	18	50.5	50.5	50.5	35.812	0	221.01	4761900000	151	0.490635	0.999251	-0.316728	-0.119259	S4R1W1;P16858;A0A1D5RLD8;V9GX06;Q64467;V9GXA7;V9GXK0	S4R1W1;P16858;A0A1D5RLD8	Glyceraldehyde-3-phosphate dehydrogenase	Gm3839;Gapdh	;;
22.685	22.902	24.0245	24.1276	23.7814	24.115	0.869594	1.21297	8	8	8	14.5	14.5	14.5	59.652	0	24.118	177670000	19	0.454152	1	-0.312771	-0.112445	P80313	P80313	T-complex protein 1 subunit eta	Cct7
26.6323	23.3641	26.0715	26.2527	26.2656	25.1974	0.197544	0.18123	33	14	0	49.8	28.7	0	60.024	0	78.659	625550000	67	0.437522	1	-0.312558	-0.109085	CON__P48668	CON__P48668
27.1891	26.9401	27.4623	27.694	27.7437	27.962	1.60706	0.55461	21	21	21	54.8	54.8	54.8	31.419	0	60.336	2160500000	126	0.536815	0.996882	-0.312557	-0.123248	P14148	P14148	60S ribosomal protein L7	Rpl7
21.6861	20.9158	21.8708	22.0952	22.0563	21.927	0.836654	0.37022	1	1	1	12	12	12	11.922	0	5.6825	36436000	6	0.588866	1	-0.307261	-0.125685	P26883	P26883	Peptidyl-prolyl cis-trans isomerase FKBP1A	Fkbp1a
21.2806	20.9441	21.7499	21.5811	22.4708	21.9699	0.916417	0.68931	3	3	3	10.3	10.3	10.3	51.572	0	8.1709	48921000	6	0.44722	1	-0.305534	-0.109293	P30416	P30416	Peptidyl-prolyl cis-trans isomerase FKBP4;Peptidyl-prolyl cis-trans isomerase FKBP4, N-terminally processed	Fkbp4
23.3257	23.8332	24.7713	24.9624	24.5816	24.415	0.677631	0.74843	8	8	7	21.5	21.5	19.5	50.906	0	21.913	201850000	26	0.564994	0.996394	-0.303406	-0.122711	P54071	P54071	Isocitrate dehydrogenase [NADP], mitochondrial	Idh2
26.8799	26.8034	27.3664	27.4484	27.5492	27.7438	1.34245	0.66928	19	19	19	68.3	68.3	68.3	26.674	0	152.44	1841600000	149	0.530757	1	-0.293942	-0.116854	P62908	P62908	40S ribosomal protein S3	Rps3
18.2064	19.6081	20.6907	20.3613	20.1744	19.1727	0.189893	0.56625	1	1	1	0.9	0.9	0.9	83.953	0.0098253	1.2772	13244000	4	0.414939	0.986	-0.293765	-0.099339	Q99MD9	Q99MD9	Nuclear autoantigenic sperm protein	Nasp
21.576	21.5645	23.306	22.4628	23.2978	22.9039	0.517721	1.32797	2	2	2	10.6	10.6	10.6	42.281	0	15.792	76963000	4	0.444453	1	-0.287782	-0.104186	Q8R5C5;P61164	Q8R5C5;P61164	Beta-centractin;Alpha-centractin	Actr1b;Actr1a	;
25.907	25.6669	26.2175	26.551	26.3774	26.2689	1.22775	0.47044	11	11	11	23.8	23.8	23.8	57.943	0	43.527	664720000	55	0.868374	1	-0.287291	-0.128433	Q8BGT5	Q8BGT5	Alanine aminotransferase 2	Gpt2
24.7003	24.6135	25.1094	25.3501	25.3131	25.1943	1.3939	0.6128	9	9	9	22.2	22.2	22.2	56.477	0	43.407	352080000	37	0.603378	1	-0.286421	-0.119457	P17225;Q8BHD7;B2RU80	P17225	Polypyrimidine tract-binding protein 1	Ptbp1
22.0439	22.0655	22.9396	22.6608	22.7858	22.7016	0.544627	0.63611	4	4	4	3.7	3.7	3.7	136.33	0	28.952	73762000	11	0.4867	1	-0.284559	-0.109442	Q6ZQ38	Q6ZQ38	Cullin-associated NEDD8-dissociated protein 1	Cand1
25.1585	25.2205	25.8392	25.9189	25.9787	26.2222	1.25911	0.75816	7	7	7	55.5	55.5	55.5	12.554	0	14.277	643510000	48	0.496469	1	-0.284033	-0.110399	O55142	O55142	60S ribosomal protein L35a	Rpl35a
24.5058	24.0673	24.3687	25.1017	25.0835	24.5297	1.21767	0.71474	7	7	7	22.7	22.7	22.7	44.547	0	73.884	276670000	33	0.522427	1	-0.273699	-0.109679	Q921F2	Q921F2	TAR DNA-binding protein 43	Tardbp
24.4171	24.0168	23.6851	24.6012	24.7334	24.6434	1.3466	0.62657	5	5	5	42.5	42.5	42.5	16.604	0	41.77	209840000	23	0.577978	1	-0.271586	-0.112874	O89086	O89086	RNA-binding protein 3	Rbm3
19.1249	19.4268	20.5672	20.3365	19.983	20.4361	0.52084	0.9097	1	1	1	3.2	3.2	3.2	27.855	0.0034843	1.5101	12323000	5	0.465815	0.999594	-0.271086	-0.102887	Q9WV55	Q9WV55	Vesicle-associated membrane protein-associated protein A	Vapa
22.3684	22.2614	23.1189	22.9894	23.6036	23.0068	0.85069	0.63842	6	6	6	18.4	18.4	18.4	46.582	0	23.693	82463000	13	0.512893	1	-0.268783	-0.107281	Q7TNC4;Q9CYI4	Q7TNC4	Putative RNA-binding protein Luc7-like 2	Luc7l2
23.69	23.2196	24.0893	24.3586	24.3901	23.6532	0.601988	0.66859	6	3	3	25.1	15.2	15.2	38.221	0	12.412	194030000	18	0.463519	0.996778	-0.268204	-0.101751	Q61990	Q61990	Poly(rC)-binding protein 2	Pcbp2
21.7051	21.4519	21.9814	22.3347	22.1416	22.297	1.53401	0.59191	3	3	3	22.3	22.3	22.3	16.369	0	6.9835	47047000	5	0.500732	1	-0.267017	-0.105604	Q9JMG1	Q9JMG1	Endothelial differentiation-related factor 1	Edf1
19.1799	18.6463	21.2434	21.4881	18.6343	21.4575	0.27175	2.27763	2	2	2	3.9	3.9	3.9	65.322	0	2.6132	19742000	1	0.380411	0.97927	-0.266995	-0.0831239	Q76MZ3	Q76MZ3	Serine/threonine-protein phosphatase 2A 65 kDa regulatory subunit A alpha isoform	Ppp2r1a
25.4537	25.3486	25.9941	26.271	26.103	26.1614	1.31793	0.70771	10	10	10	44.5	44.5	44.5	31.293	0	95.866	768520000	59	0.4667	0.999679	-0.26696	-0.101808	P57776	P57776	Elongation factor 1-delta	Eef1d
25.2845	25.0605	25.862	25.8892	25.8431	25.9879	0.974389	0.60473	8	8	5	32.3	32.3	22.2	37.497	0	35.788	601230000	38	0.493809	1	-0.264379	-0.104105	P60335;P57722;P57724	P60335	Poly(rC)-binding protein 1	Pcbp1
24.4088	23.9873	25.0494	24.837	24.8056	25.3092	0.650283	0.42818	15	15	15	30.6	30.6	30.6	62.581	0	57.754	333280000	47	0.469034	0.993007	-0.263389	-0.101056	Q60864	Q60864	Stress-induced-phosphoprotein 1	Stip1
27.3382	27.4368	27.5263	27.8048	27.838	28.2785	1.53699	0.40116	24	24	24	40.8	40.8	40.8	47.153	0	165	2383500000	167	0.516229	1	-0.2628	-0.105647	Q9D8E6	Q9D8E6	60S ribosomal protein L4	Rpl4
27.6786	27.5675	28.8852	28.8072	28.813	28.5316	0.712102	1.12861	21	21	5	51.1	51.1	16.2	49.67	0	303.43	4691100000	161	0.440246	0.990757	-0.26256	-0.0967383	P99024	P99024	Tubulin beta-5 chain	Tubb5
23.5289	23.4733	24.3387	24.1492	24.4057	23.3397	0.163023	0.62033	3	3	2	14.7	14.7	11.2	32.967	0	24.143	177300000	18	0.476296	0.98737	-0.259144	-0.100646	P47754	P47754	F-actin-capping protein subunit alpha-2	Capza2
25.5501	24.9214	26.3513	26.3648	26.2962	25.9739	0.631411	0.74609	13	13	12	46.7	46.7	46.7	22.176	0	28.58	798350000	49	0.441793	0.992617	-0.255737	-0.0951142	P35700	P35700	Peroxiredoxin-1	Prdx1
23.8892	23.5945	24.5492	24.6999	24.7235	24.6898	1.15471	0.81071	12	12	12	26.9	26.9	26.9	58.066	0	37.68	283550000	35	0.436682	0.993227	-0.252921	-0.0935337	P80315	P80315	T-complex protein 1 subunit delta	Cct4
27.6145	27.7692	27.7277	27.9869	27.9613	28.4415	1.23024	0.25911	25	25	25	45.9	45.9	45.9	46.109	0	174.29	2687900000	160	0.529513	1	-0.252118	-0.10315	P27659;E9PWZ3	P27659	60S ribosomal protein L3	Rpl3
23.9732	23.4399	24.3851	24.4212	24.6084	24.876	1.08718	0.63524	22	22	22	5.5	5.5	5.5	532.04	0	54.902	233780000	33	0.465947	0.992203	-0.251667	-0.0972093	Q9JHU4	Q9JHU4	Cytoplasmic dynein 1 heavy chain 1	Dync1h1
26.7714	26.5839	26.9126	27.1298	26.9867	27.6393	1.06068	0.35837	12	12	12	35.3	35.3	35.3	28.68	0	94.654	1467400000	78	0.50358	0.990502	-0.250766	-0.100699	P62754	P62754	40S ribosomal protein S6	Rps6
18.5554	19.2034	20.9222	20.6048	19.8919	19.5548	0.232572	0.68854	2	2	2	5.4	5.4	5.4	46.034	0	2.6331	10563000	3	0.419169	0.982835	-0.247282	-0.0889643	Q91X76	Q91X76		Nt5dc2
27.3008	27.3795	27.4353	27.7659	27.7885	27.8782	2.96864	0.40901	14	9	9	43.7	38.5	38.5	21.785	0	107.42	2210200000	74	0.509274	0.988437	-0.246182	-0.0996747	P43275	P43275	Histone H1.1	Hist1h1a
21.4505	21.0225	22.1355	21.6574	22.1704	22.368	0.613473	0.71991	3	3	3	11.4	11.4	11.4	38.358	0	17.897	44283000	5	0.448564	0.988808	-0.244728	-0.0929794	O35685	O35685	Nuclear migration protein nudC	Nudc
21.1109	21.3079	21.5285	20.8901	22.7221	22.2033	0.485151	0.89546	2	2	2	1.8	1.8	1.8	138.76	0	4.5607	32972000	4	0.475454	0.990195	-0.244722	-0.096154	Q62255;Q9QX96;Q9ER74	Q62255;Q9QX96;Q9ER74	Sal-like protein 3;Sal-like protein 2;Sal-like protein 1	Sall3;Sall2;Sall1	;;
26.404	26.3877	26.9762	27.0497	27.0331	26.7216	0.71445	0.62908	32	32	32	21.6	21.6	21.6	215.08	0	112.72	1064100000	130	0.650171	1	-0.243717	-0.105965	Q8BUR4;B2RY04	Q8BUR4	Dedicator of cytokinesis protein 1	Dock1
26.0008	25.9229	26.6803	26.6411	26.8998	26.7542	1.05131	0.75339	19	18	18	36.1	35.1	35.1	73.46	0	103.02	910600000	102	0.553041	0.993329	-0.243605	-0.101729	P38647	P38647	Stress-70 protein, mitochondrial	Hspa9
24.0532	23.7967	24.5231	24.6618	24.6088	24.8995	1.21982	0.60861	22	22	22	16.4	16.4	16.4	161.93	0	49.119	263730000	51	0.460636	0.990286	-0.241179	-0.0934469	P23116	P23116	Eukaryotic translation initiation factor 3 subunit A	Eif3a
20.0465	19.4033	20.5837	20.0699	20.6033	20.2433	0.321388	0.19683	3	3	3	25.6	25.6	25.6	14.141	0	4.7401	13364000	3	0.451627	0.984459	-0.238504	-0.091562	Q9DCG9	Q9DCG9	Multifunctional methyltransferase subunit TRM112-like protein	Trmt112
20.6769	20.3853	21.5818	21.882	21.6652	21.2539	0.823419	0.98829	2	2	2	4.9	4.9	4.9	39.638	0	3.4538	26780000	8	0.460403	0.988805	-0.23697	-0.0921517	Q9D6R2	Q9D6R2	Isocitrate dehydrogenase [NAD] subunit alpha, mitochondrial	Idh3a
23.2104	22.3347	23.6291	23.479	23.4962	23.9084	0.631722	0.28578	8	8	8	31.9	31.9	31.9	29.994	0	32.89	108940000	18	0.488918	0.990421	-0.236692	-0.094905	Q61792	Q61792	LIM and SH3 domain protein 1	Lasp1
20.1982	17.6334	19.9688	20.1441	20.0422	18.7634	0.153582	0.07335	2	2	2	4.8	4.8	4.8	46.839	0	3.4252	7949100	1	0.398951	0.974941	-0.236456	-0.0819778	Q9Z2I8	Q9Z2I8	Succinyl-CoA ligase [GDP-forming] subunit beta, mitochondrial	Suclg2
19.3475	18.904	19.6411	20.4902	19.9019	20.3949	1.57608	1.04738	2	2	2	8.2	8.2	8.2	39.502	0	5.5927	10192000	3	0.420789	0.977968	-0.232161	-0.0852612	Q9JHJ0	Q9JHJ0	Tropomodulin-3	Tmod3
22.6037	22.2766	23.0862	23.1954	23.2489	22.6827	0.58189	0.59172	4	4	4	30.4	30.4	30.4	23.407	0	23.259	91027000	6	0.443701	0.980077	-0.224419	-0.0864087	Q99PT1	Q99PT1	Rho GDP-dissociation inhibitor 1	Arhgdia
23.03	23.107	23.5987	23.8157	24.219	22.4138	0.154403	0.7087	4	4	4	9.3	9.3	9.3	70.264	0	13.502	97893000	15	0.507791	0.981569	-0.221898	-0.0914614	Q9DC50	Q9DC50	Peroxisomal carnitine O-octanoyltransferase	Crot
21.5584	21.8854	23.6213	23.3593	23.3467	21.6907	0.202159	1.46122	6	6	6	2.3	2.3	2.3	273.81	0	19.304	76774000	16	0.405054	0.96973	-0.220385	-0.0792771	Q07113	Q07113	Cation-independent mannose-6-phosphate receptor	Igf2r
23.9926	24.1841	24.4976	24.2988	24.6551	24.6649	0.761499	0.47095	8	8	8	27.5	27.5	27.5	44.714	0	47.916	253840000	30	0.457689	0.981936	-0.220218	-0.0867253	Q9CY58	Q9CY58	Plasminogen activator inhibitor 1 RNA-binding protein	Serbp1
26.3432	26.396	26.6144	26.7543	26.8635	27.4316	1.17721	0.46748	11	11	11	54	54	54	15.733	0	54.431	1197400000	72	0.473376	0.984	-0.218678	-0.0877434	P41105	P41105	60S ribosomal protein L28	Rpl28
24.0935	23.9882	24.6306	24.6041	24.6439	24.9578	1.02418	0.5504	14	14	14	14.6	14.6	14.6	105.53	0	46.343	289270000	41	0.433176	0.975237	-0.216303	-0.0826713	Q8R1B4	Q8R1B4	Eukaryotic translation initiation factor 3 subunit C	Eif3c
22.6367	23.2845	24.2055	24.0074	24.142	23.2971	0.347367	0.72289	5	5	5	23.7	23.7	23.7	31.195	0	18.158	134530000	12	0.450792	0.977249	-0.214314	-0.0841705	Q9ER00	Q9ER00	Syntaxin-12	Stx12
23.0617	22.5242	23.4871	23.6777	23.7455	23.005	0.546747	0.61601	3	3	3	11.6	11.6	11.6	42.435	0	11.779	114130000	7	0.443471	0.976313	-0.213418	-0.0830832	Q9JIF0	Q9JIF0	Protein arginine N-methyltransferase 1	Prmt1
26.7892	26.2141	26.2689	26.5745	26.8859	26.8716	0.777318	0.6027	4	4	4	25.2	25.2	25.2	12.784	0	56.153	989360000	38	0.561344	0.979505	-0.213071	-0.0912201	P62889	P62889	60S ribosomal protein L30	Rpl30
26.2052	25.7796	26.4669	26.5386	26.5351	26.5474	0.908234	0.33331	8	8	8	60.2	60.2	60.2	18.559	0	40.783	896470000	52	0.489611	0.983473	-0.212718	-0.0870891	P18760;P45591;Q9R0P5	P18760	Cofilin-1	Cfl1
27.4067	27.1694	27.3748	27.5606	27.7385	28.0334	1.37281	0.36371	18	18	18	56.1	56.1	56.1	29.885	0	82.006	2190200000	142	0.470701	0.981083	-0.211777	-0.0852798	P97351	P97351	40S ribosomal protein S3a	Rps3a
23.8237	23.5348	24.5641	24.1797	24.4544	24.5462	0.57281	0.63071	4	4	4	30.9	30.9	30.9	10.197	0	9.1509	181990000	16	0.527677	0.985597	-0.211341	-0.088988	Q8R1F0	Q8R1F0	Leydig cell tumor 10 kDa protein homolog	D8Ertd738e
17.736	21.043	21.288	20.9493	19.2903	20.954	0.106481	-0.09365	2	2	2	7.9	7.9	7.9	34.208	0	6.7336	19854000	4	0.363488	0.936865	-0.20972	-0.065717	Q99M28	Q99M28	RNA-binding protein with serine-rich domain 1	Rnps1
20.475	20.1423	20.259	20.5054	20.8718	20.201	0.466337	0.2464	1	1	1	3.2	3.2	3.2	29.812	0.0023781	1.6805	16450000	4	0.443499	0.972509	-0.209228	-0.081811	Q6NZB0	Q6NZB0	DnaJ homolog subfamily C member 8	Dnajc8
23.8218	23.7742	24.4205	24.5348	24.5954	24.0935	0.702434	0.71299	6	6	6	20.4	20.4	20.4	29.884	0	16.22	171920000	32	0.62139	0.987039	-0.208925	-0.0917813	Q99LB2	Q99LB2	Dehydrogenase/reductase SDR family member 4	Dhrs4
19.7205	20.3379	21.7275	21.5521	21.5187	20.3741	0.319893	1.1808	2	2	2	7.5	7.5	7.5	36.572	0	5.9152	26301000	4	0.389447	0.960036	-0.206914	-0.0725994	P16125	P16125	L-lactate dehydrogenase B chain	Ldhb
18.46	21.0674	20.8788	20.8351	20.9841	21.1728	0.437152	0.1053	1	1	1	2.2	2.2	2.2	47.408	0.0067568	1.4064	24395000	3	0.373985	0.945352	-0.206715	-0.0685597	P54775	P54775	26S protease regulatory subunit 6B	Psmc4
19.1136	20.0167	19.8146	20.3134	20.2251	20.4483	1.13815	0.49883	1	1	1	3.6	3.6	3.6	44.699	0	3.6751	11344000	0	0.443968	0.970185	-0.206513	-0.0810295	Q9ER88	Q9ER88	28S ribosomal protein S29, mitochondrial	Dap3
27.3813	27.652	27.7234	27.8677	27.8301	28.3641	1.01495	0.2157	14	14	14	42.9	42.9	42.9	33.509	0	82.634	2605900000	84	0.454687	0.971728	-0.203927	-0.0813106	P47911;E9PUX4	P47911;E9PUX4	60S ribosomal protein L6	Rpl6;Gm5428	;
19.2079	19.3736	20.2988	20.5752	20.1059	19.9028	0.652701	0.73225	1	1	1	4.5	4.5	4.5	24.87	0.0023392	1.5588	13233000	2	0.403178	0.959226	-0.202381	-0.0741803	O08709	O08709	Peroxiredoxin-6	Prdx6
26.9116	26.5379	26.6525	26.9476	27.0805	27.2347	1.31144	0.42797	29	29	29	41.8	41.8	41.8	77.648	0	130.02	1220800000	143	0.528609	0.978304	-0.198632	-0.0844829	Q9D0E1;Q91VC4	Q9D0E1	Heterogeneous nuclear ribonucleoprotein M	Hnrnpm
24.7547	24.9585	25.6823	25.6459	25.6246	25.5096	0.744199	0.66606	11	11	10	57.6	57.6	53.3	18.916	0	43.379	476440000	51	0.442395	0.963867	-0.194147	-0.0770155	P63325	P63325	40S ribosomal protein S10	Rps10
25.3324	25.2054	25.505	25.6805	25.7619	26.1771	1.38841	0.42957	5	5	5	23.1	23.1	23.1	13.293	0	13.514	535380000	31	0.464332	0.968147	-0.193384	-0.0787241	Q9D1R9;D3YWC0	Q9D1R9	60S ribosomal protein L34	Rpl34
23.0088	23.1279	24.0415	23.6804	24.0773	23.4998	0.415981	0.55247	14	14	14	23.9	23.9	23.9	67.839	0	44.311	191690000	23	0.386097	0.940695	-0.193173	-0.0684417	Q99MN1	Q99MN1	Lysine--tRNA ligase	Kars
22.7192	21.7663	22.3039	22.8321	22.9499	22.3346	0.591686	0.52814	6	3	3	9.3	6	6	70.887	0	9.0849	60140000	7	0.464139	0.966146	-0.192912	-0.0785525	Q8VHM5	Q8VHM5		Hnrnpr
21.5821	21.5884	22.0261	22.2656	22.6293	21.791	0.809403	0.67713	2	2	2	30.8	30.8	30.8	5.8378	0.002381	1.6944	39505000	6	0.49732	0.970782	-0.190605	-0.0799876	P56382	P56382	ATP synthase subunit epsilon, mitochondrial	Atp5e
21.0277	19.4714	20.4923	20.9299	20.6003	20.4696	0.28441	0.10804	2	2	2	12.3	12.3	12.3	18.757	0	3.7189	15502000	5	0.442725	0.96512	-0.190413	-0.0758678	O70492	O70492	Sorting nexin-3	Snx3
25.5256	25.2205	25.6035	25.7529	25.698	26.1704	1.0511	0.22731	5	5	5	26.6	26.6	26.6	16.966	0	6.3594	559320000	23	0.463588	0.965418	-0.189731	-0.0774518	F6QL70;W4VSN7;P47915;F6YH22	F6QL70;W4VSN7;P47915	60S ribosomal protein L29	Gm17669;Gm3550;Rpl29	;;
25.2563	24.9916	26.2133	26.1463	26.0489	25.5291	0.431312	0.7926	10	10	8	29.8	29.8	26.7	29.174	0	27.161	712420000	35	0.399468	0.954256	-0.188525	-0.0697796	P62259	P62259	14-3-3 protein epsilon	Ywhae
26.4328	26.2821	27.1003	27.1405	26.9947	27.1448	0.888236	0.70769	27	27	21	51.4	51.4	41.7	70.67	0	216.96	1397300000	117	0.423968	0.9556	-0.185166	-0.0722424	P29341;Q9D4E6;Q62029;Q8C7D3;A2A5N3	P29341	Polyadenylate-binding protein 1	Pabpc1
19.2124	19.1077	17.3041	20.9714	18.0997	18.6589	0.260027	-0.44882	2	2	2	2.8	2.8	2.8	95.832	0	3.2579	8011500	2	0.358534	0.929087	-0.18459	-0.0589085	P56399	P56399	Ubiquitin carboxyl-terminal hydrolase 5	Usp5
26.5335	26.7498	26.9494	27	26.9083	27.5154	0.821414	0.25019	11	11	11	45.5	45.5	45.5	17.698	0	59.543	1348700000	76	0.457953	0.961743	-0.181668	-0.0743263	A0A140T8M7;P62751;D3YTY6	A0A140T8M7;P62751	60S ribosomal protein L23a	Rpl23a	;
24.9312	24.274	25.3804	25.187	25.2542	25.2449	0.497381	0.31368	14	14	14	40.4	40.4	40.4	50.549	0	83.345	459140000	51	0.407933	0.945943	-0.181095	-0.068985	O55131;Q9DA97;Q8C650	O55131	Septin-7	2007-09-01
23.47	23.1157	24.324	24.11	24.211	24.3324	0.730746	0.74099	11	11	11	28.7	28.7	28.7	59.623	0	54.369	220980000	28	0.389065	0.939504	-0.180311	-0.065717	P80316	P80316	T-complex protein 1 subunit epsilon	Cct5
23.6543	23.0732	23.8068	23.8094	23.9712	23.9641	0.813241	0.30986	7	7	7	19.7	19.7	19.7	51.112	0	14.529	149650000	11	0.439695	0.953114	-0.179641	-0.0721351	Q9WTM5	Q9WTM5	RuvB-like 2	Ruvbl2
20.6516	18.9901	21.5509	21.67	21.6517	20.577	0.469075	1.00009	5	5	4	18.2	18.2	13.9	37.54	0	31.966	40070000	7	0.354517	0.919011	-0.1792	-0.0563793	P62137	P62137	Serine/threonine-protein phosphatase PP1-alpha catalytic subunit	Ppp1ca
20.088	19.7243	20.4291	20.5775	20.6405	20.4591	1.06955	0.48958	3	3	3	1.7	1.7	1.7	273.61	0	6.3238	15371000	4	0.417082	0.947447	-0.178545	-0.0694179	Q99PV0	Q99PV0	Pre-mRNA-processing-splicing factor 8	Prpf8
18.1162	19.853	18.628	20.0895	19.9856	18.0515	0.239289	1.35768	1	1	1	6	6	6	22.541	0.0024845	2.1144	9198800	2	0.361067	0.928314	-0.178279	-0.0584309	P61027	P61027	Ras-related protein Rab-10	Rab10
21.0568	21.0267	22.0976	22.1165	21.9722	21.84	0.740149	0.9154	3	3	3	6.1	6.1	6.1	80.208	0	9.9771	31956000	6	0.457585	0.961709	-0.177503	-0.0728989	Q9CQN1	Q9CQN1	Heat shock protein 75 kDa, mitochondrial	Trap1
25.512	24.8132	25.1395	25.4056	25.6175	25.4551	0.730733	0.31564	12	12	12	16.4	16.4	16.4	94.629	0	71.462	442240000	58	0.453666	0.957593	-0.177352	-0.0725538	Q8K310;A0A087WQ54	Q8K310	Matrin-3	Matr3
22.2178	21.8043	23.1152	22.6771	22.9411	22.9163	0.516042	0.69847	5	5	5	15.4	15.4	15.4	44.868	0	10.677	83253000	14	0.394082	0.942	-0.177276	-0.0657839	P63037	P63037	DnaJ homolog subfamily A member 1	Dnaja1
20.2914	20.8068	20.902	21.7602	21.2527	20.7423	0.770279	0.44595	3	3	3	13.5	13.5	13.5	28.152	0	5.0059	24337000	2	0.405624	0.941045	-0.176988	-0.0674693	Q9CQE8	Q9CQE8	UPF0568 protein C14orf166 homolog
22.4062	22.4447	22.9633	23.0632	23.2417	22.4994	0.502906	0.61847	1	1	1	11.3	11.3	11.3	12.459	0	3.2411	68846000	7	0.493344	0.965922	-0.176473	-0.0747478	Q9D2R8	Q9D2R8	28S ribosomal protein S33, mitochondrial	Mrps33
21.597	21.389	21.8238	22.0269	21.984	21.1789	0.156483	0.387	1	1	1	1.9	1.9	1.9	51.51	0.0067797	1.4205	29251000	5	0.583964	0.965702	-0.176116	-0.0779752	Q9DCN1	Q9DCN1	Peroxisomal NADH pyrophosphatase NUDT12	Nudt12
18.3326	18.0266	17.6731	19.5413	19.613	17.3572	0.467899	1.51464	1	1	1	2.8	2.8	2.8	57.927	0	4.498	5686500	2	0.358245	0.919979	-0.174648	-0.0567486	P52293	P52293	Importin subunit alpha-1	Kpna2
28.027	28.1013	28.243	28.3069	28.4559	28.7644	1.21588	0.35454	19	19	19	56.7	56.7	56.7	29.597	0	86.242	3534300000	138	0.446523	0.949838	-0.169965	-0.0695311	P62702;V9GWY0	P62702;V9GWY0	40S ribosomal protein S4, X isoform;40S ribosomal protein S4	Rps4x;Gm15013	;
26.5619	26.5161	27.0883	26.9324	26.9621	27.2144	0.701688	0.40023	8	8	8	32.6	32.6	32.6	20.266	0	76.035	1277600000	59	0.455268	0.955778	-0.169813	-0.070124	E9PYL9;Q9CXW4;E9PZB3	E9PYL9;Q9CXW4;E9PZB3	60S ribosomal protein L11	Gm10036;Rpl11;Gm5093	;;
19.5762	20.3816	18.203	17.9197	21.0399	20.5352	0.142432	0.95898	1	1	1	8.4	8.4	8.4	19.133	0	4.5038	10228000	2	0.359544	0.917634	-0.169803	-0.0561204	Q9CQ40	Q9CQ40	39S ribosomal protein L49, mitochondrial	Mrpl49
23.301	23.1666	24.5653	23.8507	23.8911	23.9443	0.186297	0.59012	7	7	7	5.3	5.3	5.3	134.11	0	16.826	142850000	23	0.450412	0.952371	-0.169255	-0.0695856	Q8C2E7	Q8C2E7	WASH complex subunit strumpellin	Kiaa0196
21.7841	21.8795	21.7657	22.349	21.9486	22.0178	1.08078	0.23372	3	3	3	11	11	11	41.704	0	11.707	37648000	10	0.558475	0.964275	-0.168764	-0.0743951	O09174	O09174	Alpha-methylacyl-CoA racemase	Amacr
24.425	24.1408	25.4023	25.1947	25.2067	25.2654	0.671537	0.7817	17	17	17	18.1	18.1	18.1	119.73	0	86.986	404170000	56	0.390713	0.938056	-0.166456	-0.0622277	Q91V92	Q91V92	ATP-citrate synthase	Acly
25.1833	24.7908	25.3254	25.2339	25.3642	25.6605	0.717511	0.18084	7	7	7	33.7	33.7	33.7	21.423	0	20.769	416820000	38	0.449954	0.942971	-0.166162	-0.0685039	Q9CPR4;B2RY53	Q9CPR4	60S ribosomal protein L17	Rpl17
23.0662	23.4881	22.6401	23.3636	23.1068	23.1353	0.20535	0.06908	4	4	4	23.2	23.2	23.2	20.861	0	11.487	85942000	22	0.516557	0.952901	-0.164902	-0.0715252	P10922	P10922	Histone H1.0;Histone H1.0, N-terminally processed	H1f0
21.5243	21.503	22.6264	22.596	22.3891	22.6701	0.811565	1.07163	4	4	4	13.2	13.2	13.2	37.331	0	32.766	66624000	8	0.379699	0.934553	-0.164602	-0.0597794	P62880;P29387;P62874;Q61011	P62880;P29387;P62874	Guanine nucleotide-binding protein G(I)/G(S)/G(T) subunit beta-2;Guanine nucleotide-binding protein subunit beta-4;Guanine nucleotide-binding protein G(I)/G(S)/G(T) subunit beta-1	Gnb2;Gnb4;Gnb1	;;
27.9149	27.7323	27.786	28.0975	28.1455	28.5709	1.3459	0.35945	17	17	17	55.9	55.9	55.9	24.305	0	133.16	2911200000	122	0.43659	0.942232	-0.163015	-0.0664265	P47963;A0A140T8K8	P47963;A0A140T8K8	60S ribosomal protein L13	Rpl13	;
22.5846	23.226	23.1017	23.1459	23.5229	22.6395	0.152815	0.04421	3	3	3	42.7	42.7	42.7	10.102	0	20.117	115110000	12	0.385696	0.9387	-0.161815	-0.0601104	O54962	O54962	Barrier-to-autointegration factor;Barrier-to-autointegration factor, N-terminally processed	Banf1
20.0589	17.062	21.5486	20.7141	17.7656	21.153	0.0660211	0.65512	3	3	3	3.1	3.1	3.1	107.66	0	4.5052	17590000	4	0.338799	0.903778	-0.161394	-0.04638	P17426;P17427	P17426;P17427	AP-2 complex subunit alpha-1;AP-2 complex subunit alpha-2	Ap2a1;Ap2a2	;
25.7997	25.4921	26.188	26.0232	26.2402	26.5997	0.813691	0.44052	6	6	6	24.4	24.4	24.4	20.732	0	18.908	760300000	65	0.419496	0.936045	-0.160973	-0.0642298	P62717;F6YJW4	P62717;F6YJW4	60S ribosomal protein L18a	Rpl18a;Gm17541	;
25.0074	24.6267	25.848	25.6123	25.5555	25.6753	0.554579	0.60482	7	7	7	29.6	29.6	29.6	15.137	0	38.404	556080000	39	0.388465	0.941293	-0.160414	-0.0601733	Q05816	Q05816	Fatty acid-binding protein, epidermal	Fabp5
22.8426	23.1756	23.0131	23.184	23.4448	23.4868	1.25684	0.4317	5	5	5	8.2	8.2	8.2	82.499	0	15.025	97502000	9	0.450304	0.935899	-0.156585	-0.0652379	Q91VR5	Q91VR5	ATP-dependent RNA helicase DDX1	Ddx1
27.7601	27.3433	27.6444	27.8393	27.7231	28.3177	0.790985	0.19493	11	11	11	46.4	46.4	46.4	17.222	0	49.25	2299500000	98	0.444464	0.937526	-0.151537	-0.0631056	P62301	P62301	40S ribosomal protein S13	Rps13
23.6874	23.229	24.0249	23.5323	23.9809	24.7143	0.444348	0.29352	7	7	7	15.5	15.5	15.5	47.006	0	20.784	171440000	24	0.398821	0.931281	-0.151401	-0.0589808	Q9DCL9	Q9DCL9	Multifunctional protein ADE2;Phosphoribosylaminoimidazole-succinocarboxamide synthase;Phosphoribosylaminoimidazole carboxylase	Paics
27.9287	27.509	27.6961	27.9597	27.8841	28.5268	0.806725	0.26359	19	19	19	59.3	59.3	59.3	22.591	0	64.435	2924100000	114	0.401167	0.933574	-0.150721	-0.0590532	Q6ZWN5	Q6ZWN5	40S ribosomal protein S9	Rps9
21.9686	22.1449	22.6968	22.7661	22.9621	22.1053	0.429555	0.62122	4	4	4	8	8	8	45.745	0	6.1361	66190000	8	0.395746	0.926092	-0.148688	-0.0577796	Q9QYJ0	Q9QYJ0	DnaJ homolog subfamily A member 2	Dnaja2
21.2026	21.797	22.0896	21.971	22.4228	22.1993	0.793568	0.40227	4	4	4	16.2	16.2	16.2	29.82	0	4.209	47671000	10	0.391221	0.924397	-0.147546	-0.0568542	P67778	P67778	Prohibitin	Phb
21.6972	21.195	21.6335	21.3624	21.7794	22.3876	0.423774	0.14589	2	2	2	5.2	5.2	5.2	47.744	0	3.5751	34146000	4	0.425789	0.936297	-0.146489	-0.0600455	O88712	O88712	C-terminal-binding protein 1	Ctbp1
22.2549	20.6497	23.0582	22.362	22.0907	22.8646	0.239268	0.10714	15	8	7	8.4	5.4	4.7	228.99	0	28.999	65499000	9	0.363729	0.916815	-0.145936	-0.0516413	Q61879	Q61879	Myosin-10	Myh10
26.3748	26.1872	26.6847	26.9761	26.8395	26.6447	1.09294	0.46475	8	8	8	52.3	52.3	52.3	14.839	0	37.608	1317900000	46	0.383575	0.912821	-0.145565	-0.0551955	P62245	P62245	40S ribosomal protein S15a	Rps15a
26.699	26.0644	27.0026	27.0899	27.0551	27.0275	0.780478	0.35611	17	17	17	45.9	45.9	45.9	47.14	0	96.949	1289200000	89	0.403403	0.922439	-0.14266	-0.0567847	P17182;P17183;P21550	P17182	Alpha-enolase	Eno1
25.0648	24.5206	24.7892	25.1035	25.1023	24.9235	0.680067	0.31309	9	9	8	16.6	16.6	15.5	76.775	0	78.317	308140000	48	0.46231	0.941773	-0.141983	-0.0607063	Q3U0V1	Q3U0V1	Far upstream element-binding protein 2	Khsrp
21.8903	21.3086	21.63	22.0521	22.1937	21.9466	1.169	0.42209	3	2	2	14	10.5	10.5	23.01	0	5.3259	44033000	7	0.390995	0.909215	-0.141029	-0.0548709	O54879	O54879	High mobility group protein B3	Hmgb3
25.5117	25.4286	25.5388	25.8143	25.9218	25.7345	2.18492	0.30255	9	9	9	26.1	26.1	26.1	63.963	0	33.149	548260000	53	0.428545	0.928162	-0.139684	-0.0579353	Q8R081	Q8R081	Heterogeneous nuclear ribonucleoprotein L	Hnrnpl
22.3013	22.8263	23.359	23.2895	23.2676	23.1505	0.589481	0.4413	6	6	6	12.5	12.5	12.5	55.758	0	13.873	85538000	19	0.422798	0.925462	-0.138767	-0.0572077	Q9CZN7;P50431	Q9CZN7	Serine hydroxymethyltransferase	Shmt2
26.2153	26.0338	26.5358	26.5671	26.7808	26.7714	1.28372	0.55608	6	6	6	30.4	30.4	30.4	16.605	0	20.279	1030900000	44	0.402737	0.915113	-0.138497	-0.0553915	P14115	P14115	60S ribosomal protein L27a	Rpl27a
18.3661	19.8384	21.3694	21.0282	21.3897	18.3849	0.115948	1.1898	3	3	3	10.3	10.3	10.3	34.741	0	3.5406	21189000	4	0.337555	0.899115	-0.135119	-0.0412015	O70503	O70503	Very-long-chain 3-oxoacyl-CoA reductase	Hsd17b12
26.5466	26.6555	26.8946	26.8362	26.8116	27.568	0.624934	0.18063	6	6	6	45	45	45	18.562	0	38.544	1303500000	58	0.413997	0.91053	-0.134737	-0.0551671	O09167;A0A140T8K5	O09167	60S ribosomal protein L21	Rpl21
25.4216	24.922	25.2817	25.6372	25.602	25.637	1.30881	0.35531	6	6	6	61.4	61.4	61.4	9.1413	0	70.168	445110000	37	0.428357	0.917418	-0.132567	-0.0554532	Q9CQR2	Q9CQR2	40S ribosomal protein S21	Rps21
23.1736	23.5051	23.7422	23.8913	23.5414	23.4335	0.277327	0.03638	7	7	7	25.7	25.7	25.7	36.108	0	44.343	152400000	17	0.378683	0.914528	-0.131379	-0.0503614	Q6ZWX6	Q6ZWX6	Eukaryotic translation initiation factor 2 subunit 1	Eif2s1
24.2112	23.7621	24.7446	24.7204	24.7429	24.8298	0.853337	0.5317	12	12	12	21	21	21	60.448	0	27.366	307750000	41	0.36854	0.906392	-0.129011	-0.0481171	P11983	P11983	T-complex protein 1 subunit alpha	Tcp1
21.5721	21.7888	22.1658	22.3049	22.7211	21.9572	0.799067	0.51616	4	4	4	7.2	7.2	7.2	101.43	0	16.051	56308000	10	0.371432	0.912154	-0.128952	-0.0485755	Q68FL6	Q68FL6	Methionine--tRNA ligase, cytoplasmic	Mars
24.1557	24.2101	24.9928	24.8465	24.9159	25.11	0.830581	0.70578	9	9	9	19	19	19	58.004	0	27.684	337500000	38	0.37299	0.909821	-0.127863	-0.0485067	P80317;Q61390	P80317	T-complex protein 1 subunit zeta	Cct6a
21.3876	17.6744	21.3166	19.9511	20.5073	21.7537	0.173077	-0.80934	1	1	1	15.5	15.5	15.5	11.993	0	3.124	17541000	3	0.342795	0.901857	-0.127618	-0.0416718	Q9CQX4	Q9CQX4	PCNA-associated factor	Paf
26.2854	26.4779	26.6303	26.6718	26.811	27.0916	1.16585	0.33309	9	9	9	36	36	36	23.464	0	20.385	1209600000	47	0.393534	0.91494	-0.126834	-0.050737	P19253;A0A1B0GS68;A0A140T8K2	P19253;A0A1B0GS68	60S ribosomal protein L13a	Rpl13a	;
23.4358	23.1897	23.7965	23.9355	23.9386	23.3158	0.398121	0.49972	4	4	4	22	22	22	22.186	0	9.418	152420000	18	0.376927	0.905188	-0.123579	-0.0478081	Q61686	Q61686	Chromobox protein homolog 5	Cbx5
20.7468	21.3619	22.1934	21.8224	21.999	21.561	0.339875	0.46051	3	3	3	13.9	13.9	13.9	29.729	0	4.3843	37316000	4	0.374155	0.905084	-0.122881	-0.0472236	Q4VAA2	Q4VAA2	Protein CDV3	Cdv3
23.0115	22.6854	22.9394	23.2235	23.4865	23.3798	1.7479	0.44038	1	1	1	19.6	19.6	19.6	6.4066	0	3.8525	102710000	7	0.384408	0.908439	-0.122051	-0.0482534	P62892	P62892	60S ribosomal protein L39	Rpl39
30.0475	30.2208	29.8953	30.4027	30.3693	30.3669	1.57702	0.3218	19	19	6	51.4	51.4	22.6	21.266	0	95.95	12388000000	174	0.42412	0.916646	-0.120646	-0.0509811	P15864;Q07133	P15864	Histone H1.2	Hist1h1c
27.6103	27.3753	27.4565	27.6736	27.6794	28.1633	0.95043	0.22297	17	17	17	39.7	39.7	39.7	28.024	0	45.348	2179100000	98	0.406384	0.913072	-0.120321	-0.049701	P62918	P62918	60S ribosomal protein L8	Rpl8
27.8478	27.3249	27.6168	27.9825	27.9345	27.8313	0.948081	0.31769	18	18	18	65.2	65.2	65.2	37.402	0	162.9	2256600000	117	0.418342	0.913685	-0.118952	-0.0500346	O88569	O88569	Heterogeneous nuclear ribonucleoproteins A2/B1	Hnrnpa2b1
28.1583	27.6883	28.199	28.2364	28.1754	28.6493	0.696827	0.07803	16	16	16	72.2	72.2	72.2	22.127	0	128.26	3057200000	115	0.412995	0.911476	-0.118195	-0.0494294	P62082;F6SVV1	P62082;F6SVV1	40S ribosomal protein S7	Rps7;Gm9493	;
21.194	20.3929	22.8738	21.7249	22.0175	22.323	0.287604	0.82354	6	6	4	40.9	40.9	29.5	17.274	0	7.2234	56814000	8	0.343156	0.894495	-0.115734	-0.0391573	P54227;P63042	P54227	Stathmin	Stmn1
22.5605	21.9207	22.908	23.1253	23.154	22.1676	0.334874	0.56476	3	3	3	11.4	11.4	11.4	36.46	0	13.04	89518000	12	0.35506	0.900138	-0.114154	-0.041608	Q9QZD9	Q9QZD9	Eukaryotic translation initiation factor 3 subunit I	Eif3i
21.8132	17.9712	21.9474	22.2448	22.0291	19.575	0.171084	0.21585	2	2	1	1.4	1.4	1.1	229.2	0	3.8075	34114000	2	0.329796	0.888965	-0.113422	-0.0338289	Q7TSC1	Q7TSC1	Protein PRRC2A	Prrc2a
27.05	26.7905	27.1857	26.9685	27.4569	27.5994	0.676573	0.40694	11	11	11	39.9	39.9	39.9	24.205	0	116.46	1699500000	103	0.37941	0.90417	-0.112823	-0.0448023	P62242	P62242	40S ribosomal protein S8	Rps8
23.2775	23.5659	24.4209	24.1594	24.165	23.9546	0.41022	0.59346	5	5	5	10.8	10.8	10.8	54.272	0	28.933	158040000	25	0.397515	0.901588	-0.112183	-0.0462552	O08749	O08749	Dihydrolipoyl dehydrogenase, mitochondrial	Dld
27.8693	27.5017	28.8267	28.5842	28.5216	28.483	0.513391	0.6523	21	21	21	49.4	49.4	49.4	49.909	0	216.03	4285400000	145	0.356779	0.893366	-0.11052	-0.0409506	P68373;P68369;P05213;P05214;P68368;Q9JJZ2;Q3UX10	P68373;P68369;P05213;P05214;P68368;Q9JJZ2	Tubulin alpha-1C chain;Tubulin alpha-1A chain;Tubulin alpha-1B chain;Tubulin alpha-3 chain;Tubulin alpha-4A chain;Tubulin alpha-8 chain	Tuba1c;Tuba1a;Tuba1b;Tuba3a;Tuba4a;Tuba8	;;;;;
20.8071	19.5979	20.6564	20.788	20.2791	20.4257	0.128959	-0.23066	1	1	1	3.5	3.5	3.5	57.568	0	5.6461	18161000	1	0.357612	0.891981	-0.108947	-0.0406623	Q8JZK9	Q8JZK9	Hydroxymethylglutaryl-CoA synthase, cytoplasmic	Hmgcs1
25.7187	25.659	26.3312	26.3259	26.1922	26.0785	0.582895	0.47349	10	10	10	29.2	29.2	29.2	49.508	0	60.884	662120000	52	0.420477	0.906061	-0.108533	-0.0464061	Q8BFR5	Q8BFR5	Elongation factor Tu, mitochondrial	Tufm
26.8614	26.8827	27.3012	27.0994	27.173	27.5717	0.578714	0.29029	12	12	12	40.1	40.1	40.1	24.916	0	53.626	1706800000	88	0.372497	0.904437	-0.10661	-0.0420768	P53026	P53026	60S ribosomal protein L10a	Rpl10a
26.7892	26.5199	27.0004	26.9713	27.2152	26.9688	0.808771	0.18208	21	21	21	49.2	49.2	49.2	50.976	0	115.62	1308000000	141	0.394797	0.902514	-0.105856	-0.0438875	P61979	P61979	Heterogeneous nuclear ribonucleoprotein K	Hnrnpk
28.5144	28.1273	28.4301	28.509	28.1517	29.2344	0.333304	0.0789	10	4	2	68	43.2	14.4	13.607	0	182.65	3765500000	50	0.399649	0.90458	-0.105105	-0.0439668	F8WIX8;Q64523;Q6GSS7	F8WIX8;Q64523;Q6GSS7	Histone H2A;Histone H2A type 2-C;Histone H2A type 2-A	Hist1h2al;Hist2h2ac;Hist2h2aa1	;;
25.4089	24.8222	25.16	25.483	25.4147	25.2531	0.621517	0.25467	12	12	12	38.7	38.7	38.7	34.384	0	51.388	414790000	49	0.387032	0.897176	-0.0994754	-0.041118	Q9Z204	Q9Z204	Heterogeneous nuclear ribonucleoproteins C1/C2	Hnrnpc
27.1764	27.1689	27.8502	27.7416	27.8229	27.7595	0.761472	0.58315	27	27	26	30.5	30.5	29.4	95.313	0	112.99	2449500000	141	0.359962	0.893855	-0.0987	-0.0380757	P58252	P58252	Elongation factor 2	Eef2
24.8512	24.8692	25.7664	25.9332	25.4776	25.2531	0.468747	0.60837	7	7	7	31.3	31.3	31.3	21.778	0	28.935	555250000	33	0.352035	0.896386	-0.0979376	-0.0366288	Q61171	Q61171	Peroxiredoxin-2	Prdx2
24.7664	24.893	24.9326	25.0891	25.1207	25.4363	1.3502	0.22772	3	3	3	53.8	53.8	53.8	7.4158	0	9.3104	310090000	27	0.438129	0.904408	-0.0973587	-0.0429185	Q9CQP0	Q9CQP0	39S ribosomal protein L33, mitochondrial	Mrpl33
27.1139	26.5242	26.7325	26.9285	26.9915	27.0713	0.510744	0.25904	6	6	6	35.4	35.4	35.4	21.881	0	21.77	1201500000	25	0.408029	0.895051	-0.0956812	-0.0410646	P51410;A0A140T8T4;S4R1R7	P51410;A0A140T8T4	60S ribosomal protein L9	Rpl9	;
22.4931	22.5177	22.9846	23.1971	23.0302	23.2042	1.32068	0.67939	8	6	3	30.5	27.2	14.2	28.086	0	21.12	95914000	22	0.355025	0.894341	-0.0938807	-0.0359436	Q9CQV8	Q9CQV8	14-3-3 protein beta/alpha;14-3-3 protein beta/alpha, N-terminally processed	Ywhab
26.7762	26.5667	26.8138	26.8498	26.8579	27.3855	0.741369	0.08174	15	15	15	53.8	53.8	53.8	17.258	0	46.806	1274400000	92	0.382686	0.895254	-0.0922284	-0.0383034	P61255	P61255	60S ribosomal protein L26	Rpl26
24.2187	23.5734	23.9093	24.0234	23.9703	24.3549	0.413649	0.11413	2	2	2	13.7	13.7	13.7	15.437	0	5.2794	143490000	18	0.478044	0.90303	-0.092226	-0.0418679	O35680	O35680	28S ribosomal protein S12, mitochondrial	Mrps12
25.2406	25.0313	26.1261	26.1131	25.9555	25.829	0.654685	0.71484	15	15	15	26.2	26.2	26.2	60.955	0	69.205	573460000	68	0.365238	0.894894	-0.091249	-0.0364264	P63038	P63038	60 kDa heat shock protein, mitochondrial	Hspd1
26.1866	26.1172	26.6303	26.7286	26.6358	26.7193	1.10254	0.53278	11	11	11	48.5	48.5	48.5	32.838	0	116.18	1205400000	67	0.349691	0.887717	-0.0882926	-0.0335047	P14206	P14206	40S ribosomal protein SA	Rpsa
21.1679	20.8124	21.755	22.2923	21.4845	20.8048	0.21481	0.31663	2	2	2	13.6	13.6	13.6	16.534	0	20.625	31031000	6	0.353207	0.892979	-0.0878549	-0.033901	O70591	O70591	Prefoldin subunit 2	Pfdn2
24.5082	23.6224	24.2249	24.3782	24.51	24.3609	0.488732	0.15329	9	8	8	19.4	18.1	18.1	68.539	0	19.976	219220000	18	0.363669	0.896258	-0.0869651	-0.0348887	Q91WJ8	Q91WJ8	Far upstream element-binding protein 1	Fubp1
27.4596	27.3635	28.242	28.1648	28.1906	27.748	0.480319	0.70521	10	10	10	47.6	47.6	47.6	17.971	0	40.192	2829300000	81	0.355691	0.895105	-0.0868583	-0.0339347	P17742;F8VPN3;V9GX31	P17742;F8VPN3	Peptidyl-prolyl cis-trans isomerase A;Peptidyl-prolyl cis-trans isomerase A, N-terminally processed;Peptidyl-prolyl cis-trans isomerase	Ppia;Gm5160	;
26.5412	25.9997	27.1659	27.0025	26.9188	27.0907	0.567796	0.4613	48	48	40	29.4	29.4	25.6	226.37	0	254.95	1283800000	167	0.357396	0.896869	-0.086545	-0.0340516	Q8VDD5;O08638	Q8VDD5	Myosin-9	Myh9
24.281	21.6739	23.8875	23.0915	23.2597	23.503	0.00155556	-0.62784	10	10	10	3.2	3.2	3.2	332.91	0	21.621	99376000	17	0.350573	0.883073	-0.0862646	-0.0330501	E9Q557	E9Q557	Desmoplakin	Dsp
22.2736	21.2213	22.3879	21.9979	22.5272	22.8296	0.480305	0.25364	3	3	3	8.3	8.3	8.3	41.063	0	14.673	52815000	6	0.353644	0.886325	-0.0856895	-0.0333112	Q9WV32	Q9WV32	Actin-related protein 2/3 complex subunit 1B	Arpc1b
27.2269	27.0347	27.3728	27.467	27.3437	27.5572	0.989568	0.24008	11	11	11	66.9	66.9	66.9	15.798	0	69.73	1844600000	67	0.363052	0.884319	-0.0822091	-0.0332822	P61358	P61358	60S ribosomal protein L27	Rpl27
27.9685	27.9199	27.7718	28.1118	28.0391	28.3521	1.18426	0.19197	17	13	13	43.5	34.5	34.5	22.576	0	71.785	2828100000	112	0.372984	0.890976	-0.0814462	-0.0338633	P43276	P43276	Histone H1.5	Hist1h1b
23.7816	23.4416	24.1978	23.9873	23.98	24.0837	0.402163	0.20572	8	8	8	21.8	21.8	21.8	51.065	0	31.853	191700000	27	0.347654	0.888476	-0.0788965	-0.0304474	Q9Z0N1;Q9Z0N2	Q9Z0N1;Q9Z0N2	Eukaryotic translation initiation factor 2 subunit 3, X-linked;Eukaryotic translation initiation factor 2 subunit 3, Y-linked	Eif2s3x;Eif2s3y	;
23.3389	23.1188	24.7363	24.1745	24.2082	23.5818	0.178836	0.83563	11	11	11	9.9	9.9	9.9	136.37	0	49.826	170010000	38	0.347079	0.887153	-0.0778871	-0.0300649	Q3UMB9	Q3UMB9	WASH complex subunit 7	Kiaa1033
24.6732	24.0167	25.1638	24.9002	25.0188	24.9012	0.408759	0.22803	12	12	9	21.5	21.5	18.1	69.632	0	61.724	341710000	37	0.345092	0.888483	-0.0754943	-0.0290685	Q7TMK9	Q7TMK9	Heterogeneous nuclear ribonucleoprotein Q	Syncrip
24.3276	24.3294	25.2704	24.9488	25.0112	25.1999	0.565082	0.68176	8	8	8	14.3	14.3	14.3	67.941	0	33.963	293010000	36	0.364169	0.889523	-0.0745664	-0.030822	Q8BMF4	Q8BMF4	Dihydrolipoyllysine-residue acetyltransferase component of pyruvate dehydrogenase complex, mitochondrial	Dlat
24.8417	24.2653	25.0887	25.4271	25.2162	25.1715	0.987032	0.37451	3	2	2	9.5	6.6	6.6	31.052	0	6.4551	344550000	10	0.352927	0.886685	-0.0721378	-0.0289922	O08807	O08807	Peroxiredoxin-4	Prdx4
22.2448	21.1092	21.4064	22.0458	21.8564	21.5383	0.241081	0.44998	3	3	3	3.5	3.5	3.5	108.18	0	6.1548	35657000	5	0.353647	0.88509	-0.0709915	-0.028693	Q569Z6	Q569Z6	Thyroid hormone receptor-associated protein 3	Thrap3
24.5585	23.8131	24.5766	24.6908	24.7204	24.4036	0.460124	0.1323	5	5	5	25.1	25.1	25.1	30.817	0	28.854	250210000	23	0.350873	0.882428	-0.0700803	-0.0281129	Q8BL97	Q8BL97	Serine/arginine-rich splicing factor 7	Srsf7
24.0927	23.4324	23.3109	23.6867	23.8327	23.9108	0.323048	0.40031	4	4	4	16.3	16.3	16.3	33.188	0	15.725	144050000	22	0.354975	0.880945	-0.0682077	-0.0278974	Q64012	Q64012	RNA-binding protein Raly	Raly
25.4911	25.3082	26.2135	25.7972	26.2007	25.9958	0.47259	0.50477	20	6	2	47.9	15.7	3.6	49.953	0	74.584	716920000	56	0.339272	0.885233	-0.0654554	-0.025243	Q9CWF2	Q9CWF2	Tubulin beta-2B chain	Tubb2b
32.505	32.3805	32.6451	32.5997	32.6373	32.9112	0.761088	0.13237	19	19	19	68.9	68.9	68.9	11.367	0	215.86	72330000000	358	0.390094	0.883134	-0.0648785	-0.028647	P62806	P62806	Histone H4	Hist1h4a
22.3132	21.4123	22.8514	22.3403	22.2911	22.5648	0.183796	0.02704	3	2	2	14.7	11.2	11.2	32.939	0	11.689	55230000	8	0.344773	0.8854	-0.0648537	-0.0257711	P47753	P47753	F-actin-capping protein subunit alpha-1	Capza1
23.0312	22.7799	23.5839	23.4583	23.4844	23.9121	0.80545	0.45319	10	10	10	20.9	20.9	20.9	57.477	0	36.321	155900000	20	0.331866	0.882434	-0.0639496	-0.0235709	P80314	P80314	T-complex protein 1 subunit beta	Cct2
28.6707	28.2811	28.8502	28.9047	29.0328	28.5732	0.47241	0.23392	21	21	21	65.4	65.4	65.4	42.713	0	230.99	5045600000	183	0.343524	0.884246	-0.0627484	-0.0249615	Q04447;P07310	Q04447	Creatine kinase B-type	Ckb
17.4705	20.4638	20.2517	20.5513	19.4962	19.3569	0.145766	-0.75542	2	2	2	2.5	2.5	2.5	80.859	0.0024213	1.8754	13885000	1	0.319817	0.8768	-0.0619793	-0.0198653	Q08943	Q08943	FACT complex subunit SSRP1	Ssrp1
23.815	23.5491	24.1033	24.183	24.049	24.1145	0.824895	0.29951	8	8	8	22.7	22.7	22.7	47.756	0	37.526	175510000	35	0.347844	0.882836	-0.0608544	-0.0247954	P32067	P32067	Lupus La protein homolog	Ssb
20.0329	18.4155	19.0589	18.9208	19.7405	19.831	0.233526	0.68161	1	1	1	1.1	1.1	1.1	79.763	0.0034803	1.5089	5798100	1	0.331427	0.879488	-0.0599141	-0.0223775	Q8BWW4	Q8BWW4	La-related protein 4	Larp4
25.2005	24.9448	25.1626	25.3756	25.3128	25.0282	0.438287	0.15024	12	12	12	48.5	48.5	48.5	36.169	0	55.632	387880000	33	0.353417	0.880907	-0.0592275	-0.0247064	P70372	P70372	ELAV-like protein 1	Elavl1
22.0676	21.7075	21.9395	22.0697	22.376	22.7021	1.06496	0.43649	6	6	6	12.2	12.2	12.2	68.527	0	22.1	56889000	10	0.333009	0.878368	-0.0579343	-0.0220815	Q91YQ5	Q91YQ5	Dolichyl-diphosphooligosaccharide--protein glycosyltransferase subunit 1	Rpn1
22.2745	22.3356	23.0396	23.0685	22.8681	22.6436	0.49273	0.53253	7	7	7	11.3	11.3	11.3	43.231	0	7.5546	70117000	18	0.345732	0.881327	-0.0565004	-0.0231487	P35486	P35486	Pyruvate dehydrogenase E1 component subunit alpha, somatic form, mitochondrial	Pdha1
25.4997	25.1206	25.1656	25.5983	25.5841	25.36	0.82055	0.41844	13	13	13	31.7	31.7	31.7	42.161	0	52.636	460510000	57	0.346489	0.87982	-0.0556178	-0.0229165	Q91VM5;Q9WV02;Q9DAE2	Q91VM5;Q9WV02	RNA binding motif protein, X-linked-like-1;RNA-binding motif protein, X chromosome;RNA-binding motif protein, X chromosome, N-terminally processed	Rbmxl1;Rbmx	;
21.3575	21.0366	21.7762	21.4051	22.0351	21.777	0.54832	0.4195	2	2	2	2	2	2	146.41	0	5.5853	32719000	4	0.339907	0.875732	-0.0535331	-0.0216087	Q64331	Q64331	Unconventional myosin-VI	Myo6
23.3337	23.1888	23.1503	23.2981	23.6003	22.9574	0.114081	0.10926	4	4	4	8.8	8.8	8.8	48.37	0	10.619	105500000	15	0.343477	0.877378	-0.0529585	-0.0217569	Q60749;Q9WU01	Q60749	KH domain-containing, RNA-binding, signal transduction-associated protein 1	Khdrbs1
24.3783	24.0347	24.6503	24.6759	25.0053	24.4833	0.715745	0.2976	12	6	6	14	7	7	103.93	0	16.195	241540000	31	0.344528	0.874388	-0.0512342	-0.0212568	O35643	O35643	AP-1 complex subunit beta-1	Ap1b1
25.5365	23.0643	25.8259	24.8349	24.79	24.478	0.0416081	-0.74653	25	10	10	44.4	27.9	27.9	51.267	0	74.752	355690000	43	0.321334	0.878764	-0.0486155	-0.0172753	CON__P08779;CON__Q9Z2K1;CON__Q3ZAW8;Q9Z2K1;Q9WTL4	CON__P08779
29.255	29.0779	29.5978	29.5969	29.6583	29.5858	0.918574	0.34186	25	25	25	49.6	49.6	49.6	50.113	0	162.46	8717000000	202	0.329285	0.877522	-0.0460701	-0.0180023	P10126;P62631	P10126	Elongation factor 1-alpha 1	Eef1a1
24.0403	24.6419	24.2377	24.6947	24.1992	24.1423	0.0535968	-0.03843	2	2	2	15.1	15.1	15.1	13.916	0	8.8153	209320000	16	0.342496	0.876585	-0.0451803	-0.0189934	P62320	P62320	Small nuclear ribonucleoprotein Sm D3	Snrpd3
18.9422	17.9264	19.5633	19.0344	19.0238	19.3235	0.258681	0.09217	1	1	1	2.2	2.2	2.2	44.116	0.0066741	1.3737	6907600	1	0.31953	0.872926	-0.0450077	-0.0159284	Q99KJ8	Q99KJ8	Dynactin subunit 2	Dctn2
23.8804	23.531	24.8649	24.5675	24.5636	24.1479	0.32464	0.68324	5	5	5	40.4	40.4	40.4	16.93	0	22.583	249430000	28	0.323087	0.874354	-0.0426898	-0.0160527	Q60605;Q8CI43	Q60605	Myosin light polypeptide 6	Myl6
18.8649	18.2808	18.9155	18.9528	19.3488	17.7464	0.00277523	0.08788	1	1	1	1.1	1.1	1.1	100.45	0.0097508	1.2512	3426800	1	0.324376	0.879736	-0.042429	-0.0161943	Q99MR6	Q99MR6	Serrate RNA effector molecule homolog	Srrt
25.2848	25.3302	25.6824	25.7513	25.6727	25.7484	1.06862	0.41821	10	10	10	30.3	30.3	30.3	35.076	0	64.722	592610000	54	0.326763	0.877996	-0.0411067	-0.0161435	P68040	P68040	Guanine nucleotide-binding protein subunit beta-2-like 1;Guanine nucleotide-binding protein subunit beta-2-like 1, N-terminally processed	Gnb2l1
20.9323	19.7233	20.7752	21.112	20.6848	21.1546	0.549633	0.3368	2	2	2	2.2	2.2	2.2	145.81	0	2.5949	17696000	3	0.326643	0.870026	-0.039113	-0.0155075	Q99NB9	Q99NB9	Splicing factor 3B subunit 1	Sf3b1
21.2402	20.6926	20.9506	21.5106	21.0671	20.7412	0.205129	0.11647	2	2	2	2.8	2.8	2.8	106	0	2.6109	22027000	2	0.332696	0.876272	-0.0389385	-0.0160692	Q8K019	Q8K019	Bcl-2-associated transcription factor 1	Bclaf1
26.0942	26.7732	26.3539	26.3229	26.5509	26.8503	0.268341	0.19702	7	7	7	41.4	41.4	41.4	15.423	0	26.75	1028000000	55	0.328777	0.871259	-0.0389094	-0.0156854	P62849	P62849	40S ribosomal protein S24	Rps24
24.6503	24.1938	25.0348	24.8836	25.0205	25.0283	0.640072	0.37021	8	8	8	14.6	14.6	14.6	63.988	0	16.586	320020000	28	0.326946	0.868364	-0.0385828	-0.0153761	O70194	O70194	Eukaryotic translation initiation factor 3 subunit D	Eif3d
21.7967	21.0619	21.5188	21.6592	21.6903	21.9422	0.585609	0.17142	4	4	4	20.9	20.9	20.9	26.585	0	11.832	33017000	12	0.329982	0.866909	-0.037045	-0.0151881	Q9CY57	Q9CY57	Chromatin target of PRMT1 protein	Chtop
24.7343	24.1545	24.4959	24.9227	24.8213	24.3033	0.361064	0.32544	10	10	8	26.5	26.5	23.7	38.354	0	51.781	285950000	34	0.323242	0.861602	-0.0353389	-0.0139015	Q60668;Q9D3U4	Q60668	Heterogeneous nuclear ribonucleoprotein D0	Hnrnpd
25.2681	24.8651	24.8094	25.1033	25.1508	24.8939	0.155654	0.23821	13	13	13	11.4	11.4	11.4	149.47	0	35.46	340440000	46	0.333674	0.866263	-0.0353231	-0.014887	O70133	O70133	ATP-dependent RNA helicase A	Dhx9
22.804	22.754	23.7225	23.6257	23.5786	22.6094	0.144374	0.77465	5	5	4	7.7	7.7	6.6	69.971	0	14.014	93788000	19	0.328219	0.862223	-0.0351882	-0.0144019	Q8R0H9	Q8R0H9	ADP-ribosylation factor-binding protein GGA1	Gga1
22.6113	22.3928	23.1847	23.0056	23.1093	23.1412	0.674077	0.49801	4	4	4	10	10	10	47.411	0	14.467	73850000	9	0.334049	0.865164	-0.0345993	-0.0146538	P05202	P05202	Aspartate aminotransferase, mitochondrial	Got2
25.8746	25.5539	25.3677	25.7685	25.5595	26.2435	0.442563	0.21462	4	4	4	37	37	37	10.275	0	13.955	534610000	28	0.333451	0.863991	-0.0340819	-0.014429	P61514	P61514	60S ribosomal protein L37a	Rpl37a
23.6991	23.262	23.6465	24.0846	23.7474	23.6772	0.738915	0.10088	8	8	8	32.5	32.5	32.5	30.53	0	41.613	134780000	28	0.328932	0.861274	-0.0323257	-0.0134851	Q9CX86	Q9CX86	Heterogeneous nuclear ribonucleoprotein A0	Hnrnpa0
21.5071	17.503	21.91	21.1782	20.7828	19.9773	0.0827761	-0.72435	2	2	2	8.1	8.1	8.1	23.473	0	2.609	24982000	3	0.309048	0.860928	-0.0311136	-0.00942323	Q91YN9	Q91YN9	BAG family molecular chaperone regulator 2	Bag2
28.126	27.6873	28.0481	28.1668	28.2622	28.0392	0.605167	0.1187	27	27	27	34.8	34.8	34.8	87.917	0	189.51	2850300000	199	0.327335	0.86017	-0.0300989	-0.0125854	Q8VEK3	Q8VEK3	Heterogeneous nuclear ribonucleoprotein U	Hnrnpu
27.7726	27.5913	27.9542	27.9817	27.8507	28.0847	0.733647	0.20914	7	7	7	39.5	39.5	39.5	13.373	0	47.815	2349900000	58	0.333247	0.861083	-0.0298629	-0.0128765	P60867	P60867	40S ribosomal protein S20	Rps20
25.7046	25.5309	25.9773	25.7381	26.0452	25.6594	0.1646	0.03351	11	9	9	41.9	35.8	35.8	24.893	0	35.637	697730000	55	0.318091	0.859017	-0.0293293	-0.011357	P63158	P63158	High mobility group protein B1	Hmgb1
24.098	23.9036	25.5007	24.8717	25.1286	24.7941	0.34824	0.77377	19	13	13	25	17.9	17.9	84.787	0	53.759	400460000	39	0.313015	0.860541	-0.0288725	-0.0102684	P07901	P07901	Heat shock protein HSP 90-alpha	Hsp90aa1
23.8159	23.73	23.953	23.7966	24.1388	24.1898	0.680309	0.32289	4	4	4	48.3	48.3	48.3	10.561	0	33.848	140320000	21	0.34181	0.860679	-0.0254345	-0.0114743	P58059	P58059	28S ribosomal protein S21, mitochondrial	Mrps21
21.8494	21.6494	22.4463	22.423	22.6893	22.1848	0.737393	0.57361	7	7	7	16	16	16	66.612	0	14.54	72913000	10	0.310893	0.860664	-0.0234547	-0.00837844	Q8QZY1	Q8QZY1	Eukaryotic translation initiation factor 3 subunit L	Eif3l
23.3092	23.0767	23.9377	23.6261	23.8606	23.465	0.302304	0.31686	7	7	7	21.5	21.5	21.5	50.213	0	35.827	136620000	21	0.31539	0.86144	-0.0220809	-0.00876405	P60122	P60122	RuvB-like 1	Ruvbl1
22.7043	22.1898	22.6967	22.9989	22.9988	22.6839	0.844028	0.30217	8	8	7	6	6	5.3	172.79	0	16.146	77536000	9	0.313173	0.861551	-0.0192776	-0.00760443	Q01320	Q01320	DNA topoisomerase 2-alpha	Top2a
23.9867	23.9233	24.8971	24.6181	24.8019	24.5039	0.498145	0.63145	13	13	13	29.4	29.4	29.4	59.555	0	45.614	314080000	41	0.307954	0.862558	-0.0149555	-0.00549077	P42932	P42932	T-complex protein 1 subunit theta	Cct8
27.7007	27.77	28.04	27.8666	27.9749	28.3131	0.561194	0.2049	17	17	17	41.4	41.4	41.4	29.976	0	57.723	2670500000	114	0.312664	0.864962	-0.014533	-0.00600347	P12970;A0A140T8L1;A0A140T8L3;V9GX35	P12970;A0A140T8L1;A0A140T8L3	60S ribosomal protein L7a	Rpl7a	;;
25.3716	25.1472	25.9474	25.7286	25.608	26.0836	0.500201	0.35699	7	7	4	44.4	44.4	37	35.73	0	69.741	601870000	33	0.309692	0.864242	-0.0143299	-0.00560768	P62960;Q9Z2C8	P62960	Nuclease-sensitive element-binding protein 1	Ybx1
21.9937	21.8639	22.5728	21.9894	22.7466	22.2586	0.238312	0.26493	3	3	3	37.9	37.9	37.9	12.974	0	6.8203	50635000	6	0.310462	0.861688	-0.0122471	-0.00502693	Q3UQA7	Q3UQA7	Selenoprotein H	Selh
21.6914	21.1672	22.1504	22.3254	21.8266	21.0033	0.0344119	0.13515	4	4	4	10.2	10.2	10.2	41.655	0	7.2359	50760000	11	0.30491	0.863255	-0.00952053	-0.00337694	Q99L47	Q99L47	Hsc70-interacting protein	St13
25.8343	25.7477	26.6004	26.2794	26.139	26.0613	0.13085	0.3047	8	8	8	30.4	30.4	30.4	22.889	0	42.573	811030000	58	0.306412	0.861496	-0.00830746	-0.00330146	P97461	P97461	40S ribosomal protein S5;40S ribosomal protein S5, N-terminally processed	Rps5
20.3866	20.4579	20.5502	20.6536	20.1774	20.8818	0.190808	0.19566	1	1	1	5.1	5.1	5.1	30.345	0	3.476	13038000	5	0.313986	0.863851	-0.008183	-0.00369759	Q9QZ06	Q9QZ06	Toll-interacting protein	Tollip
21.9121	20.8707	22.1745	21.8713	22.233	21.694	0.260622	-0.04082	2	2	2	10.7	10.7	10.7	24.936	0	11.551	34933000	3	0.306531	0.860594	-0.00713873	-0.00293281	Q9D8B3	Q9D8B3	Charged multivesicular body protein 4b	Chmp4b
21.7137	21.64	22.4286	22.2081	21.9278	22.5306	0.409046	0.49434	3	3	3	13	13	13	36.428	0	17.068	52694000	7	0.304979	0.859523	-0.00705433	-0.00271674	Q9DAW9	Q9DAW9	Calponin-3	Cnn3
26.7883	26.2365	26.9062	27.1058	26.8876	26.6699	0.432132	0.09931	7	7	5	54.1	54.1	46.7	14.467	0	69.743	1233200000	59	0.303989	0.860591	-0.00429964	-0.00173039	Q9D7S7	Q9D7S7	60S ribosomal protein L22-like 1	Rpl22l1
30.64	30.4777	31.4672	31.3002	31.2618	30.6091	0.197978	0.62185	74	74	74	43.5	43.5	43.5	191.55	0	323.31	20931000000	580	0.303074	0.860803	-0.00267553	-0.00109827	Q68FD5	Q68FD5	Clathrin heavy chain 1	Cltc
21.7311	20.864	21.5564	21.5313	21.8274	21.4902	0.336434	-0.02515	2	2	2	2.8	2.8	2.8	69.448	0	2.3185	32153000	1	0.302104	0.860401	-0.00160074	-0.000641296	Q8C2Q3	Q8C2Q3	RNA-binding protein 14	Rbm14
22.1451	21.9096	22.3715	22.5641	22.2624	22.3329	0.688897	0.1878	3	3	3	16.8	16.8	16.8	30.016	0	16.755	65109000	8	0.301497	0.859127	-0.000908852	-0.000343364	Q61166	Q61166	Microtubule-associated protein RP/EB family member 1	Mapre1
21.3327	20.5867	21.4718	21.5583	21.5384	21.3701	0.566526	0.20568	2	2	2	3.7	3.7	3.7	70.402	0	4.4271	24288000	3	0.300126	0.859487	0.00104046	0.000436739	Q64213	Q64213	Splicing factor 1	Sf1
21.6769	21.6406	22.3319	22.1792	22.2924	22.2633	0.729469	0.58633	3	3	3	7.4	7.4	7.4	49.694	0	11.265	52076000	9	0.300019	0.856487	0.00179005	0.000691675	Q8C1B7	Q8C1B7	Septin-11	2011-09-01
21.5817	22.5086	22.5484	22.2524	22.3588	22.3778	0.135334	-0.14982	2	2	2	6.5	6.5	6.5	34.238	0	3.5299	41372000	9	0.29854	0.855101	0.00180435	0.000805452	P38060;Q8JZS7	P38060;Q8JZS7	Hydroxymethylglutaryl-CoA lyase, mitochondrial;3-hydroxymethyl-3-methylglutaryl-CoA lyase, cytoplasmic	Hmgcl;Hmgcll1	;
19.1117	18.4889	21.8002	21.0656	21.8153	18.119	0.128876	1.95386	4	4	4	16.5	16.5	16.5	34.577	0	6.7062	21215000	4	0.300497	0.858163	0.00221252	0.000654962	O35593	O35593	26S proteasome non-ATPase regulatory subunit 14	Psmd14
26.0766	25.6577	26.4478	26.3107	26.52	26.2466	0.54322	0.23407	16	16	13	45.8	45.8	39.7	46.153	0	101.09	993410000	75	0.299874	0.853535	0.00222206	0.000842314	P60843;P10630	P60843;P10630	Eukaryotic initiation factor 4A-I;Eukaryotic initiation factor 4A-II;Eukaryotic initiation factor 4A-II, N-terminally processed	Eif4a1;Eif4a2	;
18.1019	20.6026	21.2005	21.2281	20.9521	18.9522	0.125978	0.34953	2	2	2	3.4	3.4	3.4	85.73	0	10.268	17414000	3	0.299779	0.85329	0.0041151	0.00133101	Q62351	Q62351	Transferrin receptor protein 1	Tfrc
25.9486	25.7604	26.1388	26.3231	26.2052	25.8479	0.416933	0.25663	20	20	20	38.2	38.2	38.2	67.63	0	90.296	752110000	98	0.294319	0.85747	0.00966358	0.00390447	P40142	P40142	Transketolase	Tkt
21.0668	20.7976	21.0285	20.8654	21.1842	21.0181	0.177321	-0.01043	3	3	3	29.1	29.1	29.1	12.51	0	9.6158	19753000	8	0.289994	0.853573	0.00984573	0.00429428	P16254	P16254	Signal recognition particle 14 kDa protein;Signal recognition particle 14 kDa protein, N-terminally processed	Srp14
22.213	21.5548	22.5983	22.1847	22.541	22.6995	0.445534	0.32796	10	4	4	16.9	6.8	6.8	67.758	0	4.8694	59747000	5	0.295322	0.855832	0.0101352	0.00391868	D3Z5M2;Q6PHQ9	D3Z5M2;Q6PHQ9	Polyadenylate-binding protein	Gm10110;Pabpc4	;
22.3485	22.6247	23.1767	23.0465	23.0211	22.5656	0.216614	0.39642	5	5	5	13.6	13.6	13.6	41.829	0	14.498	71264000	14	0.291877	0.852287	0.0106153	0.00445756	Q8BWT1	Q8BWT1	3-ketoacyl-CoA thiolase, mitochondrial	Acaa2
24.9516	24.3838	25.7175	25.2865	25.1186	25.1929	0.177158	0.24132	18	18	18	23.8	23.8	23.8	145.31	0	108.15	374700000	54	0.29256	0.851889	0.0121732	0.00492226	Q6PGL7	Q6PGL7	WASH complex subunit FAM21	Fam21
20.8984	17.9647	21.2203	21.2298	17.6686	21.5909	0.0279645	0.33132	2	2	2	3.7	3.7	3.7	61.249	0.0023502	1.6288	18361000	3	0.29795	0.858592	0.0123777	0.00371576	Q60598	Q60598	Src substrate cortactin	Cttn
17.9801	17.7582	20.8238	18.1153	20.2961	19.0758	0.0940129	1.09573	1	1	1	3.1	3.1	3.1	63.953	0	7.8936	8928400	2	0.297502	0.854184	0.012423	0.00392407	P06801	P06801	NADP-dependent malic enzyme	Me1
25.8232	25.4868	25.6681	25.8056	25.8458	25.6728	0.449961	0.13748	14	13	13	40.8	38.7	38.7	54.54	0	52.615	578580000	52	0.287449	0.852451	0.0156741	0.0065925	Q99K48	Q99K48	Non-POU domain-containing octamer-binding protein	Nono
25.9577	25.954	26.4754	26.2184	26.3676	26.2338	0.330803	0.27611	11	11	9	35.2	35.2	29	24.162	0	36.619	949690000	80	0.292002	0.853008	0.0163884	0.00631025	P30681	P30681	High mobility group protein B2	Hmgb2
27.5916	27.736	27.5931	27.5529	27.9057	27.9457	0.53115	0.31264	14	14	14	48.4	48.4	48.4	21.644	0	93.871	2407700000	92	0.289315	0.851328	0.0167556	0.00678643	P35980	P35980	60S ribosomal protein L18	Rpl18
20.0769	21.5243	21.703	21.3845	20.7412	21.4873	0.063289	-0.13987	1	1	1	1.9	1.9	1.9	57.543	0	3.3609	24783000	2	0.290372	0.850667	0.018014	0.00705073	Q3UKJ7	Q3UKJ7	WD40 repeat-containing protein SMU1;WD40 repeat-containing protein SMU1, N-terminally processed	Smu1
27.9374	28.0606	28.277	28.0829	28.1012	28.5254	0.341899	0.04065	8	8	8	33.6	33.6	33.6	14.865	0	63.334	2786100000	65	0.280036	0.850939	0.0186749	0.00816067	P62830	P62830	60S ribosomal protein L23	Rpl23
25.899	25.9606	25.8351	26.0315	26.0761	26.3178	1.19229	0.17711	7	7	7	36.6	36.6	36.6	14.552	0	32.888	686850000	30	0.283979	0.851224	0.0206385	0.00861979	Q6ZWV7;G3UWD7;F6XS56	Q6ZWV7;G3UWD7	60S ribosomal protein L35	Rpl35;Gm10269	;
25.1815	24.9855	25.5968	25.4368	25.6092	25.3935	0.51485	0.25529	13	13	13	31.1	31.1	31.1	50.06	0	51.912	572260000	59	0.290502	0.852102	0.0214801	0.00804522	Q9D8N0	Q9D8N0	Elongation factor 1-gamma	Eef1g
22.8247	22.2176	22.7324	23.2843	22.6457	22.8053	0.522744	0.0729	7	5	5	9.1	7.4	7.4	92.475	0	22.936	81779000	9	0.287291	0.851648	0.0238581	0.00929043	P08113	P08113	Endoplasmin	Hsp90b1
24.5303	24.0328	24.8986	24.6504	24.6512	24.8701	0.380591	0.12084	9	3	3	51	12.6	12.6	15.142	0	2.9228	230360000	12	0.276036	0.85161	0.0242243	0.0104747	P27661	P27661	Histone H2AX	H2afx
22.4594	22.907	23.9363	23.1056	23.6079	22.8365	0.0579586	0.19862	6	6	6	26.2	26.2	26.2	35.638	0	24.558	112260000	14	0.28839	0.85043	0.0248189	0.0093901	Q9Z1D1	Q9Z1D1	Eukaryotic translation initiation factor 3 subunit G	Eif3g
33.1977	32.7949	33.1254	33.068	33.2134	33.2671	0.448929	0.08798	12	12	3	74.6	74.6	14.6	14.161	0	163.07	89676000000	285	0.275923	0.849717	0.0258055	0.0110682	Q8CGP5;C0HKE9;C0HKE8;C0HKE7;C0HKE6;C0HKE5;C0HKE4;C0HKE3;C0HKE2;C0HKE1;Q8CGP6;Q8CGP7;Q8BFU2	Q8CGP5;C0HKE9;C0HKE8;C0HKE7;C0HKE6;C0HKE5;C0HKE4;C0HKE3;C0HKE2;C0HKE1;Q8CGP6;Q8CGP7;Q8BFU2	Histone H2A type 1-F;Histone H2A type 1-H;Histone H2A type 1-K;Histone H2A type 3	Hist1h2af;Hist1h2ah;Hist1h2ak;Hist3h2a	;;;;;;;;;;;;
19.2567	18.8761	19.2349	19.2294	19.2272	19.1347	0.229333	-0.00774	1	1	1	5.2	5.2	5.2	17.595	0.0023981	1.8006	5980500	4	0.279287	0.851198	0.0262299	0.0109714	O55128	O55128	Histone deacetylase complex subunit SAP18	Sap18
23.1621	23.3728	23.3958	23.6101	23.4668	23.0955	0.179739	0.09396	5	5	5	10.7	10.7	10.7	71.683	0	34.206	96072000	17	0.265397	0.848387	0.0268159	0.0119742	Q8C0I1	Q8C0I1	Alkyldihydroxyacetonephosphate synthase, peroxisomal	Agps
24.2013	24.1223	24.5715	24.4692	24.5835	24.2136	0.28253	0.26797	9	9	9	26.1	26.1	26.1	55.249	0	47.083	240240000	34	0.281784	0.848829	0.028163	0.0113769	Q99LF4	Q99LF4	tRNA-splicing ligase RtcB homolog	Rtcb
24.5629	24.5084	25.456	25.4459	25.3276	24.5034	0.229312	0.76471	10	10	10	23.7	23.7	23.7	51.736	0	61.153	362420000	43	0.281642	0.848625	0.0326877	0.0128304	Q9CZU6;Q80X68	Q9CZU6;Q80X68	Citrate synthase, mitochondrial;Citrate synthase	Cs;Csl	;
28.3578	27.8525	27.9559	28.0707	28.1669	28.4292	0.372412	0.21098	10	10	10	47	47	47	16.273	0	117.67	2863500000	96	0.2647	0.849597	0.0344691	0.0149759	P62264	P62264	40S ribosomal protein S14	Rps14
26.8103	26.3741	27.4109	27.276	27.3381	27.3676	0.697979	0.52778	16	16	16	35.2	35.2	35.2	60.629	0	70.638	1650000000	33	0.280199	0.852015	0.03824	0.0147345	P80318	P80318	T-complex protein 1 subunit gamma	Cct3
22.5039	23.0936	23.5869	23.2011	23.5701	23.1458	0.290274	0.10752	7	7	7	22.5	22.5	22.5	50.537	0	38.848	118830000	12	0.281149	0.850846	0.0393329	0.0148858	Q61598;P50396	Q61598	Rab GDP dissociation inhibitor beta	Gdi2
21.213	20.9201	22.4312	21.5683	21.7665	21.8436	0.163913	0.55348	2	2	2	9.8	9.8	9.8	21.092	0	7.4906	33457000	4	0.273643	0.851663	0.042892	0.0171315	Q9CR27	Q9CR27	WASH complex subunit CCDC53	Ccdc53
21.9291	22.049	23.1081	22.4157	22.1676	22.4205	0.0239726	0.36665	6	6	6	15.4	15.4	15.4	56.678	0	19.873	74187000	8	0.281687	0.850521	0.0438542	0.0160256	P27773	P27773	Protein disulfide-isomerase A3	Pdia3
23.782	23.0754	24.0591	23.7611	23.9163	23.749	0.222846	-0.02086	2	2	2	14.4	14.4	14.4	13.546	0	3.7367	144650000	11	0.269198	0.85387	0.045064	0.0183731	D3Z5N9;P62317	D3Z5N9;P62317	Small nuclear ribonucleoprotein Sm D2	Gm5449;Snrpd2	;
20.3772	20.0459	19.3776	20.2505	19.3357	20.5573	0.0861979	0.20456	2	2	2	2.1	2.1	2.1	114.99	0.0098146	1.2733	11402000	2	0.273071	0.851209	0.047627	0.018696	Q9DBR7	Q9DBR7	Protein phosphatase 1 regulatory subunit 12A	Ppp1r12a
26.4431	26.6879	25.8866	26.4865	26.424	25.8487	0.0989699	-0.01912	23	23	23	29.6	29.6	29.6	94.525	0	104.62	687290000	92	0.236077	0.854205	0.0483894	0.0217226	Q9DBN5;REV__A8C756	Q9DBN5	Lon protease homolog 2, peroxisomal	Lonp2
23.9646	23.9308	24.197	24.1994	24.4919	24.0701	0.674016	0.23476	2	2	1	31	31	15.5	9.4771	0	15.493	244600000	13	0.275982	0.852655	0.0489998	0.0186239	Q6ZWY3	Q6ZWY3	40S ribosomal protein S27-like	Rps27l
23.0406	23.4986	23.1337	23.7029	23.3446	22.9039	0.125898	0.21093	10	10	10	14.3	14.3	14.3	90.875	0	18.488	112350000	22	0.26918	0.852023	0.05057	0.0201656	Q04750;Q8R4U6	Q04750	DNA topoisomerase 1	Top1
26.3934	26.3666	26.7216	26.7024	26.2266	26.7618	0.124978	0.30896	12	12	12	32.3	32.3	32.3	34.4	0	48.474	1048000000	61	0.259775	0.856981	0.0595107	0.0242345	P47962	P47962	60S ribosomal protein L5	Rpl5
20.9804	20.9673	21.3421	21.2441	20.8584	22.1925	0.332844	0.26369	2	2	2	8.5	8.5	8.5	20.021	0.0034404	1.4747	27340000	5	0.264166	0.855752	0.063725	0.0249982	Q99LX0	Q99LX0	Protein deglycase DJ-1	Park7
21.0425	20.8459	22.0011	21.1831	21.4857	21.7157	0.159216	0.44314	1	1	1	6.2	6.2	6.2	20.524	0	7.0086	30334000	8	0.263711	0.854311	0.0637569	0.0250771	Q9JM76	Q9JM76	Actin-related protein 2/3 complex subunit 3	Arpc3
24.3957	23.9163	24.3703	23.9882	24.5299	24.5462	0.20444	0.15961	2	2	2	36.8	36.8	36.8	10	0	19.171	212900000	9	0.253995	0.852827	0.0652294	0.0267925	P31786	P31786	Acyl-CoA-binding protein	Dbi
19.8804	19.2242	20.6394	18.9415	20.8451	20.7078	0.124195	0.82746	1	1	1	0.9	0.9	0.9	145.24	0.0024096	1.8373	11470000	1	0.272889	0.858601	0.0668678	0.024197	Q7TMB8	Q7TMB8	Cytoplasmic FMR1-interacting protein 1	Cyfip1
25.641	25.1415	24.9485	25.5756	25.4325	24.7738	0.0175351	0.29094	5	5	5	38.4	38.4	38.4	19.329	0	42.583	425140000	34	0.25526	0.851481	0.0688415	0.0278465	P84104;A2A4X6	P84104;A2A4X6	Serine/arginine-rich splicing factor 3	Srsf3;Gm12355	;
20.9261	21.3663	22.0953	21.4886	21.8346	21.6545	0.215131	0.28818	1	1	1	9.6	9.6	9.6	12.504	0	7.1917	36754000	6	0.264243	0.854007	0.0693655	0.0266882	P34884	P34884	Macrophage migration inhibitory factor	Mif
23.4555	23.9114	25.0845	24.6439	24.4754	23.7349	0.084996	0.56396	8	8	6	22.5	22.5	19.9	45.345	0	45.551	303040000	27	0.274388	0.856746	0.0707941	0.0247929	P28656	P28656	Nucleosome assembly protein 1-like 1	Nap1l1
21.9725	22.0067	22.0737	21.9658	21.5396	22.3479	0.101607	-0.04091	4	4	4	10	10	10	38.092	0	20.048	65911000	8	0.272827	0.853408	0.0709324	0.0252604	Q99L45	Q99L45	Eukaryotic translation initiation factor 2 subunit 2	Eif2s2
21.9813	22.3779	23.8312	23.185	22.9653	22.5082	0.0933472	0.58746	4	4	4	6.8	6.8	6.8	91.712	0	25.751	88076000	13	0.267144	0.855379	0.0709548	0.0265965	Q9EQH3	Q9EQH3	Vacuolar protein sorting-associated protein 35	Vps35
25.159	25.124	26.1947	25.6301	25.7485	25.4994	0.13749	0.47116	14	14	14	54.8	54.8	54.8	41.525	0	119.33	597430000	49	0.263241	0.852818	0.0724034	0.0277625	P42208	P42208	Septin-2	2002-09-01
26.7268	26.1567	26.5072	26.7429	26.6053	26.4743	0.322327	0.09804	15	15	15	52.8	52.8	52.8	34.196	0	97.932	964130000	110	0.239121	0.854637	0.0761657	0.0320354	P49312	P49312	Heterogeneous nuclear ribonucleoprotein A1;Heterogeneous nuclear ribonucleoprotein A1, N-terminally processed	Hnrnpa1
25.7124	25.4984	26.6384	26.3172	26.4826	25.6199	0.163101	0.60477	13	13	7	13.9	13.9	6.8	104.58	0	41.178	709120000	80	0.250005	0.853184	0.0796881	0.0320452	Q9DBG3	Q9DBG3	AP-2 complex subunit beta	Ap2b1
24.003	24.1614	23.5497	24.0184	23.6211	24.0975	0.010718	0.01545	8	8	8	15.3	15.3	15.3	60.866	0	23.512	155110000	19	0.234015	0.853272	0.0805559	0.0340454	Q3TEA8	Q3TEA8	Heterochromatin protein 1-binding protein 3	Hp1bp3
24.0661	23.8456	24.8038	24.4939	24.1942	23.9611	0.0224665	0.12803	8	8	3	19.3	19.3	11.5	47.789	0	30.575	247200000	32	0.260683	0.852627	0.0814128	0.0308603	Q60973	Q60973	Histone-binding protein RBBP7	Rbbp7
27.7277	27.2572	28.2091	27.8481	28.0606	27.9039	0.296393	0.17612	32	32	24	37.7	37.7	28.6	83.28	0	244.07	3120800000	174	0.262487	0.853597	0.0814157	0.0304975	P11499	P11499	Heat shock protein HSP 90-beta	Hsp90ab1
22.7563	20.6309	22.2704	22.0469	21.824	22.4153	0.114268	-0.22349	4	4	4	7.7	7.7	7.7	50.525	0	4.0031	40393000	5	0.253794	0.851245	0.0830951	0.0325717	CON__Q6KB66-1;CON__Q0VBK2;Q0VBK2	CON__Q6KB66-1;CON__Q0VBK2;Q0VBK2	Keratin, type II cytoskeletal 80	Krt80	;;
21.2749	20.9057	22.1947	22.4579	20.6528	21.797	0.0975067	0.52211	13	1	1	21.1	1.5	1.5	73.427	0	3.0183	39652000	7	0.266956	0.854385	0.0835671	0.0300385	Q62095	Q62095	ATP-dependent RNA helicase DDX3Y	Ddx3y
24.0496	23.729	24.264	23.9237	24.0099	24.2209	0.0732019	-0.03968	7	7	7	14.2	14.2	14.2	67.314	0	20.007	198650000	22	0.250405	0.852204	0.0868106	0.0342483	P61222	P61222	ATP-binding cassette sub-family E member 1	Abce1
26.2689	25.9156	26.1903	26.1005	26.2241	26.0109	0.0359116	-0.08979	20	20	19	28.3	28.3	26.9	75.441	0	91.068	728950000	81	0.228621	0.854185	0.0870624	0.0368398	Q8VIJ6	Q8VIJ6	Splicing factor, proline- and glutamine-rich	Sfpq
26.3317	25.8263	25.9065	26.0097	25.8326	26.2389	0.00934817	0.10318	6	6	6	54.5	54.5	54.5	17.04	0	38.134	668520000	46	0.221999	0.855246	0.0883489	0.0378479	P62843	P62843	40S ribosomal protein S15	Rps15
22.7115	23.0036	23.9958	23.1377	23.176	23.5829	0.0513814	0.17231	6	6	6	14	14	14	49.639	0	17.01	109570000	18	0.246202	0.85472	0.0916638	0.0363993	Q76N33	Q76N33	AMSH-like protease	Stambpl1
24.8481	24.5961	25.3606	24.9721	25.2405	25.3418	0.426032	0.39239	11	11	9	34.6	34.6	30.8	39.355	0	85.679	437260000	41	0.25226	0.854098	0.0920777	0.0355475	P05064;A6ZI46;A6ZI47	P05064;A6ZI46	Fructose-bisphosphate aldolase A;Fructose-bisphosphate aldolase	Aldoa;Aldoart1	;
21.0692	21.3808	21.2523	20.6859	21.1287	19.6383	0.765064	-0.5664	17	2	2	74.6	23	23	13.992	0	30.785	30164000	5	0.267563	0.852308	0.0934153	0.0323156	Q8CGP2;Q64475;P10853;Q8CGP1;Q9D2U9;Q8CGP0;P70696;Q64524	Q8CGP2;Q64475;P10853;Q8CGP1;Q9D2U9;Q8CGP0;P70696;Q64524	Histone H2B type 1-P;Histone H2B type 1-B;Histone H2B type 1-F/J/L;Histone H2B type 1-K;Histone H2B type 3-A;Histone H2B type 3-B;Histone H2B type 1-A;Histone H2B type 2-E	Hist1h2bp;Hist1h2bb;Hist1h2bf;Hist1h2bk;Hist3h2ba;Hist3h2bb;Hist1h2ba;Hist2h2be	;;;;;;;
28.7392	28.2518	28.8734	28.721	28.8457	28.5929	0.185558	-0.01814	6	6	6	57.1	57.1	57.1	8.2038	0	66.661	3778500000	125	0.193364	0.851572	0.094892	0.0421511	Q9JJI8	Q9JJI8	60S ribosomal protein L38	Rpl38
27.1744	26.3433	26.8614	27.0052	26.6402	26.7701	0.0152045	-0.09122	7	5	5	37.5	30.5	30.5	14.759	0	26.124	1233000000	42	0.235627	0.849842	0.0967126	0.0394508	P67984	P67984	60S ribosomal protein L22	Rpl22
20.1853	19.7066	20.3771	20.2285	20.71	20.9281	0.862374	0.52471	1	1	1	5.4	5.4	5.4	20.52	0	2.6509	11607000	2	0.241371	0.852548	0.0968022	0.0387276	Q9CY16	Q9CY16	28S ribosomal protein S28, mitochondrial	Mrps28
23.3301	22.8028	23.7847	23.8323	23.3724	23.5012	0.345696	0.17112	5	5	5	51.4	51.4	51.4	14.957	0	31.359	133620000	17	0.24877	0.854662	0.0992255	0.0383001	P62962;CON__P02584	P62962	Profilin-1	Pfn1
23.7035	23.1422	24.1532	23.8379	24.0388	23.8615	0.340583	0.158	14	14	11	7.1	7.1	6.2	281.22	0	44.636	164460000	23	0.245145	0.85042	0.0998864	0.0391209	Q8BTM8;Q8VHX6	Q8BTM8	Filamin-A	Flna
28.2979	28.3716	27.9616	28.3268	28.295	28.2074	0.193266	-0.0028	18	7	6	37.4	19.2	16	21.977	0	53.798	3313400000	71	0.226129	0.850954	0.102992	0.042667	P43274	P43274	Histone H1.4	Hist1h1e
27.0133	26.6649	26.8093	26.8477	26.8704	27.1699	0.388318	0.06113	12	12	12	42.3	42.3	42.3	23.466	0	45.201	1265700000	61	0.220556	0.848945	0.107426	0.0447923	P84099	P84099	60S ribosomal protein L19	Rpl19
26.9615	26.4503	26.6634	26.8418	26.826	26.5604	0.105622	0.16259	21	21	16	36	36	27.5	69.289	0	120.32	1162200000	113	0.225868	0.850085	0.108734	0.0446501	Q61656	Q61656	Probable ATP-dependent RNA helicase DDX5	Ddx5
23.9467	23.6111	23.7198	24.0144	24.3017	23.3155	0.141389	0.29452	4	4	4	47.8	47.8	47.8	11.651	0	26.593	200600000	18	0.252628	0.849739	0.108952	0.0402911	P99027	P99027	60S acidic ribosomal protein P2	Rplp2
21.8774	22.7865	21.9272	22.1151	22.5441	21.4108	0.14574	0.18786	3	3	3	8.8	8.8	8.8	44.93	0	7.592	46739000	3	0.23103	0.852716	0.110024	0.0444253	Q8VE37	Q8VE37	Regulator of chromosome condensation	Rcc1
21.232	21.3672	21.9878	22.7802	21.5256	21.6611	0.426514	0.29385	13	4	4	19.7	8.7	8.7	68.542	0	16.172	56069000	6	0.260423	0.85105	0.111011	0.0387579	P26043;P26040	P26043;P26040	Radixin;Ezrin	Rdx;Ezr	;
23.5551	23.0826	23.0305	22.8327	23.2309	23.514	0.0397141	0.14826	4	4	4	31.2	31.2	31.2	16.46	0	13.537	107470000	13	0.233466	0.851207	0.111289	0.0444924	Q8BMJ3;Q60872;Q3UTA4;Q3TQZ4;M0QWL1;J3QQ02;J3QPI8;J3QP87;J3QNT6;A0A1W2P883;J3QPQ5;Q8BX20;J3QMW5;D3Z367	Q8BMJ3;Q60872;Q3UTA4;Q3TQZ4;M0QWL1;J3QQ02;J3QPI8;J3QP87;J3QNT6;A0A1W2P883	Eukaryotic translation initiation factor 1A, X-chromosomal;Eukaryotic translation initiation factor 1A	Eif1ax;Eif1a;Gm8300;Gm2016;Gm21936;Gm2056;Gm6803;Gm2035;Gm5039	;;;;;;;;;
25.6666	25.8572	25.882	25.8372	25.4388	25.9762	0.105649	-0.02	9	9	9	20.5	20.5	20.5	56.855	0	42.314	464190000	56	0.104333	0.84876	0.111461	0.0523075	Q9JI10;Q9JI11	Q9JI10	Serine/threonine-protein kinase 3;Serine/threonine-protein kinase 3 36kDa subunit;Serine/threonine-protein kinase 3 20kDa subunit	Stk3
22.0975	20.8115	22.4463	21.7717	21.9526	22.1413	0.122179	-0.14489	3	3	3	12.2	12.2	12.2	48.647	0	9.5774	38177000	4	0.231569	0.84843	0.113229	0.045388	P46471	P46471	26S protease regulatory subunit 7	Psmc2
23.8669	24.5477	24.5894	24.5725	24.2001	24.133	0.0411749	-0.34761	9	9	9	8.3	8.3	8.3	156.61	0	26.224	206690000	24	0.212426	0.849709	0.113646	0.0477957	Q6PB66	Q6PB66	Leucine-rich PPR motif-containing protein, mitochondrial	Lrpprc
20.0965	20.7632	21.7849	21.3255	21.6319	20.9321	0.320305	0.56233	3	3	3	13.4	13.4	13.4	32.191	0	11.527	28550000	13	0.25232	0.851707	0.114064	0.0417484	P17751	P17751	Triosephosphate isomerase	Tpi1
22.7925	22.2212	22.6951	22.5802	22.5435	22.8721	0.177351	-0.11491	5	5	5	8.7	8.7	8.7	51.991	0	8.5812	64904000	14	0.215685	0.848259	0.114799	0.0478676	Q62376	Q62376	U1 small nuclear ribonucleoprotein 70 kDa	Snrnp70
29.1962	28.423	28.3855	28.2022	28.8231	28.592	0.150252	0.16905	4	4	4	22.2	22.2	22.2	12.9	0	5.1206	3323600000	19	0.162877	0.847297	0.116594	0.0523609	A0A075B5X2;A0A0G2JGS9;A0A0G2JGN3;A0A0G2JEU7;A0A0A6YVW3;A0A075B5Y4;A0A075B5Y3;A0A075B5W5;P06327;A0A075B5T7;A0A075B5T4;A0A0A6YXZ4	A0A075B5X2;A0A0G2JGS9;A0A0G2JGN3;A0A0G2JEU7;A0A0A6YVW3;A0A075B5Y4;A0A075B5Y3;A0A075B5W5;P06327	Ig heavy chain V region VH558 A1/A4	Ighv1-63;Ighv1-23;Ighv1-81;Ighv1-80;Ighv1-54;Gm5629	;;;;;;;;
24.3215	23.7872	23.8832	23.9522	24.2819	24.1376	0.266097	0.25443	2	2	2	6.7	6.7	6.7	23.583	0	3.9878	153730000	9	0.175197	0.849931	0.117865	0.0521975	CON__P02666	CON__P02666
21.6041	21.2315	22.9991	23.1148	20.9149	22.1321	0.0447037	0.52806	6	6	6	16	16	16	53.12	0	16.097	78138000	12	0.26572	0.853921	0.118382	0.0385949	Q9WUM4	Q9WUM4	Coronin-1C	Coro1c
25.8185	25.4808	25.691	26.009	25.8881	25.1014	0.00295983	0.19705	8	8	6	25.5	25.5	19	45.729	0	73.316	607840000	54	0.23324	0.850309	0.120607	0.0474592	Q9Z2X1	Q9Z2X1	Heterogeneous nuclear ribonucleoprotein F;Heterogeneous nuclear ribonucleoprotein F, N-terminally processed	Hnrnpf
20.7302	20.4884	21.3897	21.2038	20.3266	21.3536	0.0773446	0.47361	1	1	1	2.5	2.5	2.5	47.66	0	3.1265	21782000	2	0.232085	0.847567	0.122416	0.0482094	Q91VZ6	Q91VZ6	Stromal membrane-associated protein 1	Smap1
25.9202	25.645	25.6538	25.6501	25.7878	26.0084	0.213165	0.13399	4	4	4	33.9	33.9	33.9	13.015	0	11.51	604860000	33	0.215382	0.849477	0.124976	0.0513922	P62855	P62855	40S ribosomal protein S26	Rps26
24.0322	23.7975	24.9625	24.6407	24.7687	23.6901	0.0729669	0.60848	7	7	2	41.9	41.9	6.4	30.2	0	19.825	293290000	21	0.249102	0.849139	0.128397	0.0463585	E9PZF0;Q01768	E9PZF0;Q01768	Nucleoside diphosphate kinase;Nucleoside diphosphate kinase B	Gm20390;Nme2	;
22.3997	21.3195	21.776	22.1404	21.4668	21.6991	0.0588442	-0.07686	2	2	2	2.8	2.8	2.8	84.939	0	19.296	34660000	11	0.199504	0.846045	0.128496	0.0543388	Q00PI9	Q00PI9	Heterogeneous nuclear ribonucleoprotein U-like protein 2	Hnrnpul2
19.7566	20.9931	20.8953	20.9544	20.5598	21.2169	0.339897	0.05913	2	2	2	2.2	2.2	2.2	138.43	0	4.7925	31652000	3	0.258029	0.853393	0.130554	0.0441551	Q8CIE6	Q8CIE6	Coatomer subunit alpha;Xenin;Proxenin	Copa
21.5856	20.8423	22.3656	22.258	21.9118	21.5004	0.233585	0.32617	2	2	2	10.6	10.6	10.6	23.461	0	4.8656	44458000	5	0.242465	0.848049	0.132649	0.0491576	P61294;P35279;Q8BHD0	P61294;P35279;Q8BHD0	Ras-related protein Rab-6B;Ras-related protein Rab-6A;Ras-related protein Rab-39A	Rab6b;Rab6a;Rab39a	;;
26.419	26.0654	27.5201	26.944	26.9674	27.0388	0.290399	0.54836	46	46	46	22.4	22.4	22.4	272.43	0	205.67	1546600000	158	0.242592	0.847367	0.134171	0.0495439	P19096	P19096	Fatty acid synthase;[Acyl-carrier-protein] S-acetyltransferase;[Acyl-carrier-protein] S-malonyltransferase;3-oxoacyl-[acyl-carrier-protein] synthase;3-oxoacyl-[acyl-carrier-protein] reductase;3-hydroxyacyl-[acyl-carrier-protein] dehydratase;Enoyl-[acyl-carrier-protein] reductase;Oleoyl-[acyl-carrier-protein] hydrolase	Fasn
25.2055	25.0405	25.9474	25.5155	25.5777	25.6879	0.277771	0.37218	7	7	5	17.8	17.8	13.6	62.277	0	80.279	535980000	22	0.225085	0.847271	0.13773	0.0541188	O08553;P97427	O08553	Dihydropyrimidinase-related protein 2	Dpysl2
20.1727	20.3683	20.4324	20.7627	20.3961	20.7456	1.02094	0.37733	2	2	2	2.1	2.1	2.1	102.45	0	3.1093	15271000	3	0.214738	0.847158	0.137851	0.0557595	O55029	O55029	Coatomer subunit beta	Copb2
24.6997	24.8458	26.1272	25.1505	25.3154	25.3011	0.0230115	0.45531	3	3	3	13.1	13.1	13.1	42.88	0	22.006	365920000	16	0.194792	0.85217	0.14421	0.0603913	Q6P3A8	Q6P3A8	2-oxoisovalerate dehydrogenase subunit beta, mitochondrial	Bckdhb
22.6795	22.0528	23.1106	22.5564	22.732	22.1922	0.128165	-0.12317	6	6	6	30.3	30.3	30.3	25.476	0	17.407	70762000	18	0.22256	0.848007	0.145241	0.0568678	Q62093	Q62093	Serine/arginine-rich splicing factor 2	Srsf2
20.2691	20.3224	20.2396	20.6897	18.6265	21.1567	0.0528362	0.42059	1	1	1	3.1	3.1	3.1	32.183	0.0024184	1.8591	14803000	3	0.242361	0.846155	0.145846	0.0527193	Q9R0Q4	Q9R0Q4	Mortality factor 4-like protein 2	Morf4l2
19.1836	20.0092	19.6391	20.1005	19.268	19.754	0.102584	0.11489	2	2	2	1.7	1.7	1.7	143.64	0.0024691	2.0861	7235600	2	0.171438	0.854328	0.14895	0.0643609	Q99KY4	Q99KY4	Cyclin-G-associated kinase	Gak
24.7848	24.4404	25.0982	24.799	24.9354	24.7775	0.11641	0.0142	15	13	13	24.7	23.1	23.1	72.421	0	55.75	335870000	35	0.216808	0.851891	0.150102	0.0593614	P20029	P20029	78 kDa glucose-regulated protein	Hspa5
23.0527	23.5018	22.7456	23.2464	23.2583	23.2138	0.251353	0.19369	6	5	5	17.2	14.8	14.8	40.092	0	14.693	96072000	18	0.198583	0.851708	0.150627	0.0621653	Q8CCK0	Q8CCK0	Core histone macro-H2A.2	H2afy2
24.5645	24.4855	24.3253	24.4149	24.4751	24.5797	0.136212	-0.01041	3	3	3	35.7	35.7	35.7	13.777	0	26.025	260890000	16	0.206437	0.85164	0.151568	0.0614323	P70349	P70349	Histidine triad nucleotide-binding protein 1	Hint1
28.3306	28.3361	29.0483	28.6165	28.7901	28.4453	0.0613136	0.28042	16	16	16	40	40	40	46.587	0	119.77	3686900000	114	0.153763	0.857628	0.152208	0.066986	O55028	O55028	[3-methyl-2-oxobutanoate dehydrogenase [lipoamide]] kinase, mitochondrial	Bckdk
21.7795	21.9087	18.5498	20.3397	21.0458	21.5123	0.0666638	-0.73373	1	1	1	3.6	3.6	3.6	32.373	0	3.7139	27120000	4	0.255823	0.84725	0.153093	0.049966	Q922W5;Q922Q4	Q922W5;Q922Q4	Pyrroline-5-carboxylate reductase 1, mitochondrial;Pyrroline-5-carboxylate reductase 2	Pycr1;Pycr2	;
23.526	23.2959	23.431	23.2973	23.4262	23.6815	0.143496	-0.00473	4	4	4	19.6	19.6	19.6	24.693	0	12.792	127790000	14	0.210603	0.853088	0.153417	0.0614119	O70251	O70251	Elongation factor 1-beta	Eef1b
25.7019	25.2014	25.3813	25.242	25.4278	25.7163	0.0582423	0.04651	7	7	7	41.7	41.7	41.7	15.809	0	20.01	413480000	45	0.147968	0.858258	0.161003	0.0708192	Q0VG62	Q0VG62	Uncharacterized protein C8orf59 homolog
24.7169	25.1869	24.7283	25.0866	25.1489	24.3832	0.00500381	0.35836	4	4	4	19.6	19.6	19.6	22.975	0	15.114	279090000	26	0.157275	0.861778	0.161717	0.0703543	CON__P02662	CON__P02662
30.3581	30.3475	30.2197	30.3442	30.3772	29.865	0.263022	-0.00328	32	32	32	44.2	44.2	44.2	79.481	0	295.03	10866000000	295	0.0806576	0.859489	0.162301	0.0752698	P51660	P51660	Peroxisomal multifunctional enzyme type 2;(3R)-hydroxyacyl-CoA dehydrogenase;Enoyl-CoA hydratase 2	Hsd17b4
24.2852	23.8214	24.658	24.3412	24.0876	24.6575	0.135094	0.05599	4	4	4	19	19	19	16.793	0	10.423	240440000	17	0.209306	0.85884	0.175068	0.0684065	Q8BGY2;P63242	Q8BGY2;P63242	Eukaryotic translation initiation factor 5A-2;Eukaryotic translation initiation factor 5A-1	Eif5a2;Eif5a	;
34.1254	33.5938	33.1957	33.3299	33.7319	33.6628	0.0751831	0.06899	4	4	4	25.1	25.1	25.1	24.409	0	44.671	110530000000	146	0.119268	0.86004	0.175193	0.0784615	CON__P00761	CON__P00761
24.8265	24.9167	24.7768	24.786	24.7368	24.9475	0.0768969	-0.04047	8	8	8	14	14	14	75.167	0	59.686	338860000	41	0.199594	0.859698	0.177262	0.0708013	Q61033	Q61033	Lamina-associated polypeptide 2, isoforms alpha/zeta	Tmpo
23.6522	23.834	25.1883	24.1389	24.277	23.8939	0.0867316	0.30488	10	10	10	25.3	25.3	25.3	51.658	0	52.609	196830000	30	0.198878	0.85794	0.178099	0.0711866	Q8VDD8	Q8VDD8	WAS protein family homolog 1	Wash1
23.4017	23.2905	24.3151	23.8457	23.6417	23.6836	0.0570282	0.28186	6	6	6	22.8	22.8	22.8	38.937	0	27.413	136610000	19	0.182821	0.860273	0.179945	0.0741858	Q9D051	Q9D051	Pyruvate dehydrogenase E1 component subunit beta, mitochondrial	Pdhb
23.8661	23.8672	23.9998	23.8132	24.3997	23.0372	0.151255	-0.05399	4	4	4	2	2	2	220.5	0	29.041	177960000	15	0.207894	0.860933	0.191841	0.0737254	P70670	P70670	Nascent polypeptide-associated complex subunit alpha, muscle-specific form	Naca
22.4888	22.1951	23.0923	23.0769	23.017	21.7173	0.00742791	0.52818	4	4	4	20.3	20.3	20.3	26.411	0	16.059	83570000	8	0.221327	0.861042	0.192296	0.0706774	Q9Z2U1	Q9Z2U1	Proteasome subunit alpha type-5	Psma5
27.308	27.5543	27.2807	27.1478	27.0749	27.7538	0.0847101	-0.16017	6	6	6	30.1	30.1	30.1	15.807	0	19.679	1708100000	70	0.163338	0.861528	0.193843	0.0814951	P62267	P62267	40S ribosomal protein S23	Rps23
24.795	24.5788	25.7534	25.0254	25.1872	24.7095	0.0612806	0.23037	12	12	12	13.4	13.4	13.4	91.349	0	31.337	347820000	44	0.181964	0.859822	0.194072	0.0790531	P22892	P22892	AP-1 complex subunit gamma-1	Ap1g1
22.9014	22.8373	23.1555	23.2908	23.3547	22.1988	0.0141715	0.38942	4	4	2	27.1	27.1	9.9	20.697	0	39.44	88239000	11	0.192818	0.859069	0.194357	0.0773874	P84078;P61205;Q8BSL7	P84078;P61205;Q8BSL7	ADP-ribosylation factor 1;ADP-ribosylation factor 3;ADP-ribosylation factor 2	Arf1;Arf3;Arf2	;;
26.7135	26.4345	27.933	27.3411	27.2251	27.2113	0.192711	0.51164	6	6	6	51.5	51.5	51.5	14.893	0	138.34	2084800000	42	0.222477	0.857416	0.197074	0.0716417	P51880	P51880	Fatty acid-binding protein, brain	Fabp7
22.6147	22.3213	21.8557	21.8128	21.9161	23.0733	0.00247292	-0.40519	4	4	4	19	19	19	27.541	0	26.311	47437000	12	0.167619	0.86364	0.200791	0.0833724	Q9CXS4	Q9CXS4	Centromere protein V	Cenpv
31.0323	30.1642	30.5543	30.5513	30.5718	30.3033	0.152019	-0.00293	3	3	3	22.3	22.3	22.3	13.264	0	46.925	13643000000	44	0.103705	0.864984	0.206336	0.0920717	A0A140T8P5;A0A140T8P7;A0A0G2JF28;A0A140T8M3;A0A0G2JE47	A0A140T8P5;A0A140T8P7;A0A0G2JF28;A0A140T8M3			;;;
24.7809	24.6455	24.9324	24.8648	24.9502	24.8038	0.393012	0.08389	7	7	2	15.4	15.4	7	49.035	0	46.188	306810000	28	0.166127	0.866147	0.206433	0.0855181	Q9Z1N5	Q9Z1N5	Spliceosome RNA helicase Ddx39b	Ddx39b
19.9001	20.0658	19.9452	20.2488	20.0922	19.5252	0.0222093	0.14702	2	2	2	6.7	6.7	6.7	36.118	0	2.2005	8425600	5	0.117476	0.866548	0.207576	0.0913703	O35459	O35459	Delta(3,5)-Delta(2,4)-dienoyl-CoA isomerase, mitochondrial	Ech1
27.8186	27.896	27.6497	27.7293	27.9706	27.1589	0.268055	-0.08931	20	20	20	36	36	36	59.125	0	95.818	1810600000	95	0.0711751	0.862601	0.208667	0.0955017	P32020	P32020	Non-specific lipid-transfer protein	Scp2
21.5333	22.3039	23.5987	22.6216	22.7819	22.3757	0.0648722	0.31771	5	4	4	5.2	4.5	4.5	105.73	0	10.193	69452000	17	0.205838	0.85847	0.208817	0.0791268	Q3V3R1	Q3V3R1	Monofunctional C1-tetrahydrofolate synthase, mitochondrial	Mthfd1l
23.3913	23.3961	23.9569	23.9551	23.9322	23.1769	0.12289	0.53609	5	5	5	49	49	49	10.963	0	10.674	131250000	16	0.169	0.86828	0.213461	0.0874873	Q64433	Q64433	10 kDa heat shock protein, mitochondrial	Hspe1
21.9864	22.5644	22.5684	22.6704	22.5816	22.5222	0.478692	0.01725	4	4	4	15.3	15.3	15.3	26.925	0	2.5383	66948000	5	0.190942	0.863059	0.213471	0.0837029	O88983	O88983	Syntaxin-8	Stx8
22.2609	21.8902	21.8627	21.9281	21.9559	22.3315	0.135669	0.06562	2	2	2	27.6	27.6	27.6	8.4977	0	3.8413	38973000	10	0.122623	0.863949	0.214938	0.0937045	Q9D115	Q9D115	Zinc finger protein 706	Znf706
18.5576	21.0255	20.4705	20.8405	19.4249	19.6131	0.0224205	-0.85744	1	1	1	1.4	1.4	1.4	128.62	0	3.2606	11918000	1	0.223901	0.85949	0.216233	0.0761143	Q8R0G9	Q8R0G9	Nuclear pore complex protein Nup133	Nup133
29.4157	29.2515	29.9272	29.5707	29.5839	29.2637	0.091474	0.15495	35	35	32	46.1	46.1	43.3	70.87	0	323.31	8582700000	327	0.18034	0.867083	0.219956	0.0877323	P63017;P17156;Q61696;P16627;P17879	P63017	Heat shock cognate 71 kDa protein	Hspa8
23.3848	22.5618	23.0098	22.8526	23.131	23.15	0.0813004	0.12119	2	2	2	31.3	31.3	31.3	11.549	0	8.909	87723000	1	0.164897	0.865275	0.223261	0.0914076	Q9DAM7	Q9DAM7	Transmembrane protein 263	Tmem263
22.4443	22.1747	22.3701	22.5127	22.2983	22.1647	0.0114429	-0.0718	7	2	2	19.6	4.5	4.5	49.199	0	5.0574	52816000	12	0.147159	0.862073	0.223697	0.0941008	O35737	O35737	Heterogeneous nuclear ribonucleoprotein H;Heterogeneous nuclear ribonucleoprotein H, N-terminally processed	Hnrnph1
28.3427	28.4291	28.6474	28.6569	28.7759	27.6954	0.0981921	0.22784	24	24	24	46.3	46.3	46.3	59.795	0	266.16	3432200000	191	0.14009	0.863975	0.225019	0.0954797	P24270	P24270	Catalase	Cat
22.7609	22.4117	23.5837	22.8651	23.1073	22.6301	0.0469584	0.10421	3	3	3	20.9	20.9	20.9	18.733	0	59.212	83619000	17	0.175395	0.86568	0.225161	0.0902836	P61967	P61967	AP-1 complex subunit sigma-1A	Ap1s1
24.6445	24.1444	24.3385	24.499	24.2317	24.1355	0.182533	-0.10676	8	7	4	21.4	19.2	10	49.279	0	46.104	204070000	22	0.130224	0.859369	0.227147	0.0974476	P70333	P70333	Heterogeneous nuclear ribonucleoprotein H2	Hnrnph2
25.2003	24.8536	25.3241	25.1764	25.1506	25.1903	0.119888	-0.02392	5	5	5	26.5	26.5	26.5	14.525	0	10.957	447160000	24	0.186717	0.866602	0.231265	0.0899949	P63323	P63323	40S ribosomal protein S12	Rps12
26.9548	26.5377	26.8554	26.9003	26.7457	26.3729	0.21178	-0.10969	12	12	1	41.5	41.5	3.9	37.14	0	169.04	1157900000	85	0.150792	0.860544	0.232052	0.0965227	J3QNY1;B2RXM2;V9GX38	J3QNY1;B2RXM2		Gm9242;Gm6793	;
24.8947	24.3235	24.9552	24.723	24.7963	24.4979	0.0836118	-0.17165	7	4	4	31.8	22	22	27.771	0	81.309	302020000	25	0.171403	0.863144	0.234491	0.093999	P63101	P63101	14-3-3 protein zeta/delta	Ywhaz
21.003	22.2891	22.2576	22.1403	22.2581	21.805	0.187184	-0.11729	2	2	2	16.6	16.6	16.6	18.974	0	3.0626	35466000	5	0.161195	0.860653	0.234805	0.0958578	CON__P02668	CON__P02668
31.8614	31.7304	31.3095	31.4864	31.4072	31.3804	0.545543	-0.32325	17	17	2	74.6	74.6	17.5	13.906	0	204.57	33835000000	167	0.164171	0.861619	0.235754	0.0956772	Q6ZWY9;Q64525;Q64478;P10854	Q6ZWY9;Q64525;Q64478;P10854	Histone H2B type 1-C/E/G;Histone H2B type 2-B;Histone H2B type 1-H;Histone H2B type 1-M	Hist1h2bc;Hist2h2bb;Hist1h2bh;Hist1h2bm	;;;
22.5796	22.3231	22.9844	22.6329	22.4815	22.6012	0.103995	0.02159	4	4	4	10	10	10	59.406	0	15.304	73450000	16	0.177953	0.866048	0.236209	0.0933048	Q8VH51	Q8VH51	RNA-binding protein 39	Rbm39
25.9741	25.9598	26.3143	25.9759	26.0441	26.3228	0.0702632	0.07002	8	8	8	56.6	56.6	56.6	15.874	0	48.29	636400000	46	0.0974345	0.85292	0.236244	0.104441	Q9D1I6	Q9D1I6	39S ribosomal protein L14, mitochondrial	Mrpl14
22.8751	22.5482	23.1811	22.5143	22.8652	22.6973	0.349358	-0.17782	4	4	3	14.1	14.1	11.3	27.744	0	5.2782	73451000	11	0.146076	0.858799	0.23625	0.0986599	Q6PDM2	Q6PDM2	Serine/arginine-rich splicing factor 1	Srsf1
22.7744	22.477	23.0483	22.7038	22.8118	22.3808	0.254635	-0.07062	5	5	5	6.3	6.3	6.3	135.55	0	17.155	66329000	10	0.129336	0.855389	0.23705	0.101182	Q921M3	Q921M3	Splicing factor 3B subunit 3	Sf3b3
21.6925	23.029	22.2159	21.8464	21.7964	22.4211	0.265972	-0.36954	7	2	2	54.6	12.3	12.3	14.013	0	3.0516	44930000	8	0.143594	0.856962	0.240539	0.100513	Q64522	Q64522	Histone H2A type 2-B	Hist2h2ab
28.9726	28.8875	29.6844	29.1993	29.123	28.6062	0.260612	0.15045	18	18	18	74.5	74.5	74.5	16.085	0	117.41	5907300000	141	0.156432	0.857651	0.240998	0.0987052	Q9CZX8	Q9CZX8	40S ribosomal protein S19	Rps19
28.3506	27.9144	27.8875	27.9933	27.8035	28.0695	0.219099	0.07884	10	10	10	48.1	48.1	48.1	17.951	0	110.19	2428700000	159	0.0873541	0.851462	0.242516	0.107921	P62983;A0A0A6YW67;P62984;P0CG49;P0CG50;D3YYZ2	P62983;A0A0A6YW67;P62984;P0CG49;P0CG50	Ubiquitin-40S ribosomal protein S27a;Ubiquitin;40S ribosomal protein S27a;Ubiquitin-60S ribosomal protein L40;Ubiquitin;60S ribosomal protein L40;Polyubiquitin-B;Ubiquitin;Polyubiquitin-C;Ubiquitin;Ubiquitin-related 1;Ubiquitin-related 2	Rps27a;Gm8797;Uba52;Ubb;Ubc	;;;;
24.5271	24.7595	25.1347	24.6814	24.7188	24.4487	0.413646	-0.07806	12	12	12	17.4	17.4	17.4	87.265	0	34.065	262150000	35	0.114807	0.852869	0.242939	0.105117	Q9Z110	Q9Z110	Delta-1-pyrroline-5-carboxylate synthase;Glutamate 5-kinase;Gamma-glutamyl phosphate reductase	Aldh18a1
31.3356	31.0054	31.3849	31.1647	31.1621	31.346	0.0453118	-0.17094	19	19	19	71.2	71.2	71.2	16.445	0	96.897	22945000000	215	0.0944555	0.85062	0.244748	0.108068	P14131	P14131	40S ribosomal protein S16	Rps16
18.3411	20.0534	21.5502	21.1344	19.821	20.2383	0.154972	0.18487	4	4	4	15.5	15.5	15.5	37.984	0	12.049	27964000	4	0.242851	0.858844	0.244846	0.07423	Q9DCH4	Q9DCH4	Eukaryotic translation initiation factor 3 subunit F	Eif3f
28.921	28.6755	29.523	28.8332	28.8148	28.8781	0.321386	-0.0878	44	44	44	44.2	44.2	44.2	132.96	0	323.31	4924300000	296	0.118621	0.851674	0.246657	0.10604	Q6P9Q6	Q6P9Q6	FK506-binding protein 15	Fkbp15
24.3515	24.3779	24.0865	23.9257	23.647	23.9504	1.48343	-0.42581	4	4	4	39.7	39.7	39.7	26.268	0	26.396	169780000	13	0.111061	0.847495	0.251286	0.108688	P51859	P51859	Hepatoma-derived growth factor	Hdgf
23.841	22.6024	23.3048	22.917	23.2549	23.5095	0.0185992	-0.04986	3	3	3	14.1	14.1	14.1	21.45	0	10.351	106690000	9	0.167296	0.858053	0.251415	0.100175	P63001;Q05144	P63001	Ras-related C3 botulinum toxin substrate 1	Rac1
21.8004	21.574	22.572	21.8431	21.9525	21.6369	0.210109	0.04266	4	4	4	23.9	23.9	23.9	25.97	0	8.8652	47696000	10	0.184107	0.859368	0.251459	0.0966133	P10649;F6Y363;Q8R5I6;Q80W21;P15626;P48774	P10649;F6Y363;Q8R5I6;Q80W21;P15626	Glutathione S-transferase Mu 1;Glutathione S-transferase Mu 7;Glutathione S-transferase Mu 2	Gstm1;Gm6665;Gstm4;Gstm7;Gstm2	;;;;
24.8777	24.9597	24.9129	24.9587	24.9379	24.4538	0.329282	0.025	8	8	8	23.5	23.5	23.5	43.267	0	71.961	255860000	37	0.0419226	0.853122	0.252141	0.116302	Q9WUR2;Q78JN3	Q9WUR2;Q78JN3	Enoyl-CoA delta isomerase 2, mitochondrial	Eci2;Eci3	;
25.7447	26.5356	25.6588	25.977	25.5677	26.1073	0.106975	0.23231	5	5	5	30.5	30.5	30.5	12.256	0	19.118	766080000	49	0.172408	0.857749	0.252451	0.0994788	A0A140T8K6;P47964;D3YX71	A0A140T8K6;P47964	60S ribosomal protein L36	Rpl36	;
26.1623	26.2794	25.6028	25.9599	25.8422	25.8513	0.242411	-0.31099	17	3	3	40.3	9.5	9.5	22.099	0	39.288	707150000	30	0.140049	0.852418	0.253723	0.105626	P43277	P43277	Histone H1.3	Hist1h1d
17.8269	22.7165	21.5643	21.2789	21.8053	21.5856	0.224979	0.02129	1	1	1	2.4	2.4	2.4	76.869	0	4.1568	25948000	5	0.241449	0.858995	0.254015	0.076678	P98192	P98192	Dihydroxyacetone phosphate acyltransferase	Gnpat
31.1384	30.9414	30.921	30.623	30.7022	31.0276	0.693409	-0.23917	1	1	1	0.5	0.5	0.5	146.41	0.0023613	1.6559	16908000000	17	0.0273305	0.850413	0.255187	0.119147	E9Q3S4	E9Q3S4	Mitogen-activated protein kinase kinase kinase 19	Map3k19
23.6116	23.6683	24.0446	23.74	23.9722	23.4733	0.0827111	0.07167	6	6	6	15.8	15.8	15.8	55.983	0	23.407	155850000	11	0.159185	0.853607	0.258757	0.104075	Q8BK67	Q8BK67	Protein RCC2	Rcc2
24.103	24.1442	23.7644	23.9342	23.9083	23.7103	0.47529	-0.19472	10	10	10	19.7	19.7	19.7	59.696	0	26.784	168100000	26	0.141358	0.846258	0.263322	0.108718	Q99JF8	Q99JF8	PC4 and SFRS1-interacting protein	Psip1
22.6839	21.6465	22.3259	22.1631	22.14	22.4836	0.0458648	-0.16288	13	3	3	31.5	11.6	11.6	50.09	0	9.8688	60126000	7	0.179367	0.852558	0.265474	0.101868	Q922F4	Q922F4	Tubulin beta-6 chain	Tubb6
21.6693	21.2684	21.9478	21.1732	21.6197	21.3259	0.46715	-0.34342	2	2	2	5.4	5.4	5.4	23.596	0	2.3101	48860000	3	0.209489	0.864859	0.266362	0.093368	P34022	P34022	Ran-specific GTPase-activating protein	Ranbp1
20.0253	19.6544	20.7495	20.843	20.1181	19.059	0.0788546	0.09281	1	1	1	7.3	7.3	7.3	12.405	0.0077519	1.3523	12866000	1	0.187816	0.852907	0.271208	0.101348	P83870	P83870	PHD finger-like domain-containing protein 5A	Phf5a
29.9967	29.7513	29.2616	29.4032	29.4005	29.2773	0.634066	-0.35082	17	17	17	52.6	52.6	52.6	43.953	0	177.66	6187100000	179	0.0311924	0.852628	0.271457	0.125733	Q921H8;Q8VCH0	Q921H8;Q8VCH0	3-ketoacyl-CoA thiolase A, peroxisomal;3-ketoacyl-CoA thiolase B, peroxisomal	Acaa1a;Acaa1b	;
23.3047	22.6293	23.9186	23.4477	23.3655	22.311	0.176486	0.0608	5	5	5	19.5	19.5	19.5	31.345	0	34.899	102760000	17	0.166838	0.852159	0.274869	0.107586	P47757	P47757	F-actin-capping protein subunit beta	Capzb
21.3511	22.6163	22.7757	22.7424	22.4597	21.7301	0.0395144	-0.15654	2	2	2	7.4	7.4	7.4	40.528	0	10.229	44611000	6	0.144085	0.849646	0.276545	0.112696	Q8BGC4	Q8BGC4	Zinc-binding alcohol dehydrogenase domain-containing protein 2	Zadh2
19.7381	19.9981	20.9809	20.2205	20.3031	19.6255	0.163976	0.22235	1	1	1	4.6	4.6	4.6	29.546	0.0023447	1.5617	13438000	1	0.195472	0.854059	0.279088	0.101247	Q9R1P4	Q9R1P4	Proteasome subunit alpha type-1	Psma1
29.8142	30.2924	29.7307	29.44	29.7331	29.8554	0.558706	-0.08114	21	21	21	66.2	66.2	66.2	24.077	0	75.185	9778800000	193	0.132154	0.85371	0.279861	0.115909	E9QAZ2;Q9CZM2	E9QAZ2;Q9CZM2	Ribosomal protein L15;60S ribosomal protein L15	Gm10020;Rpl15	;
23.1898	22.7444	24.1417	23.2686	23.2005	23.1549	0.13429	0.01074	3	3	3	23.8	23.8	23.8	19.895	0	25.133	140990000	11	0.191273	0.853529	0.281943	0.103295	Q6ZWQ9;Q3THE2;Q9CQ19	Q6ZWQ9;Q3THE2	Myosin regulatory light chain 12B	Myl12a;Myl12b	;
29.5178	29.1865	30.1136	29.7288	29.6943	29.7435	0.160673	0.21101	24	24	9	61.3	61.3	32.3	41.792	0	239.77	10020000000	239	0.167436	0.84643	0.28231	0.109714	P63260;P60710;Q8BFZ3;V9GXQ2;E9Q3M9	P63260;P60710	Actin, cytoplasmic 2;Actin, cytoplasmic 2, N-terminally processed;Actin, cytoplasmic 1;Actin, cytoplasmic 1, N-terminally processed	Actg1;Actb	;
19.3704	19.7337	20.9264	19.06	18.8622	21.0773	0.15086	-0.67364	1	1	1	1.6	1.6	1.6	82.669	0	6.4861	11592000	3	0.206755	0.85949	0.282794	0.0983572	Q8BMS1	Q8BMS1	Trifunctional enzyme subunit alpha, mitochondrial;Long-chain enoyl-CoA hydratase;Long chain 3-hydroxyacyl-CoA dehydrogenase	Hadha
24.171	24.2295	24.6591	24.14	24.2777	23.9498	0.566838	-0.08948	4	4	4	14.8	14.8	14.8	25.171	0	7.5329	241790000	25	0.102261	0.850957	0.283834	0.121942	Q6IRU5	Q6IRU5	Clathrin light chain B	Cltb
21.6319	20.4159	22.359	21.2722	21.8778	21.2194	0.00676274	-0.35973	8	2	2	35.8	7.7	7.7	32.994	0	4.1613	44160000	5	0.203177	0.856724	0.288982	0.101169	P21107;P58771	P21107;P58771	Tropomyosin alpha-3 chain;Tropomyosin alpha-1 chain	Tpm3;Tpm1	;
22.11	18.4815	22.8045	19.0655	22.0582	21.9957	0.0184129	-0.11423	1	1	1	2.4	2.4	2.4	36.98	0.0077434	1.3497	31691000	2	0.231843	0.866662	0.289046	0.0884379	E9PWI5	E9PWI5	Olfactory receptor	Olfr543
23.1666	22.3275	22.8789	22.9234	22.9342	22.3665	0.0553554	0.04446	2	2	2	8	8	8	40.703	0	3.3324	64925000	3	0.0989713	0.853016	0.289374	0.124461	O35226	O35226	26S proteasome non-ATPase regulatory subunit 4	Psmd4
22.0836	23.286	21.3852	22.6308	18.4356	24.3896	0.0827124	0.54729	2	2	2	24.4	24.4	24.4	9.4226	0	3.31	58980000	5	0.233035	0.866768	0.297332	0.0892901	P09602;J3QM43	P09602;J3QM43	Non-histone chromosomal protein HMG-17	Hmgn2;Gm6594	;
25.1062	24.8849	25.1621	24.7671	25.0333	24.4961	0.741576	-0.33907	6	6	5	30.6	30.6	21.9	20.855	0	31.617	358360000	42	0.149086	0.853149	0.297417	0.118486	P23198	P23198	Chromobox protein homolog 3	Cbx3
25.8227	25.542	26.3158	25.8893	25.9166	25.5196	0.172395	0.06653	14	14	14	41.6	41.6	41.6	48.542	0	65.11	587940000	66	0.110433	0.853012	0.300064	0.126577	P35585;Q9WVP1	P35585	AP-1 complex subunit mu-1	Ap1m1
19.4595	17.5946	20.0461	19.6732	18.6406	19.6068	0.123274	0.14727	1	1	1	11.1	11.1	11.1	15.261	0.0034483	1.4786	6599500	2	0.197774	0.849378	0.309428	0.108156	Q9CQN7	Q9CQN7	39S ribosomal protein L41, mitochondrial	Mrpl41
20.1334	20.2902	19.5984	18.2379	20.6628	20.4393	0.101938	0.30584	1	1	1	5.7	5.7	5.7	18.192	0.002448	1.9764	13620000	2	0.201261	0.848414	0.316183	0.10843	Q9D358	Q9D358	Low molecular weight phosphotyrosine protein phosphatase	Acp1
26.08	25.9287	26.276	26.3391	26.2067	25.2542	0.171577	0.1267	12	12	12	38.6	38.6	38.6	30.831	0	67.01	844450000	54	0.165256	0.851061	0.31622	0.120289	Q99020	Q99020	Heterogeneous nuclear ribonucleoprotein A/B	Hnrnpab
20.0445	19.2457	19.509	20.5493	18.1677	18.3387	0.29336	-1.17026	1	1	1	3.4	3.4	3.4	46.638	0	2.7673	9262200	1	0.206654	0.850724	0.316702	0.106315	O54941	O54941	SWI/SNF-related matrix-associated actin-dependent regulator of chromatin subfamily E member 1	Smarce1
22.6923	21.1297	22.953	21.8812	22.1266	21.4729	0.290613	-0.81112	2	2	2	6.5	6.5	6.5	23.656	0	2.6002	52384000	5	0.172285	0.851976	0.316975	0.118523	P27048;P63163	P27048;P63163	Small nuclear ribonucleoprotein-associated protein B;Small nuclear ribonucleoprotein-associated protein N	Snrpb;Snrpn	;
20.1248	20.013	20.8715	19.5375	20.7345	20.4847	0.0646137	0.35996	2	2	2	8.5	8.5	8.5	33.541	0	3.8823	13500000	3	0.138462	0.852495	0.320674	0.128204	Q9CPR5	Q9CPR5	39S ribosomal protein L15, mitochondrial	Mrpl15
23.341	23.1962	23.3596	22.9526	22.6209	23.1578	1.10878	-0.38834	5	5	5	23.7	23.7	23.7	26.713	0	17.291	86655000	14	0.0795323	0.865335	0.328254	0.141918	O88384	O88384	Vesicle transport through interaction with t-SNAREs homolog 1B	Vti1b
23.4483	23.5644	24.3718	24.0094	24.0684	23.6102	0.1132	0.44499	7	7	7	20.8	20.8	20.8	36.498	0	37.49	221370000	22	0.181349	0.851028	0.328309	0.118746	P06151;P00342	P06151	L-lactate dehydrogenase A chain	Ldha
22.1782	21.7593	22.9076	22.7449	22.4245	21.7732	0.0246675	0.24622	2	2	2	7.3	7.3	7.3	40.489	0	5.9412	59812000	3	0.155046	0.852484	0.329651	0.126961	P08752;P20612;Q9DC51;Q3V3I2;P50149;P18872;B2RSH2;Q8CGK7;Q6R0H7	P08752;P20612;Q9DC51;Q3V3I2;P50149;P18872;B2RSH2;Q8CGK7;Q6R0H7	Guanine nucleotide-binding protein G(i) subunit alpha-2;Guanine nucleotide-binding protein G(t) subunit alpha-1;Guanine nucleotide-binding protein G(k) subunit alpha;Guanine nucleotide-binding protein G(t) subunit alpha-3;Guanine nucleotide-binding protein G(t) subunit alpha-2;Guanine nucleotide-binding protein G(o) subunit alpha;Guanine nucleotide-binding protein G(i) subunit alpha-1;Guanine nuc…	Gnai2;Gnat1;Gnai3;Gnat3;Gnat2;Gnao1;Gnai1;Gnal;Gnas	;;;;;;;;
24.0824	23.4656	23.7876	24.0278	23.6482	23.274	0.17302	-0.13933	4	4	4	14.1	14.1	14.1	52.673	0	18.652	151110000	17	0.132125	0.855414	0.33214	0.133293	P56959	P56959	RNA-binding protein FUS	Fus
23.1758	20.9206	23.6119	22.7837	22.6401	21.45	0.107424	-0.53574	7	1	1	9.1	2.3	2.3	57.865	0	33.303	173710000	29	0.176408	0.851218	0.332636	0.121529	CON__Q7RTS7;CON__Q32MB2;CON__Q3SY84;CON__Q14CN4-1;CON__Q6IME9;Q6IME9	CON__Q7RTS7;CON__Q32MB2;CON__Q3SY84;CON__Q14CN4-1;CON__Q6IME9;Q6IME9	Keratin, type II cytoskeletal 72	Krt72	;;;;;
22.7598	22.5907	22.4012	22.4505	22.5999	21.6301	0.487661	-0.14021	4	4	4	16.3	16.3	16.3	33.665	0	9.0033	60844000	15	0.130872	0.857702	0.338737	0.135697	P62996;Q6PFR5	P62996	Transformer-2 protein homolog beta	Tra2b
23.81	23.2018	23.6933	23.6425	23.7731	21.842	0.301589	-0.05077	7	2	2	17.4	9.6	9.6	47.655	0	28.714	141100000	7	0.180398	0.849905	0.33989	0.122082	Q60972	Q60972	Histone-binding protein RBBP4	Rbbp4
27.955	28.0824	29.2833	28.414	28.2627	28.2837	0.101402	0.20127	24	24	24	52.9	52.9	52.9	50.37	0	255.33	3472300000	139	0.108583	0.864879	0.3452	0.142652	P50136	P50136	2-oxoisovalerate dehydrogenase subunit alpha, mitochondrial	Bckdha
21.7995	22.1228	21.6011	21.9019	22.0942	20.9212	0.197294	0.10247	2	2	2	2.9	2.9	2.9	68.932	0.002451	2.0069	39030000	7	0.134823	0.861419	0.350812	0.138577	CON__Q32PI4	CON__Q32PI4
22.6606	23.3009	24.0722	23.529	23.3008	22.6014	0.151605	-0.00014	4	4	4	11.6	11.6	11.6	47.907	0	11.806	101670000	5	0.121223	0.865698	0.357134	0.143862	P51174	P51174	Long-chain specific acyl-CoA dehydrogenase, mitochondrial	Acadl
22.2434	19.4256	20.2708	20.2966	21.3371	18.7207	0.177717	0.02577	1	1	1	2.4	2.4	2.4	60.342	0	5.0863	16725000	4	0.188133	0.852231	0.362162	0.124635	Q6DFW4	Q6DFW4	Nucleolar protein 58	Nop58
25.2445	25.1736	24.695	24.6243	24.799	24.7943	0.75413	-0.37928	4	4	4	30.4	30.4	30.4	11.952	0	11.232	254750000	24	0.00853142	0.882545	0.363634	0.170073	Q9CQF8	Q9CQF8	Ribosomal protein 63, mitochondrial	Mrpl57
22.0823	21.6187	22.7821	22.0113	22.5233	21.0086	0.218277	-0.07099	4	4	4	16.5	16.5	16.5	28.785	0	28.897	65912000	13	0.18301	0.852407	0.36542	0.127504	A0A140T8V5;P17918	A0A140T8V5;P17918	Proliferating cell nuclear antigen	Pcna	;
23.0321	22.7669	23.0455	22.7958	22.899	22.2289	0.605416	-0.23631	5	5	5	26.1	26.1	26.1	31.835	0	19.427	82451000	13	0.122985	0.869704	0.371198	0.147952	Q62189;F8VQ88	Q62189	U1 small nuclear ribonucleoprotein A	Snrpa
22.3601	22.6179	23.4591	22.5877	22.6661	22.9286	0.086762	0.04815	4	4	4	15.9	15.9	15.9	41.297	0	23.506	82885000	11	0.133623	0.867321	0.373713	0.145955	Q8CAY6;Q80X81	Q8CAY6;Q80X81	Acetyl-CoA acetyltransferase, cytosolic	Acat2;Acat3	;
31.37	31.0777	30.6057	30.5621	30.7894	30.5727	0.735202	-0.50497	19	19	19	64.7	64.7	64.7	15.388	0	56.565	20189000000	118	0.0940683	0.878058	0.374821	0.155905	P84228;P68433;P84244;P02301	P84228;P68433;P84244;P02301	Histone H3.2;Histone H3.1;Histone H3.3;Histone H3.3C	Hist1h3b;Hist1h3a;H3f3a;H3f3c	;;;
29.4318	28.132	28.5051	28.4739	28.7313	28.4236	0.136028	-0.03116	5	5	5	53.6	53.6	53.6	6.6767	0	66.84	3629400000	43	0.0719173	0.88278	0.376744	0.161268	P62274;D3YYL7	P62274;D3YYL7	40S ribosomal protein S29	Rps29;Gm10126	;
17.7276	20.0621	20.4119	18.0475	19.6716	19.4072	0.134665	-0.65496	2	2	2	6	6	6	38.907	0	3.391	11383000	2	0.209042	0.853699	0.377401	0.11788	Q07646	Q07646	Mesoderm-specific transcript protein	Mest
24.6921	23.8812	24.1147	24.7166	23.9859	23.1766	0.20602	-0.12876	8	8	8	10.1	10.1	10.1	93.55	0	21.495	198780000	29	0.130535	0.870559	0.382227	0.149401	Q9JIK5	Q9JIK5	Nucleolar RNA helicase 2	Ddx21
20.0699	19.6742	20.1548	19.7165	19.744	19.0757	0.795255	-0.35337	1	1	1	2.6	2.6	2.6	39.234	0.0023529	1.6384	5089600	2	0.0698723	0.882602	0.382663	0.163862	CON__P00978;Q07456	CON__P00978;Q07456	Protein AMBP;Alpha-1-microglobulin;Inter-alpha-trypsin inhibitor light chain;Trypstatin	Ambp	;
29.2128	28.9723	29.3518	28.725	28.8312	28.8661	1.45354	-0.3816	11	11	11	54.4	54.4	54.4	13.742	0	75.037	5102300000	75	0.0537304	0.886747	0.38383	0.167668	P62852	P62852	40S ribosomal protein S25	Rps25
27.8258	25.7835	26.8618	26.4293	26.3658	26.2095	0.340666	-0.49605	20	20	20	23.3	23.3	23.3	282.39	0	299.57	908790000	132	0.0979782	0.881741	0.389402	0.159999	CON__Q86YZ3	CON__Q86YZ3
29.9035	27.6968	29.3486	28.8615	28.7034	28.5203	0.16145	-0.64522	42	30	5	51.5	40.8	7.1	62.378	0	323.31	4836600000	211	0.117746	0.882425	0.411494	0.162003	CON__P13647;Q99M73;CON__H-INV:HIT000016045;CON__H-INV:HIT000292931	CON__P13647
20.2951	17.7147	21.2648	20.037	19.909	18.3433	0.098863	-0.38613	3	2	1	10.8	6.5	3.1	36.983	0	5.0217	14909000	5	0.202072	0.852829	0.415755	0.129275	P63087	P63087	Serine/threonine-protein phosphatase PP1-gamma catalytic subunit	Ppp1cc
23.9341	24.0552	24.331	24.3885	24.1514	23.253	0.18344	0.09628	5	5	5	19.5	19.5	19.5	36.511	0	26.332	157680000	24	0.0680007	0.881873	0.417439	0.176907	P14152	P14152	Malate dehydrogenase, cytoplasmic	Mdh1
21.0999	18.3405	21.3816	20.9883	20.6935	18.941	0.0190218	-0.40642	2	2	2	27	27	27	10.366	0	2.6057	22822000	2	0.199212	0.855413	0.420022	0.131745	P63168;Q9D0M5	P63168;Q9D0M5	Dynein light chain 1, cytoplasmic;Dynein light chain 2, cytoplasmic	Dynll1;Dynll2	;
24.7862	24.4084	24.3213	23.6996	24.3736	24.4421	0.53125	-0.03482	6	6	6	36.7	36.7	36.7	14.92	0	23.246	201630000	33	0.0235291	0.890008	0.423391	0.190521	Q9CR88	Q9CR88	28S ribosomal protein S14, mitochondrial	Mrps14
28.5588	28.6795	28.7062	28.3761	28.3792	28.0306	1.44423	-0.30344	50	50	43	67.2	67.2	59.9	66.785	0	269.87	4385200000	287	0.113185	0.883567	0.42707	0.168161	P14733	P14733	Lamin-B1	Lmnb1
29.3925	29.2624	29.0285	29.3781	29.0446	28.5427	0.379189	-0.21777	12	12	12	59.4	59.4	59.4	19.784	0	115.22	4913600000	122	0.0262719	0.891384	0.432796	0.193487	Q9CXZ1	Q9CXZ1	NADH dehydrogenase [ubiquinone] iron-sulfur protein 4, mitochondrial	Ndufs4
18.6092	19.859	21.5556	18.3825	18.5267	21.6194	0.135393	-1.33225	2	2	2	2.9	2.9	2.9	87.021	0	2.8735	16915000	3	0.203569	0.854188	0.433762	0.131782	P52479	P52479	Ubiquitin carboxyl-terminal hydrolase 10	Usp10
22.5698	23.3901	22.4521	22.6058	22.8947	22.2912	0.237462	0.03607	3	3	3	8.5	8.5	8.5	71.439	0	3.4729	75252000	7	0.101103	0.882637	0.442153	0.176474	Q3U9G9	Q3U9G9	Lamin-B receptor	Lbr
27.3451	27.337	26.632	27.0277	26.8467	26.1252	0.531574	-0.49024	26	26	26	42.7	42.7	42.7	74.648	0	194.42	1066500000	133	0.0337387	0.890055	0.442803	0.195245	Q9R0H0	Q9R0H0	Peroxisomal acyl-coenzyme A oxidase 1	Acox1
32.532	32.0709	31.948	31.9487	32.1087	31.5409	0.576406	-0.12215	9	9	9	57.5	57.5	57.5	11.778	0	137.8	38610000000	171	0.0238911	0.89096	0.443435	0.198483	P01837;CON__Q05B55	P01837	Ig kappa chain C region
25.3988	24.6928	25.4745	25.0754	24.8261	24.8612	0.440648	-0.5376	11	11	5	53.2	53.2	21	28.991	0	149.29	464480000	43	0.12202	0.88128	0.445191	0.170869	D3Z2H9;CON__Q3SX28;P58774	D3Z2H9		Tpm3-rs7
24.2362	23.343	24.4256	23.8296	23.7113	23.71	0.304275	-0.52488	3	3	3	15.7	15.7	15.7	32.523	0	20.052	148920000	15	0.0639818	0.890404	0.448316	0.188972	Q9WTP2	Q9WTP2	Protein sprouty homolog 4	Spry4
24.3424	24.1069	25.1658	24.2249	24.2307	24.1265	0.460759	-0.11759	9	9	9	17	17	17	65.696	0	26.482	228630000	44	0.0842935	0.886987	0.451191	0.184303	Q9WUA2	Q9WUA2	Phenylalanine--tRNA ligase beta subunit	Farsb
22.9847	23.0829	23.7026	23.337	23.3225	22.1178	0.289323	0.23963	3	3	3	19.3	19.3	19.3	14.866	0	17.179	111980000	8	0.129087	0.881799	0.451986	0.170415	P16045	P16045	Galectin-1	Lgals1
25.1881	25.0293	26.5014	25.8663	25.5805	24.669	0.124661	0.39246	17	2	2	33.2	7.2	7.2	42.051	0	17.67	667030000	13	0.150963	0.882043	0.453667	0.162531	P68134;P68033;P63268;P62737	P68134;P68033;P63268;P62737	Actin, alpha skeletal muscle;Actin, alpha cardiac muscle 1;Actin, gamma-enteric smooth muscle;Actin, aortic smooth muscle	Acta1;Actc1;Actg2;Acta2	;;;
20.9001	20.4972	21.3976	20.4918	20.3028	21.1072	0.346644	-0.40835	1	1	1	1.8	1.8	1.8	75.829	0	2.57	16102000	4	0.0420421	0.890909	0.454757	0.197431	CON__Q29443;CON__Q0IIK2	CON__Q29443;CON__Q0IIK2			;
26.1166	25.8921	26.7364	25.9525	26.0036	25.961	0.472844	-0.15554	34	34	25	49.9	49.9	38.8	67.766	0	107.84	947060000	111	0.12559	0.881864	0.457851	0.173326	P26041	P26041	Moesin	Msn
20.1053	18.7097	20.7674	21.1805	19.6214	20.4964	0.308595	0.39105	2	1	1	11.6	6.5	6.5	23.598	0	3.0494	10775000	1	0.163653	0.881962	0.462486	0.159152	Q9CQD1	Q9CQD1	Ras-related protein Rab-5A	Rab5a
22.8009	22.6772	23.2429	22.63	22.1274	22.8422	0.615356	-0.17089	4	4	4	8.1	8.1	8.1	57.598	0	6.6457	76148000	13	0.0896815	0.889218	0.463758	0.186847	Q8C0C7	Q8C0C7	Phenylalanine--tRNA ligase alpha subunit	Farsa
29.7879	27.3354	29.3045	28.6821	28.7218	27.6843	0.21017	-0.6224	32	26	6	51.9	46.6	18.2	51.621	0	236.65	4434600000	205	0.127755	0.8822	0.466034	0.17487	CON__P02533;Q61781;CON__Q61782;CON__P08727;CON__Q9D312;Q9D312;Q8CCX5	CON__P02533;Q61781	Keratin, type I cytoskeletal 14	Krt14	;
29.7242	29.1367	29.1515	28.8793	28.9766	28.9673	0.947058	-0.18426	10	10	10	59.3	59.3	59.3	15.524	0	198.44	5719900000	146	0.0163439	0.898161	0.469352	0.211698	P63276	P63276	40S ribosomal protein S17	Rps17
28.3032	26.3441	28.1967	27.9397	27.5635	26.3992	0.148487	-0.63324	5	5	5	16.8	16.8	16.8	32.931	0	10.19	2047800000	16	0.126184	0.882517	0.475416	0.178091	P51881;P48962;Q3V132	P51881;P48962	ADP/ATP translocase 2;ADP/ATP translocase 2, N-terminally processed;ADP/ATP translocase 1	Slc25a5;Slc25a4	;
25.1929	25.4856	25.4087	25.2444	25.2278	24.8784	0.762957	-0.18086	13	13	11	32.4	32.4	27.2	37.572	0	50.395	357750000	64	0.0226109	0.899659	0.491165	0.217895	P13707	P13707	Glycerol-3-phosphate dehydrogenase [NAD(+)], cytoplasmic	Gpd1
32.0088	31.5748	31.7671	31.4814	31.7191	30.8249	0.679516	-0.28567	30	30	30	38.7	38.7	38.7	69.293	0	196.7	30695000000	403	0.0452067	0.899204	0.495538	0.211572	CON__P02769;CON__P02768-1	CON__P02769
24.699	24.188	24.7156	24.1743	24.0202	24.5483	0.541787	-0.52469	19	19	19	9.1	9.1	9.1	273.99	0	65.33	210420000	45	0.0407948	0.898168	0.498784	0.214241	F6ZDS4	F6ZDS4	Nucleoprotein TPR	Tpr
21.8403	20.4761	20.6023	21.2579	21.61	19.0827	0.131548	0.65556	1	1	1	5.8	5.8	5.8	26.372	0.0024272	1.8872	28782000	2	0.163184	0.884525	0.499766	0.168008	O09061	O09061	Proteasome subunit beta type-1	Psmb1
20.0366	19.7667	20.2565	18.3407	19.0073	20.4501	0.518433	-1.02929	1	1	1	3.6	3.6	3.6	49.911	0	2.1924	8178300	1	0.111344	0.889061	0.500146	0.190719	Q62203	Q62203	Splicing factor 3A subunit 2	Sf3a2
29.5622	27.7214	29.3851	28.8566	28.5928	27.6931	0.302481	-0.79235	13	1	1	13.5	1.5	1.5	62.844	0	4.911	4345700000	13	0.100297	0.891286	0.501249	0.195097	Q3UV17	Q3UV17	Keratin, type II cytoskeletal 2 oral	Krt76
23.583	23.0907	22.9733	23.0499	23.1617	22.3802	0.500047	-0.04081	1	1	1	5.6	5.6	5.6	20.03	0	2.7039	84055000	8	0.0488887	0.899332	0.503514	0.213231	P09535	P09535	Insulin-like growth factor II;Insulin-like growth factor II;Preptin	Igf2
27.4549	27.1893	27.2411	27.1595	27.2159	26.2166	0.57428	-0.08157	27	27	27	39.3	39.3	39.3	76.722	0	181.37	1574800000	111	0.0838863	0.890265	0.5047	0.201921	P09405	P09405	Nucleolin	Ncl
20.799	20.1019	20.2918	20.0461	19.5897	20.291	0.652637	-0.2457	4	1	1	11.9	5.3	5.3	38.813	0.0023585	1.6453	11778000	1	0.0488086	0.897099	0.507393	0.214648	Q9JKB3	Q9JKB3	Y-box-binding protein 3	Ybx3
22.5812	22.6164	22.6493	19.3694	23.076	23.0304	0.255764	0.414	2	2	2	20.6	20.6	20.6	18.37	0	10.969	64983000	9	0.167907	0.885731	0.510457	0.167858	Q9QUR7	Q9QUR7	Peptidyl-prolyl cis-trans isomerase NIMA-interacting 1	Pin1
21.1924	21.1227	21.6104	21.8327	21.2976	19.7098	0.21444	0.10522	2	2	2	26.3	26.3	26.3	8.496	0	3.0408	30278000	7	0.13499	0.889122	0.511117	0.184152	P62309	P62309	Small nuclear ribonucleoprotein G	Snrpg
20.1452	19.2411	18.7739	17.6174	20.2295	20.9467	0.0676906	0.98847	1	1	1	4.8	4.8	4.8	24.774	0.0034642	1.4894	9402700	4	0.165344	0.883619	0.513021	0.169815	Q80WR5	Q80WR5	UPF0688 protein C1orf174 homolog
24.9686	23.224	24.3169	23.4528	23.6627	23.9366	0.38774	-0.65411	12	9	9	20	17.1	17.1	56.964	0	36.51	147280000	28	0.0569105	0.899338	0.513865	0.214165	CON__Q8N1N4-2;CON__Q7RTT2	CON__Q8N1N4-2;CON__Q7RTT2			;
27.2247	27.0596	27.9781	27.2865	27.3556	26.0615	0.440161	0.06176	11	11	11	26	26	26	25.604	0	81.861	1684300000	63	0.0961673	0.891429	0.514956	0.200757	O08585	O08585	Clathrin light chain A	Clta
23.0634	21.8879	23.513	22.5904	23.0213	22.3203	0.123385	-0.47302	5	3	3	19.1	19.1	19.1	28.211	0	20.597	92980000	11	0.124473	0.890713	0.51687	0.1902	P68510	P68510	14-3-3 protein eta	Ywhah
22.185	21.634	21.8737	20.5942	21.7782	21.8775	0.471474	-0.09553	2	2	2	8.9	8.9	8.9	32.296	0	14.475	38710000	3	0.107102	0.892017	0.517418	0.197361	Q8CCS6;D3Z5F7	Q8CCS6;D3Z5F7	Polyadenylate-binding protein 2	Pabpn1;Gm20521	;
20.7293	21.2739	21.7732	20.9104	21.4047	21.2642	0.0684261	-0.00976	3	3	3	4.7	4.7	4.7	101.52	0	5.8171	27649000	5	0.0917497	0.891361	0.518739	0.203539	A2AAY5	A2AAY5	SH3 and PX domain-containing protein 2B	Sh3pxd2b
26.4978	25.9068	26.3488	25.5979	25.8447	25.8406	1.17967	-0.50821	6	6	6	48.5	48.5	48.5	15.147	0	62.578	613760000	30	0.0151896	0.911501	0.519871	0.232627	Q9DB42	Q9DB42	Zinc finger protein 593	Znf593
23.2794	22.8575	23.2849	22.9336	22.4899	22.5785	1.13551	-0.70087	2	2	2	9.2	9.2	9.2	24.348	0	2.1949	69305000	7	0.00865024	0.915233	0.521372	0.237118	CON__P02663	CON__P02663
21.2346	21.0967	21.9379	22.0197	18.996	22.223	0.116115	0.78509	1	1	1	2.2	2.2	2.2	61.152	0.0024361	1.9224	41042000	5	0.167571	0.881267	0.528555	0.171918	Q9D3R6;Q3UMC0	Q9D3R6;Q3UMC0	Katanin p60 ATPase-containing subunit A-like 2;Spermatogenesis-associated protein 5	Katnal2;Spata5	;
20.3156	19.7755	21.7236	19.5787	21.1765	20.6487	0.0637503	0.33307	1	1	1	5.6	5.6	5.6	27.855	0	3.1003	24750000	2	0.150672	0.88809	0.54217	0.184212	Q9Z2U0;Q9CWH6	Q9Z2U0;Q9CWH6	Proteasome subunit alpha type-7;Proteasome subunit alpha type-7-like	Psma7;Psma8	;
22.0105	20.9069	20.4877	21.0412	21.1458	20.6093	0.157454	0.13429	4	4	4	5.7	5.7	5.7	104.98	0	17.531	30873000	8	0.12351	0.891247	0.55126	0.199797	P57780;Q7TPR4	P57780;Q7TPR4	Alpha-actinin-4;Alpha-actinin-1	Actn4;Actn1	;
28.2021	28.0802	29.3846	28.273	28.3048	28.2422	0.271702	0.07088	25	25	25	43.2	43.2	43.2	53.246	0	160.37	3694000000	281	0.0588139	0.91003	0.560881	0.229499	P53395	P53395	Lipoamide acyltransferase component of branched-chain alpha-keto acid dehydrogenase complex, mitochondrial	Dbt
32.7918	31.9337	31.7331	31.9287	31.9443	30.7692	0.525473	-0.00497	14	14	14	35.5	35.5	35.5	36.389	0	280.19	35184000000	234	0.0392877	0.917324	0.573356	0.241842	P01863;P01865;F6TQW2;P01864;P84751	P01863;P01865	Ig gamma-2A chain C region, A allele;Ig gamma-2A chain C region, membrane-bound form	Ighg;Igh-1a	;
34.8801	34.7632	35.1463	34.6537	34.6796	34.1197	0.971624	-0.22639	37	37	37	89.5	89.5	89.5	17.718	0	323.31	251880000000	782	0.00937138	0.924032	0.574619	0.258356	P62270;F6YVP7	P62270;F6YVP7	40S ribosomal protein S18	Rps18;Gm10260	;
23.2557	22.5098	23.0712	22.6035	22.4784	22.7775	0.607265	-0.46769	8	8	8	13.2	13.2	13.2	73.697	0	19.875	90090000	26	0.0879721	0.902803	0.577003	0.222682	E9Q5C9	E9Q5C9		Nolc1
22.0991	21.7101	21.7205	19.617	21.9866	22.9894	0.112277	0.26609	1	1	1	0.8	0.8	0.8	129.15	0.0034364	1.466	23861000	7	0.134028	0.891244	0.5792	0.201697	Q9QXH4	Q9QXH4	Integrin alpha-X	Itgax
21.372	20.3564	21.0861	21.6276	21.2782	18.5743	0.165754	0.19207	2	2	2	5.8	5.8	5.8	53.247	0	5.1742	25110000	4	0.146426	0.892521	0.579586	0.195079	Q9DCD0	Q9DCD0	6-phosphogluconate dehydrogenase, decarboxylating	Pgd
19.9801	19.6548	20.2894	19.563	19.2609	19.2331	1.37396	-0.71918	1	1	1	17.4	17.4	17.4	10.119	0.0098039	1.2723	8191300	1	0.0680478	0.911876	0.579958	0.231993	Q923D4	Q923D4	Splicing factor 3B subunit 5	Sf3b5
33.0364	31.1518	32.7716	32.2168	32.0144	31.9474	0.164895	-0.75718	38	37	22	48.9	48.9	36.3	59.51	0	323.31	47167000000	415	0.0657934	0.914292	0.59381	0.237382	CON__P13645;CON__Q7Z3Y7;CON__Q7Z3Y8;CON__Q148H6;CON__Q7Z3Z0	CON__P13645
25.2113	24.9317	25.0082	24.3859	24.4815	24.6076	2.21781	-0.52669	5	5	5	27.2	27.2	27.2	10.531	0	14.911	249090000	25	0.00101826	0.930248	0.602685	0.281932	Q99N91	Q99N91	39S ribosomal protein L34, mitochondrial	Mrpl34
21.8676	22.0177	21.944	22.0303	21.4971	21.4772	0.669571	-0.44687	2	2	2	13	13	13	27.815	0	11.36	38097000	7	0.0439873	0.922222	0.611784	0.253125	Q9D883	Q9D883	Splicing factor U2AF 35 kDa subunit	U2af1
18.2907	19.7862	19.8993	18.9523	19.0977	19.4812	0.0980684	-0.68848	1	1	1	1.1	1.1	1.1	122.61	0	2.6461	5517500	0	0.0704083	0.916459	0.615291	0.242081	Q80U87	Q80U87	Ubiquitin carboxyl-terminal hydrolase 8	Usp8
21.5801	20.477	21.699	20.8687	21.563	20.8285	0.133449	-0.71139	4	4	4	11.4	11.4	11.4	44.76	0	11.218	38274000	3	0.121646	0.898613	0.619029	0.218027	P61161	P61161	Actin-related protein 2	Actr2
21.0662	20.9159	21.57	21.6164	19.0682	20.6779	0.401409	-0.3883	3	1	1	6	2.7	2.7	33.558	0.0034522	1.4833	33173000	7	0.143671	0.89672	0.634936	0.208972	Q9Z130	Q9Z130	Heterogeneous nuclear ribonucleoprotein D-like	Hnrnpdl
25.2103	24.8363	24.7576	24.237	24.2758	24.4176	1.85034	-0.56058	5	5	5	18.9	18.9	18.9	12.441	0	13.835	259600000	33	0.0247456	0.928193	0.635961	0.271755	P83882;A0A0A6YW33	P83882	60S ribosomal protein L36a	Rpl36a
27.3608	26.9945	27.0193	26.6623	26.8032	25.8106	0.988416	-0.35701	14	14	14	44.9	44.9	44.9	32.56	0	146.29	1228300000	70	0.0497499	0.923321	0.637068	0.258838	Q61937	Q61937	Nucleophosmin	Npm1
21.1552	21.2572	20.3291	20.8355	20.4685	19.8668	0.571508	-0.68666	11	4	4	14.9	7.7	7.7	67.317	0	8.169	21138000	5	0.0865922	0.917096	0.637392	0.240938	P21619	P21619	Lamin-B2	Lmnb2
21.5414	22.2203	22.8545	21.2248	21.615	21.6474	0.815791	-0.60531	1	1	1	1.8	1.8	1.8	80.027	0	10.146	30987000	5	0.0167461	0.930326	0.643464	0.279765	O88967	O88967	ATP-dependent zinc metalloprotease YME1L1	Yme1l1
20.4377	19.8733	20.5774	19.9783	19.4185	20.3943	0.441904	-0.45939	1	1	1	31.8	31.8	31.8	5.0256	0	11.787	13096000	1	0.0733218	0.920344	0.648199	0.2507	Q6ZWY8	Q6ZWY8	Thymosin beta-10	Tmsb10
24.3778	24.2558	24.9066	24.0314	24.0402	23.4828	1.14523	-0.34631	3	3	3	26.8	26.8	26.8	16.837	0	13.927	240510000	20	0.0768783	0.921538	0.653797	0.250569	P0DP28;P0DP27;P0DP26;P20801	P0DP28;P0DP27;P0DP26			;;
22.8716	22.2665	21.8864	22.3186	21.9692	21.2534	0.509629	-0.29728	7	7	7	6.7	6.7	6.7	152.04	0	10.426	46232000	11	0.0440732	0.927163	0.656243	0.268112	Q7TPV4	Q7TPV4	Myb-binding protein 1A	Mybbp1a
27.5991	27.4641	27.9903	27.3196	27.3116	26.9802	1.16887	-0.28756	34	34	34	23.2	23.2	23.2	207.12	0	323.31	1793700000	160	0.0202113	0.929187	0.656588	0.282235	Q6P5H2	Q6P5H2	Nestin	Nes
27.4545	28.0295	27.0298	27.3002	26.5958	26.9049	0.739235	-0.54955	2	2	2	6.2	6.2	6.2	61.976	0	145.54	3464500000	453	0.00961291	0.933028	0.660175	0.292191	Q8R317;Q99NB8;Q9QZM0	Q8R317;Q99NB8;Q9QZM0	Ubiquilin-1;Ubiquilin-4;Ubiquilin-2	Ubqln1;Ubqln4;Ubqln2	;;
22.5588	21.7437	22.6622	22.0945	21.9188	21.0068	0.659687	-0.64007	3	3	3	3.9	3.9	3.9	96.02	0	5.3131	49567000	6	0.0706688	0.924618	0.663154	0.256523	Q9Z1X4	Q9Z1X4	Interleukin enhancer-binding factor 3	Ilf3
22.6603	22.0112	22.6061	20.8745	22.5153	21.1262	0.769392	-1.4799	4	4	4	5.2	5.2	5.2	91.006	0	5.6114	43684000	3	0.0634274	0.924667	0.668487	0.2619	O35286;G3X8X0;A2A4P0	O35286	Pre-mRNA-splicing factor ATP-dependent RNA helicase DHX15	Dhx15
24.0864	22.7316	23.0399	22.9436	22.5077	23.1678	0.383003	-0.09632	5	5	5	15.9	15.9	15.9	38.676	0	15.65	87008000	7	0.0375359	0.929294	0.669138	0.276048	P07356	P07356	Annexin A2	Anxa2
19.3696	19.3846	20.2164	19.7591	19.0883	19.7598	0.123656	0.37454	1	1	1	3.4	3.4	3.4	33.189	0.0023557	1.6448	6767800	1	0.0649829	0.925582	0.67057	0.261722	Q9DB05	Q9DB05	Alpha-soluble NSF attachment protein	Napa
28.2994	28.2483	28.9983	27.6693	28.224	27.5113	1.03333	-0.63012	6	4	4	53.9	46.9	46.9	13.509	0	39.03	3194400000	41	0.037973	0.931079	0.686245	0.281586	Q3THW5;P0C0S6	Q3THW5;P0C0S6	Histone H2A.V;Histone H2A.Z	H2afv;H2afz	;
21.7355	21.534	20.6859	21.3352	21.778	18.8083	0.278322	-0.19876	12	1	1	39.8	4.2	4.2	39.652	0	3.9445	26256000	7	0.110067	0.917771	0.701797	0.245027	Q8BG05	Q8BG05	Heterogeneous nuclear ribonucleoprotein A3	Hnrnpa3
29.0983	29.0419	29.6507	28.7104	28.7049	28.1946	1.31569	-0.39346	28	28	28	37.7	37.7	37.7	68.512	0	243.54	5082800000	220	0.0218079	0.938513	0.720349	0.304217	Q99KN9	Q99KN9	Clathrin interactor 1	Clint1
22.2331	22.3113	23.1987	22.3293	22.199	22.0497	0.53504	-0.11226	7	7	7	36.2	36.2	36.2	22.395	0	13.113	70317000	7	0.067083	0.93125	0.720929	0.275583	Q9WVA4;Q9R1Q8	Q9WVA4	Transgelin-2	Tagln2
24.9394	24.1817	24.703	24.3385	24.237	23.2102	0.734111	-0.46607	3	3	3	22.1	22.1	22.1	12.259	0	38.391	212970000	16	0.0380667	0.93373	0.7241	0.294148	P84089	P84089	Enhancer of rudimentary homolog	Erh
19.5672	19.6839	20.6364	18.4514	17.8926	21.1326	0.310726	-1.23247	2	2	2	4.7	4.7	4.7	57.229	0	4.5988	10449000	2	0.117178	0.917498	0.72544	0.246115	Q5XJY5	Q5XJY5	Coatomer subunit delta	Arcn1
25.7464	25.0474	25.2862	24.9948	24.384	25.2401	0.676716	-0.29139	1	1	1	4.9	4.9	4.9	26.422	0	6.2934	352060000	13	0.0198259	0.941219	0.726052	0.307845	Q9CPN9	Q9CPN9		2210010C04Rik
23.7268	23.0334	22.7856	22.7162	22.871	22.165	0.778888	-0.31729	2	1	1	31	15.5	15.5	9.461	0	3.9065	97387000	11	0.0645001	0.930698	0.726748	0.278816	Q6ZWU9	Q6ZWU9	40S ribosomal protein S27	Rps27
22.3612	22.0051	21.6029	22.0492	21.7065	21.6615	0.297502	-0.29851	2	2	2	4.6	4.6	4.6	59.065	0	7.3465	39064000	10	0.0370019	0.937442	0.745418	0.301868	Q9DBA6	Q9DBA6	Peroxisomal leader peptide-processing protease;Peroxisomal leader peptide-processing protease, 10 kDa form;Peroxisomal leader peptide-processing protease, 49 kDa form	Tysnd1
20.3168	19.5435	20.8656	18.8333	18.6939	21.0056	0.36277	-1.4835	2	2	2	8.6	8.6	8.6	28.357	0	18.408	14640000	4	0.115049	0.923583	0.765526	0.256682	P57784;A0A0U1RNZ6	P57784;A0A0U1RNZ6	U2 small nuclear ribonucleoprotein A	Snrpa1	;
24.1079	24.4132	24.4135	24.108	23.6575	22.9032	0.9667	-0.75566	4	4	4	13.9	13.9	13.9	43.02	0	18.759	162430000	19	0.0226246	0.944506	0.77134	0.321501	Q9Z1A1	Q9Z1A1		Tfg
21.5871	21.3528	21.0334	21.3557	21.2548	18.4753	0.429951	-0.09801	1	1	1	7.2	7.2	7.2	35.827	0	4.3865	18956000	1	0.0777059	0.928933	0.77159	0.283236	P58137	P58137	Acyl-coenzyme A thioesterase 8	Acot8
22.3985	22.9068	23.2017	22.7198	22.7318	21.1621	0.479516	-0.18705	1	1	1	4.9	4.9	4.9	18.281	0	2.6664	56484000	8	0.0275875	0.944232	0.790592	0.323898	CON__P02754	CON__P02754
19.3918	20.3699	20.7425	19.7142	18.9753	20.3839	0.345186	-0.65567	2	1	1	2.6	1.6	1.6	96.406	0	4.2032	14547000	1	0.0963445	0.930414	0.792149	0.275961	Q61699	Q61699	Heat shock protein 105 kDa	Hsph1
20.5281	17.9566	19.5018	18.9897	18.9306	18.241	0.317309	-0.57118	1	1	1	1.8	1.8	1.8	50.421	0.0096463	1.2037	4803200	1	0.0611899	0.937711	0.795032	0.300748	Q8BVY0	Q8BVY0	Ribosomal L1 domain-containing protein 1	Rsl1d1
25.564	25.335	25.7865	24.9524	24.8343	24.5892	1.98743	-0.72977	17	17	17	12	12	12	185.21	0	60.526	358160000	63	0.00349521	0.960698	0.800868	0.357319	Q6PB44;REV__Q8CJ40	Q6PB44	Tyrosine-protein phosphatase non-receptor type 23	Ptpn23
32.7725	30.9648	32.2529	31.856	31.8179	30.9622	0.299813	-0.43493	62	62	38	88.4	88.4	70.5	65.865	0	323.31	36863000000	511	0.0401101	0.943336	0.805528	0.318914	CON__P35908;CON__Q6NXH9;Q6NXH9;Q6IFZ9	CON__P35908
19.4336	20.0534	19.9278	19.5903	18.6045	19.0326	0.998908	-0.89525	1	1	1	11.4	11.4	11.4	14.098	0	4.0509	5335800	2	0.0472294	0.942721	0.813576	0.316085	Q9D937	Q9D937	Uncharacterized protein C11orf98 homolog
21.0387	18.9544	22.0675	20.7643	20.7357	19.0127	0.181252	-0.30295	2	2	2	8.8	8.8	8.8	29.47	0	5.6344	24598000	2	0.118956	0.926034	0.815196	0.264616	Q9R1P0	Q9R1P0	Proteasome subunit alpha type-4	Psma4
21.391	20.8621	21.4264	21.4042	20.8384	18.5883	0.467418	-0.55257	2	2	2	8.8	8.8	8.8	26.24	0	4.0217	23341000	5	0.0907487	0.929792	0.818132	0.28626	Q9CQF3	Q9CQF3	Cleavage and polyadenylation specificity factor subunit 5	Nudt21
20.483	19.3935	21.2166	19.5286	20.44	18.8334	0.469052	-0.95437	1	1	1	4	4	4	40.57	0.0088009	1.3112	13071000	1	0.0785579	0.934179	0.822279	0.296052	P05132	P05132	cAMP-dependent protein kinase catalytic subunit alpha	Prkaca
22.8669	22.9453	22.6737	22.4168	22.3502	20.9642	0.891147	-0.51672	3	3	3	12.8	12.8	12.8	33.377	0	7.1612	67786000	9	0.057901	0.942402	0.826824	0.312154	Q9EQU5	Q9EQU5	Protein SET	Set
24.9692	24.856	24.4373	24.534	24.3677	22.6099	0.651565	-0.48834	7	7	7	22.8	22.8	22.8	43.846	0	37.039	184630000	20	0.0255574	0.955204	0.841712	0.342748	Q9D826	Q9D826	Peroxisomal sarcosine oxidase	Pipox
21.2807	21.9914	21.682	20.9832	21.0574	21.2673	1.15901	-0.62454	1	1	1	3	3	3	59.71	0	4.9263	26787000	5	0.0106385	0.961278	0.843225	0.360159	Q8C5L3	Q8C5L3	CCR4-NOT transcription complex subunit 2	Cnot2
21.4935	21.5145	22.3335	17.7142	22.8549	21.85	0.240437	0.33548	3	3	3	16.7	16.7	16.7	19.667	0	6.1908	54270000	7	0.149696	0.918738	0.84659	0.244678	P59999	P59999	Actin-related protein 2/3 complex subunit 4	Arpc4
33.7854	31.817	33.26	32.4705	32.4393	31.3703	0.551735	-0.82062	57	52	38	62.9	62.9	52.6	66.017	0	323.31	65068000000	775	0.0371753	0.953992	0.864409	0.339597	CON__P04264	CON__P04264
33.4506	31.7632	32.7543	32.0276	32.1862	30.8521	0.681199	-0.72667	44	44	43	66.6	66.6	66.6	62.129	0	323.31	50074000000	531	0.0279764	0.960623	0.88746	0.355325	CON__P35527	CON__P35527
24.93	25.1837	24.1219	23.7515	23.987	23.7995	1.28514	-1.13056	6	6	5	23.9	23.9	21.5	39.735	0	26.038	226270000	25	0.020039	0.964045	0.90973	0.371186	Q9QZQ8	Q9QZQ8	Core histone macro-H2A.1	H2afy
21.7412	17.83	21.4921	17.3496	20.1536	18.6412	0.47335	-2.85089	3	1	1	22.8	5.6	5.6	20.396	0.0024661	2.0638	13911000	2	0.136397	0.926653	0.914979	0.268707	P61750	P61750	ADP-ribosylation factor 4	Arf4
23.6216	19.4477	24.2367	20.1668	23.4144	23.8647	0.0080545	-0.20723	33	1	1	49.8	1.8	1.8	60.044	0	8.9725	88219000	6	0.142894	0.926209	0.935291	0.265765	CON__P02538;CON__O95678;CON__Q8VED5;Q8VED5;E9Q1Z0;D3Z6R0	CON__P02538
23.8671	22.6602	23.4882	22.7982	22.5051	22.2874	0.981808	-0.9831	2	2	2	1	1	1	248.07	0	16.271	81302000	9	0.0111874	0.972692	0.935409	0.392327	CON__Q5D862	CON__Q5D862
20.4892	20.904	21.0875	20.6974	20.8919	18.7145	0.432696	-0.20661	2	2	2	9.8	9.8	9.8	28.832	0	3.5184	26542000	4	0.0909005	0.943405	0.942857	0.31533	Q9DBJ1;O70250	Q9DBJ1;O70250	Phosphoglycerate mutase 1;Phosphoglycerate mutase 2	Pgam1;Pgam2	;
22.1118	20.9868	22.1663	21.7485	18.89	22.3201	0.27317	-0.3633	6	2	2	22	9.4	9.4	27.778	0	56.76	44551000	8	0.0996427	0.940948	0.948644	0.308856	P68254	P68254	14-3-3 protein theta	Ywhaq
29.0585	28.9125	29.1751	28.238	28.2995	27.6997	2.04016	-0.8205	33	33	33	30.3	30.3	30.3	86.014	0	149.6	3822000000	211	0.00208545	0.980415	0.966018	0.427813	Q99LI8;REV__F6XLV1	Q99LI8	Hepatocyte growth factor-regulated tyrosine kinase substrate	Hgs
27.8294	27.583	28.0309	27.0948	26.8958	26.1556	1.60516	-0.9335	16	16	14	26.5	26.5	24.5	59.771	0	208.08	1625600000	87	0.00845484	0.979379	0.970775	0.409996	P70297	P70297	Signal transducing adapter molecule 1	Stam
21.9887	21.1681	21.7737	21.2379	20.6851	19.8027	1.03487	-1.08861	1	1	1	9.4	9.4	9.4	14.173	0	5.9095	28227000	4	0.0374064	0.966953	0.991717	0.377447	Q9D0T1	Q9D0T1	NHP2-like protein 1;NHP2-like protein 1, N-terminally processed	Nhp2l1
21.0399	20.3625	20.9884	20.805	21.5523	19.3667	0.119592	-0.18337	2	2	2	2.8	2.8	2.8	88.544	0	3.8229	18386000	3	0.0538476	0.962298	1.00301	0.363848	Q8K4Z5	Q8K4Z5	Splicing factor 3A subunit 1	Sf3a1
23.5504	21.1293	23.0454	21.3882	20.9826	21.8936	0.668157	-1.65723	1	1	1	1.5	1.5	1.5	114.6	0	5.7495	45959000	2	0.0260576	0.980282	1.10438	0.424363	Q61495;Q7TSF1	Q61495;Q7TSF1	Desmoglein-1-alpha;Desmoglein-1-beta	Dsg1a;Dsg1b	;
23.3619	23.3246	23.9167	24.0103	18.5047	23.6752	0.33925	0.31334	1	1	1	12.6	12.6	12.6	10.871	0	8.3527	119560000	7	0.116805	0.943944	1.11097	0.322333	P61957;Q9Z172	P61957;Q9Z172	Small ubiquitin-related modifier 2;Small ubiquitin-related modifier 3	Sumo2;Sumo3	;
24.6934	24.2452	24.2803	23.5979	23.4492	23.0626	2.07059	-0.83108	9	9	9	33.5	33.5	33.5	38.734	0	70.857	181690000	33	0.00838122	0.988044	1.12132	0.462637	P10107;A2BH40	P10107	Annexin A1	Anxa1
21.1226	21.6926	20.8645	21.4254	21.2082	18.0025	0.375429	0.08568	2	2	2	3.9	3.9	3.9	63.299	0.0066815	1.3814	29150000	7	0.080146	0.96283	1.13257	0.367048	Q8CI51	Q8CI51	PDZ and LIM domain protein 5	Pdlim5
22.8769	22.624	23.5983	18.6401	23.1213	22.6304	0.468938	-0.24647	1	1	1	1.6	1.6	1.6	51.864	0.0087816	1.303	76402000	9	0.0940212	0.961238	1.14694	0.354407	Q32MG2	Q32MG2	Spermatid-associated protein	Spert
27.3371	27.2469	27.1263	26.1895	26.2338	25.7444	2.66809	-1.0574	13	11	11	27.2	25	25	57.454	0	91.35	954590000	67	5.68502e-05	0.999941	1.14816	0.533975	O88811	O88811	Signal transducing adapter molecule 2	Stam2
22.8515	21.9453	23.331	22.8826	21.1824	20.4919	0.658597	-1.66913	6	6	6	29.4	29.4	29.4	28.467	0	59.835	85915000	9	0.070543	0.97076	1.17119	0.386237	Q6IRU2	Q6IRU2	Tropomyosin alpha-4 chain	Tpm4
21.007	21.0493	21.2148	20.6932	19.5846	20.6573	0.988937	-0.39206	2	1	1	8.6	5.2	5.2	30.891	0	2.5891	15121000	2	0.00597185	0.994203	1.20067	0.497391	O35326	O35326	Serine/arginine-rich splicing factor 5	Srsf5
22.6521	22.7293	22.7658	21.271	22.13	20.9467	1.63181	-1.45828	2	2	2	2.9	2.9	2.9	86.751	0	3.3882	37487000	4	0.000980435	0.998722	1.21615	0.534418	Q922K7	Q922K7	Probable 28S rRNA (cytosine-C(5))-methyltransferase	Nop2
21.8374	22.7663	24.5208	22.4376	22.1445	20.0899	0.617928	-0.62178	2	2	2	29.3	29.3	29.3	10.803	0	8.1748	74329000	10	0.0560039	0.980258	1.22353	0.415787	P62305	P62305	Small nuclear ribonucleoprotein E	Snrpe
20.3367	20.3679	19.6968	18.4734	21.5401	18.9205	0.190948	-1.41621	3	3	3	3.3	3.3	3.3	117.81	0	10.242	12147000	3	0.0542901	0.980678	1.24018	0.421877	Q02053	Q02053	Ubiquitin-like modifier-activating enzyme 1	Uba1
24.2426	23.8847	23.3869	23.3387	23.21	20.9859	0.759744	-0.67468	7	6	6	24.5	22	22	34.306	0	21.636	125640000	22	0.035014	0.986844	1.26263	0.454809	P35550;Q80WS3	P35550	rRNA 2-O-methyltransferase fibrillarin	Fbl
26.2903	24.7882	25.5885	25.6156	25.1447	24.8883	0.282964	-0.44377	2	2	2	1	1	1	341.12	0.0088106	1.3164	319380000	2	0.0668545	0.979128	1.29076	0.416288	Q9ERU9	Q9ERU9	E3 SUMO-protein ligase RanBP2	Ranbp2
25.2893	25.6284	24.1554	23.171	23.5776	23.6299	1.5404	-1.71168	16	15	15	27.7	26.5	26.5	74.237	0	63.814	214350000	26	0.00537722	0.999352	1.34094	0.547354	P48678	P48678	Prelamin-A/C;Lamin-A/C	Lmna
22.2682	21.7392	22.6257	21.5373	22.0383	18.4534	0.596967	-0.73087	2	2	2	39.5	39.5	39.5	9.7251	0	26.606	41522000	7	0.0537399	0.986476	1.35078	0.447583	P62307	P62307	Small nuclear ribonucleoprotein F	Snrpf
21.7878	21.4089	19.2165	19.2395	20.2244	20.1601	0.466458	-1.24876	1	1	1	2	2	2	49.374	0.006689	1.3816	13013000	2	0.0277534	0.994877	1.37009	0.495368	A2BDX3	A2BDX3	Adenylyltransferase and sulfurtransferase MOCS3;Molybdopterin-synthase adenylyltransferase;Molybdopterin-synthase sulfurtransferase	Mocs3
19.9316	18.5011	21.5352	18.6264	19.2948	19.2376	0.446253	-0.69401	1	1	1	5.2	5.2	5.2	19.889	0.006772	1.4151	14912000	2	0.0542449	0.987808	1.38524	0.454309	A0A0N4SUH6;Q9CWZ3	A0A0N4SUH6;Q9CWZ3	RNA-binding protein 8A	Rbm8a	;
21.6183	21.4797	23.013	21.7198	18.7117	21.3584	0.604802	-0.25994	3	3	3	13.1	13.1	13.1	32.25	0	4.4547	34503000	2	0.0359108	0.994567	1.40824	0.489792	P42125	P42125	Enoyl-CoA delta isomerase 1, mitochondrial	Eci1
20.2653	19.7017	20.0647	18.6579	19.7706	18.8358	1.13421	-1.22891	1	1	1	7.6	7.6	7.6	19.462	0.0023923	1.7752	6694400	1	0.00722469	0.998717	1.41048	0.561574	P63028	P63028	Translationally-controlled tumor protein	Tpt1
21.9681	21.4415	20.3297	18.6003	19.6732	19.7757	1.44079	-1.7683	6	1	1	12.9	4.4	4.4	49.067	0	6.3789	19735000	2	0.037627	0.996161	1.5131	0.511219	Q8VDW0	Q8VDW0	ATP-dependent RNA helicase DDX39A	Ddx39a
22.383	21.0414	18.2967	19.3629	19.8464	19.785	0.305381	-1.25644	2	2	2	17.7	17.7	17.7	19.023	0	6.9935	14121000	2	0.0346063	0.999363	1.69233	0.557582	Q9CPP0	Q9CPP0	Nucleoplasmin-3	Npm3
33.1507	32.7956	32.9899	31.5946	31.6442	30.716	2.19019	-1.39536	70	70	66	92.5	92.5	89.3	53.687	0	323.31	53836000000	797	0.000436833	1	1.70225	0.731453	P20152;P31001;P15331;P03995;P46660;P08553;E9Q1Y9;CON__Q61726;CON__O43790;CON__Q6NT21;CON__P78385;CON__Q14533;CON__P78386;Q9ERE2;P97861;Q6IMF0;Q9Z2T6;P08551	P20152	Vimentin	Vim
21.476	20.984	21.459	17.9982	18.7678	20.2518	1.55593	-2.69122	4	4	4	2.2	2.2	2.2	188.74	0	8.3241	27256000	5	0.0309624	1	1.96814	0.624963	Q9JKF1	Q9JKF1	Ras GTPase-activating-like protein IQGAP1	Iqgap1
21.0455	20.5356	21.3288	18.8358	20.3977	20.3321	0.929789	-0.71334	4	2	2	10.2	6	6	61.936	0	11.91	14851000	2	0.00795639	1	1.97636	0.722313	Q62188	Q62188	Dihydropyrimidinase-related protein 3	Dpysl3
21.4621	21.8088	19.0349	18.8021	19.6349	18.3332	0.904366	-2.66004	1	1	1	5.3	5.3	5.3	20.151	0.0066519	1.3598	17700000	1	0.0226925	1	2.03423	0.666108	Q80ZM5	Q80ZM5		H1fx
21.6821	22.6068	18.0789	18.3361	18.8876	17.72	0.804835	-3.34594	1	1	1	23.4	23.4	23.4	11.614	0	13.473	11978000	1	0.0255405	1	2.06536	0.662382	P17095	P17095	High mobility group protein HMG-I/HMG-Y	Hmga1
20.5897	20.2915	21.5697	17.8409	21.1945	17.9244	0.715114	-2.66523	2	2	2	2.7	2.7	2.7	72.602	0.0023753	1.677	13374000	2	0.0134536	1	2.08815	0.718208	Q7TQK5	Q7TQK5	Coiled-coil domain-containing protein 93	Ccdc93
24.6022	23.2246	23.7432	23.7382	23.8231	20.5853	0.428363	-0.00504	1	1	1	2.7	2.7	2.7	31.732	0.009636	1.1956	104850000	1	0.0249728	1	2.13238	0.678108	Q60930	Q60930	Voltage-dependent anion-selective channel protein 2	Vdac2
22.531	22.8436	22.0978	22.7273	19.1148	18.6015	0.824945	-3.41617	1	1	1	2.3	2.3	2.3	68.461	0	5.1072	54286000	3	0.0303007	1	2.14335	0.66141	Q61545	Q61545	RNA-binding protein EWS	Ewsr1
22.331	22.0084	22.3317	21.054	17.9717	21.7479	0.777455	-1.277	3	3	3	3.3	3.3	3.3	171.75	0	5.4719	28201000	3	0.00761209	1	2.3922	0.830558	Q80TZ9	Q80TZ9	Arginine-glutamic acid dipeptide repeats protein	Rere
24.3422	19.6479	21.8605	20.0467	19.5011	19.2039	0.792845	-2.35934	1	1	1	1.6	1.6	1.6	78.947	0.0097614	1.2515	33139000	1	0.0082396	1	2.64319	0.882784	Q922E6	Q922E6	FAST kinase domain-containing protein 2	Fastkd2
24.9568	18.9904	25.984	24.037	24.6901	18.582	0.108287	-0.91978	1	1	1	4.8	4.8	4.8	24.32	0.009667	1.2074	309520000	4	0.067437	1	2.95669	0.652041	Q7TN89	Q7TN89	GTPase ERas	Eras
28.6625	19.617	19.0519	18.8336	19.1317	20.9741	0.367182	-0.48527	25	19	3	47.4	38.2	6.6	49.586	0	84.391	578830000	33	0.0461636	1	3.66961	0.804779	CON__P13646-1	CON__P13646-1
22.6488	21.2699	20.4709	18.3305	17.3624	17.3198	2.21323	-3.90749	4	4	4	45.5	45.5	45.5	17.09	0	16.654	43851000	5	0.00714227	0.999866	3.76698	1.12039	Q9CYL5	Q9CYL5	Golgi-associated plant pathogenesis-related protein 1	Glipr2
27.003	20.171	20.3077	19.0769	19.1203	19.0644	0.687461	-1.2309	16	13	10	29.5	25.1	20.2	63.91	0	57.954	195470000	19	0.0161772	1	3.93853	1.03223	CON__P19013	CON__P19013

## Sheet: Figure 7B ChIP-SICAP
iBAQ 04. R2_Olig2	iBAQ 02. R2_CTR	iBAQ 01. R1_CTR	Only identified by site	Reverse	Potential contaminant	IP-MS Moen et al PMID 28375211	BHLH	matrix129	matrix128	Peptides	Razor + unique peptides	Unique peptides	Sequence coverage [%]	Unique + razor sequence coverage [%]	Unique sequence coverage [%]	Mol. weight [kDa]	Q-value	Intensity	MS/MS Count	Peptides 04. R2_Olig2	Unique peptides 04. R2_Olig2	Phospho (STY) site IDs	Phospho (STY) site positions	Intensity 04. R2_Olig2	Protein IDs	Majority protein IDs	Protein names	Gene names
#!{Description}	iBAQ 02. R2_CTR	iBAQ 01. R1_CTR
#!{Type}E	E	E	C	C	C	C	C	C	C	N	N	N	N	N	N	N	N	N	N	N	N	N	N	N	T	T	T	T
4.73178	n. def.	5.91024				OLIG2			+	1	1	1	1.8	1.8	1.8	87.752	0.0038911	2588400	1	1	1	n. def.	n. def.	2588400	Q3TCH7;A2A432	Q3TCH7;A2A432	Cullin-4A;Cullin-4B	Cul4a;Cul4b
4.97011	n. def.	n. def.				OLIG2				1	1	1	0.6	0.6	0.6	217.75	0	8214600	1	1	1	n. def.	n. def.	8214600	Q6PDQ2;A2A8L1	Q6PDQ2;A2A8L1	Chromodomain-helicase-DNA-binding protein 4	Chd4;Chd5
4.52836	n. def.	n. def.								1	1	1	0.7	0.7	0.7	211.49	0	3409500	0	1	1	n. def.	n. def.	3409500	A2A8L5	A2A8L5	Receptor-type tyrosine-protein phosphatase F	Ptprf
n. def.	n. def.	n. def.								1	1	1	0.6	0.6	0.6	144.98	0	0	1	1	1	n. def.	n. def.	0	A2AFR3	A2AFR3	FERM and PDZ domain-containing protein 4	Frmpd4
5.12074	n. def.	n. def.								1	1	1	1.5	1.5	1.5	244.56	0	13998000	1	1	1	n. def.	n. def.	13998000	A2AGH6	A2AGH6	Mediator of RNA polymerase II transcription subunit 12	Med12
n. def.	n. def.	n. def.								1	1	1	0.9	0.9	0.9	175.89	0.0033898	0	1	1	1	n. def.	n. def.	0	A2AHC3	A2AHC3	Calmodulin-regulated spectrin-associated protein 1	Camsap1
5.91642	4.57586	n. def.						+		1	1	1	3.5	3.5	3.5	80.796	0	29698000	1	1	1	n. def.	n. def.	29698000	A2AQ19	A2AQ19	RNA polymerase-associated protein RTF1 homolog	Rtf1
4.80373	n. def.	5.19262							+	1	1	1	0.4	0.4	0.4	221.49	0	6873100	1	1	1	n. def.	n. def.	6873100	A2AQP0	A2AQP0	Myosin-7B	Myh7b
n. def.	n. def.	n. def.								1	1	1	0.2	0.2	0.2	784.85	0.0041494	0	1	1	1	n. def.	n. def.	0	A2ARZ3	A2ARZ3	Fibrous sheath-interacting protein 2	Fsip2
4.08803	n. def.	n. def.								1	1	1	0	0	0	3906.4	0	23183000	1	1	1	208	33976	23183000	A2ASS6	A2ASS6	Titin	Ttn
4.89128	n. def.	n. def.								2	2	2	0.8	0.8	0.8	328.8	0	11522000	2	2	2	n. def.	n. def.	11522000	A2AWL7	A2AWL7	MAX gene-associated protein	Mga
8.05265	7.79416	n. def.						+		1	1	1	2.1	2.1	2.1	49.985	0	2370800000	2	1	1	n. def.	n. def.	2370800000	A6H684	A6H684	Alpha-1,3-mannosyl-glycoprotein 4-beta-N-acetylglucosaminyltransferase-like protein LOC641515 homolog
4.98623	n. def.	n. def.								1	1	1	1.7	1.7	1.7	104.05	0	4553300	1	1	1	10	396	4553300	B1AS29	B1AS29	Glutamate receptor ionotropic, kainate 3	Grik3
5.34437	n. def.	n. def.								1	1	1	2.2	2.2	2.2	35.884	0.0034483	3756900	1	1	1	n. def.	n. def.	3756900	B1AS42	B1AS42	NADH-cytochrome b5 reductase-like	Cyb5rl
6.61578	5.86486	n. def.						+		1	1	1	3.4	3.4	3.4	71.958	0	148620000	2	1	1	n. def.	n. def.	148620000	B7ZNG4	B7ZNG4	Tastin	Troap
8.49536	8.13944	7.2164						+	+	6	6	6	58.6	58.6	58.6	13.95	0	1564300000	12	6	6	n. def.	n. def.	1564300000	Q8CGP6;Q8R1M2;Q8CGP7;Q8CGP5;Q8BFU2;C0HKE9;C0HKE8;C0HKE7;C0HKE6;C0HKE5;C0HKE4;C0HKE3;C0HKE2;C0HKE1;Q64523;Q6GSS7;P27661;Q3THW5;P0C0S6;Q64522	Q8CGP6;Q8R1M2;Q8CGP7;Q8CGP5;Q8BFU2;C0HKE9;C0HKE8;C0HKE7;C0HKE6;C0HKE5;C0HKE4;C0HKE3;C0HKE2;C0HKE1;Q64523;Q6GSS7;P27661	Histone H2A type 1-H;Histone H2A.J;Histone H2A type 1-K;Histone H2A type 1-F;Histone H2A type 3;Histone H2A type 2-C;Histone H2A type 2-A;Histone H2A.x	Hist1h2ah;H2afj;Hist1h2ak;Hist1h2af;Hist3h2a;Hist2h2ac;Hist2h2aa1;H2afx
5.25484	n. def.	n. def.								1	1	1	1.7	1.7	1.7	79.396	0	6113700	1	1	1	n. def.	n. def.	6113700	D3YVF0	D3YVF0	A-kinase anchor protein 5	Akap5
4.82539	n. def.	n. def.								1	1	1	0.8	0.8	0.8	159.18	0	5418500	1	1	1	17	894	5418500	E1U8D0	E1U8D0	Protein SOGA1;N-terminal form;C-terminal 80 kDa form	Soga1
4.23497	4.03338	n. def.						+		2	2	2	1.2	1.2	1.2	350.86	0	2576700	2	2	2	n. def.	n. def.	2576700	E9PVX6	E9PVX6		Mki67
4.92055	n. def.	n. def.								1	1	1	0.6	0.6	0.6	196.02	0	5913000	1	1	1	n. def.	n. def.	5913000	E9PX95	E9PX95		Abca17
4.36433	n. def.	n. def.							+	1	1	1	0.8	0.8	0.8	265.25	0.0034014	2799700	0	1	1	n. def.	n. def.	2799700	Q5SWU9;E9Q4Z2	Q5SWU9;E9Q4Z2	Acetyl-CoA carboxylase 1;Biotin carboxylase	Acaca;Acacb
n. def.	n. def.	n. def.								1	1	1	0.2	0.2	0.2	584.78	0	0	1	1	1	n. def.	n. def.	0	E9Q555	E9Q555	E3 ubiquitin-protein ligase RNF213	Rnf213
n. def.	n. def.	n. def.								1	1	1	1	1	1	235.63	0.003861	0	1	1	1	19	238	0	E9Q7G0	E9Q7G0		Numa1
6.40946	n. def.	n. def.								1	1	1	4.5	4.5	4.5	81.36	0.0039062	100120000	1	1	1	n. def.	n. def.	100120000	E9Q7T7	E9Q7T7		Chadl
7.03655	n. def.	n. def.								1	1	1	1.3	1.3	1.3	141.9	0	543900000	1	1	1	n. def.	n. def.	543900000	E9Q7X6	E9Q7X6	Protein HEG homolog 1	Heg1
n. def.	n. def.	n. def.								1	1	1	0.7	0.7	0.7	132.59	0	0	1	1	1	n. def.	n. def.	0	Q9R0K7;Q6Q477;G5E829	Q9R0K7;Q6Q477;G5E829	Plasma membrane calcium-transporting ATPase 2	Atp2b2;Atp2b4;Atp2b1
4.13082	n. def.	n. def.								1	1	1	0.7	0.7	0.7	224.13	0	1324500	1	1	1	n. def.	n. def.	1324500	G5E870	G5E870	E3 ubiquitin-protein ligase TRIP12	Trip12
n. def.	n. def.	n. def.								1	1	1	2.8	2.8	2.8	38.878	0.003937	0	1	1	1	20	59	0	O08691	O08691	Arginase-2, mitochondrial	Arg2
5.96058	n. def.	n. def.								1	1	1	7.4	7.4	7.4	45.02	0	21917000	1	1	1	n. def.	n. def.	21917000	O35490	O35490	Betaine--homocysteine S-methyltransferase 1	Bhmt
7.46567	n. def.	n. def.								1	1	1	2.6	2.6	2.6	43.953	0	525940000	1	1	1	127	5	525940000	O54724	O54724	Polymerase I and transcript release factor	Ptrf
6.04579	n. def.	n. def.								1	1	1	3.3	3.3	3.3	60.522	0	34446000	0	1	1	n. def.	n. def.	34446000	O55187	O55187	E3 SUMO-protein ligase CBX4	Cbx4
4.96816	n. def.	n. def.				TCF4				1	1	1	1.9	1.9	1.9	69.04	0	2230300	1	1	1	130	223	2230300	O70230	O70230	Zinc finger protein 143	Znf143
6.0724	n. def.	n. def.								1	1	1	4	4	4	51.588	0	25990000	0	1	1	n. def.	n. def.	25990000	O88597	O88597	Beclin-1	Becn1
5.15128	n. def.	n. def.								1	1	1	0.6	0.6	0.6	247.23	0	13459000	1	1	1	131	1889	13459000	O88783	O88783	Coagulation factor V;Coagulation factor V heavy chain;Coagulation factor V light chain	F5
n. def.	n. def.	n. def.								1	1	1	9.7	9.7	9.7	26.925	0	0	1	1	1	n. def.	n. def.	0	O88983	O88983	Syntaxin-8	Stx8
n. def.	n. def.	n. def.								2	2	2	3.4	3.4	3.4	122.67	0	0	2	2	2	n. def.	n. def.	0	P00520	P00520	Tyrosine-protein kinase ABL1	Abl1
8.5823	8.26562	7.44983						+	+	3	3	3	18.4	18.4	18.4	15.328	0	1528800000	5	3	3	n. def.	n. def.	1528800000	P84244;P84228;P68433;P02301	P84244;P84228;P68433;P02301	Histone H3.3;Histone H3.2;Histone H3.1;Histone H3.3C	H3f3a;Hist1h3b;Hist1h3a;H3f3c
n. def.	n. def.	n. def.								1	1	1	17.2	17.2	17.2	14.377	0	0	1	1	1	n. def.	n. def.	0	P05533	P05533	Lymphocyte antigen 6A-2/6E-1	Ly6a
5.44858	n. def.	n. def.								1	1	1	1.5	1.5	1.5	144.6	0	16293000	0	1	1	210	779	16293000	P06800	P06800	Receptor-type tyrosine-protein phosphatase C	Ptprc
5.21352	4.26557	n. def.						+		1	1	1	0.7	0.7	0.7	279.86	0	22399000	0	1	1	26	1006	22399000	P08032	P08032	Spectrin alpha chain, erythrocytic 1	Spta1
5.0803	n. def.	6.7088							+	1	1	1	2.1	2.1	2.1	60.331	0	3368800	1	1	1	n. def.	n. def.	3368800	P09838	P09838	DNA nucleotidylexotransferase	Dntt
7.60887	7.04321	6.86604						+	+	4	4	4	38.3	38.3	38.3	14.728	0	243790000	11	4	4	n. def.	n. def.	243790000	P62984;P62983;P0CG49;P0CG50	P62984;P62983;P0CG49;P0CG50	Ubiquitin-60S ribosomal protein L40;Ubiquitin;60S ribosomal protein L40;Ubiquitin-40S ribosomal protein S27a;Ubiquitin;40S ribosomal protein S27a;Polyubiquitin-B;Ubiquitin;Polyubiquitin-C;Ubiquitin;Ubiquitin-related 1;Ubiquitin-related 2	Uba52;Rps27a;Ubb;Ubc
5.60942	n. def.	5.54331							+	1	1	1	2.4	2.4	2.4	50.113	0	8543700	1	1	1	n. def.	n. def.	8543700	P10126;P62631	P10126;P62631	Elongation factor 1-alpha 1;Elongation factor 1-alpha 2	Eef1a1;Eef1a2
n. def.	n. def.	n. def.								1	1	1	10.8	10.8	10.8	13.302	0	0	1	1	1	135	43	0	P10400	P10400	Retrovirus-related Pol polyprotein;Reverse transcriptase;Endonuclease	Pol
5.85842	n. def.	n. def.								1	1	1	10.5	10.5	10.5	11.675	0	5052700	2	1	1	n. def.	n. def.	5052700	P10639	P10639	Thioredoxin	Txn
8.51398	8.34429	7.93029						+	+	5	5	5	47.6	47.6	47.6	13.992	0	2286000000	8	5	5	n. def.	n. def.	2286000000	Q8CGP2;Q8CGP1;Q6ZWY9;Q64525;Q64478;Q64475;P10854;P10853;Q9D2U9;Q8CGP0;Q64524;P70696	Q8CGP2;Q8CGP1;Q6ZWY9;Q64525;Q64478;Q64475;P10854;P10853;Q9D2U9;Q8CGP0;Q64524;P70696	Histone H2B type 1-P;Histone H2B type 1-K;Histone H2B type 1-C/E/G;Histone H2B type 2-B;Histone H2B type 1-H;Histone H2B type 1-B;Histone H2B type 1-M;Histone H2B type 1-F/J/L;Histone H2B type 3-A;Histone H2B type 3-B;Histone H2B type 2-E;Histone H2B type 1-A	Hist1h2bp;Hist1h2bk;Hist1h2bc;Hist2h2bb;Hist1h2bh;Hist1h2bb;Hist1h2bm;Hist1h2bf;Hist3h2ba;Hist3h2bb;Hist2h2be;Hist1h2ba
6.0937	n. def.	6.13881							+	2	2	2	7.2	7.2	7.2	20.861	0	6204200	2	2	2	n. def.	n. def.	6204200	P10922	P10922	Histone H1.0;Histone H1.0, N-terminally processed	H1f0
7.67436	7.58491	8.10826						+	+	1	1	1	3	3	3	34.106	0	897660000	1	1	1	n. def.	n. def.	897660000	P11440	P11440	Cyclin-dependent kinase 1	Cdk1
n. def.	n. def.	n. def.								1	1	1	0.3	0.3	0.3	425.83	0	0	1	1	1	136	1858	0	P11531	P11531	Dystrophin	Dmd
5.21719	n. def.	n. def.								1	1	1	1.4	1.4	1.4	116.85	0	9398500	1	1	1	n. def.	n. def.	9398500	P14404	P14404	MDS1 and EVI1 complex locus protein EVI1	Mecom
6.29925	6.30345	n. def.				OLIG2		+		7	7	7	16.5	16.5	16.5	66.785	0	71705000	8	7	7	n. def.	n. def.	71705000	P14733	P14733	Lamin-B1	Lmnb1
7.97081	7.43818	7.51855						+	+	6	3	3	28.8	9.9	9.9	21.266	0	841490000	9	6	3	n. def.	n. def.	841490000	P15864	P15864	Histone H1.2	Hist1h1c
5.49679	n. def.	n. def.							+	1	1	1	1.1	1.1	1.1	119.18	0	18206000	2	1	1	212	485	18206000	P15919	P15919	V(D)J recombination-activating protein 1;Endonuclease RAG1;E3 ubiquitin-protein ligase RAG1	Rag1
4.75728	n. def.	n. def.								1	1	1	1.2	1.2	1.2	67.226	0.0035211	1944300	1	1	1	138	241	1944300	P17141	P17141	Zinc finger protein 37	Zfp37
5.88577	n. def.	n. def.								1	1	1	3.2	3.2	3.2	107.66	0.0037037	40742000	1	1	1	n. def.	n. def.	40742000	P17426	P17426	AP-2 complex subunit alpha-1	Ap2a1
n. def.	n. def.	n. def.								1	1	1	1.2	1.2	1.2	81.594	0	0	1	1	1	139	259	0	P18653	P18653	Ribosomal protein S6 kinase alpha-1	Rps6ka1
5.19424	5.37873	6.38222						+	+	1	1	1	3	3	3	53.687	0	5317700	1	1	1	n. def.	n. def.	5317700	P20152	P20152	Vimentin	Vim
5.99516	n. def.	5.6707				OLIG2			+	1	1	1	7.1	7.1	7.1	20.855	0	6922400	1	1	1	n. def.	n. def.	6922400	P23198	P23198	Chromobox protein homolog 3	Cbx3
4.58285	n. def.	n. def.								1	1	1	1.5	1.5	1.5	128.33	0.0040486	2219600	0	1	1	n. def.	n. def.	2219600	P24063	P24063	Integrin alpha-L	Itgal
6.23144	n. def.	n. def.								1	1	1	7.4	7.4	7.4	32.003	0	23855000	0	1	1	140	18	23855000	P28230	P28230	Gap junction beta-1 protein	Gjb1
5.75263	n. def.	n. def.								1	1	1	1.1	1.1	1.1	130.57	0.0038023	34512000	1	1	1	n. def.	n. def.	34512000	P29477	P29477	Nitric oxide synthase, inducible	Nos2
5.89303	n. def.	6.38222							+	1	1	1	2.3	2.3	2.3	53.497	0	25014000	1	1	1	n. def.	n. def.	25014000	P31001	P31001	Desmin	Des
7.03109	6.46759	7.37337						+	+	5	5	5	30.9	30.9	30.9	21.644	0	75191000	6	5	5	n. def.	n. def.	75191000	P35980	P35980	60S ribosomal protein L18	Rpl18
5.48184	n. def.	n. def.								1	1	1	4.1	4.1	4.1	49.714	0	7278700	0	1	1	27	33	7278700	P36552	P36552	Coproporphyrinogen-III oxidase, mitochondrial	Cpox
8.01912	7.78462	7.77693						+	+	7	7	5	27.9	27.9	15.5	21.977	0	940500000	20	7	5	n. def.	n. def.	940500000	P43274	P43274	Histone H1.4	Hist1h1e
7.79147	7.04844	7.10595						+	+	4	4	4	26.8	26.8	26.8	21.785	0	433090000	7	4	4	n. def.	n. def.	433090000	P43275	P43275	Histone H1.1	Hist1h1a
7.61293	7.45057	7.46666						+	+	7	6	6	27.8	22.4	22.4	22.576	0	369130000	16	7	6	28	18	369130000	P43276	P43276	Histone H1.5	Hist1h1b
7.99487	7.64778	7.54393						+	+	6	4	3	27.6	15.4	9.5	22.099	0	988260000	12	6	3	n. def.	n. def.	988260000	P43277;Q07133	P43277	Histone H1.3	Hist1h1d
5.18977	n. def.	n. def.								1	1	1	5.1	5.1	5.1	24.179	0.0035336	2322000	1	1	1	n. def.	n. def.	2322000	P43431	P43431	Interleukin-12 subunit alpha	Il12a
5.91545	n. def.	7.39879							+	1	1	1	6.9	6.9	6.9	17.587	0	4115500	1	1	1	n. def.	n. def.	4115500	P47915	P47915	60S ribosomal protein L29	Rpl29
6.05239	n. def.	5.97186							+	2	2	2	8.5	8.5	8.5	24.305	0	10154000	2	2	2	n. def.	n. def.	10154000	P47963	P47963	60S ribosomal protein L13	Rpl13
n. def.	n. def.	n. def.								1	1	1	3.3	3.3	3.3	71.376	0.0044444	0	1	1	1	213	541	0	P48025	P48025	Tyrosine-protein kinase SYK	Syk
5.58977	n. def.	n. def.								1	1	1	1.5	1.5	1.5	81.858	0	13998000	1	1	1	n. def.	n. def.	13998000	P48410	P48410	ATP-binding cassette sub-family D member 1	Abcd1
5.8425	5.19512	6.10728						+	+	2	2	2	9.4	9.4	9.4	34.196	0	12525000	2	2	2	n. def.	n. def.	12525000	P49312	P49312	Heterogeneous nuclear ribonucleoprotein A1	Hnrnpa1
n. def.	n. def.	n. def.								1	1	1	1	1	1	102.15	0.0037736	0	1	1	1	n. def.	n. def.	0	P49452	P49452	Centromere protein C 1	Cenpc1
6.13232	n. def.	n. def.								1	1	1	6.8	6.8	6.8	14.893	0	9493300	1	1	1	n. def.	n. def.	9493300	P51880	P51880	Fatty acid-binding protein, brain	Fabp7
n. def.	n. def.	n. def.								1	1	1	1.4	1.4	1.4	86.622	0.0034965	0	1	1	1	33	509	0	P51944	P51944	Cyclin-F	Ccnf
3.96267	n. def.	n. def.								1	1	1	2.4	2.4	2.4	33.974	0	128470	1	1	1	n. def.	n. def.	128470	P52840	P52840	Sulfotransferase 1A1	Sult1a1
6.67688	6.43096	n. def.						+		1	1	1	3	3	3	31.893	0	85537000	1	1	1	34	166	85537000	P53810	P53810	Phosphatidylinositol transfer protein alpha isoform	Pitpna
6.36263	6.47066	n. def.						+		1	1	1	2	2	2	75.474	0	89889000	2	1	1	n. def.	n. def.	89889000	P55096	P55096	ATP-binding cassette sub-family D member 3	Abcd3
5.9526	n. def.	n. def.								1	1	1	14.7	14.7	14.7	12.737	0	5379700	2	1	1	215	40	5379700	P55099	P55099	Tachykinin-3;Neurokinin-B	Tac3
5.37552	n. def.	n. def.								1	1	1	1.1	1.1	1.1	113	0	12108000	1	1	1	n. def.	n. def.	12108000	P57680	P57680	Ellis-van Creveld syndrome protein homolog	Evc
n. def.	n. def.	n. def.								1	1	1	0.6	0.6	0.6	125.2	0	0	1	1	1	n. def.	n. def.	0	P59281	P59281	Rho GTPase-activating protein 39	Arhgap39
5.25101	n. def.	6.32815							+	1	1	1	3.2	3.2	3.2	41.792	0	3564900	1	1	1	n. def.	n. def.	3564900	P63260;P60710;P63268;P68134;P68033;P62737	P63260;P60710;P63268;P68134;P68033;P62737	Actin, cytoplasmic 2;Actin, cytoplasmic 2, N-terminally processed;Actin, cytoplasmic 1;Actin, cytoplasmic 1, N-terminally processed;Actin, gamma-enteric smooth muscle;Actin, alpha skeletal muscle;Actin, alpha cardiac muscle 1;Actin, aortic smooth muscle	Actg1;Actb;Actg2;Acta1;Actc1;Acta2
7.12701	6.48637	n. def.						+		1	1	1	12.6	12.6	12.6	10.871	0	26795000	1	1	1	n. def.	n. def.	26795000	P61957;Q9Z172	P61957;Q9Z172	Small ubiquitin-related modifier 2;Small ubiquitin-related modifier 3	Sumo2;Sumo3
5.54892	n. def.	n. def.								1	1	1	4.4	4.4	4.4	18.431	0	3539300	1	1	1	n. def.	n. def.	3539300	P62281	P62281	40S ribosomal protein S11	Rps11
n. def.	n. def.	n. def.								1	1	1	4.6	4.6	4.6	17.222	0	0	1	1	1	n. def.	n. def.	0	P62301	P62301	40S ribosomal protein S13	Rps13
7.92442	7.42594	8.58837						+	+	10	10	10	61.2	61.2	61.2	11.367	0	504160000	16	10	10	n. def.	n. def.	504160000	P62806	P62806	Histone H4	Hist1h4a
6.19975	n. def.	6.48909							+	3	3	3	22.7	22.7	22.7	35.73	0	20592000	6	3	3	n. def.	n. def.	20592000	P62960	P62960	Nuclease-sensitive element-binding protein 1	Ybx1
n. def.	n. def.	n. def.								1	1	1	2	2	2	65.514	0.0042373	0	1	1	1	n. def.	n. def.	0	P70303	P70303	CTP synthase 2	Ctps2
n. def.	n. def.	n. def.								1	1	1	0.6	0.6	0.6	153.49	0	0	1	1	1	n. def.	n. def.	0	P70388	P70388	DNA repair protein RAD50	Rad50
5.34858	n. def.	n. def.								1	1	1	5.3	5.3	5.3	66.959	0.0036232	5132100	1	1	1	n. def.	n. def.	5132100	P70389	P70389	Insulin-like growth factor-binding protein complex acid labile subunit	Igfals
n. def.	n. def.	n. def.								1	1	1	0.6	0.6	0.6	290.71	0	0	1	1	1	145	1327	0	P70398	P70398	Probable ubiquitin carboxyl-terminal hydrolase FAF-X	Usp9x
5.87054	n. def.	n. def.								1	1	1	6	6	6	24.802	0	9649200	3	1	1	n. def.	n. def.	9649200	P70425	P70425	GTP-binding protein Rit2	Rit2
5.32584	n. def.	n. def.								2	2	2	2.7	2.7	2.7	220.5	0	21600000	2	2	2	n. def.	n. def.	21600000	P70670	P70670	Nascent polypeptide-associated complex subunit alpha, muscle-specific form	Naca
n. def.	n. def.	n. def.								1	1	1	0.3	0.3	0.3	291.46	0	0	1	1	1	n. def.	n. def.	0	P97499	P97499	Telomerase protein component 1	Tep1
4.89058	n. def.	n. def.								1	1	1	2.3	2.3	2.3	111.67	0.0039526	4041900	1	1	1	n. def.	n. def.	4041900	P98063	P98063	Bone morphogenetic protein 1	Bmp1
4.69004	n. def.	n. def.								1	1	1	1.5	1.5	1.5	53.255	0.0040161	1175600	1	1	1	n. def.	n. def.	1175600	Q00493	Q00493	Carboxypeptidase E	Cpe
4.44325	n. def.	6.2377							+	1	1	1	1.6	1.6	1.6	81.8	0	1276500	1	1	1	n. def.	n. def.	1276500	Q02257	Q02257	Junction plakoglobin	Jup
n. def.	n. def.	n. def.								1	1	1	1.7	1.7	1.7	153.12	0	0	1	1	1	n. def.	n. def.	0	Q02384	Q02384	Son of sevenless homolog 2	Sos2
5.33923	n. def.	n. def.								1	1	1	2.9	2.9	2.9	94.201	0	6770100	0	1	1	n. def.	n. def.	6770100	Q03385	Q03385	Ral guanine nucleotide dissociation stimulator	Ralgds
5.38632	n. def.	n. def.								1	1	1	1.3	1.3	1.3	59.651	0.0044248	5354900	1	1	1	n. def.	n. def.	5354900	Q0VBL1	Q0VBL1	Tigger transposable element-derived protein 2	Tigd2
5.83165	n. def.	n. def.								1	1	1	1.3	1.3	1.3	71.037	0	15609000	1	1	1	n. def.	n. def.	15609000	Q149C2	Q149C2	TRAF3-interacting protein 1	Traf3ip1
n. def.	n. def.	n. def.								1	1	1	9.7	9.7	9.7	12.809	0.0036496	0	1	1	1	n. def.	n. def.	0	Q307W7	Q307W7	Kinocilin	Kncn
n. def.	n. def.	n. def.								1	1	1	0.4	0.4	0.4	303.65	0	0	1	1	1	n. def.	n. def.	0	Q3KNY0	Q3KNY0	Immunoglobulin-like and fibronectin type III domain-containing protein 1	Igfn1
6.15591	n. def.	n. def.							+	1	1	1	3.3	3.3	3.3	73.51	0	35798000	1	1	1	38	383	35798000	Q3TRR0	Q3TRR0	Microtubule-associated protein 9	Map9
5.41312	n. def.	n. def.								1	1	1	0.8	0.8	0.8	164.74	0.0044053	15792000	1	1	1	219	797	15792000	Q3U1Y4	Q3U1Y4	DENN domain-containing protein 4B	Dennd4b
5.97422	n. def.	n. def.								1	1	1	2.7	2.7	2.7	70.07	0	32040000	1	1	1	n. def.	n. def.	32040000	Q3U2E2	Q3U2E2	Zinc finger MYM-type protein 5	Zmym5
n. def.	n. def.	n. def.								1	1	1	3.6	3.6	3.6	40.139	0	0	1	1	1	n. def.	n. def.	0	Q3UGP9	Q3UGP9	Leucine-rich repeat-containing protein 58	Lrrc58
4.72387	n. def.	n. def.								1	1	1	0.8	0.8	0.8	227.52	0.0034364	3653600	0	1	1	n. def.	n. def.	3653600	Q3UH66	Q3UH66	Serine/threonine-protein kinase WNK2	Wnk2
n. def.	n. def.	n. def.								1	1	1	1.4	1.4	1.4	103.35	0.0041841	0	1	1	1	n. def.	n. def.	0	Q3UHJ0	Q3UHJ0	AP2-associated protein kinase 1	Aak1
4.4477	n. def.	n. def.								1	1	1	0.3	0.3	0.3	282.52	0.0040984	3139900	1	1	1	n. def.	n. def.	3139900	Q3UHR0	Q3UHR0	BAH and coiled-coil domain-containing protein 1	Bahcc1
6.5725	6.42441	n. def.						+		1	1	1	2.4	2.4	2.4	62.018	0	100890000	2	1	1	n. def.	n. def.	100890000	Q3UHZ5	Q3UHZ5	Leiomodin-2	Lmod2
n. def.	n. def.	n. def.								1	1	1	1.7	1.7	1.7	133.57	0.004	0	1	1	1	n. def.	n. def.	0	Q3UPL0	Q3UPL0	Protein transport protein Sec31A	Sec31a
n. def.	n. def.	n. def.								1	1	1	0.5	0.5	0.5	195.53	0	0	1	1	1	n. def.	n. def.	0	Q3UU96	Q3UU96	Serine/threonine-protein kinase MRCK alpha	Cdc42bpa
7.6178	7.48159	7.04348						+	+	1	1	1	0.8	0.8	0.8	136.77	0	2654500000	2	1	1	n. def.	n. def.	2654500000	Q3UVR3	Q3UVR3	Tau-tubulin kinase 2	Ttbk2
n. def.	n. def.	n. def.								1	1	1	2.8	2.8	2.8	50.54	0	0	1	1	1	50	213	0	Q3V0Q6	Q3V0Q6		Spag8
7.62492	7.67261	n. def.						+		1	1	1	3.1	3.1	3.1	88.482	0	1349200000	0	1	1	n. def.	n. def.	1349200000	Q499E0;Q6DFY8	Q499E0;Q6DFY8	Protein FAM5C;Protein FAM5B	Fam5c;Fam5b
6.3941	6.38575	n. def.						+		1	1	1	1.3	1.3	1.3	185.39	0	190800000	1	1	1	n. def.	n. def.	190800000	Q4ACU6	Q4ACU6	SH3 and multiple ankyrin repeat domains protein 3	Shank3
5.16909	n. def.	n. def.								1	1	1	2.1	2.1	2.1	135.24	0.0037879	7675200	1	1	1	n. def.	n. def.	7675200	Q4VC17	Q4VC17	A disintegrin and metalloproteinase with thrombospondin motifs 18	Adamts18
4.24269	n. def.	n. def.								1	1	1	0.8	0.8	0.8	98.714	0.0043478	804370	1	1	1	n. def.	n. def.	804370	Q5DTN8	Q5DTN8	Janus kinase and microtubule-interacting protein 3	Jakmip3
n. def.	n. def.	n. def.								1	1	1	3.4	3.4	3.4	92.578	0	0	1	1	1	n. def.	n. def.	0	Q5STE3	Q5STE3	Follistatin-related protein 4	Fstl4
6.93225	7.49894	n. def.						+	+	1	1	1	1.8	1.8	1.8	70.641	0	248110000	1	1	1	158	87	248110000	Q5SVQ0	Q5SVQ0	Histone acetyltransferase KAT7	Kat7
5.19454	n. def.	n. def.								1	1	1	0.8	0.8	0.8	238.59	0.003413	12834000	0	1	1	n. def.	n. def.	12834000	Q5SWW4	Q5SWW4	Mediator of RNA polymerase II transcription subunit 13	Med13
4.75233	n. def.	n. def.								1	1	1	2.8	2.8	2.8	44.894	0.0043668	904590	1	1	1	159	13	904590	Q5SZT7	Q5SZT7		Nkapl
5.01616	n. def.	n. def.								1	1	1	2.8	2.8	2.8	79.83	0	2802400	0	1	1	n. def.	n. def.	2802400	Q5U3K5	Q5U3K5	Rab-like protein 6	Rabl6
5.6462	n. def.	n. def.								1	1	1	3.9	3.9	3.9	38.354	0	5756200	1	1	1	n. def.	n. def.	5756200	Q60668	Q60668	Heterogeneous nuclear ribonucleoprotein D0	Hnrnpd
5.42882	n. def.	n. def.				OLIG2	+			2	2	2	5.1	5.1	5.1	71.624	0	6978900	1	2	2	n. def.	n. def.	6978900	Q60722	Q60722	Transcription factor 4	Tcf4
5.40252	4.95333	n. def.						+		1	1	1	1.2	1.2	1.2	155.79	0	17180000	1	1	1	n. def.	n. def.	17180000	Q60751	Q60751	Insulin-like growth factor 1 receptor;Insulin-like growth factor 1 receptor alpha chain;Insulin-like growth factor 1 receptor beta chain	Igf1r
5.06498	n. def.	n. def.								1	1	1	1.5	1.5	1.5	59.434	0	2555000	1	1	1	n. def.	n. def.	2555000	Q60764	Q60764	Probable E3 ubiquitin-protein ligase makorin-3	Mkrn3
5.36683	n. def.	n. def.								1	1	1	1.4	1.4	1.4	95.986	0.0042918	12102000	1	1	1	n. def.	n. def.	12102000	Q60790	Q60790	Ras GTPase-activating protein 3	Rasa3
5.27332	n. def.	n. def.								1	1	1	3.3	3.3	3.3	47.655	0	2627000	1	1	1	n. def.	n. def.	2627000	Q60972	Q60972	Histone-binding protein RBBP4	Rbbp4
4.80874	n. def.	n. def.								1	1	1	4.9	4.9	4.9	43.893	0.0034843	1223200	1	1	1	n. def.	n. def.	1223200	Q61362	Q61362	Chitinase-3-like protein 1	Chi3l1
5.09381	n. def.	n. def.								1	1	1	1	1	1	218.13	0	11046000	0	1	1	162	1456	11046000	Q61464	Q61464	Zinc finger protein 638	Znf638
7.69059	7.57341	8.31551						+	+	1	1	1	2.2	2.2	2.2	71.726	0.0041322	1716500000	1	1	1	n. def.	n. def.	1716500000	Q61510	Q61510	E3 ubiquitin/ISG15 ligase TRIM25	Trim25
4.06491	n. def.	n. def.								1	1	1	3	3	3	66.579	0.0035461	290310	0	1	1	n. def.	n. def.	290310	Q61762	Q61762	Potassium voltage-gated channel subfamily A member 5	Kcna5
5.84529	n. def.	n. def.								1	1	1	0.5	0.5	0.5	228.99	0	71432000	2	1	1	n. def.	n. def.	71432000	Q61879	Q61879	Myosin-10	Myh10
5.28463	n. def.	n. def.								1	1	1	5	5	5	38.821	0	3851800	0	1	1	163	107	3851800	Q62314	Q62314	Trans-Golgi network integral membrane protein 2	Tgoln2
5.65547	n. def.	4.95581							+	3	3	3	5.6	5.6	5.6	88.846	0	14927000	4	3	3	n. def.	n. def.	14927000	Q62318	Q62318	Transcription intermediary factor 1-beta	Trim28
n. def.	n. def.	n. def.								1	1	1	1.2	1.2	1.2	146.41	0.0042553	0	1	1	1	n. def.	n. def.	0	Q64331	Q64331	Unconventional myosin-VI	Myo6
n. def.	n. def.	n. def.								1	1	1	1.8	1.8	1.8	99.802	0	0	1	1	1	166	616	0	Q65CL1	Q65CL1	Catenin alpha-3	Ctnna3
n. def.	n. def.	n. def.								1	1	1	1.9	1.9	1.9	74.817	0.004386	0	1	1	1	53	164	0	Q68FG3	Q68FG3	Protein SPT2 homolog	Spty2d1
4.70065	n. def.	n. def.								1	1	1	0.8	0.8	0.8	290.08	0	6424900	0	1	1	54	739	6424900	Q69ZR2	Q69ZR2	E3 ubiquitin-protein ligase HECTD1	Hectd1
n. def.	n. def.	n. def.								1	1	1	1.3	1.3	1.3	71.064	0	0	1	1	1	55	280	0	Q6IQY5	Q6IQY5	Centrosomal protein of 70 kDa	Cep70
n. def.	n. def.	n. def.								1	1	1	1.9	1.9	1.9	83.158	0.0035714	0	1	1	1	n. def.	n. def.	0	Q6NS69	Q6NS69	APC membrane recruitment protein 3	Amer3
n. def.	n. def.	n. def.								1	1	1	2.6	2.6	2.6	63.213	0	0	1	1	1	n. def.	n. def.	0	Q6NSV7	Q6NSV7	Protein FAM149B1	Fam149b1
n. def.	n. def.	n. def.								1	1	1	2.1	2.1	2.1	72.787	0	0	1	1	1	59	141	0	Q6NVG7	Q6NVG7	Procollagen galactosyltransferase 2	Colgalt2
n. def.	n. def.	n. def.								1	1	1	1	1	1	150.21	0	0	1	1	1	168	1176	0	Q6NWW5	Q6NWW5	Kinesin-like protein KIF24	Kif24
7.27685	7.23694	7.63973						+	+	1	1	1	0.7	0.7	0.7	161	0	1343100000	4	1	1	n. def.	n. def.	1343100000	Q6P2L6	Q6P2L6	Histone-lysine N-methyltransferase NSD3	Whsc1l1
n. def.	n. def.	n. def.								1	1	1	1.5	1.5	1.5	87.021	0	0	1	1	1	60	4	0	Q6PB90	Q6PB90	Protocadherin beta-14	Pcdhb14
5.72494	n. def.	n. def.								1	1	1	6.2	6.2	6.2	59.965	0.0037594	12739000	1	1	1	n. def.	n. def.	12739000	Q80X89;Q6PDD0	Q80X89;Q6PDD0	UDP-glucuronosyltransferase 2A1;UDP-glucuronosyltransferase 2A2	Ugt2a1;Ugt2a2
n. def.	n. def.	n. def.							+	1	1	1	1.7	1.7	1.7	99.337	0.003268	0	1	1	1	n. def.	n. def.	0	Q6PFE3	Q6PFE3	DNA repair and recombination protein RAD54B	Rad54b
6.84425	n. def.	n. def.					+			4	1	1	13.2	4.4	4.4	29.506	0	83835000	6	4	1	n. def.	n. def.	83835000	Q6PFG8	Q6PFG8	Oligodendrocyte transcription factor 3	Olig3
n. def.	n. def.	n. def.								1	1	1	1.6	1.6	1.6	55.661	0	0	1	1	1	169	112	0	Q6PFY9	Q6PFY9	Dual specificity protein phosphatase CDC14B	Cdc14b
5.64861	n. def.	n. def.								1	1	1	2.5	2.5	2.5	91.785	0	18701000	0	1	1	n. def.	n. def.	18701000	Q6PGF3	Q6PGF3	Mediator of RNA polymerase II transcription subunit 16	Med16
n. def.	n. def.	n. def.								1	1	1	0.2	0.2	0.2	1009.9	0	0	2	1	1	61	2195	0	Q6ZWR6	Q6ZWR6	Nesprin-1	Syne1
4.14619	n. def.	n. def.								1	1	1	1.4	1.4	1.4	85.638	0	518080	1	1	1	n. def.	n. def.	518080	Q70UZ7	Q70UZ7	von Willebrand factor A domain-containing protein 2	Vwa2
4.44397	n. def.	n. def.								1	1	1	1.8	1.8	1.8	42.83	0.0034602	611480	1	1	1	n. def.	n. def.	611480	Q78T81	Q78T81	Protein FAM102A	Fam102a
5.57834	n. def.	n. def.								1	1	1	5.6	5.6	5.6	36.764	0	4923600	1	1	1	223	34	4923600	Q7TMM8	Q7TMM8	Mono [ADP-ribose] polymerase PARP16	Parp16
5.22632	n. def.	n. def.								1	1	1	2.8	2.8	2.8	76.184	0.003367	4041300	0	1	1	n. def.	n. def.	4041300	Q7TMV1	Q7TMV1	E3 ubiquitin-protein ligase RNF139	Rnf139
n. def.	n. def.	n. def.						+		1	1	1	0.3	0.3	0.3	517.73	0	0	1	1	1	n. def.	n. def.	0	Q7TPH6	Q7TPH6	Probable E3 ubiquitin-protein ligase MYCBP2	Mycbp2
n. def.	n. def.	n. def.								1	1	1	1.5	1.5	1.5	54.863	0	0	1	1	1	n. def.	n. def.	0	Q7TPM3	Q7TPM3	E3 ubiquitin-protein ligase TRIM17	Trim17
n. def.	n. def.	n. def.								1	1	1	1.1	1.1	1.1	67.811	0	0	1	1	1	n. def.	n. def.	0	Q7TPN9	Q7TPN9	Proline-rich protein 14	Prr14
5.1038	n. def.	n. def.								1	1	1	4.3	4.3	4.3	46.274	0	2540000	0	1	1	67	257	2540000	Q7TPQ9	Q7TPQ9	Arrestin domain-containing protein 3	Arrdc3
7.12431	n. def.	n. def.								1	1	1	5.8	5.8	5.8	19.086	0	106510000	1	1	1	n. def.	n. def.	106510000	Q7TQJ1	Q7TQJ1	MARVEL domain-containing protein 1	Marveld1
n. def.	n. def.	n. def.								1	1	1	1.3	1.3	1.3	96.449	0.0042194	0	1	1	1	n. def.	n. def.	0	Q7TSJ2	Q7TSJ2	Microtubule-associated protein 6	Map6
3.1749	n. def.	n. def.								1	1	1	0.3	0.3	0.3	280.81	0.0042017	186980	1	1	1	n. def.	n. def.	186980	Q80SU7	Q80SU7	Interferon-induced very large GTPase 1	Gvin1
4.74054	n. def.	n. def.								1	1	1	1.8	1.8	1.8	76.406	0	2090900	0	1	1	n. def.	n. def.	2090900	Q80TS7	Q80TS7	Dendrin	Ddn
n. def.	n. def.	n. def.								1	1	1	2	2	2	102.3	0	0	1	1	1	n. def.	n. def.	0	Q80TZ3	Q80TZ3	Putative tyrosine-protein phosphatase auxilin	Dnajc6
6.03914	n. def.	n. def.								1	1	1	1.4	1.4	1.4	122.61	0	62374000	2	1	1	74	108	62374000	Q80U87	Q80U87	Ubiquitin carboxyl-terminal hydrolase 8	Usp8
4.62308	n. def.	n. def.								1	1	1	0.4	0.4	0.4	212.56	0.0039841	3946500	1	1	1	n. def.	n. def.	3946500	Q80UG2	Q80UG2	Plexin-A4	Plxna4
5.39492	5.88611	6.25137						+	+	1	1	1	0.5	0.5	0.5	145.14	0	17876000	1	1	1	226	1214	17876000	Q80VA5	Q80VA5	SH3 domain and tetratricopeptide repeat-containing protein 2	Sh3tc2
n. def.	n. def.	n. def.								1	1	1	1.2	1.2	1.2	65.426	0	0	1	1	1	n. def.	n. def.	0	Q80W40	Q80W40	Acyl-coenzyme A synthetase ACSM4, mitochondrial	Acsm4
5.44903	n. def.	n. def.								1	1	1	2.7	2.7	2.7	68.891	0.0033445	8155000	0	1	1	n. def.	n. def.	8155000	Q80WJ1	Q80WJ1	Gametogenetin	Ggn
n. def.	n. def.	n. def.								1	1	1	1	1	1	78.75	0	0	1	1	1	n. def.	n. def.	0	Q80X44	Q80X44	Zinc finger and BTB domain-containing protein 24	Zbtb24
n. def.	n. def.	n. def.								1	1	1	1.5	1.5	1.5	100.3	0.0041667	0	1	1	1	n. def.	n. def.	0	Q80XR2	Q80XR2	Calcium-transporting ATPase type 2C member 1	Atp2c1
5.89458	n. def.	n. def.								1	1	1	1.5	1.5	1.5	139.8	0	44715000	1	1	1	75	666	44715000	Q80YF9	Q80YF9	Rho GTPase-activating protein 33	Arhgap33
5.94514	n. def.	n. def.								1	1	1	3.4	3.4	3.4	46.83	0	21152000	1	1	1	n. def.	n. def.	21152000	Q80YG3	Q80YG3	Kelch domain-containing protein 1	Klhdc1
n. def.	n. def.	n. def.								1	1	1	1.2	1.2	1.2	124.42	0.003876	0	1	1	1	n. def.	n. def.	0	Q812A2	Q812A2	SLIT-ROBO Rho GTPase-activating protein 3	Srgap3
5.32658	n. def.	n. def.								1	1	1	1.8	1.8	1.8	43.371	0.0038314	3393900	1	1	1	n. def.	n. def.	3393900	Q8BFV3	Q8BFV3	Dual specificity protein phosphatase 4	Dusp4
6.22235	n. def.	n. def.								1	1	1	2.5	2.5	2.5	63.391	0	35040000	1	1	1	181	75	35040000	Q8BGD6	Q8BGD6	Putative sodium-coupled neutral amino acid transporter 9	Slc38a9
6.58157	n. def.	n. def.								1	1	1	4.9	4.9	4.9	55.357	0	91578000	1	1	1	n. def.	n. def.	91578000	Q8BHT6	Q8BHT6	Beta-1,3-glucosyltransferase	B3galtl
8.13663	n. def.	n. def.								1	1	1	10.7	10.7	10.7	34.393	0.0037313	821830000	1	1	1	n. def.	n. def.	821830000	Q8BJZ3	Q8BJZ3	Protein lifeguard 3	Tmbim1
n. def.	n. def.	n. def.								1	1	1	4.2	4.2	4.2	21.311	0	0	1	1	1	n. def.	n. def.	0	Q8BK08	Q8BK08	Transmembrane protein 11, mitochondrial	Tmem11
5.32073	n. def.	n. def.								1	1	1	3.3	3.3	3.3	55.983	0	5650600	2	1	1	n. def.	n. def.	5650600	Q8BK67	Q8BK67	Protein RCC2	Rcc2
n. def.	n. def.	n. def.								1	1	1	0.9	0.9	0.9	87.441	0.0040816	0	1	1	1	n. def.	n. def.	0	Q8BKT3	Q8BKT3	GC-rich sequence DNA-binding factor 2	Gcfc2
n. def.	n. def.	n. def.								1	1	1	2.9	2.9	2.9	91.612	0	0	1	1	1	n. def.	n. def.	0	Q8BMQ2	Q8BMQ2	General transcription factor 3C polypeptide 4	Gtf3c4
4.64401	n. def.	n. def.								1	1	1	1.1	1.1	1.1	83.193	0	1542000	1	1	1	n. def.	n. def.	1542000	Q8C167	Q8C167	Prolyl endopeptidase-like	Prepl
5.96877	n. def.	n. def.								1	1	1	5.1	5.1	5.1	64.154	0.0039216	26057000	1	1	1	n. def.	n. def.	26057000	Q8C208	Q8C208	Zinc finger protein Eos	Ikzf4
7.6351	n. def.	n. def.								1	1	1	1.2	1.2	1.2	134.42	0.0038462	2589700000	1	1	1	n. def.	n. def.	2589700000	Q8C419	Q8C419	Probable G-protein coupled receptor 158	Gpr158
n. def.	n. def.	n. def.								1	1	1	1.2	1.2	1.2	64.882	0	0	1	1	1	n. def.	n. def.	0	Q8C6Y6	Q8C6Y6	Ankyrin repeat and SOCS box protein 14	Asb14
4.6991	n. def.	n. def.								1	1	1	0.7	0.7	0.7	115.38	0.0038168	2350700	1	1	1	n. def.	n. def.	2350700	Q8C761	Q8C761	WD repeat-containing protein 60	Wdr60
n. def.	n. def.	n. def.								1	1	1	1.6	1.6	1.6	54.007	0	0	1	1	1	n. def.	n. def.	0	Q8C817	Q8C817	Transmembrane protein 200A	Tmem200a
4.67804	n. def.	n. def.								1	1	1	4	4	4	59.106	0	1572400	0	1	1	n. def.	n. def.	1572400	Q8CB14	Q8CB14	Lung adenoma susceptibility protein 2	Las2
4.57371	n. def.	n. def.								1	1	1	0.9	0.9	0.9	126.34	0	2473100	1	1	1	n. def.	n. def.	2473100	Q8CBD1	Q8CBD1	Nuclear receptor-interacting protein 1	Nrip1
4.96631	n. def.	n. def.								1	1	1	3.4	3.4	3.4	72.597	0	2961200	1	1	1	n. def.	n. def.	2961200	Q8CDG5	Q8CDG5	CREB3 regulatory factor	Crebrf
7.10171	n. def.	n. def.								1	1	1	3.4	3.4	3.4	87.772	0	480270000	1	1	1	185	516	480270000	Q8CDU6	Q8CDU6	Probable E3 ubiquitin-protein ligase HECTD2	Hectd2
n. def.	n. def.	n. def.								1	1	1	1.8	1.8	1.8	77.095	0.0033223	0	1	1	1	n. def.	n. def.	0	Q8CI03	Q8CI03	FLYWCH-type zinc finger-containing protein 1	Flywch1
5.34248	n. def.	n. def.								1	1	1	2	2	2	52.202	0	5720900	0	1	1	187	249	5720900	Q8CI52	Q8CI52	GRAM domain-containing protein 1C	Gramd1c
7.42949	n. def.	n. def.								1	1	1	2.1	2.1	2.1	62.535	0	967840000	1	1	1	n. def.	n. def.	967840000	Q8CJ67	Q8CJ67	Double-stranded RNA-binding protein Staufen homolog 2	Stau2
n. def.	n. def.	n. def.								1	1	1	5.7	5.7	5.7	23.952	0	0	1	1	1	188	52	0	Q8JZS9	Q8JZS9	39S ribosomal protein L48, mitochondrial	Mrpl48
5.03068	n. def.	5.11133							+	1	1	1	0.7	0.7	0.7	137.64	0	6654000	1	1	1	n. def.	n. def.	6654000	Q8K1G2	Q8K1G2	Limbin	Evc2
n. def.	n. def.	n. def.								1	1	1	1.8	1.8	1.8	81.703	0	0	1	1	1	86	323	0	Q8K2H4	Q8K2H4	Arf-GAP with coiled-coil, ANK repeat and PH domain-containing protein 1	Acap1
4.88912	n. def.	n. def.								1	1	1	1	1	1	149.32	0	5810100	1	1	1	87	1283	5810100	Q8K368	Q8K368	Fanconi anemia group I protein homolog	Fanci
n. def.	n. def.	n. def.								1	1	1	2.4	2.4	2.4	50.934	0	0	1	1	1	189	381	0	Q8R071	Q8R071	Inositol-trisphosphate 3-kinase A	Itpka
5.04583	n. def.	n. def.				OLIG2				1	1	1	0.9	0.9	0.9	102.61	0	4334100	1	1	1	n. def.	n. def.	4334100	Q8R3B7	Q8R3B7	Bromodomain-containing protein 8	Brd8
5.13761	n. def.	n. def.								1	1	1	3.2	3.2	3.2	47.357	0	3020100	0	1	1	n. def.	n. def.	3020100	Q8R3J4	Q8R3J4	mTERF domain-containing protein 1, mitochondrial	Mterfd1
n. def.	n. def.	n. def.								1	1	1	9	9	9	16.665	0	0	1	1	1	n. def.	n. def.	0	Q8R3Q6	Q8R3Q6	Coiled-coil domain-containing protein 58	Ccdc58
7.05641	n. def.	n. def.								1	1	1	2.9	2.9	2.9	37.277	0	136640000	1	1	1	n. def.	n. def.	136640000	Q8R4Y0	Q8R4Y0	Fc receptor-like protein 1	Fcrl1
5.7616	n. def.	n. def.								1	1	1	10.6	10.6	10.6	37.621	0	12129000	1	1	1	n. def.	n. def.	12129000	Q8VBX4	Q8VBX4	C-type lectin domain family 4 member K	Cd207
5.94555	5.96611	n. def.						+		1	1	1	4.7	4.7	4.7	38.86	0	15879000	1	1	1	n. def.	n. def.	15879000	Q8VD66	Q8VD66	Abhydrolase domain-containing protein 4	Abhd4
n. def.	n. def.	n. def.								1	1	1	1.3	1.3	1.3	88.303	0	0	1	1	1	n. def.	n. def.	0	Q8VDF2	Q8VDF2	E3 ubiquitin-protein ligase UHRF1	Uhrf1
6.39063	n. def.	n. def.								1	1	1	3.5	3.5	3.5	35.207	0.0042735	49166000	1	1	1	n. def.	n. def.	49166000	Q8VDN4	Q8VDN4	Coiled-coil domain-containing protein 92	Ccdc92
n. def.	n. def.	n. def.								1	1	1	1.6	1.6	1.6	49.067	0	0	1	1	1	n. def.	n. def.	0	Q8VDW0;Q9Z1N5	Q8VDW0;Q9Z1N5	ATP-dependent RNA helicase DDX39A;Spliceosome RNA helicase Ddx39b	Ddx39a;Ddx39b
4.94127	n. def.	5.33947							+	1	1	1	2.7	2.7	2.7	55.979	0	1222900	1	1	1	n. def.	n. def.	1222900	Q8VE97	Q8VE97	Serine/arginine-rich splicing factor 4	Srsf4
n. def.	n. def.	n. def.								1	1	1	5.6	5.6	5.6	24.074	0	0	1	1	1	90	100	0	Q8VEL0	Q8VEL0	Motile sperm domain-containing protein 1	Mospd1
5.35178	n. def.	n. def.								1	1	1	1.4	1.4	1.4	119.27	0	10340000	1	1	1	190	778	10340000	Q8VI75	Q8VI75	Importin-4	Ipo4
n. def.	n. def.	n. def.							+	1	1	1	2.1	2.1	2.1	75.441	0	0	1	1	1	n. def.	n. def.	0	Q8VIJ6	Q8VIJ6	Splicing factor, proline- and glutamine-rich	Sfpq
5.87094	n. def.	n. def.								1	1	1	3.2	3.2	3.2	63.617	0.0033557	19316000	0	1	1	n. def.	n. def.	19316000	Q8VIJ8	Q8VIJ8	Nitrogen permease regulator 3-like protein	Nprl3
n. def.	n. def.	n. def.								1	1	1	2.6	2.6	2.6	29.889	0	0	1	1	1	191	153	0	Q8VIL2	Q8VIL2	RWD domain-containing protein 3	Rwdd3
n. def.	n. def.	n. def.								1	1	1	2.3	2.3	2.3	43.061	0	0	1	1	1	229	142	0	Q91V45	Q91V45	KiSS-1 receptor	Kiss1r
n. def.	n. def.	n. def.								1	1	1	2	2	2	120.81	0.004065	0	1	1	1	n. def.	n. def.	0	Q91V83	Q91V83	TELO2-interacting protein 1 homolog	Tti1
n. def.	n. def.	n. def.								1	1	1	6.1	6.1	6.1	16.649	0	0	1	1	1	n. def.	n. def.	0	Q91VC7	Q91VC7	Protein phosphatase 1 regulatory subunit 14A	Ppp1r14a
5.57812	n. def.	n. def.								1	1	1	4.5	4.5	4.5	79.776	0.0035842	15899000	1	1	1	n. def.	n. def.	15899000	Q91VD9	Q91VD9	NADH-ubiquinone oxidoreductase 75 kDa subunit, mitochondrial	Ndufs1
6.11591	n. def.	n. def.						+		1	1	1	5	5	5	35.286	0	19589000	1	1	1	n. def.	n. def.	19589000	Q91XE4	Q91XE4	Aspartoacylase-2	Acy3
4.15073	n. def.	n. def.								1	1	1	0.3	0.3	0.3	541.23	0	3692900	1	1	1	92	3847	3692900	Q91XQ0	Q91XQ0	Dynein heavy chain 8, axonemal	Dnahc8
n. def.	n. def.	n. def.								1	1	1	0.7	0.7	0.7	119.82	0	0	1	1	1	n. def.	n. def.	0	Q920B9	Q920B9	FACT complex subunit SPT16	Supt16h
6.29128	n. def.	n. def.								1	1	1	0.4	0.4	0.4	259.23	0	217070000	1	1	1	n. def.	n. def.	217070000	Q921C3	Q921C3	Bromodomain and WD repeat-containing protein 1	Brwd1
5.85962	n. def.	n. def.								1	1	1	7.7	7.7	7.7	48.1	0	12305000	1	1	1	n. def.	n. def.	12305000	Q922R8	Q922R8	Protein disulfide-isomerase A6	Pdia6
4.75847	n. def.	n. def.								1	1	1	1	1	1	212.4	0	5562100	0	1	1	n. def.	n. def.	5562100	Q923J1	Q923J1	Transient receptor potential cation channel subfamily M member 7	Trpm7
n. def.	n. def.	n. def.								1	1	1	0.8	0.8	0.8	140.92	0	0	1	1	1	n. def.	n. def.	0	Q923P0	Q923P0	Collagen alpha-1(XX) chain	Col20a1
n. def.	n. def.	n. def.								1	1	1	1.5	1.5	1.5	96.789	0.0043103	0	1	1	1	n. def.	n. def.	0	Q923W1	Q923W1	Trimethylguanosine synthase	Tgs1
5.1456	n. def.	n. def.				OLIG2				4	4	4	5.2	5.2	5.2	141.03	0	8949300	4	4	4	n. def.	n. def.	8949300	Q925H1	Q925H1	Zinc finger transcription factor Trps1	Trps1
5.98141	n. def.	n. def.								1	1	1	4.6	4.6	4.6	30.831	0	12455000	2	1	1	n. def.	n. def.	12455000	Q99020	Q99020	Heterogeneous nuclear ribonucleoprotein A/B	Hnrnpab
4.96032	n. def.	n. def.								1	1	1	0.5	0.5	0.5	215.54	0.0041152	8670500	1	1	1	233	1016	8670500	Q99104	Q99104	Unconventional myosin-Va	Myo5a
n. def.	n. def.	n. def.								1	1	1	3.7	3.7	3.7	46.3	0.0039683	0	1	1	1	n. def.	n. def.	0	Q99J08	Q99J08	SEC14-like protein 2	Sec14l2
n. def.	n. def.	n. def.								1	1	1	3.4	3.4	3.4	52.284	0.003663	0	1	1	1	n. def.	n. def.	0	Q99J85	Q99J85	Neuronal pentraxin receptor	Nptxr
6.10343	n. def.	n. def.								1	1	1	2.3	2.3	2.3	33.336	0	13958000	1	1	1	97	174	13958000	Q99JB0	Q99JB0	Krueppel-like factor 7	Klf7
5.54469	n. def.	n. def.								1	1	1	4.2	4.2	4.2	41.413	0	5958400	1	1	1	n. def.	n. def.	5958400	Q99MT7	Q99MT7	G-protein coupled receptor 87	Gpr87
n. def.	n. def.	n. def.					+			1	1	1	0.5	0.5	0.5	331.33	0.0037453	0	1	1	1	n. def.	n. def.	0	Q99MY8	Q99MY8	Histone-lysine N-methyltransferase ASH1L	Ash1l
n. def.	n. def.	n. def.								1	1	1	1.4	1.4	1.4	57.827	0	0	1	1	1	n. def.	n. def.	0	Q99N64	Q99N64	Putative germ cell-less protein-like 1-like	GMCL1P1
8.27439	n. def.	7.96634							+	1	1	1	7.6	7.6	7.6	16.499	0	1128600000	1	1	1	n. def.	n. def.	1128600000	Q9CQ66	Q9CQ66	Tctex1 domain-containing protein 2	Tctex1d2
n. def.	n. def.	n. def.							+	1	1	1	5.2	5.2	5.2	15.242	0	0	1	1	1	n. def.	n. def.	0	Q9CQB5	Q9CQB5	CDGSH iron-sulfur domain-containing protein 2	Cisd2
6.56615	n. def.	n. def.								1	1	1	27.7	27.7	27.7	11.999	0	14730000	1	1	1	n. def.	n. def.	14730000	Q9CQR7	Q9CQR7	Gamma-secretase subunit PEN-2	Psenen
8.76975	7.10799	7.87764						+	+	1	1	1	7	7	7	14.825	0	2942500000	1	1	1	n. def.	n. def.	2942500000	Q9CQT9	Q9CQT9	Uncharacterized protein C20orf24 homolog
5.44434	n. def.	n. def.				OLIG2				1	1	1	1.7	1.7	1.7	143.23	0	20030000	1	1	1	103	1015	20030000	Q9CU62	Q9CU62	Structural maintenance of chromosomes protein 1A	Smc1a
4.01013	n. def.	n. def.				OLIG2				1	1	1	1.7	1.7	1.7	141.55	0	665320	0	1	1	n. def.	n. def.	665320	Q9CW03	Q9CW03	Structural maintenance of chromosomes protein 3	Smc3
3.78212	n. def.	n. def.								1	1	1	1.5	1.5	1.5	50.638	0.0035971	127160	1	1	1	n. def.	n. def.	127160	Q9CWX9	Q9CWX9	Probable ATP-dependent RNA helicase DDX47	Ddx47
4.67985	n. def.	n. def.								1	1	1	1.4	1.4	1.4	58.965	0.0034722	1291900	1	1	1	n. def.	n. def.	1291900	Q9CXH7	Q9CXH7	Shugoshin-like 1	Sgol1
5.49115	n. def.	n. def.								1	1	1	7.5	7.5	7.5	27.541	0	4337800	1	1	1	n. def.	n. def.	4337800	Q9CXS4	Q9CXS4	Centromere protein V	Cenpv
4.69475	n. def.	5.78684							+	1	1	1	3.9	3.9	3.9	44.714	0	891280	1	1	1	n. def.	n. def.	891280	Q9CY58	Q9CY58	Plasminogen activator inhibitor 1 RNA-binding protein	Serbp1
n. def.	n. def.	n. def.								1	1	1	1.2	1.2	1.2	99.104	0	0	1	1	1	n. def.	n. def.	0	Q9D4H9	Q9D4H9	PHD finger protein 14	Phf14
n. def.	n. def.	n. def.								1	1	1	3.9	3.9	3.9	35.641	0.0037175	0	1	1	1	n. def.	n. def.	0	Q9D4V3	Q9D4V3	Coiled-coil domain-containing protein 83	Ccdc83
5.49615	n. def.	n. def.								1	1	1	3.7	3.7	3.7	43.295	0	5015100	1	1	1	n. def.	n. def.	5015100	Q9D517	Q9D517	1-acyl-sn-glycerol-3-phosphate acyltransferase gamma	Agpat3
6.11697	n. def.	n. def.								1	1	1	7.4	7.4	7.4	41.349	0	20946000	1	1	1	n. def.	n. def.	20946000	Q9D5V6	Q9D5V6	Synapse-associated protein 1	Syap1
5.26877	n. def.	n. def.								1	1	1	2.2	2.2	2.2	67.66	0	6313000	1	1	1	196	437	6313000	Q9D5Y0	Q9D5Y0	Uncharacterized protein C7orf31 homolog
4.40446	n. def.	n. def.								1	1	1	3.1	3.1	3.1	59.064	0	761330	1	1	1	n. def.	n. def.	761330	Q9D787	Q9D787	Peptidyl-prolyl cis-trans isomerase-like 2	Ppil2
6.60082	n. def.	n. def.								1	1	1	8.8	8.8	8.8	22.448	0	43875000	0	1	1	n. def.	n. def.	43875000	Q9D7N2	Q9D7N2	Keratin-associated protein 26-1	Krtap26-1
n. def.	n. def.	5.876							+	1	1	1	2.6	2.6	2.6	47.153	0.0036364	0	1	1	1	n. def.	n. def.	0	Q9D8E6	Q9D8E6	60S ribosomal protein L4	Rpl4
6.1322	n. def.	n. def.								1	1	1	6.4	6.4	6.4	40.42	0	27116000	1	1	1	n. def.	n. def.	27116000	Q9D8N2	Q9D8N2	Protein FAM45A	Fam45a
n. def.	n. def.	n. def.								1	1	1	9.6	9.6	9.6	27.798	0	0	1	1	1	n. def.	n. def.	0	Q9D8Y8	Q9D8Y8	Inhibitor of growth protein 5	Ing5
n. def.	n. def.	n. def.								1	1	1	2.7	2.7	2.7	51.837	0.0035587	0	1	1	1	n. def.	n. def.	0	Q9DA19	Q9DA19	Corepressor interacting with RBPJ 1	Cir1
n. def.	n. def.	n. def.								1	1	1	1.8	1.8	1.8	75.363	0	0	1	1	1	110	550	0	Q9DBR3	Q9DBR3	Armadillo repeat-containing protein 8	Armc8
5.82136	5.6816	n. def.						+		1	1	1	4.8	4.8	4.8	32.562	0	7953300	1	1	1	n. def.	n. def.	7953300	Q9DC16	Q9DC16	Endoplasmic reticulum-Golgi intermediate compartment protein 1	Ergic1
n. def.	n. def.	n. def.								1	1	1	0.9	0.9	0.9	90.582	0	0	1	1	1	n. def.	n. def.	0	Q9DC23	Q9DC23	DnaJ homolog subfamily C member 10	Dnajc10
6.00268	n. def.	n. def.								1	1	1	4.3	4.3	4.3	44.252	0.0032895	16100000	0	1	1	n. def.	n. def.	16100000	Q9EPW2	Q9EPW2	Krueppel-like factor 15	Klf15
7.37365	n. def.	n. def.				OLIG2	+			8	8	5	32.8	32.8	25.4	32.406	0	283680000	17	8	5	n. def.	n. def.	283680000	Q9EQW6	Q9EQW6	Oligodendrocyte transcription factor 2	Olig2
n. def.	n. def.	n. def.								1	1	1	1.3	1.3	1.3	97.462	0	0	1	1	1	201	6	0	Q9ET01	Q9ET01	Glycogen phosphorylase, liver form	Pygl
4.80524	n. def.	n. def.								1	1	1	2.1	2.1	2.1	117.77	0.0032787	3193000	1	1	1	n. def.	n. def.	3193000	Q9JHR7	Q9JHR7	Insulin-degrading enzyme	Ide
n. def.	n. def.	n. def.								1	1	1	5.2	5.2	5.2	31.136	0.0034247	0	1	1	1	n. def.	n. def.	0	Q9JJZ6	Q9JJZ6	Krueppel-like factor 13	Klf13
n. def.	n. def.	n. def.								1	1	1	4	4	4	57.851	0.004329	0	1	1	1	n. def.	n. def.	0	Q9JKD8	Q9JKD8	T-box transcription factor TBX21	Tbx21
6.39536	n. def.	n. def.				OLIG2	+			3	1	1	9.6	5	5	27.141	0	34793000	3	3	1	n. def.	n. def.	34793000	Q9JKN5	Q9JKN5	Oligodendrocyte transcription factor 1	Olig1
2.9366	n. def.	n. def.								1	1	1	0.4	0.4	0.4	520.68	0.0033113	220370	0	1	1	n. def.	n. def.	220370	Q9JLC8	Q9JLC8	Sacsin	Sacs
4.83777	n. def.	n. def.								1	1	1	1.6	1.6	1.6	118.72	0.0033333	4060900	0	1	1	n. def.	n. def.	4060900	Q9JLG8	Q9JLG8	Calpain-15	Solh
6.27841	n. def.	n. def.								1	1	1	3.2	3.2	3.2	31.61	0	28478000	1	1	1	n. def.	n. def.	28478000	Q9QWZ1	Q9QWZ1	Cell cycle checkpoint protein RAD1	Rad1
n. def.	n. def.	n. def.								1	1	1	0.4	0.4	0.4	214.89	0	0	1	1	1	n. def.	n. def.	0	Q9QXN0	Q9QXN0	Protein Shroom3	Shroom3
6.35442	n. def.	n. def.				NPAS3	+			1	1	1	2.1	2.1	2.1	100.46	0	85942000	0	1	1	n. def.	n. def.	85942000	Q9QZQ0	Q9QZQ0	Neuronal PAS domain-containing protein 3	Npas3
5.88599	5.51292	n. def.						+		4	4	4	14.8	14.8	14.8	39.735	0	13844000	4	4	4	n. def.	n. def.	13844000	Q9QZQ8;Q8CCK0	Q9QZQ8;Q8CCK0	Core histone macro-H2A.1;Core histone macro-H2A.2	H2afy;H2afy2
5.07795	n. def.	n. def.								1	1	1	2.1	2.1	2.1	98.884	0.0033784	5025800	0	1	1	n. def.	n. def.	5025800	Q9R1E6	Q9R1E6	Ectonucleotide pyrophosphatase/phosphodiesterase family member 2	Enpp2
4.96631	n. def.	n. def.								1	1	1	1.9	1.9	1.9	73.172	0	4071600	0	1	1	n. def.	n. def.	4071600	Q9R1N9	Q9R1N9	Collagen alpha-1(XIII) chain	Col13a1
n. def.	n. def.	n. def.								1	1	1	1.4	1.4	1.4	65.696	0	0	1	1	1	n. def.	n. def.	0	Q9WUA2	Q9WUA2	Phenylalanine--tRNA ligase beta subunit	Farsb
n. def.	n. def.	n. def.								1	1	1	4.2	4.2	4.2	21.017	0.00369	0	1	1	1	n. def.	n. def.	0	Q9WUP0	Q9WUP0	Receptor activity-modifying protein 2	Ramp2
6.15296	n. def.	n. def.							+	1	1	1	1.6	1.6	1.6	97.433	0	58310000	1	1	1	113	373	58310000	Q9WUX5	Q9WUX5	Protein MRVI1	Mrvi1
4.54964	n. def.	n. def.								1	1	1	2.1	2.1	2.1	96.466	0.0033003	1134500	0	1	1	n. def.	n. def.	1134500	Q9Z1G4	Q9Z1G4	V-type proton ATPase 116 kDa subunit a isoform 1	Atp6v0a1
n. def.	n. def.	n. def.								1	1	1	0.9	0.9	0.9	181.81	0.0035088	0	1	1	1	n. def.	n. def.	0	Q9Z1N9	Q9Z1N9	Protein unc-13 homolog B	Unc13b
5.9832	n. def.	n. def.								1	1	1	2.2	2.2	2.2	69.558	0.0040323	35596000	1	1	1	206	66	35596000	Q9Z2C5	Q9Z2C5	Myotubularin	Mtm1
n. def.	n. def.	n. def.								1	1	1	3.1	3.1	3.1	48.157	0.0036765	0	1	1	1	n. def.	n. def.	0	Q9Z2W1	Q9Z2W1	Serine/threonine-protein kinase 25	Stk25
