# Supplementary material for: An efficient and scalable pipeline for epitope tagging in mammalian stem cells using Cas9 ribonucleoprotein
Source: eLife. 2018 Apr 11;7:e35069. doi: 10.7554/eLife.35069 (PMC5947990; doi:10.7554/eLife.35069)
Supplement: Figure 8—source data 1. [file elife-35069-fig8-data1.xlsx]

## Sheet: Figure 8B (last panel)
	Length of homology arms	mCherry knock-in (%)
	No DNA	0.086
	100 bp	0.29
	250 bp	0.62
	500 bp	0.97
	1 kb	1.61
