# Supplementary material for: An efficient and scalable pipeline for epitope tagging in mammalian stem cells using Cas9 ribonucleoprotein
Source: eLife. 2018 Apr 11;7:e35069. doi: 10.7554/eLife.35069 (PMC5947990; doi:10.7554/eLife.35069)
Supplement: Supplementary file 1. [file elife-35069-supp1.xlsx]

## Sheet: crRNAs and ssODN
Figure	crRNA	DNA sequence 5' - 3'	RNA sequence 5' - 3'
Figure 1	mouse Olig2_crRNA	TCTCCAGGACGCACCCCCGC	UCUCCAGGACGCACCCCCGC
Figure 1	mouse Sox2_crRNA	GTGAGGGCTGGACTGCGAAC	GUGAGGGCUGGACUGCGAAC
Figure 1	mouse Sox3_crRNA	GCTGACCCACATCTGAGCTC	GCUGACCCACAUCUGAGCUC
Figure 1	mouse Sox8_crRNA	AAAGATCTGGCTAGACTTCC	AAAGAUCUGGCUAGACUUCC
Figure 1	mouse Sox9_crRNA	GCTTTTCTCTTCTCAGGGTC	GCUUUUCUCUUCUCAGGGUC
Figure	ssODN	Length of homology arms	ssODN sequence (5'-3')
Figure 1	mouse Olig2-V5_ssODN	70 bp	GCCCCAGCGCTGGCCTGTCCGCGCTGCTCCGCAGCCCTTGGCTCTCCAGGACGCACCCCCGCTAGCCGGCTCACGTAGAATCGAGACCGAGGAGAGGGTTAGGGATAGGCTTACCCTTGGCGTCGGAGGTGAGGCGCGGCAAGGTGCCGGCGCCCATAGCCGACACGTGGTGGTGCGGCGGCGGC
Figure 1D, 1F	mouse Sox2-V5_ssODN	70 bp	GGCCCAGCACTACCAGAGCGGCCCGGTGCCCGGCACGGCAATTAACGGCACACTGCCCCTGTCGCACATGGGTAAGCCTATCCCTAACCCTCTCCTCGGTCTCGATTCTACGTGAGGGCTGGACTGCGAACTTGAGAAGGGGAGAGATTTTCAAAGAGATACAAGGGAATTGGGAGGGGTGCAAA
Figure 1F	mouse Sox3-V5_ssODN	75 bp	CGGCTGCACGGCGTGCACCAGCACTACCAGGGCGCCGGGACTGCGGTCAATGGAACGCTGCCGCTGACCCACATCGGTAAGCCTATCCCTAACCCTCTCCTCGGTCTCGATTCTACGTGAGCTCCGCCCCGCGCTCCCAGCTCTTCGCCCCCACCCCGCCCCACACCCCCCACGTTGGGACGCCTTGCTGTTTAG
Figure 1F	mouse Sox8-V5_ssODN	75 bp	GGCTGCCTCCAACCTCTACCGAGTACACTCCGCAAGAACTCAAAGATCTGGCTAGACTTCCTGCATGCAGCAGCCTCACGTAGAATCGAGACCGAGGAGAGGGTTAGGGATAGGCTTACCGGGTCGGGTCAGGGTGGTGTACACAGGCTGGTCCCAGTTGCTGCTGGGGCTGTGTGCGGGTGGCATAGAGAGCCC
Figure 1F	mouse Sox9-V5_ssODN	75 bp	CTTTTCGTTTCTTTCTTTTCTTCTTTAAAAAAAAAAAAAAAAAAGATCAGCTCTGTCACCATAGCTTTTCTCTTCTCACGTAGAATCGAGACCGAGGAGAGGGTTAGGGATAGGCTTACCGGGTCTGCTGAGCTGTGTGTAGACTGGTTGTTCCCAGTGCTGCGGGCTGTGGGTCTGCGGGATGGAAGGGACCCC
Figure 1E	mouse Sox2-V5_ssODN_tag	79 bp	ACTGCACATGGCCCAGCACTACCAGAGCGGCCCGGTGCCCGGCACGGCCATTAACGGCACACTGCCCCTGTCGCACATGGGTAAGCCTATCCCTAACCCTCTCCTCGGTCTCGATTCTACGTGAGGGCTGGACTGCGAACTGCAGAAGGGGAGAGATTTTCAAAGAGATACAAGGGAATTGGGAGGGGTGCAAAAAGAGG
Figure 1E	mouse Sox2-HA_ssODN_tag	86 bp	CCAGTAGACTGCACATGGCCCAGCACTACCAGAGCGGCCCGGTGCCCGGCACGGCCATTAACGGCACACTGCCCCTGTCGCACATGTACCCATACGATGTTCCAGATTACGCTTGAGGGCTGGACTGCGAACTGCAGAAGGGGAGAGATTTTCAAAGAGATACAAGGGAATTGGGAGGGGTGCAAAAAGAGGAGAGTAG
Figure 1E	mouse Sox2-3XFLAG_ssODN_tag	67 bp	CCAGCACTACCAGAGCGGCCCGGTGCCCGGCACGGCCATTAACGGCACACTGCCCCTGTCGCACATGGACTACAAAGACCATGACGGTGATTATAAAGATCATGACATCGATTACAAGGATGACGATGACAAGTGAGGGCTGGACTGCGAACTGCAGAAGGGGAGAGATTTTCAAAGAGATACAAGGGAATTGGGAGGGG
Figure 1E	mouse Sox2-Myc_ssODN_tag	85 bp	CAGTAGACTGCACATGGCCCAGCACTACCAGAGCGGCCCGGTGCCCGGCACGGCCATTAACGGCACACTGCCCCTGTCGCACATGGAGCAGAAGCTGATCTCAGAGGAGGACCTGTGAGGGCTGGACTGCGAACTGCAGAAGGGGAGAGATTTTCAAAGAGATACAAGGGAATTGGGAGGGGTGCAAAAAGAGGAGAGTA
Figure?	mouse Sox2-HA_ssODN multiplex	84 bp	AGTAGACTGCACATGGCCCAGCACTACCAGAGCGGCCCGGTGCCCGGCACGGCCATTAACGGCACACTGCCCCTGTCGCACATGTACCCATACGATGTTCCAGATTACGCTTGAGGGCTGGACTGCGAACTTGAGAAGGGGAGAGATTTTCAAAGAGATACAAGGGAATTGGGAGGGGTGCAAAAAGAGGAGAGTAGG
Figure	crRNA	DNA sequence 5' - 3'	RNA sequence 5' - 3'
Figure 3 D	human Sox2_crRNA	CCTCTCACACATGTGAGGGC	CCUCUCACACAUGUGAGGGC
Figure 3 D	human Sox9_crRNA	CCATCTTCGCCCTTCGTGGG	CCAUCUUCGCCCUUCGUGGG
Figure 3 D	human Olig2_crRNA	CCGACGCCAAGTGAGCCGAC	CCGACGCCAAGUGAGCCGAC
Figure	ssODN	Length of homology arms	ssODN sequence (5'-3')
Figure 3 D	human Sox2-V5_ssODN	77 bp	TTCACATGTCCCAGCACTACCAGAGCGGCCCGGTGCCCGGCACGGCCATTAACGGCACACTGCCCCTCTCACACATGGGTAAGCCTATCCCTAACCCTCTCCTCGGTCTCGATTCTACGTGAGGGCCGGACAGCGAACTGGAGGGGGCAGAAATTTTCAAAGAAAAACGAGGGAAATGGGAGGGGTGCAAAAGAGGAGA
Figure 3 D	human Sox9-V5_ssODN	77 bp	CTGGGGTCCCTTCCATCCCGCAGACCCACAGCCCCCAGCACTGGGAACAACCCGTCTACACACAGCTCACTCGACCTGGTAAGCCTATCCCTAACCCTCTCCTCGGTCTCGATTCTACGTGAGGAGGGCTCCCACGAAGGCCGAAGATGGCCGAGATGATCCTAAAAATAACCGAAGAAAGAGAGGACCAACCAGAATT
Figure 3 D	human Olig2-V5_ssODN	77 bp	GCCAGGTGCCGCCGCCGCACCACCACGTGTCGGCTATGGGCGCCGGCAGCCTGCCGCGCCTCACCTCCGACGCCAAGGGTAAGCCTATCCCTAACCCTCTCCTCGGTCTCGATTCTACGTGAGCCGACTGGCGCCGCCGCGTTCTGGCGACAGGGGAGCCAGGGGCCGCGGGGAAGCGAGGACTGGCCTGCGCTGGGCT
crRNA sequences for the proximal-cutting gRNAs (Sox and Fox family of genes)
Figure	Gene-crRNA name	crRNA sequence 5' - 3'	Cut site relative to STOP
Figure 4	Foxa1_g1	GCAGACAAAACCCTCAGTTC	+9 (40 bp downstream of STOP)
Figure 4	Foxa2_g1	ATCCTAAGAAGATGGCTTTC	+13
Figure 4	Foxb2_g1	TTCTTAGGGGACCCCGCGAC	+10
Figure 4	Foxc1_g1	GCTCTAAGAGTGCCGGGAAT	+7
Figure 4	Foxc2_g1	GTCCTGGGGCTGGAGCGGAC	+12
Figure 4	Foxd2_g1	TAACTGGCCCGAGCCCGGTG	+6
Figure 4	Foxd3_g1	TGATGAGCTAGTGGCCGGGC	+17
Figure 4	Foxd4_g1	CCGAATTTTAAGCAGCACCC	+6
Figure 4	Foxe1_g1	GTGAGGTTTCGTGCCTACCC	+7
Figure 4	Foxe3_g1	TGTGAGTCGCTTTCCGCTGC	+12
Figure 4	Foxf1_g1	GCCGTGTGTGATGTGAGGTG	+1
Figure 4	Foxf2_g1	TAAGCCCTGTGTTATGTGAA	+1
Figure 4	Foxg1_g1	TCACTTACAGTCTGGTCCCC	+9
Figure 4	Foxh1_g1	GGTACAGCATGTAATATTCT	+3
Figure 4	Foxi2_g1	CAATGTTGGAACAGAGCACC	+24
Figure 4	Foxj1_g1	CTTGAGCACTGTCCGGAGAT	+21
Figure 4	Foxj2_g1	AGAATTCACCACCAGGCCTT	+26
Figure 4	Foxj3_g1	TGATTGGGATTCAATAGTGT	-2 (two bp upstream of STOP)
Figure 4	Foxk1_g1	GCGAGTGAAGTGTCGCCTGC	+9
Figure 4	Foxk2_g1	AGGTCTCCCACAGCTAGTTC	-4
Figure 4	FoxL2_g1	TCTCTGAGTGCCAACGCGCG	+10
Figure 4	Foxm1_g1	TCATCCCTTAGCTGCGATAG	+6
Figure 4	Foxn2_g1	CTGCGCATGTCTACTTTTCC	-7
Figure 4	Foxn3_g1	GTTTTGAACTTATGGCCATT	+33
Figure 4	Foxn4_g1	TCTGCTTTGAGCTGTCGGCC	+7
Figure 4	Foxo1_g1	CAGGCTAAGAGTTAGTGAGC	+9
Figure 4	Foxo3_g1	ACCAGGCTGAAGGATCACTG	+7
Figure 4	Foxo4_g1	TGAATCAGGGGTGCTATACC	+3
Figure 4	Foxo6_g1	CGGGGCACCCAGGCTGTGTA	+12
Figure 4	Foxp1_g1	TCGGGGGTCGGCCCGCCCAG	+7
Figure 4	Foxp3_g1	AACCAAGAAAAGGTGGGCGG	+23
Figure 4	Foxp4_g1	GAGGAGAGGACATGTCCTAA	-3
Figure 4	Foxq1_g1	GGAGACTCTGCTAGCTTGAC	-2
Figure 4	Sox1_g1	GACGCACATCTAGCGCCGCG	+4
Figure 4	Sox3_g1	GCTGACCCACATCTGAGCTC	+1
Figure 4	Sox4_g1	TCACCTACTGAAGGGAGCGC	+6
Figure 4	Sox5_g1	CGGGACAAGCCAACTGATAA	0
Figure 4	Sox6_g1	GAGCCTGTCAGTGCCAACTG	-4
Figure 4	Sox7_g1	GCTACAGTGTGTCATAGAGC	0
Figure 4	Sox8_g1	AAAGATCTGGCTAGACTTCC	+17
Figure 4	Sox9_g1	GCTTTTCTCTTCTCAGGGTC	-5
Figure 4	Sox10_g1	CGACTCTATCCCGACCTTAG	-3
Figure 4	Sox11_g1	CCTGGTGTTCACGTATTGAG	-2
Figure 4	Sox12_g1	GTGCGCGCCCCGCTGACGGT	+7
Figure 4	Sox13_g1	CAGACTGATCCCCAGCTCGC	+9
Figure 4	Sox14_g1	CGGCCATGTAACCCCAAGCT	+6
Figure 4	Sox15_g1	GTAACCCACCTTTAACTGGC	+2
Figure 4	Sox17_g1	GCAACTACCCCGACATTTGA	-3
Figure 4	Sox18_g1	CCACATGCAGAAGCGGTGGA	+18
Figure 4	Sox21_g1	TGCCGCGCTATGACCCCGCG	+4
crRNA sequences for the distal-cutting gRNAs (Sox and Fox family of genes)
Figure	Gene-crRNA name	crRNA sequence 5' - 3'	Cut site relative to STOP
Figure 4	Foxa1_g2	GGTTTTTCTCTCCTGCTACC	+40 (40 bp downstream of STOP)
Figure 4	Foxa2_g2	GCCCTGCTAGCTCTGGTCAC	+32
Figure 4	Foxb2_g2	GGACCCCGCGACCGGTGAGA	+18
Figure 4	Foxc1_g2	CATTTGGCTCTAAGAGTGCC	+13
Figure 4	Foxc2_g2	GGCGAAGCCGGTGCGGTCCT	+27
Figure 4	Foxd2_g2	TTAAGGAGTGAGGGCCTAAC	+22
Figure 4	Foxd3_g2	CTAGTGGCCGGGCCGGACGG	+24
Figure 4	Foxd4_g2	GCCTCCAGGCTGGGTCGCCT	+33
Figure 4	Foxe1_g2	AGTCCTGTCCGCCGGTCTCG	+61
Figure 4	Foxe3_g2	CTTTCCGCTGCGGGAGCGCC	+21
Figure 4	Foxf1_g2	TGATGTGAGGTGAGGCCACG	+9
Figure 4	Foxf2_g2	TGTGTTATGTGAATGGACAG	+5
Figure 4	Foxg1_g2	TAAAACGTTCACTTACAGTC	+17
Figure 4	Foxh1_g2	TGTAATATTCTAGGGCAGAA	+12
Figure 4	Foxi2_g2	TCAGGACCTTAGCTCAATGT	+38
Figure 4	Foxj1_g2	GCCCTGACTTGAGCACTGTC	+28
Figure 4	Foxj2_g2	CGTGGCCAGAATTCACCACC	+33
Figure 4	Foxj3_g2	TCTGCAAGACAGCAGACTCC	+24
Figure 4	Foxk1_g2	TGGAGTGAAACTCACGCCAC	+36
Figure 4	Foxk2_g2	AAAGTTGATGTCTGAAGAAA	+16
Figure 4	FoxL2_g2	CACCCCTATCCCGGGAGTGG	+44
Figure 4	Foxm1_g2	CCTTAGCTGCGATAGAGGCA	+11
Figure 4	Foxn2_g2	GTCCGTCCGTCCGTCCGCTA	+83
Figure 4	Foxn3_g2	CCATTTGGTTTCAGCATGTC	+48
Figure 4	Foxn4_g2	CTCGAGCCAATTGCTGACGG	+58
Figure 4	Foxo1_g2	TTATTCACTGCAGTATCAAG	+37
Figure 4	Foxo3_g2	TTAGTGCGCCACAATGCAAT	+53
Figure 4	Foxo4_g2	AAGATGCTGGGGTGAATCAG	+15
Figure 4	Foxo6_g2	GCCCCATGGGGACGGGACCG	+30
Figure 4	Foxp1_g2	TCCCCAATCTTCGGTCTCGG	+23
Figure 4	Foxp3_g2	GGGCCAAAACCATGAGACTG	+49
Figure 4	Foxp4_g2	ACATGTCCTAAGGGCAGGGT	+6
Figure 4	Foxq1_g2	CAGCAGAAGGGGTGCTGAGC	+32
Figure 4	Sox1_g2	ATCTAGCGCCGCGGGGACGC	+11
Figure 4	Sox3_g2	CGGGACTGCGGTCAATGGAA	-23 (23 bp upstream of STOP)
Figure 4	Sox4_g2	CTACTGAAGGGAGCGCGGGC	+10
Figure 4	Sox5_g2	CAACAGACTGTGGTGAGCCG	+24
Figure 4	Sox6_g2	GCAAACAAAAGCTCCTCAGT	-2
Figure 4	Sox7_g2	AGAGCTGGAGGAATGGAGCC	+15
Figure 4	Sox8_g2	AACCTCTACCGAGTACACTC	+48
Figure 4	Sox9_g2	ACCATAGCTTTTCTCTTCTC	+1
Figure 4	Sox10_g2	ACTCTATCCCGACCTTAGAG	-2
Figure 4	Sox11_g2	GTTCACGTATTGAGAGGCGC	+4
Figure 4	Sox12_g2	GGGCGTGCGCGCCCCGCTGA	+11
Figure 4	Sox13_g2	GGGCCCGGCCCGTCACCGCT	+30
Figure 4	Sox14_g2	CCCGGACCTGATGGGTAGCG	+29
Figure 4	Sox15_g2	TTAACTGGCAGGGACGCCCA	+13
Figure 4	Sox17_g2	CGGTTGCCGACCCGACCTGA	+17
Figure 4	Sox18_g2	TTGGCCACATGCAGAAGCGG	+22
Figure 4	Sox21_g2	ATGTATAGGTTCGAGACTCG	+49
ssODN sequences (Sox and Fox family of genes)
Figure	Gene-ssODN name	Length of homology arms	ssODN sequence 5' - 3'
Figure 4	mouse_Foxa1-V5_ssODN	75 bp	TTTTGTTTGTTTGCTGTTGGTTTTTCTCTCCTGCTACCAGCTTGGCCATGCAGACAAAACCCTCAGTTCTGCGAGCTACGTAGAATCGAGACCGAGGAGAGGGTTAGGGATAGGCTTACCGGAAGTATTTAGCACGGGTCTGGAATACACACCTTGGTAGTAGGCTGGCTCCAGGGCTGAGGGCTCGATGGGGCT
Figure 4	mouse_Foxa2-V5_ssODN	75 bp	CTGGATGCCTCGCCCCTGGCTGCAGACACTTCCTACTACCAAGGAGTGTACTCCAGGCCTATTATGAACTCATCCGGTAAGCCTATCCCTAACCCTCTCCTCGGTCTCGATTCTACGTAAGAAGATGGCTTTCAGCCCCTGCTAGCTCTGGTCACTGCGGACAAGGGAAATGAGAGGCTGAGTGGAGACTTTGGG
Figure 4	mouse_Foxb2-V5_ssODN	75 bp	CCTCTCTTGGAGCCCACCGCAGCCGGCAGGGCTGACAGCAAGGGGAGCTCCCTACACTCGGTGTTGGTGCATTCTGGTAAGCCTATCCCTAACCCTCTCCTCGGTCTCGATTCTACGTAGGGGACCCCGCGACCGCTGAGAAGCCGCCTGTCGAGAGACTGAGACAATGGTCCCAGACCGAGAGGGTGCTCCAGG
Figure 4	mouse_Foxc1-V5_ssODN	75 bp	TGCATTGCTGGATTCTTTTACTGTTCCTGCTCTGGGGTTCCATTCCATTTGGCTCTAAGAGTGCCGGCAATAGCGTCACGTAGAATCGAGACCGAGGAGAGGGTTAGGGATAGGCTTACCGAATTTGCTACAGTCATAGACGAAAGCCCCCGACGTGCGGTACAGAGACTGACTGGCAGGGAAAGCCATCTGACA
Figure 4	mouse_Foxc2-V5_ssODN	75 bp	CGGCTCCGTCGAAGAAGGTTCCCATGGAGGAGGCGAAGCCGGTGCGGTCCTGGCGCTGGAGCGGACTGCACAGCCTCACGTAGAATCGAGACCGAGGAGAGGGTTAGGGATAGGCTTACCGTATTTGGTGCAGTCGTAAGAGTAGGGGGCTGCGTGGCGGTAGAGGGACGGCGTAGCTCGATAGGGCAGCTGACA
Figure 4	mouse_Foxd2-V5_ssODN	75 bp	GAATTCCGCTGGGACCGGCCGAGCTCCCCAGAGAGGTTAAGGAGTGAGGGCCTAACTGCCCCGAGCCCGGTGCGCTCACGTAGAATCGAGACCGAGGAGAGGGTTAGGGATAGGCTTACCAAAGTGGCAGCCACTGAGGCCCGCGACTTTGCTGGCAAACGAGGGCCCTGAAGACAGGAGTGAGTCCCCTGGGTG
Figure 4	mouse_Foxd3-V5_ssODN	75 bp	GGACAGTTCCTGCAGCCCGCAGCCTCAGCCGCAGCGGCTGCGGCCGCCGCCGTGCAAGCCAAGTGGCCCGCTCAAGGTAAGCCTATCCCTAACCCTCTCCTCGGTCTCGATTCTACGTAGTGATGAGCTAGTGGCCGGGCCGCACGGCGCCCTCTGGCAGCAGCCTGCTCTTCCAGGCGGTACGCCCTCTCTGAT
Figure 4	mouse_Foxd4-V5_ssODN	75 bp	CAGCCTGCAGCTGACGACGGTAGGCTGACAACCCTGGCCGCTCTTTCGGGCCGAGAGGGGACCTTGCCCGAATTTGGTAAGCCTATCCCTAACCCTCTCCTCGGTCTCGATTCTACGTAAGCAGCACCCAGCCCCAGCCTCCAGGCTGGGTCGCCTTGCCACACCTGGAGCCAAGTGGCAAAATGGAACCACTTT
Figure 4	mouse_Foxe1-V5_ssODN	75 bp	CCTGTCCGCCGGTCTCGGGCGATTTACATCTTTCAGAACGTCCTGGAGTTAGTGAGGTTTCGTGCCTACCCGGCCTCACGTAGAATCGAGACCGAGGAGAGGGTTAGGGATAGGCTTACCCATGGCAGACACGAACCGATCCACCGCGCCGGGGTAGGCGGTGGCGTGGCGGGAGTGGTAGGCACCGCCACCACC
Figure 4	mouse_Foxe3-V5_ssODN	75 bp	GCGCTCGGGCCGCTCGGAGCCGGGGAAGCCTACCTGAGACAGCCGGGCTTCGCGCCGGGGCTGGAGCGCTACCTGGGTAAGCCTATCCCTAACCCTCTCCTCGGTCTCGATTCTACGTGAGTCGCTTTCCGCTGCGGCAGCGCCTGCTGGAGCCTTCTGCCCCGGCCTGCGCTGGAGCAGTGCGAGCTTGTCCGT
Figure 4	mouse_Foxf1-V5_ssODN	75 bp	TCTATGCATACAACAGGCGGAGGATCTTACTATCACCAGCAGGTCACCTACCAAGACATCAAGCCGTGTGTGATGGGTAAGCCTATCCCTAACCCTCTCCTCGGTCTCGATTCTACGTGAGGTGAGCCCACGGGCCCCTCCAGCCCAGCCTGGCCGGCCCAGGGACCAGGAGCCCACCGCCACAAACTGCTTTAC
Figure 4	mouse_Foxf2-V5_ssODN	75 bp	CACCCTTCCGCTAGTGGCTCTTATTATCACCATCATCACCAGAGCGTGTGCCAAGATATTAAGCCCTGTGTTATGGGTAAGCCTATCCCTAACCCTCTCCTCGGTCTCGATTCTACGTGAATGCACAGAGCCCTTGAAGGCCACTCTGCTCTCCCTCTTCTGCCTTCTTCTCCTCTCCCCTCCGAGAGGGGCAGC
Figure 4	mouse_Foxg1-V5_ssODN	75 bp	GGACTTATTTTTTTAATTATCATTTACAATGCAAATGTGTGTAAAACGTTCACTTACAGTCTGCTCCCCCGCATGTTACGTAGAATCGAGACCGAGGAGAGGGTTAGGGATAGGCTTACCATGTATTAAAGGGTTGGAAGAAGACCCCTGATTTTGATGTGTGAAATAATCAGACAGTCCCCCGGACAGTCCTGT
Figure 4	mouse_Foxh1-V5_ssODN	75 bp	TATGATGTGTGGGTCAGCCATCCTAGGGACCTGGCAGCTCCTGCCCCAGGCTGGCTCCTTTCCTGGTACAGCATGGGTAAGCCTATCCCTAACCCTCTCCTCGGTCTCGATTCTACGTAATATTCTAGCGCAGAAAGCGCTGCTTCTCTCTTCCACCCATGAATATCATTTTGATGAACCAGAGCTAGGAGCATG
Figure 4	mouse_Foxi2-V5_ssODN	75 bp	GGCTCCCAGGAAGGACTGATTCAGGACCTTAGCTCAATGTTGCAACAGAGCACCTGCCCAGTCTCTAGCTTTCCTTCACGTAGAATCGAGACCGAGGAGAGGGTTAGGGATAGGCTTACCAACTTCAGTCCCATCCCGGCTGTAGATGAGGTGCCCCATCCTAAAGCCTGTAGCCCCTGTCTGATGGCCCGGAGC
Figure 4	mouse_Foxj1-V5_ssODN	75 bp	CCACGGGCCTGTCTTGGGAGGCAGTTCTGGGCCCTGACTTGAGCACTGTCCGCAGATGGCGTGGGGCCTGACCTTTTACGTAGAATCGAGACCGAGGAGAGGGTTAGGGATAGGCTTACCCAAGAAGGCACCCACACTGGCCCAGTCCTGCAGGTCAGCGGCCAGGGTGGCATCCCCTGCTTCAAAGATGGGTTC
Figure 4	mouse_Foxj2-V5_ssODN	75 bp	GGATAGCCGGGGACTGCTCTTCCCCCGTGGCCAGAATTCACCACCAGCCCTTGGCCTGATGTCAACTGTGATTCATTACGTAGAATCGAGACCGAGGAGAGGGTTAGGGATAGGCTTACCAGTGATCAAGTCCCAGTCGAAGTCATCGGTGATCTCCTCATTGGCACCAGGAGGTGGGACAGGTGGCCGGGGAAC
Figure 4	mouse_Foxj3-V5_ssODN	75 bp	TCCCAAGCCTTCCCGATGCGGCGCCCTCTGCCTCCAGATGACATCCAGGATGACTTTGATTGGGATTCAATAGTGGGTAAGCCTATCCCTAACCCTCTCCTCGGTCTCGATTCTACGTAGCCTTGTTTCTGCAAGACAGCAGACTCCAGCATTCTTTTTGTTCAGTGAAAGGACGGATTAGAGGCCGGTTGAGAA
Figure 4	mouse_Foxk1-V5_ssODN	75 bp	GAACCCGGTGGGACAGCCACCACACAGCCCACAGCTATGGCAGCCACCGGCCCTCAGGGCCCGGGGACCGGCGAGGGTAAGCCTATCCCTAACCCTCTCCTCGGTCTCGATTCTACGTGAAGTGTCGCCTGCAGCAAGGTGGAGTGAAACTCACGCCACAGCAGCCCTAGTGGCCAGCAGCTACATTCAAGGACC
Figure 4	mouse_Foxk2-V5_ssODN	75 bp	CTCCCTGCTTCAATGAGAGGCAGCATCTCCTTTTGGCACCACAAAGTTGATGTCTGAAGAAAAGCTCTCCCACAGCTACGTAGAATCGAGACCGAGGAGAGGGTTAGGGATAGGCTTACCGTTCTGCATTGCCTTTTCTCTCACAGCTGCTGGTGGTGCATCCACACTCAGGGCAATGACAATGCTCTCGCCATC
Figure 4	mouse_FoxL2-V5_ssODN	75 bp	GAGCTCGCCATGATGCATTGCTCATACTGGGACCACGACAGCAAGACGGGCGCGCTGCACTCGCGTCTGGATCTCGGTAAGCCTATCCCTAACCCTCTCCTCGGTCTCGATTCTACGTGAGTGCCAACGCGCGCGCGAGCGGTCCCCCACCCCTATCCCGGGAGTGGAGCAGCCGAGCTCGGGTCGCAGCCGCAG
Figure 4	mouse_Foxm1-V5_ssODN	75 bp	CTAGACATCAGTTTCCCTGGCCTGGAGGAGGACCCTCTGGGCCCTGACAACATCAACTGGTCTCAGTTCATCCCTGGTAAGCCTATCCCTAACCCTCTCCTCGGTCTCGATTCTACGTAGCTGCGATAGAGCCAAGCCCTTGCCCCTGCCACTCAAGCCGCCTGCTATCCTGGCACTTGTGTGGCTCAGGGTACC
Figure 4	mouse_Foxn2-V5_ssODN	75 bp	TGCCTCTGACATCCCTGTAAAAGTTGAGTAGAAGAGTAACTTTAGAGTAACTTTAGAGTAACTTCACACTCTGCGCATGTCTACGTAGAATCGAGACCGAGGAGAGGGTTAGGGATAGGCTTACCCTTTTCCCGCTGCTTCTGACTCTGTGCCTTCGCAGTACTTATCAGGGAACCAAGGCAGGTGCGGATTCCA
Figure 4	mouse_Foxn3-V5_ssODN	75 bp	ATTCGGTCCTGTTTGAACAACATCACCAATCGGACGGCCAAGGGGCAGAAAGAACAAAAGGAAACCGCAAAAAATGGTAAGCCTATCCCTAACCCTCTCCTCGGTCTCGATTCTACGTGAAACAAGTCTCTGATTTGTTTTGAACTTATGGCCATTTGCTTTCAGCATGTCAGCAGATTTCTAATGATTTGTGGC
Figure 4	mouse_Foxn4-V5_ssODN	75 bp	GACGGTGTGGCCCCATCAGCGGCCAACTCTGCGCAGTACCTGGGTACACCAGGGAACAAGCCTATTGCTCTGCTTGGTAAGCCTATCCCTAACCCTCTCCTCGGTCTCGATTCTACGTGAGCTGTCGGCCTGCAAGAAAGGGCACCTTGGCTGTACCGTGTCTCGAGCCAATTGCTGACGGGGCAAATGACAGCT
Figure 4	mouse_Foxo1-V5_ssODN	75 bp	AACTTTGATAATGTGTTGCCCAACCAAAGCTTCCCACACAGTGTCAAGACTACAACACACAGCTGGGTGTCAGGCGGTAAGCCTATCCCTAACCCTCTCCTCGGTCTCGATTCTACGTAAGAGTTAGTGAGCAGCTAAGTTTATTCACTGCAGTATCAAGAGCCCTTTTGAAAAAGGGACACAGTACCATGTGTC
Figure 4	mouse_Foxo3-V5_ssODN	75 bp	CAGAACGTTGTTGGTTTGAATGTGGGGAACTTCACTGGTGCTAAGCAGGCCTCATCTCAAAGCTGGGTACCAGGCGGTAAGCCTATCCCTAACCCTCTCCTCGGTCTCGATTCTACGTGAAGGATCACTGAGCAAAGGGGAAATGGGCAAAGCAGGTTAGTGCGCCACAATGCAATGGCAAAGCATCGCCGGTGG
Figure 4	mouse_Foxo4-V5_ssODN	75 bp	CCCTCTGGCTCAGAGCATAGAATTAGTTGAATATTCAAGAGCAAAGATGCTGGGGTGAATCAGGGCTGCTATACCTCACGTAGAATCGAGACCGAGGAGAGGGTTAGGGATAGGCTTACCTGGCTCAAAGTTGAAGTCCAGTCCCTCACCATCCATGAGGTCACTGATGATGTTATCCATGTCGCACTCCAGGTT
Figure 4	mouse_Foxo6-V5_ssODN	75 bp	TTCGACTCAGCCCTGCCTCCGCCACCCCCGGGCCTGGCTGGGGCGCCGCCCCCTAACCAGAGCTGGGTGCCGGGCGGTAAGCCTATCCCTAACCCTCTCCTCGGTCTCGATTCTACGTGAGGGCCACCCTACACAGCCTGCGTGCCCCGGTCCCGTCCCCATGGGCCCTCTGTCTTCCCATCCCGATCCCCGGGT
Figure 4	mouse_Foxp1-V5_ssODN	75 bp	TTTTATTTTTTTTTTAAATTTGTTTTGCTTTTTTTTCCCCAATCTTCGGTCTCGGGGCTCGGCCCGCCCAGAGCTTCACGTAGAATCGAGACCGAGGAGAGGGTTAGGGATAGGCTTACCCTCCATGTCCTCATTTACTGGTTCGTCTTCGTAATCTCTGTCATGGTCAAAATCTGGACTGTGGTTGGCTGTTGT
Figure 4	mouse_Foxp3-V5_ssODN	75 bp	GTGTGGACCGTAGATGAATTTGAGTTTCGCAAGAAGAGGAGCCAACGCCCCAACAAGTGCTCCAATCCCTGCCCTGGTAAGCCTATCCCTAACCCTCTCCTCGGTCTCGATTCTACGTGACCTCAAAACCAAGAAAAGGTGGGCGGGGCAGGGGGCCAAAACCATGAGACTGAGCCTGTGGGGGCAAGGAGGCAA
Figure 4	mouse_Foxp4-V5_ssODN	75 bp	GCCCCCAACCCCAGCACTGTGGGGCCTCCAGAAGACAGGGACCTGGAGGAGGACCTGGGAGGAGAGGACATGTCCGGTAAGCCTATCCCTAACCCTCTCCTCGGTCTCGATTCTACGTAAGGCCAGGGTGGCCGGGCAGGGCAGGCCAAGACCCTGCCGCCCAGTGGACCCCGGCCTACCCACCCCACTCTACAG
Figure 4	mouse_Foxq1-V5_ssODN	75 bp	CCCACGGCCCTGCAGGCGGCAGCGGCCTGCGGTCCCGGTCCGCACCTGTCCTACCCGGTGGAGACTCTGCTAGCTGGTAAGCCTATCCCTAACCCTCTCCTCGGTCTCGATTCTACGTGACAGCAGCTCTGTGCTCAGCAGAAGGGGTGCTGAGCAGCGTGGAGTTGGGGGCGCCTTTTGTTGAGGAGGTTGGAA
Figure 4	mouse_Sox1-V5_ssODN	75 bp	CGGCTGCACTCGCTGCCACAGCACTACCAGGGCGCGGGCGCGGGCGTCAACGGCACGGTGCCCCTGACGCACATCGGTAAGCCTATCCCTAACCCTCTCCTCGGTCTCGATTCTACGTAGCGCCGCGGGCACGCCGCGGACACTGCGGCTTAAGGCCGGCGCCCCGGCGACGAAGAGCGAGGCCTGCGCCCCAGC
Figure 4	mouse_Sox3-V5_ssODN	75 bp	CGGCTGCACGGCGTGCACCAGCACTACCAGGGCGCCGGGACTGCGGTCAATGGAACGCTGCCGCTGACCCACATCGGTAAGCCTATCCCTAACCCTCTCCTCGGTCTCGATTCTACGTGAGCTCCGCCCCGCGCTCCCAGCTCTTCGCCCCCACCCCGCCCCACACCCCCCACGTTGGGACGCCTTGCTGTTTAG
Figure 4	mouse_Sox4-V5_ssODN	75 bp	TGCACGCCCGAGGTGAGCGAGATGATCTCGGGAGATTGGCTGGAGTCCAGCATCTCTAACCTGGTCTTCACCTACGGTAAGCCTATCCCTAACCCTCTCCTCGGTCTCGATTCTACGTGAAGGGAGCGCGGCCCGCGGAGAAGGTGGGCCAAGAGGCAGGAGAGGAGAGAGGGAAAAAAGAAAACAAAAAACAAA
Figure 4	mouse_Sox5-V5_ssODN	75 bp	TACGATGAGGAGGAGGAGGACCCGGATGTGGATTATGGGAGTGACAGCGAAAACCACATTGCGGGACAAGCCAACGGTAAGCCTATCCCTAACCCTCTCCTCGGTCTCGATTCTACGTGATAAGGCCCAACAGACTGTGGTGAGCCGAGCACTTGAAGAAGCCCTGTCCGGTTCATCCTTCCCAGTGGCCAAGCA
Figure 4	mouse_Sox6-V5_ssODN	75 bp	TATGACGACTACGAAGATGATCCCAAATCAGACTATAGCAGCGAGAATGAGGCCCCAGAGCCTGTCAGTGGCAACGGTAAGCCTATCCCTAACCCTCTCCTCGGTCTCGATTCTACGTGAGCAGCTTTTGTTTGCTGAATTAAAACACTCTGACATTTCGCTCCCTTTCCCCCAACAACAACAACAAAGTTCTTA
Figure 4	mouse_Sox7-V5_ssODN	75 bp	GGCCCTACAGAGACCAGCCTCATCTCAGTCCTGGCTGATGCCACGGCCACGTATTACAACAGCTACAGTGTGTCAGGTAAGCCTATCCCTAACCCTCTCCTCGGTCTCGATTCTACGTAGAGCTGCAGGAATGGAGCCTGCCCCAGCCCTGCCATCCCCTCCTCCCTATGAAGCACTGAGCTGAGCAGAAACTGT
Figure 4	mouse_Sox8-V5_ssODN	75 bp	GGCTGCCTCCAACCTCTACCGAGTACACTCCGCAAGAACTCAAAGATCTGGCTAGACTTCCTGCATGCAGCAGCCTCACGTAGAATCGAGACCGAGGAGAGGGTTAGGGATAGGCTTACCGGGTCGGGTCAGGGTGGTGTACACAGGCTGGTCCCAGTTGCTGCTGGGGCTGTGTGCGGGTGGCATAGAGAGCCC
Figure 4	mouse_Sox9-V5_ssODN	75 bp	CTTTTCGTTTCTTTCTTTTCTTCTTTAAAAAAAAAAAAAAAAAAGATCAGCTCTGTCACCATAGCTTTTCTCTTCTCACGTAGAATCGAGACCGAGGAGAGGGTTAGGGATAGGCTTACCGGGTCTGCTGAGCTGTGTGTAGACTGGTTGTTCCCAGTGCTGCGGGCTGTGGGTCTGCGGGATGGAAGGGACCCC
Figure 4	mouse_Sox10-V5_ssODN	75 bp	CCCAGCCCCTCAGGGCCCCAATCCCACAGTCCCACACACTGGGAGCAGCCAGTATATACGACTCTATCCCGACCTGGTAAGCCTATCCCTAACCCTCTCCTCGGTCTCGATTCTACGTAGAGCGCCCCTGTCACCACCAGTGCCCACAGGGCCTTGGGGCCCCTTCCCCCAGCCTGTGTGCCCTGCTCCTCATCA
Figure 4	mouse_Sox11-V5_ssODN	75 bp	TGCACGCCGGAGCTGAGCGAGATGATCGCGGGGGACTGGCTGGAGGCGAACTTCTCCGACCTGGTGTTCACGTATGGTAAGCCTATCCCTAACCCTCTCCTCGGTCTCGATTCTACGTGAGAGCCGCAGCGCTCCTCGGGAGGCAGTCGTGGCGGTCAGGATAAAGAGGATGGTGGGGGGAGGGGGAGAAGATGC
Figure 4	mouse_Sox12-V5_ssODN	75 bp	CCGAGGGGCCCCAATACCTGATTCCTGTATGTAAACAGCTGGTTTGGGGGCGTGCGCGCCCCGCTGACGCTGGCCTCACGTAGAATCGAGACCGAGGAGAGGGTTAGGGATAGGCTTACCGTAGGTGAAAACCAGGTCGGCGATACTAGACGAGCGCCAGTCCCCTGCGATCATCTCGGTAACCTCGGGGGTGCA
Figure 4	mouse_Sox13-V5_ssODN	75 bp	ATGTACCGGTACAGCGAGGACGAGGACTCAGAGGGTGACGAGAAGAGTGATGAGGAGCTGGTGGTACTCACAGACGGTAAGCCTATCCCTAACCCTCTCCTCGGTCTCGATTCTACGTGATCCCCAGCTCGCTGCGCCCGGCCCGTCACCGCTGGCGGAAAGACCTTGTTCCCATCCGGACAGGCACAGCCAGCC
Figure 4	mouse_Sox14-V5_ssODN	75 bp	GTCGCCTACATCCTCTTCCCAGGCATGACCAAGACTGGCATAGACCCTTATTCGTCAGCCCACGCTACGGCCATGGGTAAGCCTATCCCTAACCCTCTCCTCGGTCTCGATTCTACGTAACCCCAAGCTTGCCCCGGACCTGATGGGTAGCGTGCAAGCAGAGATCTGAATCCTTTCCTTTGCACCTAGTCTGGC
Figure 4	mouse_Sox15-V5_ssODN	75 bp	CCTTACCTATCCCCAGACTCTTCCACTCCATATAATACTTCCCTTGCTGGAGCCCCCATGCCAGTAACCCACCTTGGTAAGCCTATCCCTAACCCTCTCCTCGGTCTCGATTCTACGTAACTGGCAGCGACGCCCAGGCCCAACCCCACAGACCCCTACAGATCTCCAAGGAACCAGAATGCACACTAAACACAA
Figure 4	mouse_Sox17-V5_ssODN	75 bp	GACAGCCACGGAGCCATTTCCTCCGTGGTGTCCGACGCTAGCTCAGCGGTCTACTATTGCAACTACCCCGACATTGGTAAGCCTATCCCTAACCCTCTCCTCGGTCTCGATTCTACGTGACGCTTGCCGACCCGACCTGAGGCCCAGAAGCAGTGTTACACACTTCCTGGAAGCGCTAAGGAAATCCTTAGCGTC
Figure 4	mouse_Sox18-V5_ssODN	75 bp	CATATGCGAAAGGAAGGGAGCAGGCAACTCTGCCACTTGGCCACATGCAGAAGCGGTGCAGGCCAAGGACAGTGTCTACGTAGAATCGAGACCGAGGAGAGGGTTAGGGATAGGCTTACCGCCTGAGATGCAAGCACTGTAATAGACCGCGCTGCTAGCATCAGACAGCGCAGAAATGAGGCTGCTCTCTTCTGG
Figure 4	mouse_Sox21-V5_ssODN	75 bp	CTCGCCTACATCCTGCTGCCAGGCATGGGCAAGCCTCAGCTGGACCCCTACCCCGCGGCCTACGCTGCCGCGCTAGGTAAGCCTATCCCTAACCCTCTCCTCGGTCTCGATTCTACGTGACCCCGCGGGCACCTGTGCACACACGTGTACATATGTATAGGTTCGAGACTCGCGCCCTTCCGCTGCGCCCTCGGG

## Sheet: crRNAs ssODN for 96-well format
Figure	TF-crRNA	crRNA sequence 5'-3'	TF-ssODN	Length of homology arms	ssODN sequence 5'-3'
Figure 5, 6	mouse_Adnp_g1	GCATATGCTATGGCACGCCA	mouse_Adnp-V5_ssODN	75 bp	CAGTCAGACTGGAAGGAGAGCAGAAGTCCAGGATGCAACACGGCCCATATGCATATGCTATGCCACGCCAGGCCCTCACGTAGAATCGAGACCGAGGAGAGGGTTAGGGATAGGCTTACCGGCTTGCTGGCTGCTCAGCTTCACTCCAGTTAAGCTGCCATGCATGGGATCAGCAACTCCGTCAGTCATGCTGTC
Figure 5, 6	mouse_Ahr_g1	GCTGCTCAAGTCGGACGAAT	mouse_Ahr-V5_ssODN	75 bp	ATGGAGATGGCCAGTGGTCTGAGCAGCGTGGCCAATGCTGCTCAAGTCGCACGAATAGCTTTCATTGAAAACACCTCACGTAGAATCGAGACCGAGGAGAGGGTTAGGGATAGGCTTACCACTCTGCACCTGAGAACAAACACAGCACAGCAGCTTGTTAGGATCTGAGGAAGACCTTAAAAACGACTTTTAGTC
Figure 5, 6	mouse_Arid2_g1	ATCCTACCCCACTGACACAG	mouse_Arid2-V5_ssODN	75 bp	ACCCTTGCCAAATGCCTTTATGAACTTAATTTTACAGTTCAGAGTAAAGAACAAGAAAAAGACTCAGAAATGCTGGGTAAGCCTATCCCTAACCCTCTCCTCGGTCTCGATTCTACGTAGTGAATCCTACCCCACTGACACAGTGCGCTCTCAAAGTCAAATACATTTCACATACTGTTACTGAAGAAAGCACCA
Figure 5, 6	mouse_Arnt2_g1	GCGTCTGGGCAGTAGAAGCC	mouse_Arnt2-V5_ssODN	75 bp	GGGACCCTCTTTGAACATGGGCATCTATGGCATGATAATAGCGTCTGGCCAGTAGAAGCCTGCCTTTGCCTGAAGCTACGTAGAATCGAGACCGAGGAGAGGGTTAGGGATAGGCTTACCCTCAGAAAATGGAGGGAACATGCCCAGGTCAGCAAAGTCCTCGATGTTATAGTTGCCAGTCCCCTGCGTCGGGTC
Figure 5, 6	mouse_Arx_g1	ACGCCCTAGGGGCGCAAGGG	mouse_Arx-V5_ssODN	75 bp	ATTTGGTCTTGAGTGGTGCTGAGTGAGGTGACCTTTCGGGGAACGCCCTAGGGCCGCAAGGGCGCAGGGCAGCCTTTACGTAGAATCGAGACCGAGGAGAGGGTTAGGGATAGGCTTACCGCACACCTCCTTCCCCGTGCTGGTGCCCGGCAGGATGTTGAGCTGCGTGAGCTGCGCGGCGTGCTCCTTAGCCTT
Figure 5, 6	mouse_Atf2_g1	ATCTAAAACTGTTGCACTGC	mouse_Atf2-V5_ssODN	75 bp	TGCAAACTGGTCTTTCCTTGATTTCCCTTTGAAGTCACTAATCAGTATCTAAAACTGTTGCACTGCAGCTTTTAATCACGTAGAATCGAGACCGAGGAGAGGGTTAGGGATAGGCTTACCACTTCCTGAGGGCTGTGCCTGGGAGGGAGGAGCCATGACAATCTGTGAAAGTGCAGGCTCCGTGCTCTGGTCCGC
Figure 5, 6	mouse_Atf4_g1	AGTTCCGTAATAGGGTAGTC	mouse_Atf4-V5_ssODN	75 bp	CTGGCCAAGGAGATCCAGTATCTGAAAGACCTGATAGAAGAGGTCCGTAAGGCAAGGGGGAAGAAGAGAGTTCCGGGTAAGCCTATCCCTAACCCTCTCCTCGGTCTCGATTCTACGTAATAGGGTAGTCAGCTGCTTTGTGCTTGTACATAGTCTTGTGTTGCTGTGTTTGCTGTAATAAATTATTTTGTAGTG
Figure 5, 6	mouse_Bach2_g1	CAGAGCTGATCACACCGGCT	mouse_Bach2-V5_ssODN	75 bp	AGAAGAACACCCAGATGAGAGAGGTGTGAAGACCCGGGGGTAGGGTGGTGGGTAGGGCAGAGCTGATCACACCGCCTACGTAGAATCGAGACCGAGGAGAGGGTTAGGGATAGGCTTACCGGCATAATCTTTCCTGGGCTGTTCGTCCGTTGTACACTTCTCAGTCATTTCCTGGCAGAAGTCCACCGTCACAGA
Figure 5, 6	mouse_Baz2a_g1	AATCTGTGAGGCAAGGAAGT	mouse_Baz2a-V5_ssODN	75 bp	AAGGCTGGGCACGTCATGCGACGCTTCTTTGAGAGCCGCTGGGAGGAATTTTATCAGGGAAAACAGGCCAATCTGGGTAAGCCTATCCCTAACCCTCTCCTCGGTCTCGATTCTACGTGAGGCAAGGAAGTTGCGAGTCACTTTGTGCCATCTTCTCCAACCTTCCAAACAAAAACCTGCCGTTCTCACCTGCTG
Figure 5, 6	mouse_Baz2b_g1	GTCCTTGTTTAAAAGGAAAA	mouse_Baz2b-V5_ssODN	75 bp	TGTGAATGCAGTTCACACCGCTGGTCTTGTTTGTCCTTGTTTAAAAGGAAAAAGCAGAAAAAGCAGATTACAACTTCACGTAGAATCGAGACCGAGGAGAGGGTTAGGGATAGGCTTACCGCTCACTTTGAAGGTATCTGTCCACTTTTTTTCAAAGTATTTTCGCATACTGTGGCCAGCTCTGCCTATGTCCGA
Figure 5, 6	mouse_Bbx_g1	ACAATTAAAGGGCGCGTCAC	mouse_Bbx-V5_ssODN	75 bp	GACTCGCTAGCATCCCTGGTAAAGACAAGGCTAGGGTAGAAGGTGAAGCACAATGTTTTACAATTAAAGCGCGCGTCACGTAGAATCGAGACCGAGGAGAGGGTTAGGGATAGGCTTACCCTGGTCAGCACAAGAAATAAGTACAGGAGCCTGCGGCATTTCTTTTGGCTGTCCATCATGGGTGAGCGGAGTTGA
Figure 5, 6	mouse_Bhlhe40_g1	ACCAAAGACTAAACTCTGGA	mouse_Bhlhe40-V5_ssODN	75 bp	CATTCGTCCCTCGACTCTTCGGCCTTGCTCCAGGCTTTGAAGCAGATCCCTCCTTTAAACTTAGAAACCAAAGACGGTAAGCCTATCCCTAACCCTCTCCTCGGTCTCGATTCTACGTAAACTCTGGAGGGATCTCCTGCTGCCTTGCTTTCTTTCCTCCCTAATTCCAAAAACCACAAAGGTTTCCCTGAGTGC
Figure 5, 6	mouse_Cbfb_g1	TGATCTCAAACTTCGTTAAG	mouse_Cbfb-V5_ssODN	75 bp	TCATTGCAGGCAAGAAGACAGCAAGACCCTAGTCCTGGTTCTAACTTAGGTGGCGGTGATGATCTCAAACTTCGTGGTAAGCCTATCCCTAACCCTCTCCTCGGTCTCGATTCTACGTAAGTGGAGCACAGCTTATGTGCCCCATCTCTACACACACTGCTTCTAGTTGGTATAAATAACTCATTGGGCGACCAG
Figure 5, 6	mouse_Cenpb_g1	GGACATCAAAGCTGAGCTGC	mouse_Cenpb-V5_ssODN	75 bp	CCAGCAGCTGCCCAGAGTTCTCTGCCTTGGGCAGGAGCAGCCCATCTGGGCTGGGCTACAGCTATGTCCAGCAGCTCACGTAGAATCGAGACCGAGGAGAGGGTTAGGGATAGGCTTACCGCTTTGATGTCCAAGACCCCGAACTCCCGCCTGCCTGGCATGGTTCTTCCTAGTCACGTGGACCAGATCGTGTTC
Figure 5, 6	mouse_Cers2_g1	GTGGGAGGCAGCTAGGACAA	mouse_Cers2-V5_ssODN	75 bp	CAAATGCCCCTAAAGGGAAGCTTGGCTAGTTTCTTGGCCTCATGCATTGATGTGGGAGGCAGCTAGGACAATGCTTCACGTAGAATCGAGACCGAGGAGAGGGTTAGGGATAGGCTTACCGTCATTCTTAGGATGATTGTTATTGAGGATGGGGTGGCCATTAGCTAGGAGCCGGCTCTTTGCTCCTGCCCCAGC
Figure 5, 6	mouse_Chd1_g1	TCATGTCTTCCGACTACTCC	mouse_Chd1-V5_ssODN	75 bp	TGTAAGGCAATTACTGTGTTGGTTTATGATCTATGGCTAAAACAAAGTCCCGCAAGACAAACTCATGAGCTTCTGTCACGTAGAATCGAGACCGAGGAGAGGGTTAGGGATAGGCTTACCTGTCTTCCGACTACTCCAGCTGTGTTCAGGCGTACTTCTGTGTTCAGCTGAATGTTCAAATGGGGACCTGGAGCC
Figure 5, 6	mouse_Chd2_g1	TCCGCGATCTCCCTGTCTTC	mouse_Chd2-V5_ssODN	75 bp	GCCACAGCTGCATCGGAGCAGAACGCCCAAGTGCTTGATGACTTCCGCGATCTCCCTGTCTTCAGCAGTGGTCCTTTACGTAGAATCGAGACCGAGGAGAGGGTTAGGGATAGGCTTACCTGTTTTCCGAACATTCCAGTTATAATCTGGGTTGTTTTTCTGTTCTAGTGATCTCTCCAAAGGAGACCTATGATC
Figure 5, 6	mouse_Cic_g1	GGGCCCTTGTTAAAGACCCC	mouse_Cic-V5_ssODN	75 bp	GGACAGCCTGGCTGGGAGGGGGCTCCCCAGCCCTCACCACCTCCCTCTGGCCCTTCCACAGCTGCCACAGGCAGGGGTAAGCCTATCCCTAACCCTCTCCTCGGTCTCGATTCTACGTGAGGGGCCCTTGTTAAAGACCCCAGCACCCACAGTACCCCCCCCTCAGGATATGGACAGTATATAGATGGCAGGAAT
Figure 5, 6	mouse_Clock_g1	CTTCCTCTCTGACATGCGAG	mouse_Clock-V5_ssODN	75 bp	CAGCCTCAGCAGCAACAGCAGCTTCCTCGGCACAGGACTGACAGCCTGACTGACCCTTCCAAGGTCCAGCCACAGGGTAAGCCTATCCCTAACCCTCTCCTCGGTCTCGATTCTACGTAGCACACACACTTCCTCTCTGACATGCGAGAGCAAGGGGATGGCCAGAAAGAATCGCTCAGTTGGCATGCGGTCAGA
Figure 5, 6	mouse_Cramp1l_g1	GCTTTGTGACACGGGCATCG	mouse_Cramp1l-V5_ssODN	75 bp	ATCACTGAGCCTGGCCGCCGGGAGGTTCTTTTTGATGGTGGAGGAGGTGGTAATCCTGTTGGTGACCTCTCTCAGGGTAAGCCTATCCCTAACCCTCTCCTCGGTCTCGATTCTACGTGACTATGCTTTGTGACACGGGCATCGTGCAATCCACAAAGCAGGTCTACGGAGCTGGTCCCATGAATCTGTCTGCAC
Figure 5, 6	mouse_Creb1_g1	TGCCACAAATCAGATTAATT	mouse_Creb1-V5_ssODN	75 bp	GTGCTTGAAAACCAAAACAAAACATTGATTGAGGAGCTAAAAGCACTTAAGGACCTTTACTGCCACAAATCAGATGGTAAGCCTATCCCTAACCCTCTCCTCGGTCTCGATTCTACGTAATTTGGGATTTAAGTTCTCTCCTGTTACGGTGCAGAATGGACTGGCTTGGCCACAACCAGAAAGACAAGTAAACAT
Figure 5, 6	mouse_Creb5_g1	TAAAAGGCATCGGTCAAACC	mouse_Creb5-V5_ssODN	75 bp	TCGGTCAGCGAGGTCGTGGGGAGCTCCACCCTCAGTCAGCTTACAACTCACAGAACAGACCTGAATCCTATTCTTGGTAAGCCTATCCCTAACCCTCTCCTCGGTCTCGATTCTACGTAAAAGGCATCGGTCAAACCTGCCCTTTGAGAAGAGCTGTAGCATGCCGTACATCCTTTCTCAAAGGGGCATTTTTTT
Figure 5, 6	mouse_Csde1_g1	TTAATTCACTATGGTCGAGT	mouse_Csde1-V5_ssODN	75 bp	CAAATCATTAACTGTTATATTTCTTCATAGGGATTTGGTGCAGAAAGAAAGATCCGTCAAGCTGGTGTCATTGACGGTAAGCCTATCCCTAACCCTCTCCTCGGTCTCGATTCTACGTAACCACGTCCACAAAGCACATCATTAATTCACTATGGTCGAGTTGCGGGGATTCTGGTGAAGGGTTCTGAATATCTT
Figure 5, 6	mouse_Ctcf_g1	GCATGATGGACCGGTGATGC	mouse_Ctcf-V5_ssODN	75 bp	GAGGCTCAGGCAGCCACCACAGACGCCCCCAACGGAGACCTCACGCCTGAGATGATCCTCAGCATGATGGACCGGGGTAAGCCTATCCCTAACCCTCTCCTCGGTCTCGATTCTACGTGATGCTGGGGCCTTGCTCGGCACCAGCACTATTGGGCTGTGTTTAAACGGCCCAAATCTTAATTTTTCTCTTTTTTT
Figure 5, 6	mouse_Ddit3_g1	CTGCACCAAGCATGAACAGT	mouse_Ddit3-V5_ssODN	75 bp	GGTCACATGCTTGGCGCTGGCGCGATGGTGCTGGGTACACTTCCGGAGAGACAGACAGCAGGTGATGCCCACTGTTCACGTAGAATCGAGACCGAGGAGAGGGTTAGGGATAGGCTTACCTGCTTGGTGCAGGCTGACCATGCGGTCGATCAGAGCCCGCCGTGTGGTCTCCACCTCCCTGGTCAGGCGCTCGAT
Figure 5, 6	mouse_Dek_g1	TTTCTTGAGAAGCGGACAGA	mouse_Dek-V5_ssODN	75 bp	TAAGATTTTATGATATATGCATATTTGGTGTTGTTTGTGGTAAAGCAGTTTTCTTTTTCATTGCAGCTAATTTCTGGTAAGCCTATCCCTAACCCTCTCCTCGGTCTCGATTCTACGTGAGAAGCGGACAGATGCCTTGTTCTCAGATTTGAAGATCTGATTTTATACCAGCAAAGAGAATGTATTCTTTTTTAA
Figure 5, 6	mouse_Dmrta1_g1	AACACTGCAGAATGGTAGAG	mouse_Dmrta1-V5_ssODN	75 bp	TGTGTGTGTGTGTGTGTGTGTGTGTGTGTGTGTTGCATGGCTCTAGAAACACTGCAGAATGCTAGAGTGCATATGTTACGTAGAATCGAGACCGAGGAGAGGGTTAGGGATAGGCTTACCCAGATGCTCCTGATTGGGCCTGAAATACAGTCTACCACCAGCTACTAAGTGCTTGCTAGGGAGGTGGGACGGCTC
Figure 5, 6	mouse_Dmtf1_g1	GTCACTAGATTATTAGAAAC	mouse_Dmtf1-V5_ssODN	75 bp	AATATAATTGGATCATCTTTGGGCAGTCCTGTTTCTGAAGACTCAAAGGATGTTGAGGACTTAGTAAACTGTCACGGTAAGCCTATCCCTAACCCTCTCCTCGGTCTCGATTCTACGTAGATTATTAGAAACAGCTACTTCAAGAAGCCACATTGTGACTACATTGTCTCCAAAGAAAGGAGCCATCCCAGGAGT
Figure 5, 6	mouse_Dnajc1_g1	TAAAAGCTGAATCTTCTGGA	mouse_Dnajc1-V5_ssODN	75 bp	TTCCCACAGGAAGACTGCATTGCTAGATACAAGCTGCTGGTTGAACTGGTCCAAAAGAAAAAGCAGGCTAAAAGCGGTAAGCCTATCCCTAACCCTCTCCTCGGTCTCGATTCTACGTGAATCTTCTGGAAGCTGGCTACAGAAAAACAAAGTGAGCCGGGCATCCTGGAGCTGGAGTGACAGGTGCTGAGAGCA
Figure 5, 6	mouse_Dpf2_g1	AGAGCAACGGCCTTAGATGC	mouse_Dpf2-V5_ssODN	75 bp	GAGGAGAGAGGGGCAATGGAAACCAAGGTAGAGAGGAGAGCAACGGCCTTAGATGCAGCGGAGCTGGGTGGCACATCACGTAGAATCGAGACCGAGGAGAGGGTTAGGGATAGGCTTACCGGAGGAGTTCTGGTTCTGGTAGATGGATGCTTTCTCCTTCAGCAGATCCAGACACAGGTGGCAACTCCAACTTCC
Figure 5, 6	mouse_Drap1_g1	GTACAGGGGCACAGGGCGCT	mouse_Drap1-V5_ssODN	75 bp	CCACCTTTCTCCTCTCCCCAAAGCAATTAATACTAACTAGAAGAGAGCATGGCTGGGGTACAGGGGCACAGCGCGCTACGTAGAATCGAGACCGAGGAGAGGGTTAGGGATAGGCTTACCGGAGTCATAATCCTCTTCATCCTCTGCATCGGCTGCTGAGGGGCCGGGGGGTGCTGGTGGCAAAGGCAGGGGAGA
Figure 5, 6	mouse_E2f3_g1	GGACTTCATGTGTAGTTGAT	mouse_E2f3-V5_ssODN	75 bp	CAACACTGCGATACACGTTTCTGATTCCGTGATAAAAAAATATTGCTTTATAAGGACAGTTTGTACAAAGCCCAATCACGTAGAATCGAGACCGAGGAGAGGGTTAGGGATAGGCTTACCACTACACATGAAGTCCTCCACCAGAGGCAGCTTTTCCAAATCATAGGCATCGAAGAGGTCACTGATGCCCTCTTC
Figure 5, 6	mouse_E2f7_g1	GACTAGCCTGATGCTTCGGT	mouse_E2f7-V5_ssODN	75 bp	AGAAAAGAAAGGAACCAATCAAGAAACACTAGCTCAGCCCAGAGGAGACTAGAAATCTCTAGCAGCGGGCCTGACGGTAAGCCTATCCCTAACCCTCTCCTCGGTCTCGATTCTACGTAGCCTGATGCTTCGGTGGCTGGCATGGCCTCAGTGCCTGACGCTCCCTGTGTCCCAGACAAATGTCCTAAGTGGAAC
Figure 5, 6	mouse_Egr1_g1	GGACAATTGAAATTTGCTAA	mouse_Egr1-V5_ssODN	75 bp	AGCAGCTCCTTCAGCACCTCAACTGGTCTTTCAGACATGACAGCGACCTTTTCTCCCAGGACAATTGAAATTTGCGGTAAGCCTATCCCTAACCCTCTCCTCGGTCTCGATTCTACGTAAAGGGAATAAAAGAAAGCAAAGGGAGAGCCAGGAAAGACATAAAAGCACAGGAGGGAAGAGATGGCCGCAAGAGGG
Figure 5, 6	mouse_Elk4_g1	CTCTCAGTCCACAACTGCAC	mouse_Elk4-V5_ssODN	75 bp	GCCCTCATTTCGAACCGAGTCATGGCGGGTGTCTGTTTCCTAGTCCCTTGGTCTCTCAGTGCACAACTGCACTGCTTACGTAGAATCGAGACCGAGGAGAGGGTTAGGGATAGGCTTACCTGTCTTCTGCAGGTCTGGAGAAAATGGGCCCGGAGTGGAAGGTCCGTCCAGGCCTGACAGAGTGAACGGGCCATG
Figure 5, 6	mouse_Ep400_g1	TCAACCAATTTCCATCCTAC	mouse_Ep400-V5_ssODN	75 bp	CAGCAGATCCCAGAGTCCACAAACAGTATAGAGTTCTGCCAGCACAGCCTAACATAGTATCAACCAATTTCCATCCTACGTAGAATCGAGACCGAGGAGAGGGTTAGGGATAGGCTTACCCTGGCATGGAGGTTTGGTGGGCGTCTTCAGCCTCACAGCAGGAACTCTCATTTGCAACTTTGGCTGCTGGCTTGG
Figure 5, 6	mouse_Erf_g1	GGCCCGTGCCCACAGCTCTC	mouse_Erf-V5_ssODN	75 bp	ACGGGGCGGTTAAGGCAGCAAAAGCTCAGGGAGTGGGGTGGTGGGTGGGTGGGGGTGGGCCCGTGCCCACAGCTCTCACGTAGAATCGAGACCGAGGAGAGGGTTAGGGATAGGCTTACCGGAATCTCGGTGCTCCAGGGAGAGTTGGGCTGTGGCGTGCTGGAGGTCAGAGCTCACCCGTCGTGGGGTAAGGGG
Figure 5, 6	mouse_Etv1_g1	AAAAAAAGAGGCGAAGCACG	mouse_Etv1-V5_ssODN	75 bp	GAATTCGGTGATTCTCTGCATCTTGAAAAAAAAAGAGGCGAAGCACGGGCTGCCTTGCTTGACGGGTTACTCATGTTACGTAGAATCGAGACCGAGGAGAGGGTTAGGGATAGGCTTACCGTACACGTATCCTTCGTTGTAGGGGTGAGGGTTGCAGCAGCCCCCTTCGGGCATGTAGGTCATGCTCTCATCAAA
Figure 5, 6	mouse_Etv4_g1	AGCAACCCCACCATGTCAAG	mouse_Etv4-V5_ssODN	75 bp	GGGCCTTCACCAATACCAAATCAGTTGATATATACACTGAGCAACCCCACCATGTCAAGGGCAAGCCACTGCTGCCTACGTAGAATCGAGACCGAGGAGAGGGTTAGGGATAGGCTTACCGTAAGAATATCCACCTCTGTGGCCGAAGGGCGGAGCGGGGCCAGTGAGTTCTGGGAGGTAGGCAGGACTCTCATC
Figure 5, 6	mouse_Ezh2_g1	GGAAGAGGTAGTAGATGTCA	mouse_Ezh2-V5_ssODN	75 bp	TAAATTGCCCACAGTACTCAAGGTTCCTGAAGCTAAGGCAGCTGTTTCAGAGAGAAGGGCAAGAGGTAGTAGATGTCACGTAGAATCGAGACCGAGGAGAGGGTTAGGGATAGGCTTACCAGGGATTTCCATTTCTCGTTCGATGCCCACATACTTCAGGGCATCAGCCTGGCTGTATCTGAAACAATATGAACA
Figure 5, 6	mouse_Farsa_g1	CACAGGAGGCTGCATGATAT	mouse_Farsa-V5_ssODN	75 bp	CAGAGGCCTCATAAATAGTAGGTCACTGCCAAGAGATGCACAGGGACTAGACAGCGATCTCTGGAACAGCCTATATCACGTAGAATCGAGACCGAGGAGAGGGTTAGGGATAGGCTTACCTGCAGCCTCCTGTGTCTTTGAGGACCTGGGCTCAATATCCAGTCGGCACACAGGGCTGTCGTATACCATCTGCAG
Figure 5, 6	mouse_Gatad1_g1	CTGCGAAGTAAGTATGTCCC	mouse_Gatad1-V5_ssODN	75 bp	GGATGTGTGTGTTCTAGGGTTAAAACTGAGGCTTTATACCTGCGAAGTAAGTATGTCCCAGCTTTGCTTTTGTAACTACGTAGAATCGAGACCGAGGAGAGGGTTAGGGATAGGCTTACCCAAGTGGTTGGCAACTGTTTCCTTAATAGTTATCGCAGGAGTAGGTCCAACGTGAGTCCATATGTAGCCCTTCTC
Figure 5, 6	mouse_Gli1_g1	CTCTAGTGCCTAAAAGGGTA	mouse_Gli1-V5_ssODN	75 bp	AACATGGCAGTGGGTAACATGAGTGTCTTGCTGGGGTCTCTGCCTGGAGAGACACAATTCCTCAACTCTAGTGCCGGTAAGCCTATCCCTAACCCTCTCCTCGGTCTCGATTCTACGTAAAAGGGTAAGGAACCCCAAGCAGATGCTATTTCCTAAATGGCTACATGAGGTGCCCAGGGATGGGAGGTTTGGGCT
Figure 5, 6	mouse_Gli3_g1	TATGCAGTAGGCGGTAGGCA	mouse_Gli3-V5_ssODN	75 bp	AACATGGCTATCGGGGATATGAGTTCTTTGCTGACCTCCCTTGCAGAAGAAAGCAAGTTCCTTGCAGTTATGCAGGGTAAGCCTATCCCTAACCCTCTCCTCGGTCTCGATTCTACGTAGGCGGTAGGCAAGCAGGACCACAAACACAAAGACTGAAATGACTTGGGATTTTTTTTTCTTTTTTAAGTTCTGTGT
Figure 5, 6	mouse_Glis3_g1	CCGAAGGCTGAAAGCTCCCG	mouse_Glis3-V5_ssODN	75 bp	GAAGACCCCACGTTCTTGCAGCTCAGTGCTGTGGACCGCTGTCCTAGCCAGCTCTCCTCTGTGTATACCGAAGGCGGTAAGCCTATCCCTAACCCTCTCCTCGGTCTCGATTCTACGTGAAAGCTCCCGGGGTTCTGCACATTTGCGACCTTTGAGTAACTCGTCGCCTCTTATTTTCATTCTCTCACAAGCCGT
Figure 5, 6	mouse_Gmeb1_g1	GTGGTCTTGGAGGACTGATT	mouse_Gmeb1-V5_ssODN	75 bp	GAGGAGAAAGTGGTAGCCGAAATGGAAGAACACCAGCATCAGGTCCACAATGTGGAGATTGTGGTCTTGGAGGACGGTAAGCCTATCCCTAACCCTCTCCTCGGTCTCGATTCTACGTGATTGGGGACAGGGCCAAGAGCTGTGTTTTGGTTTGGAATTTTAATTATGTTTATTTTTATCATTGTCCCGCTCATT
Figure 5, 6	mouse_Gon4l_g1	CTAGACGAGTGACATCTGCC	mouse_Gon4l-V5_ssODN	75 bp	TGTCCTCAAGGTCTCCACGAGTGAGGCGCGCCCTATCTCCAGTGCTGATGGCTGTAGGCTGGGTCCTGGCAGATGTCACGTAGAATCGAGACCGAGGAGAGGGTTAGGGATAGGCTTACCCTCGTCTAGCTCCTCTTCTGACAGCAGGTCCCCGTGGTCAGAGAGCTGGTCTGCGTTGCTGGTGCTGGTAGCATC
Figure 5, 6	mouse_Gpatch8_g1	TCGGAAGCCTGTGTTGAGCC	mouse_Gpatch8-V5_ssODN	75 bp	GCCCTCCATCTTCACCCACTGCTTCACCCCATCTTCTCAGGTCAGGACCTGCAGCACCCTCCCAGCCATGGGACTGGTAAGCCTATCCCTAACCCTCTCCTCGGTCTCGATTCTACGTGAGTTGGGAGTCGGAAGCCTGTGTTGAGCCAGCGAAGGTGGCCTGTTCTTCCCTTGGGGGTGTTGAGCCATTTATAC
Figure 5, 6	mouse_Gsx2_g1	AGGAGATTTCCCCCTTGTAA	mouse_Gsx2-V5_ssODN	75 bp	CATTATGCGCGCTCCGAGGACGAGGACTCCTTGTCCCCTGCCTCGGCTAACGAAGACAAGGAGATTTCCCCCTTGGGTAAGCCTATCCCTAACCCTCTCCTCGGTCTCGATTCTACGTAAAGGCAGAGGCTCCTTCTGCTACCTGCTCCCGGTACCCTGCCCTCCTCCTCCCCATCAGCACAGGGACCAAAGTTC
Figure 5, 6	mouse_Helz_g1	CTCTGAGGACAGCGCGAGCG	mouse_Helz-V5_ssODN	75 bp	CGCACACAGAGCCGCCACCTCCATCCTGCAGACTGGACAGGAACCGCATATTCTCTGAGCACAGCGCGAGCGGGCTCACGTAGAATCGAGACCGAGGAGAGGGTTAGGGATAGGCTTACCCTTGAAGTAGGAGTAGAAGCCATTGCTGCCCGGGCTGCTGCCCAGACTGAGCTCCTGGAGCAGGGACAGCGGGTC
Figure 5, 6	mouse_Hes1_g1	AGGGACTTTACGGGTAGCAG	mouse_Hes1-V5_ssODN	75 bp	CCAAGTTCGTTTTTAGTGTCCGTCAGAAGAGAGAGGTGGGCTAGGGACTTTACGGCTAGCAGTGCCCTGAGGCTCTCACGTAGAATCGAGACCGAGGAGAGGGTTAGGGATAGGCTTACCGTTCCGCCACGGTCTCCACATGGAGTCCGAAGTGAGCGAGGAGCCACTGGAAGGTGACACTGCGTTAGGACCCAC
Figure 5, 6	mouse_Hes5_g1	CCCAGCGGCCGACCGGTGCC	mouse_Hes5-V5_ssODN	75 bp	CGCTCCTCCGCTAAGGCTGCTGCTGCTGCGGTCTCCACCTCGCGCCAACCCGCCTGCGGCCTCTGGCGGCCCTGGGGTAAGCCTATCCCTAACCCTCTCCTCGGTCTCGATTCTACGTGACCCAGCGGCCGACCGCTGCCTGCAGCGGACCAGAGGATGAGCTCGTTCCTCTGGATGTGGGAAGACATTCCCCAG
Figure 5, 6	mouse_Hes6_g1	TTGGTGACCAACACTTACCA	mouse_Hes6-V5_ssODN	75 bp	GGGCCGGATTTGGTGTCTACATCCTTAGGCAGCCTGACTGCAGCTCGCCGGGCTCAGAGTGTGTGGAGGCCTTGGGGTAAGCCTATCCCTAACCCTCTCCTCGGTCTCGATTCTACGTGACCAACACTTACCAGGCACCTGTGAATGCTGGCTGCCATCCTTAAGTTTGCTTCCTCCCTGGGTATCAGATAAGGT
Figure 5, 6	mouse_Hif1a_g1	CAATCAAAAGGAATGAGATT	mouse_Hif1a-V5_ssODN	75 bp	AGAAACAAAAACCCAACAAACAACAACAACTGAACAAAAACATTAACAATCAAAAGCAATGAGATTAGCAAACGCTCACGTAGAATCGAGACCGAGGAGAGGGTTAGGGATAGGCTTACCGTTAACTTGATCCAAAGCTCTGAGTAATTCTTCACCCTGCAGTAGGTTTCTGCTGCCTTGTATGGGAGCATTAAC
Figure 5, 6	mouse_Hopx_g1	CTGTTACGGACTAGGGAGCC	mouse_Hopx-V5_ssODN	75 bp	AAATGGTTTAAGCAGCGCCTGGCAGAGTGGCGGCGGTCAGAAGGCTTGCCTTCGGAATGCAGATCTGTTACGGACGGTAAGCCTATCCCTAACCCTCTCCTCGGTCTCGATTCTACGTAGGGAGCCAGGCCCTTGAGCTTGCTCTTGGAACTCCATCTCTTCTTCCTTCCCTCGGCTTACCCAGGCTGTTTTGAT
Figure 5, 6	mouse_Hoxa6_g1	GGCGAGTAGACTCCAGTGCA	mouse_Hoxa6-V5_ssODN	75 bp	AAGTGGAAAAAGGAAAATAAACTCATCAACTCCACGCAGGCCAGCGGGGAAGACTCTGAGGCCAAAGCGGGCGAGGGTAAGCCTATCCCTAACCCTCTCCTCGGTCTCGATTCTACGTAGACTCCAGTGCAGGCAGCAGGCCAGCGTTGTAACCTCTATTGGCTTTGCCCCCTGGTGCCCTTGTCTGCTCCCCAA
Figure 5, 6	mouse_Id3_g1	TGCCACTGACCCGGTCGTCC	mouse_Id3-V5_ssODN	75 bp	CCTAACCTTCTTTCACAGACAGCTGAGCTCACTCCGGAACTTGTGATCTCCAAGGACAAGAGGAGCTTTTGCCACGGTAAGCCTATCCCTAACCCTCTCCTCGGTCTCGATTCTACGTGACCCGGTCGTCCTGCCACCTCCCGAACGCAGCTGCTGGCGCCCGTTCCGCTTGGGACCCTGGGACTCTGGGACCCT
Figure 5, 6	mouse_Jazf1_g1	AAGATGCAGCAGTAGCGTGC	mouse_Jazf1-V5_ssODN	75 bp	CCCTGAAAAAAGGTGGCTGTTTTCAAAATCAGCAACTGCTGGTGAGGATTTCTTGCCACAGTTCTGACCAGCACGCTACGTAGAATCGAGACCGAGGAGAGGGTTAGGGATAGGCTTACCCTGCTGCATCTTCCTGATCATCTCGGCAGACACTGGGGGATGGAAATTGATTGTGTGGTGCCGCAGGCCCTGAGC
Figure 5, 6	mouse_Jun_g1	CGTTTTGAGAACAGACTGTC	mouse_Jun-V5_ssODN	75 bp	CAGCTTAAGCAGAAAGTCATGAACCACGTTAACAGTGGGTGCCAACTCATGCTAACGCAGCAGTTGCAAACGTTTGGTAAGCCTATCCCTAACCCTCTCCTCGGTCTCGATTCTACGTGAGAACAGACTGTCAGCGCTGAGGCGCAATGGAAGAAAAAAAATAACAGAGACAAACTTGAGAACTTGACTGGTTGC
Figure 5, 6	mouse_Jund_g1	GGCGTACTGAGCCCGAGCGC	mouse_Jund-V5_ssODN	75 bp	CAGCTCAAACAGAAAGTCCTCAGCCACGTCAACAGCGGCTGCCAGCTGCTGCCCCAGCACCAGGTCCCGGCGTACGGTAAGCCTATCCCTAACCCTCTCCTCGGTCTCGATTCTACGTGAGCCCGAGCGCGGCGCGCATGCGCGGACTAGCTGCGCTGGGGGGGCGCCCCGGACTCTTTCGAGACTCGGTGCCCC
Figure 5, 6	mouse_Klf10_g1	GCACAGTGACGGCCAGAAGA	mouse_Klf10-V5_ssODN	75 bp	AAGCTGCCAAACTGGCAAATGGAAGTTAGCAAGTTAAATGACATTGCTCTGCCTCCGACCCCTGCTTCCGCACAGGGTAAGCCTATCCCTAACCCTCTCCTCGGTCTCGATTCTACGTGACGGCCAGAAGATGCAGACGCAGAATAAACTTTGCTCAGAGTCAGGAGCCAGTGATGGTGTCAAGTGCTTCTGCAA
Figure 5, 6	mouse_Klf13_g1	TCACCCTGAGCACCCGCGCC	mouse_Klf13-V5_ssODN	75 bp	TCGAGGACCGGCTCGCTCAGCGACTACAGCCGCTCCGATGCCAGCAGCCCCACCATCAGCCCGGCCAGCTCACCCGGTAAGCCTATCCCTAACCCTCTCCTCGGTCTCGATTCTACGTGAGCACCCGCGCCTGCACCGCGCCTCCTCACCCCTTTGCTAATAGGAAAGCTGAGCGAACTTGAGAAGTCCACAGCA
Figure 5, 6	mouse_Klf3_g1	AGCGGGGAATCACACTGAGC	mouse_Klf3-V5_ssODN	75 bp	AGATAGGAGAGAGAGAGAGAGAAAGAGAGAGAGGCCAGGAAGAGCGGGGAATCACACTGAGCTGCAGACAGGTTTTCACGTAGAATCGAGACCGAGGAGAGGGTTAGGGATAGGCTTACCGACTAGCATGTGGCGTTTCCTGTGTAGGGCAAGGTGGTCAGAGCGAGAGAAGCTTCGGTCACAGTCTGGACACTG
Figure 5, 6	mouse_Klf6_g1	AGCAGAGGGACGAATCCTGT	mouse_Klf6-V5_ssODN	75 bp	GCTTTGTTTCTGATTTGCCCTTGCAGGTGTTTCTCCAGGTCTGACCACCTGGCCCTGCACATGAAGAGGCACCTCGGTAAGCCTATCCCTAACCCTCTCCTCGGTCTCGATTCTACGTGAAGGAGCAGAGGGACGAATCCTGTAGCCTAAAAGAGCCTTCCAGGCTAAGAGGCGGCCATGGAAGGAGGGATGCCT
Figure 5, 6	mouse_Kmt2c_g1	AGCCACCCGGTGAGATAGCA	mouse_Kmt2c-V5_ssODN	75 bp	TCTGCAAAATCCAATGAAGTGTTGAATCGCCTCTTCCTAGGGACGAGCCACCCGCTGAGATAGCAAGCAATGCATTCACGTAGAATCGAGACCGAGGAGAGGGTTAGGGATAGGCTTACCGTTCATCCACTTCCGGCAGTTCACCGCTCCACAGTGACACGGAATCTTGTGCTGGTCATCTTCAAAGTCAAACTT
Figure 5, 6	mouse_Kmt2d_g1	ATGGGGGGAATTCCCCTGCC	mouse_Kmt2d-V5_ssODN	75 bp	TCTCTTCCCCCTCGTCCCTTTCAGGGAGGAGGCGGGAATGGCGGGAATTCCCCTGCCTGCTAGCCTCAAAGCTTCTTACGTAGAATCGAGACCGAGGAGAGGGTTAGGGATAGGCTTACCGTTCATCCATTTCCTACAGTTCCAGGCTCCACAGTGACAGGGGATCTTGTGCTGATCGTCCTCAAAGTCAAACTG
Figure 5, 6	mouse_Lhx2_g1	AAAGAAATCGTGGGGGCTCG	mouse_Lhx2-V5_ssODN	75 bp	ACTTGGAATTCAACTAAAGATAATTTCTTTTTTAAAGAAATCGTGGGGGCTCGGGCAGAAGCGGGTGGCGAGTCATTACGTAGAATCGAGACCGAGGAGAGGGTTAGGGATAGGCTTACCGAAAAGGTTGGTAAGAGTCGTTTGTGAAGGGCTGTGGGGCTCGTGGCCCTCCAGGTTGCCAGGCACAGAAGTTAA
Figure 5, 6	mouse_Mafg_g1	TAGGGACACGTGCAGTTGCC	mouse_Mafg-V5_ssODN	75 bp	GGGCCCCTGGTTCCTGGCAAGGTGGCTGCCACCAGCGTCATCACAATAGTAAAGTCCAAGACGGATGCTCGGTCAGGTAAGCCTATCCCTAACCCTCTCCTCGGTCTCGATTCTACGTAGGGACACGTGCAGTTGCCAGCCAGGTCTTTGAGGGGCCACTAGGTGCGTGGCAGAGTTGGCAGCCCCGTCCCTCTT
Figure 5, 6	mouse_Mafk_g1	AGCCGCCTCCTAGTGTCTGC	mouse_Mafk-V5_ssODN	75 bp	GCCACCACCAGTGTCATCACCATCGTCAAATCTGCCGAGCTCTCCTCCACCTCTGTACCCTTCTCAGCCGCCTCCGGTAAGCCTATCCCTAACCCTCTCCTCGGTCTCGATTCTACGTAGTGTCTGCTGGGGCCGGGCAGCGTGCGGGCAGTGGCACAGCCCTCATGCCTATCCCAGGCTCCCTGGCACAGATTC
Figure 5, 6	mouse_Maz_g1	TTGGTGAGCTCCAAGTTGAT	mouse_Maz-V5_ssODN	75 bp	CCCACAGCTGTGGGCTCCCTCTCTGGGGCAGAGGGGGTACCAGTGAGCTCTCAGCCACTTCCCTCCCAGCCTTGGGGTAAGCCTATCCCTAACCCTCTCCTCGGTCTCGATTCTACGTGAGCTCCAAGTTGATGGCGCAGAGGGGAGAGTGGAGGAAAGCTCTTCTTGGTACAGTCTCCTCTTCCCACCAACTCC
Figure 5, 6	mouse_Mbd3_g1	AGCCAGAGCGAGTGTAGCAC	mouse_Mbd3-V5_ssODN	75 bp	CCACTGGACAAGGCCTGTGCAGAGGAGGAAGAGGAGGAGGAAGAGGAGGAGGAAGAGCCGGAGCCAGAGCGAGTGGGTAAGCCTATCCCTAACCCTCTCCTCGGTCTCGATTCTACGTAGCACAGGTGCCCTGCCCAAGTCTGGCCTGCAGACTGCCTTCAGCCTTGCCTGGACCAGGTAGGGGCCAGACCTGTA
Figure 5, 6	mouse_Mbnl1_g1	TGTGACGACAGCTCTACATC	mouse_Mbnl1-V5_ssODN	75 bp	TCAAGCACACTGTCCTTTCCTCTTTGTATGATTGTTTTGTGACGACAGCTCTACATCTGCGTAACATACTTGTGCCTACGTAGAATCGAGACCGAGGAGAGGGTTAGGGATAGGCTTACCGTCAGATGTTCGGCAGATATTATGGGTATCTAGCAAATAAAAAATCGTTTAATGAATGATCCATGCAAGCAAGCC
Figure 5, 6	mouse_Mecp2_g1	TTAGCTGACTTTACATAGAG	mouse_Mecp2-V5_ssODN	75 bp	GTTTCATCTTCCATGCCAAGGCCAAACAGAGAGGAGCCTGTGGACAGCCGGACGCCCGTGACCGAGAGAGTTAGCGGTAAGCCTATCCCTAACCCTCTCCTCGGTCTCGATTCTACGTGACTTTACATAGAGCGCATTGCAAAGCAAACCAACAAGAATAAAGGCAGCTGTTGTCTCTTCTCCTTATGGGTAGGG
Figure 5, 6	mouse_Mef2a_g1	ATGGGTGACCTAAGGCTTCC	mouse_Mef2a-V5_ssODN	75 bp	CTTGGCCGACCTCCAAATACTGAGGACAGAGAAAGCCCTTCTGTAAAACGCATGAGGATGGACACATGGGTGACCGGTAAGCCTATCCCTAACCCTCTCCTCGGTCTCGATTCTACGTAAGGCTTCCTGCTTCATGTTTGTTCTTTGTGTTACTGCAGTGAACTGCCCTACATATCTTAAATTGGTTTGTAATCA
Figure 5, 6	mouse_Meis2_g1	CATTCATGCCCAATAGTATA	mouse_Meis2-V5_ssODN	75 bp	TCAGCACAGAGCCCCACAATGTTAAATTCTGTAGATCCCAATGTTGGCGGACAGGTTATGGACATTCATGCCCAAGGTAAGCCTATCCCTAACCCTCTCCTCGGTCTCGATTCTACGTAGTATAAGGGAACTCAAGCAAGAAGGAAACACACGCAAAAACTATTTTAAGACTCTCTGAACTTTGACCAGATGTGA
Figure 5, 6	mouse_Met_g1	GGGAACACATGATGAATGAG	mouse_Met-V5_ssODN	75 bp	GAACTGTTGGGGAAGGGATAGTCTGGTTTGGGCCAGAACTGTTTCTTGGAAGTGGGCTGCTGGACCTCTCATTCATCACGTAGAATCGAGACCGAGGAGAGGGTTAGGGATAGGCTTACCTGTGTTCCCCTCGCCATCAATGTTGTCTTGGGATGGCAACAGAGAAGGATATGGAGCAACACATTTTACATTCAC
Figure 5, 6	mouse_Mier2_g1	ACACGTACCCCCAGATGACC	mouse_Mier2-V5_ssODN	75 bp	CAGGAAGACTGACTCGCAGGCCTGGCAGTGTTGCCACGTCCAATCTGAGCACACGTACCCCCAGATGACCAGCGGTCACGTAGAATCGAGACCGAGGAGAGGGTTAGGGATAGGCTTACCACAGGTCATCACATTGCACCTACGGGAAACCATAAGTAAATGTCAGTGGCCAAGTAACCCAGGGCTCGCCCGTCC
Figure 5, 6	mouse_Mllt1_g1	TGCCACTGTGGAGCCACGGT	mouse_Mllt1-V5_ssODN	75 bp	TTCGACTTTGACCTTTTCTCCTTGGATGAAAGCACTGTTCGCAAGCTGCAGAGCTGCCTGGAGGCCGTGGCCACAGGTAAGCCTATCCCTAACCCTCTCCTCGGTCTCGATTCTACGTGACCCCGGCTGCCACTGTGCAGCCACGGTGGCCATGGTGGGCACGGGAGGGGCTGGGCATGAGGGCTGGCCCGCCAT
Figure 5, 6	mouse_Mta1_g1	CTAGGCGGTCACCCACACCG	mouse_Mta1-V5_ssODN	75 bp	CGCCAGAGCCAGGCCCTGCCGCTGCGGCCACCCCCACCTGCACCAGTCAATGATGAGCCCATTGTTATTGAGGACGGTAAGCCTATCCCTAACCCTCTCCTCGGTCTCGATTCTACGTAGGCGGTCACCCACACCGTGCCCTGCCTGGGCCCCTCCATCAGCCCCAGAGTATCCAGTGAGGCCTGCAGAGGCCAA
Figure 5, 6	mouse_Mta2_g1	CTGGAGGATTGAGCATCTTA	mouse_Mta2-V5_ssODN	75 bp	ACAGTGCGGCCCCCAGTTCCTCTGCCCGCTTCTTCACATCCTGCCAGCACCAATGAGCCCATTGTCCTGGAGGATGGTAAGCCTATCCCTAACCCTCTCCTCGGTCTCGATTCTACGTGAGCATCTTAGGGGAAGCGAGGTGGGATGAGAGGTAGAGGGGTGGGTGCCCAGGACATACAAATCTTCATTCCTTTT
Figure 5, 6	mouse_Mycn_g1	GTGGCAGTGACTGTCCGTGT	mouse_Mycn-V5_ssODN	75 bp	CAACACAATGTTTGTTTAAAAAAAAAAAAAAATCAAAATGTGCAAAGTGGCAGTGACTGTGCGTGTGGCAAACGTTTACGTAGAATCGAGACCGAGGAGAGGGTTAGGGATAGGCTTACCGCAAGTCCGAGCGTGTTCGATCTTCTTTAGCAACTGCTGCTGCCTCGCCTGCAGTTTCTCCTTTTCCAGCAGGAG
Figure 5, 6	mouse_Ncoa2_g1	AAGATGCAGACAGTTTCTCC	mouse_Ncoa2-V5_ssODN	75 bp	AGACGCAGCTCTCCAGACTGGTAAATGTTTGTAAGCCCAGTGGCTTGAAGAAAGATGCAGACAGTTTCTCCAGCGTCACGTAGAATCGAGACCGAGGAGAGGGTTAGGGATAGGCTTACCGCAGTATTTCTGAGGGGAAACAGACAGAAAGGTTGTGTGAAGACAAGGGGCTCTTTATGTTTGCATAGTTTTTTC
Figure 5, 6	mouse_Ncor1-A_g1	CTGTGCGTGGGAGAGCGCTC	mouse_Ncor1-A-V5_ssODN	75 bp	CAGAACCGCATCTGGGAGAGGGAGCCTGCCCCGCTCCTCTCAGCGCAGTATGAGACACTGTCTGATAGTGACGACGGTAAGCCTATCCCTAACCCTCTCCTCGGTCTCGATTCTACGTGAGCTGTGCGTGGGAGAGCGCTCTGCCTTTGCTTTTTATTGAAGATTTAAAAAAAAAAAAAGAAAATTATTCTGCCC
Figure 5, 6	mouse_Ncor1-B_g1	TTTTCAGTGGAGTACCTGCA	mouse_Ncor1-B-V5_ssODN	75 bp	TACCTTGAGGCTTGAATTCTTTGCCTCCTGTTTTGTGTTTTTTTCAGTGGAGTACCTGCAAGACGCATGATGAAGGGTAAGCCTATCCCTAACCCTCTCCTCGGTCTCGATTCTACGTAAGATAATGAAGCTTTTTCATTTAAGACTAGTGATGACACCGTCCCCCACCAAGCCACATCTGCCATTGCAAAGTAG
Figure 5, 6	mouse_Ncor2_g1	AGCGAGTGACCACGGATTGG	mouse_Ncor2-V5_ssODN	75 bp	GGTCCCCACCACGCCTGGGATGAGGAGCCCAAGCCACTGCTGTGTTCACAGTATGAGACACTCTCGGACAGCGAGGGTAAGCCTATCCCTAACCCTCTCCTCGGTCTCGATTCTACGTGACCACGGATTGGGGCGGAGCGGTGCCAGGTCCCCGCACAAGCCAGAAGCAGCCCAGCATGGAGCAGACAGCTGCTG
Figure 5, 6	mouse_Nfat5_g1	CACTGTTACAGAATTCTTCA	mouse_Nfat5-V5_ssODN	75 bp	ATAATCTTTATGGAACCACAGTTCTCAGGATATCTTGGAATCACTGTTACAGAATTCTTCATGCAATTTATCTCACTACGTAGAATCGAGACCGAGGAGAGGGTTAGGGATAGGCTTACCAAAGGAGCCGGTTAAATTGTTCCCTTGGCTTTGCAATGAAACAAGCAAATCAATCTTTTCCATGTTCTGACTGCT
Figure 5, 6	mouse_Nfe2l1_g1	AGGACCGGAGGAAGTGAGCC	mouse_Nfe2l1-V5_ssODN	75 bp	GTCCTCCTCATTCCTCGCACGATGGCTGACCAGCAGGCTCGGCGACAGGAGAGAAAGCCAAAGGACCGGAGGAAGGGTAAGCCTATCCCTAACCCTCTCCTCGGTCTCGATTCTACGTGAGCCTGGGGAGGCAGGGGGTGGACGCTCACTAAGACCGAAACTGCAGAAGGGCTGGGCCTGGACCTAACATTGGGG
Figure 5, 6	mouse_Nfe2l2_g1	AAAAACTAGGTTCGGGAGGA	mouse_Nfe2l2-V5_ssODN	75 bp	TACTCTCTGCAGCAAACCAGAGATGGCAATGTGTTCCTTGTTCCCAAAAGCAAGAAGCCAGATACAAAGAAAAACGGTAAGCCTATCCCTAACCCTCTCCTCGGTCTCGATTCTACGTAGGTTCGGGAGGATGCAGCCTTTTCTGAGCTAGTGTTTGTTTTGTACTGCTAAAACTTCCTACTGTGATGTGAAATG
Figure 5, 6	mouse_Nfe2l3_g1	CAGTTTGTGATGCTGGTCAC	mouse_Nfe2l3-V5_ssODN	75 bp	TGAATGATTCAAGTACCAGTACTTTTAAAATCTTAAAATAGTTGGACAGTTTGTGATGCTGCTCACTGCAGCTATTCACGTAGAATCGAGACCGAGGAGAGGGTTAGGGATAGGCTTACCGTTTCTTCTCTCTCTCTTTCCCTTTGGGGCTTCCTTTTTGTGGCCTGATGAGATGAGTTCTTTGGGTACAATCAA
Figure 5, 6	mouse_Nfia_g1	TGGTCTGTCTGGAGGATGGT	mouse_Nfia-V5_ssODN	75 bp	TGAGGTTGCGTCCATGTTACAGAGTTGAGAAGGGGTCAGGTGGTCTGTCTGCAGGATGGTGGCATGCTGCAACTTTTACGTAGAATCGAGACCGAGGAGAGGGTTAGGGATAGGCTTACCTCCCAGGTACCAGGACTGGAAGACAAAAAGAAAAGTCTAATTAAAATGCAGGTGTAGTGCTGGGTGTAGTGGCTC
Figure 5, 6	mouse_Nfib_g1	TCCTGGTACCTGGGCTAGCT	mouse_Nfib-V5_ssODN	75 bp	ATTTTAACATTGTCTTATTTTTTCTTTCTTTCTTTTTTTCTTCCCGTCTCCTCTCAACAGTCCTGGTACCTGGGCGGTAAGCCTATCCCTAACCCTCTCCTCGGTCTCGATTCTACGTAGCTTGGTTCCTTTTCAAGTGTCAAATAGCACACCCATCTTACCGGCAAATGTCCAAAATTATGGTTTGAACATAAT
Figure 5, 6	mouse_Nfic-A_g1	TACCAGGACTGTCCCGCAAG	mouse_Nfic-A-V5_ssODN	75 bp	TGATGAAGGAGGGATGGGAAGGCAACCTCGGCTACCCCAGGTACCAGGACTGTCCCGCAAGAGCATCCCTCCGTCCTACGTAGAATCGAGACCGAGGAGAGGGTTAGGGATAGGCTTACCATCCCACAAAGGGACTGTTTGCAGGGGACGTGTCGGGCGGAGAGCAGGCTGTGGGGAGGAGAGAGACCAGAGCCC
Figure 5, 6	mouse_Nfic-B_g1	TGGGACTCCACCGGTGATGA	mouse_Nfic-B-V5_ssODN	75 bp	CACCAAAAATGCAGGCTGGGACTGTCACCCTGGGACTCCACCGGTGATGAAGCAGGGATGGGAAGGCAACCTCGGCTACGTAGAATCGAGACCGAGGAGAGGGTTAGGGATAGGCTTACCCCCCAGGTACCAGGACTGCATGGTCGGCAGAGAGATGGAGACAGAGAAATTGGGTGTCAGGAAAGCAGCAGTCTC
Figure 5, 6	mouse_Nfix-A_g1	TGATCTTAATCAGAGGAACC	mouse_Nfix-A-V5_ssODN	75 bp	GGAGTTGGGACCTGCCCCAGCTGTTCTCACGGTCGCTTTTTTTTTTTCCTGATCCCATTACAGTCCTGGTTCCTCGGTAAGCCTATCCCTAACCCTCTCCTCGGTCTCGATTCTACGTGATTAAGATCAACAAAGAAACAACTAAATTTAAAAAAGCAAAAAAAAAAAAGAGGTTCCTCAAAATGGGGGAGAAGA
Figure 5, 6	mouse_Nfix-B_g1	ACCAGGACTGAGACTGCTGT	mouse_Nfix-B-V5_ssODN	75 bp	TTTCCTTTTTTAAATTTAGTTGTTTCTTTGTTGATCTTAATCAGAGGAACCAGCACTGAGACTGCTGTGGCATGTTCACGTAGAATCGAGACCGAGGAGAGGGTTAGGGATAGGCTTACCGAAAGTTGCCGTCCCGGGATCCGATGCTGACAAACCGGTTGGCAGAGGAGGCGCCTGTCGTTGTGAATGCTGTGG
Figure 5, 6	mouse_Nkx2-2-A_g1	GAGCGCCGCCCCTCCAAGAC	mouse_Nkx2-2-A-V5_ssODN	75 bp	GCCCAGTACAGCTCGGCCAGCACCCCCCAGTACCCGACAGCACACCCCCTGGTCCAGGCCCAGCAGTGGACTTGGGGTAAGCCTATCCCTAACCCTCTCCTCGGTCTCGATTCTACGTGAGCGCCGCCCCTCCAAGACTGCAGGCCTTAGGCCCTGCCCCCACCCCAGCGGCGCCGGTGGCGAGGAGGACTCGAT
Figure 5, 6	mouse_Nkx2-2-B_g1	GGGTAAAGTCCATTTACAGT	mouse_Nkx2-2-B-V5_ssODN	75 bp	CGACTGACTCAGGCCTGGGAGCACAATCTGGTCATCTGTGGATTTGAGGGATGTCTGGGTAAAGTCCATTTACAGGGTAAGCCTATCCCTAACCCTCTCCTCGGTCTCGATTCTACGTAGGACCACAATGCCAAAGAAAGAATTACAATTCTTTGGCTTGCTGCTTGTCCCTTGGAGTGTGATGAAAAGGTTGAT
Figure 5, 6	mouse_Nkx6-2_g1	CGCCTTGTGAGGACGCGGCC	mouse_Nkx6-2-V5_ssODN	75 bp	CGGCTTCTCAAAAAGCACAAACCCTCGAACTTGGCGCTCGTTAGCCCGTGTGGTGGCAGCGCGGGGGACGCCTTGGGTAAGCCTATCCCTAACCCTCTCCTCGGTCTCGATTCTACGTGAGGACGCGGCCAGCGCGGAGAACCCGAGAACCGGGACTCGCGGCATGCCCCGACGCCAGCCGCCCAGCCGCAGTGT
Figure 5, 6	mouse_Npas3_g1	AACGACGATGCCTCCTGAGT	mouse_Npas3-V5_ssODN	75 bp	CTGACCAGCTCGAATTCAAAGTGCTAGAATGAAAGGTCTAAACGAAAACGACGATGCCTGCTGAGTGGCGCCCGCTCACGTAGAATCGAGACCGAGGAGAGGGTTAGGGATAGGCTTACCGTCCTCCTTGCGCTCCAGAGTCTGTGCCGCGTGGATACCGTTGCTGTAGACTGGGAAGGGCAGCGTGGAGAAGAG
Figure 5, 6	mouse_Nr2c2_g1	TCTAGGAGGCATCCCACTGT	mouse_Nr2c2-V5_ssODN	75 bp	ACTGCTACACTTCCCTTCCCTTGCACCTGCACAGTTCTAGGAGGCATCCCACTGTTGCCAGCTGTTGGTTGTGCACTACGTAGAATCGAGACCGAGGAGAGGGTTAGGGATAGGCTTACCTAGACTGGCTCCAGTGATCTGGCCATTATATTCTGCTGTCTCCATCTTGAGGATGTAAGGAATTATGCTGTCTAT
Figure 5, 6	mouse_Olig1_g1	CTGAGGTCGCGCTCCGCCCC	mouse_Olig1-V5_ssODN	75 bp	CTCTGCCTAGATCCAGGACGCGGGGGCGCGGGAAGATTGGCTGAGCTCGCGCTCCGCCCCGGCCCCAGCCAGCCCTCACGTAGAATCGAGACCGAGGAGAGGGTTAGGGATAGGCTTACCCTTGGAGAACTGGGCCTGCACCGCTGCCAAGCCCAGGCCGGCGGGGACCAGATGCGGGAACTTGCACACCGCACA
Figure 5, 6	mouse_Otx1_g1	GTTCCAGGTCTTGTGAGCCC	mouse_Otx1-V5_ssODN	75 bp	GCCTGGAAACTCAATTTCAACTCTCCCGACTGTCTGGACTATAAGGACCAAGCCTCGTGGCGGTTCCAGGTCTTGGGTAAGCCTATCCCTAACCCTCTCCTCGGTCTCGATTCTACGTGAGCCCAGGAGGGAAAGGAAGTGGAGAAGAAACGCAACTACCTATACCCTCCATGGTCCCCATCCTGTTGCTGCTGC
Figure 5, 6	mouse_Patz1_g1	GGCGTCGGAGAGGTCACCGT	mouse_Patz1-V5_ssODN	75 bp	GAGCCGTTGGCACTCTGTTTCTCTGGCGTCTTCAGGTCGCTGGCGTCGGAGAGGTCAGCGTAGCAGTCGGAGCTCTCACGTAGAATCGAGACCGAGGAGAGGGTTAGGGATAGGCTTACCATCAGATCCTGATGTGAGCATTTCTGGCCTTCTATGGCAAAACAAAAGAGGGCAGAGATGAGGCCAGGCATTAGA
Figure 5, 6	mouse_Pax6_g1	TCGATTACAGTAAAGAGAGA	mouse_Pax6-V5_ssODN	75 bp	TCACCTGGAGTGTCAGTTCCCGTCCAAGTTCCCGGGAGTGAACCTGACATGTCTCAGTACTGGCCTCGATTACAGGGTAAGCCTATCCCTAACCCTCTCCTCGGTCTCGATTCTACGTAAAGAGAGAAGGAGAGAGCATGTGATCGAGAGAGCAAATTGTGTTCACTCTGCCAATGACTATGTGGACACAGCAGT
Figure 5, 6	mouse_Pbrm1_g1	TCACATCACTGTTTCTTCTG	mouse_Pbrm1-V5_ssODN	75 bp	GCCCTCTGGCGCCTACGGGATTTAATGCTTCGAGACACTCTCAACATCCGACAGGCATACAACCTAGAAAATGTTGGTAAGCCTATCCCTAACCCTCTCCTCGGTCTCGATTCTACGTAATCACATCACTGTTTCTTCTGTGCAAGCAAAGAGTTGTGCAGCGGTAGCCATTTTAGTTACTGGGGTGGGAGGGAG
Figure 5, 6	mouse_Pbx1-A_g1	GTCAGCCGGGATGCGATTGC	mouse_Pbx1-A-V5_ssODN	75 bp	TTGGGAGAGAAACCCTCCCTCCTGGCCCTGCCCCAACTGCGGCACAGCGTCAGCCGGGATGCGATTGCTGCGAGATCACGTAGAATCGAGACCGAGGAGAGGGTTAGGGATAGGCTTACCGTTGGAGGTATCAGAGTGAACACTGCCAGGGCCTTCTGTAGGGGAGGTCACTGATGAAGGGGTAGTAGCATCCTG
Figure 5, 6	mouse_Pbx1-B_g1	CAGTCAGATGTACAGTCCGC	mouse_Pbx1-B-V5_ssODN	75 bp	ATTGCCTTTCTGTTGTTGTTCCTCTGTCTAGGTGGATACCCTTCGCCATGTTATCAGCCAGACAGGAGGATACAGGGTAAGCCTATCCCTAACCCTCTCCTCGGTCTCGATTCTACGTGACGGACTCGCAGCCAGTCAGATGTACAGTCCGCAGCGCATCAGTGCTAATGCAGGTTGGCAGGATGCTACTACCCC
Figure 5, 6	mouse_Peg3_g1	CTCACACTGGTTGAGTAACC	mouse_Peg3-V5_ssODN	75 bp	CTCTTTGTGATTTATTAAGGGTCTGGTTCTGGGAAGAAGGTTTGGCTTTGCTCTTCTTTTCTTCAGCCTGCTTACTCACGTAGAATCGAGACCGAGGAGAGGGTTAGGGATAGGCTTACCACCAGTGTGAGAATTCTGGTGTCTGGCAAGGGAGAGGCGGTCGTTGAAGAGTTGCCCGCACACATCACATTTGAA
Figure 5, 6	mouse_Plxna1_g1	CCTGCTGGGTGGGCACTTCC	mouse_Plxna1-V5_ssODN	75 bp	GTGGGCCAAGGGCTGTCTCCTGGGTCCTCTGCTGCCCTCCTGCTCTGCCTCCTGCTGGGTGGCCACTTCCAGCGCTCACGTAGAATCGAGACCGAGGAGAGGGTTAGGGATAGGCTTACCGCTGCTCAGGGCCATTGTGTCCACCACCTGCTCCAGTTTGCTTCGAAGCCGCTGCCTTCGAGCCTGTTCATCTTT
Figure 5, 6	mouse_Plxna2_g1	CATGTCCATAGAGAGCTGAA	mouse_Plxna2-V5_ssODN	75 bp	CAGGATGAACAGGCCCGACGGCAACGACTGGCCTACAAGGTGGAGCATCTCATCAACGCCATGTCCATAGAGAGCGGTAAGCCTATCCCTAACCCTCTCCTCGGTCTCGATTCTACGTGAAAGGAAGACATCTTGTTCTTGCAAGAGAGACTCATATAAGCTATCACACTGGCTTCTCAAAAGGAAAGATGGGAT
Figure 5, 6	mouse_Plxnb1_g1	GTCACGGATCTATAAGGACC	mouse_Plxnb1-V5_ssODN	75 bp	TGGTGGCCTCTCCCTTGAGATTCCAGGGCTGCCCAGGAGGTACAGAGACAACAGCAGGCAAAGACTCCCTGCTCCTTACGTAGAATCGAGACCGAGGAGAGGGTTAGGGATAGGCTTACCTAGATCCGTGACCTTGTTTTCCACAGCAGCGGCGATCTGCTGGAGCCGGTAGCCCAGCTGCATCTTCTGGGCAGT
Figure 5, 6	mouse_Plxnb2_g1	CTGACCGTCAATGCCGCCTC	mouse_Plxnb2-V5_ssODN	75 bp	GCAGCCCAAAAGATGCAACTGGCCTTCCGCCTACAGCAGATTGCTGCTGCGCTTGAGAATAAGGTTACAGACCTCGGTAAGCCTATCCCTAACCCTCTCCTCGGTCTCGATTCTACGTGACCGTCAATGCCGCCTCAGCATGCAGCTGTGTGGTACCATGGCCTTGGGCAGCCCGTTGGCCTGAGATGGCACTGG
Figure 5, 6	mouse_Pogk_g1	GAGGGTGACTGAGAGGACTC	mouse_Pogk-V5_ssODN	75 bp	ACGGTAAGTGCTAGCCATGAGCAGGGCACCAGTGATGGTGCAGCATCTTTGACTGACCAGTTTACCTGAGTCCTCTCACGTAGAATCGAGACCGAGGAGAGGGTTAGGGATAGGCTTACCGTCACCCTCAGCCACACTTTCAGGACCACATTCTTTTGGCGGTTCTTTGGGCAACTCGCCCTCGATTTCCCAGAG
Figure 5, 6	mouse_Pogz_g1	GCTATGGAAGCTATGGAGTC	mouse_Pogz-V5_ssODN	75 bp	CAGCTTTTTGAGGGGGAAAGTGAGACGGAGTCTTTCTATGGCTTTGAGGAAGCTGACCTTGATCTGATGGAGATCGGTAAGCCTATCCCTAACCCTCTCCTCGGTCTCGATTCTACGTAGGTGCTGAGGCTATGGAAGCTATGCAGTCAGCAAGGAAGGTGAGGGAGGTTAGAGGGGCTTAGACAAGATGGGTAC
Figure 5, 6	mouse_Pou2f1_g1	GTGCAGAGCTGGGTTGCCAC	mouse_Pou2f1-V5_ssODN	75 bp	ATCCAGAGCTCTCTGTTCACAGTCGCCTCTGCCAGTGGGCCTGCTTCCACCACCACAGCTGCCTCCAAGGCACAGGGTAAGCCTATCCCTAACCCTCTCCTCGGTCTCGATTCTACGTGAGCTGAGTGCAGAGCTGCGTTGCCACAGCCTTTCCTCACTACAGGGTGATAGGCTGGCTACCAGCTGCTTAAGAAA
Figure 5, 6	mouse_Pou3f1_g1	CGGCGGGGAACCCAGTCCGC	mouse_Pou3f1-V5_ssODN	75 bp	AAAAGAGTCCAGGCCGCGCGCGCTAACTGCGCGCCGGAGGCACCGCTGCGCCGGCGGGCAACCCAGTCCGCAGCGTCACGTAGAATCGAGACCGAGGAGAGGGTTAGGGATAGGCTTACCCTGCACAGAGCCGGGCAGTGTGTGGTGGTGGTGGTGGTGCAGCGCGGCCGGCGGGGGTGGCGGGGGCGCAGAAGG
Figure 5, 6	mouse_Pou3f2_g1	CGTCCAGTGAACTCAAGCGG	mouse_Pou3f2-V5_ssODN	75 bp	CTGCCGGGCGCCGAGGATGTGTATGGGGGTAGTAGGGACACGCCACCACACCACGGGGTGCAGACGCCCGTCCAGGGTAAGCCTATCCCTAACCCTCTCCTCGGTCTCGATTCTACGTGAACTCAAGCGGGGCAGCGGCAGAGCTTGGGGCTCCCCTCCCCTTTGGTCCACAGTCTTTCCTGGGACCTCTGTTTT
Figure 5, 6	mouse_Pou3f3_g1	TGCCGGGGCGCAGCGCGAAG	mouse_Pou3f3-V5_ssODN	75 bp	GATGTCTACTCGCAGGTGGGTACCGTGAGCGCTGACACACCGCCACCGCACCACGGGCTTCAGACCAGCGTGCAGGGTAAGCCTATCCCTAACCCTCTCCTCGGTCTCGATTCTACGTGAATGCCGGGGCGCAGCGCGAAGAGCGCCGCCGCCGCCGCCGCCACCTCCGCAGCCGCTGTCAGCACCGCCATGGTC
Figure 5, 6	mouse_Prdm2_g1	GGTCACTTCAGGTGCTGTTA	mouse_Prdm2-V5_ssODN	75 bp	AGGGCAGACTGCTGGTCCCTTTGGCTTCACTGATTCCAGGTCACTTCAGCTGCTGTTAAGCAGCAGACAAAGTGCCTACGTAGAATCGAGACCGAGGAGAGGGTTAGGGATAGGCTTACCCTCTTTGAAGAAGGGTCCCTGGAACTGAGTTGCTGCTGCAGCCTTGACCTTTCTGCATTGTCTGGTGATATAAGG
Figure 5, 6	mouse_Prkrir_g1	AGCCATTTTTAAAATCTTCT	mouse_Prkrir-V5_ssODN	75 bp	GTGGACACATACATCAAACTCTATACAAATAAGTCAGAGCTTCCTACAATTAATTCAGAAACCATTGAAAATACCGGTAAGCCTATCCCTAACCCTCTCCTCGGTCTCGATTCTACGTAGAAGATTTTAAAAATGCCTGTTATCTTATTTTGCTGTTTGGAAGAAAAGCTGTAAGGTATAGTAGGCCAGATAATG
Figure 5, 6	mouse_Rbm5_g1	GGGGAAGCAATGCTGAGCAC	mouse_Rbm5-V5_ssODN	75 bp	TATGGGTTGTCAGGTGCCGATTCCTACAAAGATGCTGTTCGGAAAGCCATGTTTGCCCGGTTCACTGAGATGGAGGGTAAGCCTATCCCTAACCCTCTCCTCGGTCTCGATTCTACGTGAAACTGGGGAAGCAATGCTGAGCACAGCGAGCAAGCCATCTCCTCAGTTGCTCTTACTGCCTGTCTCTAAGGGCAT
Figure 5, 6	mouse_Rc3h1_g1	AAGCAGGTGCCCATATTCTA	mouse_Rc3h1-V5_ssODN	75 bp	AGAAGTTATCCATTTTTCTATCCCTATGCCCCATGAACTGATTAGGAGCAGAAGCTAGAAGCAGGTGCCCATATTCTACGTAGAATCGAGACCGAGGAGAGGGTTAGGGATAGGCTTACCGGGAGCAGAATTGGAAACAACTCCTGATCTCTGGGAATCATTGTTATCTCCTCCTCCCTCAGAGTCTTCTGACAG
Figure 5, 6	mouse_Rc3h2_g1	GATGGTTAACAGCTGAAAGG	mouse_Rc3h2-V5_ssODN	75 bp	CTGAAAACTCACGTTATGTCTGAAGATAAAAACGACTTTTTAAAACCTATTGCAAATGGGAAGATGGTTAACAGCGGTAAGCCTATCCCTAACCCTCTCCTCGGTCTCGATTCTACGTGAAAGGAGGCTCAGCTTTCAAATCTGTGACCACACCATGCAAGCATTTACACTAGCTTTTTATATATATAATATATA
Figure 5, 6	mouse_Repin1_g1	CTAGGCCTACGGCCCCTCTC	mouse_Repin1-V5_ssODN	75 bp	AGGTACCCCACCCGGACCACTGACACCCTGTTGCCAAGGATATCCAGGCCTGTCTTCCTAGGCCTACGCCCCCTCTCACGTAGAATCGAGACCGAGGAGAGGGTTAGGGATAGGCTTACCGGCATCATGCTTCTTCTGGTGCATCAAGAGTCGGTCCTCGTCATCAAAGGTCTGGCCACAGATGGCACAACAGAA
Figure 5, 6	mouse_Rere_g1	TTATTTGTTAATGCTGGCTG	mouse_Rere-V5_ssODN	75 bp	GCATGTCCTGATGTCCATTCTTCTGTTTTCTCGTTTCTCACCAGTCGACTGAAGAAAGAAGGTGACAAGCAGTTAGGTAAGCCTATCCCTAACCCTCTCCTCGGTCTCGATTCTACGTAAGTTATTTATTTGTTAATGCTGCCTGTGCAAACCCCAGTTCTAGGGGGCAGAAACAGGACATTTACATCTAGTAGG
Figure 5, 6	mouse_Rest_g1	TCTGCACGGTGCTTCTGCCG	mouse_Rest-V5_ssODN	75 bp	AAGCAAGCTTGCGTTTGTCTACAAATTAAAATTGCATGCTCACAAAGTCTGCACGCTGCTTCTGCCGAGCCTCAGCTACGTAGAATCGAGACCGAGGAGAGGGTTAGGGATAGGCTTACCCTCCTGCTCCTCCCGCTCCTCCTGCTCCTCCTGCTCCTCAGCTGCTTCTTCTAGGAAGTACACATTCACCAAGTG
Figure 5, 6	mouse_Rfx3_g1	CTACACTGCAGTCTAACAGC	mouse_Rfx3-V5_ssODN	75 bp	AGGCTTGTTAAAATTTCAGCTTAAGCCCAGTATCAATGGGGTTAGAGTAAGCTGCAAAACTCTGCTTTCCTGCTGTTACGTAGAATCGAGACCGAGGAGAGGGTTAGGGATAGGCTTACCGACTGCAGTGTAGGTGTTGCCTGTGGCGCTGCACTGCCTGATGGTCTGTGTACTTGTGACGATGTGCTCGCTGTG
Figure 5, 6	mouse_Sall1_g1	ACCTCGGGCGACATTCTGAG	mouse_Sall1-V5_ssODN	75 bp	CCAGAAGGTAAAGGGCGGGGGGAGGGGCAGGAGGCAACCTCGGGCGACATTCTGAGAGCAAGCACTCTGCCAGCTTTACGTAGAATCGAGACCGAGGAGAGGGTTAGGGATAGGCTTACCGCTTGTGACGATCTCTTTGCTGTCCTCCACGAAGCGGGTGAAACGGAAGTTGGTTCCGTTCTCGCTGCTCGCCAT
Figure 5, 6	mouse_Sall2_g1	TCTCTGAGTCATAGAGGACC	mouse_Sall2-V5_ssODN	75 bp	ATCTTGGAGGTTCCTCTATGAAGCTCTCAGGTTTCTGCTCTCTGAGTCATAGAGGACCAGCTACAGAAAGCAGCCTCACGTAGAATCGAGACCGAGGAGAGGGTTAGGGATAGGCTTACCTGGCATGGTGGGGTCATCTTTTCGAGGGAATGGGGAGAGCCCTGGAGAAGGGATGGAGGAGGAACAGCCAGGGAC
Figure 5, 6	mouse_Satb1_g1	GTTAGGAAATACCGGTGGTG	mouse_Satb1-V5_ssODN	75 bp	TCTGAGTGAACACAAGGTGGACTTCTCATGTTGTTAGGAAATACCGGTGGTGTGCCTGAAAAGAATACTGTTCTCTCACGTAGAATCGAGACCGAGGAGAGGGTTAGGGATAGGCTTACCGTCTTTCAAGTCGGCATTAACGTCTGTGCTCCCTTCCACCGACAGCTCTTCCTCTAGTTTCACTGAGAAAAGGGT
Figure 5, 6	mouse_Setdb1_g1	GTTCAAGCGTTCTCAAAGTG	mouse_Setdb1-V5_ssODN	75 bp	AGTTCAACAGTCAGGAAGACCCAGTTCCTGGGGAAAAGGATAGTTCAAGCGTTCTCAAAGTGAGCAAGTCTTCCTCTACGTAGAATCGAGACCGAGGAGAGGGTTAGGGATAGGCTTACCAAGAAGTCTCCCTCTGCATTCAATGGCCCCACAGCAGCACAGCAGCTCCTTGCCTTCCACACTGCCCACTTCGTA
Figure 5, 6	mouse_Ski_g1	CGCACGCATAGGGGTCCACG	mouse_Ski-V5_ssODN	75 bp	GCCTGCAAAGCCACATACCCGCTGCCCTCTGCGCACGCATAGGGGTCCACGTGCCAGTGGCAATCACTGCCCAGCCTACGTAGAATCGAGACCGAGGAGAGGGTTAGGGATAGGCTTACCGGGACCCAGCTCAGCGTTGCTCTCACCTCCAGGATGCTCAGGCCGTGGCCGAGGCCGCAGCTGCTCCTGAAGCTC
Figure 5, 6	mouse_Smad4_g1	GGAAATGGTTAGGGCGTCCG	mouse_Smad4-V5_ssODN	75 bp	CTTCAGATTATAAACACGAGTATATTTCATAGTCCACCATCCTGCAAATGGTTAGGGCGTCCGTGCTGTGAGATCTCACGTAGAATCGAGACCGAGGAGAGGGTTAGGGATAGGCTTACCGTCTAAAGGCTGTGGGTCCGCAATGGGCATGGTGTGCAGGACTTCATCCAAGAGCTGCAGAGCTCGGTGAAGGTG
Figure 5, 6	mouse_Smad5_g1	TCTTTCAACTATATTTTTAG	mouse_Smad5-V5_ssODN	75 bp	CACGGGCCTCTGCAGTGGCTGGATAAAGTCCTTACTCAGATGGGCTCTCCGCTGAACCCCATTTCTTCTGTTTCAGGTAAGCCTATCCCTAACCCTCTCCTCGGTCTCGATTCTACGTAGTGCAGAAGTATTCTTTCAACTATATTTTTAGTGCACTTGTTTTAATTTTAGAGGAATTTCCAGTACAGATGCTGT
Figure 5, 6	mouse_Smarca5_g1	TTTGTCTTATAATCACTAAC	mouse_Smarca5-V5_ssODN	75 bp	GTTTGTTTATAGACACAGAAACGTAAGATGGACGGTGCCCCTGATGGCCGTGGAAGAAAAAAGAAGCTGAAACTAGGTAAGCCTATCCCTAACCCTCTCCTCGGTCTCGATTCTACGTGAATGCATTTTTGTCTTATAATCACTAACTGCTAGTTCTTTAATTTACGGGTCTTCATAAGATGTGCTGTACAGTGC
Figure 5, 6	mouse_Smarcc1_g1	TGGAGGCTCTTGTATCTTCC	mouse_Smarcc1-V5_ssODN	75 bp	AAGGAAGCCGAGACACAAGTCCTGCCATCCCCATTCCTGCTTGTGCTGGCTGTGGAGGCTCTTGTATCTTCCAGCCTACGTAGAATCGAGACCGAGGAGAGGGTTAGGGATAGGCTTACCGGGAGTGGCCGAGGCGGGTGGGCCTGGAGCAGGAGGTGGAGGGACCCCATCTGCAGGAGGAGGCGGCTGCTGCTG
Figure 5, 6	mouse_Smarcc2_g1	GAGGGGGAGAGATGGCTGGC	mouse_Smarcc2-V5_ssODN	75 bp	CAGTAGTGGGGGAGGGCTGTTCCTGGAACTGTGATCTCCATGGGGAGTGAGCGGGAGAGATGGCTGGCTGCTTCCTCACGTAGAATCGAGACCGAGGAGAGGGTTAGGGATAGGCTTACCCTGTGGAGGTGGCACAGGGGTGACTGTGCCTGGGCTTGGAGCTGTGGGGTCTGGAGGCAGCGGGGTGCCTGGGTC
Figure 5, 6	mouse_Sp1_g1	GGTATTGGCCCATATGTCTC	mouse_Sp1-V5_ssODN	75 bp	CTTGGACCCATGCTACCTTGCATCCCGGGCTTAGTGGGTATTGGCCCATATGTCTCTGCCACTGCGTGTCTAATCTTACGTAGAATCGAGACCGAGGAGAGGGTTAGGGATAGGCTTACCGAAACCATTGCCACTGATATTAATGGACTGCAGCTCTGTCACCTGCATGACGTTGATGCCACTGTTGGCAAGACG
Figure 5, 6	mouse_Sp3_g1	ACACAAATACTTATTCATTG	mouse_Sp3-V5_ssODN	75 bp	AGCAATCAAGACATCCTTACCAACACTGAAATACCTTTACAGCTTGTCACAGTTTCTGGAAATGAGACAATGGAGGGTAAGCCTATCCCTAACCCTCTCCTCGGTCTCGATTCTACGTAAATATTACACAAATACTTATTCATTGTGCTTATTTTTATACAGTAGTGAGAAGAATATTGTTCCTAAGTTCTTAGA
Figure 5, 6	mouse_Srebf1_g1	GTCCTCAAGGGAAAGCTTTG	mouse_Srebf1-V5_ssODN	75 bp	CCTGATTGCTTGTCAGGCTCACCCTCTGGAAGACCACAGCCAATGACAAAGGTCCTCAAGGCAAAGCTTTGGGCTCTACGTAGAATCGAGACCGAGGAGAGGGTTAGGGATAGGCTTACCGCTGGAAGTGACGGTGGTTCCGCCGCCCAGGCGCAGGAGCATCTGCTGGCAGTCCAGCAGTAGCCGGTGATCGCC
Figure 5, 6	mouse_Srebf2_g1	GCTGCCTCCTGACCACCGTC	mouse_Srebf2-V5_ssODN	75 bp	GGTGACCGCCGTTCCTGCAGTGACTGCCAGCAGATGATTGTCAAGCTGGGCGGTGGCACTGCCATCGCTGCCTCCGGTAAGCCTATCCCTAACCCTCTCCTCGGTCTCGATTCTACGTGACCACCGTCTGGGGCCTGCTCCACTTCTTTCCACCTTTTTGTCTCTTTCTCCCAGGATCTTCCCTCTGTCTCCCAG
Figure 5, 6	mouse_Srf_g1	GAATGATCCGCCCGTCACCC	mouse_Srf-V5_ssODN	75 bp	CAAGCTGGGAGCAGCAGCAACCTCACCGAGCTACAGGTGGTGAACCTGGATGCCACCCACAGCACCAAGAGTGAAGGTAAGCCTATCCCTAACCCTCTCCTCGGTCTCGATTCTACGTGATCCGCCCGTCACCCTGCACAGACGGCCCAAGGCACGGCACCACTTATTTATTGTTGCCTTTTCACGGTTTCTTTA
Figure 5, 6	mouse_Ssh2_g1	TCTTAGAAAATCACGTGTGT	mouse_Ssh2-V5_ssODN	75 bp	AGTGCATGTTCCTTACATATTACACCACCTTTTTAACAAACATTTTCTTAGAAAATCACGTGTGTGGCCTCAGCATCACGTAGAATCGAGACCGAGGAGAGGGTTAGGGATAGGCTTACCCATGGTGTTATAGAAGGGGTTGGTTGTCCGTTTTTTATCATTTGCTCTTTTCAGTCTTCTAAGGGGGTGAGTTCT
Figure 5, 6	mouse_Ssrp1_g1	GACTGGAGCTGTGACGAGGT	mouse_Ssrp1-V5_ssODN	75 bp	GCAGTTACTCAGATGGCACAGAATCCAAGGACTATGTGAGAGACTGGAGCTGTGACGAGCTGGCAATTCCCTCCTTTACGTAGAATCGAGACCGAGGAGAGGGTTAGGGATAGGCTTACCTTCATCAGATCCCGAGGCAGAGTCCTCTGAGCTTGGAGGGGTACTGGCTAGCTCCTCTTCAGAGTCCTGAAAAGC
Figure 5, 6	mouse_Stat3-A_g1	AGTCACGTCTCTGCAGCTTC	mouse_Stat3-A-V5_ssODN	75 bp	GGGTTCGGCTGCTTAGGGGTGGAGCACGGGGCAGGTGTCTCAAGTCACGTCTCTGCAGCTTCTGCTTTCAGCTCCTCACGTAGAATCGAGACCGAGGAGAGGGTTAGGGATAGGCTTACCCATGGGGGAGGTAGCACACTCCGAGGTCAGATCCATGTCAAACGTGAGCGACTCTGCAGAGACACACAGAGAGTG
Figure 5, 6	mouse_Stat3-B_g1	CAGTTTGGAAATAACGGTGA	mouse_Stat3-B-V5_ssODN	75 bp	CAGAACGACCTGCAGCAATACCATTGACCTGCCGATGTCCCCCCGCACTTTAGATTCATTGATGCAGTTTGGAAAGGTAAGCCTATCCCTAACCCTCTCCTCGGTCTCGATTCTACGTAACGGTGAAGGTGCTGAGCCCTCAGCAGCAGGGCAGTTTGAGTCGCTCACGTTTGACATGGATCTGACCTCGGAGTG
Figure 5, 6	mouse_Tcf12_g1	ATTTAGCCTACTGATGACTC	mouse_Tcf12-V5_ssODN	75 bp	TCTGAGTTGTCCAAATCTTATGAGGAGAGGTCACCTTCTATTTAGCCTACTGATGACTCTGCAACTGCCTGATGTTTACGTAGAATCGAGACCGAGGAGAGGGTTAGGGATAGGCTTACCCAGATGACCCATAGGGTTGGTAGACTCACTAAGCCCAGGATGGGCTCCTGGCAACGTGTTGGGCGGCTCTGCTGA
Figure 5, 6	mouse_Tcf3_g1	AGCCGTCACAGCTTCTTCGT	mouse_Tcf3-V5_ssODN	75 bp	GTCGGGGACCCACAGCTGGCCCTGTCAGCCGCCCACCCGGGCCTGGGTGAGGCCCACAACCCAGCCGGGCACCTGGGTAAGCCTATCCCTAACCCTCTCCTCGGTCTCGATTCTACGTGAGCCGTCACAGCTTCTTCGTTGCACCAGCGACCACCATATCTCTGCCCGGGGTGCATCAGGACGGTTCTGGATGAG
Figure 5, 6	mouse_Tcf4_g1	GGAGACGCAGCGAATCACAT	mouse_Tcf4-V5_ssODN	75 bp	TCAGAGCCTCCCCCACTCTCCTTGGCTGGCCCACACCCTGGGATGGGAGACGCAGCGAATCACATGGCACAGATGGGTAAGCCTATCCCTAACCCTCTCCTCGGTCTCGATTCTACGTGAAAAGGTCCAAGTTGCTACCTTGCTTCATTAAACAAGAGACCACTTCCTTAACAGCTGTATTACCCTAAACCCACA
Figure 5, 6	mouse_Tcf7l2_g1	ATACAAGCAGTCTTTGAATT	mouse_Tcf7l2-V5_ssODN	75 bp	CAACCCCTTTCCTTTTCTTTTAATGACCACCTTTGGTTAAATTTGTTGTTTCTTTGTTCTGATACAAGCAGTCTTGGTAAGCCTATCCCTAACCCTCTCCTCGGTCTCGATTCTACGTGAATTTGGAATATTATGATGCAGAAAAAAAAAGTGCGTTCGCTACATACAAGGTGAAGGCAGCTGCCTCAGCCCACC
Figure 5, 6	mouse_Tead1_g1	ATCTCTCTATATAAATAACC	mouse_Tead1-V5_ssODN	75 bp	GTTCGATAATGGAGAGTGTGTGTGTGCACATATGTGTGTGTATATACAGATATCTCTCTATATAAATAACCAGCTTCACGTAGAATCGAGACCGAGGAGAGGGTTAGGGATAGGCTTACCGTCCTTCACAAGCCTGTAGATATGGTGCTGTGCTCCGTGTTCGCTATTCGAGACTTCAAATACACAGGCCATGCA
Figure 5, 6	mouse_Tead2_g1	ACTGATGGAGCCCCCGCCGC	mouse_Tead2-V5_ssODN	75 bp	TGTACTGCCTACGTCTTTGAAGTCTCCACCAGTGAACGAGGAGCCCAGTACCACATCTACCGCCTGGTCAGGGACGGTAAGCCTATCCCTAACCCTCTCCTCGGTCTCGATTCTACGTGATGGAGCCCCCGCCGCTGCTGTTTTTCACAACACCCCCTTCCTGGGAAGGGCCCTTTTGCTCTCTCTGTAAGAGAG
Figure 5, 6	mouse_Terf1_g1	CTGATTAGCTGAGACACTGG	mouse_Terf1-V5_ssODN	75 bp	TATAAGTTCAACAACCGAACAAGTGTCATGTTAAAAGATAGATGGAGAACAATGAAGAGACTGAAACTGATTAGCGGTAAGCCTATCCCTAACCCTCTCCTCGGTCTCGATTCTACGTGAGACACTGGAGCCTGGATGGGTTTGATTCAGCTTAATACAAGCATAAATACTTGGATCACTACACTTTGTTTACAA
Figure 5, 6	mouse_Trp53_g1	GTGATGGGGACGGGATGCAG	mouse_Trp53-V5_ssODN	75 bp	TTGTGTCTCAGCCCTGAAGTCATAAGACAGCAAGGAGAGGGGGAGCCTGGTGATGGGGACGGGATGCAGAGCCAGTCACGTAGAATCGAGACCGAGGAGAGGGTTAGGGATAGGCTTACCGTCTGAGTCAGGCCCCACTTTCTTGACCATTGTTTTTTTATGGCGGGAAGTAGACTGGCCCTTCTTGGTCTTCAG
Figure 5, 6	mouse_Trps1_g1	TTTAATTGTGCTAAGTGCTA	mouse_Trps1-V5_ssODN	75 bp	TCATAAGACATTACAAGCTATTGAATTCCCATCAAGAAAACCTATTTCTATTTAATTGTGCTAAGTGCTAAGCTTTTACGTAGAATCGAGACCGAGGAGAGGGTTAGGGATAGGCTTACCCTCTTTAGGTTTTCCATTTTTTTCTGCTTGTGCATTGTTCCTATGCAGGCCCCTCTGGATATGTGTTGTGAAGTC
Figure 5, 6	mouse_Tsc22d1_g1	GATCAACCGCATAGCCTCCT	mouse_Tsc22d1-V5_ssODN	75 bp	CCGGCCACCACGCAGCCACAGGGGACCACACAGCCCCCTGCACAGCCAGCATCCCAGGGCTCAGGATCAACCGCAGGTAAGCCTATCCCTAACCCTCTCCTCGGTCTCGATTCTACGTAGCCTCCTAGGCCCCAACAGAACTGCCTGCTGCTGCTGCTGTCTGAACTGAACAGACCGAAGAGATGTGCTAGAGAG
Figure 5, 6	mouse_Tsc22d2_g1	AGCTTTCTTAAGCCTCGTTA	mouse_Tsc22d2-V5_ssODN	75 bp	TCTCAACAACAAGCAATGATAGCACAGCCTCCTCAGCCAACGCAACCTCCACAGCAGCCGAATGTCTCCTCAGCAGGTAAGCCTATCCCTAACCCTCTCCTCGGTCTCGATTCTACGTAAAGCTTTCTTAAGCCTCGTTAAGCAAAAACTGAAAGCAATCTTTCCTTGTGTGCCACTGCTGTTCTTTCCACTTTA
Figure 5, 6	mouse_Tshz2_g1	GGCTTTCAGTCTCGTGTTGG	mouse_Tshz2-V5_ssODN	75 bp	AACCCGCAGCATCCTGGTCCATCCACCGCAGCCTGGCTTTCAGTCTCGTGTTGCAGCCTGTAGAACTCTGCAGAACTACGTAGAATCGAGACCGAGGAGAGGGTTAGGGATAGGCTTACCTTCTTCATCCACGTCTGCTACAAACTGAGAGTGGTGTTCGGGTGACTTGCTGTGCGTTTTGCTTAGGTGGAGTTT
Figure 5, 6	mouse_Ubtf_g1	TCGGATTCTGACTCCAACTG	mouse_Ubtf-V5_ssODN	75 bp	GATGAAGACAACGAGTCTGAGGGCAGTAGCTCCAGCTCTTCATCCTCAGGGGACTCTTCGGATTCTGACTCCAACGGTAAGCCTATCCCTAACCCTCTCCTCGGTCTCGATTCTACGTGAGGCTCAGCCTCCACCCCAGGCAGGCAGCCAGGCAGGCAGCCAAGGAGAGAGCCCCTGCAGAGCTCATCTCCCCAA
Figure 5, 6	mouse_Uncx_g1	CTAAGCGCATCTTCCAGCCG	mouse_Uncx-V5_ssODN	75 bp	CTGATTCGTTGGGAGTCTGGGGCTGAGTGAGTGGGCTCGACTGGCTAAGCGCATCTTCCAGGCGCGCTCCCCAGCTCACGTAGAATCGAGACCGAGGAGAGGGTTAGGGATAGGCTTACCGTCCATGTCCACCTCCTCGCCCTCGGGAGGGCTGGGTCCCGTAGCAGCGCCCGGCTCAGCGGCGCCGCAAGTGGC
Figure 5, 6	mouse_Whsc1_g1	CACAGATGGCAAATAGCGCT	mouse_Whsc1-V5_ssODN	75 bp	CCCTTTCCAGAATCACTGAAGTCAAAAGGAAAGAGGAAGAAAAGGCGGTGCTGGCGAAGGGTCACAGATGGCAAAGGTAAGCCTATCCCTAACCCTCTCCTCGGTCTCGATTCTACGTAGCGCTTGGTCAGATCCTGGCGTGGTGTGGGGCAGCCAGCCCTGCAGACAGTGGGAAGGCAAGCACGGCACCCACCC
Figure 5, 6	mouse_Wiz_g1	AGGTGGCACAAAAGGGGATC	mouse_Wiz-V5_ssODN	75 bp	ATGGAAAAGGGGGAGAGGACAGAGGAGAAATGGGAGGGGATAGGTGGCACAAAAGGCGATCTGCAATGCTGTGTGTTACGTAGAATCGAGACCGAGGAGAGGGTTAGGGATAGGCTTACCGGGTGCCTCTACAGCTGCTGTCTGTGCCTGCGGGGCCTGGGGCTCCTCAGGCGGAGGGTCTGCTTTGGAGAAGTT
Figure 5, 6	mouse_Ybx1_g1	GGGCGGGGCTGAGTAAATGC	mouse_Ybx1-V5_ssODN	75 bp	GGCAAAGAGACAAAAGCAGCCGATCCACCAGCTGAGAATTCGTCCGCTCCCGAGGCTGAGCAGGGCGGGGCTGAGGGTAAGCCTATCCCTAACCCTCTCCTCGGTCTCGATTCTACGTAAATGCCGGCTTACCATCTCTACCATCATCCGGTTTGGTCATCCAACAAGAAGAAATGAATATGAAATTCCAGCAAT
Figure 5, 6	mouse_Ybx3_g1	TGCTGGTGGTTACGGTGCCT	mouse_Ybx3-V5_ssODN	75 bp	TTTTTGCCTTGTTTTTGAATGGTCATTAATTCTTTAGGTCACCCTGCTGGTGGTTACGGTGCCTGGCAGCCAGGGTCACGTAGAATCGAGACCGAGGAGAGGGTTAGGGATAGGCTTACCCTCGGCACTGCTCTGTTCGGTAGCTGGAGCGGGGTTCTCAGTTGGTGCTTCACCTGCCTTGGTCTGAAACAGAGC
Figure 5, 6	mouse_Yeats2_g1	AGATCCCTGAAAAGCGGGAG	mouse_Yeats2-V5_ssODN	75 bp	CATCAGGCCATTTGCAACATTCCTTTTCTGGATTTTCTTACAAACAAACACATGGGGAGACTGAATGAGGATCAGGGTAAGCCTATCCCTAACCCTCTCCTCGGTCTCGATTCTACGTGAATACAGCGAAGAGATCCCTGAAAAGCGGCAGAGCCTGTGTCTGCAGTGTGCAGACTGTGACCCTCGTGTTTGAGG
Figure 5, 6	mouse_Yeats4_g1	TTGAGCAACTGGCGGTAAGT	mouse_Yeats4-V5_ssODN	75 bp	GCAAGTCGTGAAACTATAAACTGTTTAAAAAATGAAATCAGGAAGCTTGAAGAAGACGATCAGACGAAAGACATTGGTAAGCCTATCCCTAACCCTCTCCTCGGTCTCGATTCTACGTGAGCAACTGGCGGTAAGTCGCCTGCAGAGCCGGGCCGCCGCGGAGGGACTTGCCACAGACGCTGCGGTGTTTCTGGG
Figure 5, 6	mouse_Zbtb1_g1	CTACTGTACAGATGTTTAGT	mouse_Zbtb1-V5_ssODN	75 bp	GGAATATGTGGAGCAAAGTTTAATTTGAGGAAGGATATGAGATCGCATTATAATGCCAAGCATTTGAAAAGAACCGGTAAGCCTATCCCTAACCCTCTCCTCGGTCTCGATTCTACGTGATGGGTTTCTACTGTACAGATGTTTAGTTGCTAGCCAGAACACCAAAGCAAAAAGGCTATGAGCTATTTAGAACTG
Figure 5, 6	mouse_Zbtb39_g1	GAAGAACCCGGACAGCTGAC	mouse_Zbtb39-V5_ssODN	75 bp	CCCCCTGACTTCACCATCGAGCAGACCTTCATGTACATTATACATTCCAAAGAGGCTGAGAAGAACCCGGACAGCGGTAAGCCTATCCCTAACCCTCTCCTCGGTCTCGATTCTACGTGACTGGGTCCCAGCAGAGTCAGAGGGAGCTCCCAGCTGGCAGCCGGGATAGTGACTTTGTAAAGGCCGTTGGTCCTC
Figure 5, 6	mouse_Zc3h11a_g1	AAGTGTCCTCATTATCCCCT	mouse_Zc3h11a-V5_ssODN	75 bp	GAAACTAAGTCCAGTTTTTGGTGAGGGTTTTTTTTTTTTTTTTTTTTTTAAGTGTCCTCATTATCCCCTTGCGTTTCACGTAGAATCGAGACCGAGGAGAGGGTTAGGGATAGGCTTACCGCTGTCAATCATCTCTGAGAGCTCAAGCAGAAGGTCATCTTCATCCTTCCCAGGATCCAAGTCGATCTCAGCTTC
Figure 5, 6	mouse_Zc3h18_g1	GTAGTGGCCCAGCTCACTCC	mouse_Zc3h18-V5_ssODN	75 bp	GAGGAGCTCCTTAAACAGCTCAAAGCGGTTGAGGACGCCATCGCTCGCAAGCGGGCCAAGATCCCCGGGAAAGTGGGTAAGCCTATCCCTAACCCTCTCCTCGGTCTCGATTCTACGTAGTGGGCCAGCTCACTCCTGCAGTAGACTCTTCATGTTTTTATAAAGAGTAGGGTAAGCGCAGCCATTTTGGATTTT
Figure 5, 6	mouse_Zc3h4_g1	CCTTCTGCCAGTAGTGTCAC	mouse_Zc3h4-V5_ssODN	75 bp	GAGGGTGAGCAGGATGCAGGATCCCTGAAGGACGTTTTTAAAGGCTTTGACCCCACAGCCTCCCCCTTCTGCCAGGGTAAGCCTATCCCTAACCCTCTCCTCGGTCTCGATTCTACGTAGTGTCACTGGGGGCCAGTGCTCCCTCCACTCCACCACCCTCCCAGGGTGACATTTAAGGGCAGCAACCAGAGTTAC
Figure 5, 6	mouse_Zc3h7a_g1	TTCTGGTCAGTGCTCTGATT	mouse_Zc3h7a-V5_ssODN	75 bp	CTTCTGCTGTGTGCCTCTCAACACTTGCAATTTTTCTGGTCAGTGCTCTGATTGGCTTACATAAAAGCCAGCATATTACGTAGAATCGAGACCGAGGAGAGGGTTAGGGATAGGCTTACCCTTTAAATCTTTAAACAAAAAACTATATTTTCCAAAGTCATTATCATTTGGGGCAATTAAGTGATCTTTCCGTGC
Figure 5, 6	mouse_Zc3h7b_g1	ATGGCAAAGTCTTGGGGTCG	mouse_Zc3h7b-V5_ssODN	75 bp	GGGGACACCACTGGTGCCACCCCAGATGCCCCTGTTGCTGCAACTGCTACTGCTGCCACCACCACCACTGGGGAGGGTAAGCCTATCCCTAACCCTCTCCTCGGTCTCGATTCTACGTAGGGCCAGGTCTCAGCTATGGCAAAGTCTTGGCGTCGGGCGTGGGTTGGGGGCAGGGGACTACCCCATCAGGCAGGC
Figure 5, 6	mouse_Zeb1_g1	AGCTTAGGAGTTCTTCTAAA	mouse_Zeb1-V5_ssODN	75 bp	CAGAAGGCCAGCGAGAGCGAGATGGAGAGCGAAAGCGAGAGTGAGCAGCTGTCTGAAGAGAAGACAAATGAAGCTGGTAAGCCTATCCCTAACCCTCTCCTCGGTCTCGATTCTACGTAGGAGTTCTTCTAAAAGCAAATTCTACTTGCTAATGAAATTTGCTCTATATTACCCACGCTTTTCATGGAAACATGG
Figure 5, 6	mouse_Zfat_g1	CCACCAAGGCTGGCTGCCAC	mouse_Zfat-V5_ssODN	75 bp	AAGAGCACAGATGGGTCTGGTGGGTTAGGTGGTCTCCAGGCCCACCAAGGCTGGCTGCCACAGCAGGCAGGGATTCTACGTAGAATCGAGACCGAGGAGAGGGTTAGGGATAGGCTTACCGAGTTCTGGGGCTGGCTGCTCCCCAACCTGCTCCTCCACGGGCTGTACAGCCTCTTGCACGTATACGATGAACTC
Figure 5, 6	mouse_Zfhx2_g1	GCCCTCTCTTGTCCCCATCT	mouse_Zfhx2-V5_ssODN	75 bp	ATGAGGTGGGCAGAGCTGAAGGTTGGGGTGAGGGAACCCTGAGGCCCTCTCTTGTGCCCATCTTGCTTTATCTGTTTACGTAGAATCGAGACCGAGGAGAGGGTTAGGGATAGGCTTACCTAAAGCTAGAAGTGTAGAGGTAGTAGTAGTTTTTGGGTTGGGGTCCGTGTGAGGTAATCTTGCTTCCTCTTTGGC
Figure 5, 6	mouse_Zfp106_g1	TAAGGACTTCCCAACGTGGG	mouse_Zfp106-V5_ssODN	75 bp	GCCTGGAGAAGGACAGTGAACGGCCCATGGGAGAATTCTTCACTAAGGACTTCCCAACGTGCGAGCCAAAAAACTTCACGTAGAATCGAGACCGAGGAGAGGGTTAGGGATAGGCTTACCTGAATCTATTTTGCTGTCATCTTCAGCGTGGCGTTCAATATGTCCTGCAACGTCCTAGGGAACAAGGAGAGAGGG
Figure 5, 6	mouse_Zfp148_g1	AAAAAATGTGTAAATAATAC	mouse_Zfp148-V5_ssODN	75 bp	CCCTTGGTGAATGTAAATGATAATAGAGCTGGGATGACATCTTCACCAGATGCCACAACTGGCCAGACTTTTGGCGGTAAGCCTATCCCTAACCCTCTCCTCGGTCTCGATTCTACGTAAAAAAAAAAAAAATGTGTAAATAATACTGCCACTTTAGAACAGATTACTCAAGAGTGGGGTTGCTCTGTAAAATGG
Figure 5, 6	mouse_Zfp207_g1	TTCATCAAGTCTAATAGGTT	mouse_Zfp207-V5_ssODN	75 bp	CCCCCTTACCAAGGTGGGCCTCCTCGACCTCCAATGGGAATGAGACCTCCTGTAATGTCGCAAGGTGGCCGTTACGGTAAGCCTATCCCTAACCCTCTCCTCGGTCTCGATTCTACGTGATCTTACTTCATCAAGTCTAATAGCTTTGCAGATTAAACCTTTTCTCAACTTGTGCTGTTTATATAGACAAGCTTC
Figure 5, 6	mouse_Zfp219_g1	GAACGGTAGGGAGCCCTCTT	mouse_Zfp219-V5_ssODN	75 bp	AGTCCTCCACTAGAAGAGGAGGGCAGCCCAGGGCTGTCTAGATCCGGAGAGGCAGGTCTTGGGGGGCAAGAACGGGGTAAGCCTATCCCTAACCCTCTCCTCGGTCTCGATTCTACGTAGGGAGCCCTCTTAGCAGTGATTAGCTTAGTAAGCTTACCCCGCAGGAGCGGGGAAGTGCTAGAGGTAGTTGGGTAG
Figure 5, 6	mouse_Zfp236_g1	TGTTCTGATGCCTTGGAAAG	mouse_Zfp236-V5_ssODN	75 bp	GAGCTAAGGACCCTCCACTTGGAGGAGGTGGTGCCTGAGGCGGCGGGTGAATGGCAGACCCTGACCAATGTGTTCGGTAAGCCTATCCCTAACCCTCTCCTCGGTCTCGATTCTACGTGATGCCTTGGAAAGAGCTCAGAGCACCCTCCATGCAGCTGCACGTGAGGGCTAGAGCCCTAGAGGCTCTGTTCTGAA
Figure 5, 6	mouse_Zfp266_g1	ATTTAAAGGTGGCAACAGAT	mouse_Zfp266-V5_ssODN	75 bp	CCCACACAAAGCAGTTAAGACTAATCTGATGATCTTTGGTGTCACTGTCAATATTTAAAGGTGCCAACAGATAGCCTACGTAGAATCGAGACCGAGGAGAGGGTTAGGGATAGGCTTACCAATAGCAACGGCCATACCCTCACATTGATAGGGCTTCTCCTCAGTGTGAACTCTGCTGTGTTTCCTCAGTCGTGA
Figure 5, 6	mouse_Zfp36l1_g1	GGGGGGGTCCCTCCCTACCC	mouse_Zfp36l1-V5_ssODN	75 bp	GGGTGGGGAGGTGAAGGGAAGAGATGGGGTGGAGAGGTGAAGGAGGCATGGGGGGGGGTCGCTCCCTACCCTGCCTTACGTAGAATCGAGACCGAGGAGAGGGTTAGGGATAGGCTTACCGTCATCTGAGATGGAGAGTCTGCTGAAAATGGGCAGGCGTCTTGAGTTGTCCAAGGTAGGGGAGTCTGAGCCACT
Figure 5, 6	mouse_Zfp36l2_g1	AGGCAAGGGGGCGCCCGCGA	mouse_Zfp36l2-V5_ssODN	75 bp	AGCGGCTCCGAGTCCCCCAGCCTGGACCCTGGCCGTCGCCTACCCATCTTCAGCCGCCTCTCCATCTCCGACGACGGTAAGCCTATCCCTAACCCTCTCCTCGGTCTCGATTCTACGTGAGGCAAGGGGGCGCCCGCGAGGCGTTGGGAAAGCCACAGCGGGGGCCACCGGTTGGGGAGGGCGACACTGCGGCAG
	Note: TF-A and TF-B denote the same gene with different C-termini (transcript variants); different gRNAs and ssODNs were designed for them
	for example mouse_Nfic-A_g1 & mouse_Nfic-B_g1 are two different gRNAs for the same gene Nfic
