# Supplementary material for: An efficient and scalable pipeline for epitope tagging in mammalian stem cells using Cas9 ribonucleoprotein
Source: eLife. 2018 Apr 11;7:e35069. doi: 10.7554/eLife.35069 (PMC5947990; doi:10.7554/eLife.35069)
Supplement: Supplementary file 2. [file elife-35069-supp2.xlsx]

## Sheet: Primers used for PCR genotyping
Primer-pairs used for PCR genotyping in mouse GNS cells
V5 knock-in experiment	Forward Primer (TF exon)	Reverse Primer (V5)	Product size after V5 knock-in (bp)	PCR result
Foxa1/guide 1	TTCGAGAACGGCTGCTACTT	ACCGAGGAGAGGGTTAGGGAT	675	+
Foxa2/guide 1	CGCTTCAAGTGTGAGAAGCA	ACCGAGGAGAGGGTTAGGGAT	648	+
Foxb2/guide 1	ACCACAGGCTTCAAACATCC	ACCGAGGAGAGGGTTAGGGAT	537	+
Foxc1/guide 1	GCCACTTACCACTGCAACCT	ACCGAGGAGAGGGTTAGGGAT	501	-
Foxc2/guide 1	GCAGTATGCGGGCTATGAGT	ACCGAGGAGAGGGTTAGGGAT	524	-
Foxd2/guide 1	CTTACGGCTACGGCTACGG	ACCGAGGAGAGGGTTAGGGAT	707	-
Foxd3/guide 1	GTACCCGTACGCGCTACCAC	ACCGAGGAGAGGGTTAGGGAT	565	-
Foxd4/guide 1	CCTCCTGCTCCGCTACTCT	ACCGAGGAGAGGGTTAGGGAT	676	+
Foxe1/guide 1	CTCGGACCTGTCCACCTACC	ACCGAGGAGAGGGTTAGGGAT	685	-
Foxe3/guide 1	CCTCAACGACTGTTTCGTCA	ACCGAGGAGAGGGTTAGGGAT	544	-
Foxf1/guide 1	CTCGAGCAGGACTTGGAGTT	ACCGAGGAGAGGGTTAGGGAT	485	+
Foxf2/guide 1	AGGTCTCCCAGCACAAGAGA	ACCGAGGAGAGGGTTAGGGAT	494	+
Foxg1/guide 1	AGTTACAACGGGACCACGTC	ACCGAGGAGAGGGTTAGGGAT	522	+
Foxh1/guide 1	TCAGCATCAAGTCCCTGCTA	ACCGAGGAGAGGGTTAGGGAT	641	+
Foxi2/guide 1	TGACTGTGGAGGCCTATTCC	ACCGAGGAGAGGGTTAGGGAT	587	-
Foxj1/guide 1	GCTGCTTCAGGAGTTTGAGG	ACCGAGGAGAGGGTTAGGGAT	547	+
Foxj2/guide 1	ATCTGGGGAGAGGGAAGTTG	ACCGAGGAGAGGGTTAGGGAT	818	-
Foxj3/guide 1	GCCTTCCTTACTGCAGGCTA	ACCGAGGAGAGGGTTAGGGAT	535	+
Foxk1/guide 1	GGGCAGAGAAAGAACTGTGG	ACCGAGGAGAGGGTTAGGGAT	404	+
Foxk2/guide 1	GTTCTCCATCCTCCAGGTGA	ACCGAGGAGAGGGTTAGGGAT	477	+
FoxL2/guide 1	CCACCCAAGTACCTGCAATC	ACCGAGGAGAGGGTTAGGGAT	597	-
Foxm1/guide 1	ACATTGCCTGTCTCCTCCAC	ACCGAGGAGAGGGTTAGGGAT	498	+
Foxn2/guide 1	TCACAGGTGAGAAGCCACTG	ACCGAGGAGAGGGTTAGGGAT	557	+
Foxn3/guide 1	CGTCTGCAGGAATAGCATCA	ACCGAGGAGAGGGTTAGGGAT	583	-
Foxn4/guide 1	GGTGAGTCGGTCAGGTCTGT	ACCGAGGAGAGGGTTAGGGAT	643	+
Foxo1/guide 1	GCAGACACTTCAGGACAGCA	ACCGAGGAGAGGGTTAGGGAT	679	+
Foxo3/guide 1	CTCCAAGACCTGCTTGCTTC	ACCGAGGAGAGGGTTAGGGAT	642	+
Foxo4/guide 1	CAAGAAGAAGCCGTCTGTCC	ACCGAGGAGAGGGTTAGGGAT	904	+
Foxo6/guide 1	GACCATCCAGGAGAACAAGC	ACCGAGGAGAGGGTTAGGGAT	598	-
Foxp1/guide 1	AAGGGCCTTGGGTAACTTGT	ACCGAGGAGAGGGTTAGGGAT	527	+
Foxp3/guide 1	TACTGCAAGCCAGGTCAGTG	ACCGAGGAGAGGGTTAGGGAT	651	-
Foxp4/guide 1	CATGCCATCTCTCCCATCTT	ACCGAGGAGAGGGTTAGGGAT	468	-
Foxq1/guide 1	CAAGTTCTCCAGCTCCTTCG	ACCGAGGAGAGGGTTAGGGAT	445	-
Sox1/guide 1	ATGTCAACGGCTGGGCTA	ACCGAGGAGAGGGTTAGGGAT	656	-
Sox3/guide 1	AGATGCACCGCTACGACAT	ACCGAGGAGAGGGTTAGGGAT	476	-
Sox4/guide 1	AGTGAAGCGCGTCTACCTGT	ACCGAGGAGAGGGTTAGGGAT	571	+
Sox5/guide 1	GCCAAAGTGATCTGGGAGTC	ACCGAGGAGAGGGTTAGGGAT	622	+
Sox6/guide 1	CCAATGCCAAGTGTGATCTG	ACCGAGGAGAGGGTTAGGGAT	613	+
Sox7/guide 1	CCCTTACTCACCGGAGTTCA	ACCGAGGAGAGGGTTAGGGAT	475	+
Sox8/guide 1	CCAGAACATCGACTTCAGCA	ACCGAGGAGAGGGTTAGGGAT	658	+
Sox9/guide 1	ACCAATACTTGCCACCCAAC	ACCGAGGAGAGGGTTAGGGAT	668	+
Sox10/guide 1	GGAGATCAGCCACGAGGTAA	ACCGAGGAGAGGGTTAGGGAT	592	+
Sox11/guide 1	GAAGACGACGACGAAGATGAC	ACCGAGGAGAGGGTTAGGGAT	642	-
Sox12/guide 1	GAGGAGCTGCTGGAAGTACG	ACCGAGGAGAGGGTTAGGGAT	462	-
Sox13/guide 1	ATGACTGTGTGCGAGACTGG	ACCGAGGAGAGGGTTAGGGAT	673	-
Sox14/guide 1	CAGAGAAGCGGCCTTACATC	ACCGAGGAGAGGGTTAGGGAT	596	+
Sox15/guide 1	GAAGCTACACCAGGCTGAGG	ACCGAGGAGAGGGTTAGGGAT	632	-
Sox17/guide 1	GCTCCAGTCTCGGACTATGC	ACCGAGGAGAGGGTTAGGGAT	528	-
Sox18/guide 1	GGACCCGAGCTTCTGCTAC	ACCGAGGAGAGGGTTAGGGAT	415	+
Sox21/guide 1	GAAGGAGCATCCCGACTACA	ACCGAGGAGAGGGTTAGGGAT	652	-
Primer-pairs used for PCR genotyping in mouse GNS cells
V5 knock-in experiment	Forward Primer (TF exon)	Reverse Primer (V5)	Product size after V5 knock-in (bp)	PCR result
Foxa1/guide 2	TTCGAGAACGGCTGCTACTT	ACCGAGGAGAGGGTTAGGGAT	675	-
Foxa2/guide 2	CGCTTCAAGTGTGAGAAGCA	ACCGAGGAGAGGGTTAGGGAT	648	-
Foxb2/guide 2	ACCACAGGCTTCAAACATCC	ACCGAGGAGAGGGTTAGGGAT	537	-
Foxc1/guide 2	GCCACTTACCACTGCAACCT	ACCGAGGAGAGGGTTAGGGAT	501	-
Foxc2/guide 2	GCAGTATGCGGGCTATGAGT	ACCGAGGAGAGGGTTAGGGAT	524	-
Foxd2/guide 2	CTTACGGCTACGGCTACGG	ACCGAGGAGAGGGTTAGGGAT	707	-
Foxd3/guide 2	GTACCCGTACGCGCTACCAC	ACCGAGGAGAGGGTTAGGGAT	565	-
Foxd4/guide 2	CCTCCTGCTCCGCTACTCT	ACCGAGGAGAGGGTTAGGGAT	676	+
Foxe1/guide 2	CTCGGACCTGTCCACCTACC	ACCGAGGAGAGGGTTAGGGAT	685	-
Foxe3/guide 2	CCTCAACGACTGTTTCGTCA	ACCGAGGAGAGGGTTAGGGAT	544	-
Foxf1/guide 2	CTCGAGCAGGACTTGGAGTT	ACCGAGGAGAGGGTTAGGGAT	485	+
Foxf2/guide 2	AGGTCTCCCAGCACAAGAGA	ACCGAGGAGAGGGTTAGGGAT	494	+
Foxg1/guide 2	AGTTACAACGGGACCACGTC	ACCGAGGAGAGGGTTAGGGAT	522	-
Foxh1/guide 2	TCAGCATCAAGTCCCTGCTA	ACCGAGGAGAGGGTTAGGGAT	641	+
Foxi2/guide 2	TGACTGTGGAGGCCTATTCC	ACCGAGGAGAGGGTTAGGGAT	587	+
Foxj1/guide 2	GCTGCTTCAGGAGTTTGAGG	ACCGAGGAGAGGGTTAGGGAT	547	+
Foxj2/guide 2	ATCTGGGGAGAGGGAAGTTG	ACCGAGGAGAGGGTTAGGGAT	818	-
Foxj3/guide 2	GCCTTCCTTACTGCAGGCTA	ACCGAGGAGAGGGTTAGGGAT	535	+
Foxk1/guide 2	GGGCAGAGAAAGAACTGTGG	ACCGAGGAGAGGGTTAGGGAT	404	+
Foxk2/guide 2	GTTCTCCATCCTCCAGGTGA	ACCGAGGAGAGGGTTAGGGAT	477	+
FoxL2/guide 2	CCACCCAAGTACCTGCAATC	ACCGAGGAGAGGGTTAGGGAT	597	-
Foxm1/guide 2	ACATTGCCTGTCTCCTCCAC	ACCGAGGAGAGGGTTAGGGAT	498	+
Foxn2/guide 2	TCACAGGTGAGAAGCCACTG	ACCGAGGAGAGGGTTAGGGAT	557	-
Foxn3/guide 2	CGTCTGCAGGAATAGCATCA	ACCGAGGAGAGGGTTAGGGAT	583	-
Foxn4/guide 2	GGTGAGTCGGTCAGGTCTGT	ACCGAGGAGAGGGTTAGGGAT	643	-
Foxo1/guide 2	GCAGACACTTCAGGACAGCA	ACCGAGGAGAGGGTTAGGGAT	679	+
Foxo3/guide 2	CTCCAAGACCTGCTTGCTTC	ACCGAGGAGAGGGTTAGGGAT	642	-
Foxo4/guide 2	CAAGAAGAAGCCGTCTGTCC	ACCGAGGAGAGGGTTAGGGAT	904	+
Foxo6/guide 2	GACCATCCAGGAGAACAAGC	ACCGAGGAGAGGGTTAGGGAT	598	-
Foxp1/guide 2	AAGGGCCTTGGGTAACTTGT	ACCGAGGAGAGGGTTAGGGAT	527	+
Foxp3/guide 2	TACTGCAAGCCAGGTCAGTG	ACCGAGGAGAGGGTTAGGGAT	651	-
Foxp4/guide 2	CATGCCATCTCTCCCATCTT	ACCGAGGAGAGGGTTAGGGAT	468	-
Foxq1/guide 2	CAAGTTCTCCAGCTCCTTCG	ACCGAGGAGAGGGTTAGGGAT	445	+
Sox1/guide 2	ATGTCAACGGCTGGGCTA	ACCGAGGAGAGGGTTAGGGAT	656	-
Sox3/guide 2	AGATGCACCGCTACGACAT	ACCGAGGAGAGGGTTAGGGAT	476	-
Sox4/guide 2	AGTGAAGCGCGTCTACCTGT	ACCGAGGAGAGGGTTAGGGAT	571	+
Sox5/guide 2	GCCAAAGTGATCTGGGAGTC	ACCGAGGAGAGGGTTAGGGAT	622	+
Sox6/guide 2	CCAATGCCAAGTGTGATCTG	ACCGAGGAGAGGGTTAGGGAT	613	+
Sox7/guide 2	CCCTTACTCACCGGAGTTCA	ACCGAGGAGAGGGTTAGGGAT	475	+
Sox8/guide 2	CCAGAACATCGACTTCAGCA	ACCGAGGAGAGGGTTAGGGAT	658	+
Sox9/guide 2	ACCAATACTTGCCACCCAAC	ACCGAGGAGAGGGTTAGGGAT	668	-
Sox10/guide 2	GGAGATCAGCCACGAGGTAA	ACCGAGGAGAGGGTTAGGGAT	592	+
Sox11/guide 2	GAAGACGACGACGAAGATGAC	ACCGAGGAGAGGGTTAGGGAT	642	-
Sox12/guide 2	GAGGAGCTGCTGGAAGTACG	ACCGAGGAGAGGGTTAGGGAT	462	-
Sox13/guide 2	ATGACTGTGTGCGAGACTGG	ACCGAGGAGAGGGTTAGGGAT	673	+
Sox14/guide 2	CAGAGAAGCGGCCTTACATC	ACCGAGGAGAGGGTTAGGGAT	596	+
Sox15/guide 2	GAAGCTACACCAGGCTGAGG	ACCGAGGAGAGGGTTAGGGAT	632	+
Sox17/guide 2	GCTCCAGTCTCGGACTATGC	ACCGAGGAGAGGGTTAGGGAT	528	-
Sox18/guide 2	GGACCCGAGCTTCTGCTAC	ACCGAGGAGAGGGTTAGGGAT	415	-
Sox21/guide 2	GAAGGAGCATCCCGACTACA	ACCGAGGAGAGGGTTAGGGAT	652	-
Primer-pairs used for PCR genotyping in mouse ES/NS cells
Gene	Forward primer	Reverse primer	Product size after V5 knock-in (bp)
CBCF	TCTTGCCTGTTAAAATATTGGTTG	ACCGAGGAGAGGGTTAGGGAT	421
CTCF	TGTGCAGTCTAGGGCTGGAT	ACCGAGGAGAGGGTTAGGGAT	540
EZH2	CTGTGGCTTTATCCCATGCT	ACCGAGGAGAGGGTTAGGGAT	533
HES1	TCGGTGACCCATCTTTTCTC	ACCGAGGAGAGGGTTAGGGAT	618
HES5	GCAGCATAGAGCAGCTGAAG	ACCGAGGAGAGGGTTAGGGAT	521
NFIA	TCAGCCACTCCATCGAATTT	ACCGAGGAGAGGGTTAGGGAT	498
PAX6	CCAGCTGAGGAGTGGAGAAG	ACCGAGGAGAGGGTTAGGGAT	554
POU3F1	GTTCTCGCAGACCACCATCT	ACCGAGGAGAGGGTTAGGGAT	523
POU3F2	AGTTCGCCAAGCAATTCAAG	ACCGAGGAGAGGGTTAGGGAT	545
POU3F3	GGCTCTGGGTACGCTCTATG	ACCGAGGAGAGGGTTAGGGAT	496
YBX1	ACCAGCATGGTTCTGTTTCC	ACCGAGGAGAGGGTTAGGGAT	516
Primer-pairs used for PCR genotyping of mouse NS/GNS clonal lines
Gene	Forward primer	Reverse primer	Product size after V5 knock-in (bp)
Sox2	TACCTCTTCCTCCCACTCCA	CTAGTCGGCATCACGGTTTT	427
Sox3	CAGCATGTACCTGCCACCT	GCAAACACCACAGCGATTC	441
Sox8	GACCTGCAGGCTTCCAACTA	TTGGAAACCACCAGTCACCT	460
Sox9	ACGCTGACCATCAGAACTCC	TCATGAGCTCAGACAAAGTCTTAAA	471
