# Supplementary material for: An efficient and scalable pipeline for epitope tagging in mammalian stem cells using Cas9 ribonucleoprotein
Source: eLife. 2018 Apr 11;7:e35069. doi: 10.7554/eLife.35069 (PMC5947990; doi:10.7554/eLife.35069)
Supplement: Supplementary file 3. [file elife-35069-supp3.xlsx]

## Sheet: ChIP-SICAP flow through
iBAQ OFF_CTR	iBAQ OFF_Olig2	Only identified by site	Reverse	Potential contaminant	IP-MS Moen et al PMID 28375211	BHLH	Peptides	Razor + unique peptides	Unique peptides	Sequence coverage [%]	Unique + razor sequence coverage [%]	Unique sequence coverage [%]	Mol. weight [kDa]	Q-value	Intensity	MS/MS Count	Peptides OFF_CTR	Peptides OFF_Olig2	Unique peptides OFF_CTR	Unique peptides OFF_Olig2	Intensity OFF_CTR	Intensity OFF_Olig2	Phospho (STY) site IDs	Phospho (STY) site positions	Protein IDs	Majority protein IDs	Protein names	Gene names
#!{Type}E	E	C	C	C	C	C	N	N	N	N	N	N	N	N	N	N	N	N	N	N	N	N	N	N	T	T	T	T
n. def.	5.95768						3	3	3	7.6	7.6	7.6	55.581	0	21772000	2	0	3	0	3	n. def.	7.3379	n. def.	n. def.	Q8R0T3;A0A068BIU7;Q3UM80;A0A068BFS0;Q9Z0H1	Q8R0T3;A0A068BIU7;Q3UM80;A0A068BFS0;Q9Z0H1	WD repeat-containing protein 46	Wdr46
5.70317	n. def.	+					1	1	1	0.8	0.8	0.8	194.01	1	40389000	0	1	0	1	0	7.60626	n. def.	n. def.	n. def.	Q1KYM2;Q1KYL9;A0A068ETZ5	Q1KYM2;Q1KYL9;A0A068ETZ5
n. def.	5.72049	+					1	1	1	12.6	12.6	12.6	13.516	1	3677800	1	0	1	0	1	n. def.	6.56559	0	95	A2NU19;A0A075B5S2;P01790;P01789;P01794;P01793;P01792;P01791;P01788;P01787	A2NU19;A0A075B5S2;P01790;P01789;P01794;P01793;P01792;P01791;P01788;P01787	Ig heavy chain V region M511;Ig heavy chain V region M603;Ig heavy chain V region HPCG14;Ig heavy chain V region HPCG13;Ig heavy chain V region HPCG8;Ig heavy chain V region HPCM6;Ig heavy chain V region H8;Ig heavy chain V regions TEPC 15/S107/HPCM1/HPCM2/HPCM3	Gm16698
n. def.	n. def.	+					1	1	1	13.3	13.3	13.3	11.101	1	0	1	0	1	0	1	n. def.	n. def.	n. def.	n. def.	X5J5I3;A0A075B5X6;X5J593;A0A0G2JFN9	X5J5I3;A0A075B5X6;X5J593;A0A0G2JFN9
4.91418	5.43605						2	2	2	3	3	3	98.278	0	14200000	2	1	2	1	2	6.51624	7.0381	n. def.	n. def.	A0A087WNM1;Q91Z67;A0A087WRV4;Q3UPB8;A0A087WS59;A0A087WSQ1	A0A087WNM1;Q91Z67;A0A087WRV4;Q3UPB8;A0A087WS59;A0A087WSQ1	SLIT-ROBO Rho GTPase-activating protein 2	Srgap2
5.37674	5.94097						2	2	2	14.1	14.1	14.1	25.347	0	11110000	3	1	2	1	2	6.37674	6.94097	n. def.	n. def.	A0A087WNN8;Q61263;Q06EZ3;A0A087WSJ5	A0A087WNN8;Q61263;Q06EZ3;A0A087WSJ5	Sterol O-acyltransferase 1;O-acyltransferase	Soat1
5.72331	5.93663						1	1	1	12.8	12.8	12.8	24.196	0	20896000	2	1	1	1	1	6.8994	7.11274	n. def.	n. def.	A0A087WNP6;Q4VAA2-2;Q4VAA2	A0A087WNP6;Q4VAA2-2;Q4VAA2	Protein CDV3	Cdv3
8.15494	8.27811						1	1	1	6.1	6.1	6.1	22.693	0.0084567	3658400000	3	1	1	1	1	9.19631	9.3195	n. def.	n. def.	A0A087WSG4;A0A087WP92;A0A0B4J1N9;A0A087WNZ7;G5E870	A0A087WSG4;A0A087WP92;A0A0B4J1N9;A0A087WNZ7;G5E870	E3 ubiquitin-protein ligase TRIP12	Trip12
5.3831	6.17278						8	8	8	7.9	7.9	7.9	134.21	0	107280000	12	5	7	5	7	7.17548	7.96518	n. def.	n. def.	A0A087WP83;Q8VDJ3;Q3V1M8;Q3U4Z7;Q8BX68;A0A087WQY9;A0A087WPC5;A0A087WS92;A0PJE9;A0A087WPH2	A0A087WP83;Q8VDJ3;Q3V1M8;Q3U4Z7;Q8BX68	Vigilin	Hdlbp
n. def.	5.53387	+					1	1	1	2	2	2	58.594	1	9572600	0	0	1	0	1	n. def.	6.98103	n. def.	n. def.	A0A087WPC3	A0A087WPC3
6.33961	6.87295						21	21	21	17.9	17.9	17.9	149.62	0	607910000	47	13	19	13	19	8.13893	8.67229	n. def.	n. def.	A0A087WPL5;E9QNN1;O70133;O70133-2;O70133-3;Q3UR42;A0A0R4J2C3;Q05BR6;Q3TF92;A0A087WRT3;Q3TEB2	A0A087WPL5;E9QNN1;O70133;O70133-2;O70133-3;Q3UR42	ATP-dependent RNA helicase A	Dhx9
5.7677	6.36953						2	2	2	29.3	29.3	29.3	12.974	0	17565000	4	1	2	1	2	6.54585	7.14768	n. def.	n. def.	Q3UQA7;A0A087WPM0;A0A087WNU1	Q3UQA7;A0A087WPM0;A0A087WNU1	Selenoprotein H	Selh
6.15719	6.79756						2	2	2	21.7	21.7	21.7	18.227	0	53972000	4	1	2	1	2	7.0023	7.64265	n. def.	n. def.	A0A087WQ14;A0A087WRA1;Q99JY9;Q3ULF7;Q3TWJ4;Q3TGW0;Q3TGE1;A0A087WPR6;A0A087WQ83;Q3UGH0;A0A087WS98;A0A087WP86	A0A087WQ14;A0A087WRA1;Q99JY9;Q3ULF7;Q3TWJ4;Q3TGW0;Q3TGE1;A0A087WPR6;A0A087WQ83;Q3UGH0;A0A087WS98;A0A087WP86	Actin-related protein 3	Actr3
n. def.	6.17444				OLIG2		1	1	1	7.6	7.6	7.6	19.462	0.0039714	8965800	1	0	1	0	1	n. def.	6.95259	n. def.	n. def.	A0A087WQ34;A0A087WQB0;Q3UIS6;Q569V4;Q3UBK1;P60762-2;P60762	A0A087WQ34;A0A087WQB0;Q3UIS6;Q569V4;Q3UBK1;P60762-2;P60762	Mortality factor 4-like protein 1	Morf4l1
n. def.	5.88583						1	1	1	6	6	6	25.89	0.0024651	10764000	2	1	1	1	1	n. def.	7.03197	n. def.	n. def.	A0A087WQ70;Q543R5;Q4FJU1;Q3TWH7;Q07235	A0A087WQ70;Q543R5;Q4FJU1;Q3TWH7;Q07235	Glia-derived nexin	Serpine2
4.45179	5.4823						2	2	2	2	2	2	191.41	0	25888000	2	1	1	1	1	6.34388	7.3744	n. def.	n. def.	P97789-3;P97789-2;P97789;A0A087WQN7;F8VQ87;A0A087WNV6	P97789-3;P97789-2;P97789;A0A087WQN7;F8VQ87;A0A087WNV6	5-3 exoribonuclease 1	Xrn1
n. def.	5.1086						1	1	1	3.4	3.4	3.4	33.714	0.0064702	2054500	1	0	1	0	1	n. def.	6.31271	n. def.	n. def.	A0A087WQR6;Q922K4;Q64514-2;Q3U4M7;Q3TW28;Q64514	A0A087WQR6;Q922K4;Q64514-2;Q3U4M7;Q3TW28;Q64514	Tripeptidyl-peptidase 2	Tpp2
n. def.	5.23216						1	1	1	7.8	7.8	7.8	22.717	0.0058097	1536000	1	0	1	0	1	n. def.	6.18639	n. def.	n. def.	A0A087WR93;A0A087WRG2;Q6NV83-3;Q6NV83-2;Q6NV83	A0A087WR93;A0A087WRG2;Q6NV83-3;Q6NV83-2;Q6NV83	U2 snRNP-associated SURP motif-containing protein	U2surp
5.92955	6.51276						2	2	2	30.7	30.7	30.7	8.4092	0	24641000	2	1	1	1	1	6.7077	7.2909	n. def.	n. def.	A0A087WRQ4;P63166;Q8BT45	A0A087WRQ4;P63166;Q8BT45	Small ubiquitin-related modifier 1	Sumo1;OTTMUSG00000016145
6.51186	6.44826						2	2	2	12	12	12	20.136	0	72682000	3	1	2	1	2	7.59103	7.52744	n. def.	n. def.	A0A087WS46;O70251	A0A087WS46;O70251	Elongation factor 1-beta	Eef1b
n. def.	n. def.	+					1	1	1	2.2	2.2	2.2	80.291	1	0	1	0	1	0	1	n. def.	n. def.	n. def.	n. def.	A0A087WSA4;Q3UYL2;F6TZK4;Q99NE5-6;F6Y0S3;F6VBV0;Q99NE5-5;Q99NE5-4;F6VBT9;F6VBR4;Q99NE5-3;Q99NE5	A0A087WSA4;Q3UYL2;F6TZK4;Q99NE5-6;F6Y0S3;F6VBV0;Q99NE5-5;Q99NE5-4;F6VBT9;F6VBR4;Q99NE5-3;Q99NE5	Regulating synaptic membrane exocytosis protein 1	Rims1
n. def.	5.82616						1	1	1	8.8	8.8	8.8	29.148	0	8041600	1	0	1	0	1	n. def.	6.90534	n. def.	n. def.	A0A087WSG5;A4FUR7;P51949	A0A087WSG5;A4FUR7;P51949	CDK-activating kinase assembly factor MAT1	Mnat1
n. def.	5.90368						2	2	2	5.3	5.3	5.3	50.774	0.0058824	19226000	2	0	2	0	2	n. def.	7.28389	n. def.	n. def.	E9PZ64;A0A087WSU4;Q61122;D3Z008;D3Z292;Q61127-2;Q3U247;Q3TYF1;Q61127;Q3TBL2	E9PZ64;A0A087WSU4;Q61122;D3Z008;D3Z292;Q61127-2;Q3U247;Q3TYF1;Q61127;Q3TBL2	NGFI-A-binding protein 1;NGFI-A-binding protein 2	Nab1;Nab2
5.61322	n. def.						1	1	1	7.2	7.2	7.2	25.616	0.0039683	4925000	1	1	0	1	0	6.69241	n. def.	n. def.	n. def.	A0A097PUD0;A0A097PUG4	A0A097PUD0;A0A097PUG4
n. def.	6.21267						3	3	3	9.2	9.2	9.2	50.063	0	31005000	4	1	3	1	3	n. def.	7.49143	n. def.	n. def.	A0A0A0MQ76;Q6DFW4;A0A087WP00;A0A087WQ46;A0A087WSU5	A0A0A0MQ76;Q6DFW4;A0A087WP00;A0A087WQ46	Nucleolar protein 58	Nop58
n. def.	4.62423				TCF4		1	1	1	0.6	0.6	0.6	260.64	0.0064935	4967200	1	0	1	0	1	n. def.	6.69611	n. def.	n. def.	Q69ZK6;A0A0A0MQ98;G3UZM1	Q69ZK6;A0A0A0MQ98;G3UZM1	Probable JmjC domain-containing histone demethylation protein 2C	Jmjd1c
n. def.	n. def.						1	1	1	11.7	11.7	11.7	16.112	0.0064332	0	1	1	0	1	0	n. def.	n. def.	7	97	B1AQW4;P10637;A0A0A0MQC7;A2A5Y6	B1AQW4;P10637;A0A0A0MQC7;A2A5Y6	Microtubule-associated protein tau	Mapt
n. def.	5.25947						3	3	3	4.9	4.9	4.9	122.17	0	12541000	3	0	3	0	3	n. def.	7.09833	n. def.	n. def.	Q8K1H1;A0A0A0MQD1	Q8K1H1;A0A0A0MQD1	Tudor domain-containing protein 7	Tdrd7
7.94675	8.37131						20	20	18	59.8	59.8	55.3	35.81	0	5177400000	69	17	18	15	16	9.15088	9.57542	n. def.	n. def.	P16858;D2KHZ9;A0A0A0MQF6;A0A1D5RLD8;S4R257;S4R1W1;Q3TUZ9;Q6IWE3;Q4VBD1;S4R1W8;V9GX06;Q3V2I5;A0A0R4J0X7;S4R2G5;Q64467;Q2VWQ4;S4R1N5;W8QM43;V9GXA7;Q8BJ40	P16858;D2KHZ9;A0A0A0MQF6;A0A1D5RLD8;S4R257;S4R1W1	Glyceraldehyde-3-phosphate dehydrogenase	Gapdh
n. def.	6.24917						1	1	1	18.3	18.3	18.3	13.024	0	10649000	1	0	1	0	1	n. def.	7.02731	n. def.	n. def.	A0A0A0MQG7;P70697	A0A0A0MQG7;P70697	Uroporphyrinogen decarboxylase	Urod
5.32455	5.84226						1	1	1	8.8	8.8	8.8	28.435	0	13598000	3	1	1	1	1	6.50063	7.01837	n. def.	n. def.	A0A0A0MQL8;Q8R1N4-3;Q8R1N4-2;Q8R1N4;B0FTY3	A0A0A0MQL8;Q8R1N4-3;Q8R1N4-2;Q8R1N4;B0FTY3	NudC domain-containing protein 3	Nudcd3
6.83469	7.45718						8	8	8	37.6	37.6	37.6	16.302	0	283910000	16	5	7	5	7	7.73779	8.36029	n. def.	n. def.	A0A0A0MQM0;P63242;Q8BGY2;Q66JR8;Q8VHU9;J3QPS8	A0A0A0MQM0;P63242;Q8BGY2	Eukaryotic translation initiation factor 5A-1;Eukaryotic translation initiation factor 5A-2	Eif5a;Eif5a2
5.90875	n. def.						1	1	1	12.8	12.8	12.8	14.222	0.0024691	8104900	1	1	0	1	0	6.90875	n. def.	n. def.	n. def.	Q05BL6;P26645;A0A0A1HAM8	Q05BL6;P26645;A0A0A1HAM8	Myristoylated alanine-rich C-kinase substrate	Marcks
6.75494	n. def.						2	2	2	14.9	14.9	14.9	21.175	0	34126000	1	2	0	2	0	7.53309	n. def.	n. def.	n. def.	Q921L3;Q3V4A0;A0A0A6YVS2	Q921L3;Q3V4A0;A0A0A6YVS2	Transmembrane and coiled-coil domain-containing protein 1	Tmco1
n. def.	6.40777						1	1	1	14.8	14.8	14.8	9.9734	0	12786000	1	0	1	0	1	n. def.	7.10673	n. def.	n. def.	A0A0A6YVU1;A2ATT5;Q9JKX6	A0A0A6YVU1;A2ATT5;Q9JKX6	ADP-sugar pyrophosphatase	Nudt5
5.4383	5.99047						2	2	2	7.6	7.6	7.6	42.06	0	13779000	4	2	2	2	2	6.47969	7.03185	n. def.	n. def.	Q9JKV1;A0A0A6YVU8;Q8VCI8;D3YUD8;A0A1S6GWG3	Q9JKV1;A0A0A6YVU8;Q8VCI8;D3YUD8;A0A1S6GWG3	Proteasomal ubiquitin receptor ADRM1	Adrm1;Gm9774
n. def.	5.01174						2	2	2	0.9	0.9	0.9	365.66	0.0064562	13151000	0	0	2	0	2	n. def.	7.11896	n. def.	n. def.	A0A0A6YW72	A0A0A6YW72
n. def.	6.01229						2	2	2	14.3	14.3	14.3	28.071	0	15431000	2	0	2	0	2	n. def.	7.18839	n. def.	n. def.	A0A0A6YX86;A0A0A6YW80;G3X8Y3;Q80UM3	A0A0A6YX86;A0A0A6YW80;G3X8Y3;Q80UM3	N-alpha-acetyltransferase 15, NatA auxiliary subunit	Naa15
6.20118	6.9527				OLIG2		4	4	4	35.3	35.3	35.3	23.122	0	126690000	10	2	4	2	4	7.28037	8.03189	n. def.	n. def.	D3YVN1;A0A0A6YWG8;Q9Z2N8;Q505L1;Q3TF62;D3Z4L2;F8WI57;Q99MR0	D3YVN1;A0A0A6YWG8;Q9Z2N8;Q505L1;Q3TF62	Actin-like protein 6A	Actl6a
4.81794	5.15694						1	1	1	2.9	2.9	2.9	50.811	0	5022800	2	1	1	1	1	6.19816	6.53715	n. def.	n. def.	A0A0A6YWP6;A0A0A6YX18;Q8BVE3	A0A0A6YWP6;A0A0A6YX18;Q8BVE3	V-type proton ATPase subunit H	Atp6v1h
n. def.	n. def.						1	1	1	2.6	2.6	2.6	47.77	0.0059701	0	1	1	0	1	0	n. def.	n. def.	n. def.	n. def.	A0A0A6YWQ9;Q8BVN9	A0A0A6YWQ9;Q8BVN9	Protein maelstrom homolog	Mael
n. def.	6.06318	+					1	1	1	23.1	23.1	23.1	6.2343	1	3469700	1	0	1	0	1	n. def.	6.54029	10	10	A0A0A6YXE1;A0A0A6YWS6;A0A0R4J114;Q8BTT6	A0A0A6YXE1;A0A0A6YWS6;A0A0R4J114;Q8BTT6	Digestive organ expansion factor homolog	Diexf
n. def.	6.23832						1	1	1	10.7	10.7	10.7	13.552	0	13848000	2	1	1	1	1	n. def.	7.14139	n. def.	n. def.	A0A140LIR0;A0A140LJH2;A0A0A6YY08;A0A140LID3;A0A140LIN2;Q8R1V9;D3Z158;Q8BU21;Q8BML9;Q3TN94;Q3TIN2	A0A140LIR0;A0A140LJH2;A0A0A6YY08;A0A140LID3;A0A140LIN2;Q8R1V9;D3Z158;Q8BU21;Q8BML9;Q3TN94;Q3TIN2		Qars
5.38959	6.27948						4	4	4	11	11	11	61.475	0	53711000	8	1	4	1	4	6.78754	7.67742	n. def.	n. def.	Q9CSN1;A0A0B4J1E2;Q9CV75;Q3TM37;Q80VH1	Q9CSN1;A0A0B4J1E2;Q9CV75;Q3TM37	SNW domain-containing protein 1	Snw1
9.80729	9.8349						21	21	0	58.4	58.4	0	24.165	0	132540000000	279	19	18	0	0	10.8073	10.8349	11	57	A2NHM3;A0A125T908;A0A0D5ZY64;Q65ZC0;A2P1G9;A0A125T906;A0A0F7R1B7;A0A0M3KL49;I6L991;I6L978;I6L958;A0A125T904;A0A0U5BC76;A0A0M4KEQ7;A0A0C6EL31;A0A0B6VQ20;Q5XFY8;I6L9E2;Q7TS98;Q52L95;I6L9E1;A0A5E3;A0A0E4B213;A0A0F7R5U8;Q52L64;P01837;A0A075B5P2;A2NVX3;A2NVX2;A2NVX1;A2NVX0;A2NVW8;B5UB67;B5DC72;A0A140T8M0;A0A0B4J1I0;A2NN81;Q53VP8;A0A075B5K8;F6XWB2;A0A140T8N1;A2NV19;A0A140T8M9;A0A075B5N0;A0A0G2JDE5	A2NHM3;A0A125T908;A0A0D5ZY64;Q65ZC0;A2P1G9;A0A125T906;A0A0F7R1B7;A0A0M3KL49;I6L991;I6L978;I6L958;A0A125T904;A0A0U5BC76;A0A0M4KEQ7;A0A0C6EL31;A0A0B6VQ20;Q5XFY8;I6L9E2;Q7TS98;Q52L95;I6L9E1;A0A5E3;A0A0E4B213;A0A0F7R5U8;Q52L64;P01837;A0A075B5P2	Ig kappa chain C region	Igkc;Igk;Gm1499;Gm16939;Gm10880;Igkv8-30
6.15293	n. def.	+					1	1	1	6.6	6.6	6.6	12.131	1	5688300	0	1	0	1	0	6.75498	n. def.	12	5	A0A0G2JDG7;A0A0G2JDR5;Q8BZQ9;Q9CYK1	A0A0G2JDG7;A0A0G2JDR5;Q8BZQ9;Q9CYK1	Tryptophan--tRNA ligase, mitochondrial	Wars2
n. def.	5.22678						2	2	2	5.3	5.3	5.3	62.697	0	5225700	2	0	2	0	2	n. def.	6.71814	n. def.	n. def.	A0A0G2JDI9;Q9DBZ6;Q91VT3;Q3UNS0;Q3U645;P55096	A0A0G2JDI9;Q9DBZ6;Q91VT3;Q3UNS0;Q3U645;P55096	ATP-binding cassette sub-family D member 3	Abcd3
6.20355	5.99001						2	2	2	19.5	19.5	19.5	13.426	0	20602000	4	2	1	2	1	7.10667	6.8931	n. def.	n. def.	A0A0G2JDL9;Q99JI6;Q52L50;Q3U7U8;P62835;C5H0E8;A0A1W2P777;A0A0G2JED9;A0A0G2JE52;C5H0E9;Q3V3W9	A0A0G2JDL9;Q99JI6;Q52L50;Q3U7U8;P62835;C5H0E8;A0A1W2P777;A0A0G2JED9;A0A0G2JE52;C5H0E9;Q3V3W9	Ras-related protein Rap-1b;Ras-related protein Rap-1A	Rap1b;Rap1a;Gm9392
n. def.	5.16307				OLIG2		1	1	1	0.9	0.9	0.9	103.95	0.0064748	4075900	1	0	1	0	1	n. def.	6.61022	n. def.	n. def.	Q8BJ53;Q812D4;A0A0H2UH17;Q80X50-2;Q812D5;A0A0G2JDV6;Q80X50-3;Q80X50-4;Q80X50;Q80X50-5	Q8BJ53;Q812D4;A0A0H2UH17;Q80X50-2;Q812D5;A0A0G2JDV6;Q80X50-3;Q80X50-4;Q80X50;Q80X50-5	Ubiquitin-associated protein 2-like	Ubap2l
6.109	n. def.						1	1	1	10.1	10.1	10.1	15.301	0	6426700	1	1	0	1	0	6.80799	n. def.	n. def.	n. def.	A0A0G2JFI6;Q99JN5;A0A0G2JDV8;Q9DAW9	A0A0G2JFI6;Q99JN5;A0A0G2JDV8;Q9DAW9	Calponin-3	Cnn3
7.86646	8.02313						5	5	3	41.5	41.5	15.9	9.2327	0	716010000	12	5	4	3	2	8.46852	8.6252	n. def.	n. def.	A0A0G2JDW7;Q6ZWU9;A0A0G2JG29;A0A0G2JEX7	A0A0G2JDW7;Q6ZWU9;A0A0G2JG29	40S ribosomal protein S27	Rps27
5.20401	n. def.	+					1	1	1	2	2	2	56.954	1	4478800	0	1	0	1	0	6.65116	n. def.	n. def.	n. def.	A0A0G2JE12	A0A0G2JE12
n. def.	6.41981						1	1	1	17.9	17.9	17.9	13.098	0.0057845	15775000	1	0	1	0	1	n. def.	7.19797	n. def.	n. def.	A0A0G2JE27;Q5RKN9;Q3UAS2;Q3TLJ0;P47753	A0A0G2JE27;Q5RKN9;Q3UAS2;Q3TLJ0;P47753	F-actin-capping protein subunit alpha-1	Capza1
n. def.	6.92282						2	2	2	22	22	22	14.731	0.00089526	33487000	2	0	2	0	2	n. def.	7.52488	n. def.	n. def.	A0A0G2JE32;Q9D7F5;Q9D1S1;Q4QQL2;Q3UT95;Q3U5V6;P62838;P61079;A0A0G2JGL0;Q3UFQ4;P61080;Q6ZWY6	A0A0G2JE32;Q9D7F5;Q9D1S1;Q4QQL2;Q3UT95;Q3U5V6;P62838;P61079;A0A0G2JGL0;Q3UFQ4;P61080;Q6ZWY6	Ubiquitin-conjugating enzyme E2 D2;Ubiquitin-conjugating enzyme E2 D3;Ubiquitin-conjugating enzyme E2 D1;Ubiquitin-conjugating enzyme E2 D2B	Ube2d3;Ube2d2a;Ube2d2;Ube2d1;Ube2d2b
n. def.	5.43045						1	1	1	3.7	3.7	3.7	39.698	0	3772000	1	0	1	0	1	n. def.	6.57657	n. def.	n. def.	Q9JK48-3;Q9JK48;Q9JK48-2;A0A0G2JEC4	Q9JK48-3;Q9JK48;Q9JK48-2;A0A0G2JEC4	Endophilin-B1	Sh3glb1
6.09307	6.41						5	5	4	16.5	16.5	14.8	51.014	0	72379000	7	3	3	3	2	7.37184	7.68875	n. def.	n. def.	A0A0H2UH27;Q61584-2;A0A0G2JEP0;Q61584-5;Q61584-6;Q61584-4;Q61584-3;Q61584;Q61584-7;Q8C7U4	A0A0H2UH27;Q61584-2;A0A0G2JEP0;Q61584-5;Q61584-6;Q61584-4;Q61584-3;Q61584;Q61584-7	Fragile X mental retardation syndrome-related protein 1	Fxr1
7.01849	7.53564						10	10	10	56	56	56	21.622	0	402860000	25	7	9	7	9	7.97273	8.48987	n. def.	n. def.	A0A0G2JES3;Q5EBQ6;P51410;A0A140T8T4;Q5M9J5;D3Z629;A0A0G2JFQ3;D3YZT0;S4R1R7	A0A0G2JES3;Q5EBQ6;P51410;A0A140T8T4;Q5M9J5;D3Z629	60S ribosomal protein L9	Rpl9
n. def.	n. def.	+					1	1	1	4	4	4	46.142	1	0	1	1	0	1	0	n. def.	n. def.	15	47	A0A0G2JEV6;Q8BNB6;Q9QUQ5-2;Q9QUQ5;Q8BNT2;Q0VB97	A0A0G2JEV6;Q8BNB6;Q9QUQ5-2;Q9QUQ5;Q8BNT2;Q0VB97	Short transient receptor potential channel 4	Trpc4
n. def.	5.26019						1	1	1	1.5	1.5	1.5	116.31	0.0032653	10741000	1	0	1	0	1	n. def.	7.03104	n. def.	n. def.	A0A0G2JEY9;A0A1D5RLX6;Q8BKW6;E9PUP1	A0A0G2JEY9;A0A1D5RLX6;Q8BKW6;E9PUP1		Syde2
n. def.	6.07653						3	3	3	17.6	17.6	17.6	29.325	0	19083000	3	0	3	0	3	n. def.	7.28065	n. def.	n. def.	A0A0G2JF52;Q9R0Q6;D3YVI5;Q9CTB9	A0A0G2JF52;Q9R0Q6;D3YVI5;Q9CTB9	Actin-related protein 2/3 complex subunit 1A	Arpc1a
5.47582	6.93875						2	2	2	25	25	25	15.057	0	62887000	5	1	2	1	2	6.32091	7.78385	n. def.	n. def.	A0A0G2JFB4;A0A0G2JH04;Q3TK95;P63073;A0A0G2JGT5;Q8C470	A0A0G2JFB4;A0A0G2JH04;Q3TK95;P63073;A0A0G2JGT5;Q8C470	Eukaryotic translation initiation factor 4E	Eif4e
n. def.	5.03739						2	2	2	3.8	3.8	3.8	117.25	0	5558500	3	0	2	0	2	n. def.	6.74496	n. def.	n. def.	A0A0G2JFJ6;Q7TPD0;Q7TPD0-2;A0A4X7	A0A0G2JFJ6;Q7TPD0;Q7TPD0-2;A0A4X7	Integrator complex subunit 3	Ints3
4.78013	n. def.						1	1	1	2.3	2.3	2.3	53.006	0.0084151	1567100	1	1	0	1	0	6.1951	n. def.	n. def.	n. def.	Q9D394;Q9D394-3;Q9D394-4;Q9D394-2;A0A0G2JFT8	Q9D394;Q9D394-3;Q9D394-4;Q9D394-2;A0A0G2JFT8	Protein RUFY3	Rufy3
5.62977	5.90595						4	4	4	9.6	9.6	9.6	54.844	0	34485000	6	2	3	2	3	7.07693	7.35311	n. def.	n. def.	A0A0G2JG00;Q0P6B2;Q3TUE1;A0A0G2JGW9;Q91WJ8;Q3TIS5;A0A0G2JFY5;Q3UUU2;Q91WJ8-2;A0A0G2JFK2;A0A0G2JGV9;A0A0G2JG96	A0A0G2JG00;Q0P6B2;Q3TUE1;A0A0G2JGW9;Q91WJ8;Q3TIS5;A0A0G2JFY5;Q3UUU2;Q91WJ8-2;A0A0G2JFK2	Far upstream element-binding protein 1	Fubp1
n. def.	5.55045						2	2	2	7.9	7.9	7.9	51.96	0	10300000	1	0	2	0	2	n. def.	7.01284	n. def.	n. def.	A0A0G2JG60;Q6P9Z1	A0A0G2JG60;Q6P9Z1	SWI/SNF-related matrix-associated actin-dependent regulator of chromatin subfamily D member 3	Smarcd3
n. def.	n. def.	+					1	1	1	0.8	0.8	0.8	147.63	1	0	1	1	0	1	0	n. def.	n. def.	16	129	F6QGP8;A0A0G2JGH6	F6QGP8;A0A0G2JGH6		Zfp804b
5.70112	6.17149						1	1	1	7.1	7.1	7.1	21.607	0.0053476	19867000	2	1	1	1	1	6.70112	7.17149	n. def.	n. def.	F7CSZ6;F6XXE6;A0A0G2JGI9;F8VPN4	F7CSZ6;F6XXE6;A0A0G2JGI9;F8VPN4		Agl
n. def.	6.50913				OLIG2		1	1	1	6.7	6.7	6.7	21.705	0.00084388	41984000	1	0	1	0	1	n. def.	7.62308	n. def.	n. def.	A0A0G2JGY5;E9QME5;Q99PP7-2;E9QP19;Q99PP7	A0A0G2JGY5;E9QME5;Q99PP7-2;E9QP19;Q99PP7	E3 ubiquitin-protein ligase TRIM33	Trim33
n. def.	5.82792				OLIG2		5	5	5	7.8	7.8	7.8	136.49	0	41044000	8	0	5	0	5	n. def.	7.61325	n. def.	n. def.	Q5DW34-2;Z4YJZ7;A0A0H2UH19;Q5DW34;Q8BHB2;H7CHP8;Q5DW34-3;E9Q5A3;A0A0G2JFI9;Q8C358;Q8C3T0;Q3UF17;A0A1B0GXE2;Q8BRN2;Q6ZPG6;A2AIS5	Q5DW34-2;Z4YJZ7;A0A0H2UH19;Q5DW34;Q8BHB2;H7CHP8;Q5DW34-3;E9Q5A3	Histone-lysine N-methyltransferase EHMT1	Ehmt1
6.27242	6.65039						1	1	1	10.3	10.3	10.3	35.108	0	107840000	4	1	1	1	1	7.50288	7.88085	n. def.	n. def.	A0A0J9YKD4;Q9D6U7;P07310;A2RTA0	A0A0J9YKD4;Q9D6U7;P07310;A2RTA0	Creatine kinase M-type	Ckm
n. def.	4.68789						1	1	1	2.1	2.1	2.1	91.742	0.0058867	2144600	0	0	1	0	1	n. def.	6.33135	n. def.	n. def.	Q7TQ07-2;A0A0J9YTQ3;Q7TQ07;B2RUE2;A0A0R4J0E3	Q7TQ07-2;A0A0J9YTQ3;Q7TQ07;B2RUE2;A0A0R4J0E3	DNA polymerase nu	Poln
4.97102	5.4434						2	2	2	3.4	3.4	3.4	57.639	0.0059347	7793900	2	1	1	1	1	6.29323	6.76563	n. def.	n. def.	A0A0J9YTU9;Q69Z99	A0A0J9YTU9;Q69Z99	Zinc finger protein 512	Znf512
n. def.	5.17748	+					1	1	1	2.6	2.6	2.6	51.926	1	2708700	0	0	1	0	1	n. def.	6.43276	n. def.	n. def.	Q3U6F1;E9Q7W0;Q3UM17;P31266-2;A0A0J9YTV5;P31266	Q3U6F1;E9Q7W0;Q3UM17;P31266-2;A0A0J9YTV5;P31266	Recombining binding protein suppressor of hairless	Rbpj
5.04879	n. def.	+					1	1	1	7.3	7.3	7.3	22.065	1	1566400	0	1	0	1	0	6.1949	n. def.	17	102	A0A0J9YV00;A0A0J9YV21;Q8C555;Q9JI57-3;A0A0J9YTX7;Q9JI57-10;Q9JI57-9;Q9JI57-4;Q9JI57-8;Q9JI57-7;Q6PD35;Q5XJY7;Q9JI57-6;Q9JI57-2;Q9JI57-5;Q8BP10;Q9JI57	A0A0J9YV00;A0A0J9YV21;Q8C555;Q9JI57-3;A0A0J9YTX7;Q9JI57-10;Q9JI57-9;Q9JI57-4;Q9JI57-8;Q9JI57-7;Q6PD35;Q5XJY7;Q9JI57-6;Q9JI57-2;Q9JI57-5;Q8BP10;Q9JI57	General transcription factor II-I repeat domain-containing protein 1	Gtf2ird1
6.49393	6.74683						9	9	8	26.4	26.4	24.5	48.964	0	182720000	15	6	8	5	7	7.81616	8.06904	n. def.	n. def.	Q8C1B7-3;A0A0J9YTY0;Q8C1B7-2;Q8C1B7;A0A0J9YUL3;A0A0J9YUV6;A0A0J9YVA6	Q8C1B7-3;A0A0J9YTY0;Q8C1B7-2;Q8C1B7;A0A0J9YUL3	Septin-11	2011-09-01
n. def.	6.33173						3	3	3	11.2	11.2	11.2	46.527	0	40783000	3	0	3	0	3	n. def.	7.61048	n. def.	n. def.	A0A0J9YU62;O88712-2;O88712;A0A0J9YUM4;O88712-3;A0A0J9YU66;A0A0J9YVI3;A0A0J9YUR5;A0A0J9YTW3	A0A0J9YU62;O88712-2;O88712;A0A0J9YUM4;O88712-3	C-terminal-binding protein 1	Ctbp1
4.37703	5.45211						7	7	7	4.3	4.3	4.3	226.93	0	31318000	6	1	6	1	6	6.38564	7.46072	n. def.	n. def.	Q6PDG0;B9EJ54;A0A0J9YUD5;Q6ZQG1;Q6P9L5;Q80VE6;Q6P9Y6;Q3UFI7;E9Q880;Q9D6C1	Q6PDG0;B9EJ54;A0A0J9YUD5;Q6ZQG1;Q6P9L5		Nup205
5.04992	n. def.	+					2	1	1	3.5	3.5	3.5	94.032	1	5272600	2	1	1	0	1	6.72202	n. def.	18	116	A0A0J9YUE9;P39053-5;P39053-3;P39053-6;P39053-4;A0A0J9YUN4;P39053;Q9CUM4	A0A0J9YUE9;P39053-5;P39053-3;P39053-6;P39053-4;A0A0J9YUN4;P39053;Q9CUM4	Dynamin-1	Dnm1;Dnm2
n. def.	6.01452				OLIG2	+	3	3	2	10.3	10.3	5.1	68.369	0	25851000	4	0	3	0	2	n. def.	7.41248	n. def.	n. def.	A0A0J9YVG2;A0A0J9YUK1;A0A0J9YUP9;A0A0J9YUZ0;Q8CE98;Q60722-3;Q60722;A0A0J9YV88;A0A0J9YVG8;Q8BPX7;A0A0J9YV39;A0A0J9YV54;A0A0J9YUG4;A0A0J9YTU7;A0A0J9YTW1;A0A0J9YU37;A0A0J9YVI1;Q3UZE5;E9Q8G4;A0A1B0GXC8;A0A0J9YUW9;A0A140LIL4;A0A0J9YUY3;A0A0J9YUS2;A0A0J9YVC6;A0A0J9YUF5;A0A140LJC0;A0A0J9YU75;A0A0J9YU99;A0A0J9YUT3;A0A0J9YUT7;A0A0J9YTR9	A0A0J9YVG2;A0A0J9YUK1;A0A0J9YUP9;A0A0J9YUZ0;Q8CE98;Q60722-3;Q60722;A0A0J9YV88;A0A0J9YVG8;Q8BPX7;A0A0J9YV39;A0A0J9YV54;A0A0J9YUG4;A0A0J9YTU7;A0A0J9YTW1;A0A0J9YU37;A0A0J9YVI1;Q3UZE5;E9Q8G4	Transcription factor 4	Tcf4
n. def.	n. def.						1	1	1	0.8	0.8	0.8	164.3	0.0090278	0	2	1	0	1	0	n. def.	n. def.	n. def.	n. def.	A0A0J9YUP5;Q69ZK1;F8VQG7	A0A0J9YUP5;Q69ZK1;F8VQG7		N4bp2
6.07598	6.49801						12	12	12	18.5	18.5	18.5	93.308	0	199600000	20	6	12	6	12	7.73876	8.16077	n. def.	n. def.	Q6PD42;A0A0J9YUS5;E9PVC6;Q6NZJ6-2;E9Q9E1;E9PVC5;Q6NZJ6;Q8K0J8;Q8R2V4;A0A0J9YVC1;A0A0J9YUC1;Q3UZD9;E9Q770;Q6DI78;A2AMI7;Q80XI3-2;Z4YKC4;Q80XI3-4;A0A0R4J112;Q80XI3;A2AMI2;Q80XI3-3;A0A0N4SVL0	Q6PD42;A0A0J9YUS5;E9PVC6;Q6NZJ6-2;E9Q9E1;E9PVC5;Q6NZJ6;Q8K0J8;Q8R2V4	Eukaryotic translation initiation factor 4 gamma 1	Eif4g1
7.6772	8.03383						11	11	9	54.5	54.5	42.7	20.303	0	778270000	29	6	11	5	9	8.37616	8.73279	n. def.	n. def.	Q8C7C4;Q8BNM0;A0A0J9YUZ4;Q58EV5;Q497Z6;P63158;A0A0J9YUD8;Q8BQ02;Q6P202;Q3UBK2;Q3UJK0;D3YZ18;D3YVC6;Q8CH24	Q8C7C4;Q8BNM0;A0A0J9YUZ4;Q58EV5;Q497Z6;P63158;A0A0J9YUD8;Q8BQ02;Q6P202;Q3UBK2;Q3UJK0;D3YZ18	High mobility group protein B1	Hmgb1
n. def.	5.90344				TCF4		5	5	2	5.5	5.5	2	133.97	0	40032000	4	0	5	0	2	n. def.	7.60241	n. def.	n. def.	A0A0J9YV01;H9H9S3;Q9R0G7;Q3URW5;Q80TX6;A0A0M3HEP2;A0A0J9YVF6;E9PXY5;A0A0J9YUY9;Q8C5P2;A0A0J9YU94;Q8BSG9	A0A0J9YV01;H9H9S3;Q9R0G7;Q3URW5;Q80TX6;A0A0M3HEP2;A0A0J9YVF6	Zinc finger E-box-binding homeobox 2	Zeb2
n. def.	6.23185				OLIG2		3	3	3	8	8	8	47.802	0	34111000	3	0	3	0	3	n. def.	7.53289	n. def.	n. def.	A0A0J9YVG0;Q61074	A0A0J9YVG0;Q61074	Protein phosphatase 1G	Ppm1g
n. def.	n. def.	+					1	1	1	2.6	2.6	2.6	46.657	1	0	1	0	1	0	1	n. def.	n. def.	n. def.	n. def.	B2RXP9;F7D6F6;A0A0N4SUP2;A0A0N4SWI3	B2RXP9;F7D6F6;A0A0N4SUP2;A0A0N4SWI3		D6Ertd527e
n. def.	n. def.						1	1	1	14.4	14.4	14.4	13.24	0.00086356	0	1	0	1	0	1	n. def.	n. def.	n. def.	n. def.	A0A0N4SWB3;A0A0N4SUU3;Q8BN64;A0A0N4SUV6;Q9JHW4;Q3UGH6;Q3TAF0	A0A0N4SWB3;A0A0N4SUU3;Q8BN64;A0A0N4SUV6;Q9JHW4;Q3UGH6;Q3TAF0	Selenocysteine-specific elongation factor	Eefsec
4.93076	n. def.						1	1	1	3.8	3.8	3.8	53.504	0	2131500	1	1	0	1	0	6.32869	n. def.	n. def.	n. def.	Q8CCP7;A0A0N4SWH0;Q4VBG2;Q5DTM1;A0A0R4J0S6;Q6RHR9-2;Q3TQ86;Q4H4B5;Q6RHR9-3;E9PZ12;B9EKC0;A0A0N4SUZ0;Q4H4B4;Q6RHR9	Q8CCP7;A0A0N4SWH0;Q4VBG2;Q5DTM1;A0A0R4J0S6;Q6RHR9-2;Q3TQ86;Q4H4B5;Q6RHR9-3;E9PZ12;B9EKC0;A0A0N4SUZ0;Q4H4B4;Q6RHR9	Membrane-associated guanylate kinase, WW and PDZ domain-containing protein 1	Magi1
8.9893	8.83448						8	8	3	61.9	61.9	37.3	13.66	0	8293800000	34	5	7	2	3	9.68827	9.53345	n. def.	n. def.	A0A0N4SV66;A0AUV1;Q8CGP6;A3KPD0;Q8R1M2;Q8CGP7;Q8CGP5;Q8BFU2;C0HKE9;C0HKE8;C0HKE7;C0HKE6;C0HKE5;C0HKE4;C0HKE3;C0HKE2;C0HKE1;B2RVF0;A2AB79;Q8CGP4;P27661;Q64522;Q61668	A0A0N4SV66;A0AUV1;Q8CGP6;A3KPD0;Q8R1M2;Q8CGP7;Q8CGP5;Q8BFU2;C0HKE9;C0HKE8;C0HKE7;C0HKE6;C0HKE5;C0HKE4;C0HKE3;C0HKE2;C0HKE1;B2RVF0;A2AB79;Q8CGP4;P27661	Histone H2A;Histone H2A type 1-H;Histone H2A.J;Histone H2A type 1-K;Histone H2A type 1-F;Histone H2A type 3;Histone H2A.x	Hist1h2ah;H2afj;Hist1h2ak;Hist1h2af;Hist3h2a;Hist1h2ad;Hist1h2aa;H2afx
n. def.	6.13513						2	2	2	9.9	9.9	9.9	32.547	0	20475000	3	1	2	1	2	n. def.	7.31122	n. def.	n. def.	A0A0N4SVL9;Q9CQR6;A0A0N4SVE2;A0A0N4SW66	A0A0N4SVL9;Q9CQR6;A0A0N4SVE2;A0A0N4SW66	Serine/threonine-protein phosphatase 6 catalytic subunit	Ppp6c
n. def.	6.04825						2	2	2	26.4	26.4	26.4	10.323	0	5587400	2	0	2	0	2	n. def.	6.74721	n. def.	n. def.	A0A0N4SW34;P50518;A0A0N4SW07	A0A0N4SW34;P50518;A0A0N4SW07	V-type proton ATPase subunit E 1	Atp6v1e1
n. def.	7.29909				OLIG2		1	1	1	9.2	9.2	9.2	13.005	0	39821000	3	0	1	0	1	n. def.	7.60011	n. def.	n. def.	Q9ERV9;A0A1B0GR00;A0A1B0GRZ4;A0A1B0GS07;F6QH05;A0A1B0GT36;E9QAK6;F6TTJ9;Q62296-2;A0A0R4J1U4;Q80UL2;Q6PAQ8;Q3UFP5;E9PZ73;Q80W05;P30051;Q62296;A0A0R4IZY5;Q3USK5;P70210;Q3V262;Q3UPV9;Q3UMJ5;P48301;Q9Z0P8;F8VPU0;Q8VCA7	Q9ERV9;A0A1B0GR00;A0A1B0GRZ4;A0A1B0GS07;F6QH05;A0A1B0GT36;E9QAK6;F6TTJ9;Q62296-2;A0A0R4J1U4;Q80UL2;Q6PAQ8;Q3UFP5;E9PZ73;Q80W05;P30051;Q62296;A0A0R4IZY5;Q3USK5;P70210;Q3V262;Q3UPV9;Q3UMJ5;P48301;Q9Z0P8;F8VPU0;Q8VCA7	Transcriptional enhancer factor TEF-3;Transcriptional enhancer factor TEF-1;Transcriptional enhancer factor TEF-5;Transcriptional enhancer factor TEF-4	Tead2;Tead1;Tead3;Tead4
5.06149	6.04261						2	2	2	9.5	9.5	9.5	37.24	0	20711000	3	1	2	1	2	6.29195	7.27305	n. def.	n. def.	Q99JW4;A8CVP4;A0A0R4J005;A8CVP1;Q4ZJB3;E9QP62;Q9D7B2	Q99JW4;A8CVP4;A0A0R4J005;A8CVP1;Q4ZJB3;E9QP62;Q9D7B2	LIM and senescent cell antigen-like-containing domain protein 1	Lims1
6.46826	7.07008				NPAS3;OLIG2		4	4	3	14.8	14.8	12.2	34.69	0	249740000	10	4	4	3	3	7.69871	8.30053	n. def.	n. def.	Q8BQ10;Q58E49;O09106;D3YYI8;P70288;A0A0R4J008;Q3UXH8;Q3TMT1	Q8BQ10;Q58E49;O09106;D3YYI8;P70288;A0A0R4J008;Q3UXH8	Histone deacetylase;Histone deacetylase 1;Histone deacetylase 2	Hdac2;Hdac1;Gm10093
5.60696	5.9838						2	1	1	14.5	8.7	8.7	20.113	0.0084686	13679000	4	1	2	0	1	6.60696	6.9838	n. def.	n. def.	D3Z765;Q3TV90;Q9CYI4-2;A0A0R4J047;Q05D11;Q9CYI4	D3Z765;Q3TV90;Q9CYI4-2;A0A0R4J047;Q05D11;Q9CYI4	Putative RNA-binding protein Luc7-like 1	Luc7l
n. def.	6.24665						1	1	1	31.4	31.4	31.4	5.5854	0.0053763	5293900	1	0	1	0	1	n. def.	6.72378	n. def.	n. def.	D6RDT4;Q9JKP7;A0A0R4J091	D6RDT4;Q9JKP7;A0A0R4J091	DNA polymerase epsilon subunit 3	Pole3
5.12379	5.8671						2	2	2	9.2	9.2	9.2	22.165	0.0024876	9562800	2	1	1	1	1	6.16518	6.90849	n. def.	n. def.	Q9DBP5;A0A0R4J093	Q9DBP5;A0A0R4J093	UMP-CMP kinase	Cmpk1
n. def.	5.85897						1	1	1	4.3	4.3	4.3	42.704	0.0059835	9395400	1	0	1	0	1	n. def.	6.97292	n. def.	n. def.	O88291-2;D3YXQ7;O88291;A0A0R4J098	O88291-2;D3YXQ7;O88291;A0A0R4J098	DBIRD complex subunit ZNF326	Znf326;Zfp326
3.85803	n. def.	+					1	1	1	0.9	0.9	0.9	149.87	1	555280	0	1	0	1	0	5.74451	n. def.	24	871	P35969;A0A0R4J0A4	P35969;A0A0R4J0A4	Vascular endothelial growth factor receptor 1	Flt1
5.28418	5.99766						3	3	3	9.3	9.3	9.3	48.057	0	27301000	5	2	3	2	3	6.64591	7.35938	n. def.	n. def.	Q99KK2;A0A0R4J0B4;A0A0N4SW65;A0A0N4SWC3;Q99KK2-2	Q99KK2;A0A0R4J0B4	N-acylneuraminate cytidylyltransferase	Cmas
n. def.	5.41083						2	2	2	3.3	3.3	3.3	106.87	0	13392000	2	0	2	0	2	n. def.	7.12685	n. def.	n. def.	A0A0R4J0E4;Q7TQK1-2;Q7TQK1	A0A0R4J0E4;Q7TQK1-2;Q7TQK1	Integrator complex subunit 7	Ints7
n. def.	n. def.	+					1	1	1	1.8	1.8	1.8	73.417	1	0	1	0	1	0	1	n. def.	n. def.	n. def.	n. def.	A0A0R4J0G0	A0A0R4J0G0
n. def.	n. def.	+					1	1	1	4.3	4.3	4.3	61.851	1	0	1	1	0	1	0	n. def.	n. def.	27	21	Q1RLL3;A0A0R4J0J1	Q1RLL3;A0A0R4J0J1	Copine-9	Cpne9
n. def.	4.67223						1	1	1	2.2	2.2	2.2	69.653	0.0054945	1551500	0	0	1	0	1	n. def.	6.19075	n. def.	n. def.	A0A0R4J0L7;Q8C9B9-3;Q8C9B9	A0A0R4J0L7;Q8C9B9-3;Q8C9B9	Death-inducer obliterator 1	Dido1
n. def.	4.95869						1	1	1	1.9	1.9	1.9	71.558	0.0047281	2636900	1	0	1	0	1	n. def.	6.42109	n. def.	n. def.	Q8VDG3;Q3TUQ8;A0A0R4J0P6	Q8VDG3;Q3TUQ8;A0A0R4J0P6	Poly(A)-specific ribonuclease PARN	Parn
n. def.	5.82967						1	1	1	2.9	2.9	2.9	51.589	0.0053435	10809000	1	0	1	0	1	n. def.	7.03379	n. def.	n. def.	P28659-2;P28659-3;P28659;A0A0R4J0T5;P28659-4	P28659-2;P28659-3;P28659;A0A0R4J0T5;P28659-4	CUGBP Elav-like family member 1	Celf1
n. def.	n. def.	+					1	1	1	2.6	2.6	2.6	63.003	1	0	1	0	1	0	1	n. def.	n. def.	n. def.	n. def.	Q8C8R0;Q3TW41;Q3TN36;O54943;A0A0R4J0U3	Q8C8R0;Q3TW41;Q3TN36;O54943;A0A0R4J0U3	Period circadian protein homolog 2	Per2
n. def.	5.4522						1	1	1	2.4	2.4	2.4	76.129	0.0096419	10198000	1	0	1	0	1	n. def.	7.00852	n. def.	n. def.	E9Q361;Q8K2A7;E9Q360;A0A0R4J0V1	E9Q361;Q8K2A7;E9Q360;A0A0R4J0V1	Integrator complex subunit 10	Ints10
n. def.	5.82735						4	4	4	3.2	3.2	3.2	213.48	0	65181000	5	0	4	0	4	n. def.	7.81412	n. def.	n. def.	A0A0R4J0V5;O08847;P08775;Q3TC95	A0A0R4J0V5;O08847;P08775	DNA-directed RNA polymerase;DNA-directed RNA polymerase II subunit RPB1	Polr2a
n. def.	4.54557						1	1	1	2.7	2.7	2.7	68.075	0	1369700	1	0	1	0	1	n. def.	6.13663	n. def.	n. def.	Q9CRC8;A0A0R4J0W6	Q9CRC8;A0A0R4J0W6	Leucine-rich repeat-containing protein 40	Lrrc40
n. def.	5.47182	+					1	1	1	5.8	5.8	5.8	23.236	1	2074500	0	0	1	0	1	n. def.	6.31691	n. def.	n. def.	F6Q7T0;D3Z5A2;P16283-2;P16283-3;F8WHM3;Q9ERP4;P13808-4;P13808-5;Q3UGM4;P13808-2;A0A0R4J1K4;P16283;P13808-3;A0A0R4J1K9;Q7TPS4;Q3UKP0;P13808;A0A0R4J101;Q68EG4	F6Q7T0;D3Z5A2;P16283-2;P16283-3;F8WHM3;Q9ERP4;P13808-4;P13808-5;Q3UGM4;P13808-2;A0A0R4J1K4;P16283;P13808-3;A0A0R4J1K9;Q7TPS4;Q3UKP0;P13808;A0A0R4J101;Q68EG4	Anion exchange protein 3;Anion exchange protein 2	Slc4a3;Slc4a2
4.67142	6.14092						7	7	7	7	7	7	144.92	0	91532000	9	1	7	1	7	6.47761	7.94708	n. def.	n. def.	A0A0R4J119;Q7TMB8-2;Q7TMB8;A0A0U1RQ05;Q5SQX6;Q810V4;F6QD74;Q8C8R2;Q6PGK0	A0A0R4J119;Q7TMB8-2;Q7TMB8;A0A0U1RQ05	Cytoplasmic FMR1-interacting protein 1	Cyfip1
n. def.	5.19145						1	1	1	6.6	6.6	6.6	29.726	0.00089445	2486300	1	0	1	0	1	n. def.	6.39555	n. def.	n. def.	A0A0R4J146;Q3UFY7-2;Q3UFY7-4;Q3UFY7	A0A0R4J146;Q3UFY7-2;Q3UFY7-4;Q3UFY7	7-methylguanosine phosphate-specific 5-nucleotidase	Nt5c3b
4.66456	5.9487				TCF4		5	5	5	5.1	5.1	5.1	142.92	0	46738000	7	1	4	1	4	6.36352	7.64767	n. def.	n. def.	Q3URH5;G3UX35;Q3TKT4;Q3TKT4-2;A0A0R4J170;Q8R0K1;Q3UI73;Q3UX55;Q8CGJ5;Q8R569;Q8BQ54;Q7TQL1;Q6P8K2;Q7TND4;Q3UHL2;E9QAB8;Q6DIC0;F2Z4A9;H3BLH0;Q8R1W7;H3BJK2	Q3URH5;G3UX35;Q3TKT4;Q3TKT4-2;A0A0R4J170;Q8R0K1;Q3UI73	Transcription activator BRG1	Smarca4
n. def.	5.52454						1	1	1	6.7	6.7	6.7	25.336	0	4015300	1	0	1	0	1	n. def.	6.60372	n. def.	n. def.	Q9CSU0-3;Q9CSU0-2;A0A0R4J195;Q9CSU0	Q9CSU0-3;Q9CSU0-2;A0A0R4J195;Q9CSU0	Regulation of nuclear pre-mRNA domain-containing protein 1B	Rprd1b
n. def.	5.46256	+					1	1	1	1.8	1.8	1.8	70.827	1	9863700	1	0	1	0	1	n. def.	6.99404	34	290	A0A0R4J1A9;Q8VC66;Q69ZV4	A0A0R4J1A9;Q8VC66;Q69ZV4	Afadin- and alpha-actinin-binding protein	Ssx2ip
n. def.	n. def.	+					1	1	1	2.9	2.9	2.9	75.398	1	0	1	1	0	1	0	n. def.	n. def.	35	420	F2Z444;A0A0R4J1C3	F2Z444;A0A0R4J1C3		4933427D14Rik
n. def.	6.18605						1	1	1	8.4	8.4	8.4	19.668	0.0016708	6139300	0	0	1	0	1	n. def.	6.78812	n. def.	n. def.	D3Z002;D3Z1L0;Q924A0-9;Q8CAI6;Q8BS68;F6XQR1;F6WPX2;E9Q990;D3YWT3;Q924A0-2;A0A0R4J1G0;Q924A0-3;Q924A0;F6WBK9;E9QQ91;Q924A0-8;D3Z2K5;Q3V1G9;E9QQ90;Q924A0-4;E9QQ89	D3Z002;D3Z1L0;Q924A0-9;Q8CAI6;Q8BS68;F6XQR1;F6WPX2;E9Q990;D3YWT3;Q924A0-2;A0A0R4J1G0;Q924A0-3;Q924A0;F6WBK9;E9QQ91;Q924A0-8;D3Z2K5;Q3V1G9;E9QQ90;Q924A0-4;E9QQ89	Transcription factor 7-like 2	Tcf7l2
5.78364	6.14445						1	1	1	6.6	6.6	6.6	27.363	0	24027000	2	1	1	1	1	6.86282	7.22365	n. def.	n. def.	A0A0R4J1H0;Q3KNM2;A2RTC8	A0A0R4J1H0;Q3KNM2;A2RTC8	E3 ubiquitin-protein ligase MARCH5	2005-03-01
5.72221	5.71067						6	6	6	5	5	5	199.48	0	73920000	14	4	4	4	4	7.57346	7.56192	n. def.	n. def.	A0A0R4J1I6;Q9QY81;Q8BPS7;F6XGN0	A0A0R4J1I6;Q9QY81;Q8BPS7;F6XGN0	Nuclear pore membrane glycoprotein 210	Nup210
6.85737	7.34359						9	1	1	41.6	8.2	8.2	28.729	0	468150000	20	7	9	0	1	8.06149	8.5477	36	109	P57776-2;A0A0R4J1L2;Q91VK2;F6ZFU0;D3Z7N2;D3YZT9;D3YY68;Q8BW50	P57776-2;A0A0R4J1L2;Q91VK2;F6ZFU0;D3Z7N2;D3YZT9	Elongation factor 1-delta	Eef1d
n. def.	n. def.	+					1	1	1	2.1	2.1	2.1	85.716	1	0	1	1	0	1	0	n. def.	n. def.	37	685	A0A0R4J1L6;Q5DTU0;Q5DTU0-2	A0A0R4J1L6;Q5DTU0;Q5DTU0-2	Actin filament-associated protein 1-like 2	Afap1l2
n. def.	4.64967						1	1	1	1.1	1.1	1.1	141.95	0.00087032	2499500	1	0	1	0	1	n. def.	6.39785	n. def.	n. def.	D6RE33;Q3UJB9-2;A0A0R4J1Q0;Q3UJB9;G5E896	D6RE33;Q3UJB9-2;A0A0R4J1Q0;Q3UJB9;G5E896	Enhancer of mRNA-decapping protein 4	Edc4
5.68771	n. def.						1	1	1	0.9	0.9	0.9	153.17	0.005295	31668000	1	1	0	1	0	7.50062	n. def.	394	1133	A0A0R4J1Y6;Q6NSW3-4;Q6NSW3-2;E9PUC4;Q6NSW3;Q6NSW3-3	A0A0R4J1Y6;Q6NSW3-4;Q6NSW3-2;E9PUC4;Q6NSW3;Q6NSW3-3	A-kinase anchor protein SPHKAP	Sphkap
n. def.	4.28035	+					1	1	1	0.8	0.8	0.8	128.51	1	1048900	0	0	1	0	1	n. def.	6.02073	38	78	Q9DBV3;Q66JM5;D3YTV3;A0A0R4J217	Q9DBV3;Q66JM5;D3YTV3;A0A0R4J217	Probable ATP-dependent RNA helicase DHX34	Dhx34
5.52711	6.38335						5	5	5	15	15	15	49.815	0	55080000	7	2	5	2	5	6.82814	7.68438	n. def.	n. def.	Q8C650-2;A0A0R4J233;Q8C650;A0A1W2P6J7;A0A1W2P866	Q8C650-2;A0A0R4J233;Q8C650;A0A1W2P6J7	Septin-10	2010-09-01
6.2833	6.75946						9	9	6	24.9	24.9	19	58.751	0	214680000	10	4	8	1	5	7.73045	8.20661	n. def.	n. def.	G3UZI2;A0A0R4J259;Q7TMK9-2;G3V018;Q7TMK9;G3UZ48;G3UXJ6;G3UWM1;Q3TRV3;G3XA76	G3UZI2;A0A0R4J259;Q7TMK9-2;G3V018;Q7TMK9;G3UZ48;G3UXJ6;G3UWM1	Heterogeneous nuclear ribonucleoprotein Q	Syncrip
7.3719	n. def.	+					1	1	1	3.8	3.8	3.8	60.877	1	706360000	1	1	0	1	0	8.84903	n. def.	39	351	E9PUG7;Q61211;Q61211-2;A0A0R4J298	E9PUG7;Q61211;Q61211-2;A0A0R4J298	Eukaryotic translation initiation factor 2D	Eif2d
6.51991	6.98705						1	1	1	12.7	12.7	12.7	11.777	0.00083682	26034000	4	1	1	1	1	6.82094	7.28807	n. def.	n. def.	A0A0R4J2A1;Q9D958	A0A0R4J2A1;Q9D958	Signal peptidase complex subunit 1	Spcs1
4.50564	n. def.						1	1	1	0.6	0.6	0.6	220.42	0.002459	2562900	1	1	0	1	0	6.40873	n. def.	n. def.	n. def.	Q6QIY3-2;A0A0R5RP33;Q6QIY3;P70276;K3W4P8;A0A0R5RP34	Q6QIY3-2;A0A0R5RP33;Q6QIY3;P70276;K3W4P8;A0A0R5RP34	Sodium channel protein type 10 subunit alpha	Scn10a
n. def.	5.34167	+					1	1	1	8.5	8.5	8.5	14.457	1	1537300	0	0	1	0	1	n. def.	6.18676	n. def.	n. def.	A0A0U1RNM0;A0A0U1RNE8;A0A0U1RPR7;Q8VBT6	A0A0U1RNM0;A0A0U1RNE8;A0A0U1RPR7;Q8VBT6	Apolipoprotein B receptor	Apobr
n. def.	5.28287				TCF4		1	1	1	8.6	8.6	8.6	17.307	0	1534500	1	0	1	0	1	n. def.	6.18597	n. def.	n. def.	A0A0U1RNH1;A0A0U1RPT9;Q9DA08	A0A0U1RNH1;A0A0U1RPT9;Q9DA08	SAGA-associated factor 29 homolog	Ccdc101
n. def.	6.32379						2	2	2	10.2	10.2	10.2	33.038	0	25291000	2	0	2	0	2	n. def.	7.40297	n. def.	n. def.	Q6PE05;Q3TSS0;A0A0U1RNT6;Q3UZA2;A0A0U1RNK6;Q3UAP7;Q99J57;Q3THS6;Q3TED1;A0A0U1RQ95	Q6PE05;Q3TSS0;A0A0U1RNT6;Q3UZA2;A0A0U1RNK6;Q3UAP7;Q99J57;Q3THS6;Q3TED1;A0A0U1RQ95	S-adenosylmethionine synthase;S-adenosylmethionine synthase isoform type-2	Mat2a
5.07254	4.59347						2	2	2	1.3	1.3	1.3	238.09	0	16684000	2	2	1	2	1	7.09785	6.61878	n. def.	n. def.	A0A0U1RNK7;E9PX48;Q8R1A4-2;A2A9M5;Q8R1A4;A2A9M4;Q7TPP0;Q3U806	A0A0U1RNK7;E9PX48;Q8R1A4-2;A2A9M5;Q8R1A4;A2A9M4;Q7TPP0;Q3U806	Dedicator of cytokinesis protein 7	Dock7
n. def.	6.82485						4	4	4	29.9	29.9	29.9	23.834	0	93537000	6	0	4	0	4	n. def.	7.97098	n. def.	n. def.	Q05DR9;A0A0U1RNL9;Q0H9Q2;A0A0U1RNL1;P56671;F8VPK3	Q05DR9;A0A0U1RNL9;Q0H9Q2;A0A0U1RNL1;P56671;F8VPK3	Myc-associated zinc finger protein	Maz
n. def.	6.50307						1	1	1	10.4	10.4	10.4	11.847	0.00084317	19108000	1	0	1	0	1	n. def.	7.28122	n. def.	n. def.	A0A0U1RPE1;A0A0U1RPD3;Q6NVC2;D3Z3Y4;Q921W2;Q545C1;P70318	A0A0U1RPE1;A0A0U1RPD3;Q6NVC2;D3Z3Y4;Q921W2;Q545C1;P70318	Nucleolysin TIAR	Tial1
n. def.	4.6742						3	3	3	4.5	4.5	4.5	140.31	0	3353200	4	0	3	0	3	n. def.	6.52546	n. def.	n. def.	Q3UPZ9;Q3UTP3;Q8K284-2;A0A0U1RPD8;Q8K284;Q3UHL0;Q3UQ70;Q8K284-3;Q3UY03	Q3UPZ9;Q3UTP3;Q8K284-2;A0A0U1RPD8;Q8K284;Q3UHL0;Q3UQ70	General transcription factor 3C polypeptide 1	Gtf3c1
n. def.	6.10616						3	3	3	30.4	30.4	30.4	17.827	0	14046000	4	0	3	0	3	n. def.	7.14755	n. def.	n. def.	A0A0U1RPH8;Q3V300	A0A0U1RPH8;Q3V300	Kinesin-like protein KIF22	Kif22
4.13818	n. def.						1	1	1	2	2	2	92.071	0	453610	1	1	0	1	0	5.65668	n. def.	n. def.	n. def.	E9Q5Q0;Q3TYH7;Q3TGG2;Q7TQH0-3;Q7TQH0;Q7TQH0-2;A0A0U1RPL0	E9Q5Q0;Q3TYH7;Q3TGG2;Q7TQH0-3;Q7TQH0;Q7TQH0-2;A0A0U1RPL0	Ataxin-2-like protein	Atxn2l
5.07074	5.41108						3	3	3	4.1	4.1	4.1	127.25	0	21396000	5	2	2	2	2	6.82659	7.16696	n. def.	n. def.	A0A0U1RPW2;B9EHJ3;P39447;Q91YW2	A0A0U1RPW2;B9EHJ3;P39447	Tight junction protein ZO-1	Tjp1
5.78155	7.13159						9	9	9	38.9	38.9	38.9	36.766	0	212150000	14	3	8	3	8	6.95764	8.30767	n. def.	n. def.	A0A140LHA2;Q9WVA3;A0A140LJ21;A0A140LIM5;A0A140LI47	A0A140LHA2;Q9WVA3;A0A140LJ21	Mitotic checkpoint protein BUB3	Bub3
n. def.	n. def.	+					1	1	1	5.1	5.1	5.1	25.521	1	0	1	1	0	1	0	n. def.	n. def.	n. def.	n. def.	A0A140LIT1	A0A140LIT1
5.93242	6.28599						2	2	2	5.1	5.1	5.1	53.919	0	30666000	2	1	1	1	1	6.97382	7.32738	n. def.	n. def.	Q4FJX5;Q3UIQ5;O88455;A0A140LIT2	Q4FJX5;Q3UIQ5;O88455;A0A140LIT2	7-dehydrocholesterol reductase	Dhcr7
n. def.	5.63248						1	1	1	3.4	3.4	3.4	53.442	0.00086655	7722400	1	0	1	0	1	n. def.	6.88775	n. def.	n. def.	Q99LD4;Q99LD4-2;A0A140LJB7;Q3MIA8;B1ATU4;G3UXW9	Q99LD4;Q99LD4-2;A0A140LJB7;Q3MIA8;B1ATU4;G3UXW9	COP9 signalosome complex subunit 1	Gps1
n. def.	5.64708	+					1	1	1	4.4	4.4	4.4	36.233	1	7986400	1	0	1	0	1	n. def.	6.90235	48	114	F6Y9T6;A0A140T8I9;E9Q3L2;A0A1S6GWJ7	F6Y9T6;A0A140T8I9;E9Q3L2;A0A1S6GWJ7		Pi4ka
7.67494	7.91261						5	5	5	32.4	32.4	32.4	12.254	0	387240000	10	4	5	4	5	8.15207	8.38972	n. def.	n. def.	Q6ZWZ4;A0A140T8K6;Q5M9L1;P47964;D3YX71	Q6ZWZ4;A0A140T8K6;Q5M9L1;P47964	60S ribosomal protein L36	Rpl36
7.48014	7.80823						6	6	6	36.8	36.8	36.8	17.564	0	567060000	10	3	6	3	6	8.2583	8.58637	n. def.	n. def.	Q4V9X9;Q5M9M5;P62751;A0A140T8M7;Q91YK6;D3YTY6	Q4V9X9;Q5M9M5;P62751;A0A140T8M7;Q91YK6	60S ribosomal protein L23a	Rpl23a
n. def.	5.70409						4	4	4	6.9	6.9	6.9	87.56	0	28838000	4	0	4	0	4	n. def.	7.45997	n. def.	n. def.	Q8K327;A0A140T8S5	Q8K327;A0A140T8S5	Chromosome alignment-maintaining phosphoprotein 1	Champ1
5.97578	6.30402						5	5	5	15.7	15.7	15.7	41.784	0	71030000	8	3	5	3	5	7.35599	7.68423	49	55	A0A140T8T5;P27546-2;P27546;A0A0G2JFH2;P27546-4;A0A0G2JDN7;E9PZ43;P27546-3;A0A0G2JFT4;A0A0G2JG35;A0A0G2JE57;A0A0G2JDU1;A0A0G2JFK3;A0A0G2JDY5	A0A140T8T5;P27546-2;P27546;A0A0G2JFH2;P27546-4;A0A0G2JDN7;E9PZ43;P27546-3	Microtubule-associated protein 4;Microtubule-associated protein	Map4
n. def.	6.17551						2	2	2	13.8	13.8	13.8	30.752	0	20972000	2	0	2	0	2	n. def.	7.32164	n. def.	n. def.	Q60931;Q3TX38;Q3TTN3;A0A140T8V3;Q3UFA8;Q5EBQ0;J3QMG3	Q60931;Q3TX38;Q3TTN3;A0A140T8V3;Q3UFA8;Q5EBQ0;J3QMG3	Voltage-dependent anion-selective channel protein 3	Vdac3
6.73006	7.09847						5	5	5	24.9	24.9	24.9	28.845	0	286670000	11	4	5	4	5	7.93419	8.30261	n. def.	n. def.	Q91ZH2;Q542J9;P17918;A0A140T8V5;Q9CZD6	Q91ZH2;Q542J9;P17918;A0A140T8V5;Q9CZD6	Proliferating cell nuclear antigen	Pcna
n. def.	5.64585						4	4	4	9.6	9.6	9.6	79.381	0	12388000	4	0	4	0	4	n. def.	7.093	n. def.	n. def.	Q9CW46;A0A158RFV1;A0A1L1SRY4;Q9CW46-2	Q9CW46;A0A158RFV1;A0A1L1SRY4	Ribonucleoprotein PTB-binding 1	Raver1
n. def.	5.76741						1	1	1	5.2	5.2	5.2	32.039	0	6438700	1	0	1	0	1	n. def.	6.8088	n. def.	n. def.	Q05AF0;Q9WV03;A0A158SIT3	Q05AF0;Q9WV03;A0A158SIT3	Protein FAM50A	Fam50a
n. def.	n. def.						1	1	1	1.1	1.1	1.1	118.07	0	0	2	0	1	0	1	n. def.	n. def.	n. def.	n. def.	Q9DBD5;A0A158SIT8	Q9DBD5;A0A158SIT8	Proline-, glutamic acid- and leucine-rich protein 1	Pelp1
4.61613	3.76081						2	2	2	0.6	0.6	0.6	584.62	0	13513000	3	1	1	1	1	7.07401	6.21869	n. def.	n. def.	A0A171EBL2;E9Q555	A0A171EBL2;E9Q555	E3 ubiquitin-protein ligase RNF213	Rnf213
6.54494	7.63188				OLIG2		14	14	14	52.5	52.5	52.5	36.567	0	927000000	25	4	14	4	14	7.84597	8.93291	n. def.	n. def.	A0A171KXD3;Q9JIF0-3;Q8C2D7;Q80WB1;Q9JIF0-2;Q3UIG8;Q80WV6;Q9JIF0;Q3TPF5;A0A140LHF7;A0A140LJF4;Q9CX58;A0A140LJ70;A0A140LHS4;A0A140LIF7;A0A140LJ68;A0A140LI33;Q6PAK3	A0A171KXD3;Q9JIF0-3;Q8C2D7;Q80WB1;Q9JIF0-2;Q3UIG8;Q80WV6;Q9JIF0;Q3TPF5;A0A140LHF7;A0A140LJF4;Q9CX58;A0A140LJ70	Protein arginine N-methyltransferase 1	Prmt1
8.04199	8.52401						6	6	6	35.8	35.8	35.8	18.101	0	2666100000	16	5	6	5	6	8.82014	9.30216	n. def.	n. def.	A0A1B0GQU8;Q0QEW9;Q642K1;Q58EW0;P35980;A0A1B0GSS8;A0A1B0GSA8;A0A1B0GSF7;A0A1B0GRZ3;A0A1B0GS28	A0A1B0GQU8;Q0QEW9;Q642K1;Q58EW0;P35980;A0A1B0GSS8;A0A1B0GSA8;A0A1B0GSF7	60S ribosomal protein L18	Rpl18
n. def.	n. def.						1	1	1	12.7	12.7	12.7	17.504	0.00085251	0	1	0	1	0	1	n. def.	n. def.	n. def.	n. def.	A0A1B0GQW0;Q99JH8	A0A1B0GQW0;Q99JH8	ER lumen protein retaining receptor 1	Kdelr1
n. def.	5.76521						1	1	1	3.9	3.9	3.9	37.387	0.0077684	9900600	1	0	1	0	1	n. def.	6.99566	n. def.	n. def.	Q93092;A0A1B0GR11	Q93092;A0A1B0GR11	Transaldolase	Taldo1
n. def.	5.12535	+					1	1	1	6.6	6.6	6.6	22.832	1	1601600	0	0	1	0	1	n. def.	6.20455	50	65	A0A1B0GRK0	A0A1B0GRK0
n. def.	n. def.	+					1	1	1	46.4	46.4	46.4	6.1322	1	0	1	1	0	1	0	n. def.	n. def.	n. def.	n. def.	A0A1B0GT73;A0A1B0GRU7;Q499E5-3	A0A1B0GT73;A0A1B0GRU7;Q499E5-3
n. def.	4.9277						1	1	1	1.3	1.3	1.3	103.96	0.0047468	2709300	1	0	1	0	1	n. def.	6.43286	n. def.	n. def.	Q9R1C7-2;A0A1B0GRU8;Q9R1C7	Q9R1C7-2;A0A1B0GRU8;Q9R1C7	Pre-mRNA-processing factor 40 homolog A	Prpf40a
n. def.	5.76355				OLIG2;TCF4		1	1	1	2	2	2	69.654	0	17985000	2	0	1	0	1	n. def.	7.25491	n. def.	n. def.	Q3V1T0;P48379-2;Q8BYY2;P48379;G5E890;P48381;A0A1B0GRV3;Q8BJK3;P48377	Q3V1T0;P48379-2;Q8BYY2;P48379;G5E890;P48381;A0A1B0GRV3;Q8BJK3;P48377	DNA-binding protein RFX2;Transcription factor RFX3;MHC class II regulatory factor RFX1	Rfx3;Rfx2;Rfx1
n. def.	6.47048						4	4	4	19.6	19.6	19.6	37.778	0	53181000	5	0	4	0	4	n. def.	7.72576	n. def.	n. def.	Q9CQM9;A0A1B0GS58;A0A1B0GT04;A0A1B0GSD3	Q9CQM9;A0A1B0GS58;A0A1B0GT04	Glutaredoxin-3	Glrx3
7.98808	8.03543						1	1	1	1.8	1.8	1.8	61.409	0.0071378	5144800000	2	1	1	1	1	9.38602	9.43337	n. def.	n. def.	A0A1B0GSG3;Q6P2L6-4;Q6P2L6-2;D3Z197;Q6P2L6;D3Z357	A0A1B0GSG3;Q6P2L6-4;Q6P2L6-2;D3Z197;Q6P2L6;D3Z357	Histone-lysine N-methyltransferase NSD3	Whsc1l1
4.85463	6.64563						9	9	9	29.2	29.2	29.2	49.816	0	112340000	11	1	9	1	9	6.25259	8.04356	n. def.	n. def.	Q91VI7;Q3UM23;A0A1B0GSG5;A0A1B0GRG4;A0A1B0GRY7	Q91VI7;Q3UM23;A0A1B0GSG5	Ribonuclease inhibitor	Rnh1
n. def.	5.77866						3	3	3	4.6	4.6	4.6	81.5	0	25230000	3	0	3	0	3	n. def.	7.40192	n. def.	n. def.	A0A1B0GSI1;Q8BUR4-2;Q8BUR4	A0A1B0GSI1;Q8BUR4-2;Q8BUR4	Dedicator of cytokinesis protein 1	Dock1
7.07357	7.35719						10	10	9	34.6	34.6	30.8	34.599	0	588310000	17	7	9	6	8	8.30402	8.58763	n. def.	n. def.	A0A1B0GSR9;Q564E2;Q3TI99;P06151;Q3TCI7;Q3UDU4;A0A1B0GSX0;D3YZQ9;Q3THB4;A0A1B0GT41;A0A1B0GQX5;Q99K20;Q6NXW3;A0A1B0GSL7;Q3UIC3;A0A1B0GRC1;A0A1B0GRS2;A0A1B0GRW9;A0A1B0GS79;D3YVR7;D3YZE4;Q64483;Q548Z6;P00342;A0A1B0GSR2;A0A1B0GRE9	A0A1B0GSR9;Q564E2;Q3TI99;P06151;Q3TCI7;Q3UDU4;A0A1B0GSX0;D3YZQ9;Q3THB4;A0A1B0GT41;A0A1B0GQX5;Q99K20	L-lactate dehydrogenase;L-lactate dehydrogenase A chain	Ldha
n. def.	6.04021						1	1	1	7.4	7.4	7.4	20.229	0	6582100	2	1	1	1	1	n. def.	6.81836	n. def.	n. def.	Q9CWT9;D3Z0B9;Q571I9;A0A1B0GSU0	Q9CWT9;D3Z0B9;Q571I9;A0A1B0GSU0	Aldehyde dehydrogenase family 16 member A1	Aldh16a1
n. def.	n. def.	+					1	1	1	2.1	2.1	2.1	70.143	1	0	1	1	0	1	0	n. def.	n. def.	54	357	A0A1B0GSU8;Q3UWV9;A0A1B0GT78;Q3TKK8;Q7TMK6	A0A1B0GSU8;Q3UWV9;A0A1B0GT78;Q3TKK8;Q7TMK6	Protein Hook homolog 2	Hook2
n. def.	5.2188						1	1	1	8.7	8.7	8.7	18.128	0.0070822	662010	1	0	1	0	1	n. def.	5.82086	n. def.	n. def.	A0A1B0GT89;Q9QXV3-2;Q3ULE3;Q9QXV3	A0A1B0GT89;Q9QXV3-2;Q3ULE3;Q9QXV3	Inhibitor of growth protein 1	Ing1
n. def.	5.10353						1	1	1	2.5	2.5	2.5	76.623	0.00088731	4061600	1	0	1	0	1	n. def.	6.6087	n. def.	n. def.	A0A1B0GT92;Q9Z1E4	A0A1B0GT92;Q9Z1E4	Glycogen [starch] synthase, muscle	Gys1
n. def.	5.54417	+					1	1	1	4.2	4.2	4.2	40.799	1	7701800	0	0	1	0	1	n. def.	6.88659	55	206	B1ASN7;A0A1D5RLM8	B1ASN7;A0A1D5RLM8		Efcab3
n. def.	6.04618						3	3	3	6.6	6.6	6.6	69.48	0	27805000	4	0	3	0	3	n. def.	7.44412	n. def.	n. def.	Q9D2X5-2;Z4YNA3;Q9D2X5;A0A1D5RLR7;A0A1D5RLW7	Q9D2X5-2;Z4YNA3;Q9D2X5;A0A1D5RLR7;A0A1D5RLW7	MAU2 chromatid cohesion factor homolog	Mau2
n. def.	5.21091						1	1	1	3.5	3.5	3.5	51.483	0.0054054	4063100	0	0	1	0	1	n. def.	6.60886	n. def.	n. def.	A0A1D5RLY2;Q8C907;Q8CCX6;Q80WQ2	A0A1D5RLY2;Q8C907;Q8CCX6;Q80WQ2	Protein VAC14 homolog	Vac14
5.57228	n. def.						2	2	2	14.5	14.5	14.5	27.878	0	4855400	2	1	1	1	1	6.68623	n. def.	n. def.	n. def.	A0A1D5RM74;Q545V8;O54833;Q8CEL6;A0A1D5RM55;Q8CDH5;Q8BPF9	A0A1D5RM74;Q545V8;O54833;Q8CEL6;A0A1D5RM55;Q8CDH5;Q8BPF9	Casein kinase II subunit alpha	Csnk2a2
7.64091	7.88923						9	9	9	43.8	43.8	43.8	20.732	0	1091100000	20	9	7	9	7	8.59514	8.84347	n. def.	n. def.	P62717;A0A1D5RM85;A0A1D5RLW5;Q3THJ0;A0A1D5RM79;A0A1D5RME4;Q05CK2;A0A1D5RMC7	P62717;A0A1D5RM85;A0A1D5RLW5;Q3THJ0;A0A1D5RM79;A0A1D5RME4;Q05CK2	60S ribosomal protein L18a	Rpl18a
n. def.	5.50461						1	1	1	4.9	4.9	4.9	45.24	0.0089841	7670500	1	0	1	0	1	n. def.	6.88482	n. def.	n. def.	A0A1D5RMC1;A0A1D5RM94;Q6PDL0	A0A1D5RMC1;A0A1D5RM94;Q6PDL0	Cytoplasmic dynein 1 light intermediate chain 2	Dync1li2
6.26656	n. def.	+					1	1	1	3.6	3.6	3.6	38.381	1	27711000	1	1	0	1	0	7.44265	n. def.	420	112	D6RI50;A2AAE1-5;A0A1D5RMC4;A2AAE1-6;A2AAE1;A2AAE1-2;A2AAE1-3	D6RI50;A2AAE1-5;A0A1D5RMC4;A2AAE1-6;A2AAE1;A2AAE1-2;A2AAE1-3	Uncharacterized protein KIAA1109	4932438A13Rik;Kiaa1109
n. def.	5.07682				OLIG2		2	2	2	0.9	0.9	0.9	260.95	0.00084818	14203000	2	0	2	0	2	n. def.	7.15238	n. def.	n. def.	B7ZWL1;B2RXR3;A0A1D5RMJ8;Q6ZQ08-2;Q6ZQ08;Q6ZQ08-4;A0A1D5RM04;Q6ZQ08-3	B7ZWL1;B2RXR3;A0A1D5RMJ8;Q6ZQ08-2;Q6ZQ08;Q6ZQ08-4;A0A1D5RM04;Q6ZQ08-3	CCR4-NOT transcription complex subunit 1	Cnot1
5.67928	6.48015				OLIG2		6	6	6	15.3	15.3	15.3	65.434	0	129460000	10	3	6	3	6	7.24748	8.04836	n. def.	n. def.	A0A1I7Q4G8;Q8CHY6;E9QMN5	A0A1I7Q4G8;Q8CHY6;E9QMN5	Transcriptional repressor p66 alpha	Gatad2a
7.23462	7.05952						3	3	3	28	28	28	10.309	0	143170000	3	1	2	1	2	7.93358	7.7585	n. def.	n. def.	A0A1L1SQA8;Q58EA6;P62852	A0A1L1SQA8;Q58EA6;P62852	40S ribosomal protein S25	Rps25
n. def.	4.55478	+					1	1	1	0.2	0.2	0.2	564.89	1	8932700	0	0	1	0	1	n. def.	6.95098	56	3357	K3W4M2;E9PZQ0;A0A1L1SQG7	K3W4M2;E9PZQ0;A0A1L1SQG7	Ryanodine receptor 1	Ryr1
6.22097	n. def.	+					1	1	1	5.2	5.2	5.2	48.107	1	24950000	0	1	0	1	0	7.39707	n. def.	57	31	A0A1L1SRI6;A0A1L1SS48;Q45VK7;Q45VK7-2	A0A1L1SRI6;A0A1L1SS48;Q45VK7;Q45VK7-2	Cytoplasmic dynein 2 heavy chain 1	Dync2h1
n. def.	5.98908	+					1	1	1	9	9	9	10.557	1	6826200	1	0	1	0	1	n. def.	6.83418	58	95	A0A1L1SRJ0	A0A1L1SRJ0
5.69626	6.02301						1	1	1	10	10	10	18.081	0.003962	15513000	2	1	1	1	1	6.69626	7.02301	n. def.	n. def.	A0A1L1SU24;A0A1L1STN5;A0A1L1SRY8;A0A1L1SSY9;Q9DCU6	A0A1L1SU24;A0A1L1STN5;A0A1L1SRY8;A0A1L1SSY9;Q9DCU6	39S ribosomal protein L4, mitochondrial	Mrpl4
5.26673	6.20957						3	3	3	4.1	4.1	4.1	76.347	0	61371000	5	2	3	2	3	6.7982	7.74105	n. def.	n. def.	Q45VK5;Q9Z1X4-2;Q45VK6;Q9Z1X4;A0A1L1STE4;Q9Z1X4-3;Q3UD30;A0A1L1SQR7;Q8C5B7;Q91WM1-2;Q91WM1	Q45VK5;Q9Z1X4-2;Q45VK6;Q9Z1X4;A0A1L1STE4;Q9Z1X4-3;Q3UD30	Interleukin enhancer-binding factor 3	Ilf3
n. def.	5.15339						2	2	2	4.8	4.8	4.8	82.047	0.00089047	6548700	1	0	2	0	2	n. def.	6.81616	n. def.	n. def.	A0A1L1SU97;Q6P9L6	A0A1L1SU97;Q6P9L6	Kinesin-like protein KIF15	Kif15
n. def.	5.49472						1	1	1	8.7	8.7	8.7	23.309	0.00087184	4373800	1	0	1	0	1	n. def.	6.64086	n. def.	n. def.	D3Z0L8;A1BN54;Q7TPR4;Q1A602;Q3ULT2;Q3UDJ7;P57780;A0A1L1SV25	D3Z0L8;A1BN54;Q7TPR4;Q1A602;Q3ULT2;Q3UDJ7;P57780;A0A1L1SV25	Alpha-actinin-1;Alpha-actinin-4	Actn4;Actn1
5.40567	6.07719						5	5	5	14.7	14.7	14.7	56.55	0	36226000	6	1	4	1	4	6.80361	7.47515	n. def.	n. def.	P62814;A0A1S6GWG6;Q99KA3;Q6P6I3;Q91YH6;Q8C3L6;B0LAC8;A0A0U1RNU9	P62814;A0A1S6GWG6;Q99KA3;Q6P6I3;Q91YH6;Q8C3L6	V-type proton ATPase subunit B, brain isoform	Atp6v1b2;Atp6v1b1
5.90142	6.39127						8	8	8	29.3	29.3	29.3	45.626	0	78211000	10	3	7	3	7	7.28162	7.77148	n. def.	n. def.	P62196;A0A1S6GWH1;Q8K1K2;Q99KR1	P62196;A0A1S6GWH1;Q8K1K2;Q99KR1	26S protease regulatory subunit 8	Psmc5
6.72189	7.20409						14	14	4	38.1	38.1	13.6	49.035	0	404130000	19	6	12	0	4	8.00065	8.48285	n. def.	n. def.	Q9Z1N5;A0A1S6GWH2;Q3TB18;G3UXI6	Q9Z1N5;A0A1S6GWH2;Q3TB18	Spliceosome RNA helicase Ddx39b	Ddx39b
n. def.	5.03242						3	3	3	1.4	1.4	1.4	529.32	0	20688000	3	0	3	0	3	n. def.	7.31572	n. def.	n. def.	S4R1L5;O88738-3;S4R2P8;O88738-2;O88738;A0A1S6GWH3;A0A1S6GWH6;S4R1S3	S4R1L5;O88738-3;S4R2P8;O88738-2;O88738;A0A1S6GWH3;A0A1S6GWH6	Baculoviral IAP repeat-containing protein 6	Birc6
4.8652	n. def.						4	4	4	7.2	7.2	7.2	77.746	0	2786000	4	3	1	3	1	6.44498	n. def.	n. def.	n. def.	Q1HFZ0-2;H3BKN0;Q1HFZ0;A0A1S6GWH4	Q1HFZ0-2;H3BKN0;Q1HFZ0;A0A1S6GWH4	tRNA (cytosine(34)-C(5))-methyltransferase	Nsun2
5.71617	6.2356						8	8	8	12.5	12.5	12.5	117.81	0	120990000	21	6	8	6	8	7.44857	7.96801	n. def.	n. def.	Q02053;B9EHN0;A0A1S6GWH5	Q02053;B9EHN0;A0A1S6GWH5	Ubiquitin-like modifier-activating enzyme 1	Uba1
4.74014	5.10534						2	2	2	4.3	4.3	4.3	69.819	0.0054602	7661600	2	1	1	1	1	6.36339	6.72858	n. def.	n. def.	Q91VN6;Q3UAC4;A0A1S6GWJ4;Q3TI21	Q91VN6;Q3UAC4;A0A1S6GWJ4;Q3TI21	Probable ATP-dependent RNA helicase DDX41	Ddx41
5.36355	5.86777						2	2	2	2.8	2.8	2.8	80.53	0.0024752	28086000	3	2	1	2	1	6.82596	7.33017	n. def.	n. def.	Q8BMP9;Q5U412;Q3UA28;Q3U9H4;Q3U573;Q3TVN9;Q3TUR1;Q3TG02;P46978;Q3U547;A0A1S6GWK0;D3YZN5	Q8BMP9;Q5U412;Q3UA28;Q3U9H4;Q3U573;Q3TVN9;Q3TUR1;Q3TG02;P46978;Q3U547;A0A1S6GWK0;D3YZN5	Dolichyl-diphosphooligosaccharide--protein glycosyltransferase subunit STT3A	Stt3a
5.90407	6.45054						2	2	2	18	18	18	15.448	0	32614000	3	1	2	1	2	6.85831	7.4048	n. def.	n. def.	A0A1W2P6G5;Q642K0;Q60605-2;Q60605;A0A1W2P6F6;A0A1W2P7Q9;Q3TIG9	A0A1W2P6G5;Q642K0;Q60605-2;Q60605;A0A1W2P6F6;A0A1W2P7Q9;Q3TIG9	Myosin light polypeptide 6	Myl6
6.44372	n. def.						3	3	3	19	19	19	16.4	0	25001000	3	3	0	3	0	7.39796	n. def.	n. def.	n. def.	A0A1W2P6N2;B7ZWI2;Q9D1J3;B2RXM7;A0A1W2P7G2	A0A1W2P6N2;B7ZWI2;Q9D1J3;B2RXM7;A0A1W2P7G2	SAP domain-containing ribonucleoprotein	Sarnp
n. def.	4.87151						2	2	2	1.4	1.4	1.4	223.68	0.0054645	8182900	1	0	2	0	2	n. def.	6.91291	n. def.	n. def.	P48725-2;P48725-3;P48725;A0A1W2P737;F8VPV0;Q3TQR8;Q3ULT7;Q497U2;Q8CDL2;Q80U10	P48725-2;P48725-3;P48725;A0A1W2P737;F8VPV0;Q3TQR8;Q3ULT7;Q497U2;Q8CDL2;Q80U10	Pericentrin	Pcnt
n. def.	5.52359						1	1	1	2.8	2.8	2.8	57.918	0	9014700	1	0	1	0	1	n. def.	6.95495	n. def.	n. def.	A0A1W2P750;Q9DBR7-2;Q9DBR7	A0A1W2P750;Q9DBR7-2;Q9DBR7	Protein phosphatase 1 regulatory subunit 12A	Ppp1r12a
9.10731	9.25498						5	1	1	38.3	24.1	24.1	15.029	0	12317000000	22	5	4	1	1	9.70938	9.85705	n. def.	n. def.	A1L0U3;P84228;B9EI85;A0A1W2P768;F8WI35	A1L0U3;P84228;B9EI85;A0A1W2P768;F8WI35	Histone H3;Histone H3.2	Hist1h3e;Hist1h3b;Hist2h3b;H3f3a
n. def.	5.7571	+				+	1	1	1	3.1	3.1	3.1	99.954	1	25151000	1	0	1	0	1	n. def.	7.40056	59	865	A0A1W2P7C1;P70365-4;P70365-2;P70365-3;P70365	A0A1W2P7C1;P70365-4;P70365-2;P70365-3;P70365	Nuclear receptor coactivator 1	Ncoa1
n. def.	n. def.	+					1	1	1	28.6	28.6	28.6	5.3711	1	0	1	0	1	0	1	n. def.	n. def.	n. def.	n. def.	A0A1W2P7F0;Q99LQ1	A0A1W2P7F0;Q99LQ1	MAP3K12-binding inhibitory protein 1	Mbip
6.65632	7.14616						3	3	3	46.5	46.5	46.5	8.2033	0	74134000	3	1	3	1	3	7.25837	7.74823	n. def.	n. def.	A0A1W2P7H9;A0A1W2P7T3;Q4FZH7;P84089;G3UW85	A0A1W2P7H9;A0A1W2P7T3;Q4FZH7;P84089	Enhancer of rudimentary homolog	Erh
n. def.	6.68783						2	2	2	23.7	23.7	23.7	12.562	0.00088574	24367000	2	0	2	0	2	n. def.	7.3868	n. def.	n. def.	A0A1W2P7X3;Q9D358;Q4VAI2;Q9D358-2;Q561M1	A0A1W2P7X3;Q9D358;Q4VAI2;Q9D358-2;Q561M1	Low molecular weight phosphotyrosine protein phosphatase	Acp1
n. def.	5.41895						1	1	1	5.1	5.1	5.1	52.185	0	7609300	3	0	1	0	1	n. def.	6.88134	n. def.	n. def.	A0JLN6;Q8CE86;Q8C4J7	A0JLN6;Q8CE86;Q8C4J7	Transducin beta-like protein 3	Tbl3
n. def.	5.40226						2	2	2	7.3	7.3	7.3	44.806	0	6565000	2	0	2	0	2	n. def.	6.81723	n. def.	n. def.	Q8BNM3;Q8BFV2;A0JLQ7	Q8BNM3;Q8BFV2;A0JLQ7	PCI domain-containing protein 2	Pcid2
9.14774	9.32397						13	13	13	69.1	69.1	69.1	13.579	0	24595000000	44	10	11	10	11	9.99282	10.1691	n. def.	n. def.	A0JLV3;Q8CGP2;Q8CGP1;Q64475;P10853;B2RVD5;Q8CBB6;Q921L4;Q8CGP2-2;Q6ZWY9;Q64525;Q64478;P10854;B2RTK3;P70696;A0JNS9;Q9D2U9;Q8CGP0;Q8VEE3;Q64524;Q8C622	A0JLV3;Q8CGP2;Q8CGP1;Q64475;P10853;B2RVD5;Q8CBB6;Q921L4;Q8CGP2-2;Q6ZWY9;Q64525;Q64478;P10854;B2RTK3;P70696;A0JNS9;Q9D2U9;Q8CGP0	Histone H2B;Histone H2B type 1-P;Histone H2B type 1-K;Histone H2B type 1-B;Histone H2B type 1-F/J/L;Histone H2B type 1-C/E/G;Histone H2B type 2-B;Histone H2B type 1-H;Histone H2B type 1-M;Histone H2B type 1-A;Histone H2B type 3-A;Histone H2B type 3-B	Hist1h2bj;Hist1h2bp;Hist1h2bk;Hist1h2bb;Hist1h2bf;Gm13646;Hist1h2bc;Hist2h2bb;Hist1h2bh;Hist1h2bm;Hist1h2ba;Hist3h2ba;Hist3h2bb
n. def.	n. def.	+					1	1	1	3.5	3.5	3.5	28.479	1	0	1	1	0	1	0	n. def.	n. def.	65	172	A0JNR5	A0JNR5		Olfr1340
n. def.	4.77048						2	2	2	3	3	3	97.893	0	2829600	2	0	2	0	2	n. def.	6.45173	n. def.	n. def.	Q62448-2;Q62448;A0JNY7;Q3URI0;Q3U9U9;F7CBP1;G3XA17	Q62448-2;Q62448;A0JNY7;Q3URI0;Q3U9U9;F7CBP1;G3XA17	Eukaryotic translation initiation factor 4 gamma 2	Eif4g2
6.99064	7.42451						11	3	3	22.7	6.5	6.5	65.893	0	1054600000	17	5	10	2	3	8.45303	8.88691	n. def.	n. def.	A0PJ91;Q80Y52;Q3TKA2;P07901;Q3TKB9;Q3TKG0;Q3UIF3;Q3TJU7;Q8C5U3;Q8C2A9	A0PJ91;Q80Y52;Q3TKA2;P07901;Q3TKB9;Q3TKG0;Q3UIF3;Q3TJU7;Q8C5U3	Heat shock protein HSP 90-alpha	Hsp90aa1
n. def.	5.83639	+					2	1	1	12.6	6.8	6.8	24.077	1	6174900	1	0	2	0	1	n. def.	6.79063	66	63	A0PJ98;Q3UZJ4;Q61151	A0PJ98;Q3UZJ4;Q61151	Serine/threonine-protein phosphatase 2A 56 kDa regulatory subunit epsilon isoform	Ppp2r5e
6.99984	4.68725						2	2	2	2.6	2.6	2.6	164.56	0	984400000	2	1	1	1	1	8.99106	6.67848	n. def.	n. def.	A0PJF4;Q6UL10;E9Q616;Q8BKS2;Q8VDN3;A0JLR7;Q61484	A0PJF4;Q6UL10;E9Q616;Q8BKS2;Q8VDN3;A0JLR7;Q61484		Ahnak
n. def.	n. def.	+					1	1	1	2.1	2.1	2.1	77.295	1	0	1	0	1	0	1	n. def.	n. def.	n. def.	n. def.	A0PJL3;Q6PDS3-2;Q6PDS3;Q6PDS3-3	A0PJL3;Q6PDS3-2;Q6PDS3;Q6PDS3-3	Sterile alpha and TIR motif-containing protein 1	Sarm1
n. def.	6.35862	+					1	1	1	3.3	3.3	3.3	33.943	1	22836000	1	0	1	0	1	n. def.	7.35862	421	110	Q8VHG3;G3X9U1;A0PK85	Q8VHG3;G3X9U1;A0PK85		Obox6
n. def.	6.53162						1	1	1	19.4	19.4	19.4	10.242	0	10203000	1	0	1	0	1	n. def.	7.00873	n. def.	n. def.	Q5EBK8;Q9DAS3;P51807;A1E5T5	Q5EBK8;Q9DAS3;P51807;A1E5T5	Dynein light chain Tctex-type 1	Dynlt1b;Dynlt1f;Dynlt1;Dynlt1c
5.24756	4.88753						5	5	5	1.8	1.8	1.8	405.82	0	47246000	6	4	2	4	2	7.51706	7.15703	n. def.	n. def.	Q8BX70-2;Q8BX70-3;Q8BX70;A1ILG8;A0A1L1SS63;A1ILH2;A0A1L1SSJ3;A1ILH3	Q8BX70-2;Q8BX70-3;Q8BX70;A1ILG8;A0A1L1SS63	Vacuolar protein sorting-associated protein 13C	Vps13c
n. def.	4.65284						3	3	3	2.8	2.8	2.8	128.78	0	2742600	2	0	3	0	3	n. def.	6.43816	n. def.	n. def.	P28660;A1L0U6;A2AS98;P28660-2	P28660;A1L0U6;A2AS98;P28660-2	Nck-associated protein 1	Nckap1
9.10415	9.25717						5	5	1	37.8	37.8	23.7	15.273	0	12315000000	25	5	4	1	1	9.70619	9.85922	n. def.	n. def.	A1L0V4;P68433	A1L0V4;P68433	Histone H3;Histone H3.1	Hist1h3i;Hist1h3a
n. def.	5.42622						1	1	1	7.9	7.9	7.9	27.981	0	3201900	1	0	1	0	1	n. def.	6.50541	n. def.	n. def.	Q3TEK4;A4QMY9;A1L0V7;Q99K95;Q4V9T7;Q3TDK9	Q3TEK4;A4QMY9;A1L0V7;Q99K95;Q4V9T7;Q3TDK9	Protein RTF2 homolog	Rtfdc1
n. def.	n. def.						1	1	1	1.3	1.3	1.3	111.29	0	0	1	0	1	0	1	n. def.	n. def.	n. def.	n. def.	Q8C7X2-2;Z4YJW0;Q8C7X2;A1L2Z3	Q8C7X2-2;Z4YJW0;Q8C7X2;A1L2Z3	ER membrane protein complex subunit 1	Emc1
n. def.	5.57655						2	2	2	3.1	3.1	3.1	72.082	0	9806800	3	0	2	0	2	n. def.	6.99153	n. def.	n. def.	Q61550;Q3TG35;A1L367;A1L366;R4GML2;A2AU37;Q3UTE4	Q61550;Q3TG35;A1L367;A1L366;R4GML2;A2AU37;Q3UTE4	Double-strand-break repair protein rad21 homolog;Double-strand-break repair protein rad21-like protein 1	Rad21;Rad21l;Rad21l1
5.71204	6.4742						4	4	4	19.6	19.6	19.6	36.539	0	52428000	6	2	4	2	4	6.88814	7.6503	n. def.	n. def.	P26516;A1L3B8	P26516;A1L3B8	26S proteasome non-ATPase regulatory subunit 7	Psmd7
6.39317	6.77833				OLIG2		12	12	12	32.7	32.7	32.7	63.638	0	245780000	20	7	10	7	10	7.85557	8.24072	n. def.	n. def.	A1L3S7;Q8VHR5;Q69ZQ5;Q8VHR5-2;A0A0U1RNM2;Q6PAH8	A1L3S7;Q8VHR5;Q69ZQ5;Q8VHR5-2;A0A0U1RNM2	Transcriptional repressor p66-beta	Gatad2b
n. def.	5.27353	+					1	1	1	1.3	1.3	1.3	99.465	1	6195200	0	0	1	0	1	n. def.	6.79206	69	496	Q68EF9;Q6NZL8-3;Q6NZL8-2;A2A442;Q6NZL8	Q68EF9;Q6NZL8-3;Q6NZL8-2;A2A442;Q6NZL8	Signal peptide, CUB and EGF-like domain-containing protein 1	Scube1
n. def.	5.61379						1	1	1	10.5	10.5	10.5	12.908	0.00085763	3287600	1	0	1	0	1	n. def.	6.51688	n. def.	n. def.	Q3TUJ5;Q3UZ68;Q2M4I9;A2A4A6;Q62077	Q3TUJ5;Q3UZ68;Q2M4I9;A2A4A6;Q62077	1-phosphatidylinositol 4,5-bisphosphate phosphodiesterase gamma-1	Plcg1
7.3719	7.67972						6	6	6	23.2	23.2	23.2	23.247	0	428260000	11	4	5	4	5	8.15005	8.45787	n. def.	n. def.	A2A547;Q5I0T8;P84099	A2A547;Q5I0T8;P84099	Ribosomal protein L19;60S ribosomal protein L19	Rpl19
n. def.	6.48732	+					1	1	1	9.2	9.2	9.2	15.446	1	18428000	1	0	1	0	1	n. def.	7.26548	70	108	A2A550	A2A550		Fbxl20
6.92016	6.74909						6	4	4	25.8	18.4	18.4	27.854	0	195050000	13	5	4	3	3	8.06629	7.89521	n. def.	n. def.	Q9CQV8-2;Q9CQV8;A2A5N2;A2A5N1	Q9CQV8-2;Q9CQV8;A2A5N2;A2A5N1	14-3-3 protein beta/alpha;14-3-3 protein beta/alpha, N-terminally processed	Ywhab
n. def.	4.98804						2	2	2	6.6	6.6	6.6	53.815	0.0039809	2918500	2	0	2	0	2	n. def.	6.46516	n. def.	n. def.	Q3U7A6;A2A5R8;Q9DBE7;Q3U8D3;A2A5S3;Q3TWP5;Q641P2;Q3TJ07;Q3UTC8;Q3TU43;Q3TWA1;Q3UKX3;V9GX87;Q6TNG5;Q9Z108	Q3U7A6;A2A5R8;Q9DBE7;Q3U8D3;A2A5S3;Q3TWP5;Q641P2;Q3TJ07;Q3UTC8;Q3TU43;Q3TWA1;Q3UKX3;V9GX87;Q6TNG5;Q9Z108	Double-stranded RNA-binding protein Staufen homolog 1	Stau1
6.30049	6.64154						4	4	4	41.1	41.1	41.1	15.153	0	57404000	8	3	3	3	3	7.25474	7.59578	n. def.	n. def.	A2A6G9;A2A6H0;Q61792;Q543N3;A2A6G6;A2A6G7;A2A6G8;A2A6H1;A2A6G5;E9Q0N6;A2A6G4	A2A6G9;A2A6H0;Q61792;Q543N3;A2A6G6;A2A6G7;A2A6G8;A2A6H1;A2A6G5;E9Q0N6	LIM and SH3 domain protein 1	Lasp1
6.31378	6.74821						13	13	13	29.4	29.4	29.4	63.772	0	306400000	19	6	12	6	12	7.91584	8.35027	n. def.	n. def.	A2A6U3;Q80UG5-3;Q80UG5;Q80UG5-2;Q3TDR9;A2A6U5;A8Y5D3	A2A6U3;Q80UG5-3;Q80UG5;Q80UG5-2;Q3TDR9	Septin-9	2009-09-01
n. def.	5.92731						7	7	7	5.9	5.9	5.9	172.44	0	59212000	7	0	7	0	7	n. def.	7.77241	n. def.	n. def.	A2A791;A2A791-2;F6VYE2	A2A791;A2A791-2;F6VYE2	Zinc finger MYM-type protein 4	Zmym4
n. def.	5.42504						2	2	2	5.1	5.1	5.1	59.105	0	10112000	2	0	2	0	2	n. def.	7.00484	n. def.	n. def.	Q91WQ3;A2A7S7	Q91WQ3;A2A7S7	Tyrosine--tRNA ligase, cytoplasmic;Tyrosine--tRNA ligase, cytoplasmic, N-terminally processed	Yars
n. def.	n. def.						1	1	1	21.9	21.9	21.9	7.9284	0.00084034	0	1	0	1	0	1	n. def.	n. def.	n. def.	n. def.	D3K2X3;A2A817;A2A816;A2A815;A2A813;Q99LX0	D3K2X3;A2A817;A2A816;A2A815;A2A813;Q99LX0	Protein DJ-1	Park7
n. def.	5.07943						2	2	2	2.3	2.3	2.3	115.96	0.00089286	5043100	2	0	2	0	2	n. def.	6.7027	n. def.	n. def.	Q8BW72-2;A2A8L9;Q8BW72	Q8BW72-2;A2A8L9;Q8BW72	Lysine-specific demethylase 4A	Kdm4a
5.24775	n. def.						1	1	1	6.9	6.9	6.9	25.66	0.00083963	884570	1	1	0	1	0	5.94673	n. def.	n. def.	n. def.	Q8C9U2;Q3TXY3;A2A8U2-2;A2A8U2-3;A2A8U2	Q8C9U2;Q3TXY3;A2A8U2-2;A2A8U2-3;A2A8U2	Transmembrane protein 201	Tmem201
n. def.	7.15424						2	2	2	6	6	6	56.856	0.0096618	399400000	2	0	2	0	2	n. def.	8.60141	n. def.	n. def.	Q8R1H1;A6PWC3;Q8R320;Q8BHG1;A2A9Q2	Q8R1H1;A6PWC3;Q8R320;Q8BHG1;A2A9Q2	Nardilysin	Nrd1
5.27795	n. def.						1	1	1	3.1	3.1	3.1	39.269	0.0059172	3224000	1	1	0	1	0	6.5084	n. def.	n. def.	n. def.	A2A9S3;Q61701-2;A2A9S2;A2A9R8;Q9CXQ0;A2A9R6;Q8BVA9;A2A9S0;Q61701;Q80XH9	A2A9S3;Q61701-2;A2A9S2;A2A9R8;Q9CXQ0;A2A9R6;Q8BVA9;A2A9S0;Q61701;Q80XH9	ELAV-like protein 4	Elavl4
5.25957	5.07682						4	4	4	10.1	10.1	10.1	65.952	0	10239000	5	2	3	2	3	6.79105	6.60831	n. def.	n. def.	A2AAN2;Q8BMA6;Q8K258	A2AAN2;Q8BMA6;Q8K258	Signal recognition particle subunit SRP68	Srp68
5.39037	n. def.						2	2	2	3.7	3.7	3.7	101.5	0	10810000	4	2	0	2	0	7.03383	n. def.	n. def.	n. def.	B9EJ37;A2AAY5	B9EJ37;A2AAY5	SH3 and PX domain-containing protein 2B	Sh3pxd2b
6.22225	6.48735						3	3	3	10.5	10.5	10.5	66.301	0	118490000	9	3	3	3	3	7.62018	7.88529	n. def.	n. def.	Q61833;A2ACG7;Q9DBG6;Q3U505	Q61833;A2ACG7;Q9DBG6;Q3U505	Dolichyl-diphosphooligosaccharide--protein glycosyltransferase subunit 2	Rpn2
5.48793	5.64981						1	1	1	2.5	2.5	2.5	56.877	0.00326	20359000	2	1	1	1	1	6.91929	7.08117	n. def.	n. def.	Q8CBI2;Q3UR39;A2AD03;Q9QXG2	Q8CBI2;Q3UR39;A2AD03;Q9QXG2	Rab proteins geranylgeranyltransferase component A 1	Chm
5.33479	5.12785						2	2	2	10.8	10.8	10.8	22.587	0.0054902	4905600	2	1	1	1	1	6.48091	6.274	n. def.	n. def.	F6WHQ7;P10649;A2AE89;F6Y363;D3YZ29;E9PV63;D3YVP6;D3YX76;A2AE91;E9QAC8;D3YVP5;E9PVM7;Q8R5I6;Q80W21;Q6PJ91;P15626;P48774	F6WHQ7;P10649;A2AE89;F6Y363;D3YZ29;E9PV63;D3YVP6;D3YX76;A2AE91;E9QAC8;D3YVP5;E9PVM7;Q8R5I6;Q80W21;Q6PJ91;P15626;P48774	Glutathione S-transferase Mu 1;Glutathione S-transferase Mu 7;Glutathione S-transferase Mu 2;Glutathione S-transferase Mu 5	Gstm1;Gm6665;Gstm7;Gstm5;Gstm2;Gstm4
n. def.	5.98711						1	1	1	9.5	9.5	9.5	30.597	0.0057971	9707600	2	0	1	0	1	n. def.	6.98711	n. def.	n. def.	Q91VJ5;A2AER7	Q91VJ5;A2AER7	Polyglutamine-binding protein 1	Pqbp1
5.21495	6.86146						5	5	5	24.3	24.3	24.3	31.888	0	111490000	7	1	5	1	5	6.39104	8.03755	n. def.	n. def.	P97447;A2AEX8;A2AEX6;A2AEY1;A2AEY2;P97447-2;A2AEX7;A2AEY0	P97447;A2AEX8;A2AEX6;A2AEY1;A2AEY2;P97447-2;A2AEX7	Four and a half LIM domains protein 1	Fhl1
n. def.	5.80393						3	3	3	3.2	3.2	3.2	141.28	0	39475000	2	0	3	0	3	n. def.	7.59632	n. def.	n. def.	O35638;A2AFF6;D6REF2;Q3TG33;Q8C818;F8WHU7;Q9D3E6	O35638;A2AFF6	Cohesin subunit SA-2	Stag2
5.19086	4.35307						2	2	2	1.2	1.2	1.2	369.7	0	24705000	2	1	1	1	1	7.33387	6.49609	n. def.	n. def.	Q7TMY8-2;Q7TMY8-4;Q7TMY8-3;Q7TMY8;Q4JG03;A2AFQ0;Q3TMX4;Q8C0G8;Q3TNP1;Q8BKX3	Q7TMY8-2;Q7TMY8-4;Q7TMY8-3;Q7TMY8;Q4JG03;A2AFQ0;Q3TMX4;Q8C0G8;Q3TNP1;Q8BKX3	E3 ubiquitin-protein ligase HUWE1	Huwe1
6.17155	6.30281						3	3	3	10.2	10.2	10.2	40.163	0	52389000	5	3	2	3	2	7.34764	7.4789	n. def.	n. def.	A2AFS0;Q3U8N1;Q3U6F6;P26638;Q8C483;A2AFS1;Q8CEH3	A2AFS0;Q3U8N1;Q3U6F6;P26638;Q8C483;A2AFS1	Serine--tRNA ligase, cytoplasmic	Sars
n. def.	5.6765						1	1	1	11	11	11	14.88	0	3798300	2	0	1	0	1	n. def.	6.57959	n. def.	n. def.	A2AGS0;A2AGS1;Q8CH72;Q3TLR3	A2AGS0;A2AGS1;Q8CH72;Q3TLR3	E3 ubiquitin-protein ligase TRIM32	Trim32
n. def.	6.90427						3	3	3	29.9	29.9	29.9	9.5972	0	40109000	4	1	2	1	2	n. def.	7.60324	n. def.	n. def.	A2AGS6;Q4QQM4	A2AGS6;Q4QQM4	Tumor protein p53-inducible protein 11	Trp53i11
6.1506	6.60938						8	7	7	10.5	9.5	9.5	109.3	0	279610000	14	4	7	3	6	7.85818	8.31696	n. def.	n. def.	Q7TMX4;Q543F1;Q3U5Q3;Q3TMY8;O08810;A2AH85;Q6A0E3;G3UZ34;G3UXK8	Q7TMX4;Q543F1;Q3U5Q3;Q3TMY8;O08810;A2AH85;Q6A0E3;G3UZ34	116 kDa U5 small nuclear ribonucleoprotein component	Eftud2
n. def.	4.96982						1	1	1	1.8	1.8	1.8	86.696	0.0058055	3358300	2	0	1	0	1	n. def.	6.52612	n. def.	n. def.	Q8K000;Q80U43;F7BPW6;Q811L5;E9QAT4;A2AIX1	Q8K000;Q80U43;F7BPW6;Q811L5;E9QAT4;A2AIX1		Sec16a
5.68071	6.32395						5	5	5	12.3	12.3	12.3	61.447	0	82810000	5	2	5	2	5	7.18585	7.8291	n. def.	n. def.	A2AJ72;Q3ULP9;Q3TIX6;A0A0A6YVV5;A0A0A6YY39;A0A0A6YX76;A2AJ71;F7AM43	A2AJ72;Q3ULP9;Q3TIX6;A0A0A6YVV5		Fubp3
n. def.	4.97166				OLIG2		3	3	3	1.4	1.4	1.4	334.06	0	12273000	2	0	3	0	3	n. def.	7.08895	n. def.	n. def.	A2AJK6;A2AJK6-3	A2AJK6;A2AJK6-3	Chromodomain-helicase-DNA-binding protein 7	Chd7
5.20833	6.13072						3	3	3	13.1	13.1	13.1	32.77	0	18153000	4	1	3	1	3	6.28751	7.20989	n. def.	n. def.	A2AKU9;Q8C2Q8;Q9ERA8;Q9D9D7;Q91VR2;Q3UD06;A2AKV0;A2AKV1;A2AKV2;A2AKV3	A2AKU9;Q8C2Q8;Q9ERA8;Q9D9D7;Q91VR2;Q3UD06	ATP synthase subunit gamma;ATP synthase subunit gamma, mitochondrial	Atp5c1
7.57836	7.959						19	19	3	61.3	61.3	10.1	34.376	0	2061900000	65	19	18	3	3	8.78249	9.16313	n. def.	n. def.	Q6P6I7;A2AL12;Q8BG05;Q5FB19;Q3UZG3;Q5U3M2;Q58E39;A2AL13;V9GX38	Q6P6I7;A2AL12;Q8BG05;Q5FB19;Q3UZG3;Q5U3M2	Heterogeneous nuclear ribonucleoprotein A3	Hnrnpa3
n. def.	4.54506						2	2	2	2.7	2.7	2.7	118.77	0	1894300	2	0	2	0	2	n. def.	6.27745	n. def.	n. def.	A2ALR9;Q3V0C5;Q3V0C5-5;Q3V0C5-2;A2ALR5;B7ZNK5;Q3V0C5-4;Q3V0C5-3;A2ALR8	A2ALR9;Q3V0C5;Q3V0C5-5;Q3V0C5-2;A2ALR5;B7ZNK5;Q3V0C5-4;Q3V0C5-3;A2ALR8	Ubiquitin carboxyl-terminal hydrolase 48	Usp48
7.31471	7.52771						8	8	8	40.2	40.2	40.2	24.604	0	434770000	16	4	7	4	7	8.2178	8.4308	n. def.	n. def.	Q6ZWV3;Q3THJ6;A2AM97;I7HLV2;P86048;A0A1B0GXC3;B7FAU6;O89059	Q6ZWV3;Q3THJ6;A2AM97;I7HLV2;P86048;A0A1B0GXC3;B7FAU6;O89059	60S ribosomal protein L10;60S ribosomal protein L10-like	Rpl10;Rpl10l
5.40528	5.76011						2	2	2	16.4	16.4	16.4	27.417	0	13277000	3	1	1	1	1	6.60939	6.96422	n. def.	n. def.	A2AMV1;Q9D0I8;A2AMU9;D6RCI7;Q9QYY3	A2AMV1;Q9D0I8;A2AMU9;D6RCI7;Q9QYY3	mRNA turnover protein 4 homolog	Mrto4;2610012O22Rik
n. def.	6.03298						2	2	2	11.5	11.5	11.5	29.196	0	16184000	3	1	2	1	2	n. def.	7.20909	n. def.	n. def.	Q3TRH8;A2AMW0;Q923G3;P47757-2;P47757;P47757-4;F7CAZ6;Q3TVK4	Q3TRH8;A2AMW0;Q923G3;P47757-2;P47757;P47757-4;F7CAZ6;Q3TVK4	F-actin-capping protein subunit beta	Capzb
n. def.	4.99837						3	3	3	0.7	0.7	0.7	570.29	0	23711000	5	1	3	1	3	n. def.	7.37495	n. def.	n. def.	A2AN08-3;A2AN08;A2AN08-5;F6SSP6;A2VCS3;Z4YMA7;A2AN08-2	A2AN08-3;A2AN08;A2AN08-5;F6SSP6	E3 ubiquitin-protein ligase UBR4	Ubr4
n. def.	n. def.	+					1	1	1	1.7	1.7	1.7	79.757	1	0	1	0	1	0	1	n. def.	n. def.	74	362	Q8C0M8;A2ANP4	Q8C0M8;A2ANP4	Dynein intermediate chain 1, axonemal	Dnai1;Dnaic1
n. def.	4.76899						2	2	2	0.5	0.5	0.5	629.58	0.00088183	16743000	2	0	2	0	2	n. def.	7.22383	n. def.	n. def.	J3QMC5;A2ANY6	J3QMC5;A2ANY6	Midasin	Mdn1
5.76833	n. def.						1	1	1	10.1	10.1	10.1	18.311	0	2932900	2	1	0	1	0	6.4673	n. def.	n. def.	n. def.	A2AP78;Q544R9;O54879	A2AP78;Q544R9;O54879	High mobility group protein B3	Hmgb3
n. def.	5.83521						7	7	7	16.1	16.1	16.1	80.09	0	26686000	9	0	7	0	7	n. def.	7.42628	n. def.	n. def.	Q9CT36;A2APB8;Q8BTJ3	Q9CT36;A2APB8;Q8BTJ3	Targeting protein for Xklp2	Tpx2
n. def.	4.56169	+					1	1	1	0.6	0.6	0.6	353.16	1	6816000	0	0	1	0	1	n. def.	6.83353	n. def.	n. def.	A2AQB2;A2AQA9;E9Q1W3	A2AQB2;A2AQA9;E9Q1W3		Neb
4.49592	5.61542						3	3	3	5.8	5.8	5.8	80.953	0	19528000	4	2	2	2	2	6.13938	7.25888	n. def.	n. def.	Q64521;A2AQR0	Q64521;A2AQR0	Glycerol-3-phosphate dehydrogenase, mitochondrial	Gpd2
n. def.	n. def.	+					1	1	1	1.9	1.9	1.9	113.51	1	0	1	0	1	0	1	n. def.	n. def.	n. def.	n. def.	F7BGZ6;A2ARZ3	F7BGZ6;A2ARZ3	Fibrous sheath-interacting protein 2	Fsip2
n. def.	n. def.	+					1	1	1	2.3	2.3	2.3	55.162	1	0	1	0	1	0	1	n. def.	n. def.	79	139	L7MU96;A2ASJ1	L7MU96;A2ASJ1		Gm13128;Pramef17
3.28495	3.49584						5	5	5	0.3	0.3	0.3	2986.4	0	7589100	3	3	2	3	2	6.46105	6.67192	n. def.	n. def.	A2ASS6-2;E9Q8N1;E9Q8K5;A2ASS6;A2ASS6-3;Q8BUJ6;Q8BIH3	A2ASS6-2;E9Q8N1;E9Q8K5;A2ASS6;A2ASS6-3	Titin	Ttn
n. def.	5.2579	+					1	1	1	1.1	1.1	1.1	147.55	1	11771000	1	0	1	0	1	n. def.	7.07081	n. def.	n. def.	A2AT37	A2AT37		Upf2
6.64512	6.78723						7	7	7	32.8	32.8	32.8	31.198	0	179240000	14	6	5	6	5	7.87556	8.01766	n. def.	n. def.	Q64012-2;Q3U3F6;A2AU62;Q64012;A2AU61;Q3TGD3;A2AU60	Q64012-2;Q3U3F6;A2AU62;Q64012;A2AU61;Q3TGD3;A2AU60	RNA-binding protein Raly	Raly
n. def.	6.20491						1	1	1	14.4	14.4	14.4	11.234	0.0058608	8014700	1	0	1	0	1	n. def.	6.90389	n. def.	n. def.	A2AUM6;P16254	A2AUM6;P16254	Signal recognition particle 14 kDa protein;Signal recognition particle 14 kDa protein, N-terminally processed	Srp14
6.52912	n. def.	+					1	1	1	3.4	3.4	3.4	40.432	1	67633000	0	1	0	1	0	7.83016	n. def.	86	337	A2AUU0-4	A2AUU0-4
6.45948	n. def.						1	1	1	2.8	2.8	2.8	50.601	0.0058437	46089000	1	1	0	1	0	7.6636	n. def.	n. def.	n. def.	A2AV25	A2AV25	Fibrinogen C domain-containing protein 1	Fibcd1
5.78436	5.98						8	8	8	9.6	9.6	9.6	158.39	0	161050000	17	4	7	4	7	7.7972	7.99284	n. def.	n. def.	A2AVJ7;Q99PL5;Q99PL5-12;Q99PL5-11;Q99PL5-10;Q99PL5-9;Q99PL5-8;Q99PL5-7;Q99PL5-6;Q99PL5-5;Q99PL5-4;Q99PL5-3;Q99PL5-2;Q6ZPS0;Q8CAB9;Q3ULC0	A2AVJ7;Q99PL5;Q99PL5-12;Q99PL5-11;Q99PL5-10;Q99PL5-9;Q99PL5-8;Q99PL5-7;Q99PL5-6;Q99PL5-5;Q99PL5-4;Q99PL5-3;Q99PL5-2;Q6ZPS0	Ribosome-binding protein 1	Rrbp1
n. def.	5.71869						2	2	2	0.9	0.9	0.9	312.13	0.0071276	77439000	2	0	2	0	2	n. def.	7.88896	n. def.	n. def.	H7BX50;A2AWL7-3;A2AWL7;E9QLG3;A2AWL7-2	H7BX50;A2AWL7-3;A2AWL7;E9QLG3;A2AWL7-2	MAX gene-associated protein	Mga
5.6619	6.40231						7	7	7	11	11	11	85.009	0	95500000	12	2	7	2	7	7.16705	7.90746	n. def.	n. def.	A2AWT6;P25976-2;Q9DBH1;A2AWT7;A2AWT5;P25976;Q05DS1;E9Q4A8	A2AWT6;P25976-2;Q9DBH1;A2AWT7;A2AWT5;P25976;Q05DS1	Nucleolar transcription factor 1	Ubtf
4.25746	4.54317						1	1	1	0.9	0.9	0.9	250.8	0.0053805	6309300	3	1	1	1	1	6.33302	6.61872	n. def.	n. def.	A2AX52	A2AX52	Collagen alpha-4(VI) chain	Col6a4
5.5042	6.7119						2	2	2	10.2	10.2	10.2	24.923	0	49234000	6	1	2	1	2	6.45844	7.66614	n. def.	n. def.	A2BE93;Q9EQU5-2;Q9EQU5;Q5U445;Q3T9S3;A2BE92	A2BE93;Q9EQU5-2;Q9EQU5;Q5U445;Q3T9S3;A2BE92	Protein SET	Set;BC085271
5.74008	5.76839						3	3	3	9.9	9.9	9.9	59.411	0	20453000	3	2	2	2	2	6.99535	7.02366	n. def.	n. def.	Q3UDA2;A2BFF8;O88487;A2BFF7;D6Q0F7;Q3TPJ8;A2BFF5;A2BFF9;D6Q0F6;D6Q0F5	Q3UDA2;A2BFF8;O88487;A2BFF7;D6Q0F7;Q3TPJ8;A2BFF5;A2BFF9;D6Q0F6;D6Q0F5	Cytoplasmic dynein 1 intermediate chain 2	Dync1i2
n. def.	6.76202				TCF4		4	3	3	17.9	15.2	15.2	47.53	0	115620000	4	0	4	0	3	n. def.	8.06303	n. def.	n. def.	Q8C434;Q6GSP7;P97863-3;A2BG76;P97863-2;I7HIP8;A2BG75;A2BG77;P97863;Q3UFE1;Q8BN68;A2ADI3;A0A1B0GX74	Q8C434;Q6GSP7;P97863-3;A2BG76;P97863-2;I7HIP8;A2BG75;A2BG77;P97863;Q3UFE1;Q8BN68;A2ADI3;A0A1B0GX74	Nuclear factor 1;Nuclear factor 1 B-type	Nfib
n. def.	5.81649				OLIG2		5	5	5	6	6	6	128.42	0	33424000	5	0	5	0	5	n. def.	7.52406	n. def.	n. def.	Q9Z148-2;Q9Z148-3;Q3U4G9;A2CG76;Q9Z148;Q8BP38;G3UYH7;A2CG77	Q9Z148-2;Q9Z148-3;Q3U4G9;A2CG76;Q9Z148;Q8BP38	Histone-lysine N-methyltransferase EHMT2	Ehmt2
4.6165	5.85704						5	5	5	6.2	6.2	6.2	136.97	0	46413000	7	1	5	1	5	6.40183	7.64238	n. def.	n. def.	Q924C1;A2RRJ4;Q924C1-3;Q924C1-2	Q924C1;A2RRJ4	Exportin-5	Xpo5
n. def.	n. def.	+					1	1	1	1.4	1.4	1.4	111.41	1	0	1	1	0	1	0	n. def.	n. def.	87	345	A2RRK7;Q6PAJ1	A2RRK7;Q6PAJ1	Breakpoint cluster region protein	Bcr
n. def.	6.31519						2	2	2	11.3	11.3	11.3	29.421	0	30994000	2	0	2	0	2	n. def.	7.49128	n. def.	n. def.	Q9CR32;Q62376;A2RS68;A0A1B0GR69;A0A1B0GRV8;Q6ZWP0;Q62376-2;A0A1B0GRR8	Q9CR32;Q62376;A2RS68;A0A1B0GR69;A0A1B0GRV8;Q6ZWP0;Q62376-2;A0A1B0GRR8	U1 small nuclear ribonucleoprotein 70 kDa	Snrnp70
5.86262	6.33598						3	3	3	13.3	13.3	13.3	42.679	0	43446000	4	1	3	1	3	7.0387	7.51207	n. def.	n. def.	Q78ZA7;A2RSB1;B7ZNL2;Q8C1W9;A0A140LJ37;A0A140LI78;A0A140LJB5	Q78ZA7;A2RSB1;B7ZNL2;Q8C1W9;A0A140LJ37	Nucleosome assembly protein 1-like 4	Nap1l4
n. def.	n. def.	+					1	1	1	0.9	0.9	0.9	144.63	1	0	1	1	0	1	0	n. def.	n. def.	88	1068	A2RSQ0	A2RSQ0	DENN domain-containing protein 5B	Dennd5b
5.17731	n. def.						1	1	1	2.9	2.9	2.9	46.894	0.0055075	3158800	1	1	0	1	0	6.49952	n. def.	n. def.	n. def.	Q9D7D2;A2RSX5	Q9D7D2;A2RSX5	Serpin A9	Serpina9
n. def.	5.50569						1	1	1	7.2	7.2	7.2	17.138	0.0064841	3204000	1	0	1	0	1	n. def.	6.50569	n. def.	n. def.	P61089;A2RTT4	P61089;A2RTT4	Ubiquitin-conjugating enzyme E2 N	Ube2n
n. def.	5.51646				OLIG2		3	3	3	1.6	1.6	1.6	282.71	0	35472000	3	0	3	0	3	n. def.	7.54989	n. def.	n. def.	B1AWL2;A2SW42;B1AWL4;B1AWL5	B1AWL2;A2SW42		Zfp462
6.26031	n. def.						2	2	2	1.7	1.7	1.7	128.48	0	100160000	2	2	0	2	0	8.00069	n. def.	397	105	A2VCS7;E9PWM3	A2VCS7;E9PWM3		Armcx4
6.28033	6.60106						6	2	2	11.2	4.2	4.2	67.852	0	188730000	9	5	6	1	2	7.78547	8.10622	n. def.	n. def.	Q91YZ8;D3Z5M2;A3KFU5;A3KFU8;Q99LF8;Q6PHQ9;Q3UX16	Q91YZ8;D3Z5M2;A3KFU5;A3KFU8;Q99LF8;Q6PHQ9;Q3UX16		Pabpc4;Gm10110
n. def.	6.14777				OLIG2		5	5	5	7.3	7.3	7.3	92.849	0	51995000	5	1	5	1	5	n. def.	7.71596	n. def.	n. def.	Q6ZQ88;A3KG93;G8JL40;F6ZC60;F6Z4I3	Q6ZQ88;A3KG93;G8JL40	Lysine-specific histone demethylase 1A	Kdm1a
n. def.	n. def.	+					1	1	1	3.1	3.1	3.1	54.145	1	0	1	1	0	1	0	n. def.	n. def.	n. def.	n. def.	A3KGI5;Q66JQ7;A3KGI3	A3KGI5;Q66JQ7;A3KGI3	Protein CASC5	Casc5
n. def.	6.08934						2	1	1	6.6	4.2	4.2	41.934	0	13512000	2	0	2	0	1	n. def.	7.13072	n. def.	n. def.	A3KGK7;B7ZCP4;Q8C166;V9GXM6;F6R587;Q571A1	A3KGK7;B7ZCP4;Q8C166;V9GXM6;F6R587;Q571A1	Copine-1	Cpne1
7.17061	6.96676						6	6	6	51.1	51.1	51.1	9.4226	0	48151000	11	6	4	6	4	7.47166	7.26778	n. def.	n. def.	Q5BL14;Q58E57;P09602;A3KGL9;F6W687;Q5XK38;B7ZCQ3;E9Q2Z4;J3QM43	Q5BL14;Q58E57;P09602;A3KGL9;F6W687;Q5XK38;B7ZCQ3	Non-histone chromosomal protein HMG-17	Hmgn2
4.90367	5.4421						1	1	1	6.9	6.9	6.9	17.665	0	3568700	2	1	1	1	1	5.90367	6.4421	n. def.	n. def.	A3KGT0;S4R1S7;Q9Z0H4-2;Q9Z0H4-6	A3KGT0;S4R1S7;Q9Z0H4-2;Q9Z0H4-6		Celf2
4.20957	5.40351						7	7	7	4.4	4.4	4.4	282.89	0	37989000	8	2	6	2	6	6.35879	7.55273	n. def.	n. def.	B7ZWK3;A3KGU5;B9EKJ1;B2RXX6;A3KGU7;E9Q447;A3KGU9;P16546-2;P16546;Q3TYI8;Q6PA04;Q58ES7;Q3URW8;Q3V1V5	B7ZWK3;A3KGU5;B9EKJ1;B2RXX6;A3KGU7;E9Q447;A3KGU9;P16546-2;P16546	Spectrin alpha chain, non-erythrocytic 1	Sptan1
6.93113	6.78421						7	5	5	29.6	22.2	22.2	27.7	0	204650000	14	5	5	3	4	8.07726	7.93034	n. def.	n. def.	P68254-2;P68254;A3KML3;F6YY69;F6VW30	P68254-2;P68254;A3KML3;F6YY69;F6VW30	14-3-3 protein theta	Ywhaq
7.54574	8.05827						11	11	11	56.8	56.8	56.8	16.445	0	1644400000	25	9	11	9	11	8.58714	9.09965	n. def.	n. def.	P14131;A4FUS1;Q641N3;Q5CZY9	P14131;A4FUS1;Q641N3;Q5CZY9	40S ribosomal protein S16	Rps16
n. def.	n. def.	+					1	1	1	13.9	13.9	13.9	11.518	1	0	1	1	0	1	0	n. def.	n. def.	n. def.	n. def.	A5JHE0	A5JHE0		Kcnma1
n. def.	6.16634	+					1	1	1	4.5	4.5	4.5	40.91	1	26401000	1	0	1	0	1	n. def.	7.42162	n. def.	n. def.	A6H684-2	A6H684-2
6.31773	6.61174						6	6	5	26.4	26.4	18.7	39.355	0	141880000	13	5	6	4	5	7.67946	7.97347	n. def.	n. def.	Q5FWB7;P05064;A6ZI44;D3YWI1;Q6NY00;A0A0U1RPN8;D3YV98;A0A0U1RPT5;D3Z510;Q9CPQ9;A6ZI47;A6ZI46	Q5FWB7;P05064;A6ZI44;D3YWI1;Q6NY00;A0A0U1RPN8;D3YV98;A0A0U1RPT5;D3Z510;Q9CPQ9;A6ZI47;A6ZI46	Fructose-bisphosphate aldolase;Fructose-bisphosphate aldolase A	Aldoa;Aldoart1;Aldoart2
n. def.	n. def.						1	1	1	1.6	1.6	1.6	108.71	0	0	1	0	1	0	1	n. def.	n. def.	n. def.	n. def.	A7ISP9;Q3UMY5;F8WJ93	A7ISP9;Q3UMY5;F8WJ93	Echinoderm microtubule-associated protein-like 4	Eml4
5.15945	6.57522	+					5	1	1	11.5	2.6	2.6	57.164	1	85903000	6	2	4	0	1	6.50187	7.91765	98	6	A7UQY4	A7UQY4		Myef2
6.79185	6.72334						8	6	5	32.8	25.5	21.5	28.302	0	183690000	10	6	7	3	5	7.99597	7.92746	99	149	P61982;A8IP69;Q9JJ20;O70456;Q3V453	P61982;A8IP69	14-3-3 protein gamma;14-3-3 protein gamma, N-terminally processed	Ywhag
6.69095	7.04763						3	3	3	30.6	30.6	30.6	16.356	0	176740000	11	2	3	2	3	7.73234	8.08902	n. def.	n. def.	B0LAA8;Q5NC82;Q01768;E9PZF0;Q5NC80;Q5NC81;P15532;Q8R4B4;Q5NC79	B0LAA8;Q5NC82;Q01768;E9PZF0;Q5NC80;Q5NC81;P15532;Q8R4B4	Nucleoside diphosphate kinase;Nucleoside diphosphate kinase B;Nucleoside diphosphate kinase A	Nme2;Gm20390;Nme1;Dscaml1
n. def.	5.64142						1	1	1	13.4	13.4	13.4	16.857	0.0032573	3941400	1	0	1	0	1	n. def.	6.59565	n. def.	n. def.	B0QZL2;Q9EPA7;Q3V455;Q3V449	B0QZL2;Q9EPA7;Q3V455;Q3V449	Nicotinamide mononucleotide adenylyltransferase 1	Nmnat1
n. def.	5.69362						1	1	1	10.5	10.5	10.5	11.853	0.0071429	2963300	1	0	1	0	1	n. def.	6.47178	n. def.	n. def.	B0QZX9;Q8BHC4	B0QZX9;Q8BHC4	Dephospho-CoA kinase domain-containing protein	Dcakd
n. def.	5.76944						1	1	1	3.2	3.2	3.2	52.901	0	8233200	1	0	1	0	1	n. def.	6.91557	n. def.	n. def.	B0R077;Q8CG95;B1AXS6;B1AXS8;B1AXS7;Q9JLM4;B1AXS5	B0R077;Q8CG95;B1AXS6;B1AXS8;B1AXS7;Q9JLM4;B1AXS5	Zinc finger MYM-type protein 3	Zmym3
n. def.	7.20815						3	3	3	34.5	34.5	34.5	13.438	0	113040000	3	0	3	0	3	n. def.	8.05323	n. def.	n. def.	B0R1E3;P70349	B0R1E3;P70349	Histidine triad nucleotide-binding protein 1	Hint1
5.90029	n. def.						1	1	1	5.1	5.1	5.1	19.596	0.0053191	10333000	1	1	0	1	0	7.01423	n. def.	n. def.	n. def.	B0V2N8;B0V2N7;Q9CZI7;Q542G9;Q3UCD3;P07356	B0V2N8;B0V2N7;Q9CZI7;Q542G9;Q3UCD3;P07356	Annexin;Annexin A2	Anxa2
8.00367	n. def.	+					1	1	1	8.2	8.2	8.2	16.887	1	605100000	1	1	0	1	0	8.78183	n. def.	n. def.	n. def.	D6RGP2;Q3U3Z2;Q3SYK2;B0V2V6;Q63ZX2;Q9ESU6-2;B2RSE4;B0V2V8;Q9ESU6;Q3UH70	D6RGP2;Q3U3Z2;Q3SYK2;B0V2V6;Q63ZX2;Q9ESU6-2;B2RSE4;B0V2V8;Q9ESU6;Q3UH70	Bromodomain-containing protein 4	Brd4
n. def.	6.48854						1	1	1	5.7	5.7	5.7	25.03	0.00086281	15400000	1	0	1	0	1	n. def.	7.18752	n. def.	n. def.	B1AQG7;Q8CCB2;Q9JMD0-4;Q9JMD0-3;Q9JMD0-2;Q9JMD0	B1AQG7;Q8CCB2;Q9JMD0-4;Q9JMD0-3;Q9JMD0-2;Q9JMD0		Zfp207
5.62397	6.09614						3	2	2	10.3	8.4	8.4	49.812	0	31701000	3	1	3	0	2	6.90273	7.37489	n. def.	n. def.	Q8CHH9;Q8CHH9-2;B7ZC46;B1AQY9;B1AQZ0;E0CYM4	Q8CHH9;Q8CHH9-2;B7ZC46;B1AQY9;B1AQZ0	Septin-8	2008-09-01
n. def.	n. def.						1	1	1	3.5	3.5	3.5	39.998	0	0	2	0	1	0	1	n. def.	n. def.	n. def.	n. def.	E9QA68;B1ASA5	E9QA68;B1ASA5		Zfp362
n. def.	5.3511						1	1	1	3.9	3.9	3.9	48.033	0	5611100	1	0	1	0	1	n. def.	6.74905	n. def.	n. def.	Q3TJN5;B1AT03;P97386-2;Q3UC82;Q3U1F0;Q80ZH7;P97386;K4DI59	Q3TJN5;B1AT03;P97386-2;Q3UC82;Q3U1F0;Q80ZH7;P97386;K4DI59	DNA ligase;DNA ligase 3	Lig3
5.66037	7.24035				OLIG2		7	5	5	29.4	24.1	24.1	49.977	0	321290000	9	1	7	1	5	6.91565	8.49561	n. def.	n. def.	Q02780-2;B1AUB9;Q6DI81;B1AUC0;Q02780-3;Q02780-7;Q02780-4;Q3UTK6;Q02780;B1AUB8;Q69ZJ5;Q05B39;Q02780-5;Q02780-6;B1AUB6;F7CDR2;P70255-7;P70255-6;P70255-5;P70255-4;Q3UHA6;P70255-3;P70255-2;P70255	Q02780-2;B1AUB9;Q6DI81;B1AUC0;Q02780-3;Q02780-7;Q02780-4;Q3UTK6;Q02780;B1AUB8;Q69ZJ5;Q05B39;Q02780-5;Q02780-6	Nuclear factor 1 A-type;Nuclear factor 1	Nfia
n. def.	5.75976				TCF4		2	2	2	9.9	9.9	9.9	36.213	0	8051700	3	0	2	0	2	n. def.	6.90589	n. def.	n. def.	Q8K0R3;Q6NV61;B1AUF2;Q60698;B1AUF1	Q8K0R3;Q6NV61;B1AUF2;Q60698;B1AUF1	Ski oncogene	Ski
4.96228	6.18557				OLIG2		10	10	10	8.6	8.6	8.6	210.43	0	116990000	13	1	10	1	10	6.81961	8.04289	n. def.	n. def.	Q61191;B1AUX2;Q3USQ6;F6SJS2	Q61191;B1AUX2	Host cell factor 1;HCF N-terminal chain 1;HCF N-terminal chain 2;HCF N-terminal chain 3;HCF N-terminal chain 4;HCF N-terminal chain 5;HCF N-terminal chain 6;HCF C-terminal chain 1;HCF C-terminal chain 2;HCF C-terminal chain 3;HCF C-terminal chain 4;HCF C-terminal chain 5;HCF C-terminal chain 6	Hcfc1
n. def.	n. def.	+					1	1	1	2	2	2	106.51	1	0	1	1	0	1	0	n. def.	n. def.	n. def.	n. def.	Q6PFB1;Q9ESQ1;B1AVK5	Q6PFB1;Q9ESQ1;B1AVK5		Col4a6
n. def.	n. def.	+					1	1	1	4.1	4.1	4.1	36.213	1	0	1	1	0	1	0	n. def.	n. def.	103	270	Q811M1-2;B1AW40;Q811M1	Q811M1-2;B1AW40;Q811M1	Rho GTPase-activating protein 15	Arhgap15
5.05434	5.16432						3	3	3	5.7	5.7	5.7	63.589	0	8038900	4	3	1	3	1	6.5457	6.65569	n. def.	n. def.	Q505F5;B1AX98;E9PV22;F6YT33;F6Z4L9	Q505F5;B1AX98;E9PV22	Leucine-rich repeat-containing protein 47	Lrrc47
n. def.	n. def.	+					1	1	1	3.5	3.5	3.5	74.782	1	0	1	1	0	1	0	n. def.	n. def.	n. def.	n. def.	B1AY15	B1AY15		Usp51
n. def.	5.58101						1	1	1	5.6	5.6	5.6	30.376	0.0032441	6859300	1	0	1	0	1	n. def.	6.83628	n. def.	n. def.	Q9CZ30-2;B1AYJ9;Q9CZ30;Q3TW21;Q3TJF2	Q9CZ30-2;B1AYJ9;Q9CZ30;Q3TW21;Q3TJF2	Obg-like ATPase 1	Ola1
4.76409	5.26053						2	2	2	1.4	1.4	1.4	182.77	0.0008643	18261000	4	1	2	1	2	6.64491	7.14132	n. def.	n. def.	B1AZI6;Q8C690;Q3UUT9	B1AZI6;Q8C690;Q3UUT9	THO complex subunit 2	Thoc2
6.74517	7.0976						2	1	1	8.3	4.8	4.8	26.391	0.00087336	253140000	5	2	2	1	1	7.8913	8.24373	n. def.	n. def.	B1AZS9;O08807	B1AZS9;O08807	Peroxiredoxin-4	Prdx4
5.55871	6.0389						1	1	1	4.6	4.6	4.6	33.99	0.0031974	17468000	2	1	1	1	1	6.6379	7.11807	n. def.	n. def.	P97474-4;B1VD84	P97474-4;B1VD84		Pitx2
6.64871	7.4024						8	8	8	39.3	39.3	39.3	32.838	0	386240000	13	3	7	3	7	7.76266	8.51634	n. def.	n. def.	P14206;B2CY77;A0A1L1SRW0;A0A1L1SUK3	P14206;B2CY77;A0A1L1SRW0	40S ribosomal protein SA	Rpsa
n. def.	5.67245				OLIG2		3	3	3	7.4	7.4	7.4	80.124	0	16934000	2	0	3	0	3	n. def.	7.22876	n. def.	n. def.	X2FV61;P35710;B2KFM9;Q8C4K8;P35710-2;B2KFM4;E9PVR0;Q2TBA9;B2KFM7;Q3TVF9;P35710-3	X2FV61;P35710;B2KFM9;Q8C4K8;P35710-2;B2KFM4;E9PVR0;Q2TBA9	Transcription factor SOX-5	Sox5
7.0639	7.50576						5	2	2	27.3	13.3	13.3	29.583	0	523560000	11	4	4	1	2	8.14308	8.58494	n. def.	n. def.	Q3TF69;Q61990-3;B2M1R7;Q61990;E9Q7D8;Q8CFQ6;Q3TT81;Q61990-2;P57722-2;P57722;A0A1L1SRP9	Q3TF69;Q61990-3;B2M1R7;Q61990;E9Q7D8;Q8CFQ6;Q3TT81;Q61990-2;P57722-2;P57722	Poly(rC)-binding protein 2;Poly(rC)-binding protein 3	Pcbp2;Pcbp3
n. def.	4.83215	+					1	1	1	3.8	3.8	3.8	34.347	1	1019200	0	0	1	0	1	n. def.	6.00826	108	153	Q3ZB72;E9Q441;Q9Z0E3-12;Q9Z0E3-11;Q9Z0E3-10;Q9Z0E3-9;Q9Z0E3-8;Q9Z0E3-7;Q9Z0E3-6;Q9Z0E3-5;Q3ZB71;Q9Z0E3-4;Q9Z0E3-3;Q9Z0E3-2;Q3ZB65;Q9Z0E3;B2MVU6	Q3ZB72;E9Q441;Q9Z0E3-12;Q9Z0E3-11;Q9Z0E3-10;Q9Z0E3-9;Q9Z0E3-8;Q9Z0E3-7;Q9Z0E3-6;Q9Z0E3-5;Q3ZB71;Q9Z0E3-4;Q9Z0E3-3;Q9Z0E3-2;Q3ZB65;Q9Z0E3;B2MVU6	Autoimmune regulator	Aire
n. def.	4.88967						1	1	1	3.5	3.5	3.5	42.195	0	1628900	2	1	1	1	1	n. def.	6.21189	n. def.	n. def.	Q3UWP8;P14211;B2MWM9	Q3UWP8;P14211;B2MWM9	Calreticulin	Calr
n. def.	n. def.	+					1	1	1	1.7	1.7	1.7	93.718	1	0	1	1	0	1	0	n. def.	n. def.	n. def.	n. def.	B9EJA5;Q9JHA8;B2RQ76	B9EJA5;Q9JHA8;B2RQ76	von Willebrand factor A domain-containing protein 7	Vwa7
5.71821	6.16256						12	12	12	7.2	7.2	7.2	236.25	0	213480000	22	9	11	9	11	7.75163	8.19598	n. def.	n. def.	E9QAI5;B2RQC6;B2RQC6-2;G3UWN2;Q6P9L1;E9QAT6;Q7TN13;Q80VF8;Q9CWQ9	E9QAI5;B2RQC6;B2RQC6-2;G3UWN2;Q6P9L1;E9QAT6;Q7TN13		Cad
4.77725	4.78209						2	2	2	1.8	1.8	1.8	146.7	0	8309000	3	1	2	1	2	6.61609	6.62093	n. def.	n. def.	B2RQC7;Q3UH60-2;D3Z5G8;Q3UH60;Q8CBE5;Q5EBR0;Q6NY04;Q6PGL8;Q69ZV2;B7ZMZ7;B2RQ71;E9PWR4	B2RQC7;Q3UH60-2;D3Z5G8;Q3UH60;Q8CBE5;Q5EBR0;Q6NY04;Q6PGL8;Q69ZV2;B7ZMZ7;B2RQ71;E9PWR4	Disco-interacting protein 2 homolog B	Dip2b;Dip2c
n. def.	5.6891	+					1	1	1	1.9	1.9	1.9	126.82	1	34703000	0	0	1	0	1	n. def.	7.54037	n. def.	n. def.	Q8CDI6;B2RQL1	Q8CDI6;B2RQL1	Coiled-coil domain-containing protein 158	Ccdc158
n. def.	5.42737						5	5	5	2.6	2.6	2.6	270.25	0	27288000	8	2	4	2	4	n. def.	7.43597	n. def.	n. def.	P14873;B2RQQ5;Q3UF78;Q9QYR6;Q9QYR6-2;A2ARP8	P14873;B2RQQ5;Q3UF78	Microtubule-associated protein 1B;MAP1B heavy chain;MAP1 light chain LC1	Map1b
4.38321	4.84927						1	1	1	1	1	1	194.75	0	7966700	3	1	1	1	1	6.30747	6.77355	n. def.	n. def.	Q7TT50;B2RQQ7	Q7TT50;B2RQQ7	Serine/threonine-protein kinase MRCK beta	Cdc42bpb
n. def.	4.83829						1	1	1	1.8	1.8	1.8	77.731	0.0058997	1722800	2	0	1	0	1	n. def.	6.23623	n. def.	n. def.	B2RQS1;Q9ERG2	B2RQS1;Q9ERG2	Striatin-3	Strn3
n. def.	n. def.	+					1	1	1	2	2	2	63.348	1	0	1	1	0	1	0	n. def.	n. def.	113	370	O08650;B2RR08	O08650;B2RR08	Hyaluronan synthase 3	Has3
n. def.	6.2101						7	7	7	17.3	17.3	17.3	76.723	0	68132000	8	0	7	0	7	n. def.	7.83335	n. def.	n. def.	Q3THK7;B2RRH9	Q3THK7;B2RRH9	GMP synthase [glutamine-hydrolyzing]	Gmps
7.9998	8.19551						20	20	0	65.3	65.3	0	41.75	0	5136200000	70	18	20	0	0	9.30083	9.49653	n. def.	n. def.	Q3UAF7;Q3UAF6;Q3U5R4;P60710;B2RRX1;Q3UAA9;Q4KL81;P63260;Q3UA89;Q3U939;Q3U804;Q3UGS0;Q3TSB7;Q3TIJ9;Q61276;Q3UCF8;E9Q1F2;E9Q5F4;Q3UD81;G3UZ07;A1E281;G3UYG0;E9Q606;Q61272;B1ATY1;Q99NC5;F8WGM8;E9Q2D1;O89054;F6WX90;Q6IWE2;Q7M0E4;Q8CF71;V9GXQ2;A0A0U1RQ96;Q6GQT3;E9Q3M9	Q3UAF7;Q3UAF6;Q3U5R4;P60710;B2RRX1;Q3UAA9;Q4KL81;P63260;Q3UA89;Q3U939;Q3U804;Q3UGS0;Q3TSB7;Q3TIJ9;Q61276;Q3UCF8;E9Q1F2;E9Q5F4;Q3UD81;G3UZ07	Actin, cytoplasmic 1;Actin, cytoplasmic 1, N-terminally processed;Actin, cytoplasmic 2;Actin, cytoplasmic 2, N-terminally processed	Actb;Actg1
n. def.	5.75587						3	3	3	8	8	8	83.27	0	19950000	3	0	3	0	3	n. def.	7.29994	n. def.	n. def.	Q7JJ13-2;Q7JJ13;B2RS09;U3KLT0;I7HPW1	Q7JJ13-2;Q7JJ13;B2RS09;U3KLT0	Bromodomain-containing protein 2	Brd2
5.4647	6.01064						4	4	4	7.2	7.2	7.2	102.71	0	52654000	8	2	3	2	3	7.06677	7.61271	n. def.	n. def.	P46935;B2RSC8;Q3TUU1;Q8CFI0-2;G3X9H8;Q641N8;Q3TQK9;E9PXB7;Q8CFI0-3;Q8CFI0	P46935;B2RSC8	E3 ubiquitin-protein ligase NEDD4;E3 ubiquitin-protein ligase	Nedd4
7.69727	8.09823	+					27	1	1	62.5	2.7	2.7	49.953	1	3503800000	83	19	26	1	1	8.99831	9.39928	n. def.	n. def.	Q9CWF2;B2RSN3;Q99J49;A2AQ07;CON__ENSEMBL:ENSBTAP00000025008;G3UZR1;Q62363;A0A1D5RM76	Q9CWF2;B2RSN3;Q99J49	Tubulin beta-2B chain	Tubb2b;Tubb2a
n. def.	5.74139	+					1	1	1	3.9	3.9	3.9	32.618	1	6615600	1	0	1	0	1	n. def.	6.82057	n. def.	n. def.	B7ZNW3;Q8BH47;B2RSR2	B7ZNW3;Q8BH47;B2RSR2	Vesicle-trafficking protein SEC22a	Sec22a
5.96506	6.66417						14	14	14	15.9	15.9	15.9	135.55	0	287960000	25	7	13	7	13	7.68106	8.38018	n. def.	n. def.	Q921M3;B2RSV4;Q921M3-2	Q921M3;B2RSV4;Q921M3-2	Splicing factor 3B subunit 3	Sf3b3
n. def.	5.93907						2	2	2	17.5	17.5	17.5	23.211	0.00085911	13036000	2	0	2	0	2	n. def.	7.11514	n. def.	n. def.	F6ZQQ3;E9Q5I9;Q9WVJ2;B2RT97	F6ZQQ3;E9Q5I9;Q9WVJ2;B2RT97	26S proteasome non-ATPase regulatory subunit 13	Psmd13
n. def.	5.92899						1	1	1	12.9	12.9	12.9	16.513	0	4245800	1	0	1	0	1	n. def.	6.62796	n. def.	n. def.	F7DFQ2;B2RTG7;E0CYH4;Q8C6G8	F7DFQ2;B2RTG7;E0CYH4;Q8C6G8	WD repeat-containing protein 26	Wdr26
9.31629	9.30402						18	18	18	64.1	64.1	64.1	11.367	0	24512000000	90	17	15	17	15	10.0944	10.0822	n. def.	n. def.	P62806;B2RTM0;Q61667;Q6B822	P62806;B2RTM0;Q61667	Histone H4	Hist1h4a;Gm11275;Hist2h4
n. def.	5.73502						4	4	4	6.4	6.4	6.4	70.885	0	17385000	5	0	4	0	4	n. def.	7.24017	n. def.	n. def.	Q8BZ97;B2RU90	Q8BZ97;B2RU90	PR domain zinc finger protein 8	Prdm8
5.35725	6.52777						6	6	6	25.7	25.7	25.7	38.442	0	75573000	10	2	6	2	6	6.67947	7.84998	n. def.	n. def.	Q9Z1Z2;B2RUC7	Q9Z1Z2;B2RUC7	Serine-threonine kinase receptor-associated protein	Strap
n. def.	5.78106				TCF4		7	7	7	11.1	11.1	11.1	114.45	0	27182000	8	0	7	0	7	n. def.	7.43428	n. def.	n. def.	B2RUG7;O88532;F6V459;D3Z5G4;F6QJP7	B2RUG7;O88532	Zinc finger RNA-binding protein	Zfr
n. def.	4.4823	+					1	1	1	0.7	0.7	0.7	250.63	1	3491500	1	0	1	0	1	n. def.	6.54301	118	1058	Q80YT7;E9Q1A0;B7ZNY0;G3X9L9;B2RUJ9	Q80YT7;E9Q1A0;B7ZNY0;G3X9L9;B2RUJ9	Myomegalin	Pde4dip
n. def.	6.19546						2	2	2	21.3	21.3	21.3	11.732	0	6273600	2	1	1	1	1	n. def.	6.79752	n. def.	n. def.	Q9CSJ2;Q9CSG7;Q8K363;B2RUM8	Q9CSJ2;Q9CSG7;Q8K363;B2RUM8	ATP-dependent RNA helicase DDX18	Ddx18
8.86125	7.66523						3	2	2	31.2	24.2	24.2	13.509	0	3863900000	15	3	2	2	2	9.56022	8.36419	n. def.	n. def.	Q3THW5;P0C0S6;B2RVP5;Q8R029;Q3TFU6;Q3UA95;G3UWL7	Q3THW5;P0C0S6;B2RVP5;Q8R029;Q3TFU6;Q3UA95	Histone H2A.V;Histone H2A.Z;Histone H2A	H2afv;H2afz
8.90161	8.64296						7	2	2	39.2	14.4	14.4	13.607	0	6183900000	21	5	6	2	2	9.60057	9.34193	n. def.	n. def.	F8WIX8;Q64523;Q149V4;Q6GSS7;B2RWH3	F8WIX8;Q64523;Q149V4;Q6GSS7;B2RWH3	Histone H2A;Histone H2A type 2-C;Histone H2A type 2-A	Hist1h2al;Hist2h2ac;Hist2h2aa1
n. def.	4.73645						2	2	2	2.1	2.1	2.1	144.77	0.0058565	3270400	2	0	2	0	2	n. def.	6.5146	n. def.	n. def.	E9Q175;E9Q3L1;B2RWR8;Q64331;E9PVU0;E9Q174;V9GXM4;V9GX76;Q6A077;Q8BK95	E9Q175;E9Q3L1;B2RWR8;Q64331;E9PVU0;E9Q174;V9GXM4;V9GX76;Q6A077;Q8BK95	Unconventional myosin-VI	Myo6
n. def.	4.69533				OLIG2		1	1	1	0.8	0.8	0.8	145.89	0.0065029	2627900	1	0	1	0	1	n. def.	6.41961	n. def.	n. def.	B2RWS7;Q8BZ47	B2RWS7;Q8BZ47	Zinc finger protein 609	Zfp609;Znf609
n. def.	n. def.	+					1	1	1	3.3	3.3	3.3	54.141	1	0	1	1	0	1	0	n. def.	n. def.	n. def.	n. def.	D3Z6Y5;F7CK17;Q9JL70;B2RWU3	D3Z6Y5;F7CK17;Q9JL70;B2RWU3	Fanconi anemia group A protein homolog	Fanca
n. def.	5.3952						1	1	1	0.9	0.9	0.9	167.73	0.0053681	17638000	0	0	1	0	1	n. def.	7.24645	121	194	Q9WVB4;Q3UHN1;B2RX06	Q9WVB4;Q3UHN1;B2RX06	Slit homolog 3 protein	Slit3
n. def.	4.54517						1	1	1	1.1	1.1	1.1	128.39	0.005299	1894800	2	0	1	0	1	n. def.	6.27756	n. def.	n. def.	B2RXC1	B2RXC1	Trafficking protein particle complex subunit 11	Trappc11
n. def.	5.73222				OLIG2		2	2	2	8.6	8.6	8.6	35.079	0	9176400	2	0	2	0	2	n. def.	6.96267	n. def.	n. def.	Q8BFQ4;B2RXQ8;A0A1L1SRB6	Q8BFQ4;B2RXQ8;A0A1L1SRB6	WD repeat-containing protein 82	Wdr82
4.488	n. def.	+					1	1	1	0.9	0.9	0.9	192.91	1	2707000	0	1	0	1	0	6.43249	n. def.	122	829	Q6A070-2;Q6A070;B7ZWL4;B2RXS2;B2RXW9	Q6A070-2;Q6A070;B7ZWL4;B2RXS2;B2RXW9	Protein FAM179B	Fam179b
n. def.	5.35734						2	2	2	1.7	1.7	1.7	164.36	0	14345000	2	0	2	0	2	n. def.	7.1567	n. def.	n. def.	B2RXS8;B9EKR1;Q8BJY4	B2RXS8;B9EKR1;Q8BJY4		Ptprz1
n. def.	6.45054						2	2	2	9.4	9.4	9.4	30.641	0	47972000	1	0	2	0	2	n. def.	7.68099	n. def.	n. def.	P48758;B2RXY7;A0A1B0GRG8	P48758;B2RXY7;A0A1B0GRG8	Carbonyl reductase [NADPH] 1	Cbr1
n. def.	5.23792	+					1	1	1	4.1	4.1	4.1	56.318	1	5188600	0	0	1	0	1	n. def.	6.71505	n. def.	n. def.	B2RXZ2	B2RXZ2		Cyp2a22
n. def.	5.85028						1	1	1	3.1	3.1	3.1	71.006	0	15585000	2	0	1	0	1	n. def.	7.19271	n. def.	n. def.	S4R2B0;B2RY56	S4R2B0;B2RY56	RNA-binding protein 25	Rbm25
n. def.	4.43588	+					1	1	1	0.5	0.5	0.5	214.7	1	2864600	0	0	1	0	1	n. def.	6.45706	422	1267	B2RY88;Q8BQM8	B2RY88;Q8BQM8	Echinoderm microtubule-associated protein-like 5	Eml5
n. def.	5.57477						1	1	1	4.8	4.8	4.8	32.765	0	5634500	1	0	1	0	1	n. def.	6.75086	n. def.	n. def.	F7CL41;F7CPB1;P58269-4;P58269-2;B5TZD5;P58269	F7CL41;F7CPB1;P58269-4;P58269-2;B5TZD5;P58269	Zinc finger protein DPF3	Dpf3
5.31808	5.85637						7	7	7	4.5	4.5	4.5	280.47	0	125070000	12	3	7	3	7	7.44841	7.98671	n. def.	n. def.	B9EKP5;B7FAU9;Q8BTM8;Q6KAM8;B7FAV1;Q4FZG4;I7HPX4;F6Z2C0;Q3U7N9;Q9JJ37;F6XC15	B9EKP5;B7FAU9;Q8BTM8;Q6KAM8;B7FAV1	Filamin-A	Flna
6.43151	6.49062						7	7	7	29.5	29.5	29.5	38.734	0	121710000	14	4	7	4	7	7.75373	7.81283	n. def.	n. def.	Q4FK88;Q4FJV4;Q3U5N9;P10107;B7STB7;Q3US43	Q4FK88;Q4FJV4;Q3U5N9;P10107;B7STB7;Q3US43	Annexin;Annexin A1	Anxa1
n. def.	6.29666						2	2	2	14.3	14.3	14.3	21.871	0	15840000	2	0	2	0	2	n. def.	7.19976	n. def.	n. def.	B7ZNK7;Q3TYD9;P63002;A0A1W2P757;P63002-2	B7ZNK7;Q3TYD9;P63002;A0A1W2P757;P63002-2	Amino-terminal enhancer of split	Aes
4.73703	5.69192						2	2	2	5.4	5.4	5.4	73.877	0	19129000	3	1	2	1	2	6.2811	7.23598	n. def.	n. def.	Q3ULP8;Q91VU7;B7ZNL8;Q69Z76;Q3UQN6;F7CG42	Q3ULP8;Q91VU7;B7ZNL8;Q69Z76;Q3UQN6;F7CG42		Pus7
4.57498	5.85008						7	7	7	9.7	9.7	9.7	143.58	0	43248000	10	1	7	1	7	6.3384	7.6135	n. def.	n. def.	Q6ZQ68;B7ZNR8;B7ZNR9;B2RUE8;P97820;A0A0A6YWR8;F8VPL5;A0A0A6YWM8;E9PVG7;A0A0A6YW53;A0A0A6YWJ2;A0A0A6YVZ8;A0A0A6YVR7;A0A0A6YXE5;F7AMS7;E0CZF8;E0CZD7;P83510-2;E0CXD6;Q9JM52-2;E0CY98;Q9JM52;P83510;B2RXX2;E9PUL9;Q7TT13;Q5SXG1;Q5SXG3;G3X9G2;Q9JM52-3;B9EKN8;B2RQ80;B2RY17	Q6ZQ68;B7ZNR8;B7ZNR9;B2RUE8;P97820;A0A0A6YWR8;F8VPL5;A0A0A6YWM8;E9PVG7;A0A0A6YW53	Mitogen-activated protein kinase kinase kinase kinase 4	Map4k4
n. def.	5.1233						2	2	2	4.2	4.2	4.2	56.381	0	3719300	2	0	2	0	2	n. def.	6.57046	n. def.	n. def.	Q61235;Q542S9;Q3V2N5;B7ZNU9	Q61235;Q542S9;Q3V2N5;B7ZNU9	Beta-2-syntrophin	Sntb2
5.66064	n. def.	+					1	1	1	2.6	2.6	2.6	42.436	1	8239600	0	1	0	1	0	6.91591	n. def.	n. def.	n. def.	Q8CAW0;B7ZNW2;F6RDS0;Q5U430-3;Q5U430;F6QC57	Q8CAW0;B7ZNW2;F6RDS0;Q5U430-3;Q5U430;F6QC57	E3 ubiquitin-protein ligase UBR3	Ubr3
n. def.	4.92963				OLIG2		2	2	2	1.7	1.7	1.7	215.99	0	7908800	4	1	2	1	2	n. def.	6.89811	n. def.	n. def.	P53995;B7ZNX2;Q3UE43;Q3TP10;A2ATQ5	P53995;B7ZNX2;Q3UE43;Q3TP10;A2ATQ5	Anaphase-promoting complex subunit 1	Anapc1
n. def.	n. def.	+					1	1	1	1.3	1.3	1.3	120.19	1	0	1	0	1	0	1	n. def.	n. def.	n. def.	n. def.	Q8BI22-2;Q8BI22;B7ZNX8	Q8BI22-2;Q8BI22;B7ZNX8	Centrosomal protein of 128 kDa	Cep128
4.64637	5.22274						3	3	3	3.1	3.1	3.1	128.65	0	11199000	4	1	3	1	3	6.37064	6.94701	n. def.	n. def.	Q810B6;B7ZP20;Q810B6-2	Q810B6;B7ZP20;Q810B6-2	Ankyrin repeat and FYVE domain-containing protein 1	Ankfy1
6.70962	6.96592						14	13	5	26.3	24.7	10.3	73.013	0	560400000	26	13	10	5	4	8.30068	8.55698	n. def.	n. def.	B9EKE9;B7ZWF1;Q62167;Q3TQX5;P16381;B9EIA2;Q3TUR4;Q61496;Q3V086	B9EKE9;B7ZWF1;Q62167;Q3TQX5;P16381;B9EIA2	ATP-dependent RNA helicase DDX3X;Putative ATP-dependent RNA helicase Pl10	Ddx3x;D1Pas1
n. def.	5.36195						2	2	2	11.2	11.2	11.2	26.052	0.0090153	3221700	1	1	1	1	1	n. def.	6.50809	n. def.	n. def.	B7ZWG6;Q3TZ65	B7ZWG6;Q3TZ65	Outer dense fiber protein 3-like protein 2	Odf3l2
n. def.	5.91355						2	2	2	15.3	15.3	15.3	18.827	0.00084674	9014600	2	0	2	0	2	n. def.	6.95495	n. def.	n. def.	B7ZWI7;B7ZWI4;Q8CHZ0;Q497V5-2;F8WGW3;Q497V5	B7ZWI7;B7ZWI4;Q8CHZ0;Q497V5-2;F8WGW3;Q497V5	S1 RNA-binding domain-containing protein 1	Srbd1
4.26874	4.51574						2	2	2	4.2	4.2	4.2	64.051	0	1438000	3	1	2	1	2	5.71589	5.9629	n. def.	n. def.	Q52KR6;Q9JIX8-3;B8JJ92;Q9JIX8-2;Q7TSL7;B8JJ91;Q80TU6;F6RJ39;Q9JIX8-4;Q9JIX8;Q3UXT9;F6Q8C0;B8JJ90;Q05D19	Q52KR6;Q9JIX8-3;B8JJ92;Q9JIX8-2;Q7TSL7;B8JJ91;Q80TU6;F6RJ39;Q9JIX8-4;Q9JIX8;Q3UXT9;F6Q8C0;B8JJ90;Q05D19	Apoptotic chromatin condensation inducer in the nucleus	Acin1
5.38933	n. def.	+					1	1	1	5.1	5.1	5.1	16.133	1	1960700	0	1	0	1	0	6.29241	n. def.	133	61	B8JJI3;Q8CDG5;B8JJI2	B8JJI3;Q8CDG5;B8JJI2	CREB3 regulatory factor	Crebrf
n. def.	5.84185						2	2	2	6.3	6.3	6.3	48.056	0	12506000	3	0	2	0	2	n. def.	7.09712	n. def.	n. def.	Q8CAT7;B9EHJ9;P33609	Q8CAT7;B9EHJ9;P33609	DNA polymerase alpha catalytic subunit	Pola1
n. def.	5.40408						1	1	1	0.9	0.9	0.9	222.44	0.0008489	26624000	1	0	1	0	1	n. def.	7.42527	134	1235	Q9QY06-3;B9EHV1;Q9QY06;Q9QY06-2	Q9QY06-3;B9EHV1;Q9QY06;Q9QY06-2	Unconventional myosin-IXb	Myo9b
n. def.	4.39048						1	1	1	0.4	0.4	0.4	349.07	0.0031923	3858100	1	0	1	0	1	n. def.	6.58637	n. def.	n. def.	B9EHX4;Q62388	B9EHX4;Q62388	Serine-protein kinase ATM	Atm
n. def.	6.1049						1	1	1	6.2	6.2	6.2	24.283	0.0053846	11459000	3	0	1	0	1	n. def.	7.05915	n. def.	n. def.	Q8C909;P46664;B9EIE9	Q8C909;P46664;B9EIE9	Adenylosuccinate synthetase isozyme 2	Adss
n. def.	5.76224						4	4	4	4.3	4.3	4.3	144.86	0	33548000	5	0	4	0	4	n. def.	7.52567	n. def.	n. def.	D3YUW8;D3YUX1;Q3TSQ2;Q0VGT3;Q8BZH4;B9EIG6	D3YUW8;D3YUX1;Q3TSQ2;Q0VGT3;Q8BZH4;B9EIG6	Pogo transposable element with ZNF domain	Pogz
5.67316	6.60851						18	18	18	16.6	16.6	16.6	170.08	0	380600000	33	7	18	7	18	7.59744	8.53278	n. def.	n. def.	Q8CGC7;B9EIU1;Q8BTR1;Q9CRF9;Q3UGD4;Q3TLK2;A0A0A6YWA4;Q3TMX9	Q8CGC7;B9EIU1	Bifunctional glutamate/proline--tRNA ligase;Glutamate--tRNA ligase;Proline--tRNA ligase	Eprs
5.88056	n. def.	+					1	1	1	1.7	1.7	1.7	116.55	1	32661000	1	1	0	1	0	7.51403	n. def.	135	942	Q9WVL3-2;Q9WVL3;B9EIV8	Q9WVL3-2;Q9WVL3;B9EIV8	Solute carrier family 12 member 7	Slc12a7
n. def.	5.5984						1	1	1	3.4	3.4	3.4	49.162	0.00088339	7932700	1	0	1	0	1	n. def.	6.89942	n. def.	n. def.	Q3TQQ1;B9EKG9;Q9D0D5	Q3TQQ1;B9EKG9;Q9D0D5	General transcription factor IIE subunit 1	AU015228;Gtf2e1
5.55958	n. def.	+					1	1	1	0.5	0.5	0.5	156.03	1	19225000	0	1	0	1	0	7.28387	n. def.	136	1269	Q56A10-2;Q56A10;B9EKR3	Q56A10-2;Q56A10;B9EKR3	Zinc finger protein 608	Znf608;Zfp608
n. def.	5.02698				OLIG2		1	1	1	1.7	1.7	1.7	121.42	0.0039777	5746300	1	0	1	0	1	n. def.	6.75939	n. def.	n. def.	Q6ZPY7-2;Q6ZPY7;B9EKS2	Q6ZPY7-2;Q6ZPY7;B9EKS2	Lysine-specific demethylase 3B	Kdm3b
n. def.	n. def.						1	1	1	23.1	23.1	23.1	6.009	0.0090466	0	1	1	0	1	0	n. def.	n. def.	423	9	C6EQJ4;C6EQI4;C6EQI8;C6EQJ0;C6EQH2	C6EQJ4;C6EQI4;C6EQI8;C6EQJ0;C6EQH2		Clec4a2;4930404A10Rik;Herc2
5.90587	6.66509						5	4	4	23.3	19.9	19.9	33.558	0	81449000	8	1	5	1	4	7.08196	7.84118	n. def.	n. def.	Q9Z130;F6VQH5;D3YTQ3	Q9Z130;F6VQH5;D3YTQ3	Heterogeneous nuclear ribonucleoprotein D-like	Hnrpdl
6.79755	7.1656						3	3	3	27.1	27.1	27.1	13.742	0	125500000	8	2	3	2	3	7.57571	7.94375	n. def.	n. def.	D3YTQ9;Q3UXS6;Q3UK70;P62843	D3YTQ9;Q3UXS6;Q3UK70;P62843	40S ribosomal protein S15	Rps15
n. def.	n. def.	+					1	1	1	0.6	0.6	0.6	243.14	1	0	1	1	0	1	0	n. def.	n. def.	n. def.	n. def.	Q9Z1K7;G5E832;D3YTR0	Q9Z1K7;G5E832;D3YTR0	Adenomatous polyposis coli protein 2	Apc2
6.1025	6.52607				OLIG2		5	5	5	19.8	19.8	19.8	28.338	0	55489000	8	3	4	3	4	7.18167	7.60525	n. def.	n. def.	Q9Z2D8-2;D3YTR5;D3YTR4;Q9Z2D8;F6WZH1	Q9Z2D8-2;D3YTR5;D3YTR4;Q9Z2D8;F6WZH1	Methyl-CpG-binding domain protein 3	Mbd3
n. def.	n. def.						2	2	2	11.8	11.8	11.8	19.569	0.005848	0	2	0	2	0	2	n. def.	n. def.	n. def.	n. def.	D3YWT0;Q9R0P6;D3Z569;D3YTS1;Q6PET3	D3YWT0;Q9R0P6;D3Z569;D3YTS1;Q6PET3	Signal peptidase complex catalytic subunit SEC11A	Sec11a
4.70785	5.34711						2	2	2	5	5	5	62.779	0.00086806	5741900	1	1	2	1	2	6.03007	6.66934	n. def.	n. def.	D3YU17;Q8VCM8	D3YU17;Q8VCM8	Nicalin	Ncln
5.79953	4.92171						4	4	4	8.7	8.7	8.7	100.16	0	35689000	9	4	1	4	1	7.4985	6.62068	n. def.	n. def.	E9QP59;Q9WU40;D3YU56;Q9WU40-2	E9QP59;Q9WU40;D3YU56;Q9WU40-2	Inner nuclear membrane protein Man1	Lemd3
5.58869	5.83406						1	1	1	12.7	12.7	12.7	11.687	0.0054264	5351500	3	1	1	1	1	6.28767	6.53303	n. def.	n. def.	D3YU60;Q91VS7;Q53ZD4;E9QJW0	D3YU60;Q91VS7;Q53ZD4;E9QJW0	Microsomal glutathione S-transferase 1	Mgst1
n. def.	n. def.	+					1	1	1	23.7	23.7	23.7	6.5045	1	0	1	0	1	0	1	n. def.	n. def.	143	39	D3YUN7;D3YZI3;Q3UGR5-2;Q3UGR5	D3YUN7;D3YZI3;Q3UGR5-2;Q3UGR5	Haloacid dehalogenase-like hydrolase domain-containing protein 2	Hdhd2
6.37088	6.14839						4	2	2	27.3	16.7	16.7	23.098	0	37564000	5	3	2	2	0	7.37088	7.14839	n. def.	n. def.	D3YUS0;Q3TT92;Q62188;E9PWE8;Q3TAS8;D3Z567;P97427;Q3TXY0;Q6P1J1	D3YUS0;Q3TT92;Q62188;E9PWE8;Q3TAS8	Dihydropyrimidinase-related protein 3	Dpysl3
n. def.	5.67445						1	1	1	12.5	12.5	12.5	14.703	0	3307900	1	0	1	0	1	n. def.	6.51955	n. def.	n. def.	M0QWD1;D3Z730;Q3UUT0;G3X9H1;D3Z729;Q0P688;Q8BMB3;Q80ZJ3;D3YUV9	M0QWD1;D3Z730;Q3UUT0;G3X9H1;D3Z729;Q0P688;Q8BMB3;Q80ZJ3;D3YUV9	Eukaryotic translation initiation factor 4E type 2	Eif4e2
n. def.	5.88283						2	2	1	14.1	14.1	8.7	24.108	0.0060286	10690000	1	0	1	0	1	n. def.	7.02898	n. def.	n. def.	D3Z1R9;D3YV99;F6QTS1;Q3TIJ1;Q14AI7;O88544	D3Z1R9;D3YV99;F6QTS1;Q3TIJ1;Q14AI7;O88544	COP9 signalosome complex subunit 4	Cops4
n. def.	5.58878						2	2	2	17.2	17.2	17.2	20.243	0.0032336	4267400	2	1	1	1	1	n. def.	6.63016	n. def.	n. def.	D3YVA2;Q91X97;D3Z2Z8;E9PV73;P84075	D3YVA2;Q91X97;D3Z2Z8;E9PV73;P84075	Neurocalcin-delta;Neuron-specific calcium-binding protein hippocalcin	Ncald;Hpca
n. def.	6.62759						1	1	1	17.7	17.7	17.7	8.6438	0.0024979	16969000	1	0	1	0	1	n. def.	7.22966	n. def.	n. def.	D3Z0S0;D3YVI6;D3Z440;Q9CZ04;Q9CZ04-2	D3Z0S0;D3YVI6;D3Z440;Q9CZ04;Q9CZ04-2	COP9 signalosome complex subunit 7a	Cops7a
n. def.	6.16486						1	1	1	20	20	20	11.245	0	7308500	1	0	1	0	1	n. def.	6.86383	n. def.	n. def.	D3Z7K0;D3YWF6;Q7TQI3	D3Z7K0;D3YWF6;Q7TQI3	Ubiquitin thioesterase OTUB1	Otub1
6.08282	6.32125						1	1	1	15.4	15.4	15.4	9.7982	0	16527000	3	1	1	1	1	6.78178	7.0202	n. def.	n. def.	Q9JJV2-3;D3YWS3;Q9JJV2;Q9JJV2-2	Q9JJV2-3;D3YWS3;Q9JJV2;Q9JJV2-2	Profilin-2;Profilin	Pfn2
n. def.	6.2977						2	2	2	18.6	18.6	18.6	24.663	0	23816000	3	0	2	0	2	n. def.	7.37687	n. def.	n. def.	Q3T9J2;D3YX49;E9QAR4;E9QAR1;E9QAR6;E9Q1A5;Q6P3F1;Q3U1E7;A9X427;A9X426;Q8C3E0	Q3T9J2;D3YX49;E9QAR4;E9QAR1;E9QAR6;E9Q1A5;Q6P3F1;Q3U1E7;A9X427;A9X426;Q8C3E0		Zfp384
n. def.	n. def.						1	1	1	5.1	5.1	5.1	31.659	0.0058013	0	1	0	1	0	1	n. def.	n. def.	n. def.	n. def.	Q4FZG5;D3YXG6;Q9CVB6;Q3UA52	Q4FZG5;D3YXG6;Q9CVB6;Q3UA52	Actin-related protein 2/3 complex subunit 2	Arpc2
n. def.	6.65956						1	1	1	10.8	10.8	10.8	35.073	0.0084329	82194000	1	0	1	0	1	n. def.	7.91484	n. def.	n. def.	Q8C1L9;D3YXI6	Q8C1L9;D3YXI6		Setd8
n. def.	4.64408						2	2	2	3.3	3.3	3.3	105.1	0	1586300	3	1	2	1	2	n. def.	6.20039	n. def.	n. def.	D3YXK2;S4R1M2;Q6A0C0;Q80YR5	D3YXK2;S4R1M2;Q6A0C0;Q80YR5	Scaffold attachment factor B1;Scaffold attachment factor B2	Safb;Safb2
n. def.	5.54974						1	1	1	3.1	3.1	3.1	64.273	0	10283000	2	0	1	0	1	n. def.	7.01212	n. def.	n. def.	Q8BJZ0;Q6PD13;Q4FJS3;Q3UKS1;D3YY85;Q8R5C8;D3YXX1;D3YY86	Q8BJZ0;Q6PD13;Q4FJS3;Q3UKS1;D3YY85;Q8R5C8;D3YXX1;D3YY86	Zinc finger MYND domain-containing protein 11	Zmynd11
n. def.	5.89843						2	2	2	16	16	16	23.778	0	8706100	3	0	2	0	2	n. def.	6.93982	n. def.	n. def.	D3YY02;D3Z4H6;Q564E7;P52912	D3YY02;D3Z4H6;Q564E7;P52912	Nucleolysin TIA-1	Tia1
n. def.	n. def.	+					1	1	1	1.4	1.4	1.4	110.14	1	0	1	0	1	0	1	n. def.	n. def.	n. def.	n. def.	D3YY41;P42337	D3YY41;P42337	Phosphatidylinositol 4,5-bisphosphate 3-kinase catalytic subunit alpha isoform	Pik3ca
n. def.	5.2183						1	1	1	6.6	6.6	6.6	54.476	0.006015	4298000	1	0	1	0	1	n. def.	6.63327	n. def.	n. def.	O88974-3;O88974;G5E8N3;O88974-4;D3YYC3	O88974-3;O88974;G5E8N3;O88974-4;D3YYC3	Histone-lysine N-methyltransferase SETDB1	Setdb1
7.2036	7.60367						9	9	9	41.2	41.2	41.2	20.413	0	505170000	21	6	9	6	9	8.15785	8.55792	n. def.	n. def.	D3YYM6;D3Z1S8;Q91V55;P97461	D3YYM6;D3Z1S8;Q91V55;P97461	40S ribosomal protein S5;40S ribosomal protein S5, N-terminally processed	Rps5
5.12753	5.62008						1	1	1	5.4	5.4	5.4	22.889	0.0064424	6061900	2	1	1	1	1	6.16891	6.66148	n. def.	n. def.	D3Z478;D3YYS7;Q9D0L8-2;Q9D0L8-3;Q9D0L8	D3Z478;D3YYS7;Q9D0L8-2;Q9D0L8-3;Q9D0L8	mRNA cap guanine-N7 methyltransferase	Rnmt
n. def.	6.30112						3	3	3	10.1	10.1	10.1	59.715	0	54011000	3	0	3	0	3	n. def.	7.73248	n. def.	n. def.	Q922P9;D3YYT1	Q922P9;D3YYT1	Putative oxidoreductase GLYR1	Glyr1
n. def.	5.17829						5	5	5	4.4	4.4	4.4	212.33	0	14172000	6	0	5	0	5	n. def.	7.15143	n. def.	n. def.	D3YZ62;Q99104;D3Z4J3;F6Z2S4;B8JK05;F6TDE5;Q8BWY8;E9Q1F5;A0A1L1SUF0;P21271;G5E8G6;P21271-3;G3X9Y9	D3YZ62;Q99104;D3Z4J3	Unconventional myosin-Va	Myo5a
5.92347	6.32675						5	5	5	16.1	16.1	16.1	59.656	0	47367000	6	3	4	3	4	7.12759	7.53087	n. def.	n. def.	Q64213-2;E9Q4Q2;D3YZC9;D3YZD0;Q64213-3;Q3UK67;Q3UI45;Q64213;Q3TZI3;D3YVH4;F8WHF9	Q64213-2;E9Q4Q2;D3YZC9;D3YZD0;Q64213-3;Q3UK67;Q3UI45;Q64213;Q3TZI3;D3YVH4	Splicing factor 1	Sf1
n. def.	5.41494						1	1	1	4.7	4.7	4.7	41.683	0	5199600	2	0	1	0	1	n. def.	6.71597	n. def.	n. def.	D3YZJ1;Q64337-2;Q64337	D3YZJ1;Q64337-2;Q64337	Sequestosome-1	Sqstm1
n. def.	n. def.						1	1	1	4.4	4.4	4.4	29.998	0.00085837	0	2	1	0	1	0	n. def.	n. def.	n. def.	n. def.	D3YZN8;D6RIN1;Q99KD5	D3YZN8;D6RIN1;Q99KD5	Protein unc-45 homolog A	Unc45a
5.43274	6.22277						1	1	1	11.3	11.3	11.3	11.465	0	11646000	4	1	1	1	1	6.21091	7.00091	n. def.	n. def.	D3Z036;Q8BX58;Q3UQL2;O88543	D3Z036;Q8BX58;Q3UQL2;O88543	COP9 signalosome complex subunit 3	Cops3
n. def.	7.7522	+					1	1	1	1.7	1.7	1.7	127.17	1	3447800000	1	0	1	0	1	n. def.	9.53754	148	510	D3Z069;Q8K1N2;Q8K1N2-2	D3Z069;Q8K1N2;Q8K1N2-2	Pleckstrin homology-like domain family B member 2	Phldb2
n. def.	5.87896						1	1	1	6.2	6.2	6.2	26.028	0	8324400	2	0	1	0	1	n. def.	6.92035	n. def.	n. def.	D3Z0D8;Q3THV8;P11157	D3Z0D8;Q3THV8;P11157	Ribonucleoside-diphosphate reductase subunit M2	Rrm2
n. def.	4.1262						2	2	2	2.8	2.8	2.8	95.493	0.0032706	588370	2	0	2	0	2	n. def.	5.76965	n. def.	n. def.	D3Z0M9	D3Z0M9		Ddx23
5.63499	6.30079						2	2	2	16.6	16.6	16.6	27.372	0.00086505	21874000	2	1	1	1	1	6.58923	7.25503	n. def.	n. def.	D3Z0S6;Q62189;D6RI83;Q9CXX7	D3Z0S6;Q62189;D6RI83;Q9CXX7	U1 small nuclear ribonucleoprotein A	Snrpa
n. def.	5.46271						3	3	3	16.5	16.5	16.5	22.494	0	4062900	3	0	3	0	3	n. def.	6.60884	n. def.	n. def.	D3Z0Y2;Q6GT24;Q53ZU7;O08709;Q6A0D0;Q8BPD3	D3Z0Y2;Q6GT24;Q53ZU7;O08709;Q6A0D0;Q8BPD3	Peroxiredoxin-6	Prdx6
5.5374	5.88451						1	1	1	7.5	7.5	7.5	22.251	0.00084531	10001000	1	1	1	1	1	6.49164	6.83875	n. def.	n. def.	D3Z409;F6WV69;Q3UGB1;F7BIK4;Q80XR8;J3QK07;D3Z1I2;Q9JLQ2;Q5DU47;E9PVA6;Q5F258;Q68FF6	D3Z409;F6WV69;Q3UGB1;F7BIK4;Q80XR8;J3QK07;D3Z1I2;Q9JLQ2;Q5DU47;E9PVA6;Q5F258;Q68FF6	ARF GTPase-activating protein GIT2;ARF GTPase-activating protein GIT1	Git2;Git1
5.58284	n. def.	+					1	1	1	20	20	20	8.3684	1	1913400	1	1	0	1	0	6.28181	n. def.	149	13	D3Z1J4;Q921B4-2;Q921B4;Q923B3	D3Z1J4;Q921B4-2;Q921B4;Q923B3	Neurotrophin receptor-interacting factor 2;Neurotrophin receptor-interacting factor 1	Zfp369;Nrif2;Nrif1
6.8353	7.09496						5	5	3	34.6	34.6	25	20.785	0	154310000	9	4	4	3	2	7.73839	7.99806	n. def.	n. def.	D3Z1T4;D3Z1M1;Q3U9V4;P62880;E9QKR0;D3YZX3;Q3U2F9;Q3TY18;Q3THF3;P29387;A0A0A6YVN9;V9GWY1;E9PWM7	D3Z1T4;D3Z1M1;Q3U9V4;P62880;E9QKR0;D3YZX3;Q3U2F9;Q3TY18;Q3THF3;P29387	Guanine nucleotide-binding protein G(I)/G(S)/G(T) subunit beta-2;Guanine nucleotide-binding protein subunit beta-4	Gnb2;Gnb4
5.63261	5.85687				OLIG2		5	5	5	9.4	9.4	9.4	92.477	0	48232000	4	1	4	1	4	7.25585	7.48011	n. def.	n. def.	E9Q986;D3Z7H6;Q3TPD1;E9Q906;E9Q907;E9Q905;E9Q8Z4;E9Q8Z9;D3Z2H2;E9Q903;E9Q901;P30999-2;E9Q904;P30999-3;G3X9V2;P30999;E9Q8Z5;E9Q8Z6;E9Q8Z8;Q3UF77;D3Z2H7	E9Q986;D3Z7H6;Q3TPD1;E9Q906;E9Q907;E9Q905;E9Q8Z4;E9Q8Z9;D3Z2H2;E9Q903;E9Q901;P30999-2;E9Q904;P30999-3;G3X9V2;P30999;E9Q8Z5;E9Q8Z6;E9Q8Z8;Q3UF77;D3Z2H7	Catenin delta-1	Ctnnd1
5.15354	5.81443						2	2	2	9.7	9.7	9.7	29.591	0	13510000	5	1	2	1	2	6.38399	7.04489	n. def.	n. def.	D3Z2J6;Q9D710;D3YYX0	D3Z2J6;Q9D710;D3YYX0	Thioredoxin-related transmembrane protein 2	Tmx2
n. def.	6.24373						1	1	1	21	21	21	12.628	0	12270000	1	0	1	0	1	n. def.	7.08884	n. def.	n. def.	E9PY18;E9Q754;D3Z2U5;E9PW85;Q8K3G5;Q3TAR6	E9PY18;E9Q754;D3Z2U5;E9PW85;Q8K3G5;Q3TAR6	Inactive serine/threonine-protein kinase VRK3	Vrk3
n. def.	6.10096						1	1	1	19.6	19.6	19.6	12.111	0.0060105	6308500	2	0	1	0	1	n. def.	6.79993	n. def.	n. def.	E9Q6I5;D3Z315;O89079	E9Q6I5;D3Z315;O89079	Coatomer subunit epsilon	Cope
5.83305	6.53328						3	3	3	11.7	11.7	11.7	37.667	0	45044000	7	1	3	1	3	6.87445	7.57467	n. def.	n. def.	Q07646-2;Q07646;D3Z383	Q07646-2;Q07646;D3Z383	Mesoderm-specific transcript protein	Mest
5.27163	6.23487						4	2	2	13.9	8.4	8.4	43.066	0.005439	41894000	4	1	3	1	1	6.61405	7.57728	n. def.	n. def.	Q63844;D3Z3G6;A0A0U1RPX4	Q63844;D3Z3G6;A0A0U1RPX4	Mitogen-activated protein kinase 3	Mapk3
5.73529	n. def.						1	1	1	22.1	22.1	22.1	10.167	0.0032362	2718000	1	1	0	1	0	6.43425	n. def.	n. def.	n. def.	F6XLZ3;D3Z3S1;Q9WUQ2;Q3UAP1	F6XLZ3;D3Z3S1;Q9WUQ2;Q3UAP1	Prolactin regulatory element-binding protein	Preb
n. def.	5.39707						2	2	2	10.1	10.1	10.1	32.745	0	4491100	2	0	2	0	2	n. def.	6.65235	n. def.	n. def.	D3Z494;Q8BIV6;G5E895;Q8R318;S4R2G9;P45377	D3Z494;Q8BIV6;G5E895;Q8R318;S4R2G9;P45377	Aldose reductase-related protein 2	Akr1b10;Akr1b8
4.13443	n. def.						1	1	1	1.1	1.1	1.1	112.53	0.005291	790410	1	1	0	1	0	5.89785	n. def.	n. def.	n. def.	D3Z5I1	D3Z5I1		Zc3hav1
n. def.	5.87779				OLIG2		1	1	1	2.3	2.3	2.3	44.229	0.00089606	16604000	1	0	1	0	1	n. def.	7.22021	n. def.	n. def.	Q61103;Q3UKV4;D3Z5N6	Q61103;Q3UKV4;D3Z5N6	Zinc finger protein ubi-d4	Dpf2
n. def.	4.71742						1	1	1	1.2	1.2	1.2	73.258	0.0084507	1617300	1	0	1	0	1	n. def.	6.20879	n. def.	n. def.	Q8C4V1-3;Q8C4V1-2;D3Z5T4;Q8C4V1;G3X9N1	Q8C4V1-3;Q8C4V1-2;D3Z5T4;Q8C4V1;G3X9N1	Rho GTPase-activating protein 24	Arhgap24
n. def.	n. def.	+					1	1	1	2.4	2.4	2.4	71.182	1	0	1	1	0	1	0	n. def.	n. def.	n. def.	n. def.	Q8BLA1;E9QNI0;E9Q8C0;D3Z6E8	Q8BLA1;E9QNI0;E9Q8C0;D3Z6E8	Deleted in lung and esophageal cancer protein 1 homolog	Dlec1
6.75902	7.18614						14	14	14	30.2	30.2	30.2	54.594	0	590580000	29	11	13	11	13	8.20618	8.63329	n. def.	n. def.	D3Z6F5;Q03265;Q3U452;D6RJ16	D3Z6F5;Q03265	ATP synthase subunit alpha;ATP synthase subunit alpha, mitochondrial	Atp5a1
n. def.	5.00424	+					1	1	1	6.2	6.2	6.2	24.506	1	1110700	0	0	1	0	1	n. def.	6.0456	n. def.	n. def.	D3Z6V5;Q3U1U6;Q3TCX6	D3Z6V5;Q3U1U6;Q3TCX6		Tsc22d4
n. def.	5.27894						1	1	1	5.2	5.2	5.2	42.291	0	4371900	2	0	1	0	1	n. def.	6.64067	n. def.	n. def.	D3Z6W2;Q06180-2;Q06180	D3Z6W2;Q06180-2;Q06180	Tyrosine-protein phosphatase non-receptor type;Tyrosine-protein phosphatase non-receptor type 2	Ptpn2
n. def.	5.30619						1	1	1	4.9	4.9	4.9	57.97	0.0008726	4654900	2	0	1	0	1	n. def.	6.66791	n. def.	n. def.	D3Z700;F6YA33;Q8K223;E9Q6K1;Q3UKK7;O08811	D3Z700;F6YA33;Q8K223;E9Q6K1;Q3UKK7;O08811	TFIIH basal transcription factor complex helicase XPD subunit	Ercc2
4.86172	5.26321						2	2	2	6.2	6.2	6.2	50.98	0	6913300	2	1	1	1	1	6.2931	6.69457	n. def.	n. def.	D3Z783;Q8BS26;P31750;D3Z5X2;D3Z490;D3YYP9;D3YXX3;D3YXM7;D3Z3N2;F8WHG5;Q9WUA6-2;Q9WUA6;Q6NXW0;Q60823;Q3TY95	D3Z783;Q8BS26;P31750;D3Z5X2;D3Z490;D3YYP9;D3YXX3;D3YXM7;D3Z3N2;F8WHG5;Q9WUA6-2;Q9WUA6;Q6NXW0;Q60823;Q3TY95	RAC-alpha serine/threonine-protein kinase;RAC-gamma serine/threonine-protein kinase;RAC-beta serine/threonine-protein kinase	Akt1;Akt2;Akt3
7.40175	8.36014						4	4	3	60.4	60.4	37.7	6.0139	0	508770000	10	2	4	2	3	7.70278	8.66118	n. def.	n. def.	H7BWX9;D3Z794;P61957;G3UZX6;Q9Z172-2;G3UZA7	H7BWX9;D3Z794;P61957	Small ubiquitin-related modifier 2	Sumo2
4.83617	5.99637						2	2	2	10.4	10.4	10.4	30.54	0	14844000	3	1	2	1	2	5.98229	7.14248	n. def.	n. def.	D3Z795;Q9JK23;D6RG59	D3Z795;Q9JK23;D6RG59	Proteasome assembly chaperone 1	Psmg1
n. def.	n. def.	+					1	1	1	2	2	2	102.04	1	0	1	0	1	0	1	n. def.	n. def.	n. def.	n. def.	Q8BWY9;D3Z7B5	Q8BWY9;D3Z7B5	Protein CIP2A	Kiaa1524;C330027C09Rik
n. def.	7.2443						4	4	4	30	30	30	14.982	0	140410000	8	0	4	0	4	n. def.	8.1474	n. def.	n. def.	D3Z7C6;Q9CRH1;Q9R0Q7;Q3TJG6	D3Z7C6;Q9CRH1;Q9R0Q7;Q3TJG6	Prostaglandin E synthase 3	Ptges3
n. def.	n. def.						1	1	1	1.6	1.6	1.6	104.23	0	0	1	0	1	0	1	n. def.	n. def.	n. def.	n. def.	Q3UX52;Q3UQJ7;Q8CHD7;G3X922;D4AFX7	Q3UX52;Q3UQJ7;Q8CHD7;G3X922;D4AFX7		Dnajc13
n. def.	n. def.						2	2	2	5.5	5.5	5.5	54.769	0.00085324	0	2	0	2	0	2	n. def.	n. def.	n. def.	n. def.	D6REF7;Q8R0X7;Q4FK38;Q3UDJ2;Q69ZN1;D3YZT4	D6REF7;Q8R0X7;Q4FK38;Q3UDJ2;Q69ZN1;D3YZT4	Sphingosine-1-phosphate lyase 1	Sgpl1
n. def.	6.49965						1	1	1	23.3	23.3	23.3	4.9128	0.00087413	9479200	2	1	1	1	1	n. def.	6.97677	n. def.	n. def.	D6REV5;P70122	D6REV5;P70122	Ribosome maturation protein SBDS	Sbds
n. def.	n. def.						1	1	1	4.3	4.3	4.3	26.649	0	0	1	0	1	0	1	n. def.	n. def.	n. def.	n. def.	D6RG49;Q80XP8	D6RG49;Q80XP8	Protein FAM76B	Fam76b
n. def.	5.35562	+					1	1	1	6.3	6.3	6.3	30.972	1	3175000	1	0	1	0	1	n. def.	6.50174	n. def.	n. def.	Q9EQZ7-2;Q6ZQ55;Q9EQZ7-3;Q9EQZ7;Q0VF51;D9HP81	Q9EQZ7-2;Q6ZQ55;Q9EQZ7-3;Q9EQZ7;Q0VF51;D9HP81	Regulating synaptic membrane exocytosis protein 2	Rims2
5.96111	6.48538						6	6	6	23.7	23.7	23.7	52.396	0	111210000	11	4	5	4	5	7.40827	7.93254	n. def.	n. def.	D9J2Z9;Q8CI51;A0A0G2JGZ5;A0A0G2JEJ0;D9J300;D9J301;Q2Q7P0;D9J302;Q8VDV4	D9J2Z9;Q8CI51;A0A0G2JGZ5;A0A0G2JEJ0;D9J300;D9J301;Q2Q7P0;D9J302	PDZ and LIM domain protein 5	Pdlim5
5.74792	6.20745						3	3	3	21.5	21.5	21.5	17	0	17376000	4	1	3	1	3	6.65101	7.11056	n. def.	n. def.	E0CX20;Q6PGH1	E0CX20;Q6PGH1	Protein BUD31 homolog	Bud31
5.78063	6.58875						5	5	5	30	30	30	25.264	0	62759000	9	1	4	1	4	6.92676	7.73489	n. def.	n. def.	E0CXB1;Q9QUM9	E0CXB1;Q9QUM9	Proteasome subunit alpha type-6	Psma6
4.77477	5.83729						2	2	2	4.9	4.9	4.9	72.735	0	20918000	3	1	2	1	2	6.22194	7.28445	n. def.	n. def.	E0CXB2;Q4G0B8;E9QKZ2;Q91YE6;E0CY46	E0CXB2;Q4G0B8;E9QKZ2;Q91YE6;E0CY46	Importin-9	Ipo9
n. def.	5.99584						7	7	7	12.6	12.6	12.6	106.47	0	49523000	6	0	7	0	7	n. def.	7.69481	n. def.	n. def.	E0CXE7;Q5SUQ9-2;Q5SUQ9-3;Q5SUQ9	E0CXE7;Q5SUQ9-2;Q5SUQ9-3;Q5SUQ9	CST complex subunit CTC1	Ctc1
n. def.	5.88004						1	1	1	4.3	4.3	4.3	35.231	0	18966000	2	0	1	0	1	n. def.	7.27798	n. def.	n. def.	E0CXN5;P13707	E0CXN5;P13707	Glycerol-3-phosphate dehydrogenase [NAD(+)], cytoplasmic	Gpd1
5.65781	5.36459	+					1	1	1	2.1	2.1	2.1	60.3	1	16471000	0	1	1	1	1	7.03802	6.7448	158	464	E0CXQ2	E0CXQ2		A930017K11Rik
n. def.	6.80349						10	10	7	18.2	18.2	13.3	82.251	0	228980000	11	0	10	0	7	n. def.	8.3598	n. def.	n. def.	E0CXS2;F8WIE2;E0CXS9;Q08122-2;Q08122;Q08122-4;Q80TC1;F6TS96;Q3TY99;E0CXU1;E0CY14;Q08122-1;J3KMT7;E0CYM5;E0CY76;Q6PDS9;F6YM15;Q62440-4;F6X5U5	E0CXS2;F8WIE2;E0CXS9;Q08122-2;Q08122;Q08122-4;Q80TC1;F6TS96;Q3TY99;E0CXU1;E0CY14;Q08122-1;J3KMT7	Transducin-like enhancer protein 3	Tle3
n. def.	5.70818				OLIG2		1	1	1	13.8	13.8	13.8	15.316	0	4596500	1	0	1	0	1	n. def.	6.66243	n. def.	n. def.	E0CYH3;Q8K0L9-2;Q9QZF3;Q8K0L9	E0CYH3;Q8K0L9-2;Q9QZF3;Q8K0L9	Zinc finger and BTB domain-containing protein 20	Zbtb20
n. def.	5.46743				OLIG2		1	1	1	10.4	10.4	10.4	18.189	0	2933800	3	0	1	0	1	n. def.	6.46743	n. def.	n. def.	E0CYX5;Q8BK32;Q05CF0;Q05C35;Q5RIN0;E9Q8K6;E9Q2B2;Q5PRE9;Q5RIM6	E0CYX5;Q8BK32;Q05CF0;Q05C35;Q5RIN0;E9Q8K6;E9Q2B2;Q5PRE9;Q5RIM6		Ncor1
9.09781	9.25008						5	1	1	42.9	26.9	26.9	13.322	0.0058694	12125000000	19	5	4	1	1	9.69987	9.85214	n. def.	n. def.	E0CZ27;P84244;P02301	E0CZ27;P84244;P02301	Histone H3;Histone H3.3;Histone H3.3C	H3f3a;H3f3c
n. def.	5.5628						4	4	1	9.2	9.2	4.3	75.968	0	11328000	4	0	4	0	1	n. def.	7.05415	n. def.	n. def.	F8VQ42;P28740;P28740-1;E0CZ72;Q9D481	F8VQ42;P28740;P28740-1;E0CZ72	Kinesin-like protein KIF2A	Kif2a
n. def.	n. def.	+					1	1	1	1.5	1.5	1.5	185.49	1	0	1	1	0	1	0	n. def.	n. def.	159	532	E5FYH1	E5FYH1	Testis- and ovary-specific PAZ domain-containing protein 1	Topaz1
n. def.	n. def.	+					1	1	1	0.7	0.7	0.7	167.15	1	0	1	1	0	1	0	n. def.	n. def.	160	582	E9PUA2;Q5BLK4	E9PUA2;Q5BLK4	Terminal uridylyltransferase 7	Zcchc6
n. def.	4.79175						1	1	1	4.6	4.6	4.6	55.023	0.0032733	1981100	1	0	1	0	1	n. def.	6.29691	n. def.	n. def.	Q5BJ94;E9PUA5	Q5BJ94;E9PUA5		Kifc1;Kifc5b
n. def.	5.7815						4	4	4	8.9	8.9	8.9	63.301	0	18139000	5	0	4	0	4	n. def.	7.25861	n. def.	n. def.	Q8BNV1;Q05BM5;Q3UYU2;E9PUQ7;Q3UJM1;F6ZHN3	Q8BNV1;Q05BM5;Q3UYU2;E9PUQ7;Q3UJM1;F6ZHN3	tRNA (uracil-5-)-methyltransferase homolog A	Trmt2a
n. def.	n. def.	+					1	1	1	1.3	1.3	1.3	114.9	1	0	1	1	0	1	0	n. def.	n. def.	161	266	Q6A0B7;E9PUQ8	Q6A0B7;E9PUQ8		Dgkd
4.47561	5.6735						2	2	2	6.5	6.5	6.5	40.161	0	10028000	2	1	1	1	1	5.77665	6.97453	n. def.	n. def.	Q8BYN6;E9Q6Z0;Q9D5V5;Q2M4H5;E9PV12;G3X914	Q8BYN6;E9Q6Z0;Q9D5V5;Q2M4H5;E9PV12;G3X914	Cullin-5	Cul5
4.23576	5.45411						7	7	7	3.4	3.4	3.4	292.99	0	49484000	9	1	7	1	7	6.4506	7.66895	n. def.	n. def.	Q3UHQ5;E9PVA8;Q6PGM5;Q8CHH7;Q8BIX2;Q3U3Z4;Q6NV94;Q640Q4	Q3UHQ5;E9PVA8;Q6PGM5;Q8CHH7		Gcn1l1
n. def.	6.03056	+					1	1	1	6.5	6.5	6.5	27.669	1	12874000	1	0	1	0	1	n. def.	7.10971	n. def.	n. def.	Q3UTY3;Q3TPN7;E9PVI4;O08747;Q3URW2;Q3UQ08;O08747-2	Q3UTY3;Q3TPN7;E9PVI4;O08747;Q3URW2;Q3UQ08;O08747-2	Netrin receptor UNC5C	Unc5c
n. def.	5.71273						2	2	2	7.1	7.1	7.1	49.444	0.0059391	13935000	2	0	2	0	2	n. def.	7.14411	n. def.	n. def.	E9Q7S4;E9PZE9;Q91WJ7-2;Q91WJ7;E9PVQ3	E9Q7S4;E9PZE9;Q91WJ7-2;Q91WJ7;E9PVQ3	SPATS2-like protein	Spats2l
5.08575	5.95185						13	13	13	7.6	7.6	7.6	324.71	0	144400000	19	4	11	4	11	7.23805	8.10415	n. def.	n. def.	E9PVX6-2;E9PVX6	E9PVX6-2;E9PVX6		Mki67
n. def.	5.47975						2	2	2	4.6	4.6	4.6	80.292	0	10866000	3	0	2	0	2	n. def.	7.03607	n. def.	n. def.	E9PW15;Q80U70;Q3UX45;Q5XG68	E9PW15;Q80U70;Q3UX45;Q5XG68	Polycomb protein Suz12	Suz12
5.58247	6.59385						2	2	2	10.8	10.8	10.8	33.485	0	34460000	5	1	2	1	2	6.48557	7.49694	n. def.	n. def.	Q9CSP8;Q3TF41;Q8BSH9;P28656;E9PW66	Q9CSP8;Q3TF41;Q8BSH9;P28656;E9PW66	Nucleosome assembly protein 1-like 1	Nap1l1
n. def.	6.26267						2	2	2	13.7	13.7	13.7	15.7	0	10986000	4	1	2	1	2	n. def.	7.04084	n. def.	n. def.	E9Q0X0;E9PW69;Q3TL95;Q9R1P0;Q3UCF0	E9Q0X0;E9PW69;Q3TL95;Q9R1P0;Q3UCF0	Proteasome subunit alpha type;Proteasome subunit alpha type-4	Psma4
5.48989	6.33672						1	1	1	6.9	6.9	6.9	24.021	0	29763000	2	1	1	1	1	6.56907	7.41589	n. def.	n. def.	Q3TVX1;Q8BK63-2;Q6PJ87;Q3U844;H7BXB1;E9Q4G7;Q8BK63;Q3U772;E9Q2U6;E9Q3W1;E9PWB2	Q3TVX1;Q8BK63-2;Q6PJ87;Q3U844;H7BXB1;E9Q4G7;Q8BK63;Q3U772;E9Q2U6;E9Q3W1;E9PWB2	Casein kinase I isoform alpha	Csnk1a1
5.7497	6.08228						2	2	2	7	7	7	50.96	0	47805000	3	1	2	1	2	7.18107	7.51364	n. def.	n. def.	Q6PEV0;E9PWK1;Q9D379;Q8K2W5	Q6PEV0;E9PWK1;Q9D379;Q8K2W5	Epoxide hydrolase 1	Ephx1
6.15564	n. def.	+					1	1	1	3.1	3.1	3.1	69.37	1	37206000	1	1	0	1	0	7.57061	n. def.	n. def.	n. def.	Q8BSM2;Q14B74;Q8BLI0;E9PWW5	Q8BSM2;Q14B74;Q8BLI0;E9PWW5	ADAMTS-like protein 1	Adamtsl1
n. def.	n. def.						1	1	1	1.4	1.4	1.4	109.58	0.005364	0	1	1	0	1	0	n. def.	n. def.	n. def.	n. def.	Q3V3T8;Q3UJ04;E9PWW9	Q3V3T8;Q3UJ04;E9PWW9		Rsf1
5.43906	6.44736						5	5	5	22.3	22.3	22.3	31.934	0	46141000	6	1	5	1	5	6.61516	7.62345	n. def.	n. def.	Q8BJG2;E9PWY9;Q8C0C7;Q3U0Y9;Q4FJQ2;Q8BXN0;D6RIJ2	Q8BJG2;E9PWY9;Q8C0C7;Q3U0Y9;Q4FJQ2;Q8BXN0	Phenylalanine--tRNA ligase alpha subunit	Farsa
6.15214	6.74886				TCF4		11	9	9	23.3	21.2	21.2	71.082	0	253010000	17	5	11	4	9	7.70844	8.30516	n. def.	n. def.	M1VB37;M1VHG3;F8WHY8;M1VHG6;Q2KHS8;E9PX23;Q8K4B0;M1VHG1;M1VMF6;M1VQI8;M1V1V1;M1VQI9;Q924K8-2;Q3UKM9;Q3U3A7;E9Q794;A4FTZ3;Q6ZPV1;Q3UII8;Q924K8	M1VB37;M1VHG3;F8WHY8;M1VHG6;Q2KHS8;E9PX23;Q8K4B0;M1VHG1;M1VMF6;M1VQI8;M1V1V1	Metastasis-associated protein MTA1	Mta1
4.60834	5.2394				OLIG2		4	4	4	2.8	2.8	2.8	245.03	0	25266000	5	2	3	2	3	6.68023	7.31129	n. def.	n. def.	Q9WU42-2;E9Q9V3;E9PY55;Q9WU42;E9Q701;F8VQL9;F6Z4B2;A0A0G2JEQ5;Q3TZ10;Q80ZV7;D3Z2J5	Q9WU42-2;E9Q9V3;E9PY55;Q9WU42;E9Q701;F8VQL9;F6Z4B2	Nuclear receptor corepressor 2	Ncor2
5.77978	6.48775						5	5	5	25.6	25.6	25.6	29.929	0	55148000	6	2	5	2	5	6.95587	7.66383	n. def.	n. def.	P10711-2;Q3UWX7;P10711;E9PYD5;Q3UPE0;Q3UV78;B7ZCS4;F6XMY4;Q9QVN7;Q810R3	P10711-2;Q3UWX7;P10711;E9PYD5;Q3UPE0	Transcription elongation factor A protein 1	Tcea1
n. def.	5.59601						1	1	1	5.2	5.2	5.2	52.233	0	9861700	1	0	1	0	1	n. def.	6.99395	n. def.	n. def.	Q80UN0;E9PYI8;Q9JMA1	Q80UN0;E9PYI8;Q9JMA1	Ubiquitin carboxyl-terminal hydrolase;Ubiquitin carboxyl-terminal hydrolase 14	Usp14
7.26884	7.60007						4	4	4	27.5	27.5	27.5	20.252	0	583880000	8	3	4	3	4	8.26884	8.60007	n. def.	n. def.	Q9CXW4;E9PYL9;Q8VC94;A2BH06;E9PZB3	Q9CXW4;E9PYL9;Q8VC94;A2BH06;E9PZB3	60S ribosomal protein L11	Rpl11;Gm10036;Gm5093
5.93827	n. def.	+					1	1	1	2	2	2	94.046	1	26893000	1	1	0	1	0	7.42964	n. def.	164	166	E9PZK8;E9QAZ9	E9PZK8;E9QAZ9		Vmn2r94;Vmn2r100
5.46075	5.49369						1	1	1	7.4	7.4	7.4	29.605	0	9609000	2	1	1	1	1	6.66486	6.69781	n. def.	n. def.	Q542X6;P47758;E9Q035	Q542X6;P47758;E9Q035	Signal recognition particle receptor subunit beta	Srprb;Gm20425
n. def.	5.43091						1	1	1	3.3	3.3	3.3	73.436	0	6473200	2	0	1	0	1	n. def.	6.81112	n. def.	n. def.	Q3UT02;E9Q066;Q8BWW4;G3X9Q6	Q3UT02;E9Q066;Q8BWW4;G3X9Q6	La-related protein 4	Larp4
n. def.	5.45425						1	1	1	2.3	2.3	2.3	83.015	0.0032626	10531000	0	0	1	0	1	n. def.	7.02247	n. def.	n. def.	Q4KMM3-3;Q4KMM3-2;E9Q0A7;Q4KMM3-4;Q4KMM3	Q4KMM3-3;Q4KMM3-2;E9Q0A7;Q4KMM3-4;Q4KMM3	Oxidation resistance protein 1	Oxr1
8.23661	8.57849						8	8	8	56.1	56.1	56.1	14.894	0	3859100000	26	7	7	7	7	9.08171	9.42359	n. def.	n. def.	Q5NDA4;P51880;E9Q0H6	Q5NDA4;P51880;E9Q0H6	Fatty acid-binding protein, brain	Fabp7
5.38414	5.79227						5	5	4	7.2	7.2	5.5	91.696	0	39652000	7	3	3	3	2	7.04689	7.45503	n. def.	n. def.	Q61699-2;E9Q0U7;Q61699;D3Z027;A0A0J9YTZ7;D3Z3I9;E0CY23;P48722-2;P48722	Q61699-2;E9Q0U7;Q61699;D3Z027	Heat shock protein 105 kDa	Hsph1
6.7062	7.18636						2	2	2	30.8	30.8	30.8	6.1593	0	61329000	4	2	2	2	2	7.18333	7.66348	n. def.	n. def.	E9Q0W8;E9Q4F4;P62305	E9Q0W8;E9Q4F4;P62305	Small nuclear ribonucleoprotein E	Snrpe
n. def.	5.81943						1	1	1	10.5	10.5	10.5	15.224	0	5938500	1	0	1	0	1	n. def.	6.77368	n. def.	n. def.	E9Q109;Q9CXK8	E9Q109;Q9CXK8	60S ribosome subunit biogenesis protein NIP7 homolog	Nip7
n. def.	5.67205						1	1	1	10.4	10.4	10.4	22.628	0	3289700	1	0	1	0	1	n. def.	6.51716	n. def.	n. def.	Q8R2Y9;E9Q199	Q8R2Y9;E9Q199	SOSS complex subunit B1	Nabp2
6.61414	7.12711						11	11	11	27.3	27.3	27.3	48.754	0	367770000	19	6	10	6	10	7.93635	8.44932	n. def.	n. def.	Q8C2A3;Q3UNN1;O55131;E9Q9F5;E9Q1G8;Q5DTS3;Q8C752;Q3UGE0	Q8C2A3;Q3UNN1;O55131;E9Q9F5;E9Q1G8;Q5DTS3	Septin-7	2007-09-01
n. def.	5.89433						2	2	2	8.4	8.4	8.4	59.291	0	23521000	3	0	2	0	2	n. def.	7.37146	n. def.	n. def.	E9Q1P8	E9Q1P8	Interferon regulatory factor 2-binding protein 2	Irf2bp2
n. def.	n. def.	+					1	1	1	5.9	5.9	5.9	28.229	1	0	1	1	0	1	0	n. def.	n. def.	n. def.	n. def.	Q3TQ81;Q3UVX2;E9Q1R7;Q3TRA4;E9Q2Y4;Q6P1D6;Q3UHH6;Q60610;G3UWG2	Q3TQ81;Q3UVX2;E9Q1R7;Q3TRA4;E9Q2Y4;Q6P1D6;Q3UHH6;Q60610;G3UWG2	T-lymphoma invasion and metastasis-inducing protein 1	Tiam1
5.20469	6.14129						5	5	4	9.5	9.5	7.1	82.955	0	57153000	9	4	3	3	2	6.77288	7.70948	n. def.	n. def.	E9Q1S3;Q8C1E4;Q01405;Q8CDS4	E9Q1S3;Q8C1E4;Q01405	Protein transport protein Sec23A	Sec23a
n. def.	6.2668						6	6	6	8.1	8.1	8.1	103.89	0	88721000	5	0	6	0	6	n. def.	7.94803	n. def.	n. def.	E9Q1T9;Q9ERK4;E9QAX7;F6ZEW4	E9Q1T9;Q9ERK4;E9QAX7;F6ZEW4	Exportin-2	Cse1l
4.49213	n. def.	+					1	1	1	0.4	0.4	0.4	503.9	1	7018400	1	1	0	1	0	6.84624	n. def.	n. def.	n. def.	E9Q1Y3;E9Q414	E9Q1Y3;E9Q414	Apolipoprotein B-100;Apolipoprotein B-48	Apob
5.36959	5.87581						1	1	1	2.3	2.3	2.3	53.13	0.00084962	22666000	2	1	1	1	1	6.73131	7.23754	n. def.	n. def.	E9Q242;Q3TMB8;P54822	E9Q242;Q3TMB8;P54822	Adenylosuccinate lyase	Adsl
n. def.	n. def.						2	2	2	2.6	2.6	2.6	111.13	0	0	2	0	2	0	2	n. def.	n. def.	n. def.	n. def.	Q8C2G0;E9Q2A6;Q3UDE9;Q9QVP9;K7QD41;Q8C6R5;Q8C9L4;P34152-6;P34152-5;P34152-3;P34152-4;K7Q751;P34152-2;P34152	Q8C2G0;E9Q2A6;Q3UDE9;Q9QVP9;K7QD41;Q8C6R5;Q8C9L4;P34152-6;P34152-5;P34152-3;P34152-4;K7Q751;P34152-2;P34152	Protein-tyrosine kinase 2-beta;Focal adhesion kinase 1	Ptk2b;Ptk2
n. def.	4.43287				OLIG2		2	2	2	1.1	1.1	1.1	308.35	0	3549300	2	0	2	0	2	n. def.	6.55014	n. def.	n. def.	Q80TP3;E9Q2H1;Q8BJK5	Q80TP3;E9Q2H1;Q8BJK5	E3 ubiquitin-protein ligase UBR5	Ubr5
n. def.	4.5231						1	1	1	2	2	2	119.72	0	1700800	1	0	1	0	1	n. def.	6.23065	n. def.	n. def.	E9Q2I4	E9Q2I4		Elmsan1
6.24719	n. def.	+					1	1	1	12.3	12.3	12.3	14.533	1	12367000	1	1	0	1	0	7.09226	n. def.	171	11	Q80W79;E9Q2Q9;Q9WUZ7	Q80W79;E9Q2Q9;Q9WUZ7	SH3 domain-binding glutamic acid-rich protein	Sh3bgr
n. def.	6.19797						4	4	4	7.8	7.8	7.8	68.454	0	34705000	4	0	4	0	4	n. def.	7.54039	n. def.	n. def.	E9Q2S7;Q6P8K5	E9Q2S7		Zfp266
4.18859	5.64968						5	5	5	5.5	5.5	5.5	139.52	0	31401000	5	1	4	1	4	6.02111	7.48219	n. def.	n. def.	Q6P7V9;E9Q2X6;Q8CG47;Q3UZJ7;Q3U763;A0A0A6YXY3	Q6P7V9;E9Q2X6;Q8CG47;Q3UZJ7;Q3U763	Structural maintenance of chromosomes protein;Structural maintenance of chromosomes protein 4	Smc4
4.65562	n. def.						2	2	2	1.1	1.1	1.1	346.45	0.0059613	7828300	1	2	0	2	0	6.89367	n. def.	n. def.	n. def.	E9Q309	E9Q309		Cep350
n. def.	6.25986						2	2	2	4.8	4.8	4.8	70.564	0	18191000	3	1	2	1	2	n. def.	7.25986	n. def.	n. def.	H3BJQ1;Q7TN75;E9Q3F7	H3BJQ1;Q7TN75;E9Q3F7	Retrotransposon-derived protein PEG10	Peg10
n. def.	4.87172						1	1	1	1	1	1	152.07	0	4688800	1	0	1	0	1	n. def.	6.67106	n. def.	n. def.	Q80WR0;E9Q3G8	Q80WR0;E9Q3G8		Nup153
n. def.	6.55075						1	1	1	14	14	14	11.475	0.0064516	10663000	1	0	1	0	1	n. def.	7.02788	n. def.	n. def.	Q58E35;P47955;E9Q3T0	Q58E35;P47955;E9Q3T0	60S acidic ribosomal protein P1	Rplp1;Gm10073
6.61394	7.18381						10	10	10	44.9	44.9	44.9	36.978	0	387590000	21	6	9	6	9	7.91496	8.48483	n. def.	n. def.	E9Q3V6;P42208;F6WYM0;D3YYB1;D3Z3C0;F6UKN5;D3Z1S1;D3YZU7;D3YV76	E9Q3V6;P42208;F6WYM0;D3YYB1;D3Z3C0;F6UKN5;D3Z1S1	Septin-2	2002-09-01
n. def.	6.03371	+					1	1	1	2.7	2.7	2.7	59.058	1	29179000	1	0	1	0	1	n. def.	7.46507	172	265	P59438-3;P59438-2;Q6ZQ01;Q640Q9;E9Q3X4;P59438	P59438-3;P59438-2;Q6ZQ01;Q640Q9;E9Q3X4;P59438	Hermansky-Pudlak syndrome 5 protein homolog	Hps5
n. def.	5.52564						2	2	2	3	3	3	93.841	0.00088417	13083000	2	0	2	0	2	n. def.	7.11671	n. def.	n. def.	Q6P2K6;E9Q481;Q6P2K6-2	Q6P2K6;E9Q481;Q6P2K6-2	Serine/threonine-protein phosphatase 4 regulatory subunit 3A	Smek1
n. def.	5.70893				OLIG2		2	2	2	4.6	4.6	4.6	81.11	0	19441000	2	0	2	0	2	n. def.	7.28872	n. def.	n. def.	E9Q4T8;Q9JLV5;Q6ZQ84;F6UY44	E9Q4T8;Q9JLV5;Q6ZQ84;F6UY44	Cullin-3	Cul3
5.14687	n. def.						1	1	1	2.8	2.8	2.8	59.727	0.0083975	4067000	1	1	0	1	0	6.60927	n. def.	n. def.	n. def.	Q8C7M3-6;E9Q524;Q8C7M3-4;Q8C7M3-3;Q8C7M3-5;Q3TR28;E9QLH4;Q8C7M3-2;Q8C7M3	Q8C7M3-6;E9Q524;Q8C7M3-4;Q8C7M3-3;Q8C7M3-5;Q3TR28;E9QLH4;Q8C7M3-2;Q8C7M3	E3 ubiquitin-protein ligase TRIM9	Trim9
n. def.	5.55758						2	2	2	4.2	4.2	4.2	99.452	0.00087796	16609000	2	0	2	0	2	n. def.	7.22034	n. def.	n. def.	Q3UEQ4;Q3TTZ3;P46735-2;E9QNH6;E9Q580;P46735;Q7TQD7	Q3UEQ4;Q3TTZ3;P46735-2;E9QNH6;E9Q580;P46735;Q7TQD7	Unconventional myosin-Ib	Myo1b
n. def.	n. def.	+					1	1	1	25	25	25	5.4663	1	0	1	0	1	0	1	n. def.	n. def.	n. def.	n. def.	Q3TXD6;E9Q5G1;F8VQB6-2;Q80TR9;F8VQB6	Q3TXD6;E9Q5G1;F8VQB6-2;Q80TR9;F8VQB6	Unconventional myosin-X	Myo10
5.62736	6.49992						7	2	2	25.4	4.9	4.9	33.149	0	60956000	9	2	6	0	2	6.8578	7.73037	n. def.	n. def.	Q8K0Z5;E9Q5J9;A0A0R4J1P2;P21107;D3YVR0	Q8K0Z5;E9Q5J9;A0A0R4J1P2;P21107	Tropomyosin alpha-3 chain	Tpm3
n. def.	6.41782				TCF4		3	3	3	3	3	3	139.97	0	159640000	3	0	3	0	3	n. def.	8.20314	n. def.	n. def.	Q80TH4;E9Q624;E9QA22;Q3UMJ0;E9QA23;Q8K0R1	Q80TH4;E9Q624;E9QA22;Q3UMJ0		Zfp644
n. def.	5.99921						2	2	2	16.6	16.6	16.6	16.505	0.005456	10980000	1	0	2	0	2	n. def.	7.0406	n. def.	n. def.	F6QZ47;E9Q6A9;Q3UZT7;Q02248;D3YUH4	F6QZ47;E9Q6A9;Q3UZT7;Q02248;D3YUH4	Catenin beta-1	Ctnnb1
n. def.	6.65905	+					1	1	1	20.4	20.4	20.4	5.5263	1	9121700	0	0	1	0	1	n. def.	6.96008	n. def.	n. def.	E9Q6I8;Q6XZL8;H9LAN6	E9Q6I8;Q6XZL8;H9LAN6		Dot1l
5.24541	5.88651						2	2	2	12	12	12	18.946	0	9459900	3	1	2	1	2	6.24541	6.88651	n. def.	n. def.	Q3UZ06;E9Q6R3;O08547;D6RES2;A0A0G2JF08	Q3UZ06;E9Q6R3;O08547;D6RES2;A0A0G2JF08	Vesicle-trafficking protein SEC22b	Sec22b
n. def.	5.68777						1	1	1	11.5	11.5	11.5	14.731	0.0025042	1461800	2	0	1	0	1	n. def.	6.16489	n. def.	n. def.	E9Q6U4;Q3UWL8	E9Q6U4;Q3UWL8		Pfdn4
5.16376	5.82847						3	3	3	7.9	7.9	7.9	67.928	0	25404000	3	1	2	1	2	6.65511	7.31983	n. def.	n. def.	E9Q740;F8VQC1;Q3UZL8;A0PJ97;A0JLN1;Q9CS54;Q3UU23	E9Q740;F8VQC1;Q3UZL8;A0PJ97;A0JLN1	Signal recognition particle subunit SRP72	Srp72
5.24343	6.17429						12	12	12	9.8	9.8	9.8	235.63	0	191930000	20	2	12	2	12	7.30412	8.235	174	1739	E9Q7G0;Q91W16;F6ZQA3;Q3UNM2;Q99KG8;Q3TH77;A0A1B0GT61;A0A1B0GSW3;A0A1B0GT38;A0A1B0GSH2	E9Q7G0;Q91W16;F6ZQA3;Q3UNM2		Numa1
n. def.	3.80597	+					1	1	1	1.3	1.3	1.3	360.76	1	678070	0	0	1	0	1	n. def.	5.83127	175	482	Q8JZM8;E9Q7Q0	Q8JZM8;E9Q7Q0	Mucin-4;Mucin-4 alpha chain;Mucin-4 beta chain	Muc4
n. def.	5.38167	+					1	1	1	2.5	2.5	2.5	71.709	1	8187600	0	0	1	0	1	n. def.	6.91316	n. def.	n. def.	Q3B7X8;E9Q7R9	Q3B7X8;E9Q7R9		Wdr96
n. def.	5.496						1	1	1	0.8	0.8	0.8	292.59	0.0053599	36346000	1	0	1	0	1	n. def.	7.56046	n. def.	n. def.	E9Q876	E9Q876		Abca12
n. def.	5.77952				OLIG2		2	2	2	3.5	3.5	3.5	94.044	0.0016722	24678000	2	0	2	0	2	n. def.	7.39231	n. def.	n. def.	E9Q8X5	E9Q8X5		Zbtb10
n. def.	4.53186	+					1	1	1	0.5	0.5	0.5	185.9	1	3096800	0	0	1	0	1	n. def.	6.49091	425	1019	E9Q9T4;Q8C0T9	E9Q9T4;Q8C0T9	Adenylate cyclase type 10	Adcy10
n. def.	4.62743						1	1	1	1	1	1	284.08	0	5597600	1	0	1	0	1	n. def.	6.748	n. def.	n. def.	O88491;E9QAE4	O88491;E9QAE4	Histone-lysine N-methyltransferase, H3 lysine-36 and H4 lysine-20 specific	Nsd1
n. def.	6.23459						3	3	3	12.7	12.7	12.7	36.366	0	30893000	4	0	3	0	3	n. def.	7.48986	n. def.	n. def.	E9QAG2;Q9D4J7;Q9D4J7-2	E9QAG2;Q9D4J7;Q9D4J7-2	PHD finger protein 6	Phf6
5.59252	5.93375						2	2	2	9.8	9.8	9.8	46.71	0	28746000	3	1	2	1	2	6.95425	7.29548	n. def.	n. def.	Q9WV60;Q5KU03;E9QAQ5;Q3TB31	Q9WV60;Q5KU03;E9QAQ5;Q3TB31	Glycogen synthase kinase-3 beta	Gsk3b
5.72034	6.56992				OLIG2		20	20	15	13.9	13.9	10.2	216.37	0	377350000	29	8	19	5	14	7.66973	8.51932	n. def.	n. def.	E9QAS4;Q6PDQ2;E9QAS5;Q5DTP7;Q99JM0;Q3U582;Q8BM83;E9PYU4;A2A8L1;E9PYL1;Q3UFM8;F6WR45;Q8BL30;Q3ULG0	E9QAS4;Q6PDQ2;E9QAS5;Q5DTP7;Q99JM0	Chromodomain-helicase-DNA-binding protein 4	Chd4
5.35056	6.18845						4	3	3	11.2	8	8	66.269	0	53024000	8	2	4	1	3	6.82768	7.66557	n. def.	n. def.	Q547R0;P35922-3;E9QAT0;P35922-2;Q6AXB7;P35922;P35922-5;P35922-4;P35922-6;P35922-9;P35922-8;D3Z6U8;P35922-7;E9QNF5;E9QAS8;Q8BPN5;Q8BPK8;P35922-11;P35922-10;P35922-12;E9QAS9	Q547R0;P35922-3;E9QAT0;P35922-2;Q6AXB7;P35922;P35922-5;P35922-4;P35922-6;P35922-9;P35922-8;D3Z6U8;P35922-7;E9QNF5;E9QAS8;Q8BPN5;Q8BPK8;P35922-11;P35922-10;P35922-12;E9QAS9	Fragile X mental retardation protein 1 homolog	Fmr1
7.55735	7.99487						12	12	12	50	50	50	24.146	0	1484000000	30	8	12	8	12	8.59875	9.03627	n. def.	n. def.	Q9CZM2;Q5M8Q0;Q3U7D2;E9QAZ2;B8JKK2	Q9CZM2;Q5M8Q0;Q3U7D2;E9QAZ2	60S ribosomal protein L15;Ribosomal protein L15	Rpl15;Gm10020
5.95517	6.45738						9	9	9	15	15	15	101.43	0	169590000	12	5	8	5	8	7.60839	8.11059	n. def.	n. def.	Q68FL6;E9QB02;F6W0G8	Q68FL6;E9QB02	Methionine--tRNA ligase, cytoplasmic	Mars
n. def.	4.19382						2	2	2	1.4	1.4	1.4	184.67	0.00087719	1109300	3	1	1	1	1	n. def.	6.04505	n. def.	n. def.	Q5PSV9;E9QK89	Q5PSV9;E9QK89	Mediator of DNA damage checkpoint protein 1	Mdc1
4.00766	4.47641				OLIG2		2	2	2	1.8	1.8	1.8	291.55	0	5939100	2	1	1	1	1	6.17791	6.64668	n. def.	n. def.	Q80YV3;F7CGG2;E9QLK7;Q3UH32;E9PZA7;E9PWT1;A0A1D5RLL4	Q80YV3;F7CGG2;E9QLK7;Q3UH32;E9PZA7;E9PWT1;A0A1D5RLL4	Transformation/transcription domain-associated protein	Trrap
n. def.	6.06577				OLIG2	+	2	2	2	9.1	9.1	9.1	65.414	0.00087951	36067000	2	0	2	0	2	n. def.	7.55711	n. def.	n. def.	Q3URM6;Q5DTR2;Q8CEC2;P53762-2;E9QLT6;Q3ULM2;Q3U7X2;P53762	Q3URM6;Q5DTR2;Q8CEC2;P53762-2;E9QLT6;Q3ULM2;Q3U7X2;P53762	Aryl hydrocarbon receptor nuclear translocator	Arnt
7.1174	7.51005						9	9	1	44.9	44.9	9.8	27.217	0	636540000	23	8	9	1	1	8.26354	8.65617	36	133	E9QN08;Q80T06;P57776;P57776-3;A0A0R4J1E2;D3YUQ9	E9QN08;Q80T06;P57776;P57776-3;A0A0R4J1E2;D3YUQ9	Elongation factor 1-delta	Eef1d
5.36996	n. def.	+					1	1	1	6.4	6.4	6.4	17.572	1	2578500	0	1	0	1	0	6.41137	n. def.	n. def.	n. def.	Z4YM84;Q5XG73-2;Q5XG73-3;Q5XG73;E9QNH7;Q5CZX6	Z4YM84;Q5XG73-2;Q5XG73-3;Q5XG73;E9QNH7;Q5CZX6	Acyl-CoA-binding domain-containing protein 5	Acbd5
6.24578	n. def.						9	9	9	11.1	11.1	11.1	129.68	0	98621000	10	9	0	9	0	7.99397	n. def.	n. def.	n. def.	Q05920;G5E8R3;Q3UFS6;Q3TCQ3;Q3T9S7;E9QPD7;Q62043;Q8BP54	Q05920;G5E8R3;Q3UFS6;Q3TCQ3;Q3T9S7;E9QPD7;Q62043;Q8BP54	Pyruvate carboxylase, mitochondrial;Pyruvate carboxylase	Pc;Pcx
n. def.	5.82033						4	4	4	5	5	5	150.33	0	49589000	5	0	4	0	4	n. def.	7.69539	n. def.	n. def.	Q6A026;E9QPI5;A0A0J9YV33;Q8VDS0	Q6A026;E9QPI5	Sister chromatid cohesion protein PDS5 homolog A	Pds5a
6.19725	n. def.	+					1	1	1	0.9	0.9	0.9	123.43	1	97646000	0	1	0	1	0	7.98965	n. def.	180	762	O70373;E9QQ93	O70373;E9QQ93	Xin actin-binding repeat-containing protein 1	Xirp1
5.53998	5.57178						1	1	1	4.4	4.4	4.4	51.384	0	12236000	3	1	1	1	1	6.77043	6.80223	n. def.	n. def.	F2WWK6;F2WWK5;Q9Z0R9	F2WWK6;F2WWK5;Q9Z0R9	Fatty acid desaturase 2	Fads2
n. def.	n. def.						1	1	1	2	2	2	46.079	0.0058309	0	1	1	0	1	0	n. def.	n. def.	n. def.	n. def.	F2Z490;Q8C8R9;Q9R1C6	F2Z490;Q8C8R9;Q9R1C6	Diacylglycerol kinase epsilon	Dgke
7.69068	7.70505						3	3	3	20.8	20.8	20.8	16.966	0	498800000	4	2	3	2	3	8.38966	8.40401	n. def.	n. def.	F6QL70;Q5M8M8;P47915;A0A1L1SS27;F6YH22;W4VSN7;A0A1L1STJ3;A0A1L1SUN1	F6QL70;Q5M8M8;P47915;A0A1L1SS27;F6YH22;W4VSN7	60S ribosomal protein L29	Gm17669;Rpl29;Gm5218
n. def.	4.85655						1	1	1	1.8	1.8	1.8	114.15	0	3521600	1	0	1	0	1	n. def.	6.54674	n. def.	n. def.	F6RPJ9;Q9JHR7;Q8CGB9	F6RPJ9;Q9JHR7;Q8CGB9	Insulin-degrading enzyme	Ide
n. def.	n. def.	+					1	1	1	3.7	3.7	3.7	27.419	1	0	1	0	1	0	1	n. def.	n. def.	181	239	F6RR30	F6RR30		Lipo4
5.36568	5.74723						1	1	1	5.5	5.5	5.5	26.045	0.0024834	7908700	2	1	1	1	1	6.36568	6.74723	n. def.	n. def.	Q921F5;F6RXJ8;Q922X9	Q921F5;F6RXJ8;Q922X9	Protein arginine N-methyltransferase 7	Prmt7
5.64858	n. def.	+					1	1	1	5.1	5.1	5.1	21.288	1	3116600	0	1	0	1	0	6.49368	n. def.	182	41	L7N2B0;F6T8D7;J3QN18;J3QM56;K7N6U8	L7N2B0;F6T8D7;J3QN18;J3QM56;K7N6U8		Gm8220;Gm6401;Gm3015;Gm7929;Gm8094
n. def.	6.15918	+					1	1	1	12	12	12	14.216	1	8656400	0	0	1	0	1	n. def.	6.93734	183	71	F6TLW1;Q3URV4;P02468;F8VQJ3	F6TLW1;Q3URV4;P02468;F8VQJ3	Laminin subunit gamma-1	Lamc1
n. def.	5.7565	+					1	1	1	8.2	8.2	8.2	19.429	1	5137300	1	0	1	0	1	n. def.	6.71073	184	89	F6VY64;Q8VHZ7	F6VY64;Q8VHZ7	U3 small nucleolar ribonucleoprotein protein IMP4	Imp4
n. def.	4.59578						1	1	1	4.5	4.5	4.5	49.915	0.0059259	827940	1	0	1	0	1	n. def.	5.918	n. def.	n. def.	Q6P6H8;Q8CHH1;Q6PHU4;F6W623;O08550;F8WJ40	Q6P6H8;Q8CHH1;Q6PHU4;F6W623;O08550;F8WJ40	Histone-lysine N-methyltransferase 2B	Kmt2b;Wbp7
n. def.	5.62496						2	2	2	4.7	4.7	4.7	61.568	0	10541000	2	0	2	0	2	n. def.	7.02288	n. def.	n. def.	Q6ZQ53;F6YJB6;V9GXJ1;Q8R4X3	Q6ZQ53;F6YJB6;V9GXJ1;Q8R4X3	RNA-binding protein 12	Cpne1;Rbm12
n. def.	6.1653						2	2	2	10.6	10.6	10.6	33.278	0.00085397	16095000	2	0	2	0	2	n. def.	7.20669	n. def.	n. def.	H3BLD4;I6L9G0;P59997;F6YRW4	H3BLD4;I6L9G0;P59997;F6YRW4	Lysine-specific demethylase 2A	Kdm2a
6.2766	6.46492						1	1	1	9.6	9.6	9.6	15.542	0.0054687	33652000	2	1	1	1	1	7.12169	7.31001	n. def.	n. def.	F6YSQ2;Q91VL2;Q8BZN7;Q569Z6	F6YSQ2;Q91VL2;Q8BZN7;Q569Z6	Thyroid hormone receptor-associated protein 3	Thrap3
n. def.	n. def.	+					1	1	1	4.3	4.3	4.3	32.945	1	0	1	0	1	0	1	n. def.	n. def.	n. def.	n. def.	F6Z4X6	F6Z4X6		Optc
n. def.	6.21901				OLIG2		4	4	4	7.5	7.5	7.5	102.93	0	84447000	7	0	4	0	4	n. def.	7.92658	n. def.	n. def.	G5E8J8;O88286-2;F6ZBR8;O88286-3;O88286	G5E8J8;O88286-2;F6ZBR8;O88286-3;O88286	Protein Wiz	Wiz
n. def.	6.95975						7	4	4	14	8.9	8.9	78.254	0	309910000	10	0	7	0	4	n. def.	8.49124	n. def.	n. def.	Q80TG4;Q62441;F6ZBY9;Q3UY41;Q62440-3;Q62440-2;Q62440-5;Q6PFG2;Q62440;Q5SQA2;E9Q2Q6;Q5SQA4;Q5SQA3;Q80VE9;Q62440-6	Q80TG4;Q62441;F6ZBY9;Q3UY41;Q62440-3;Q62440-2;Q62440-5;Q6PFG2;Q62440;Q5SQA2;E9Q2Q6;Q5SQA4;Q5SQA3;Q80VE9;Q62440-6	Transducin-like enhancer protein 4;Transducin-like enhancer protein 1	Tle4;Tle1
4.61136	n. def.						2	2	2	1.1	1.1	1.1	266.92	0.0070972	4495300	2	2	0	2	0	6.65276	n. def.	n. def.	n. def.	Q7M739;F6ZDS4;Q8K2T9;F6RX08;Q3UVR0;Q3V1L5	Q7M739;F6ZDS4;Q8K2T9;F6RX08;Q3UVR0;Q3V1L5	Nucleoprotein TPR	Tpr
n. def.	4.13555						1	1	1	5	5	5	24.767	0.0090215	163960	1	0	1	0	1	n. def.	5.21474	n. def.	n. def.	F7A4U8;Q3TYE1;Q9DC28-2;Q3UBT6;Q9DC28;Q9QUI3;Q9JMK2;Q3USK2	F7A4U8;Q3TYE1;Q9DC28-2;Q3UBT6;Q9DC28;Q9QUI3;Q9JMK2;Q3USK2	Casein kinase I isoform delta;Casein kinase I isoform epsilon	Csnk1d;Csnk1e
5.60531	6.11508						1	1	1	7	7	7	17.937	0.0024773	18771000	3	1	1	1	1	6.6467	7.15649	n. def.	n. def.	S4R1E5;Q8K4U7;Q3TI34;O70325-2;Q5XJZ8;Q3TIF2;O70325;Q91XR9;Q76LV0;F7A8H6	S4R1E5;Q8K4U7;Q3TI34;O70325-2;Q5XJZ8;Q3TIF2;O70325;Q91XR9;Q76LV0;F7A8H6	Glutathione peroxidase;Phospholipid hydroperoxide glutathione peroxidase, mitochondrial;Phospholipid hydroperoxide glutathione peroxidase, nuclear	Hnrpll;Gpx4
7.04778	7.1123						6	6	6	63.6	63.6	63.6	14.515	0	168800000	12	4	6	4	6	7.89289	7.95739	n. def.	n. def.	Q6ZWZ6;F7AEH4;P63323;A0A1W2P7A1	Q6ZWZ6;F7AEH4;P63323;A0A1W2P7A1	40S ribosomal protein S12	Rps12
n. def.	7.89347	+					1	1	1	10	10	10	11.662	1	391230000	0	0	1	0	1	n. def.	8.59243	n. def.	n. def.	Q5SXC9;F7ARZ1;Q8VE22;Q3THH3	Q5SXC9;F7ARZ1;Q8VE22;Q3THH3	28S ribosomal protein S23, mitochondrial	Mrps23
n. def.	n. def.						2	2	2	2.8	2.8	2.8	158.69	0.0058267	0	2	0	2	0	2	n. def.	n. def.	n. def.	n. def.	F7AYW2;Q7TPM1;F8WHT3	F7AYW2;Q7TPM1;F8WHT3	Protein PRRC2B	Prrc2b
6.23297	6.62486						7	4	4	15.6	9.8	9.8	59.626	0	159990000	9	3	7	0	4	7.66434	8.05622	n. def.	n. def.	F7B5B5;Q99KG1;Q3UZI0;Q3UKV5;Q8VHM5;Q3UMT8;Q3U8W9;Q9CT37;A2AW41;Q8BL32;G3UXU5;S4R1E9	F7B5B5;Q99KG1;Q3UZI0;Q3UKV5;Q8VHM5;Q3UMT8;Q3U8W9;Q9CT37		Hnrnpr
n. def.	n. def.						1	1	1	3.2	3.2	3.2	35.056	0.0032415	0	1	0	1	0	1	n. def.	n. def.	426	86	Q8VGG0;Q7TR03;F7BL62	Q8VGG0;Q7TR03;F7BL62		Olfr1220
n. def.	5.9185						1	1	1	14.6	14.6	14.6	15.383	0.0047319	5802300	2	0	1	0	1	n. def.	6.7636	n. def.	n. def.	F7CFA5;Q3TSQ7;P26443	F7CFA5;Q3TSQ7;P26443	Glutamate dehydrogenase 1, mitochondrial	Glud1
n. def.	n. def.	+					1	1	1	1.9	1.9	1.9	92.052	1	0	1	1	0	1	0	n. def.	n. def.	193	447	Q2VPA6-3;F7DCU7;Q2VPA6-2;Q2VPA6	Q2VPA6-3;F7DCU7;Q2VPA6-2;Q2VPA6	Helicase POLQ-like	Helq
n. def.	n. def.						1	1	1	2.9	2.9	2.9	35.537	0.0059128	0	1	0	1	0	1	n. def.	n. def.	n. def.	n. def.	F7DF70;Q80WB7;Q7TSH2	F7DF70;Q80WB7;Q7TSH2	Phosphorylase b kinase regulatory subunit beta	Phkb
4.68973	n. def.	+					1	1	1	0.9	0.9	0.9	90.746	1	2202700	0	1	0	1	0	6.34296	n. def.	n. def.	n. def.	Q6A035;P70336;F8VPK5;P70336-2	Q6A035;P70336;F8VPK5;P70336-2	Rho-associated protein kinase 2	Rock2
n. def.	5.67317	+					1	1	1	1.1	1.1	1.1	183.56	1	34394000	1	0	1	0	1	n. def.	7.53648	n. def.	n. def.	Q3UHH9;Q8CIQ7;F8VPQ1	Q3UHH9;Q8CIQ7;F8VPQ1	Dedicator of cytokinesis protein 3	Dock3
4.60109	5.66426						3	3	3	3.6	3.6	3.6	127.99	0	31595000	4	1	3	1	3	6.40043	7.46359	n. def.	n. def.	Q6A4J8-3;Q6A4J8;F8VPX1;Q6A4J8-2;E9PXY8;E0CY04	Q6A4J8-3;Q6A4J8;F8VPX1;Q6A4J8-2;E9PXY8	Ubiquitin carboxyl-terminal hydrolase 7;Ubiquitin carboxyl-terminal hydrolase	Usp7
5.04778	5.07218						2	2	2	2	2	2	206.72	0	19525000	2	1	1	1	1	6.97719	7.0016	n. def.	n. def.	Q8VDD9;F8VQ93	Q8VDD9;F8VQ93	PH-interacting protein	Phip
n. def.	n. def.	+					1	1	1	1	1	1	141.49	1	0	1	0	1	0	1	n. def.	n. def.	198	193	F8VQF9;Q3TLI0	F8VQF9;Q3TLI0	Trafficking protein particle complex subunit 10	Trappc10
n. def.	n. def.						2	2	2	4.3	4.3	4.3	99.544	0.0059568	0	2	1	1	1	1	n. def.	n. def.	n. def.	n. def.	Q9R244-3;Q9R244-4;Q9R244-2;Q9R244;F8VQM8;Q5F0M4	Q9R244-3;Q9R244-4;Q9R244-2;Q9R244;F8VQM8;Q5F0M4	Short transient receptor potential channel 2	Trpc2
n. def.	5.61966						2	2	2	8.9	8.9	8.9	45.508	0	9163900	3	0	2	0	2	n. def.	6.96208	n. def.	n. def.	Q8C214;Q8BRG8-3;F8WGT2;Q8BRG8-2;Q8BRG8	Q8C214;Q8BRG8-3;F8WGT2;Q8BRG8-2;Q8BRG8	Transmembrane protein 209	Tmem209
5.81645	6.46768						14	14	14	16.3	16.3	16.3	138.43	0	251360000	22	7	12	7	12	7.66155	8.31279	n. def.	n. def.	Q8CIE6;Q8BTF0;F8WHL2;Q63ZW9;Q3TAU7;Q99JW9;Q8BTF3;Q8R393;F6XJN3	Q8CIE6;Q8BTF0;F8WHL2;Q63ZW9	Coatomer subunit alpha;Xenin;Proxenin	Copa
n. def.	5.55758						2	2	2	3.2	3.2	3.2	116.89	0	18775000	3	1	2	1	2	n. def.	7.27358	n. def.	n. def.	Q569Z5-2;F8WHR6;Q569Z5	Q569Z5-2;F8WHR6;Q569Z5	Probable ATP-dependent RNA helicase DDX46	Ddx46
n. def.	6.05736						5	5	5	5.4	5.4	5.4	164.42	0	84452000	5	0	5	0	5	n. def.	7.92661	n. def.	n. def.	Q4VA53;Q4VA53-3;F8WHU5;Q4VA53-2	Q4VA53;Q4VA53-3;F8WHU5;Q4VA53-2	Sister chromatid cohesion protein PDS5 homolog B	Pds5b
n. def.	5.42586						3	3	3	6.7	6.7	6.7	59.772	0	7464700	3	0	3	0	3	n. def.	6.87301	n. def.	n. def.	Q3UKD6;F8WI90;P05480;Q3TLX4;D3YZ57;P06240;E9Q696;P39688-2;P39688;Q8CBP1;Q8C762;Q3TJI7;Q04736	Q3UKD6;F8WI90;P05480	Neuronal proto-oncogene tyrosine-protein kinase Src	Src
n. def.	5.04427						1	1	1	1.1	1.1	1.1	114.29	0.005878	4983100	1	0	1	0	1	n. def.	6.6975	n. def.	n. def.	Q3TPD4;Q9JIS8;Q6NXV2;Q3U9N0;Q3U689;Q3TWZ6;Q3TWV2;Q3TLV0;Q3TJM8;Q3TJG5;Q3UDQ8;F8WIJ0	Q3TPD4;Q9JIS8;Q6NXV2;Q3U9N0;Q3U689;Q3TWZ6;Q3TWV2;Q3TLV0;Q3TJM8;Q3TJG5;Q3UDQ8;F8WIJ0	Solute carrier family 12 member 4	Slc12a4
n. def.	5.93613						2	2	2	12.5	12.5	12.5	37.538	0	12949000	2	0	2	0	2	n. def.	7.11224	n. def.	n. def.	F8WIK5;Q9ERS5	F8WIK5;Q9ERS5	Pleckstrin homology domain-containing family A member 2	Plekha2
4.68854	5.78034						3	3	3	9.9	9.9	9.9	53.669	0	18903000	4	1	3	1	3	6.15094	7.24274	n. def.	n. def.	Q8CEX0;Q3V2Z4;Q99JX6;Q3TUI1;F8WIT2;Q3UI56;P14824;Q3UDK4	Q8CEX0;Q3V2Z4;Q99JX6;Q3TUI1;F8WIT2;Q3UI56;P14824;Q3UDK4	Annexin;Annexin A6	Anxa6
5.07857	5.19287						2	2	1	2.7	2.7	1.5	91.56	0.0032129	12133000	1	1	1	0	1	6.72202	6.83633	n. def.	n. def.	G3UZZ3;Q3T9X3;P39054-2;Q3TCR7;Q3TBU6;P39054;G3X9G4;F8WIV5;Q91Z39	G3UZZ3;Q3T9X3;P39054-2;Q3TCR7;Q3TBU6;P39054;G3X9G4;F8WIV5;Q91Z39	Dynamin-2	Dnm2
5.4442	5.67089						1	1	1	10.9	10.9	10.9	14.31	0.0083799	5974400	3	1	1	1	1	6.34729	6.57398	n. def.	n. def.	F8WJ30;O70591	F8WJ30;O70591	Prefoldin subunit 2	Pfdn2
n. def.	6.73267						1	1	1	36.8	36.8	36.8	4.2979	0	21614000	3	1	1	1	1	n. def.	7.33474	n. def.	n. def.	F8WJC2;Q3V4B3;Q9CR26	F8WJC2;Q3V4B3;Q9CR26	Vacuolar protein sorting-associated protein VTA1 homolog	Vta1
n. def.	6.60667						4	4	4	12.4	12.4	12.4	40.538	0	40427000	4	0	4	0	4	n. def.	7.60667	n. def.	n. def.	F8WJK8;Q99L47;Q3U9V1;Q3U8D2;Q3U3N7;E9Q1V0;Q3TGW8	F8WJK8;Q99L47;Q3U9V1;Q3U8D2;Q3U3N7;E9Q1V0;Q3TGW8	Hsc70-interacting protein	St13
n. def.	n. def.	+					1	1	1	3	3	3	39.956	1	0	1	0	1	0	1	n. def.	n. def.	202	52	Q3V2Z8;Q62413;G1K381	Q3V2Z8;Q62413;G1K381	Ephrin type-A receptor 6	Epha6
4.87115	7.40642				OLIG2		37	37	1	40.1	40.1	1.5	140.94	0	1636300000	51	2	37	0	1	6.67733	9.21259	n. def.	n. def.	G3UW90;V9GX74;Q925H1;Q499D6;V9GXA5;Q5XK21;Q80V18;Q8K1J0;V9GXE9;Q8BZ62;H7BU26;H7BU27;V9GX39	G3UW90;V9GX74;Q925H1;Q499D6;V9GXA5;Q5XK21;Q80V18;Q8K1J0;V9GXE9	Zinc finger transcription factor Trps1	Trps1
6.64404	7.17995						5	5	5	22.6	22.6	22.6	27.815	0	214940000	12	4	5	4	5	7.68544	8.22136	n. def.	n. def.	Q9D883;Q14C24;G3UW94;E9Q809;Q8BGJ9-4;F8WH71;E9Q5Y2;E9PUZ3;Q8BGJ9-2;E9Q1I7;E9Q5J3;Q8BGJ9;Q8BGJ9-3;E9PWX6;E9PWM2	Q9D883;Q14C24;G3UW94;E9Q809;Q8BGJ9-4;F8WH71;E9Q5Y2;E9PUZ3;Q8BGJ9-2;E9Q1I7;E9Q5J3;Q8BGJ9;Q8BGJ9-3	Splicing factor U2AF 35 kDa subunit;Splicing factor U2AF 26 kDa subunit	U2af1;U2af1l4
6.62662	n. def.						1	1	1	9.6	9.6	9.6	18.618	0.0032284	33862000	1	1	0	1	0	7.52971	n. def.	398	19	G3UWF2	G3UWF2		Iqcf6
n. def.	8.05046						2	1	1	33.3	17.3	17.3	8.6017	0	336960000	2	0	2	0	1	n. def.	8.52758	n. def.	n. def.	G3UZ60;G3UWI9;G3UWX9;Q9Z172	G3UZ60;G3UWI9;G3UWX9;Q9Z172	Small ubiquitin-related modifier 3	Sumo3
n. def.	5.20333				OLIG2		1	1	1	16	16	16	13.52	0.0059524	958290	1	0	1	0	1	n. def.	5.9815	n. def.	n. def.	G3UXL7;G3UWS3;Q8CCB9;Q8CBZ8;Q543C3;Q04886	G3UXL7;G3UWS3;Q8CCB9;Q8CBZ8;Q543C3;Q04886	Transcription factor SOX-8	Sox8
n. def.	5.79277						1	1	1	25	25	25	7.1085	0	3102700	2	0	1	0	1	n. def.	6.49174	n. def.	n. def.	G3UY43;G3UX07;Q3TYD7;G3UXY2;O88508	G3UY43;G3UX07;Q3TYD7;G3UXY2;O88508	DNA (cytosine-5)-methyltransferase 3A	Dnmt3a
6.01616	7.05683						6	6	6	30.4	30.4	30.4	30.446	0	186540000	7	2	6	2	6	7.19223	8.23292	n. def.	n. def.	G3UX26;Q60930;D3YZT5;D3YUN8	G3UX26;Q60930;D3YZT5	Voltage-dependent anion-selective channel protein 2	Vdac2
4.29301	n. def.						1	1	1	1.2	1.2	1.2	191.12	0.0064655	1767100	1	1	0	1	0	6.24726	n. def.	n. def.	n. def.	Q5DTJ4;G3UX48;Q7TSC1	Q5DTJ4;G3UX48;Q7TSC1	Protein PRRC2A	Prrc2a
n. def.	6.53465						1	1	1	21.9	21.9	21.9	6.5159	0	6849700	1	0	1	0	1	n. def.	6.83567	n. def.	n. def.	G3UX74;Q8CCS6-2;Q8CCS6;G3UY42	G3UX74;Q8CCS6-2;Q8CCS6;G3UY42	Polyadenylate-binding protein 2	Pabpn1
n. def.	6.35603						2	2	2	11.2	11.2	11.2	27.526	0	29509000	2	0	2	0	2	n. def.	7.46995	n. def.	n. def.	Q3UYQ0;Q9D7G0;Q9CS42;Q3UPD5;Q3TI27;G3UXL2;Q9CVZ1;Q8C5R8;Q32M04	Q3UYQ0;Q9D7G0;Q9CS42;Q3UPD5;Q3TI27;G3UXL2;Q9CVZ1;Q8C5R8;Q32M04	Ribose-phosphate pyrophosphokinase;Ribose-phosphate pyrophosphokinase 1;Ribose-phosphate pyrophosphokinase 2	Prps1l3;Prps1;Prps2;Prps1l1
7.17739	7.25341						7	7	7	66.9	66.9	66.9	13.897	0	263740000	16	6	6	6	6	8.08048	8.15652	n. def.	n. def.	G3UXT7;Q8CFQ9;Q564D0;Q3USY4;Q3UK30;P56959;G3UZD2;Q91VQ2;F6QCI0;Q3TLE4;Q8BQ46	G3UXT7;Q8CFQ9;Q564D0;Q3USY4;Q3UK30;P56959	RNA-binding protein FUS	Fus
n. def.	5.77488						2	2	2	3.8	3.8	3.8	61.73	0.0054988	14887000	2	0	2	0	2	n. def.	7.17281	203	516	G3XA79;G3UY19;Q99K43;G3UW86;G3UWQ7	G3XA79;G3UY19;Q99K43;G3UW86;G3UWQ7	Protein regulator of cytokinesis 1	Prc1
n. def.	5.75875						1	1	1	7.9	7.9	7.9	25.777	0	5737900	2	0	1	0	1	n. def.	6.75875	n. def.	n. def.	G3UY39;Q3UIA1;P19426-2;P19426	G3UY39;Q3UIA1;P19426-2;P19426	Negative elongation factor E	Nelfe
n. def.	5.24022						1	1	1	1.3	1.3	1.3	113	0	8867500	2	0	1	0	1	n. def.	6.9478	n. def.	n. def.	G3UZD6;Q9ES00;Q6NWW1;Q80TU3	G3UZD6;Q9ES00;Q6NWW1;Q80TU3	Ubiquitin conjugation factor E4 B	Ube4b
n. def.	5.91587						1	1	1	20.2	20.2	20.2	9.6089	0.005473	4943300	1	0	1	0	1	n. def.	6.69402	n. def.	n. def.	Q91YU9;P99029-2;G3UZJ4;Q3UWS9;Q3U7H9;P99029;Q9D6X2;H3BJQ7	Q91YU9;P99029-2;G3UZJ4;Q3UWS9;Q3U7H9;P99029;Q9D6X2;H3BJQ7	Peroxiredoxin-5, mitochondrial	Prdx5
n. def.	n. def.	+					1	1	1	2	2	2	114.05	1	0	1	1	0	1	0	n. def.	n. def.	n. def.	n. def.	G3UZT8;Q62315-2;Q62315	G3UZT8;Q62315-2;Q62315	Protein Jumonji	Jarid2
n. def.	n. def.	+					1	1	1	2.1	2.1	2.1	100.23	1	0	1	0	1	0	1	n. def.	n. def.	207	497	G3UZV2	G3UZV2		Gm4955
n. def.	5.32887						2	2	2	3	3	3	116.11	0.00084104	10449000	2	0	2	0	2	n. def.	7.01907	n. def.	n. def.	Q80TX4;Q921Y1;G3X8X0;Q9CRI3;Q05BH3	Q80TX4;Q921Y1;G3X8X0;Q9CRI3;Q05BH3		Dhx16
n. def.	5.27823						1	1	1	3.1	3.1	3.1	39.742	0.0064609	3605600	1	0	1	0	1	n. def.	6.55698	n. def.	n. def.	Q9DBR3-3;Q9DBR3-2;Q9DBR3;G3X920	Q9DBR3-3;Q9DBR3-2;Q9DBR3;G3X920	Armadillo repeat-containing protein 8	Armc8
n. def.	5.41838						2	2	2	3.7	3.7	3.7	73.118	0.0054773	7861600	3	0	2	0	2	n. def.	6.89551	n. def.	n. def.	Q3TWF6;G3X934	Q3TWF6;G3X934	WD repeat-containing protein 70	Wdr70
5.21245	5.86246						3	3	3	3.6	3.6	3.6	119.82	0	48149000	4	1	3	1	3	6.94483	7.59486	n. def.	n. def.	Q920B9;G3X956	Q920B9;G3X956	FACT complex subunit SPT16	Supt16h;Supt16
n. def.	5.89426						1	1	1	3	3	3	48.814	0.006006	14110000	1	0	1	0	1	n. def.	7.14953	n. def.	n. def.	Q8R2V9;Q3V222;Q80U83;Q8CGF4;G3X972	Q8R2V9;Q3V222;Q80U83;Q8CGF4;G3X972		Sec24c
n. def.	5.4432						2	2	2	5.4	5.4	5.4	54.6	0.0039746	7491500	2	0	2	0	2	n. def.	6.87457	n. def.	n. def.	Q3ZAR9;Q3ZAS1;Q3U015;P49117;G3X9W4	Q3ZAR9;Q3ZAS1;Q3U015;P49117;G3X9W4	Nuclear receptor subfamily 2 group C member 2	Nr2c2
n. def.	5.77029						2	2	2	6.2	6.2	6.2	68.278	0	14731000	4	0	2	0	2	n. def.	7.16823	n. def.	n. def.	Q8CE00;Q8C4J2;P10076;G3XA08	Q8CE00;Q8C4J2;P10076;G3XA08	Zinc finger protein 26	Zfp26
6.03679	6.31044						3	3	3	14.2	14.2	14.2	38.147	0	46982000	4	2	3	2	3	7.21285	7.48653	n. def.	n. def.	G3XA25;Q8R4V3;Q8CAY6;Q80X81;F2Z459	G3XA25;Q8R4V3;Q8CAY6;Q80X81;F2Z459	Acetyl-CoA acetyltransferase, cytosolic	Acat2;Acat3
n. def.	4.86088						1	1	1	1.2	1.2	1.2	79.434	0	2976200	1	0	1	0	1	n. def.	6.47366	n. def.	n. def.	G5E837	G5E837		Hcfc2
4.97218	6.09875						7	7	7	6.4	6.4	6.4	145.81	0	83642000	8	2	6	2	6	6.76456	7.89113	n. def.	n. def.	Q99NB9;G5E866;A0JLN0;Q3UIB4;Q3US00	Q99NB9;G5E866	Splicing factor 3B subunit 1	Sf3b1
n. def.	6.07617						1	1	1	11	11	11	17.672	0.00088496	5958400	1	0	1	0	1	n. def.	6.77513	n. def.	n. def.	G5E883;Q8BSH5;P57784	G5E883;Q8BSH5;P57784	U2 small nuclear ribonucleoprotein A	Snrpa1
n. def.	n. def.	+					1	1	1	1.9	1.9	1.9	71.901	1	0	1	1	0	1	0	n. def.	n. def.	208	290	Q8CGJ2;Q6PG62;Q8BV52;G5E8B1;Q64512	Q8CGJ2;Q6PG62;Q8BV52;G5E8B1;Q64512	Tyrosine-protein phosphatase non-receptor type 13	Ptpn13
5.60378	5.95345						1	1	1	13.3	13.3	13.3	12.751	0	3899800	2	1	1	1	1	6.08091	6.43057	n. def.	n. def.	Q8BZ07;G5E8T3;Q9D104	Q8BZ07;G5E8T3;Q9D104		Srp19
n. def.	5.64877						1	1	1	2	2	2	56.809	0	9353700	1	0	1	0	1	n. def.	6.97098	n. def.	n. def.	Q8BIC1;Q80XN4;G5E905;Q80T67	Q8BIC1;Q80XN4;G5E905;Q80T67		Zfp871
7.18602	7.52017						20	20	20	43.4	43.4	43.4	66.821	0	1114900000	45	12	16	12	16	8.54775	8.8819	n. def.	n. def.	G5E924;Q8R081;Q3UMT7;G3UY38;Q8BI42;Q9CVU5;G3UY56;G3UYY3	G5E924;Q8R081;Q3UMT7;G3UY38	Heterogeneous nuclear ribonucleoprotein L	Hnrnpl
n. def.	6.47306						2	2	2	22.5	22.5	22.5	21.248	0	20805000	2	0	2	0	2	n. def.	7.31817	n. def.	n. def.	H3BKW0;Q6NVF9;H3BJ30;H3BJW3	H3BKW0;Q6NVF9;H3BJ30;H3BJW3	Cleavage and polyadenylation specificity factor subunit 6	Cpsf6
5.65696	5.03503						3	3	3	5.8	5.8	5.8	65.835	0	16869000	2	2	1	2	1	7.13408	6.51214	n. def.	n. def.	Q60875-2;Q60875-3;Q3TYZ4;Q60875-5;H3BJU7;Q60875-4;H3BJX8;H3BJ45;H3BJ40;H3BKH9;Q60875;H3BJM4;H3BJ48;H3BLJ1;H3BIX8;H3BLF9;H3BJ59;H3BL15	Q60875-2;Q60875-3;Q3TYZ4;Q60875-5;H3BJU7;Q60875-4;H3BJX8;H3BJ45;H3BJ40;H3BKH9;Q60875	Rho guanine nucleotide exchange factor 2	Arhgef2
n. def.	6.587						2	2	2	23.7	23.7	23.7	14.974	0	27046000	3	0	2	0	2	n. def.	7.4321	n. def.	n. def.	H3BJC6;H3BJP2;H3BK43;H3BLJ9;H3BJL6;Q9R0P3;H3BKH6;H3BL99	H3BJC6;H3BJP2;H3BK43;H3BLJ9;H3BJL6;Q9R0P3;H3BKH6;H3BL99	S-formylglutathione hydrolase	Esd
6.29905	6.05915						2	2	2	10.1	10.1	10.1	27.083	0	43916000	4	2	2	2	2	7.44518	7.20529	n. def.	n. def.	H3BJE0;Q544Y8;Q3UC19;Q3TX66;Q3TWT4;Q3TVQ3;P28798;Q3U9K2;Q9D2V3;Q3UD85;Q3UAJ3;Q3U9N4;Q3U8W3;Q3U5Q6;Q3TW77;H3BJ90	H3BJE0;Q544Y8;Q3UC19;Q3TX66;Q3TWT4;Q3TVQ3;P28798;Q3U9K2;Q9D2V3;Q3UD85;Q3UAJ3;Q3U9N4;Q3U8W3;Q3U5Q6;Q3TW77;H3BJ90	Granulins;Acrogranin;Granulin-1;Granulin-2;Granulin-3;Granulin-4;Granulin-5;Granulin-6;Granulin-7	Grn
6.30246	6.80312						4	2	2	18.7	12.1	12.1	30.199	0	83617000	6	2	4	1	2	7.30246	7.80312	n. def.	n. def.	H3BKR2;Q3U1B1;Q3TQ70;P62874;H3BLF7;Q61621	H3BKR2;Q3U1B1;Q3TQ70;P62874;H3BLF7;Q61621	Guanine nucleotide-binding protein G(I)/G(S)/G(T) subunit beta-1	Gnb1
n. def.	n. def.						1	1	1	11.4	11.4	11.4	14.771	0	0	1	0	1	0	1	n. def.	n. def.	n. def.	n. def.	H3BLM2;H3BLR3;Q9Z1F9	H3BLM2;H3BLR3;Q9Z1F9	SUMO-activating enzyme subunit 2	Uba2
4.89242	5.49255						1	1	1	3.3	3.3	3.3	41.023	0	7778300	2	1	1	1	1	6.19346	6.79359	n. def.	n. def.	H7BWY2;Q9JKC8;Q9DBU8	H7BWY2;Q9JKC8;Q9DBU8	AP-3 complex subunit mu-1	Ap3m1
n. def.	5.67825						2	2	2	6.3	6.3	6.3	42.499	0	7627200	2	0	2	0	2	n. def.	6.88237	n. def.	n. def.	H7BWY7;Q9Z1K5;H9KV21	H7BWY7;Q9Z1K5;H9KV21	E3 ubiquitin-protein ligase ARIH1	Arih1
n. def.	5.14495						2	2	2	3.3	3.3	3.3	110.35	0	7539200	2	0	2	0	2	n. def.	6.87733	n. def.	n. def.	Q80TX7;P58281;H7BX01;P58281-2;Q8BK99;E0CXD1	Q80TX7;P58281;H7BX01;P58281-2;Q8BK99;E0CXD1	Dynamin-like 120 kDa protein, mitochondrial;Dynamin-like 120 kDa protein, form S1	Opa1
6.18907	6.59098						2	2	2	11.8	11.8	11.8	17.887	0.005303	38113000	1	1	2	1	2	7.03415	7.43607	n. def.	n. def.	H7BX22;P34022;O08846;Q3U6M5	H7BX22;P34022;O08846;Q3U6M5	Ran-specific GTPase-activating protein	Ranbp1
6.13773	6.3041						2	2	2	12.9	12.9	12.9	27.744	0	44036000	3	1	2	1	2	7.25166	7.41805	n. def.	n. def.	Q6PDM2;H7BX95;F7AI47;Q6PDM2-3;Q6PDM2-2	Q6PDM2;H7BX95;F7AI47;Q6PDM2-3;Q6PDM2-2	Serine/arginine-rich splicing factor 1	Srsf1
6.14076	6.53452						4	4	4	41.3	41.3	41.3	17.997	0	57681000	5	3	3	3	3	7.21995	7.6137	n. def.	n. def.	H7BXC3;P17751	H7BXC3;P17751	Triosephosphate isomerase	Tpi1
n. def.	4.955						1	1	1	2	2	2	50.187	0	2344100	1	0	1	0	1	n. def.	6.36998	n. def.	n. def.	H9KV02;Q9QX47-2;Q9QX47-4;H9KV01;H9KV15;Q9QX47-3;Q9QX47;H9KV00	H9KV02;Q9QX47-2;Q9QX47-4;H9KV01;H9KV15;Q9QX47-3;Q9QX47;H9KV00	Protein SON	Son
n. def.	5.12097	+					1	1	1	0.8	0.8	0.8	183.25	1	10702000	1	0	1	0	1	n. def.	7.02946	n. def.	n. def.	I1E4X4	I1E4X4		Plch1
n. def.	5.04454						1	1	1	2.9	2.9	2.9	49.295	0.0058522	3102500	2	0	1	0	1	n. def.	6.49171	n. def.	n. def.	Q5FW94;Q3UZF0;P20664;J3QN19	Q5FW94;Q3UZF0;P20664;J3QN19	DNA primase;DNA primase small subunit	Prim1
n. def.	n. def.	+					1	1	1	34.3	34.3	34.3	4.1026	1	0	1	0	1	0	1	n. def.	n. def.	n. def.	n. def.	J3QQ03;J3QNC2;J3QNR9;Q9CQ90	J3QQ03;J3QNC2;J3QNR9;Q9CQ90	Uncharacterized protein C9orf85 homolog	1110059E24Rik
7.58846	7.96763						18	2	2	49.6	3.9	3.9	37.086	0	2368500000	71	18	17	2	2	8.84374	9.2229	n. def.	n. def.	Q8BG05-2;Q0VG47;J3QNY1;Q6PFA7;B2RXM2	Q8BG05-2;Q0VG47;J3QNY1;Q6PFA7;B2RXM2	Heterogeneous nuclear ribonucleoprotein A3	Hnrnpa3;Gm9242;Gm6793
8.09318	8.19479				TCF4		1	1	1	0.8	0.8	0.8	263.48	0.0039651	29737000000	4	1	1	1	1	10.1185	10.2201	n. def.	n. def.	Q6PR54-2;J7I1C3;Q6PR54;Q6PR54-3	Q6PR54-2;J7I1C3;Q6PR54;Q6PR54-3	Telomere-associated protein RIF1	Rif1
n. def.	n. def.	+					1	1	1	23.3	23.3	23.3	13.439	1	0	1	1	0	1	0	n. def.	n. def.	n. def.	n. def.	Q8BKA3-2;Q6ZPH0;Q8BKA3;J9QHX6	Q8BKA3-2;Q6ZPH0;Q8BKA3;J9QHX6	Serine/arginine repetitive matrix protein 4	Srrm4
n. def.	5.38204						1	1	1	4.7	4.7	4.7	72.367	0.00087642	7230300	1	0	1	0	1	n. def.	6.85916	n. def.	n. def.	Q9ET54-3;Q9ET54-5;Q9ET54-4;K0BWC3;Q9ET54-6;Q9ET54	Q9ET54-3;Q9ET54-5;Q9ET54-4;K0BWC3;Q9ET54-6;Q9ET54	Palladin	Palld
5.11484	5.78151						6	4	4	4.2	2.9	2.9	227.76	0	76433000	7	2	6	2	4	7.13188	7.79855	n. def.	n. def.	Q6URW6-2;Q6URW6;K3W4R2;Q6URW6-3;A0A140LI60;Q7TQH2;A0A140LHX1	Q6URW6-2;Q6URW6;K3W4R2;Q6URW6-3;A0A140LI60	Myosin-14	Myh14
n. def.	6.73038	+					1	1	1	2.8	2.8	2.8	97.343	1	198870000	0	0	1	0	1	n. def.	8.29857	220	6	K7N6R9	K7N6R9		Vmn2r66
5.67087	n. def.	+					1	1	1	4.1	4.1	4.1	36.491	1	8436100	1	1	0	1	0	6.92614	n. def.	221	326	Q80VR4;O55087-2;O55087;K7N7F1	Q80VR4;O55087-2;O55087;K7N7F1	Myocyte-specific enhancer factor 2B	Mef2b;2310045N01Rik
n. def.	7.15927						2	2	2	29	29	29	11.409	0	72152000	2	0	2	0	2	n. def.	7.85825	n. def.	n. def.	Q8C4N8;Q9D859;Q8BPG5;P63001;K7Q7T7;Q3TLP8	Q8C4N8;Q9D859;Q8BPG5;P63001;K7Q7T7;Q3TLP8	Ras-related C3 botulinum toxin substrate 1	Rac1
n. def.	n. def.	+					1	1	1	15.8	15.8	15.8	12.781	1	0	1	0	1	0	1	n. def.	n. def.	n. def.	n. def.	K7TRN5	K7TRN5
n. def.	n. def.	+					1	1	1	5.9	5.9	5.9	34.401	1	0	1	0	1	0	1	n. def.	n. def.	224	222	L7N275	L7N275		Vmn1r169
6.12008	6.42127						10	10	8	24.3	24.3	20.3	62.277	0	122650000	14	5	9	4	7	7.61144	7.91264	n. def.	n. def.	O08553	O08553	Dihydropyrimidinase-related protein 2	Dpysl2
4.93438	5.28421						3	3	3	6.9	6.9	6.9	72.3	0	8351400	4	1	3	1	3	6.4115	6.76133	n. def.	n. def.	O08582	O08582	GTP-binding protein 1	Gtpbp1
5.60278	6.57078						6	6	6	40.4	40.4	40.4	26.94	0	53594000	7	3	4	3	4	6.71671	7.68472	n. def.	n. def.	O08583;O08583-2;Q9JJW6-2;Q9JJW6;Q4KL64;G3X9I4;D9J342	O08583;O08583-2;Q9JJW6-2;Q9JJW6;Q4KL64;G3X9I4;D9J342	THO complex subunit 4;Aly/REF export factor 2	Alyref;Alyref2;Refbp2
n. def.	5.26503						1	1	1	1.7	1.7	1.7	67.568	0	5706700	1	0	1	0	1	n. def.	6.75639	n. def.	n. def.	O08599;O08599-2	O08599;O08599-2	Syntaxin-binding protein 1	Stxbp1
n. def.	5.75298						2	2	2	12.9	12.9	12.9	11.628	0.0024712	2831100	2	0	2	0	2	n. def.	6.45196	n. def.	n. def.	Q3TMZ6;Q3TMN1;Q58E65;O08663;Q3UI33;M0QWX0	Q3TMZ6;Q3TMN1;Q58E65;O08663;Q3UI33;M0QWX0	Methionine aminopeptidase;Methionine aminopeptidase 2	Metap2
5.8645	n. def.						1	1	1	2.6	2.6	2.6	57.68	0.0059303	19763000	0	1	0	1	0	7.29585	n. def.	n. def.	n. def.	O08715-2;O08715-5;O08715-3;O08715-6;O08715;O08715-4	O08715-2;O08715-5;O08715-3;O08715-6;O08715;O08715-4	A-kinase anchor protein 1, mitochondrial	Akap1
n. def.	5.26373						1	1	1	3.3	3.3	3.3	54.272	0	3854300	3	0	1	0	1	n. def.	6.58595	n. def.	n. def.	O08749;Q3TIE8	O08749;Q3TIE8	Dihydrolipoyl dehydrogenase, mitochondrial	Dld
n. def.	5.7893						2	2	2	3.3	3.3	3.3	87.699	0.0032468	20930000	1	0	2	0	2	n. def.	7.32077	n. def.	n. def.	O08759-3;O08759-2;O08759;Q5DTH1	O08759-3;O08759-2;O08759;Q5DTH1	Ubiquitin-protein ligase E3A	Ube3a
n. def.	n. def.	+					1	1	1	1.5	1.5	1.5	67.146	1	0	1	0	1	0	1	n. def.	n. def.	226	570	O08856	O08856	RNA polymerase II elongation factor ELL	Ell
5.61709	6.22961						2	2	2	11.7	11.7	11.7	26.372	0	27440000	6	2	2	2	2	6.73103	7.34355	n. def.	n. def.	Q6RI64;O09061	Q6RI64;O09061	Proteasome subunit beta type;Proteasome subunit beta type-1	Psmb1
7.58225	8.1024						4	4	4	20.6	20.6	20.6	18.579	0	988850000	11	4	4	4	4	8.3604	8.88056	n. def.	n. def.	Q9CQM8;Q4VA28;O09167	Q9CQM8;Q4VA28;O09167	60S ribosomal protein L21	Rpl21
5.99869	6.52961						6	6	6	29.8	29.8	29.8	33.296	0	96413000	9	3	5	3	5	7.34112	7.87203	n. def.	n. def.	Q3V235;O35129;Q3V2V2;F6QPR1;F6Q8V7	Q3V235;O35129;Q3V2V2;F6QPR1	Prohibitin-2	Phb2
4.87129	5.31427						1	1	1	8.2	8.2	8.2	26.974	0	4208200	2	1	1	1	1	6.04739	6.49037	n. def.	n. def.	Q542P8;O35130	Q542P8;O35130	Ribosomal RNA small subunit methyltransferase NEP1	Emg1
n. def.	5.94204						2	2	2	7.1	7.1	7.1	45.017	0	21002000	2	0	2	0	2	n. def.	7.32226	n. def.	n. def.	Q3URN8;Q3UGU6;Q3US33;O35218	Q3URN8;Q3UGU6;Q3US33;O35218	Cleavage and polyadenylation specificity factor subunit 2	Cpsf2
6.1498	6.7644						11	11	11	17	17	17	91.006	0	281770000	20	6	10	6	10	7.74086	8.35547	n. def.	n. def.	Q3UKJ6;Q3TFE5;O35286;A0A0G2JG10;Q3UDX4;Q497W9;A0A0G2JGQ5;Q3THD5	Q3UKJ6;Q3TFE5;O35286;A0A0G2JG10;Q3UDX4;Q497W9	Putative pre-mRNA-splicing factor ATP-dependent RNA helicase DHX15	Dhx15
6.00165	6.33846						3	3	3	12.3	12.3	12.3	33.901	0	28655000	3	1	2	1	2	6.9559	7.2927	n. def.	n. def.	O35295	O35295	Transcriptional activator protein Pur-beta	Purb
n. def.	7.15415						5	5	4	16.6	16.6	16.6	28.537	0	128350000	6	0	5	0	4	n. def.	8.1084	n. def.	n. def.	O35381;D3YYE1;D3Z7M9;F6UFG6;Q64G17	O35381;D3YYE1;D3Z7M9	Acidic leucine-rich nuclear phosphoprotein 32 family member A	Anp32a
n. def.	n. def.	+					1	1	1	6.6	6.6	6.6	33.758	1	0	1	1	0	1	0	n. def.	n. def.	n. def.	n. def.	Q921D0;O35640	Q921D0;O35640	Annexin;Annexin A8	Anxa8
5.07405	5.68627	+					3	1	1	3.8	1.2	1.2	101.19	1	27792000	4	1	2	1	0	6.73679	7.34902	229	244	Q5SVG5;Q5SVG4;Q3U1K9;Q3TVN4;O35643;Q8CC13;H3BJ06;Q6NXY3	Q5SVG5;Q5SVG4;Q3U1K9;Q3TVN4;O35643;Q8CC13	AP-1 complex subunit beta-1	Ap1b1
5.5341	5.75673						1	1	1	4.5	4.5	4.5	38.358	0.0053272	19177000	2	1	1	1	1	6.85633	7.07893	n. def.	n. def.	O35685	O35685	Nuclear migration protein nudC	Nudc
7.19019	7.62764						11	11	6	35.4	35.4	19.2	49.199	0	1042600000	29	8	10	3	5	8.44548	8.88291	n. def.	n. def.	Q811L7;O35737;Q8C2Q7;Q3TNG9	Q811L7;O35737;Q8C2Q7	Heterogeneous nuclear ribonucleoprotein H;Heterogeneous nuclear ribonucleoprotein H, N-terminally processed	Hnrnph1
5.91981	6.45232						4	4	4	16.1	16.1	16.1	48.985	0	80628000	5	2	3	2	3	7.26224	7.79475	n. def.	n. def.	Q3UG68;Q3UC51;O54734	Q3UG68;Q3UC51;O54734	Dolichyl-diphosphooligosaccharide--protein glycosyltransferase 48 kDa subunit	Ddost
n. def.	6.05744				OLIG2		2	2	2	12.4	12.4	12.4	46.638	0	22827000	2	0	2	0	2	n. def.	7.35845	n. def.	n. def.	O54941	O54941	SWI/SNF-related matrix-associated actin-dependent regulator of chromatin subfamily E member 1	Smarce1
6.02407	6.63152						6	6	6	25	25	25	38.822	0	80066000	9	3	6	3	6	7.20014	7.80762	n. def.	n. def.	O54984;A0A1B0GRE1;Q8VEI6;Q8C1Q1	O54984;A0A1B0GRE1;Q8VEI6	ATPase Asna1	Asna1
n. def.	5.62526						1	1	1	4	4	4	29.942	0	5907300	0	0	1	0	1	n. def.	6.77139	n. def.	n. def.	Q80ZJ2;Q9D066;Q924B0;Q3U5R8;Q3TME6;O55023	Q80ZJ2;Q9D066;Q924B0;Q3U5R8;Q3TME6;O55023	Inositol monophosphatase 1	Impa1
5.75959	6.51876						14	14	14	24.6	24.6	24.6	102.45	0	186090000	21	6	13	6	13	7.44083	8.2	n. def.	n. def.	O55029	O55029	Coatomer subunit beta	Copb2
6.69464	7.29057						5	5	5	32.7	32.7	32.7	12.573	0	146850000	8	3	4	3	4	7.47279	8.06874	n. def.	n. def.	Q9DC85;Q8BQV7;Q6ZWX1;O55142	Q9DC85;Q8BQV7;Q6ZWX1;O55142	60S ribosomal protein L35a	Rpl35a
6.2062	6.82341						18	18	18	22.7	22.7	22.7	114.86	0	388540000	30	6	17	6	17	7.8783	8.4955	n. def.	n. def.	O55143;Q5DTI2;O55143-2;O54994;Q8R429;Q8C213;B1ATS4;Q8R0X5;Q64518-2;Q3U1K2;B1ATS5;Q64518-3;E9Q559;Q64518;Q3V1C4	O55143;Q5DTI2;O55143-2;O54994	Sarcoplasmic/endoplasmic reticulum calcium ATPase 2	Atp2a2
n. def.	5.95084						2	2	2	4	4	4	51.373	0.0032	21432000	1	0	2	0	2	n. def.	7.33106	n. def.	n. def.	O55222	O55222	Integrin-linked protein kinase	Ilk
5.38489	6.01355						3	3	3	12.9	12.9	12.9	28.532	0	20388000	3	2	2	2	2	6.58901	7.21764	n. def.	n. def.	O55234;Q8BTY5	O55234;Q8BTY5	Proteasome subunit beta type-5	Psmb5
n. def.	5.49248						1	1	1	3.8	3.8	3.8	39.384	0.00084746	5594500	1	0	1	0	1	n. def.	6.74776	n. def.	n. def.	O70126	O70126	Aurora kinase B	Aurkb
6.19221	6.56847						9	9	9	27.6	27.6	27.6	63.988	0	131480000	12	5	9	5	9	7.59014	7.96642	n. def.	n. def.	O70194	O70194	Eukaryotic translation initiation factor 3 subunit D	Eif3d
n. def.	5.64866	+					1	1	1	4.1	4.1	4.1	24.669	1	4453100	0	0	1	0	1	n. def.	6.64866	230	165	O70302	O70302	Cell death activator CIDE-A	Cidea
n. def.	5.72019						3	3	3	10.1	10.1	10.1	56.888	0	11026000	4	1	3	1	3	n. def.	7.04242	n. def.	n. def.	Q3UJC3;O70310	Q3UJC3;O70310	Glycylpeptide N-tetradecanoyltransferase 1	Nmt1
n. def.	n. def.	+					1	1	1	3.2	3.2	3.2	52.224	1	0	1	0	1	0	1	n. def.	n. def.	231	450	Q542U3;Q3UEU9;O70422	Q542U3;Q3UEU9;O70422	General transcription factor IIH subunit 4	Gtf2h4
6.13216	6.48209						3	3	3	15.7	15.7	15.7	28.49	0	57074000	4	2	2	2	2	7.24613	7.59604	n. def.	n. def.	Q9DCD8;Q58EV4;O70435;E0CZ34;F8WH02;E0CYL6	Q9DCD8;Q58EV4;O70435;E0CZ34;F8WH02;E0CYL6	Proteasome subunit alpha type;Proteasome subunit alpha type-3	Psma3
n. def.	5.27372						1	1	1	1.6	1.6	1.6	98.201	0.00088106	9015100	1	0	1	0	1	n. def.	6.95497	n. def.	n. def.	Q3TKQ2;Q3V1R9;Q497M7;Q2M4I1;O70481	Q3TKQ2;Q3V1R9;Q497M7;Q2M4I1;O70481	E3 ubiquitin-protein ligase UBR1	Ubr1
6.76313	7.15439						9	9	9	29.2	29.2	29.2	34.741	0	321050000	19	6	9	6	9	7.96725	8.35852	n. def.	n. def.	Q0VGQ1;O70503;O70503-2;Q9CSR6;Q8BPF1	Q0VGQ1;O70503;O70503-2	Estradiol 17-beta-dehydrogenase 12	Hsd17b12
8.25547	8.27648						9	9	9	43	43	43	16.273	0	1476400000	31	8	8	8	8	8.85753	8.87854	n. def.	n. def.	P62264;O70569;Q3UJS5;D3YVF4;D3Z7I1	P62264;O70569;Q3UJS5;D3YVF4;D3Z7I1	40S ribosomal protein S14	Rps14
5.86073	6.81182						3	3	3	15.9	15.9	15.9	32.921	0	93721000	5	1	3	1	3	6.97467	7.92576	n. def.	n. def.	O88271	O88271	Craniofacial development protein 1	Cfdp1
5.2492	6.08906						2	2	2	6.2	6.2	6.2	63.42	0	40747000	3	1	2	1	2	6.7116	7.55145	n. def.	n. def.	Q3TE06;Q9DBM8;Q3TNK2;Q3TJY2;O88342;Q3U136;Q80ZI9;A0A0J9YU05;Q9DC08	Q3TE06;Q9DBM8;Q3TNK2;Q3TJY2;O88342;Q3U136;Q80ZI9;A0A0J9YU05;Q9DC08	WD repeat-containing protein 1	Wdr1
n. def.	5.23998	+					1	1	1	2.1	2.1	2.1	91.989	1	7472000	0	0	1	0	1	n. def.	6.87344	232	673	Q3TBC5;Q0VEI6;O88398	Q3TBC5;Q0VEI6;O88398	Advillin	Avil
7.52156	7.67151						16	16	16	48.4	48.4	48.4	37.402	0	1603400000	54	14	14	14	14	8.82259	8.97254	n. def.	n. def.	O88569;O88569-2;B7ZP22;O88569-3;A0A0N4SUM2	O88569;O88569-2;B7ZP22;O88569-3;A0A0N4SUM2	Heterogeneous nuclear ribonucleoproteins A2/B1	Hnrnpa2b1
n. def.	n. def.	+					1	1	1	1.8	1.8	1.8	102.43	1	0	1	1	0	1	0	n. def.	n. def.	n. def.	n. def.	O88704	O88704	Potassium/sodium hyperpolarization-activated cyclic nucleotide-gated channel 1	Hcn1
n. def.	4.28112	+					1	1	1	3.7	3.7	3.7	27.605	1	171930	0	0	1	0	1	n. def.	5.23535	235	198	Q9CRY1;Q3TPF1;Q3ULB0;Q5DTS4;O88720;S4R1W5	Q9CRY1;Q3TPF1;Q3ULB0;Q5DTS4;O88720;S4R1W5		Rbm6
n. def.	5.64667						2	2	2	11.2	11.2	11.2	29.473	0	6649000	2	0	2	0	2	n. def.	6.82276	n. def.	n. def.	O88796;Q3TF81;Q6P6M0	O88796;Q3TF81;Q6P6M0	Ribonuclease P protein subunit p30	Rpp30
5.33419	n. def.	+					1	1	1	8.9	8.9	8.9	23.636	1	2374500	0	1	0	1	0	6.37557	n. def.	n. def.	n. def.	Q7TMG6;Q99L19;Q61554;O88840	Q7TMG6;Q99L19;Q61554;O88840	Fibrillin-1	Fbn1
5.14959	6.29493						5	5	5	12.8	12.8	12.8	46.674	0	54943000	6	1	5	1	5	6.56457	7.7099	n. def.	n. def.	Q5HZJ8;Q3TJ51;O88844;Q8C338;Q0QER9;A0A087WPT4;A0A087WRS9;D3YVY3;A0A087WRM4	Q5HZJ8;Q3TJ51;O88844;Q8C338;Q0QER9;A0A087WPT4;A0A087WRS9	Isocitrate dehydrogenase [NADP];Isocitrate dehydrogenase [NADP] cytoplasmic	Idh1
5.80562	6.41076						3	3	3	28.8	28.8	28.8	16.604	0	25712000	5	1	3	1	3	6.70872	7.31385	n. def.	n. def.	Q545K5;O89086;Q8BG13;S4R2M6;Q5RJV3	Q545K5;O89086;Q8BG13	Putative RNA-binding protein 3	Rbm3
n. def.	5.30715						1	1	1	5	5	5	24.544	0.0053111	2636900	1	0	1	0	1	n. def.	6.42109	n. def.	n. def.	Q99KF5;P00493	Q99KF5;P00493	Hypoxanthine-guanine phosphoribosyltransferase	Hprt;Hprt1
9.98393	9.99164						7	1	1	46.9	21.2	21.2	12.273	0	97231000000	51	7	6	1	1	10.6829	10.6906	n. def.	n. def.	P01631;Q5F2I0	P01631;Q5F2I0	Ig kappa chain V-II region 26-10	IgG1 anti-TS1 VL
6.44506	6.03266						2	2	2	8.2	8.2	8.2	36.389	0	34781000	3	2	1	2	1	7.39929	6.9869	n. def.	n. def.	P01863;P01865;Q6PIP8;Q6PF95;Q6PJB2;Q569W9;Q505N9;Q66K04;Q6PJA7;Q5R3X3;Q5R3X4;P01864;A0A0A6YY53;F6TQW2;A0A0E4B366;Q9D8L4;Q58E56	P01863;P01865;Q6PIP8;Q6PF95;Q6PJB2;Q569W9;Q505N9;Q66K04;Q6PJA7;Q5R3X3;Q5R3X4;P01864;A0A0A6YY53;F6TQW2;A0A0E4B366;Q9D8L4;Q58E56	Ig gamma-2A chain C region, A allele;Ig gamma-2A chain C region, membrane-bound form;Ig gamma-2A chain C region secreted form	Ighg;Igh-1a;Igh;Ighg2c;Ighg2a
10.6961	10.5713						31	31	2	66.6	66.6	11.6	36.587	0	869390000000	547	29	27	1	1	11.6961	11.5713	n. def.	n. def.	P01867-2;P01867;Q8R3H6;A0A075B5P3;A0A0F7R1P3;A0A0F7QZE4;Q569X1;Q5R3X7;A0A0A6YVP0;Q5R3Y0	P01867-2;P01867;Q8R3H6;A0A075B5P3;A0A0F7R1P3;A0A0F7QZE4;Q569X1	Ig gamma-2B chain C region	Igh-3;Ighg
n. def.	n. def.						1	1	1	10.1	10.1	10.1	14.802	0.0024671	0	1	0	1	0	1	n. def.	n. def.	n. def.	n. def.	P02815	P02815	16.5 kDa submandibular gland glycoprotein	Spt1
n. def.	6.05793						2	2	2	6.6	6.6	6.6	62.747	0	30853000	2	0	2	0	2	n. def.	7.4893	n. def.	n. def.	P03975;Q7TQ39;Q61213	P03975;Q7TQ39;Q61213	IgE-binding protein	Iap;ENSMUSG00000074697;ENSMUSG00000079974
n. def.	n. def.	+					1	1	1	2.9	2.9	2.9	51.551	1	0	1	1	0	1	0	n. def.	n. def.	240	319	Q3V1A2;Q05A24;P04756	Q3V1A2;Q05A24;P04756	Acetylcholine receptor subunit alpha	Chrna1
5.58301	6.12212						3	2	2	14.3	6.6	6.6	39.394	0	39273000	5	2	3	1	2	6.94473	7.48384	n. def.	n. def.	P05063	P05063	Fructose-bisphosphate aldolase C	Aldoc
n. def.	6.08001						3	3	3	11.4	11.4	11.4	47.411	0	31259000	3	0	3	0	3	n. def.	7.49498	n. def.	n. def.	P05202	P05202	Aspartate aminotransferase, mitochondrial	Got2
7.86589	8.47959	+					12	1	1	38.8	3.1	3.1	50.151	1	7877900000	51	10	12	1	1	9.18811	9.8018	n. def.	n. def.	P05213;Q99KA2;P68368;A0A0A0MQA5;O89052;Q3UX10;A0A087WRB4;A0A087WQS4	P05213;Q99KA2;P68368;A0A0A0MQA5	Tubulin alpha-1B chain;Tubulin alpha-4A chain	Tuba1b;Tuba4a
n. def.	5.48923						2	2	2	4.5	4.5	4.5	61.48	0	9254300	2	0	2	0	2	n. def.	6.96634	n. def.	n. def.	Q3TQP6;Q99LF5;Q921S3;P06801;Q61829	Q3TQP6;Q99LF5;Q921S3;P06801;Q61829	Malic enzyme;NADP-dependent malic enzyme	Me1
4.98939	4.36103						2	2	2	3.2	3.2	3.2	90.15	0.0008658	5183600	3	2	1	2	1	6.62286	5.9945	n. def.	n. def.	Q6NZB3;P07742;Q05DU8	Q6NZB3;P07742;Q05DU8	Ribonucleoside-diphosphate reductase;Ribonucleoside-diphosphate reductase large subunit	Rrm1
n. def.	5.16726						1	1	1	4.3	4.3	4.3	39.816	0.0008547	2498600	1	0	1	0	1	n. def.	6.3977	n. def.	n. def.	P08043-2;P08043;Q07231	P08043-2;P08043;Q07231	Zinc finger protein 2;Zinc finger and SCAN domain-containing protein 21	Zfp2;Zscan21
5.20118	6.10609						3	2	2	4.4	2.6	2.6	92.489	0	55988000	6	1	3	0	2	6.79224	7.69714	n. def.	n. def.	Q91V38;Q3UBU0;Q3UAD6;P08113;F7C312;Q3TUD6;Q8CCY5	Q91V38;Q3UBU0;Q3UAD6;P08113;F7C312;Q3TUD6;Q8CCY5	Endoplasmin	Hsp90b1
5.84077	6.16274						5	5	5	20.4	20.4	20.4	35.611	0	45101000	9	4	4	4	4	7.16298	7.48497	n. def.	n. def.	P08249;A0A0G2JF23;A0A0G2JGY4	P08249;A0A0G2JF23	Malate dehydrogenase, mitochondrial	Mdh2
n. def.	n. def.	+					1	1	1	3.3	3.3	3.3	57.825	1	0	1	0	1	0	1	n. def.	n. def.	n. def.	n. def.	Q05DD2;P08551	Q05DD2;P08551	Neurofilament light polypeptide	Nefl
6.10435	6.58584						3	3	3	10.7	10.7	10.7	40.489	0	87125000	5	2	3	2	3	7.33482	7.81629	n. def.	n. def.	P08752;A0A0A6YWA9;Q9DC51;Q543S2;Q3TJH1;P18872-2;P18872;B2RSH2;Q9JJ21;A2A610;A2AE31;Q8C040;Q9WUC0;D3Z2M7;Q8BHK8;A2AE32;Q9D7B3;P20612;Q3V3I2;P50149;B2RVZ3;A2AE33;Z4YKV1;P63094-2;Q8CGK7;Q3TY78;P63094;Q66L47;Q6R0H7-4;Q6R0H7	P08752;A0A0A6YWA9;Q9DC51;Q543S2;Q3TJH1;P18872-2;P18872;B2RSH2	Guanine nucleotide-binding protein G(i) subunit alpha-2;Guanine nucleotide-binding protein G(k) subunit alpha;Guanine nucleotide-binding protein G(o) subunit alpha;Guanine nucleotide-binding protein G(i) subunit alpha-1	Gnai2;Gnai3;Gnao1;Gnai1
n. def.	n. def.	+					1	1	1	6.4	6.4	6.4	29.643	1	0	1	0	1	0	1	n. def.	n. def.	n. def.	n. def.	Q3UU70;Q9R201;Q549Q4;P08920	Q3UU70;Q9R201;Q549Q4;P08920	T-cell surface antigen CD2	Cd2
5.44948	n. def.				OLIG2		1	1	1	8	8	8	28.321	0	2815000	1	1	0	1	0	6.44948	n. def.	n. def.	n. def.	Q3UNA0;P09021	Q3UNA0;P09021	Homeobox protein Hox-A5	Hoxa5
6.88279	7.29962						19	19	19	35.1	35.1	35.1	76.864	0	1020100000	33	11	16	11	16	8.45099	8.86782	n. def.	n. def.	Q8CD23;Q3TL52;Q3TGR3;P09405;Q8CE30;Q3TT41;Q9CT46	Q8CD23;Q3TL52;Q3TGR3;P09405;Q8CE30;Q3TT41	Nucleolin	Ncl
6.92106	7.4935						17	17	17	53.7	53.7	53.7	44.55	0	1026800000	44	12	17	12	17	8.33604	8.90847	n. def.	n. def.	P09411;S4R2M7;P09041;B0LAA9	P09411;S4R2M7	Phosphoglycerate kinase 1	Pgk1
7.42925	7.5627						6	6	6	8.6	8.6	8.6	58.265	0	1711900000	16	6	5	6	5	8.86062	8.99406	n. def.	n. def.	Q3UZ80;P09838-2;P09838	Q3UZ80;P09838-2;P09838	DNA nucleotidylexotransferase	Dntt
5.54982	6.88388						3	3	3	30.9	30.9	30.9	16.837	0	72077000	6	1	3	1	3	6.50406	7.83812	n. def.	n. def.	P0DP28;P0DP27;P0DP26;Q3UKW2;Q9D6P8	P0DP28;P0DP27;P0DP26;Q3UKW2		Calm1
7.96711	8.41833						15	15	1	41.6	41.6	5.2	50.113	0	7449300000	66	13	14	1	1	9.28932	9.74056	n. def.	n. def.	Q58E64;Q3UA81;P10126;Q3TII3;D3YZ68;D3Z3I8;Q4FZE5	Q58E64;Q3UA81;P10126;Q3TII3;D3YZ68;D3Z3I8	Elongation factor 1-alpha;Elongation factor 1-alpha 1	Eef1a1
n. def.	6.98756						3	3	3	34.3	34.3	34.3	11.675	0	68024000	3	0	3	0	3	n. def.	7.83266	n. def.	n. def.	P10639	P10639	Thioredoxin	Txn
8.32006	7.16355						10	10	8	39.7	39.7	33.3	34.106	0	4247000000	16	4	8	3	6	9.59881	8.44229	n. def.	n. def.	P11440;Q99JW7;Q8R4A4;D3Z2T9	P11440;Q99JW7;Q8R4A4;D3Z2T9	Cyclin-dependent kinase 1	Cdk1
7.45664	7.79587						30	30	21	43.6	43.6	29.1	83.28	0	3006900000	87	25	27	21	19	8.97516	9.31439	n. def.	n. def.	Q71LX8;P11499;Q80YC2;Q811H6;E9Q3D6;E9Q0C3;E9PX27;B7ZC50;D3Z1R1;A2A6A2;B7ZC49;Q8C2R2	Q71LX8;P11499	Heat shock protein HSP 90-beta	Hsp90ab1
6.75129	7.32174						21	21	21	47.5	47.5	47.5	60.448	0	825140000	34	11	17	11	17	8.24267	8.81311	n. def.	n. def.	P11983;P11983-2;W0TYI4;F2Z483;Q9QZ34;Q6LBL9;Q62289;Q9QZ36;Q9QZ35;Q62290;Q9QZ33;Q62291	P11983;P11983-2	T-complex protein 1 subunit alpha	Tcp1
4.43957	n. def.	+					1	1	1	4.2	4.2	4.2	30.021	1	357690	0	1	0	1	0	5.55351	n. def.	247	242	Q8CEF3;Q8C5H2;P12658	Q8CEF3;Q8C5H2;P12658	Calbindin	Calb1
7.65657	7.97972						13	13	13	40.2	40.2	40.2	30.024	0	1548600000	28	12	11	12	11	8.69796	9.02111	n. def.	n. def.	Q6P1A9;Q5EBG5;Q58ET1;P12970;Q80UT7;A0A140T8L1;A0A140T8L3;Q8CDE3;V9GX35	Q6P1A9;Q5EBG5;Q58ET1;P12970;Q80UT7;A0A140T8L1;A0A140T8L3	60S ribosomal protein L7a	Rpl7a
5.31216	5.97735						3	3	3	7.6	7.6	7.6	39.224	0	11544000	5	2	3	2	3	6.31216	6.97735	n. def.	n. def.	Q8BNZ5;Q6T707;Q547C4;P13516;P13011;Q99PL7;Q3UXG5	Q8BNZ5;Q6T707;Q547C4;P13516;P13011;Q99PL7	Acyl-CoA desaturase 1;Acyl-CoA desaturase 2	Scd3;Scd4;Scd1;Scd2
n. def.	5.42612	+					1	1	1	2.9	2.9	2.9	62.845	1	7469300	1	0	1	0	1	n. def.	6.87328	n. def.	n. def.	Q3V0V3;Q3UJG1;Q3URY9;P13405	Q3V0V3;Q3UJG1;Q3URY9;P13405	Retinoblastoma-associated protein	Rb1
5.40598	6.48827						13	13	13	10.8	10.8	10.8	183.31	0	289940000	20	4	13	4	13	7.34549	8.42779	n. def.	n. def.	Q3UHZ3;P13864;Q7TSJ0;J3QNW0;P13864-2;Q3UPE8;Q0VDW2	Q3UHZ3;P13864;Q7TSJ0;J3QNW0;P13864-2	Cytosine-specific methyltransferase;DNA (cytosine-5)-methyltransferase 1	Dnmt1
7.75384	8.13236						7	7	7	35.8	35.8	35.8	16.605	0	1346500000	19	5	7	5	7	8.59893	8.97745	n. def.	n. def.	P14115	P14115	60S ribosomal protein L27a	Rpl27a
7.94977	8.05258						18	18	18	47	47	47	31.419	0	2625300000	34	15	13	15	13	9.06371	9.16652	n. def.	n. def.	Q5M9N8;Q3UBI6;P14148;Q3TK73;F6XI62	Q5M9N8;Q3UBI6;P14148;Q3TK73;F6XI62	60S ribosomal protein L7	Rpl7
5.96614	5.95775						3	3	3	15.6	15.6	15.6	36.511	0	25652000	5	3	2	3	2	7.11227	7.10387	n. def.	n. def.	P14152;B1ATQ3	P14152	Malate dehydrogenase, cytoplasmic	Mdh1
6.0491	6.80168						13	13	13	29.6	29.6	29.6	60.718	0	253430000	19	6	13	6	13	7.58059	8.33317	n. def.	n. def.	P14685;Q3ULJ5;Q8BK46;Q3U5M8;F7B7L8	P14685;Q3ULJ5;Q8BK46;Q3U5M8	26S proteasome non-ATPase regulatory subunit 3	Psmd3
8.66235	8.34749				OLIG2		62	62	55	73.6	73.6	67	66.785	0	24557000000	218	60	54	54	48	10.2187	9.90378	n. def.	n. def.	P14733;Q8C553	P14733;Q8C553	Lamin-B1	Lmnb1
7.2915	7.77327						5	5	5	27.1	27.1	27.1	34.216	0	1025600000	13	3	5	3	5	8.40545	8.88721	n. def.	n. def.	Q5M8R8;Q5FWB6;P14869;D3YVM5;S4R1N1;O89073	Q5M8R8;Q5FWB6;P14869;D3YVM5;S4R1N1	60S acidic ribosomal protein P0	Rplp0
8.37769	8.42154						12	3	3	33	9.9	9.9	21.266	0	4523200000	49	12	12	3	3	9.33193	9.37579	n. def.	n. def.	Q5SZA3;P15864	Q5SZA3;P15864	Histone H1.2	Hist1h1c
6.81301	7.50939						3	3	3	33.3	33.3	33.3	14.866	0	349340000	10	2	3	2	3	7.76726	8.46362	n. def.	n. def.	P16045	P16045	Galectin-1	Lgals1
6.63267	6.91873						7	6	6	26.9	23.4	23.4	36.572	0	213950000	12	5	5	4	4	7.86311	8.14919	n. def.	n. def.	P16125;D3Z7F0;A0A0N4SVV8;Q5M8R7	P16125;D3Z7F0	L-lactate dehydrogenase B chain;L-lactate dehydrogenase	Ldhb
7.16578	7.36763						17	17	15	48.4	48.4	45.2	47.14	0	835170000	33	11	16	10	14	8.50819	8.71005	n. def.	n. def.	Q5FW97;P17182;Q6PHC1;Q8CF78;B1ARR7;B0QZL1;B1ARR6;A0A0N4SUI6;D3YVD3;D3Z2S4;D3Z6E4;Q922A0;A0A0N4SUX5;Q545V3;Q3UJ20;P17183;A0A0N4SUW8;J3QPZ9	Q5FW97;P17182;Q6PHC1;Q8CF78	Alpha-enolase;Enolase	Eno1
n. def.	5.76772						4	4	2	5.9	5.9	3.9	105.48	0	31045000	4	0	4	0	2	n. def.	7.49199	n. def.	n. def.	P17426-2;P17426;A0A140LIG7;A0A140LHG0	P17426-2;P17426;A0A140LIG7	AP-2 complex subunit alpha-1	Ap2a1
n. def.	5.84468						3	1	1	5	3	3	104	0	34966000	3	0	3	0	1	n. def.	7.54365	n. def.	n. def.	Q6PEE6;Q3U7X9;P17427;Q69ZW4	Q6PEE6;Q3U7X9;P17427;Q69ZW4	AP-2 complex subunit alpha-2	Ap2a2
7.72638	8.04906						11	11	11	74.4	74.4	74.4	17.971	0	1652200000	39	10	10	10	10	8.72638	9.04906	n. def.	n. def.	Q5SVY2;Q3UAJ1;Q3TE63;P17742;Q9CZK9;A0A1L1SST0;F8VPN3;V9GXC1;V9GX31;A0A1L1SRX5	Q5SVY2;Q3UAJ1;Q3TE63;P17742;Q9CZK9;A0A1L1SST0	Peptidyl-prolyl cis-trans isomerase;Peptidyl-prolyl cis-trans isomerase A;Peptidyl-prolyl cis-trans isomerase A, N-terminally processed	Ppia
7.27907	8.11797						11	11	10	74.7	74.7	68.1	18.559	0	1502300000	22	7	9	7	8	8.27907	9.11797	n. def.	n. def.	Q544Y7;P18760;F8WGL3;Q9CX22	Q544Y7;P18760;F8WGL3;Q9CX22	Cofilin-1	Cfl1
6.97284	7.30298						72	72	72	39.1	39.1	39.1	272.43	0	3479100000	138	50	60	50	60	9.04474	9.37486	n. def.	n. def.	P19096;A0A0U1RNJ1;Q3UHT6;Q3TB22;O89060;A0A0U1RPP5	P19096;A0A0U1RNJ1;Q3UHT6;Q3TB22	Fatty acid synthase;[Acyl-carrier-protein] S-acetyltransferase;[Acyl-carrier-protein] S-malonyltransferase;3-oxoacyl-[acyl-carrier-protein] synthase;3-oxoacyl-[acyl-carrier-protein] reductase;3-hydroxyacyl-[acyl-carrier-protein] dehydratase;Enoyl-[acyl-carrier-protein] reductase;Oleoyl-[acyl-carrier-protein] hydrolase	Fasn
5.66055	6.64486						2	2	2	14.8	14.8	14.8	23.609	0.0024793	58463000	4	1	2	1	2	6.73973	7.72404	n. def.	n. def.	P19157;K9JA74;P46425	P19157;K9JA74;P46425	Glutathione S-transferase P 1;Glutathione S-transferase P 2	Gstp1;Gstp2
7.44618	7.71717						8	8	8	28.6	28.6	28.6	23.464	0	720690000	17	5	7	5	7	8.40042	8.67141	n. def.	n. def.	Q5M9M0;P19253;A0A1B0GSB2;A0A1B0GSQ6;A0A1B0GS68;A0A1B0GTA1;A0A1B0GT00;Q3TDS9;A0A1B0GSC2;A0A1B0GRH1;A0A1B0GSL5;A0A1B0GSJ2;A0A140T8K2;A0A1B0GQW6;A0A1B0GSF0	Q5M9M0;P19253;A0A1B0GSB2;A0A1B0GSQ6;A0A1B0GS68;A0A1B0GTA1;A0A1B0GT00;Q3TDS9	60S ribosomal protein L13a	Rpl13a
5.96353	6.71528						5	5	5	15.8	15.8	15.8	46.51	0	140550000	11	3	5	3	5	7.32525	8.077	n. def.	n. def.	Q8BVU9;Q8BV87;Q3TWG9;Q3TMD2;Q3TJK3;P19324;A0A140LHR4;A0A140LHK0	Q8BVU9;Q8BV87;Q3TWG9;Q3TMD2;Q3TJK3;P19324	Serpin H1	Serpinh1
6.83394	7.07155						13	11	11	23.2	21.5	21.5	72.422	0	558410000	17	9	8	7	6	8.31108	8.54867	n. def.	n. def.	Q9DC41;Q3U9G2;Q3TWF2;P20029;Q3U7T8;Q3U6V3;Q3TKF8;Q3TI47;Q3UEM8;Q3TUS2	Q9DC41;Q3U9G2;Q3TWF2;P20029;Q3U7T8;Q3U6V3;Q3TKF8;Q3TI47;Q3UEM8	78 kDa glucose-regulated protein	Hspa5
8.37809	8.33486						58	58	55	88.2	88.2	85	53.687	0	15471000000	166	50	44	47	42	9.90957	9.86633	248	55	Q5FWJ3;P20152;Q3TFD9;Q3U6S1;Q3V2S4;A0A0A6YWC8;Q3UAX1;Q3TWV0;Q3UD36;A4IF59;A2AKJ2;P15331-3;Q3V2C6;Q3V1K9;P31001;P15331;G5E846;P15331-2;G3X981;Q9DCV7;CON__Q9DCV7;CON__Q3KNV1;CON__P08729;Q9JJY2;CON__Q9H552;CON__Q9NSB2;CON__Q6ISB0;Q3UMG4;Q4L0E6;P03995-2;P03995;CON__H-INV:HIT000292931;D3YZ35;E9Q1Y9;CON__Q61726;Q9ERE2;P97861;CON__O43790;B2RTB6;CON__Q6NT21;CON__P78385;Q6IMF0;Q61726;P46660;CON__Q14533;Q9…	Q5FWJ3;P20152;Q3TFD9;Q3U6S1;Q3V2S4;A0A0A6YWC8;Q3UAX1;Q3TWV0;Q3UD36;A4IF59	Vimentin	Vim
5.75678	6.36325						6	1	0	4.3	0.9	0	199.13	0.0057887	250500000	12	4	5	0	0	7.6963	8.30279	249	1783	P20357	P20357	Microtubule-associated protein 2	Map2
6.47435	6.61679						8	8	3	33.1	33.1	9.7	29.02	0	113900000	12	5	5	3	1	7.67846	7.82091	n. def.	n. def.	Q58E70;P21107-2;D3Z6I8;Q8C7C3;E9Q7Q3;Q3TJ53;D3Z2H9;G5E8R0;E9Q453;G5E8R2;G5E8R1;E9Q456;E9Q455;E9Q452;Q8BSH3;Q8BP43;Q564G1;Q545Y3;P58771-2;P58771;E9Q450;E9Q448;B7ZNL3;E9Q454;F8WID5	Q58E70;P21107-2;D3Z6I8;Q8C7C3;E9Q7Q3;Q3TJ53;D3Z2H9	Tropomyosin alpha-3 chain	Tpm3;Tpm3-rs7
6.24115	6.44897	+					3	1	1	8.3	5.1	5.1	46.997	1	91081000	6	2	2	1	0	7.54217	7.75	250	40	Q4FK59;P21550;Q5SX61;Q5SX60;Q5SX59	Q4FK59;P21550;Q5SX61;Q5SX60;Q5SX59	Beta-enolase	Eno3
7.5989	7.21						34	27	27	55	48.5	48.5	67.317	0	2069300000	69	32	22	26	16	9.16711	8.77819	n. def.	n. def.	P21619;A0A0R4J0Q5;Q3V159;P21619-2	P21619;A0A0R4J0Q5;Q3V159;P21619-2	Lamin-B2	Lmnb2
5.16167	5.28968						3	3	3	3.8	3.8	3.8	91.349	0	11898000	4	1	3	1	3	6.70574	6.83374	n. def.	n. def.	P22892;Q8CBB7;Q3UKX8;Q8CC03;Q8BSZ7	P22892;Q8CBB7;Q3UKX8;Q8CC03	AP-1 complex subunit gamma-1	Ap1g1
6.14489	6.64948						17	17	17	15.3	15.3	15.3	161.93	0	339730000	31	11	16	11	16	7.9083	8.41291	n. def.	n. def.	P23116;Q3UL99;Q3UEK3;Q3TKF9;Q3UM46;Q6A0B9;Q3TRH1	P23116;Q3UL99;Q3UEK3;Q3TKF9;Q3UM46;Q6A0B9	Eukaryotic translation initiation factor 3 subunit A	Eif3a
7.01456	7.80255				OLIG2		6	6	5	42.6	42.6	36.1	20.811	0	516660000	17	3	6	2	5	7.85966	8.64766	n. def.	n. def.	Q9DCC5;Q32P00;P23198;I6L9I7;D3Z313;D3Z1A9;Q7TPM0;Q9CYJ8;P83917	Q9DCC5;Q32P00;P23198;I6L9I7	Chromobox protein homolog 3	Cbx3
5.45909	6.12519						3	3	3	8	8	8	59.697	0	51902000	5	1	3	1	3	6.96425	7.63035	n. def.	n. def.	Q3UF58;Q8C6E3;Q542K4;Q3UZE7;Q3TVZ1;P24270;Q91XI2;A2AL20	Q3UF58;Q8C6E3;Q542K4;Q3UZE7;Q3TVZ1;P24270;Q91XI2	Catalase	Cat
n. def.	5.54209						2	2	2	3.8	3.8	3.8	69.05	0	12891000	2	0	2	0	2	n. def.	7.11029	n. def.	n. def.	P24527	P24527	Leukotriene A-4 hydrolase	Lta4h
5.55601	5.54185						2	2	2	5.8	5.8	5.8	55.863	0	15576000	2	1	1	1	1	6.89844	6.88427	n. def.	n. def.	Q3UPJ2;Q3UAT9;Q3U9N8;P24547;A0A0A6YXS4	Q3UPJ2;Q3UAT9;Q3U9N8;P24547;A0A0A6YXS4	Inosine-5-monophosphate dehydrogenase;Inosine-5-monophosphate dehydrogenase 2	Impdh2
5.74541	6.61085						14	14	14	22.9	22.9	22.9	91.544	0	231910000	17	4	12	4	12	7.44439	8.30982	n. def.	n. def.	Q3UZH2;Q3ULD6;Q3UI57;P25206	Q3UZH2;Q3ULD6;Q3UI57;P25206	DNA replication licensing factor MCM3	Mcm3
7.303	7.70208						12	12	12	46.1	46.1	46.1	31.231	0	1268100000	26	9	12	9	12	8.55826	8.95735	n. def.	n. def.	Q58EU3;Q3TXS9;P25444;Q3TXR5;D3YVC1;Q3TLE5;Q3UB36;D3YWJ3;A0A140T8L5;Q3TL20;Q3TI78;Q9DC49;E9Q1N8;F6YTZ4;O89072;Q3V2B9;D3Z536	Q58EU3;Q3TXS9;P25444;Q3TXR5;D3YVC1;Q3TLE5;Q3UB36;D3YWJ3;A0A140T8L5;Q3TL20;Q3TI78;Q9DC49;E9Q1N8;F6YTZ4;O89072	40S ribosomal protein S2	Rps2;Gm18025;Gm6576
4.41138	5.38587						6	6	6	2.8	2.8	2.8	269.83	0	36037000	5	2	5	2	5	6.53849	7.51298	n. def.	n. def.	Q3UHS6;P26039;Q80TM2;Q3TBC3;Q0V930;Q6PB69;Q9CS79;A0A1L1SQP9;Q8CDM9;Q8CHG4;A0A1L1SRI1;Q68FD6;E9PUM4;B2RY15;A0A1L1SQ51;Q71LX4;F6S1V7;A2AIM2;Q8C9Z8	Q3UHS6;P26039;Q80TM2;Q3TBC3;Q0V930;Q6PB69;Q9CS79;A0A1L1SQP9;Q8CDM9;Q8CHG4;A0A1L1SRI1;Q68FD6;E9PUM4;B2RY15;A0A1L1SQ51	Talin-1	Tln1;Tln2
6.48514	6.70731						13	13	13	26	26	26	67.766	0	269050000	18	6	10	6	10	8.00368	8.22583	n. def.	n. def.	P26041;Q05DU4;Q3TZQ2;P26043;Q3TH46;Q3U111;Q8C2N4;Q7TSG6;Q05CE6;Q4KML7;Q3UXR4;Q3UL48;Q3TCP5;P26040;Q3UJJ8;Q8CBU4;Q3UF33	P26041;Q05DU4;Q3TZQ2	Moesin	Msn
n. def.	4.99675						1	1	1	1.4	1.4	1.4	100.11	0.0059925	4665000	1	0	1	0	1	n. def.	6.66885	n. def.	n. def.	Q6NV50;Q545R0;Q3TGQ3;P26231	Q6NV50;Q545R0;Q3TGQ3;P26231	Catenin alpha-1	Ctnna1
6.64308	6.92896						1	1	1	35.1	35.1	35.1	4.0215	0	25774000	3	1	1	1	1	6.94411	7.22999	n. def.	n. def.	Q1JUQ7;Q1JUQ8;Q1JUQ6;Q3ULN5;P26883	Q1JUQ7;Q1JUQ8;Q1JUQ6;Q3ULN5;P26883	Peptidyl-prolyl cis-trans isomerase;Peptidyl-prolyl cis-trans isomerase FKBP1A	Fkbp1a
5.91414	6.32956						3	3	3	12.6	12.6	12.6	23.656	0	44346000	6	3	3	3	3	7.09022	7.50565	n. def.	n. def.	P27048;Q3UN87;P63163;A0A0G2JGN4;O70499	P27048;Q3UN87;P63163;A0A0G2JGN4;O70499	Small nuclear ribonucleoprotein-associated protein B;Small nuclear ribonucleoprotein-associated protein;Small nuclear ribonucleoprotein-associated protein N	Snrpb;Snrpn
n. def.	6.16337						8	8	8	14.4	14.4	14.4	87.22	0	67008000	9	1	8	1	8	n. def.	7.82613	n. def.	n. def.	P27612;F7D1R5	P27612	Phospholipase A-2-activating protein	Plaa
7.57046	7.92843						16	16	16	38	38	38	46.079	0	2318000000	49	15	14	15	14	8.84921	9.20718	n. def.	n. def.	Q3UB90;Q3UB67;Q3UB15;Q3U9L3;Q3T9U9;P27659;A0A087WNS0;A0A087WQK0;Q99N25;Q9CQ09;Q5U470;E9PWZ3	Q3UB90;Q3UB67;Q3UB15;Q3U9L3;Q3T9U9;P27659	60S ribosomal protein L3	Rpl3
5.93673	6.06502						11	11	11	29.9	29.9	29.9	56.678	0	62803000	11	5	7	5	7	7.42809	7.55637	n. def.	n. def.	P27773;F6Q404	P27773	Protein disulfide-isomerase A3	Pdia3
n. def.	5.13893						2	2	2	4.4	4.4	4.4	98.124	0	5783600	2	0	2	0	2	n. def.	6.7622	n. def.	n. def.	P28271;Q8VDC3	P28271;Q8VDC3	Cytoplasmic aconitate hydratase	Aco1
n. def.	5.81285						3	3	3	15.5	15.5	15.5	35.49	0	9098600	2	0	3	0	3	n. def.	6.95897	n. def.	n. def.	Q544Z7;P28352;D3Z124;F6QA74;D3Z6R9	Q544Z7;P28352;D3Z124;F6QA74	DNA-(apurinic or apyrimidinic site) lyase;DNA-(apurinic or apyrimidinic site) lyase, mitochondrial	Apex1
6.74773	7.33367						14	14	14	38.8	38.8	38.8	54.103	0	624570000	27	6	13	6	13	8.10944	8.69539	n. def.	n. def.	Q5SVI9;Q5SVJ1;Q5SVI3;Q5SVI0;Q5SVI2;Q8BL41;P28652;Q68EG2;Q5SVI1;Q5SVJ0;Q3TY93;Q923T9-3;Q6ZWS7;Q923T9-2;Q923T9;Q8CCM0;Q6PHZ2-2;E9Q1V9;Q6PHZ2-4;Q6PHZ2;Q6PHZ2-5;E9Q1W0;E9Q1T1;A0A0G2JGS4;Q8C4I3;Q8C8X9;P11798;Q80TN1;F8WIS9;F6WHR9;Q8BW40	Q5SVI9;Q5SVJ1;Q5SVI3;Q5SVI0;Q5SVI2;Q8BL41;P28652;Q68EG2;Q5SVI1;Q5SVJ0;Q3TY93;Q923T9-3;Q6ZWS7;Q923T9-2;Q923T9	Calcium/calmodulin-dependent protein kinase type II subunit beta;Calcium/calmodulin-dependent protein kinase type II subunit gamma	Camk2b;Camk2g
5.57078	6.21163						3	3	3	8.2	8.2	8.2	53.71	0	56003000	6	1	3	1	3	7.01795	7.65878	n. def.	n. def.	Q3TKP3;Q3TCF4;P28658;Q8BWX1	Q3TKP3;Q3TCF4;P28658;Q8BWX1	Ataxin-10	Atxn10
5.5239	n. def.						2	2	2	14	14	14	20.165	0	2338800	2	2	0	2	0	6.36899	n. def.	n. def.	n. def.	P28667	P28667	MARCKS-related protein	Marcksl1
n. def.	5.70357						4	1	1	7.7	2.7	2.7	74.844	0.0024631	15160000	4	0	4	0	1	n. def.	7.1807	n. def.	n. def.	P28740-2;F6SUU5	P28740-2;F6SUU5	Kinesin-like protein KIF2A	Kif2a
6.74234	7.00766						12	12	8	23.4	23.4	16.7	70.669	0	565310000	22	11	11	7	7	8.29863	8.56396	n. def.	n. def.	Q8BN32;Q3U8U8;P29341;Q99KL3;Q9D4E6;Q9DBE3;Q792Y0;Q62029;Q05DT1;V9GXG3;Q3V2M1;B2RXY9;A2A5N3	Q8BN32;Q3U8U8;P29341;Q99KL3;Q9D4E6	Polyadenylate-binding protein 1	Pabpc1;Pabpc6
6.17658	6.75053						3	2	2	13.2	10.6	10.6	33.77	0	114110000	6	1	3	0	2	7.3807	7.95465	n. def.	n. def.	Q8BP21;Q545C3;P30285;E9Q9E4;E9PZX7;Q9D193;Q9CSQ6;D6RHS5;Q9JKW8;D3YWB0;Q99J95-3;A0A0G2JDL3;Q9CYR7;Q0VDL5;Q99J95-2;Q64261;Q3U4J9;Q0VBK8;Q8C411;Q8BN81;O35495-3;Q6NVF8;O35495-2;Q8K0D0-2;I6L9D3;Q3V3A1-3;Q3V3A1;E3W997;Q0VDL6;Q04899;E9PVC7;Q3TM24;Q04735-2;O35495;A0A1L1SUS7;Q91WP4;Q543G3;Q3UPI3;Q04735;Q8K0D0;Q14AX6-2;Q69ZA1-2;Q14AX6-3;Q14AX6;Q69ZA1	Q8BP21;Q545C3;P30285;E9Q9E4;E9PZX7;Q9D193	Cyclin-dependent kinase 4	Cdk4
5.64877	5.06164						3	3	3	8.3	8.3	8.3	51.572	0	17381000	5	2	1	2	1	7.14013	6.55298	n. def.	n. def.	P30416;F6S2D5;F7CAT1	P30416;F6S2D5	Peptidyl-prolyl cis-trans isomerase FKBP4;Peptidyl-prolyl cis-trans isomerase FKBP4, N-terminally processed;Peptidyl-prolyl cis-trans isomerase	Fkbp4
7.41449	7.88231				TCF4		11	9	9	48.1	36.5	36.5	20.533	0	511160000	20	6	10	5	8	8.11344	8.58128	n. def.	n. def.	Q3UAZ7;Q9CT19;Q3U566;P30681;A0A1B0GQX9	Q3UAZ7;Q9CT19;Q3U566;P30681	High mobility group protein B2	Hmgb2
6.15806	6.63738						6	6	6	34.8	34.8	34.8	33.997	0	98224000	10	3	6	3	6	7.38851	7.86783	n. def.	n. def.	P31230;Q3UZG4;Q8C2U7;A0A0G2JDW6	P31230;Q3UZG4;Q8C2U7	Aminoacyl tRNA synthase complex-interacting multifunctional protein 1;Endothelial monocyte-activating polypeptide 2	Aimp1
n. def.	7.19165						2	2	2	36.8	36.8	36.8	10	0	62189000	2	0	2	0	2	n. def.	7.79371	n. def.	n. def.	Q548W7;P31786;D3Z563;M0QWU8;Q3ULV8;Q4VWZ5	Q548W7;P31786;D3Z563;M0QWU8;Q3ULV8;Q4VWZ5	Acyl-CoA-binding protein	Dbi
n. def.	5.85848						2	2	2	9.2	9.2	9.2	43.374	0	13716000	2	0	2	0	2	n. def.	7.13723	n. def.	n. def.	Q9JJE1;Q3UK05;Q3U3F4;Q3TMJ8;P31938;Q3TMW4;Q91YS7;Q63932	Q9JJE1;Q3UK05;Q3U3F4;Q3TMJ8;P31938;Q3TMW4;Q91YS7;Q63932	Dual specificity mitogen-activated protein kinase kinase 1;Dual specificity mitogen-activated protein kinase kinase 2	Map2k1;Map2k2
6.34357	6.68238						9	9	9	27.2	27.2	27.2	47.657	0	161420000	15	4	9	4	9	7.70529	8.04411	n. def.	n. def.	Q8BTU4;Q564E6;Q3TG93;P32067;Q9CYB9;F6SXM5;A2AR07;D6RI87	Q8BTU4;Q564E6;Q3TG93;P32067;Q9CYB9;F6SXM5	Lupus La protein homolog	Ssb
n. def.	6.24043						10	10	6	11	11	7	139.52	0	102630000	13	0	10	0	6	n. def.	8.01127	n. def.	n. def.	P33174;Q3UXW0	P33174	Chromosome-associated kinesin KIF4	Kif4
n. def.	5.68716						3	3	3	9.1	9.1	9.1	58.448	0	13625000	4	0	3	0	3	n. def.	7.13434	n. def.	n. def.	Q3THK0;P33610;Q3TL46	Q3THK0;P33610;Q3TL46	DNA primase large subunit	Prim2
6.09405	6.34112						2	2	2	12	12	12	23.412	0	37787000	5	2	2	2	2	7.13542	7.3825	n. def.	n. def.	Q3TJ39;P35278;Q8C266;Q3TCT9	Q3TJ39;P35278;Q8C266;Q3TCT9	Ras-related protein Rab-5C	Rab5c
n. def.	6.69864						3	3	3	16.8	16.8	16.8	23.545	0	64951000	5	1	3	1	3	n. def.	7.81259	n. def.	n. def.	Q3U4W5;Q0PD54;Q0PD53;P61294;P35279-2;P35279;A0A1L1SRS6;D3YV69;Q8BHD0;Q0PD15	Q3U4W5;Q0PD54;Q0PD53;P61294;P35279-2;P35279;A0A1L1SRS6;D3YV69	Ras-related protein Rab-6B;Ras-related protein Rab-6A	Rab6a;Rab6b
6.05003	6.5101						4	4	4	17.2	17.2	17.2	43.231	0	95894000	8	3	4	3	4	7.39247	7.85252	n. def.	n. def.	Q3UFJ3;P35486	Q3UFJ3;P35486	Pyruvate dehydrogenase E1 component subunit alpha, somatic form, mitochondrial	Pdha1
6.64309	7.09423						9	9	9	46.2	46.2	46.2	34.375	0	336380000	16	5	8	5	8	7.94412	8.39526	n. def.	n. def.	Q3UJS2;P35550;A0A140LIR6;Q80WS3	Q3UJS2;P35550	rRNA 2-O-methyltransferase fibrillarin	Fbl
5.24556	5.83383						2	2	2	5.1	5.1	5.1	67.277	0	27459000	4	1	2	1	2	6.7507	7.33899	n. def.	n. def.	Q5SUC3;Q3TXE5;P35564	Q5SUC3;Q3TXE5;P35564	Calnexin	Canx
5.29612	6.26616						5	5	5	12.8	12.8	12.8	48.542	0	51087000	8	2	4	2	4	6.69405	7.66411	n. def.	n. def.	Q3UG16;P35585;Q9WVP1;A0A0R4IZX6;Q9WVP1-2;A0A0R4J1L4;Q8C9K8;A0A1D5RLL9;A0A1D5RMJ1;A0A1D5RLW6;D3YZ71;A0A1L1SUA0	Q3UG16;P35585	AP-1 complex subunit mu-1	Ap1m1
6.8536	7.17208						9	9	8	55.3	55.3	55.3	22.176	0	330010000	18	7	7	6	6	8.02967	8.34817	n. def.	n. def.	P35700;B1AXW5;B1AXW6;Q3U9J9;B1AXW4	P35700;B1AXW5;B1AXW6;Q3U9J9	Peroxiredoxin-1	Prdx1
7.44276	8.18495						6	6	6	54.5	54.5	54.5	17.804	0	1627300000	21	4	6	4	6	8.397	9.13919	n. def.	n. def.	Q5BLK0;Q3TIQ2;P35979;Q8C2K0;Q6DI58;F8VQK7	Q5BLK0;Q3TIQ2;P35979;Q8C2K0;Q6DI58	60S ribosomal protein L12	Rpl12
n. def.	5.06629						2	2	2	3.7	3.7	3.7	102.25	0.0059435	5591500	2	0	2	0	2	n. def.	6.74753	n. def.	n. def.	Q8R055;P37913;Q3U4X8;E9PV36;V9GWZ4;Q3TSU8	Q8R055;P37913;Q3U4X8;E9PV36;V9GWZ4;Q3TSU8	DNA ligase;DNA ligase 1	Lig1
6.20436	6.38579						7	7	7	11.8	11.8	11.8	73.46	0	153210000	16	6	6	6	6	7.78414	7.96556	n. def.	n. def.	P38647	P38647	Stress-70 protein, mitochondrial	Hspa9
n. def.	6.58563						2	2	2	7.1	7.1	7.1	42.3	0	73178000	3	0	2	0	2	n. def.	7.86438	n. def.	n. def.	Q99M86;P39749;Q91Z50;Q8R069;Q8C952;Q3TGH6;Q8C5X6	Q99M86;P39749;Q91Z50;Q8R069;Q8C952;Q3TGH6;Q8C5X6	Flap endonuclease 1	Fen1
n. def.	5.65247						4	4	4	15.6	15.6	15.6	51.55	0	12129000	6	0	4	0	4	n. def.	7.08382	n. def.	n. def.	Q3UVJ2;Q3UNQ0;Q3U0U5;Q3TC53;P40124;B1ARS0	Q3UVJ2;Q3UNQ0;Q3U0U5;Q3TC53;P40124;B1ARS0	Adenylyl cyclase-associated protein;Adenylyl cyclase-associated protein 1	Cap1
6.85862	7.52156						18	18	18	39.8	39.8	39.8	67.63	0	1051800000	43	8	17	8	17	8.2736	8.93653	n. def.	n. def.	P40142;O55021;Q9Z2L5	P40142	Transketolase	Tkt
7.32617	7.60387						7	7	7	36.5	36.5	36.5	15.709	0	490870000	14	5	7	5	7	8.22925	8.50695	n. def.	n. def.	Q5M9N5;Q5M9J8;P41105	Q5M9N5;Q5M9J8;P41105	60S ribosomal protein L28	Rpl28
5.17528	5.99427						3	3	3	8.6	8.6	8.6	83.125	0	44328000	6	1	3	1	3	6.76636	7.58534	n. def.	n. def.	Q6GU23;P42227-2;Q3ULI4;Q3U5Q4;P42227;B7ZC18;P42227-3;Q3U6S9;Q8CFJ6	Q6GU23;P42227-2;Q3ULI4;Q3U5Q4;P42227;B7ZC18;P42227-3;Q3U6S9	Signal transducer and activator of transcription 3	Stat3
n. def.	5.82462						1	1	1	2.8	2.8	2.8	34.868	0.0053517	5342100	1	0	1	0	1	n. def.	6.72771	n. def.	n. def.	Q8C6E9;P42669	Q8C6E9;P42669	Transcriptional activator protein Pur-alpha	Pura
6.68327	6.90167						17	17	17	38	38	38	59.554	0	447870000	24	10	13	10	13	8.22735	8.44573	n. def.	n. def.	Q8BVY8;Q3UL22;Q3UKQ2;P42932;Q6A0F1;Q9WVS5;H3BL49;Q9CS06;Q9CRW7;H3BJB6;H3BLL1;H3BKG2;H3BKR8	Q8BVY8;Q3UL22;Q3UKQ2;P42932;Q6A0F1;Q9WVS5;H3BL49;Q9CS06	T-complex protein 1 subunit theta	Cct8
n. def.	6.28308						5	4	4	15.4	13.3	13.3	41.986	0	40300000	5	0	5	0	4	n. def.	7.60531	n. def.	n. def.	Q3UIT0;P43136;F7DC78;F6Q454	Q3UIT0;P43136	Nuclear receptor subfamily 2 group F member 6	Nr2f6
n. def.	5.72236						2	2	2	2.6	2.6	2.6	104.2	0	23745000	3	0	2	0	2	n. def.	7.37557	n. def.	n. def.	Q80V79;Q3TZI5;P43247;G3UXD8	Q80V79;Q3TZI5;P43247;G3UXD8	DNA mismatch repair protein Msh2	Msh2
8.28988	8.28535						13	13	6	32.4	32.4	16	21.977	0	3490500000	48	13	13	6	6	9.24413	9.2396	404	18	P43274	P43274	Histone H1.4	Hist1h1e
7.99333	8.0758						7	6	6	31.5	27.2	27.2	21.785	0	1522800000	24	7	6	6	5	8.83843	8.92089	n. def.	n. def.	P43275	P43275	Histone H1.1	Hist1h1a
8.03937	7.9732						11	10	10	27.9	23	23	22.445	0	1831600000	49	11	9	10	8	8.99363	8.92744	251	17	Q1WWK3;P43276;Q3UXH2	Q1WWK3;P43276	Histone H1.5	Hist1h1b
8.34751	8.43112						12	5	3	31.7	15.4	9.5	22.081	0	4924400000	46	12	12	3	3	9.34751	9.43112	405	18	Q3U292;Q149Z9;P43277;Q07133;I7HFT9	Q3U292;Q149Z9;P43277	Histone H1.3	Hist1h1d
n. def.	5.68052						1	1	1	5.8	5.8	5.8	35.051	0	8625700	0	0	1	0	1	n. def.	6.93579	n. def.	n. def.	Q3TCL2;Q5U415;Q3UDY1;P45376	Q3TCL2;Q5U415;Q3UDY1;P45376	Aldose reductase	Akr1b3;Akr1b1
n. def.	7.25515						2	1	1	18.7	12	12	18.709	0	197950000	2	0	2	0	1	n. def.	8.29656	n. def.	n. def.	Q3UHW9;P45591	Q3UHW9;P45591	Cofilin-2	Cfl2
n. def.	5.54356						2	2	2	5.6	5.6	5.6	43.189	0.0059657	5943000	2	0	2	0	2	n. def.	6.77401	n. def.	n. def.	Q3UZD8;Q91YS2;Q8C2E3;Q7TMW1;P46061;Q6ZPH4;Q9CW20;Q3ULJ9	Q3UZD8;Q91YS2;Q8C2E3;Q7TMW1;P46061;Q6ZPH4;Q9CW20;Q3ULJ9	Ran GTPase-activating protein 1	Rangap1
n. def.	5.40099						1	1	1	1.7	1.7	1.7	82.613	0	11833000	2	1	1	1	1	n. def.	7.07309	n. def.	n. def.	P46460	P46460	Vesicle-fusing ATPase	Nsf
5.96757	6.49507						7	7	7	22.6	22.6	22.6	48.677	0	113530000	13	3	7	3	7	7.41472	7.94223	n. def.	n. def.	Q3UIH5;P46471;Q8BVQ9;Q3U5V3	Q3UIH5;P46471;Q8BVQ9;Q3U5V3	26S protease regulatory subunit 7	Psmc2
n. def.	n. def.	+					1	1	1	3	3	3	41.772	1	0	1	0	1	0	1	n. def.	n. def.	252	6	P47226-2	P47226-2
n. def.	6.29246						2	2	2	11.5	11.5	11.5	32.967	0	25492000	2	0	2	0	2	n. def.	7.4064	n. def.	n. def.	Q5DQJ3;Q3UCD2;Q3UBZ3;P47754;A0A0N4SVM0;D6RCW7;Q3U7G3	Q5DQJ3;Q3UCD2;Q3UBZ3;P47754;A0A0N4SVM0;D6RCW7;Q3U7G3	F-actin-capping protein subunit alpha-2	Capza2
5.82758	5.98198						1	1	1	5.7	5.7	5.7	32.227	0.0089965	21212000	2	1	1	1	1	6.94152	7.09594	n. def.	n. def.	Q1LZL7;Q99K08;P47857;P47857-2;P47857-3	Q1LZL7;Q99K08;P47857;P47857-2;P47857-3	6-phosphofructokinase;6-phosphofructokinase, muscle type	Pfkm
7.7403	8.03774						17	17	17	47.3	47.3	47.3	33.509	0	2297000000	43	14	17	14	17	8.88643	9.18387	n. def.	n. def.	Q3UCH0;P47911;Q3UFI4;A0A0J9YU32	Q3UCH0;P47911;Q3UFI4	60S ribosomal protein L6	Rpl6
7.53204	7.77438						10	10	10	42.9	42.9	42.9	34.269	0	1028800000	31	8	10	8	10	8.57344	8.81577	n. def.	n. def.	Q3TKR5;Q58EU6;P47962;Q3U850;D3YYV8;Q3THE1	Q3TKR5;Q58EU6;P47962;Q3U850;D3YYV8;Q3THE1	60S ribosomal protein L5	Rpl5
7.94235	8.07842						14	14	14	57.3	57.3	57.3	24.305	0	1866300000	28	13	10	13	10	8.89659	9.0327	n. def.	n. def.	P47963;Q5RKP3;A0A140T8K8	P47963;Q5RKP3;A0A140T8K8	60S ribosomal protein L13	Rpl13
n. def.	6.69276						1	1	1	29.2	29.2	29.2	12.746	0	24645000	1	0	1	0	1	n. def.	7.39173	n. def.	n. def.	Q4V9T8;Q3UBT8;P48024	Q4V9T8;Q3UBT8;P48024	Eukaryotic translation initiation factor 1	Eif1
7.53813	7.13245						33	31	31	47.7	46.3	46.3	74.237	0	2067900000	64	31	21	29	19	9.17161	8.76591	n. def.	n. def.	P48678;P48678-2;P48678-3;D3YUF7;Q9CTL2;Q8BNX5	P48678;P48678-2;P48678-3	Prelamin-A/C;Lamin-A/C	Lmna
5.67849	6.02428						1	1	1	3.4	3.4	3.4	32.904	0.00088652	30690000	2	1	1	1	1	6.97952	7.32533	n. def.	n. def.	Q8BVI9;Q545A2;P51881;P48962	Q8BVI9;Q545A2;P51881;P48962	ADP/ATP translocase 2;ADP/ATP translocase 2, N-terminally processed;ADP/ATP translocase 1	Slc25a4;Slc25a5
7.48234	7.65347						17	17	17	51.9	51.9	51.9	34.238	0	1357000000	39	14	16	14	16	8.73761	8.90874	n. def.	n. def.	Q3U7F3;Q3TIK8;P49312;Q5EBP8;Q3UK83;Q3TFB1;P49312-2;B7ZWG9;V9GXF8	Q3U7F3;Q3TIK8;P49312;Q5EBP8;Q3UK83;Q3TFB1;P49312-2	Heterogeneous nuclear ribonucleoprotein A1	Hnrnpa1
n. def.	5.77846						1	1	1	3.5	3.5	3.5	38.759	0.00083822	12609000	1	0	1	0	1	n. def.	7.10068	n. def.	n. def.	Q811Q9-2;P49586;Q811Q9	Q811Q9-2;P49586;Q811Q9	Choline-phosphate cytidylyltransferase B;Choline-phosphate cytidylyltransferase A	Pcyt1b;Pcyt1a
6.10195	6.60999						2	1	1	6.5	3.8	3.8	33.288	0.00087108	101430000	6	1	2	0	1	7.3807	7.88874	n. def.	n. def.	Q543F6;P49615	Q543F6;P49615	Cyclin-dependent kinase 5	Cdk5
5.55521	6.69721						13	13	13	19.1	19.1	19.1	96.764	0	229570000	16	3	12	3	12	7.18868	8.33068	n. def.	n. def.	Q9D077;Q921D5;Q8C1Z0;Q542F4;Q3UA65;P49717;Q5DTS8;Q3UXG9;Q9CWV1-2;Q9CWV1	Q9D077;Q921D5;Q8C1Z0;Q542F4;Q3UA65;P49717;Q5DTS8	DNA replication licensing factor MCM4	Mcm4
n. def.	6.08253						1	1	1	10.4	10.4	10.4	20.786	0	12093000	1	0	1	0	1	n. def.	7.08253	n. def.	n. def.	Q8BKE0;Q9CZ58;P49722;Q3UWT6	Q8BKE0;Q9CZ58;P49722;Q3UWT6	Proteasome subunit alpha type;Proteasome subunit alpha type-2	Psma2
6.08785	7.11421						6	6	6	16	16	16	47.786	0	355800000	11	3	6	3	6	7.48579	8.51215	n. def.	n. def.	Q3U5U5;Q3U4D1;Q3TF14;P50247;Q8BPI7;Q5M9P0;A2ALT5	Q3U5U5;Q3U4D1;Q3TF14;P50247;Q8BPI7;Q5M9P0	Adenosylhomocysteinase	Ahcy
5.4615	6.4883						6	6	6	16.9	16.9	16.9	55.594	0	90926000	7	2	5	2	5	6.89287	7.91966	n. def.	n. def.	P50516-2;P50516;D3Z1B9;D3YWH3	P50516-2;P50516	V-type proton ATPase catalytic subunit A	Atp6v1a
6.47293	6.90631						10	10	10	33.2	33.2	33.2	37.971	0	209580000	20	6	10	6	10	7.75168	8.18506	n. def.	n. def.	P50580-2;Q05BN2;Q3UMW2;Q3TGU7;P50580	P50580-2;Q05BN2;Q3UMW2;Q3TGU7;P50580	Proliferation-associated protein 2G4	Pa2g4
6.43225	6.57136						5	5	5	28.5	28.5	28.5	23.489	0	90055000	7	4	3	4	3	7.57838	7.71749	n. def.	n. def.	Q4FJQ0;P51150;A0A0N4SVR6;A0A0N4SVG9	Q4FJQ0;P51150;A0A0N4SVR6;A0A0N4SVG9	Ras-related protein Rab-7a	Rab7;Rab7a
4.72073	n. def.						1	1	1	2.3	2.3	2.3	50.898	0.0077849	1419400	0	1	0	1	0	6.1521	n. def.	253	119	Q3UQA3;P51175	Q3UQA3;P51175	Protoporphyrinogen oxidase	Ppox
6.44881	6.82406						12	12	12	23.9	23.9	23.9	79.423	0	369710000	28	10	11	10	11	8.03989	8.41512	n. def.	n. def.	Q3UHW2;Q3TT11;P51660	Q3UHW2;Q3TT11;P51660	Peroxisomal multifunctional enzyme type 2;(3R)-hydroxyacyl-CoA dehydrogenase;Enoyl-CoA hydratase 2	Hsd17b4
n. def.	5.48025						2	2	2	6.5	6.5	6.5	60.159	0	6950000	2	0	2	0	2	n. def.	6.84198	n. def.	n. def.	Q3TSS7;Q3TQK8;P52019	Q3TSS7;Q3TQK8;P52019	Squalene monooxygenase	Sqle
5.40651	6.35757						4	4	4	12.9	12.9	12.9	57.927	0	55728000	5	1	4	1	4	6.74892	7.7	n. def.	n. def.	Q52L97;P52293;A2A600;A2A601;A6PW68;Q641N9	Q52L97;P52293;A2A600;A2A601;A6PW68;Q641N9	Importin subunit alpha;Importin subunit alpha-1	Kpna2
n. def.	5.71306						4	4	4	4.3	4.3	4.3	123.74	0	31506000	4	0	4	0	4	n. def.	7.49839	n. def.	n. def.	Q91VT0;Q8C2N0;P52431;D6RFB8	Q91VT0;Q8C2N0;P52431;D6RFB8	DNA polymerase;DNA polymerase delta catalytic subunit	Pold1
5.4367	5.94207						3	3	3	6.3	6.3	6.3	87.021	0	43642000	4	1	3	1	3	7.01649	7.52186	n. def.	n. def.	P52479;P52479-2	P52479;P52479-2	Ubiquitin carboxyl-terminal hydrolase 10	Usp10
7.40873	7.81543						32	32	5	59.5	59.5	9.4	57.844	0	3003200000	82	24	31	4	5	8.92724	9.33395	n. def.	n. def.	P52480;A0A1L1SU37;A0A1L1SQV8;A0A1L1SSN6;A0A1L1STV8;A0A1L1SUV0;A0A1L1ST52;A0A1L1SVH2;Q3UEH4;E9Q509;Q3UEI4;A7MCU9;P53657;G3X925	P52480;A0A1L1SU37	Pyruvate kinase PKM	Pkm
7.28459	7.67062	+					28	1	1	52.7	2.6	2.6	57.984	1	2247300000	63	20	27	0	1	8.81606	9.20211	n. def.	n. def.	P52480-2	P52480-2	Pyruvate kinase PKM	Pkm
5.59756	n. def.						1	1	1	21.3	21.3	21.3	11.819	0.0084034	1979400	1	1	0	1	0	6.29653	n. def.	n. def.	n. def.	P52927;Q6NSP9	P52927;Q6NSP9	High mobility group protein HMGI-C	Hmga2
5.74195	5.70942						2	2	2	13.7	13.7	13.7	23.546	0	15963000	3	1	1	1	1	6.91805	6.88551	n. def.	n. def.	Q6PDZ3;Q0PD65;P53994;Q8BXY4;Q3TEG7;Q9DB48;Q5U628;Q0PD64;P59279	Q6PDZ3;Q0PD65;P53994;Q8BXY4;Q3TEG7;Q9DB48;Q5U628;Q0PD64;P59279	Ras-related protein Rab-2A;Ras-related protein Rab-2B	Rab2a;Rab2b
6.82016	7.22536						5	5	5	37.1	37.1	37.1	18.742	0	280930000	11	3	5	3	5	7.89934	8.30453	n. def.	n. def.	Q3U935;P53996-2;Q3U5V2;Q3ULK8;P53996-3;Q5QJQ9;P53996;A0A0N4SVS6	Q3U935;P53996-2;Q3U5V2;Q3ULK8;P53996-3;Q5QJQ9;P53996;A0A0N4SVS6	Cellular nucleic acid-binding protein	Cnbp
n. def.	n. def.						2	2	2	5.8	5.8	5.8	50.906	0	0	2	0	2	0	2	n. def.	n. def.	n. def.	n. def.	P54071;A0A0U1RP68;D6RIL6	P54071;A0A0U1RP68;D6RIL6	Isocitrate dehydrogenase [NADP], mitochondrial	Idh2
n. def.	5.53615						4	4	4	3.8	3.8	3.8	150.98	0	24401000	4	0	4	0	4	n. def.	7.38741	n. def.	n. def.	Q8C2N9;P54276;Q9CRH0	Q8C2N9;P54276;Q9CRH0	DNA mismatch repair protein Msh6	Msh6
6.19089	6.58501						10	10	10	29.7	29.7	29.7	47.382	0	134950000	15	4	9	4	9	7.58882	7.98294	n. def.	n. def.	Q569X4;Q3TUN5;Q3TJ97;Q3TFA5;P54775;A0A140LIZ5;Q8BKU2;Q52L53;Q3UBF0	Q569X4;Q3TUN5;Q3TJ97;Q3TFA5;P54775;A0A140LIZ5;Q8BKU2;Q52L53;Q3UBF0	26S protease regulatory subunit 6B	Psmc4
5.90076	6.64359						6	6	6	20.3	20.3	20.3	54.191	0	145520000	9	1	6	1	6	7.34792	8.09075	n. def.	n. def.	P54823	P54823	Probable ATP-dependent RNA helicase DDX6	Ddx6
n. def.	n. def.	+					1	1	1	1.2	1.2	1.2	86.01	1	0	1	1	0	1	0	n. def.	n. def.	254	254	Q5DTR3;P55200-2;P55200	Q5DTR3;P55200-2;P55200	Histone-lysine N-methyltransferase 2A;MLL cleavage product N320;MLL cleavage product C180	Kmt2a
5.57078	6.58021						10	10	10	17.2	17.2	17.2	93.354	0	167040000	14	2	9	2	9	7.17284	8.18227	n. def.	n. def.	Q3U4W8;P56399;D3YYA5;D3Z4K7	Q3U4W8;P56399;D3YYA5	Ubiquitin carboxyl-terminal hydrolase;Ubiquitin carboxyl-terminal hydrolase 5	Usp5
6.269	6.75394						5	5	5	14.2	14.2	14.2	56.3	0	218440000	9	3	5	3	5	7.7314	8.21632	n. def.	n. def.	P56480	P56480	ATP synthase subunit beta, mitochondrial	Atp5b
n. def.	6.90677				OLIG2		5	5	5	16.9	16.9	16.9	45.971	0	153290000	9	0	5	0	5	n. def.	8.18551	n. def.	n. def.	Q91YZ2;Q3UIX8;Q3UGL5;P56546;P56546-2;E9PWQ9;E9Q0T4	Q91YZ2;Q3UIX8;Q3UGL5;P56546;P56546-2;E9PWQ9	C-terminal-binding protein 2	Ctbp2
n. def.	5.29754						1	1	1	9.4	9.4	9.4	17.803	0	1388800	1	0	1	0	1	n. def.	6.14264	n. def.	n. def.	Q99NG1;Q8C7W8;Q8C3T7;Q543U3;P56564	Q99NG1;Q8C7W8;Q8C3T7;Q543U3;P56564	Excitatory amino acid transporter 1	Slc1a3
5.17843	4.87251						1	1	1	1.5	1.5	1.5	75.357	0.0059041	4507300	2	1	1	1	1	6.47945	6.17354	n. def.	n. def.	Q8C7F9;Q8C6H4;Q542E4;P58021;Q3TWB8	Q8C7F9;Q8C6H4;Q542E4;P58021;Q3TWB8	Transmembrane 9 superfamily member 2	Tm9sf2
7.44747	7.8509						38	38	37	55.2	55.2	54.1	95.256	0	4354300000	101	26	34	25	33	9.09093	9.49435	n. def.	n. def.	Q8BMA8;Q3UZ14;Q3UMI7;Q3UDC8;P58252;Q6P9L9;Q8C153;Q3TX47;Q3TK17;Q3TLB1;Q3TJZ1;Q3UBL9;Q3TW58;Q3TWX1;Q3TSK4;Q3TPG2;Q99LT6;Q61509;O89070;O89069	Q8BMA8;Q3UZ14;Q3UMI7;Q3UDC8;P58252;Q6P9L9;Q8C153;Q3TX47;Q3TK17;Q3TLB1;Q3TJZ1;Q3UBL9;Q3TW58;Q3TWX1;Q3TSK4;Q3TPG2	Elongation factor 2	Eef2
5.52216	6.169						3	3	3	13.9	13.9	13.9	28.453	0	27127000	4	1	3	1	3	6.69825	7.34508	n. def.	n. def.	Q05CM5;Q05CH7;Q8BVV6;Q3TKY2;Q3TQR3;P59325;Q05CY6;Q3TT65;Q6PHA6;Q05C65	Q05CM5;Q05CH7;Q8BVV6;Q3TKY2;Q3TQR3;P59325;Q05CY6;Q3TT65;Q6PHA6;Q05C65	Eukaryotic translation initiation factor 5	Eif5
4.5156	n. def.	+					1	1	1	1.3	1.3	1.3	212.12	1	3310700	0	1	0	1	0	6.51992	n. def.	255	1564	Q0V926;P59511	Q0V926;P59511	A disintegrin and metalloproteinase with thrombospondin motifs 20	Adamts20
5.93582	7.20944						3	3	3	16.1	16.1	16.1	19.653	0	153540000	4	1	3	1	3	6.89007	8.16367	n. def.	n. def.	Q9D3C4;Q8BVW6;Q7TPD9;P59999;Q3TX55;E9PWA7	Q9D3C4;Q8BVW6;Q7TPD9;P59999;Q3TX55;E9PWA7	Actin-related protein 2/3 complex subunit 4	Arpc4
6.14498	6.44344				OLIG2		6	6	6	20	20	20	50.213	0	91793000	9	5	5	5	5	7.48739	7.78586	n. def.	n. def.	Q3UJN2;Q3U1C2;P60122;D3YW60	Q3UJN2;Q3U1C2;P60122	RuvB-like 1	Ruvbl1
6.07313	6.60738						5	5	5	16.4	16.4	16.4	49.567	0	141280000	9	3	5	3	5	7.50448	8.03874	n. def.	n. def.	Q9CT23;Q3UIG0;P60229;Q6LCK2	Q9CT23;Q3UIG0;P60229	Eukaryotic translation initiation factor 3 subunit E	Eif3e
7.1547	7.66928						10	10	7	47.8	47.8	36.8	37.497	0	1036600000	21	9	8	6	6	8.38516	8.89973	n. def.	n. def.	P60335	P60335	Poly(rC)-binding protein 1	Pcbp1
n. def.	5.84326						3	3	3	6.1	6.1	6.1	64.378	0	19517000	4	1	3	1	3	n. def.	7.29041	n. def.	n. def.	P60670-2;Q3UE06;Q3UDU9;P60670	P60670-2;Q3UE06;Q3UDU9;P60670	Nuclear protein localization protein 4 homolog	Nploc4
n. def.	6.2836						2	2	2	19	19	19	16.503	0	15370000	1	0	2	0	2	n. def.	7.18667	n. def.	n. def.	Q3UL78;P60766;P60766-1	Q3UL78;P60766;P60766-1	Cell division control protein 42 homolog	Cdc42
6.92139	7.24988						10	10	9	27.9	27.9	24	46.022	0	600820000	21	6	8	5	7	8.28312	8.61162	n. def.	n. def.	Q4FZL1;Q5F2A7;Q3UXC2;Q3TGK7;Q3TFG3;P60843;Q3TLL6;Q3TSJ4;Q78WR5;Q3U8I0;Q8BTU6;Q52KC1;P10630;P10630-2;E9Q561;Q99LR0	Q4FZL1;Q5F2A7;Q3UXC2;Q3TGK7;Q3TFG3;P60843;Q3TLL6;Q3TSJ4;Q78WR5;Q3U8I0;Q8BTU6;Q52KC1;P10630;P10630-2	Eukaryotic initiation factor 4A-I;Eukaryotic initiation factor 4A-II	Eif4a1;Eif4a2
7.97062	8.22321						5	5	5	31.1	31.1	31.1	13.373	0	1303200000	16	4	5	4	5	8.66959	8.92218	n. def.	n. def.	Q5BLK2;P60867	Q5BLK2;P60867	40S ribosomal protein S20	Rps20
6.59117	6.73185						3	2	2	17	11.5	11.5	22.541	0	120820000	5	2	3	1	2	7.7051	7.84579	n. def.	n. def.	Q4FJL0;P61027;Q3U621	Q4FJL0;P61027;Q3U621	Ras-related protein Rab-10	Rab10
5.83221	6.16298						2	2	2	9.3	9.3	9.3	20.9	0.00086207	23485000	1	1	1	1	1	6.8736	7.20439	n. def.	n. def.	P61082;G5E919;Q8R352;F7CDT0;F6WMC0	P61082;G5E919;Q8R352;F7CDT0;F6WMC0	NEDD8-conjugating enzyme Ubc12	Ube2m
6.4228	6.89584						6	6	6	26.4	26.4	26.4	37.322	0	126180000	13	4	6	4	6	7.50199	7.97502	n. def.	n. def.	Q8BMA4;Q5SW83;P61161	Q8BMA4;Q5SW83;P61161	Actin-related protein 2	Actr2
5.9098	6.09114						3	3	3	18.6	18.6	18.6	42.613	0	40919000	6	2	2	2	2	7.21083	7.39217	n. def.	n. def.	P61164;E0CZD4;E0CYB4;Q8R5C5	P61164	Alpha-centractin	Actr1a
n. def.	5.92876						3	3	3	7.4	7.4	7.4	51.609	0	17823000	3	0	3	0	3	n. def.	7.25098	n. def.	n. def.	Q3UK65;P61202;Q3V3N6;P61202-2;A2AQE4	Q3UK65;P61202;Q3V3N6;P61202-2	COP9 signalosome complex subunit 2	Cops2
5.72717	6.75089						6	6	6	12.3	12.3	12.3	64.505	0	178890000	12	4	6	4	6	7.18957	8.21328	n. def.	n. def.	Q6NXX7;Q3UHY8;Q3TJM9;Q3TIU8;P61222	Q6NXX7;Q3UHY8;Q3TJM9;Q3TIU8;P61222	ATP-binding cassette sub-family E member 1	Abce1
7.61806	7.67919						12	12	12	55.2	55.2	55.2	17.258	0	535650000	21	9	9	9	9	8.3962	8.45734	n. def.	n. def.	Q4FZH2;P61255;B1ARA3;Q3U7N1;B1ARA5	Q4FZH2;P61255;B1ARA3;Q3U7N1;B1ARA5	60S ribosomal protein L26	Rpl26
7.7658	8.24606						9	9	9	49.3	49.3	49.3	15.798	0	1407200000	27	7	7	7	7	8.54396	9.0242	n. def.	n. def.	Q5BLJ9;P61358;Q9CSM4;A2A4Q0	Q5BLJ9;P61358;Q9CSM4;A2A4Q0	60S ribosomal protein L27	Rpl27
6.89182	7.346						3	3	3	35.4	35.4	35.4	8.9946	0	119910000	7	3	3	3	3	7.49389	7.94806	n. def.	n. def.	Q5M9N6;Q9CYW3;Q4VAF2;P61514;A0A1D5RL86;Q3TLC1;Q3U8M3	Q5M9N6;Q9CYW3;Q4VAF2;P61514;A0A1D5RL86;Q3TLC1;Q3U8M3	60S ribosomal protein L37a	Rpl37a
6.21506	6.57919						5	5	5	14.7	14.7	14.7	52.234	0	86970000	9	3	4	3	4	7.41918	7.78331	n. def.	n. def.	Q3TJD0;P61620;Q3TTK6;A2ATT9;Q9CYJ6;Q9JLR1	Q3TJD0;P61620	Protein transport protein Sec61 subunit alpha isoform 1	Sec61a1
6.71837	6.98032						2	2	1	10	10	3.9	20.396	0.0008673	147850000	5	2	2	1	1	7.71837	7.98032	n. def.	n. def.	Q14BR4;P61750;Q9DD04;D3YV25;F6UFB9;E9Q2C2;E9Q798;Q8BSL7;Q3U344;P84078;P61205	Q14BR4;P61750;Q9DD04;D3YV25;F6UFB9;E9Q2C2;E9Q798;Q8BSL7;Q3U344;P84078;P61205	ADP-ribosylation factor 4;ADP-ribosylation factor 2;ADP-ribosylation factor 1;ADP-ribosylation factor 3	Arf4;Arf3;Arf2;Arf1
5.82852	6.94922						2	2	2	19.5	19.5	19.5	12.497	0	47852000	5	1	2	1	2	6.52749	7.64819	n. def.	n. def.	P61804	P61804	Dolichyl-diphosphooligosaccharide--protein glycosyltransferase subunit DAD1	Dad1
5.91368	6.1173						2	2	2	17.8	17.8	17.8	18.516	0.0024938	10649000	3	1	2	1	2	6.61265	6.81629	n. def.	n. def.	Q8R3M1;Q542M2;P61924	Q8R3M1;Q542M2;P61924	Coatomer subunit zeta-1	Copz1
n. def.	6.04763						2	2	2	7.3	7.3	7.3	38.813	0	16738000	2	0	2	0	2	n. def.	7.2237	n. def.	n. def.	Q80ZU1;Q3U3H9;P61963	Q80ZU1;Q3U3H9;P61963	DDB1- and CUL4-associated factor 7	Dcaf7
n. def.	6.89701				OLIG2		5	5	5	24	24	24	36.588	0	126220000	8	0	5	0	5	n. def.	8.10113	n. def.	n. def.	P61965;Q3UNQ3;F6Q3W0	P61965;Q3UNQ3;F6Q3W0	WD repeat-containing protein 5	Wdr5
7.2387	7.74422						18	18	18	51.5	51.5	51.5	51.028	0	1747600000	52	12	17	12	17	8.61891	9.12444	n. def.	n. def.	Q5FWJ5;P61979-2;B2M1R6;Q3TUA1;Q3TJ38;P61979;Q3TL71;P61979-3;Q3U9Q3;Q3U6X2;H3BK96;H3BKD0;Q3TG17;H3BLL4;H3BKI8;Q8BT23;H3BJS9;H3BJ43;H3BLP7	Q5FWJ5;P61979-2;B2M1R6;Q3TUA1;Q3TJ38;P61979;Q3TL71;P61979-3;Q3U9Q3;Q3U6X2;H3BK96;H3BKD0;Q3TG17;H3BLL4;H3BKI8	Heterogeneous nuclear ribonucleoprotein K	Hnrnpk
7.57053	7.91941						14	14	14	61.9	61.9	61.9	22.127	0	1202600000	32	10	14	10	14	8.57053	8.91941	n. def.	n. def.	Q4FZE6;P62082;F6SVV1	Q4FZE6;P62082;F6SVV1	40S ribosomal protein S7	Rps7;Gm9493
6.0904	6.98571						9	9	3	33.6	33.6	9.7	37.54	0	196340000	15	5	7	2	3	7.34567	8.241	n. def.	n. def.	P62137;Q3TYF5;Q3U8W0;A0A0J9YUU8	P62137;Q3TYF5;Q3U8W0	Serine/threonine-protein phosphatase PP1-alpha catalytic subunit	Ppp1ca
5.99383	7.01199						9	3	2	34.6	10.4	7	37.186	0	191520000	14	4	7	1	2	7.22427	8.24244	n. def.	n. def.	P62141;A0A0J9YUG2	P62141	Serine/threonine-protein phosphatase PP1-beta catalytic subunit	Ppp1cb
n. def.	6.18503						3	3	3	14.1	14.1	14.1	49.184	0	38281000	4	0	3	0	3	n. def.	7.58298	n. def.	n. def.	Q542I9;P62192	Q542I9;P62192	26S protease regulatory subunit 4	Psmc1
8.0389	8.26084						15	15	15	59.6	59.6	59.6	24.205	0	2625200000	49	13	15	13	15	8.99315	9.21508	n. def.	n. def.	Q497E9;P62242;Q5M9L9;Q3UJU6;Q9CQW4;Q3UA25;Q9CRJ5	Q497E9;P62242;Q5M9L9;Q3UJU6;Q9CQW4;Q3UA25	40S ribosomal protein S8	Rps8
7.34147	7.97931						10	10	10	64.6	64.6	64.6	14.839	0	938390000	24	7	9	7	9	8.24457	8.8824	n. def.	n. def.	Q5M9M4;P62245;F8WJ41;D3Z712;D3YVB4	Q5M9M4;P62245;F8WJ41;D3Z712	40S ribosomal protein S15a	Rps15a
6.71053	7.12571						11	11	9	43.5	43.5	36.5	29.174	0	314370000	18	6	9	4	8	7.94098	8.35618	n. def.	n. def.	Q5SS40;P62259;Q8BPH1;F6WA09;D6REF3	Q5SS40;P62259;Q8BPH1;F6WA09;D6REF3	14-3-3 protein epsilon	Ywhae
7.69504	7.99592						6	6	6	43.4	43.4	43.4	15.835	0	891680000	13	4	4	4	4	8.47319	8.77406	n. def.	n. def.	Q9CWI9;P62267;Q9CZI5;Q9CSN9;Q497E1	Q9CWI9;P62267;Q9CZI5;Q9CSN9;Q497E1	40S ribosomal protein S23	Rps23
7.40317	7.89314						17	17	17	65.8	65.8	65.8	17.718	0	931410000	30	10	15	10	15	8.35742	8.84738	n. def.	n. def.	Q561N5;P62270;F6YVP7;S4R1N6;Q3TW65	Q561N5;P62270;F6YVP7;S4R1N6;Q3TW65	40S ribosomal protein S18	Rps18;Gm10260
7.40292	7.53855						1	1	1	19.6	19.6	19.6	6.6767	0	119690000	4	1	1	1	1	7.70394	7.83958	n. def.	n. def.	P62274	P62274	40S ribosomal protein S29	Rps29
7.80551	8.03387						15	15	15	64.6	64.6	64.6	18.431	0	1720100000	30	14	13	14	13	8.80551	9.03387	n. def.	n. def.	Q3UC02;P62281;Q9DB79;A0A1B0GRR3;A0A1B0GSE8;Q9D0P6;Q9CW75	Q3UC02;P62281;Q9DB79;A0A1B0GRR3;A0A1B0GSE8;Q9D0P6	40S ribosomal protein S11	Rps11
7.49665	7.88779						11	11	11	52.3	52.3	52.3	17.222	0	977500000	26	9	11	9	11	8.4509	8.84203	n. def.	n. def.	Q5BLJ7;P62301;Q921R2;A0A0U1RQ71	Q5BLJ7;P62301;Q921R2	40S ribosomal protein S13	Rps13
7.21096	7.53578						3	3	3	37.8	37.8	37.8	13.281	0	202370000	11	2	3	2	3	7.81301	8.13783	n. def.	n. def.	P62315	P62315	Small nuclear ribonucleoprotein Sm D1	Snrpd1
6.7211	7.28194						6	6	6	64.4	64.4	64.4	13.527	0	170810000	9	3	5	3	5	7.5662	8.12704	n. def.	n. def.	Q14AF6;P62317;D3Z5N9	Q14AF6;P62317;D3Z5N9	Small nuclear ribonucleoprotein Sm D2	Snrpd2;Gm5449
7.39907	7.72157						4	4	4	33.3	33.3	33.3	13.985	0	466410000	14	3	4	3	4	8.17722	8.49971	n. def.	n. def.	Q91VM2;P62320;A0A1W2P7K5	Q91VM2;P62320	Small nuclear ribonucleoprotein Sm D3	Snrpd3
5.49654	5.66224						2	2	2	8.9	8.9	8.9	33.053	0	15463000	4	1	2	1	2	6.79757	6.96327	n. def.	n. def.	Q8QZS9;Q14AQ1;P62334	Q8QZS9;Q14AQ1;P62334	26S protease regulatory subunit 10B	Psmc6
7.73941	8.08005	+					7	1	1	15.3	1.7	1.7	50.454	1	3677500000	26	5	7	0	1	9.06164	9.40228	n. def.	n. def.	P62631	P62631	Elongation factor 1-alpha 2	Eef1a2
n. def.	5.71266						1	1	1	9.9	9.9	9.9	13.827	0.0024732	3612100	2	0	1	0	1	n. def.	6.55776	n. def.	n. def.	Q65Z92;Q3TMG7;Q3TDV0;P62700	Q65Z92;Q3TMG7;Q3TDV0;P62700	Protein yippee-like 5	Ypel5
7.6308	7.90698						16	16	16	53.5	53.5	53.5	27.504	0	1975300000	43	14	14	14	14	8.83492	9.11109	n. def.	n. def.	Q545F8;Q545X8;Q3UXQ6;P62702;Q3V1Z5;V9GWY0	Q545F8;Q545X8;Q3UXQ6;P62702;Q3V1Z5;V9GWY0	40S ribosomal protein S4, X isoform	Rps4x;Rps4y2
n. def.	6.61816						2	2	2	12.9	12.9	12.9	15.921	0	20755000	2	0	2	0	2	n. def.	7.31712	n. def.	n. def.	Q7TT10;Q3UJ76;P62743;A0A0U1RQ06	Q7TT10;Q3UJ76;P62743;A0A0U1RQ06	AP-2 complex subunit sigma	Ap2s1
7.52684	8.59581						9	9	9	34.9	34.9	34.9	28.667	0	3423400000	22	5	7	5	7	8.42993	9.4989	n. def.	n. def.	Q8BT09;Q5BLK1;P62754;Q3TL53	Q8BT09;Q5BLK1;P62754;Q3TL53	40S ribosomal protein S6	Rps6
5.96236	5.77741						2	2	2	22.9	22.9	22.9	12.861	0	9095800	2	1	1	1	1	6.74051	6.55557	n. def.	n. def.	P62774;A0A0J9YV46	P62774;A0A0J9YV46	Myotrophin	Mtpn
7.17777	7.80302						10	10	10	35.2	35.2	35.2	24.351	0	864530000	19	6	10	6	10	8.21917	8.84441	n. def.	n. def.	Q3ULW0;P62827;Q14AA6;Q61820;A6H622	Q3ULW0;P62827;Q14AA6	GTP-binding nuclear protein Ran	Ran;1700009N14Rik
7.29307	7.8946						6	6	6	35	35	35	14.865	0	882800000	16	3	6	3	6	8.24731	8.84885	n. def.	n. def.	P62830;A2A6F8	P62830	60S ribosomal protein L23	Rpl23
7.22357	7.40083						3	3	3	30	30	30	15.069	0	251400000	7	3	2	3	2	8.00173	8.17898	n. def.	n. def.	P62849-2;P62849-3;Q9D7P1;Q9CY61;Q5M9M7;Q3TIF8;P62849;Q9CQK2;Q9DCA4	P62849-2;P62849-3;Q9D7P1;Q9CY61;Q5M9M7;Q3TIF8;P62849;Q9CQK2;Q9DCA4	40S ribosomal protein S24	Rps24
7.64612	7.92703						4	4	4	37.4	37.4	37.4	13.015	0	644020000	11	3	4	3	4	8.34508	8.626	n. def.	n. def.	Q497N1;P62855	Q497N1;P62855	40S ribosomal protein S26	Rps26
7.66666	7.38202						2	2	2	18.6	18.6	18.6	6.6478	0.0008881	141030000	3	2	1	2	1	7.96769	7.68306	n. def.	n. def.	P62862;Q642K5;Q3THB2;Q920W8;Q91V99	P62862;Q642K5;Q3THB2;Q920W8;Q91V99	40S ribosomal protein S30	Fau
6.1967	7.2136						3	3	3	30.6	30.6	30.6	12.274	0	53778000	5	1	3	1	3	6.67381	7.69073	n. def.	n. def.	P62878	P62878	E3 ubiquitin-protein ligase RBX1;E3 ubiquitin-protein ligase RBX1, N-terminally processed	Rbx1
7.77196	8.05572						7	7	7	66.1	66.1	66.1	12.784	0	1037100000	22	5	6	5	6	8.55011	8.83388	n. def.	n. def.	Q58DZ3;P62889;Q497D7;Q5PR15	Q58DZ3;P62889;Q497D7;Q5PR15	60S ribosomal protein L30	Rpl30
7.68486	7.90019						1	1	1	19.6	19.6	19.6	6.4066	0.0025021	127870000	2	1	1	1	1	7.68486	7.90019	n. def.	n. def.	Q505A8;P62892	Q505A8;P62892	60S ribosomal protein L39	Rpl39
7.78365	7.21317						6	6	6	50.4	50.4	50.4	14.411	0	539710000	12	6	3	6	3	8.62876	8.05827	n. def.	n. def.	Q9CY93;Q5M9K9;P62900;A0A0A6YX26;A0A0A6YXL3;Q58DZ1	Q9CY93;Q5M9K9;P62900;A0A0A6YX26;A0A0A6YXL3	60S ribosomal protein L31	Rpl31
7.51536	7.85999						18	18	18	62.1	62.1	62.1	26.674	0	1998900000	36	13	17	13	17	8.79411	9.13874	n. def.	n. def.	Q5YLW3;P62908;Q9D0A2;Q3UCL7;Q3UK56;Q9CZP6;D3YV43;O89068;A0A140LI77	Q5YLW3;P62908;Q9D0A2;Q3UCL7;Q3UK56;Q9CZP6;D3YV43;O89068;A0A140LI77	40S ribosomal protein S3	Rps3
7.38167	7.66362						6	6	6	34.8	34.8	34.8	15.874	0	491200000	18	5	6	5	6	8.22675	8.50872	n. def.	n. def.	Q5PR09;P62911	Q5PR09;P62911	60S ribosomal protein L32	Rpl32
n. def.	5.76355						1	1	1	5.1	5.1	5.1	34.8	0.0059746	10443000	1	0	1	0	1	n. def.	7.01883	n. def.	n. def.	Q3UZJ3;Q3UNY0;Q3ULN2;P62915	Q3UZJ3;Q3UNY0;Q3ULN2;P62915	Transcription initiation factor IIB	Gtf2b
7.78418	7.9778						12	12	12	51	51	51	28.066	0	1558600000	27	9	10	9	10	8.78417	8.9778	n. def.	n. def.	Q3UJS0;P62918;Q3THC7;Q9Z237	Q3UJS0;P62918;Q3THC7;Q9Z237	60S ribosomal protein L8	Rpl8
7.02115	7.62343						9	9	4	52.2	52.2	25.8	35.7	0	735230000	17	4	8	1	4	8.16726	8.76955	n. def.	n. def.	Q60951;Q3UBT1;P62960;Q71V06;Q810K5;A2BGG7;Q8BRJ5;Q497N3;Q9Z2C8-2;Q9Z2C8	Q60951;Q3UBT1;P62960;Q71V06;Q810K5;A2BGG7	Nuclease-sensitive element-binding protein 1	Ybx1
6.25088	7.14476						3	3	3	28.6	28.6	28.6	11.82	0	94425000	5	1	3	1	3	7.02902	7.9229	n. def.	n. def.	Q5SX49;Q8CEH8;Q5SX50;P62962;Q3U7V7;CON__P02584	Q5SX49;Q8CEH8;Q5SX50;P62962;Q3U7V7	Profilin;Profilin-1	Pfn1
8.22729	8.617						9	9	9	51.9	51.9	51.9	17.951	0	3496700000	41	8	9	8	9	9.00544	9.39515	n. def.	n. def.	Q642L7;P62983;A5JUZ1;A0A0A6YW67;E9Q9J0;Q5M9K3;P62984;Q8C2K3;E9Q4P0;E9Q5F6;Q922B0;E9QNP0;Q5SX22;Q3TH47;Q78XY9;P0CG49;Q8R0Z9;Q922Z8;Q8VC46;P0CG50;B0LAC2;D3YYZ2;Q3TWD1	Q642L7;P62983;A5JUZ1;A0A0A6YW67;E9Q9J0;Q5M9K3;P62984;Q8C2K3;E9Q4P0;E9Q5F6;Q922B0;E9QNP0;Q5SX22;Q3TH47;Q78XY9;P0CG49;Q8R0Z9;Q922Z8;Q8VC46;P0CG50;B0LAC2	Ubiquitin-40S ribosomal protein S27a;Ubiquitin;40S ribosomal protein S27a;Ubiquitin-60S ribosomal protein L40;Ubiquitin;60S ribosomal protein L40;Polyubiquitin-B;Ubiquitin;Polyubiquitin-C;Ubiquitin;Ubiquitin-related 1;Ubiquitin-related 2	Rps27a;Ubc;Uba52;Gm1821;Kxd1;Ubb
5.59589	6.49441						5	5	5	19.9	19.9	19.9	44.487	0	77354000	10	2	5	2	5	6.93831	7.83682	n. def.	n. def.	Q3UHM0;P63005-2;Q5SW18;Q3UH92;Q3UGR6;Q3TJG1;Q3TIK0;P63005;Q5SW16;Q3TUH5	Q3UHM0;P63005-2;Q5SW18;Q3UH92;Q3UGR6;Q3TJG1;Q3TIK0;P63005	Platelet-activating factor acetylhydrolase IB subunit alpha	Pafah1b1
7.5636	7.94624						24	24	22	39.5	39.5	37.8	70.898	0	4123900000	61	18	22	16	20	9.0821	9.46476	n. def.	n. def.	Q3UBA6;Q3TQ13;Q3TH56;Q3TEK2;P63017;Q504P4;Q3U9L2;Q3TF16;Q3TRH3;Q3ULM1;Q3TZJ3;Q3UDS0;Q3TB63;Q3KQJ4;Q3TH04;Q3UXU1;D3Z5E2;P17156;B7U582;Q3UBR0;P16627;B2CSK2;A1L347;Q9QZ38;Q9R2A1;Q61696;Q3TU85;Q3TAI8;A1E2B8;P17879;O88687;Q9QWU1	Q3UBA6;Q3TQ13;Q3TH56;Q3TEK2;P63017;Q504P4;Q3U9L2;Q3TF16;Q3TRH3;Q3ULM1;Q3TZJ3;Q3UDS0;Q3TB63;Q3KQJ4;Q3TH04	Heat shock cognate 71 kDa protein	Hspa8
6.05169	7.02329						9	9	9	30.7	30.7	30.7	44.868	0	245240000	17	6	9	6	9	7.37392	8.34553	n. def.	n. def.	Q5NTY0;Q3TK61;P63037;B1AXY1;B1AXY0;B1AXX9	Q5NTY0;Q3TK61;P63037;B1AXY1	DnaJ homolog subfamily A member 1	Dnaja1
5.74345	6.00372						3	3	3	9.6	9.6	9.6	60.955	0	51563000	8	2	3	2	3	7.26198	7.52224	n. def.	n. def.	P63038;D3Z7J9;D3Z2F2	P63038;D3Z7J9;D3Z2F2	60 kDa heat shock protein, mitochondrial	Hspd1
5.68516	6.69286						8	8	6	26.5	26.5	20.7	41.275	0	119120000	11	2	8	2	6	7.02759	8.03527	n. def.	n. def.	P63085;Q3UF82;O35558;Q922X7;F6VEI7;Q3U2H3;A0A0U1RPZ0;D3Z6D8	P63085;Q3UF82;O35558	Mitogen-activated protein kinase 1	Mapk1
5.7741	7.0106						8	1	1	32.2	4.3	4.3	36.983	0.0032547	173470000	11	3	6	0	1	6.97822	8.21474	n. def.	n. def.	Q6ZWM8;Q3U7K1;P63087;P63087-2;A0A0G2JGC1;A0A0G2JFF1	Q6ZWM8;Q3U7K1;P63087;P63087-2;A0A0G2JGC1;A0A0G2JFF1	Serine/threonine-protein phosphatase;Serine/threonine-protein phosphatase PP1-gamma catalytic subunit	Ppp1cc
7.08041	7.29791						9	7	7	39.2	31.8	31.8	27.771	0	446470000	20	8	8	6	7	8.22652	8.44404	n. def.	n. def.	P63101;D3YXN6;Q3UA58;Q8BWN0;D3YXF4;D3YW45	P63101	14-3-3 protein zeta/delta	Ywhaz
6.97458	7.58058						4	4	4	34.8	34.8	34.8	15.524	0	237510000	10	2	4	2	4	7.67355	8.27955	n. def.	n. def.	Q5M9L7;Q3TK12;P63276;Q8BT90	Q5M9L7;Q3TK12;P63276;Q8BT90	40S ribosomal protein S17	Rps17
7.16262	7.52906						4	4	4	24.2	24.2	24.2	18.916	0	386820000	15	4	4	4	4	8.06569	8.43215	n. def.	n. def.	Q5M9K7;Q3U9P0;P63325;Q3UW83	Q5M9K7;Q3U9P0;P63325;Q3UW83	40S ribosomal protein S10	Rps10
5.78186	6.68783						4	4	4	20.4	20.4	20.4	35.608	0	87657000	4	1	4	1	4	6.98598	7.89196	n. def.	n. def.	P63330;Q8VED4;Q8BN07;P62715	P63330;Q8VED4;Q8BN07;P62715	Serine/threonine-protein phosphatase 2A catalytic subunit alpha isoform;Serine/threonine-protein phosphatase;Serine/threonine-protein phosphatase 2A catalytic subunit beta isoform	Ppp2ca;Ppp2cb
5.59777	5.27566						3	3	3	15.1	15.1	15.1	29.82	0	10525000	5	2	2	2	2	6.85304	6.53092	n. def.	n. def.	P67778;Q5SQG5;Q3TV00;Q3V2K0	P67778;Q5SQG5;Q3TV00;Q3V2K0	Prohibitin	Phb;1700071K01Rik
7.78854	8.10819						6	6	6	50.8	50.8	50.8	14.759	0	758980000	18	5	6	5	6	8.3906	8.71026	n. def.	n. def.	Q4VAG4;P67984	Q4VAG4;P67984	60S ribosomal protein L22	Rpl22
n. def.	6.51882						2	2	2	24	24	24	17.861	0	23116000	3	0	2	0	2	n. def.	7.36391	n. def.	n. def.	Q561N4;P68037;D3YZS3;Q3TIH9	Q561N4;P68037;D3YZS3;Q3TIH9	Ubiquitin-conjugating enzyme E2 L3	Ube2l3
7.49227	7.92402						18	18	18	72.6	72.6	72.6	35.076	0	2300300000	43	15	14	15	14	8.7933	9.22505	n. def.	n. def.	P68040	P68040	Guanine nucleotide-binding protein subunit beta-2-like 1	Gnb2l1
5.25208	6.21437						4	4	4	14.5	14.5	14.5	39.449	0	29069000	4	1	3	1	3	6.45618	7.41848	n. def.	n. def.	P68181-2;P68181-3;P68181;P68181-4;P05132-2;P05132;A0A0G2JFT9;H6TMF6;H6TMF5;Q8C4J3;Q8CBP8;J9JDU9	P68181-2;P68181-3;P68181;P68181-4;P05132-2;P05132;A0A0G2JFT9;H6TMF6;H6TMF5	cAMP-dependent protein kinase catalytic subunit beta;cAMP-dependent protein kinase catalytic subunit alpha	Prkacb;Prkaca
7.91062	8.50529						13	13	2	38.8	38.8	3.1	50.135	0	8431500000	57	11	13	2	2	9.23284	9.8275	n. def.	n. def.	P68369;Q52L87;Q3TIZ0;P68373;Q5FW91;P05214;Q9D9Y2;Q9JJZ2	P68369;Q52L87;Q3TIZ0;P68373;Q5FW91;P05214;Q9D9Y2;Q9JJZ2	Tubulin alpha-1A chain;Tubulin alpha-1C chain;Tubulin alpha-3 chain;Tubulin alpha-8 chain	Tuba1a;Tuba1c;Tuba3a;Tuba3b;Tuba8
7.7978	8.20496						29	29	1	65.2	65.2	2.7	49.83	0	4461600000	94	21	28	1	1	9.09882	9.50598	n. def.	n. def.	P68372;Q9CVR0	P68372;Q9CVR0	Tubulin beta-4B chain	Tubb4b
n. def.	6.21144						3	3	3	7.6	7.6	7.6	76.75	0	56952000	3	0	3	0	3	n. def.	7.75551	n. def.	n. def.	P68404;P68404-2;Q3TQ39;Q2NKI4;Q4VA93;P20444;Q3UN66;P63318	P68404;P68404-2	Protein kinase C beta type	Prkcb
6.73528	6.6195						7	4	4	25.2	17.1	17.1	28.211	0	153600000	11	5	6	2	4	7.93939	7.82362	n. def.	n. def.	P68510;Q8BJH3	P68510	14-3-3 protein eta	Ywhah
5.4309	6.51215						7	7	7	10.4	10.4	10.4	97.112	0	140870000	12	3	7	3	7	7.03294	8.11421	n. def.	n. def.	Q3TFE8;Q7TSZ6;P70168;Q3UHW8	Q3TFE8;Q7TSZ6;P70168;Q3UHW8	Importin subunit beta-1	Kpnb1
5.58234	5.1442						3	3	3	10.4	10.4	10.4	38.265	0	10432000	5	1	3	1	3	6.88337	6.44523	n. def.	n. def.	P70199;Q3U6V5;Q8BWY3;Q3TL10;Q3TF02;Q3TDF8	P70199;Q3U6V5;Q8BWY3;Q3TL10;Q3TF02;Q3TDF8	Eukaryotic peptide chain release factor subunit 1	Etf1
n. def.	7.25137				TCF4		9	9	7	38.1	38.1	32.7	48.853	0	338940000	13	0	9	0	7	n. def.	8.53012	n. def.	n. def.	P70257-1;P70257;D3YZ00;P70257-2;E9PUH7;Q5CZY4;Q3TYK3	P70257-1;P70257;D3YZ00;P70257-2;E9PUH7;Q5CZY4;Q3TYK3	Nuclear factor 1 X-type;Nuclear factor 1	Nfix
6.05937	7.07664						3	3	3	40.6	40.6	40.6	20.83	0	130760000	6	1	3	1	3	7.05937	8.07664	n. def.	n. def.	Q5EBQ2;Q3TGC5;P70296;D6RHS6;D3Z1V4	Q5EBQ2;Q3TGC5;P70296;D6RHS6;D3Z1V4	Phosphatidylethanolamine-binding protein 1;Hippocampal cholinergic neurostimulating peptide	Pebp1
n. def.	6.84855						2	2	2	14	14	14	28.008	0	28223000	2	0	2	0	2	n. def.	7.4506	n. def.	n. def.	P70300;Q62347;Q543W0;Q01147-2;Q547S9;Q01147;D3Z7P7;D3Z326;Q78Z98;F6VJ22;D3Z6A5;P27699-11;F6QWT6;F6U9F5;P27699-10;P27699-2;Q9CWS2;Q922R4;P81269;P27699-8;F6Q346;P27699-7;F6W4F5;E9PWV9;P27699-6;Q61442;A0A087WRI6;D3Z7M6;F6QKL8;D3Z2U7;P27699-5	P70300;Q62347;Q543W0;Q01147-2;Q547S9;Q01147;D3Z7P7;D3Z326;Q78Z98;F6VJ22;D3Z6A5;P27699-11;F6QWT6;F6U9F5;P27699-10;P27699-2;Q9CWS2;Q922R4;P81269;P27699-8;F6Q346;P27699-7;F6W4F5;E9PWV9;P27699-6;Q61442;A0A087WRI6;D3Z7M6;F6QKL8;D3Z2U7;P27699-5	Cyclic AMP-responsive element-binding protein 1;Cyclic AMP-dependent transcription factor ATF-1	Creb1;Crem;Atf1
7.03298	7.48337						7	3	3	22.9	10.5	10.5	49.279	0	700790000	23	5	7	1	3	8.26342	8.71382	n. def.	n. def.	P70333;Q3UR26	P70333	Heterogeneous nuclear ribonucleoprotein H2;Heterogeneous nuclear ribonucleoprotein H2, N-terminally processed	Hnrnph2
6.41019	6.30889						7	7	7	30.1	30.1	30.1	36.153	0	73727000	10	6	2	6	2	7.61431	7.513	n. def.	n. def.	Q8BW03;Q8BM84;P70372;Q8BTQ1;Q3TT05;Q8BVF8;Q3UFF9	Q8BW03;Q8BM84;P70372;Q8BTQ1;Q3TT05;Q8BVF8;Q3UFF9	ELAV-like protein 1	Elavl1
4.45059	5.158						4	4	4	2.1	2.1	2.1	290.21	0	21169000	4	1	3	1	3	6.54049	7.24792	n. def.	n. def.	Q4FE56;P70398;G3UZS3;Q8BS89	Q4FE56;P70398	Ubiquitin carboxyl-terminal hydrolase;Probable ubiquitin carboxyl-terminal hydrolase FAF-X	Usp9x
n. def.	4.90269						1	1	1	3.5	3.5	3.5	74.265	0.0083857	2397800	1	0	1	0	1	n. def.	6.37981	n. def.	n. def.	Q3V1P7;Q8C0U1;P70399-6;P70399-5;P70399	Q3V1P7;Q8C0U1;P70399-6;P70399-5;P70399	Tumor suppressor p53-binding protein 1	Trp53bp1;Tp53bp1
5.78104	6.28071						5	5	5	2.7	2.7	2.7	220.5	0	256280000	10	4	4	4	4	7.78964	8.28932	n. def.	n. def.	P70670;Q3UK68;Q60817	P70670;Q3UK68;Q60817	Nascent polypeptide-associated complex subunit alpha, muscle-specific form;Nascent polypeptide-associated complex subunit alpha	Naca
6.17035	6.42596						2	2	2	6.9	6.9	6.9	31.474	0	62204000	6	2	2	2	2	7.34643	7.60205	n. def.	n. def.	P70677;A0A1B0GRX1;Q8BNT4	P70677;A0A1B0GRX1;Q8BNT4	Caspase-3;Caspase-3 subunit p17;Caspase-3 subunit p12	Casp3
6.69867	6.94712						14	14	14	41	41	41	59.652	0	401650000	24	9	11	9	11	8.16107	8.40951	n. def.	n. def.	Q3TIJ7;Q3TET0;P80313;Q3UDB1;Q3UIJ0;Q8C5Q5;Q3TJN2;Q3THH8;A0A0N4SV00;A0A0N4SUI8;A0A0N4SV22	Q3TIJ7;Q3TET0;P80313;Q3UDB1;Q3UIJ0;Q8C5Q5;Q3TJN2;Q3THH8;A0A0N4SV00	T-complex protein 1 subunit eta	Cct7
6.53079	7.08743						14	14	14	44.7	44.7	44.7	57.477	0	499980000	29	9	14	9	14	8.03595	8.59257	n. def.	n. def.	Q542X7;P80314;Q9JJD8;A0A1W2P7B7;A0A1W2P8B6;A0A1W2P6Q3	Q542X7;P80314;Q9JJD8	T-complex protein 1 subunit beta	Cct2
6.44001	6.89647						12	12	12	27.5	27.5	27.5	58.066	0	350900000	29	9	10	9	10	7.95853	8.41497	n. def.	n. def.	Q564F4;Q3UJZ8;P80315;G5E839;Q3TII0;G3UYW5;G3UXF3;G3UXG2	Q564F4;Q3UJZ8;P80315;G5E839;Q3TII0	T-complex protein 1 subunit delta	Cct4
6.52367	6.97265						10	10	10	23.7	23.7	23.7	59.623	0	381870000	22	9	8	9	8	8.00078	8.44977	n. def.	n. def.	P80316;E0CZA1	P80316	T-complex protein 1 subunit epsilon	Cct5
6.506	7.08955						11	11	11	28.8	28.8	28.8	58.076	0	402920000	16	4	10	4	10	7.92098	8.50454	n. def.	n. def.	Q52KG9;Q3TW97;Q3TIX8;Q3TI05;P80317;Q3TI62;Q8VEI1;Q61390;Q497N0	Q52KG9;Q3TW97;Q3TIX8;Q3TI05;P80317;Q3TI62;Q8VEI1	T-complex protein 1 subunit zeta	Cct6a
6.62878	7.28246						18	18	18	40.9	40.9	40.9	58.278	0	702490000	32	7	17	7	17	8.10588	8.75958	n. def.	n. def.	Q3U0I3;Q3U4U6;P80318;Q3UJP4;E9Q133;Q3TBM6;F6Q609;Q9R1U1	Q3U0I3;Q3U4U6;P80318;Q3UJP4;E9Q133;Q3TBM6	T-complex protein 1 subunit gamma	Cct3
5.98768	6.42873						2	2	2	26.4	26.4	26.4	12.405	0	29246000	3	1	2	1	2	6.89076	7.33181	n. def.	n. def.	P83870	P83870	PHD finger-like domain-containing protein 5A	Phf5a
7.19579	6.60531						3	3	3	17.9	17.9	17.9	12.441	0	78905000	5	3	2	3	2	7.79786	7.20737	n. def.	n. def.	Q5M9P1;P83882	Q5M9P1;P83882	60S ribosomal protein L36a	Rpl36a
6.65783	6.9179						2	1	1	11.7	5.6	5.6	20.529	0.0070872	141080000	3	1	2	0	1	7.69922	7.95929	n. def.	n. def.	P84084	P84084	ADP-ribosylation factor 5	Arf5
5.35995	6.53556						7	7	7	22.4	22.4	22.4	49.389	0	95190000	10	3	5	3	5	6.77493	7.95054	n. def.	n. def.	Q3TWV4;Q5FWI9;P84091;Q6A0C9;Q3TH69;Q3UCW9	Q3TWV4;Q5FWI9;P84091;Q6A0C9;Q3TH69	AP-2 complex subunit mu	Ap2m1
6.75639	7.24824						6	6	6	53.2	53.2	53.2	14.203	0	187340000	13	4	6	4	6	7.65948	8.15134	n. def.	n. def.	Q3U781;P84104-2;Q9D6W4;P84104;A2A4X6	Q3U781;P84104-2;Q9D6W4;P84104;A2A4X6	Serine/arginine-rich splicing factor 3	Srsf3;Gm12355
5.95658	6.60819						12	12	12	18.5	18.5	18.5	101.93	0	218320000	21	6	11	6	11	7.60004	8.25164	n. def.	n. def.	Q3UK39;P97310;Q3UJN1	Q3UK39;P97310;Q3UJN1	DNA replication licensing factor MCM2	Mcm2
6.12346	6.65494						11	11	11	22.2	22.2	22.2	89.783	0	280640000	20	5	11	5	11	7.8047	8.33618	n. def.	n. def.	Q3ULG5;Q542I2;P97311;Q3UC10;Q8C5L1	Q3ULG5;Q542I2;P97311;Q3UC10	DNA replication licensing factor MCM6	Mcm6
n. def.	5.89277						1	1	1	8.8	8.8	8.8	20.583	0	9374500	1	0	1	0	1	n. def.	6.97195	n. def.	n. def.	Q4FJX4;P97315	Q4FJX4;P97315	Cysteine and glycine-rich protein 1	Csrp1
7.65482	7.82963						15	15	15	51.5	51.5	51.5	29.885	0	1916200000	42	14	12	14	12	8.88528	9.06009	n. def.	n. def.	Q9D1S3;Q564F3;P97351;Q3UAC2;Q3U5P8;Q3UJU5	Q9D1S3;Q564F3;P97351;Q3UAC2;Q3U5P8;Q3UJU5	40S ribosomal protein S3a	Rps3a1;Rps3a
5.5949	6.41						3	3	3	17.9	17.9	17.9	25.801	0	35566000	3	1	3	1	3	6.67408	7.48917	n. def.	n. def.	Q3V3M3;Q78P92;P97376	Q3V3M3;Q78P92;P97376	Protein FRG1	Frg1
6.10195	6.87667				TCF4		5	3	3	20.5	14.1	14.1	33.887	0	167060000	7	1	5	0	3	7.3807	8.15543	n. def.	n. def.	Q3U6X7;P97377-2;Q3UGB9;Q3U307;P97377;Q80YP0;Q80YP0-2	Q3U6X7;P97377-2;Q3UGB9;Q3U307;P97377;Q80YP0	Cyclin-dependent kinase 2;Cyclin-dependent kinase 3	Cdk2;Cdk3
n. def.	n. def.						1	1	1	2.9	2.9	2.9	50.647	0	0	1	1	0	1	0	n. def.	n. def.	n. def.	n. def.	Q3U931;Q542W3;P97379-2;Q3U541;P97379;Q3U6B1	Q3U931;Q542W3;P97379-2;Q3U541;P97379;Q3U6B1	Ras GTPase-activating protein-binding protein 2	G3bp2
4.97258	5.77747						3	3	3	6.4	6.4	6.4	83.124	0	24946000	5	1	3	1	3	6.52888	7.33377	n. def.	n. def.	Q3TIJ5;Q3TJZ5;P97452;Q3THV0	Q3TIJ5;Q3TJZ5;P97452;Q3THV0	Ribosome biogenesis protein BOP1	Bop1
5.58501	n. def.	+					1	1	1	0.5	0.5	0.5	291.41	1	47305000	1	1	0	1	0	7.67491	n. def.	262	545	Q5XKB2;P97499	Q5XKB2;P97499	Telomerase protein component 1	Tep1
n. def.	5.81029						2	2	2	7.5	7.5	7.5	50.052	0	16152000	2	0	2	0	2	n. def.	7.20823	n. def.	n. def.	P97807-2;P97807;H3BKG7	P97807-2;P97807;H3BKG7	Fumarate hydratase, mitochondrial	Fh;Fh1
5.80988	5.91701						2	2	2	4.1	4.1	4.1	51.828	0	32374000	4	2	1	2	1	7.15232	7.25943	n. def.	n. def.	P97855;Q571F9;Q3UR88	P97855;Q571F9;Q3UR88	Ras GTPase-activating protein-binding protein 1	G3bp1
n. def.	6.67673						1	1	1	1.7	1.7	1.7	84.082	0.005287	204270000	0	0	1	0	1	n. def.	8.3102	n. def.	n. def.	Q3TN53;Q6PB43;Q8VHD0;P97929	Q3TN53;Q6PB43;Q8VHD0;P97929	Breast cancer type 2 susceptibility protein homolog	Brca2
n. def.	5.07914	+					1	1	1	3.9	3.9	3.9	40.908	1	2399800	1	0	1	0	1	n. def.	6.38018	264	206	P97946	P97946	Vascular endothelial growth factor D	Figf
5.17389	n. def.						1	1	1	0.8	0.8	0.8	129.42	0.0096485	8058800	0	1	0	1	0	6.90627	n. def.	n. def.	n. def.	P98200	P98200	Probable phospholipid-transporting ATPase IB	Atp8a2
7.81504	8.20871						28	4	3	64.4	15.5	12.2	49.67	0	4540300000	89	21	27	3	3	9.11608	9.50974	n. def.	n. def.	P99024;Q9DCR1;Q80ZV2;D5MR34	P99024;Q9DCR1	Tubulin beta-5 chain	Tubb5;Tubb4b
n. def.	5.80966				OLIG2		2	2	2	7	7	7	32.991	0	9677200	1	0	2	0	2	n. def.	6.98575	n. def.	n. def.	Q8C6B5;Q00899	Q8C6B5;Q00899	Transcriptional repressor protein YY1	Yy1
5.62603	5.80077						2	2	2	1.9	1.9	1.9	84.939	0	35862000	6	2	2	2	2	7.15752	7.33226	n. def.	n. def.	Q00PI9	Q00PI9	Heterogeneous nuclear ribonucleoprotein U-like protein 2	Hnrnpul2
5.5079	6.61279						18	18	12	15.4	15.4	11.4	172.79	0	349350000	26	6	17	3	11	7.40552	8.51041	n. def.	n. def.	Q01320;Q8CCE5;Q6PET9;Q3TTG4;Q3UUS6	Q01320;Q8CCE5	DNA topoisomerase 2-alpha	Top2a
6.44511	6.93324						20	20	20	31	31	31	89.321	0	511280000	37	14	16	14	16	8.09833	8.58645	n. def.	n. def.	Q01853;Q8BNF8	Q01853;Q8BNF8	Transitional endoplasmic reticulum ATPase	Vcp
n. def.	5.74612						1	1	1	3.6	3.6	3.6	28.596	0.0096552	7802700	1	0	1	0	1	n. def.	6.89224	n. def.	n. def.	Q8CAC4;Q3THG5;Q03147	Q8CAC4;Q3THG5;Q03147	Cyclin-dependent kinase 7	Cdk7
7.8881	8.37956						19	19	19	67.5	67.5	67.5	42.713	0	5704600000	83	16	18	16	18	9.14336	9.63482	n. def.	n. def.	Q04447	Q04447	Creatine kinase B-type	Ckb
n. def.	6.02189						3	3	3	4.2	4.2	4.2	95.786	0	39966000	2	0	3	0	3	n. def.	7.60169	n. def.	n. def.	Q04692-2;Q04692	Q04692-2;Q04692	SWI/SNF-related matrix-associated actin-dependent regulator of chromatin subfamily A containing DEAD/H box 1	Smarcad1
6.25166	6.49231						10	10	10	17.3	17.3	17.3	90.875	0	185890000	23	7	10	7	10	7.83145	8.0721	n. def.	n. def.	Q04750;Q3ULF5;Q3TSR2;Q3TPX7;Q3TUS4;Q569Q5;Q6LBJ1	Q04750	DNA topoisomerase 1	Top1
7.99742	8.48344						17	17	17	85.9	85.9	85.9	15.137	0	2826700000	69	14	16	14	16	8.84252	9.32854	n. def.	n. def.	Q497I3;Q05816;Q3TLH6	Q497I3;Q05816;Q3TLH6	Fatty acid-binding protein, epidermal	Fabp5
5.22141	5.77637						3	3	3	8.4	8.4	8.4	58.369	0	22922000	5	1	3	1	3	6.69854	7.25351	n. def.	n. def.	Q9DAW6;Q8BTJ0;Q059T9;Q80WA7	Q9DAW6;Q8BTJ0;Q059T9	U4/U6 small nuclear ribonucleoprotein Prp4	Prpf4
n. def.	n. def.	+					1	1	1	5.1	5.1	5.1	35.158	1	0	1	1	0	1	0	n. def.	n. def.	265	21	Q05A13	Q05A13	Short-chain dehydrogenase/reductase family 16C member 6	Sdr16c6
n. def.	6.32443						3	3	3	15.2	15.2	15.2	33.499	0	29550000	4	0	3	0	3	n. def.	7.47056	n. def.	n. def.	Q791V5;Q3UA17;Q05C68;A2AFW6;Q9D050	Q791V5;Q3UA17;Q05C68;A2AFW6;Q9D050	Mitochondrial carrier homolog 2	Mtch2
n. def.	5.48666						1	1	1	2.1	2.1	2.1	82.545	0	11040000	1	0	1	0	1	n. def.	7.04297	n. def.	n. def.	Q62018-2;Q05CJ7;Q05DK2;Q62018-3;Q62018	Q62018-2;Q05CJ7;Q05DK2;Q62018-3;Q62018	RNA polymerase-associated protein CTR9 homolog	Ctr9
n. def.	5.36222						2	2	2	5.1	5.1	5.1	68.285	0.003268	8059200	2	0	2	0	2	n. def.	6.90629	n. def.	n. def.	Q3UG81;Q3TPZ2;Q07832	Q3UG81;Q3TPZ2;Q07832	Serine/threonine-protein kinase PLK1	Plk1
5.78208	6.53306						2	2	2	18.8	18.8	18.8	15.959	0	28125000	5	1	1	1	1	6.62717	7.37816	n. def.	n. def.	Q3UYR3;Q08024-2;Q08024-4;Q08024	Q3UYR3;Q08024-2;Q08024-4;Q08024	Core-binding factor subunit beta	Cbfb
n. def.	5.44506						2	2	2	3.8	3.8	3.8	80.859	0	8359600	2	1	1	1	1	n. def.	6.92219	n. def.	n. def.	Q08943;Q08943-2;A2AW05;Q05DR5	Q08943;Q08943-2;A2AW05;Q05DR5	FACT complex subunit SSRP1	Ssrp1
n. def.	n. def.	+					1	1	1	5.6	5.6	5.6	31.349	1	0	1	0	1	0	1	n. def.	n. def.	n. def.	n. def.	Q08EB1;Q9D3V8	Q08EB1;Q9D3V8		Fam227a
6.69938	n. def.	+					1	1	1	6.2	6.2	6.2	31.922	1	90085000	1	1	0	1	0	7.95465	n. def.	n. def.	n. def.	Q08EK6;Q8BKW4-2;Q8BKW4	Q08EK6;Q8BKW4-2;Q8BKW4	Zinc finger CCHC domain-containing protein 4	Zcchc4
6.58743	6.75561						5	5	2	29.9	29.9	15.4	22.187	0	143460000	7	3	4	0	2	7.76352	7.9317	n. def.	n. def.	Q9D1G1;Q0PD66;Q3V3C2	Q9D1G1;Q0PD66;Q3V3C2	Ras-related protein Rab-1B	Rab1b
6.98114	7.33125						1	1	1	9.9	9.9	9.9	14.339	0.0031949	124060000	4	1	1	1	1	7.5832	7.93331	n. def.	n. def.	Q9D7S7-2;Q9D7S7;Q0VBA4	Q9D7S7-2;Q9D7S7;Q0VBA4	60S ribosomal protein L22-like 1	Rpl22l1
n. def.	5.39379						4	4	4	6.9	6.9	6.9	103.81	0	12876000	3	0	4	0	4	n. def.	7.10978	n. def.	n. def.	Q66JP8;Q3TLX0;Q7TT82;Q3THK4;Q6PGG1;Q571M7;Q0VBL3	Q66JP8;Q3TLX0;Q7TT82;Q3THK4;Q6PGG1;Q571M7;Q0VBL3		Rbm15
n. def.	n. def.	+					1	1	1	2.7	2.7	2.7	68.197	1	0	1	1	0	1	0	n. def.	n. def.	n. def.	n. def.	Q8BZP3;Q0VBN2	Q8BZP3;Q0VBN2	Dermatan-sulfate epimerase-like protein	Dsel
n. def.	5.50288	+					1	1	1	4.2	4.2	4.2	58.463	1	8913100	0	0	1	0	1	n. def.	6.95003	274	387	Q8BQU5;Q3U0E9;Q0VGT4	Q8BQU5;Q3U0E9;Q0VGT4	Uncharacterized protein C4orf21 homolog	4930422G04Rik
6.21872	6.52454						4	4	4	11.2	11.2	11.2	39.818	0	90015000	6	3	3	3	3	7.474	7.77981	n. def.	n. def.	Q8VH51-3;Q0VGU9;F7AA45;E9Q8F0;Q3UXT6;Q8VH51-2;Q3U313;Q8VH51;B7ZD61;B7ZD63	Q8VH51-3;Q0VGU9;F7AA45;E9Q8F0;Q3UXT6;Q8VH51-2;Q3U313;Q8VH51;B7ZD61	RNA-binding protein 39	Rbm39
5.705	6.42826						2	2	2	12	12	12	26.31	0	31878000	3	1	2	1	2	6.705	7.42826	n. def.	n. def.	Q9EP72;Q14C26	Q9EP72;Q14C26	ER membrane protein complex subunit 7	Emc7
n. def.	6.41631				OLIG2		17	17	17	19.4	19.4	19.4	141.55	0	169520000	19	0	17	0	17	n. def.	8.22922	n. def.	n. def.	Q9CW03;Q1HL32;Q6P5E5;Q6PIE1;Q3UNU2;Q6PFZ4;Q3TPG9;Q3TMK9;Q3US85	Q9CW03;Q1HL32;Q6P5E5;Q6PIE1;Q3UNU2;Q6PFZ4	Structural maintenance of chromosomes protein 3	Smc3
6.97168	7.56154						9	9	9	30.8	30.8	30.8	29.922	0	549670000	16	5	9	5	9	8.05088	8.64073	n. def.	n. def.	Q9D6G1;Q99020;Q544Z3;Q80XR6;Q3TMZ8;Q20BD0;Q8CIR3	Q9D6G1;Q99020;Q544Z3;Q80XR6;Q3TMZ8;Q20BD0	Heterogeneous nuclear ribonucleoprotein A/B	Hnrnpab
n. def.	n. def.						2	2	2	2	2	2	130.53	0.0054859	0	2	0	2	0	2	n. def.	n. def.	n. def.	n. def.	Q2EY15	Q2EY15	Protogenin	Prtg
n. def.	n. def.	+					1	1	1	0.3	0.3	0.3	569.65	1	0	1	0	1	0	1	n. def.	n. def.	430	4479	Q2QI47;Q2QI47-3	Q2QI47;Q2QI47-3	Usherin	Ush2A
n. def.	6.71559				OLIG2		5	5	4	18.1	18.1	16.2	45.899	0	103900000	6	0	5	0	4	n. def.	8.01662	n. def.	n. def.	Q32NY6;Q60632;B8JJI9;F7CII1;Q3UF74;D3YYP4;Q3UST6;P43135	Q32NY6;Q60632;B8JJI9;F7CII1;Q3UF74	COUP transcription factor 1	Nr2f1
5.48071	n. def.						2	2	2	6.9	6.9	6.9	61.67	0	8772100	2	2	0	2	0	6.9431	n. def.	n. def.	n. def.	Q3B7Z2-2;Q3B7Z2	Q3B7Z2-2;Q3B7Z2	Oxysterol-binding protein 1	Osbp
6.81957	7.45192						14	14	12	37.1	37.1	35.5	56.891	0	698180000	30	10	14	9	12	8.12061	8.75295	n. def.	n. def.	Q8BGJ5;Q3T984;Q922I7;Q5RJV5;Q8CB58;Q3TQW3;Q3UBR5;Q80T07;Q8K144;Q6NZB8;Q8R509;Q3U5I2;P17225;Q8C2R5;E9QMW9;Q923A7;F7DCW4;F7AXP1;E9Q0W3;E9Q279;F7C521;G3UXZ8	Q8BGJ5;Q3T984;Q922I7;Q5RJV5;Q8CB58;Q3TQW3;Q3UBR5;Q80T07;Q8K144;Q6NZB8;Q8R509;Q3U5I2;P17225;Q8C2R5;E9QMW9	Polypyrimidine tract-binding protein 1	Ptbp1
6.79983	7.22515						14	4	4	37.9	13.3	13.3	49.067	0	438910000	22	8	11	2	3	8.0786	8.5039	n. def.	n. def.	Q8VDW0;Q3U837;Q3T9L0;Q3UVN0;Q3TPL7;Q3TIE4;D6RHT5;Q3UAF1;Q8VDW0-2	Q8VDW0;Q3U837;Q3T9L0;Q3UVN0;Q3TPL7;Q3TIE4;D6RHT5;Q3UAF1	ATP-dependent RNA helicase DDX39A	Ddx39a;Ddx39
n. def.	5.50982						1	1	1	5.6	5.6	5.6	37.581	0	5822200	1	0	1	0	1	n. def.	6.76509	n. def.	n. def.	Q3T9V9;Q80X90	Q3T9V9;Q80X90	Filamin-B	Flnb
n. def.	6.14038						1	1	1	10.3	10.3	10.3	21.33	0	13816000	1	0	1	0	1	n. def.	7.14038	n. def.	n. def.	Q80UQ8;Q8BH43;Q3T9Z7	Q80UQ8;Q8BH43;Q3T9Z7	Wiskott-Aldrich syndrome protein family member 2	Wasf2
n. def.	5.59551						3	3	3	5.1	5.1	5.1	97.783	0	17731000	3	0	3	0	3	n. def.	7.24873	n. def.	n. def.	Q3TA68;Q505Q0;Q3TAQ9;Q8BHI6;Q6NSU4;Q8VDN1;Q3USW8	Q3TA68;Q505Q0;Q3TAQ9;Q8BHI6		Wdr36
5.59036	6.09482						4	3	2	10.1	8.9	6	70.528	0	62066000	9	3	4	2	2	7.17014	7.67459	n. def.	n. def.	Q3TA75;Q6P5B5;Q9WVR4	Q3TA75;Q6P5B5;Q9WVR4	Fragile X mental retardation syndrome-related protein 2	Fxr2
6.3811	6.69731						2	2	2	17.7	17.7	17.7	19.023	0	59086000	5	2	2	2	2	7.28418	7.6004	n. def.	n. def.	Q9CPP0;Q3TAH3	Q9CPP0;Q3TAH3	Nucleoplasmin-3	Npm3
6.53526	6.98512						10	10	10	31.1	31.1	31.1	43.363	0	209480000	17	4	10	4	10	7.73937	8.18924	n. def.	n. def.	Q3TGI9;Q3TAJ5;Q8BVY0;Q3TS64;Q3TH37;Q3UL54;Q3TN25;Q9CSF9;Q3TLJ3	Q3TGI9;Q3TAJ5;Q8BVY0;Q3TS64;Q3TH37;Q3UL54;Q3TN25;Q9CSF9;Q3TLJ3		Rsl1d1
5.43004	5.45886						3	3	3	10	10	10	49.564	0	13921000	5	3	2	3	2	6.82798	6.8568	n. def.	n. def.	Q3TB39;Q8BMS1	Q3TB39;Q8BMS1	Trifunctional enzyme subunit alpha, mitochondrial;Long-chain enoyl-CoA hydratase;Long chain 3-hydroxyacyl-CoA dehydrogenase	Hadha
n. def.	5.79367						1	1	1	7.5	7.5	7.5	18.002	0.008374	3731000	1	0	1	0	1	n. def.	6.57183	n. def.	n. def.	Q8BXA9;Q3TZC7;Q3TBS5;Q7TSH6;Q69ZP8;Q6PFF0;Q6DID3	Q8BXA9;Q3TZC7;Q3TBS5;Q7TSH6;Q69ZP8;Q6PFF0;Q6DID3	Protein SCAF8	Scaf4;Scaf8
n. def.	5.58324						1	1	1	3.1	3.1	3.1	53.133	0	9192900	2	0	1	0	1	n. def.	6.96345	n. def.	n. def.	Q8VEJ4;Q3TC83	Q8VEJ4;Q3TC83	Notchless protein homolog 1	Nle1
6.24881	6.93941						9	9	9	29.6	29.6	29.6	41.063	0	188480000	17	6	9	6	9	7.50408	8.19468	n. def.	n. def.	Q9WV32;Q3TCE7;Q91Z25;Q3U094;Q3TBA2;F6THG2;D3Z6S0;F6VVE6	Q9WV32;Q3TCE7;Q91Z25;Q3U094;Q3TBA2	Actin-related protein 2/3 complex subunit 1B	Arpc1b
n. def.	6.37803						2	2	2	17.5	17.5	17.5	24.838	0	23880000	2	0	2	0	2	n. def.	7.37803	n. def.	n. def.	Q9R0P9;Q3TCH2;I7ENE7	Q9R0P9;Q3TCH2;I7ENE7	Ubiquitin carboxyl-terminal hydrolase isozyme L1	Uchl1
5.15716	5.82109						3	3	2	6.1	6.1	4.4	69.035	0	29014000	5	2	3	1	2	6.71344	7.3774	n. def.	n. def.	Q8R1T2;Q3TCH7;F6UV36;Q3TLY0;E9PXT5;Q3UD60	Q8R1T2;Q3TCH7;F6UV36;Q3TLY0;E9PXT5;Q3UD60	Cullin-4A	Cul4a
4.85602	5.65277						3	3	3	5.7	5.7	5.7	79.198	0	18768000	3	1	3	1	3	6.41233	7.20906	n. def.	n. def.	Q91WG8;Q3TCI8;Q3UW64;G3UYD5;G3UX23;G3UZ98	Q91WG8;Q3TCI8;Q3UW64;G3UYD5;G3UX23	Bifunctional UDP-N-acetylglucosamine 2-epimerase/N-acetylmannosamine kinase;UDP-N-acetylglucosamine 2-epimerase (hydrolyzing);N-acetylmannosamine kinase	Gne
n. def.	5.36758						1	1	1	6.9	6.9	6.9	31.559	0.00086957	3263700	1	0	1	0	1	n. def.	6.51371	n. def.	n. def.	Q3TCM1;Q7TMI3	Q3TCM1;Q7TMI3	E3 ubiquitin-protein ligase UHRF2	Uhrf2
n. def.	5.70116						3	3	3	6.3	6.3	6.3	80.751	0	23619000	3	0	3	0	3	n. def.	7.37326	n. def.	n. def.	Q9QUR6;Q543B9;Q3TCS0;Q8C6A3;Q3TQ97	Q9QUR6;Q543B9;Q3TCS0;Q8C6A3	Prolyl endopeptidase	Prep
n. def.	5.72128						1	1	1	2.5	2.5	2.5	64.647	0.0024814	12633000	1	0	1	0	1	n. def.	7.10151	n. def.	n. def.	Q7M6Y3-2;Q3TD51;Q7M6Y3-3;Q7M6Y3-4;Q7M6Y3-6;Q7M6Y3-5;Q7M6Y3;Q570Z8	Q7M6Y3-2;Q3TD51;Q7M6Y3-3;Q7M6Y3-4;Q7M6Y3-6;Q7M6Y3-5;Q7M6Y3;Q570Z8	Phosphatidylinositol-binding clathrin assembly protein	Picalm
6.0086	6.43223						7	7	7	27.5	27.5	27.5	40.696	0	59607000	16	7	6	7	6	7.21272	7.63636	n. def.	n. def.	Q922K6;Q3TDD8;Q8BGD9;Q3UGC0;Q3TSY9;Q3TLQ9;Q3THB0;B2RWE8	Q922K6;Q3TDD8;Q8BGD9;Q3UGC0;Q3TSY9;Q3TLQ9;Q3THB0	Eukaryotic translation initiation factor 4B	Eif4b
n. def.	5.65324						2	2	2	7	7	7	50.23	0.0025	9000600	3	0	2	0	2	n. def.	6.95427	n. def.	n. def.	Q3TDN2-2;Q3TDN2;D3YUP4;D3Z2H4	Q3TDN2-2;Q3TDN2;D3YUP4;D3Z2H4	FAS-associated factor 2	Faf2
n. def.	6.65826						1	1	1	2.1	2.1	2.1	48.906	0.0096352	118370000	0	0	1	0	1	n. def.	8.07324	n. def.	n. def.	Q8VEJ9;Q3TDX2	Q8VEJ9;Q3TDX2	Vacuolar protein sorting-associated protein 4A	Vps4a
5.93752	6.18611						4	4	4	9.6	9.6	9.6	59.548	0	62426000	7	4	3	4	3	7.35249	7.60108	n. def.	n. def.	Q3TEA8-2;Z4YKB8;Q3TEA8;Q3B7C1;Z4YKA3;Q3TEA8-3;A2AM70;A2AM63;A2AM65;A2AM69;A2AM62	Q3TEA8-2;Z4YKB8;Q3TEA8;Q3B7C1;Z4YKA3;Q3TEA8-3;A2AM70;A2AM63;A2AM65	Heterochromatin protein 1-binding protein 3	Hp1bp3
6.19362	6.99008						23	23	23	29.8	29.8	29.8	119.73	0	680160000	38	11	22	11	22	7.97177	8.76823	n. def.	n. def.	Q91V92;Q3TED3;Q3V117;Q3UEA1;Q3TS02;Q3UVY4;Q99K05;Q6P063	Q91V92;Q3TED3;Q3V117;Q3UEA1	ATP-citrate synthase	Acly
6.46919	6.84529						10	10	10	25.7	25.7	25.7	53.12	0	189030000	16	7	8	7	8	7.74794	8.12405	n. def.	n. def.	Q9WUM4;Q5PPQ7;Q499X7;Q3TEU8;Q3TF74;Q3U8F0;E9PX03;E9PZJ0;E9PVJ1	Q9WUM4;Q5PPQ7;Q499X7;Q3TEU8;Q3TF74;Q3U8F0	Coronin-1C;Coronin	Coro1c
n. def.	5.50161						2	2	2	2.9	2.9	2.9	121.92	0.00088889	14600000	2	0	2	0	2	n. def.	7.16435	n. def.	n. def.	Q8R539;Q99ME2;Q3TMH3;Q3TEZ2	Q8R539;Q99ME2;Q3TMH3;Q3TEZ2	WD repeat-containing protein 6	Wdr6
6.05389	6.00182						2	2	2	11.7	11.7	11.7	23.363	0.0053558	25635000	2	1	1	1	1	7.13306	7.08099	n. def.	n. def.	Q9DB20;Q3THG0;Q3TF25;F6XVM5;F7D3P8	Q9DB20;Q3THG0;Q3TF25;F6XVM5;F7D3P8	ATP synthase subunit O, mitochondrial	Atp5o
6.69289	7.35129						11	10	10	29.8	28.1	28.1	54.54	0	575070000	22	7	10	7	9	8.01511	8.67351	n. def.	n. def.	Q99K48;Q4FK11;Q3UM20;Q3TF40;Q3TTV7;Q3TMM5;Q3TFC2;Q99K48-2	Q99K48;Q4FK11;Q3UM20;Q3TF40;Q3TTV7;Q3TMM5;Q3TFC2	Non-POU domain-containing octamer-binding protein	Nono
6.5163	6.91862						7	7	7	55.4	55.4	55.4	20.408	0	138890000	13	6	6	6	6	7.59549	7.99781	n. def.	n. def.	Q3TF84;Q922Q8;Q3UBL0	Q3TF84;Q922Q8	Leucine-rich repeat-containing protein 59	Lrrc59
5.69255	6.71065						9	9	9	22	22	22	57.147	0	202640000	16	4	9	4	9	7.24886	8.26696	n. def.	n. def.	Q922B2;Q8BK18;Q3TMC5;Q3TF87;Q3UJQ3;Q8BJY7	Q922B2;Q8BK18;Q3TMC5;Q3TF87;Q3UJQ3	Aspartate--tRNA ligase, cytoplasmic	Dars
n. def.	5.91556						1	1	1	6.5	6.5	6.5	31.244	0	9056300	1	0	1	0	1	n. def.	6.95695	n. def.	n. def.	Q3TFB5;Q99J77	Q3TFB5;Q99J77		Nans
6.10697	6.93865						7	7	7	30.1	30.1	30.1	45.745	0	219160000	13	3	7	3	7	7.44939	8.28108	n. def.	n. def.	Q9QYJ0;Q3TFF0	Q9QYJ0;Q3TFF0	DnaJ homolog subfamily A member 2	Dnaja2
n. def.	n. def.						1	1	1	17.4	17.4	17.4	8.3474	0.0024896	0	1	1	0	1	0	n. def.	n. def.	n. def.	n. def.	Q8CF51;Q3TFP0;Q9R0U0-3;Q3UDH7;Q3UA07;Q9R0U0-2;Q9R0U0;Q3UXS8;Q3UYX6	Q8CF51;Q3TFP0;Q9R0U0-3;Q3UDH7;Q3UA07;Q9R0U0-2;Q9R0U0;Q3UXS8;Q3UYX6	Serine/arginine-rich splicing factor 10	Fusip1;Srsf10
5.58774	5.99463						4	4	4	9.6	9.6	9.6	54.467	0	37118000	7	3	4	3	4	7.01912	7.42599	n. def.	n. def.	Q3UYC2;Q3TMX6;Q3TG12;Q9WUA2;Q9CZU5;Q3TI98;Q8C644;A0A087WS80;A0A087WPV4	Q3UYC2;Q3TMX6;Q3TG12;Q9WUA2;Q9CZU5;Q3TI98;Q8C644	Phenylalanine--tRNA ligase beta subunit	Farsb
n. def.	5.48497						1	1	1	3.1	3.1	3.1	43.887	0.0053971	8247600	1	0	1	0	1	n. def.	6.91633	n. def.	n. def.	Q9Z1G3;Q9D9Z4;Q3TG21	Q9Z1G3;Q9D9Z4;Q3TG21	V-type proton ATPase subunit C 1	Atp6v1c1
n. def.	6.82626						2	2	2	16.2	16.2	16.2	25.186	0	80435000	2	0	2	0	2	n. def.	7.90545	n. def.	n. def.	Q9WUK2-2;Q3TG58;Q80U88;Q9WUK2;Q564E5;Q3V244	Q9WUK2-2;Q3TG58;Q80U88;Q9WUK2;Q564E5;Q3V244	Eukaryotic translation initiation factor 4H	Eif4h
n. def.	5.29922						2	2	2	2.4	2.4	2.4	121.58	0	7966800	2	0	2	0	2	n. def.	6.90128	n. def.	n. def.	Q8CGF7-2;Q8CGF7;Q3TH57;Q8CGF7-3	Q8CGF7-2;Q8CGF7;Q3TH57;Q8CGF7-3	Transcription elongation regulator 1	Tcerg1
5.90579	6.42478						5	5	5	24.1	24.1	24.1	35.638	0	65824000	7	4	3	4	3	7.18455	7.70354	n. def.	n. def.	Q9Z1D1;Q544H0;Q3THA0	Q9Z1D1;Q544H0;Q3THA0	Eukaryotic translation initiation factor 3 subunit G	Eif3g
6.43431	6.8255						3	3	3	26.8	26.8	26.8	17.89	0	94096000	4	2	2	2	2	7.43431	7.8255	n. def.	n. def.	Q8BL97-3;Q8BL97-4;Q8BL97-2;Q3THA6;Q8BL97	Q8BL97-3;Q8BL97-4;Q8BL97-2;Q3THA6;Q8BL97	Serine/arginine-rich splicing factor 7	Srsf7
6.41263	6.86196						15	15	15	27.1	27.1	27.1	73.74	0	463570000	25	10	11	10	11	8.08472	8.53406	n. def.	n. def.	Q9D0E1-2;Q3TW40;Q3THB3;Q9D0E1;B8JK33;Q3TL61;B8JK32;Q570Z0;A0A1S6GWJ8;Q3TQ66;F6W322	Q9D0E1-2;Q3TW40;Q3THB3;Q9D0E1;B8JK33;Q3TL61;B8JK32;Q570Z0;A0A1S6GWJ8;Q3TQ66	Heterogeneous nuclear ribonucleoprotein M	Hnrnpm
5.45352	n. def.						1	1	1	3.9	3.9	3.9	48.1	0.0089779	4830200	1	1	0	1	0	6.68397	n. def.	n. def.	n. def.	Q922R8;Q3TML0;Q3TJL8;Q3THH1	Q922R8;Q3TML0;Q3TJL8;Q3THH1	Protein disulfide-isomerase A6	Pdia6
n. def.	6.07896						1	1	1	6.7	6.7	6.7	28.163	0	11994000	1	0	1	0	1	n. def.	7.07896	n. def.	n. def.	Q8BVJ2;Q3THK3	Q8BVJ2;Q3THK3	General transcription factor IIF subunit 1	Gtf2f1
6.24222	6.36248						3	3	3	20.8	20.8	20.8	20.189	0	44558000	5	3	2	3	2	7.28362	7.40388	n. def.	n. def.	Q3THL2;Q9Z2U0;Q542H2;Q3UIT9;Q3TN31;B7ZMS3;B7ZMS4;Q9CWH6	Q3THL2;Q9Z2U0;Q542H2;Q3UIT9;Q3TN31	Proteasome subunit alpha type-7;Proteasome subunit alpha type	Psma7
5.72906	6.3768						6	6	6	13.3	13.3	13.3	62.581	0	99179000	8	1	6	1	6	7.26052	7.90827	n. def.	n. def.	Q60864;Q3THQ5	Q60864;Q3THQ5	Stress-induced-phosphoprotein 1	Stip1
5.58356	6.589						7	7	7	25.3	25.3	25.3	39.832	0	85297000	10	2	7	2	7	6.88459	7.89003	n. def.	n. def.	Q91WK2;Q8BTX5;Q5M9L0;Q3TII2;Q3THW7;Q3TIK5;Q8BMZ8	Q91WK2;Q8BTX5;Q5M9L0;Q3TII2;Q3THW7;Q3TIK5	Eukaryotic translation initiation factor 3 subunit H	Eif3h
n. def.	4.9878				OLIG2		2	2	2	2.9	2.9	2.9	91.707	0	3597500	2	0	2	0	2	n. def.	6.556	n. def.	n. def.	Q91W96;Q3TM92;Q3TI31;Q3TSH0	Q91W96;Q3TM92;Q3TI31;Q3TSH0	Anaphase-promoting complex subunit 4	Anapc4
6.1803	6.3909						10	10	10	16.4	16.4	16.4	100.2	0	194750000	16	6	8	6	8	7.87049	8.0811	n. def.	n. def.	Q8VDM4;Q3TXV1;Q3TWL6;Q3TW71;Q3TKV1;Q3TIP0;Q3TI61;Q3U9Y8;Q80V77;Q99JX8;Q9CRK7;E9Q2S8	Q8VDM4;Q3TXV1;Q3TWL6;Q3TW71;Q3TKV1;Q3TIP0;Q3TI61;Q3U9Y8;Q80V77	26S proteasome non-ATPase regulatory subunit 2	Psmd2
5.94972	6.20634						7	7	7	19.6	19.6	19.6	57.401	0	74965000	10	6	4	6	4	7.42684	7.68345	277	295	Q9ESX5;Q3TM67;Q3TI79;B7ZCL7;F6YUI5;A2AN81;F6S1S5	Q9ESX5;Q3TM67;Q3TI79;B7ZCL7;F6YUI5	H/ACA ribonucleoprotein complex subunit 4	Dkc1
5.13405	5.92965						4	4	4	8.7	8.7	8.7	64.282	0	27625000	6	1	4	1	4	6.5812	7.37681	n. def.	n. def.	Q61024;Q3TIA9;Q3TV20;D3Z0C2	Q61024;Q3TIA9;Q3TV20	Asparagine synthetase [glutamine-hydrolyzing];Asparagine synthetase	Asns
n. def.	5.89436						2	2	2	12.9	12.9	12.9	27.123	0	10977000	3	1	2	1	2	n. def.	7.04048	n. def.	n. def.	Q3TYL7;Q9QYJ3;Q3TU79;Q3TIT6	Q3TYL7;Q9QYJ3;Q3TU79;Q3TIT6	DnaJ homolog subfamily B member 1	Dnajb1
5.86631	6.8036						14	14	14	21	21	21	107.91	0	347760000	19	5	14	5	14	7.55651	8.49379	n. def.	n. def.	Q3U868;Q921K2;Q3TX36;Q3TIV3;Q3UJ03;Q3TF18;Q3TM68;P11103;P11103-2;A0A0A6YX03;A0A0A6YVX0;Q3UX06	Q3U868;Q921K2;Q3TX36;Q3TIV3;Q3UJ03;Q3TF18;Q3TM68;P11103;P11103-2	Poly [ADP-ribose] polymerase 1	Parp1
5.50249	5.8856						1	1	1	11.3	11.3	11.3	17.078	0	9778200	3	1	1	1	1	6.45673	6.83984	n. def.	n. def.	Q3TIV5-3;Q3TIV5	Q3TIV5-3;Q3TIV5	Zinc finger CCCH domain-containing protein 15	Zc3h15
6.44843	6.97775						13	13	13	25.7	25.7	25.7	67.839	0	344640000	24	8	13	8	13	7.89559	8.4249	n. def.	n. def.	Q99MN1;Q8C292;Q8C1V4;Q3TIV6;Q8CFK5;Q8R2P8	Q99MN1;Q8C292;Q8C1V4;Q3TIV6;Q8CFK5;Q8R2P8	Lysine--tRNA ligase	Kars
6.0798	6.96856						9	9	9	21.2	21.2	21.2	55.249	0	252080000	17	6	7	6	7	7.46001	8.34877	n. def.	n. def.	Q99LF4;Q3TJ01	Q99LF4;Q3TJ01	tRNA-splicing ligase RtcB homolog	D10Wsu52e
n. def.	5.91877						2	2	2	3.3	3.3	3.3	83.957	0	31518000	2	0	2	0	2	n. def.	7.49856	n. def.	n. def.	Q3UQJ1;Q9EQH3;Q3TRJ1;Q3TKU6;Q3TJ43	Q3UQJ1;Q9EQH3;Q3TRJ1;Q3TKU6;Q3TJ43	Vacuolar protein sorting-associated protein 35	Vps35
n. def.	5.10612						1	1	1	6	6	6	50.301	0.0070922	3319600	1	0	1	0	1	n. def.	6.52109	n. def.	n. def.	Q3TJY1;Q99L90;Q3TYU7	Q3TJY1;Q99L90;Q3TYU7	Microspherule protein 1	Mcrs1
n. def.	n. def.						1	1	1	3	3	3	35.093	0.0090592	0	1	0	1	0	1	n. def.	n. def.	n. def.	n. def.	Q3TJY5;Q8CDT0;Q8C7D0;Q9Z1M8;Q8C2T9	Q3TJY5;Q8CDT0;Q8C7D0;Q9Z1M8;Q8C2T9	Protein Red	Ik
4.70248	5.6707						2	2	2	6.5	6.5	6.5	60.786	0	16605000	5	1	2	1	2	6.20763	7.17586	n. def.	n. def.	Q8CI11;Q3TK27;Q8CI11-2	Q8CI11;Q3TK27;Q8CI11-2	Guanine nucleotide-binding protein-like 3	Gnl3
n. def.	5.5459						1	1	1	3.5	3.5	3.5	57.696	0	8787100	2	0	1	0	1	n. def.	6.94385	n. def.	n. def.	Q9Z1K6;Q3TK92	Q9Z1K6;Q3TK92	E3 ubiquitin-protein ligase ARIH2	Arih2
n. def.	6.29425						4	4	4	18.1	18.1	18.1	30.637	0	31505000	3	0	4	0	4	n. def.	7.49838	n. def.	n. def.	Q8BY26;Q8R323;Q3TKD1	Q8BY26;Q8R323;Q3TKD1	Replication factor C subunit 3	Rfc3
n. def.	6.10684						3	3	3	16.3	16.3	16.3	38.117	0	26857000	4	0	3	0	3	n. def.	7.42906	n. def.	n. def.	Q8BK64;Q3TL79	Q8BK64;Q3TL79	Activator of 90 kDa heat shock protein ATPase homolog 1	Ahsa1
n. def.	n. def.	+					1	1	1	4.2	4.2	4.2	34.462	1	0	1	1	0	1	0	n. def.	n. def.	n. def.	n. def.	Q3UQM8;Q3TLJ6;Q8BMS4	Q3UQM8;Q3TLJ6;Q8BMS4	Hexaprenyldihydroxybenzoate methyltransferase, mitochondrial	Coq3
6.4061	6.98307						6	6	0	15.3	15.3	0	52.675	0	255460000	12	5	5	0	0	7.72831	8.30529	249	453	Q3TLQ0;Q80X35;Q80ZL4;B2KGT5;G3UWW1;G3UZJ2	Q3TLQ0;Q80X35;Q80ZL4;B2KGT5;G3UWW1;G3UZJ2	Microtubule-associated protein	Map2
5.99478	6.93918						5	5	5	18.7	18.7	18.7	40.581	0	174260000	10	2	5	2	5	7.25005	8.19446	n. def.	n. def.	Q920E5;Q5M8R9;Q4FJN9;Q3TMB3;A0A0G2JE82;Q3US29;A0A0G2JEA5;A0A0G2JDJ5;A0A0G2JEB3	Q920E5;Q5M8R9;Q4FJN9;Q3TMB3;A0A0G2JE82;Q3US29	Farnesyl pyrophosphate synthase	Fdps
6.34906	7.17333						8	8	8	29.1	29.1	29.1	48.107	0	342770000	17	3	8	3	8	7.6501	8.47435	n. def.	n. def.	Q3UDF8;Q9Z0N1;Q3UIJ2;Q3TML6;A2AAW9;Q9CRE9;Q3U5H6;Q9Z0N2;Q9D791;Q6NY07	Q3UDF8;Q9Z0N1;Q3UIJ2;Q3TML6;A2AAW9;Q9CRE9;Q3U5H6;Q9Z0N2	Eukaryotic translation initiation factor 2 subunit 3, X-linked;Eukaryotic translation initiation factor 2 subunit 3, Y-linked	Eif2s3x;Eif2s3y
n. def.	5.2893						3	3	3	5.8	5.8	5.8	100.62	0	8760400	3	0	3	0	3	n. def.	6.94252	n. def.	n. def.	Q3TMP1	Q3TMP1		Gtf3c3
5.24971	n. def.						1	1	1	2.2	2.2	2.2	69.409	0.00087489	5331300	1	1	0	1	0	6.72683	n. def.	n. def.	n. def.	Q3TN26;Q3TP13;Q60714;Q544D7	Q3TN26;Q3TP13;Q60714;Q544D7	Long-chain fatty acid transport protein 1	Slc27a1
4.81269	5.11823						1	1	1	2.5	2.5	2.5	68.97	0	5887600	2	1	1	1	1	6.28981	6.59534	n. def.	n. def.	Q60596;Q3U2B4;Q3TN28	Q60596;Q3U2B4;Q3TN28	DNA repair protein XRCC1	Xrcc1
n. def.	5.57201						2	2	2	5.7	5.7	5.7	59.374	0	10451000	2	0	2	0	2	n. def.	7.01916	n. def.	n. def.	Q8C7V3;Q3TN42	Q8C7V3;Q3TN42	U3 small nucleolar RNA-associated protein 15 homolog	Utp15
6.65888	6.78227						2	2	2	11.9	11.9	11.9	21.782	0	84931000	2	2	1	2	1	7.56197	7.68537	n. def.	n. def.	Q9QUI0;Q62159;Q4VAE6;Q3TN61;H3BL56;A0A0A6YXF6	Q9QUI0;Q62159;Q4VAE6;Q3TN61;H3BL56;A0A0A6YXF6	Transforming protein RhoA;Rho-related GTP-binding protein RhoC	Rhoa;Rhoc
7.97329	7.54595						21	21	2	55.3	55.3	3.4	46.049	0	2712900000	60	20	17	2	1	9.2955	8.86817	n. def.	n. def.	Q61029-3;Q3TNH0	Q61029-3;Q3TNH0	Lamina-associated polypeptide 2, isoforms beta/delta/epsilon/gamma	Tmpo
5.30792	5.68369						2	2	2	4.9	4.9	4.9	52.107	0	19892000	4	2	2	2	2	6.77033	7.1461	n. def.	n. def.	Q3TPJ4;Q3UR29;Q99ME9	Q3TPJ4;Q3UR29;Q99ME9	Nucleolar GTP-binding protein 1	Gtpbp4
5.85027	5.94784						5	5	5	14	14	14	75.472	0	70190000	10	3	4	3	4	7.49372	7.5913	n. def.	n. def.	Q3TQL4;Q8CAQ8-3;Q3U7N2;Q3TVZ5;Q8CAQ8-2;E9QAY6;A0A0U1RP81;Q3TEY5;E9Q800;Q8CAQ8;Q8CAQ8-5;Q2YDW0;Q8CAQ8-4;A0A1B0GX08;Q3TZK4;A0A0U1RQ14;Q6P8Y5	Q3TQL4;Q8CAQ8-3;Q3U7N2;Q3TVZ5;Q8CAQ8-2;E9QAY6;A0A0U1RP81;Q3TEY5;E9Q800;Q8CAQ8;Q8CAQ8-5	Mitochondrial inner membrane protein	Immt
n. def.	6.4276						4	4	4	15.6	15.6	15.6	48.328	0	58887000	6	2	3	2	3	n. def.	7.77002	n. def.	n. def.	Q3TRH2;Q9D8W5;Q3U8F5;B1AT36;Q9CSW4	Q3TRH2;Q9D8W5;Q3U8F5;B1AT36	26S proteasome non-ATPase regulatory subunit 12	Psmd12
6.15721	6.9459						23	23	23	35.9	35.9	35.9	102.09	0	554300000	41	9	21	9	21	7.88962	8.67829	n. def.	n. def.	Q78PY7;Q3UZI3;Q3TW51;Q3TRW3;Q3TJ56;E9Q3E9	Q78PY7;Q3UZI3;Q3TW51;Q3TRW3;Q3TJ56	Staphylococcal nuclease domain-containing protein 1	Snd1
n. def.	6.15909						2	2	2	11.5	11.5	11.5	29.466	0	23078000	3	1	2	1	2	n. def.	7.3632	n. def.	n. def.	Q8BTU5;Q9R1P4;Q3TS44;A0A1B0GS70	Q8BTU5;Q9R1P4;Q3TS44;A0A1B0GS70	Proteasome subunit alpha type;Proteasome subunit alpha type-1	Psma1
n. def.	6.41726	+					1	1	1	6	6	6	22.659	1	28751000	0	0	1	0	1	n. def.	7.45865	n. def.	n. def.	Q6PES1;Q3TS83;Q5KU39	Q6PES1;Q3TS83;Q5KU39	Vacuolar protein sorting-associated protein 41 homolog	Vps41
6.06528	n. def.						1	1	1	2.5	2.5	2.5	67.732	0.0090341	34865000	1	1	0	1	0	7.54239	n. def.	n. def.	n. def.	Q8VEB1;Q3TST4	Q8VEB1;Q3TST4	G protein-coupled receptor kinase 5	Grk5
4.97124	n. def.						1	1	1	1.6	1.6	1.6	89.996	0.0032494	3650100	1	1	0	1	0	6.5623	n. def.	n. def.	n. def.	Q3TSX5;Q8R3N1	Q3TSX5;Q8R3N1	Nucleolar protein 14	Nop14
4.81123	5.70889						4	4	4	8.8	8.8	8.8	67.589	0	17865000	5	1	4	1	4	6.30259	7.20025	n. def.	n. def.	Q9CZW5;Q3TSX8;Q80TT4	Q9CZW5;Q3TSX8;Q80TT4	Mitochondrial import receptor subunit TOM70	Tomm70a
n. def.	5.90345						5	5	5	9.6	9.6	9.6	92.618	0	34428000	4	0	5	0	5	n. def.	7.53691	n. def.	n. def.	Q3TT04;Q8BKC5;Q7TN23;Q8BKC5-2;Q6NZC1	Q3TT04;Q8BKC5;Q7TN23;Q8BKC5-2	Importin-5	Ipo5
6.52955	7.08952						14	14	14	22.5	22.5	22.5	94.629	0	579930000	28	7	13	7	13	8.09774	8.65772	n. def.	n. def.	Q8K310;Q5BL18;Q3TTX0;Q6ZQ61;Q4FJT0;Q3TZN1;Q9R0U5;A0A087WSU2;A0A087WSP7;A0A087WQZ1;Q3UFN8;A0A087WNP3;A0A087WPU5;A0A087WPQ5;A0A087WQD6;A0A087WQP4;A0A087WSF8;A0A087WQ54;A0A087WNW7	Q8K310;Q5BL18;Q3TTX0;Q6ZQ61;Q4FJT0;Q3TZN1;Q9R0U5;A0A087WSU2	Matrin-3	Matr3
n. def.	n. def.	+					1	1	1	2.1	2.1	2.1	86.139	1	0	1	0	1	0	1	n. def.	n. def.	284	481	Q3TTY0-2;Q3TTY0-3;Q3TTY0	Q3TTY0-2;Q3TTY0-3;Q3TTY0	Phospholipase B1, membrane-associated;Phospholipase A2;Lysophospholipase	Plb1
4.9458	4.05835						2	2	2	3.5	3.5	3.5	77.508	0	3489700	2	1	1	1	1	6.48987	5.60242	n. def.	n. def.	Q8BPA6;Q3TU98;Q8CDT3;Q9JKF1;Q80UW7;Q6ZQK2;Q8CC64	Q8BPA6;Q3TU98;Q8CDT3;Q9JKF1;Q80UW7;Q6ZQK2;Q8CC64	Ras GTPase-activating-like protein IQGAP1	Iqgap1
n. def.	5.36483						1	1	1	3.2	3.2	3.2	56.425	0	6254500	2	0	1	0	1	n. def.	6.79619	n. def.	n. def.	Q3TUH8;Q8C050-2;Q8C050	Q3TUH8;Q8C050-2;Q8C050	Ribosomal protein S6 kinase alpha-5	Rps6ka5
n. def.	5.30666						2	2	2	3.7	3.7	3.7	79.761	0	6686100	1	0	2	0	2	n. def.	6.82517	n. def.	n. def.	Q8K2F0;Q4G5Y4;Q3TUI3;Q8K2F0-2;Q5CCJ9;Q53TY6;Q05DR7;A2AKA9	Q8K2F0;Q4G5Y4;Q3TUI3;Q8K2F0-2;Q5CCJ9;Q53TY6;Q05DR7;A2AKA9	Bromodomain-containing protein 3	Brd3
n. def.	6.57071						1	1	1	7.9	7.9	7.9	26.411	0	40936000	1	0	1	0	1	n. def.	7.61211	n. def.	n. def.	Q9Z2U1;Q3UPK6;Q3TUX3;Q3TUI9	Q9Z2U1;Q3UPK6;Q3TUX3;Q3TUI9	Proteasome subunit alpha type-5;Proteasome subunit alpha type	Psma5
n. def.	5.1983						3	3	3	6.9	6.9	6.9	62.727	0	4420400	2	0	3	0	3	n. def.	6.64546	n. def.	n. def.	Q3TUQ7;Q5EG47;Q8BUX6	Q3TUQ7;Q5EG47	5-AMP-activated protein kinase catalytic subunit alpha-1	Prkaa1
5.84435	6.12333						1	1	1	3.8	3.8	3.8	32.065	0.0077739	20272000	2	1	1	1	1	6.84435	7.12333	n. def.	n. def.	Q9CY50;Q3TV94;Q52PE3	Q9CY50;Q3TV94;Q52PE3	Translocon-associated protein subunit alpha	Ssr1
5.87092	6.66572						3	3	3	24.4	24.4	24.4	18.936	0	32246000	5	2	3	2	3	6.64907	7.44387	n. def.	n. def.	Q62186;Q3TVJ8;Q9D8L3;Q9D6F7;Q9DC94	Q62186;Q3TVJ8;Q9D8L3;Q9D6F7;Q9DC94	Translocon-associated protein subunit delta	Ssr4
7.05614	7.56001						26	26	26	37.6	37.6	37.6	87.917	0	1669100000	60	14	24	14	24	8.6002	9.10408	n. def.	n. def.	Q8VEK3;Q3ULH5;Q3TVV6;Q8VEK3-2;O88568;Q8C290;Q3TWN5;Q3TXW2;Q3TGN5;Q3TS50	Q8VEK3;Q3ULH5;Q3TVV6;Q8VEK3-2;O88568;Q8C290;Q3TWN5;Q3TXW2;Q3TGN5;Q3TS50	Heterogeneous nuclear ribonucleoprotein U	Hnrnpu
5.90648	6.112						7	7	7	10.5	10.5	10.5	101.2	0	105020000	13	5	5	5	5	7.60545	7.81096	n. def.	n. def.	Q922D8;Q3TW74;Q3UZH3;A0A1W2P733;Q8BXX7;A0A1W2P7L5;Q8BY49	Q922D8;Q3TW74;Q3UZH3;A0A1W2P733;Q8BXX7	C-1-tetrahydrofolate synthase, cytoplasmic;Methylenetetrahydrofolate dehydrogenase;Methenyltetrahydrofolate cyclohydrolase;Formyltetrahydrofolate synthetase;C-1-tetrahydrofolate synthase, cytoplasmic, N-terminally processed	Mthfd1
n. def.	5.60967						6	6	6	12.9	12.9	12.9	72.062	0	16690000	6	1	5	1	5	n. def.	7.22246	n. def.	n. def.	Q3UZ27;Q3UGW8;Q9Z110-2;Q9Z110;Q3TWN8;D3Z0B4	Q3UZ27;Q3UGW8;Q9Z110-2;Q9Z110;Q3TWN8	Delta-1-pyrroline-5-carboxylate synthase;Glutamate 5-kinase;Gamma-glutamyl phosphate reductase	Aldh18a1
n. def.	6.0886						2	2	2	8.4	8.4	8.4	33.692	0	19620000	2	0	2	0	2	n. def.	7.2927	n. def.	n. def.	Q91VH6;Q3TWT2	Q91VH6;Q3TWT2	Protein MEMO1	Memo1
6.35239	6.87125						6	6	5	18.6	18.6	15.9	39.025	0	145280000	8	4	4	3	3	7.52848	8.04735	n. def.	n. def.	Q3TWW8;Q8BKL0;Q5U448;A0A0A6YXX6;O35326;Q9D8S5	Q3TWW8;Q8BKL0		Srsf6
n. def.	5.20044						1	1	1	2.6	2.6	2.6	61.154	0.005891	3966300	1	0	1	0	1	n. def.	6.59839	n. def.	n. def.	Q3TXH8;Q923D5;Q3UKQ3;Q3U6Q1	Q3TXH8;Q923D5;Q3UKQ3;Q3U6Q1	WW domain-binding protein 11	Wbp11
5.07558	5.32292						3	3	3	3.4	3.4	3.4	105.73	0	15480000	4	2	2	2	2	6.74769	6.99502	n. def.	n. def.	Q3TXS7;A0JLU3;Q8CGI9;Q5HZG6;Q8BU34;Q8CGG2;Q05CG9;J3QN38	Q3TXS7;A0JLU3;Q8CGI9;Q5HZG6;Q8BU34;Q8CGG2;Q05CG9	26S proteasome non-ATPase regulatory subunit 1	Psmd1
5.68086	6.80942				OLIG2		11	11	11	31.1	31.1	31.1	51.112	0	187040000	12	4	10	4	10	7.11224	8.24077	n. def.	n. def.	Q9WTM5;Q3UXP2;Q3TXT7;A0A1B0GSR4;A0A1B0GRW3;A0A1B0GT54	Q9WTM5;Q3UXP2;Q3TXT7	RuvB-like 2	Ruvbl2
5.61686	5.58713						2	2	2	12.9	12.9	12.9	21.331	0	10405000	2	1	1	1	1	6.73081	6.70107	n. def.	n. def.	Q921E2;Q3TXV4;Q3TM43;D6RFT6;A2ARZ7;Q9CXG2;Q0PD34;P35285	Q921E2;Q3TXV4;Q3TM43;D6RFT6;A2ARZ7;Q9CXG2;Q0PD34;P35285	Ras-related protein Rab-31;Ras-related protein Rab-22A	Rab31;Rab22a
n. def.	5.30397						1	1	1	4.3	4.3	4.3	34.909	0.0058954	4228600	1	0	1	0	1	n. def.	6.6262	n. def.	n. def.	Q9WUD1;Q3TYJ0	Q9WUD1;Q3TYJ0	STIP1 homology and U box-containing protein 1	Stub1
5.76329	6.64999						4	4	4	22.6	22.6	22.6	28.783	0	55512000	4	2	4	2	4	6.80469	7.69138	n. def.	n. def.	Q9CS50;Q3UBA7;Q9DBC7;Q3TYK4;Q8C3Z4	Q9CS50;Q3UBA7;Q9DBC7;Q3TYK4;Q8C3Z4	cAMP-dependent protein kinase type I-alpha regulatory subunit;cAMP-dependent protein kinase type I-alpha regulatory subunit, N-terminally processed	Prkar1a
5.41649	6.48876						9	9	9	14.9	14.9	14.9	106.91	0	170460000	18	5	9	5	9	7.12405	8.19634	n. def.	n. def.	Q8BGQ7;Q6XMP4;Q3UD67;Q3TZ32;Q8R346;Q6PDM7	Q8BGQ7;Q6XMP4;Q3UD67;Q3TZ32;Q8R346;Q6PDM7	Alanine--tRNA ligase, cytoplasmic	Aars
n. def.	5.60534						2	2	2	7.8	7.8	7.8	47.252	0	7657500	2	0	2	0	2	n. def.	6.88409	n. def.	n. def.	Q3TZG8;Q52KQ8;Q6AXH3;Q6DIB4;Q3UH85;Q3TPB4	Q3TZG8;Q52KQ8;Q6AXH3;Q6DIB4;Q3UH85;Q3TPB4	Uncharacterized protein C20orf112 homolog	8430427H17Rik
6.52718	7.08664				SOX2		19	19	17	35.9	35.9	32.5	75.029	0	700870000	43	14	16	13	14	8.18038	8.73986	n. def.	n. def.	Q9R190;Q3TZP3;Q3UDZ8;H3BLE1;Q3TY62	Q9R190;Q3TZP3;Q3UDZ8	Metastasis-associated protein MTA2	Mta2
n. def.	5.26489						1	1	1	3.4	3.4	3.4	46.838	0.005997	3680500	1	0	1	0	1	n. def.	6.56591	n. def.	n. def.	Q9CZK0;Q91VH2;Q3U1P2;Q3TZU7	Q9CZK0;Q91VH2;Q3U1P2;Q3TZU7	Sorting nexin-9	Snx9
n. def.	6.70953	+					1	1	1	16.5	16.5	16.5	11.898	1	25615000	1	0	1	0	1	n. def.	7.40849	285	83	Q3TZV3	Q3TZV3		Gm10755
6.32989	6.60549						11	11	11	23.3	23.3	23.3	76.775	0	203580000	16	8	8	8	8	7.8484	8.12401	n. def.	n. def.	Q3U0V1	Q3U0V1	Far upstream element-binding protein 2	Khsrp
n. def.	5.3329						1	1	1	6.7	6.7	6.7	30.181	0.0054222	3658900	1	0	1	0	1	n. def.	6.56335	n. def.	n. def.	Q8BN37;Q8R4Z4;Q3U1H6	Q8BN37;Q8R4Z4;Q3U1H6	ETS translocation variant 3	Etv3
5.46572	6.45646						9	9	9	12.5	12.5	12.5	126.85	0	173400000	19	2	9	2	9	7.2061	8.19681	n. def.	n. def.	Q3U1J4;Q91YC8;Q3ULS8	Q3U1J4;Q91YC8	DNA damage-binding protein 1	Ddb1
5.49072	5.44381						5	5	5	9	9	9	85.652	0	25845000	6	2	4	2	4	7.13418	7.08728	n. def.	n. def.	Q8JZN2;Q3U4S7;Q91W50;Q3U1S6;Q80TP8;Q8R3R1;Q3TXH7;Q05C63;Q3U672;A0A0G2JF72;Q3UJ74	Q8JZN2;Q3U4S7;Q91W50;Q3U1S6;Q80TP8;Q8R3R1;Q3TXH7;Q05C63;Q3U672;A0A0G2JF72	Cold shock domain-containing protein E1	Csde1
n. def.	5.65521						2	1	1	3.3	1.7	1.7	94.08	0.00085034	22603000	2	0	2	0	1	n. def.	7.35417	n. def.	n. def.	Q99L75;Q61316;Q3U2G2;Q571M2;Q8C6R3	Q99L75;Q61316;Q3U2G2;Q571M2;Q8C6R3	Heat shock 70 kDa protein 4	Hspa4
6.10982	6.40322						17	17	17	14.8	14.8	14.8	152.04	0	271100000	27	11	14	11	14	7.96108	8.25448	n. def.	n. def.	Q7TPV4;Q3U2W2;A0JLT5;Q3TLF6	Q7TPV4;Q3U2W2;A0JLT5;Q3TLF6	Myb-binding protein 1A	Mybbp1a
5.70076	6.503						10	10	10	11.6	11.6	11.6	140.21	0	217490000	16	2	10	2	10	7.47161	8.27386	n. def.	n. def.	Q9Z1Q9;Q7TPT7;Q790I0;Q3U3D3;G3UY93;Q3TII4;G3UZ22;G3UYW2	Q9Z1Q9;Q7TPT7;Q790I0;Q3U3D3;G3UY93;Q3TII4	Valine--tRNA ligase	Vars
5.16628	5.46043						2	2	2	10	10	10	33.062	0	7400900	2	1	1	1	1	6.39674	6.69089	n. def.	n. def.	Q8BHW1;Q5SSI6;Q3U3Q3;Q3TJX6	Q8BHW1;Q5SSI6;Q3U3Q3;Q3TJX6	U3 small nucleolar RNA-associated protein 18 homolog	Utp18
6.4541	6.58708						10	1	1	17.6	1.5	1.5	73.427	0.0084211	281800000	18	9	7	1	1	8.07733	8.21035	n. def.	n. def.	Q62095;Q3U484	Q62095;Q3U484	ATP-dependent RNA helicase DDX3Y	Ddx3y
5.97121	6.62629						2	2	2	10.4	10.4	10.4	30.016	0	77480000	4	1	2	1	2	7.14731	7.80238	n. def.	n. def.	Q61166;Q3U4H0	Q61166;Q3U4H0	Microtubule-associated protein RP/EB family member 1	Mapre1
6.39945	7.18957						21	21	21	38.8	38.8	38.8	81.21	0	665310000	45	11	21	11	21	7.96765	8.75777	n. def.	n. def.	Q61881;Q3UDI8;Q3U4T8;Q3V122;D3Z6N3;D3Z335;D3Z0J6;D3Z2K9	Q61881;Q3UDI8;Q3U4T8;Q3V122	DNA replication licensing factor MCM7	Mcm7
7.67077	7.97799						10	10	10	46.1	46.1	46.1	24.831	0	1419200000	28	8	9	8	9	8.67077	8.97799	n. def.	n. def.	Q5XJF6;Q3U561;P53026;Q99JL6;D6RE43	Q5XJF6;Q3U561;P53026;Q99JL6	Ribosomal protein;60S ribosomal protein L10a	Rpl10a
6.39524	6.79302						8	8	8	17.8	17.8	17.8	66.125	0	199950000	17	5	7	5	7	7.75697	8.15476	n. def.	n. def.	Q3U6A2;Q8C2Q3;E9QL13;Q8C2Q3-2;Q62019;J3QN51;J3QPT3;B0LM42;F7BGR7	Q3U6A2;Q8C2Q3;E9QL13;Q8C2Q3-2;Q62019	RNA-binding protein 14	Rbm14
5.99186	6.21632						4	4	4	15.7	15.7	15.7	44.93	0	42032000	6	2	3	2	3	7.19598	7.42043	n. def.	n. def.	Q8VE37;Q3U6D2;Q6PFB2;A2CER2	Q8VE37;Q3U6D2;Q6PFB2	Regulator of chromosome condensation	Rcc1
5.49812	5.93621						2	2	2	8.1	8.1	8.1	30.755	0.00089127	20030000	3	1	2	1	2	6.72856	7.16667	n. def.	n. def.	Q60932-2;Q3U6K8;Q60932;F2Z471;Q3TIG8;Q3THL7	Q60932-2;Q3U6K8;Q60932;F2Z471;Q3TIG8;Q3THL7	Voltage-dependent anion-selective channel protein 1	Vdac1
n. def.	5.79947						1	1	1	7.7	7.7	7.7	14.807	0.0054138	4411300	1	0	1	0	1	n. def.	6.64457	n. def.	n. def.	Q99JU9;Q3U6K9;Q99K85;Q8BTJ1;Q543K5;Q3ULZ3	Q99JU9;Q3U6K9;Q99K85;Q8BTJ1;Q543K5;Q3ULZ3	Phosphoserine aminotransferase	Psat1
6.62316	6.9555						7	7	7	21.6	21.6	21.6	32.223	0	238060000	16	5	7	5	7	7.87843	8.21077	n. def.	n. def.	Q9Z204-4;Q9Z204-3;Q9Z204-2;Q9Z204-5;Q9Z204;Q3U6P5	Q9Z204-4;Q9Z204-3;Q9Z204-2;Q9Z204-5;Q9Z204;Q3U6P5	Heterogeneous nuclear ribonucleoproteins C1/C2	Hnrnpc
7.00195	7.37575						13	8	8	25.4	17.2	17.2	72.399	0	1081600000	21	6	11	1	8	8.50709	8.88091	n. def.	n. def.	Q501J6;Q3U741;Q501J6-2;Q3TU25;Q8K392;Q3U6Y5;Q78W10	Q501J6;Q3U741;Q501J6-2;Q3TU25	Probable ATP-dependent RNA helicase DDX17	Ddx17
6.30266	6.62233						4	4	4	16.8	16.8	16.8	43.086	0	61986000	6	3	3	3	3	7.30266	7.62233	n. def.	n. def.	Q9JII5-2;Q3U878;Q9JII5;Q3UGB5;D3Z4J1	Q9JII5-2;Q3U878;Q9JII5;Q3UGB5;D3Z4J1	DAZ-associated protein 1	Dazap1
5.25597	6.94822						11	11	11	29.2	29.2	29.2	69.036	0	253580000	24	4	10	4	10	6.70312	8.39538	n. def.	n. def.	Q8VEE4;Q5SWN2;Q3U8B3	Q8VEE4;Q5SWN2;Q3U8B3	Replication protein A 70 kDa DNA-binding subunit;Replication protein A 70 kDa DNA-binding subunit, N-terminally processed	Rpa1
5.70369	6.52551						7	7	7	33.6	33.6	33.6	32.237	0	57886000	7	3	4	3	4	6.87978	7.7016	n. def.	n. def.	Q8CDN6;Q3U8R9;Q3UNH3;Q3UBF4	Q8CDN6;Q3U8R9;Q3UNH3;Q3UBF4	Thioredoxin-like protein 1	Txnl1
n. def.	5.85233						2	2	2	6.1	6.1	6.1	42.935	0	14947000	2	0	2	0	2	n. def.	7.17455	n. def.	n. def.	Q3UDD3;Q8BG81;Q3U8V1;Q8C713;F6VR84;Q3TJ78;Q571G8	Q3UDD3;Q8BG81;Q3U8V1;Q8C713;F6VR84;Q3TJ78;Q571G8	Polymerase delta-interacting protein 3	Poldip3
5.80489	6.57277						6	6	6	18.1	18.1	18.1	37.881	0	65658000	7	2	5	2	5	6.98098	7.74886	n. def.	n. def.	Q6IRT4;Q9DCH4;Q8BTW2;Q3UVY8;Q3U8X1;B0LAD0;Q8VH52	Q6IRT4;Q9DCH4;Q8BTW2;Q3UVY8;Q3U8X1	Eukaryotic translation initiation factor 3 subunit F	Eif3f
6.38887	6.66968						8	8	8	18.9	18.9	18.9	68.396	0	263520000	16	6	7	6	7	7.95707	8.23787	n. def.	n. def.	Q5RKP4;Q91YQ5;Q8BMR3;Q3U900;Q99LY0;A0A0N4SUJ8	Q5RKP4;Q91YQ5;Q8BMR3;Q3U900;Q99LY0	Dolichyl-diphosphooligosaccharide--protein glycosyltransferase subunit 1	Rpn1
7.9846	7.56895						21	2	2	54.6	7.3	7.3	50.372	0	2805200000	57	20	18	2	2	9.30681	8.89117	n. def.	n. def.	Q61029;Q3UR33;Q3U955;Q3U7B3;Q61029-2;Q61029-4;Q61033-2;Q78WP6;Q3TXQ1	Q61029;Q3UR33;Q3U955;Q3U7B3;Q61029-2;Q61029-4	Lamina-associated polypeptide 2, isoforms beta/delta/epsilon/gamma	Tmpo
7.08447	6.85691						12	12	12	24	24	24	71.439	0	444830000	31	12	6	12	6	8.44621	8.21864	n. def.	n. def.	Q3U9G9;A0A0A6YY12;A0A0A6YXT6;A0A0A6YW01;A0A0A6YXW3	Q3U9G9	Lamin-B receptor	Lbr
5.8618	6.5519						5	5	5	15.1	15.1	15.1	53.247	0	98697000	6	1	5	1	5	7.22352	7.91363	n. def.	n. def.	Q9DCD0;Q91V28;Q3UAG2;Q91YT9	Q9DCD0;Q91V28;Q3UAG2;Q91YT9	6-phosphogluconate dehydrogenase, decarboxylating	Pgd
5.23505	5.18121						2	2	2	5.1	5.1	5.1	76.148	0	11326000	4	2	1	2	1	6.77911	6.72528	n. def.	n. def.	Q3UQU5;Q80W39;Q3UJB0;Q3UBH2;Q3UAI4;Q8BL33	Q3UQU5;Q80W39;Q3UJB0;Q3UBH2;Q3UAI4;Q8BL33		Sf3b2
n. def.	5.67857						3	3	3	6.5	6.5	6.5	91.612	0	25761000	2	0	3	0	3	n. def.	7.41096	n. def.	n. def.	Q8BMQ2;Q501L4;Q3UAY3;Q8BMQ2-3;E9Q2B0;Q8BMQ2-2;Q3UJL1	Q8BMQ2;Q501L4;Q3UAY3;Q8BMQ2-3;E9Q2B0	General transcription factor 3C polypeptide 4	Gtf3c4
5.10619	5.90731						3	3	3	11.1	11.1	11.1	40.742	0	19646000	3	1	3	1	3	6.42841	7.22953	n. def.	n. def.	Q9CR16;Q3UB60;Q8BMX6	Q9CR16;Q3UB60	Peptidyl-prolyl cis-trans isomerase D	Ppid
7.86722	8.08077						20	2	0	61.9	7.2	0	41.768	0	3881900000	70	17	20	0	0	9.16826	9.38178	n. def.	n. def.	Q3UBP6;A0A1D5RM20;Q61852	Q3UBP6		Actb
7.85158	8.06217	+					19	1	1	57.5	2.7	2.7	41.764	1	3728900000	68	16	19	1	1	9.15262	9.3632	n. def.	n. def.	Q3UBQ4	Q3UBQ4		Actb
5.93572	6.67273						8	8	8	30.8	30.8	30.8	46.657	0	150370000	13	3	8	3	8	7.36708	8.10408	n. def.	n. def.	Q61598-2;Q61598;Q3UC72;Q3UPA3;Q3UUX9;Q3TIY6;Q9CZ18;P50396	Q61598-2;Q61598;Q3UC72;Q3UPA3;Q3UUX9;Q3TIY6	Rab GDP dissociation inhibitor beta	Gdi2
6.67412	7.0083						2	2	2	19.4	19.4	19.4	16.46	0	104400000	5	2	2	2	2	7.51921	7.85339	n. def.	n. def.	Q8BMJ3;Q60872;Q4FJR7;Q3UC76;Q3UTA4;Q3UJQ5;Q3TQZ4;M0QWL1;J3QQ02;J3QPI8;J3QP87;J3QNT6;A0A1W2P883	Q8BMJ3;Q60872;Q4FJR7;Q3UC76;Q3UTA4;Q3UJQ5;Q3TQZ4;M0QWL1;J3QQ02;J3QPI8;J3QP87;J3QNT6;A0A1W2P883	Eukaryotic translation initiation factor 1A, X-chromosomal;Eukaryotic translation initiation factor 1A	Eif1ax;Eif1a;Gm2022;Gm2016;Gm21936;Gm2056;Gm6803;Gm2035;Gm5039
5.00479	6.14897						7	7	7	12.3	12.3	12.3	92.188	0	57390000	9	2	5	2	5	6.58457	7.72874	n. def.	n. def.	Q6A068;Q3UCF2;A0A1W2P7S8;A0A1W2P855;A0A1W2P7Z8;A0A1W2P7H4;A0A1W2P6Q8;Q05DT4	Q6A068;Q3UCF2;A0A1W2P7S8	Cell division cycle 5-like protein	Cdc5l
5.51049	n. def.						2	2	2	7	7	7	62.368	0	8099000	2	2	0	2	0	6.90843	n. def.	n. def.	n. def.	Q6PAM1;Q3UD58;A8Y5J8;A2ADZ3;A2ADZ4;A2ADZ2;Q6PAM1-2;Q3UXT5	Q6PAM1;Q3UD58;A8Y5J8;A2ADZ3;A2ADZ4;A2ADZ2;Q6PAM1-2;Q3UXT5	Alpha-taxilin	Txlna
n. def.	6.33296				OLIG2		2	2	2	14	14	14	31.824	0	30136000	3	0	2	0	2	n. def.	7.47909	n. def.	n. def.	Q9JJD1;Q9Z0H3-2;Q9ESU0;Q3UDA4;Q9Z0H3;Q9ESU1;Q6ZWP4;F6U415	Q9JJD1;Q9Z0H3-2;Q9ESU0;Q3UDA4;Q9Z0H3;Q9ESU1;Q6ZWP4;F6U415	SWI/SNF-related matrix-associated actin-dependent regulator of chromatin subfamily B member 1	Smarcb1
n. def.	5.57113						1	1	1	3	3	3	36.991	0.0053354	7077600	1	0	1	0	1	n. def.	6.84989	n. def.	n. def.	Q8CFZ9;Q9D0F6;Q5HZI8;Q3UDK3	Q8CFZ9;Q9D0F6;Q5HZI8;Q3UDK3	Replication factor C subunit 5	Rfc5
n. def.	5.32414						2	2	2	7.4	7.4	7.4	43.846	0	5273400	2	0	2	0	2	n. def.	6.72209	n. def.	n. def.	Q9D826;Q3UEJ8	Q9D826;Q3UEJ8	Peroxisomal sarcosine oxidase	Pipox
n. def.	n. def.	+					1	1	1	8.2	8.2	8.2	20.378	1	0	1	0	1	0	1	n. def.	n. def.	286	129	Q3UF90	Q3UF90
n. def.	4.54559						1	1	1	1.7	1.7	1.7	83.99	0.00086881	1299500	1	0	1	0	1	n. def.	6.11378	n. def.	n. def.	Q3UFS0	Q3UFS0	Protein zyg-11 homolog B	Zyg11b
6.40843	6.17181						3	3	3	10.1	10.1	10.1	37.582	0	52603000	4	2	2	2	2	7.52237	7.28576	n. def.	n. def.	Q3UFZ6;Q60865	Q3UFZ6;Q60865	Caprin-1	Caprin1
4.67526	5.28706						2	2	2	2.8	2.8	2.8	95.986	0	12533000	2	1	1	1	1	6.39125	7.00307	n. def.	n. def.	Q60790;Q3UGJ5;Q8C6G4	Q60790;Q3UGJ5;Q8C6G4	Ras GTPase-activating protein 3	Rasa3
5.62146	6.44663						4	4	3	17.2	17.2	14.2	38.611	0	51438000	6	2	4	1	3	6.82558	7.65075	n. def.	n. def.	Q7TNC4-2;Q7TNC4-3;Q3UGK2;Q7TNC4-4;Q3UZ17;Q7TNC4;E9Q715;Q3U5L2;Q05CX5;Q3USM3	Q7TNC4-2;Q7TNC4-3;Q3UGK2;Q7TNC4-4;Q3UZ17;Q7TNC4;E9Q715;Q3U5L2;Q05CX5;Q3USM3	Putative RNA-binding protein Luc7-like 2	Luc7l2
5.90547	5.82856						2	2	2	6	6	6	51.425	0	28086000	3	2	1	2	1	7.18421	7.10731	n. def.	n. def.	Q99KN9-2;Q5SUH7;Q3UPG6;Q3UGL3;Q99KN9;Q5SUH6	Q99KN9-2;Q5SUH7;Q3UPG6;Q3UGL3;Q99KN9;Q5SUH6	Clathrin interactor 1	Clint1
n. def.	5.85526						2	2	2	7.5	7.5	7.5	39.019	0	15764000	2	0	2	0	2	n. def.	7.19767	n. def.	n. def.	Q3V2D7;Q9JM05;Q3ULQ6;Q3UGQ2	Q3V2D7;Q9JM05;Q3ULQ6;Q3UGQ2	E3 SUMO-protein ligase PIAS4	Pias4
n. def.	5.24502						2	2	2	2.8	2.8	2.8	140.18	0	11076000	2	0	2	0	2	n. def.	7.04438	n. def.	n. def.	Q3UH06-4;Q3UH06-2;Q3UH06;Q3UH06-3	Q3UH06-4;Q3UH06-2;Q3UH06;Q3UH06-3	Ras-responsive element-binding protein 1	Rreb1
5.10633	6.10154						8	4	3	5	2.8	2.3	228.99	0	141890000	12	4	8	1	3	7.11494	8.11012	n. def.	n. def.	Q61879;Q5SV64;Q3UH59;Q8BWI3;Q8BLI3;Q8BLI1;Q80T68;Q8BXF2	Q61879;Q5SV64;Q3UH59;Q8BWI3;Q8BLI3;Q8BLI1;Q80T68	Myosin-10	Myh10
4.80986	5.16504						2	2	2	3.4	3.4	3.4	94.66	0	8009500	2	1	1	1	1	6.38964	6.74483	n. def.	n. def.	Q3UHJ0-2;Q3UHJ0	Q3UHJ0-2;Q3UHJ0	AP2-associated protein kinase 1	Aak1
n. def.	4.84724						1	1	1	8.3	8.3	8.3	19.532	0	773810	1	0	1	0	1	n. def.	5.88863	n. def.	n. def.	Q3V0M6;Q9D2N4-7;Q9D2N4-4;Q9D2N4-3;Q8CFR5;Q3UHP1;Q3UHJ2;Q9D2N4-2;Q9D2N4	Q3V0M6;Q9D2N4-7;Q9D2N4-4;Q9D2N4-3;Q8CFR5;Q3UHP1;Q3UHJ2;Q9D2N4-2;Q9D2N4	Dystrobrevin alpha	Dtna
4.92816	6.60175				OLIG2		14	14	14	20.3	20.3	20.3	108.35	0	195930000	14	3	13	3	13	6.6094	8.28298	n. def.	n. def.	Q3UHU8;G3UYD0;Q9ESZ8-5;Q9ESZ8-4;Q9ESZ8-3;Q9ESZ8-6;Q9ESZ8-2;Q9ESZ8;G3UYJ6;G3UWV2;G3UYD7;G3UZU4;G3UY14;G3UWP6;G3UX27;Q99NI3	Q3UHU8;G3UYD0;Q9ESZ8-5;Q9ESZ8-4;Q9ESZ8-3;Q9ESZ8-6;Q9ESZ8-2;Q9ESZ8;G3UYJ6	General transcription factor II-I	Gtf2i
6.31854	6.55091						4	4	4	11.7	11.7	11.7	64.988	0	95845000	10	2	4	2	4	7.54899	7.78137	n. def.	n. def.	Q5SUT0;Q61545;Q3UI30;Q6NVA3;Q5SUS9;Q9CRS5;Q3UGI7;Q5SUS8	Q5SUT0;Q61545;Q3UI30;Q6NVA3;Q5SUS9;Q9CRS5	RNA-binding protein EWS	Ewsr1
n. def.	n. def.						1	1	1	1.5	1.5	1.5	67.468	0.0058394	0	1	0	1	0	1	n. def.	n. def.	n. def.	n. def.	Q8CCD4;Q64701-2;Q3UI58;Q6PAR4;Q64701	Q8CCD4;Q64701-2;Q3UI58;Q6PAR4;Q64701	Retinoblastoma-like protein 1	Rbl1
4.69827	4.83003						2	2	2	3.7	3.7	3.7	59.867	0.005418	3408400	2	1	1	1	1	6.16065	6.29243	n. def.	n. def.	Q8R2T8-2;Q3UI98;Q8R2T8	Q8R2T8-2;Q3UI98;Q8R2T8	General transcription factor 3C polypeptide 5	Gtf3c5
n. def.	5.42757				OLIG2		2	2	2	2.2	2.2	2.2	121.37	0	13918000	2	0	2	0	2	n. def.	7.14358	n. def.	n. def.	Q6PDG5-2;Q3UID0;Q6PDG5;A0A1W2P6N7;Q3UZD0;P97496-2;Q3UNN4;Q3UPK0;Q3UMX0;P97496	Q6PDG5-2;Q3UID0;Q6PDG5;A0A1W2P6N7;Q3UZD0;P97496-2;Q3UNN4;Q3UPK0;Q3UMX0;P97496	SWI/SNF complex subunit SMARCC2;SWI/SNF complex subunit SMARCC1	Smarcc2;Smarcc1
n. def.	5.14746				OLIG2		2	2	2	4.1	4.1	4.1	85.669	0	3651100	2	1	1	1	1	n. def.	6.56242	n. def.	n. def.	Q9QYH6;Q8K2H5;Q3UXM3;Q3UIL5;Q91W72;Q571N9	Q9QYH6;Q8K2H5;Q3UXM3;Q3UIL5;Q91W72;Q571N9	Melanoma-associated antigen D1	Maged1
n. def.	5.78873						1	1	1	5	5	5	31.869	0.0077793	10452000	1	0	1	0	1	n. def.	7.0192	n. def.	n. def.	Q3UIR2;Q9D902	Q3UIR2;Q9D902	General transcription factor IIE subunit 2	Gtf2e2
n. def.	5.64599				OLIG2		2	2	2	3.6	3.6	3.6	78.447	0	12392000	2	0	2	0	2	n. def.	7.09314	n. def.	n. def.	Q8CB43;Q61624;Q548L0;Q3UJ69	Q8CB43;Q61624;Q548L0;Q3UJ69	Zinc finger protein 148	Zfp148;Znf148
5.79594	6.64049						9	9	8	18.8	18.8	16.3	57.552	0	124880000	13	4	9	4	8	7.19388	8.03842	n. def.	n. def.	Q8K0I5;Q8JZK9;Q3UWQ9;Q3UJ70;Q3UKE7;Q8C5F4;Q8N7N8;P54869	Q8K0I5;Q8JZK9;Q3UWQ9;Q3UJ70;Q3UKE7;Q8C5F4	Hydroxymethylglutaryl-CoA synthase, cytoplasmic	Hmgcs1
n. def.	4.81304						1	1	1	1.2	1.2	1.2	143.13	0.0054517	4421300	1	0	1	0	1	n. def.	6.64555	n. def.	n. def.	Q6P5B0;Q3UJA1	Q6P5B0;Q3UJA1	RRP12-like protein	Rrp12
6.18696	7.20341						9	9	6	36	36	32.2	47.789	0	280190000	20	3	9	1	6	7.39108	8.40753	n. def.	n. def.	Q60973;Q3UJI2;A2AFI9;Q3UX53;A2AFJ1;Q8C5H3;F6ZLC6;F6U539	Q60973;Q3UJI2;A2AFI9;Q3UX53;A2AFJ1;Q8C5H3;F6ZLC6	Histone-binding protein RBBP7	Rbbp7
4.7054	5.25003						2	2	2	3.2	3.2	3.2	107.5	0	10744000	3	1	2	1	2	6.37751	6.92214	n. def.	n. def.	Q64737;Q3UJP8;D6RCG1;Q64737-2;Q3TH49	Q64737;Q3UJP8;D6RCG1;Q64737-2;Q3TH49	Trifunctional purine biosynthetic protein adenosine-3;Phosphoribosylamine--glycine ligase;Phosphoribosylformylglycinamidine cyclo-ligase;Phosphoribosylglycinamide formyltransferase	Gart
5.98181	6.94021						2	1	1	29.5	17.1	17.1	11.802	0	38691000	3	1	2	1	1	6.58387	7.54227	n. def.	n. def.	Q3UJQ2	Q3UJQ2		Hmgcs1
6.00346	6.27919						3	3	3	19.8	19.8	19.8	17.699	0	20369000	2	1	2	1	2	6.84855	7.12428	n. def.	n. def.	Q64152-2;Q3UJR8;Q64152	Q64152-2;Q3UJR8	Transcription factor BTF3	Btf3
n. def.	5.51264						2	2	2	3.7	3.7	3.7	64.979	0	8464700	2	0	2	0	2	n. def.	6.92761	n. def.	n. def.	Q9CWL8;Q3UKS4;Q3UJX2	Q9CWL8;Q3UKS4;Q3UJX2	Beta-catenin-like protein 1	Ctnnbl1
5.41348	6.17826						5	5	5	11.5	11.5	11.5	57.543	0	45931000	8	2	5	2	5	6.82845	7.59323	n. def.	n. def.	Q3UKJ7;Q3UKJ7-2	Q3UKJ7;Q3UKJ7-2	WD40 repeat-containing protein SMU1	Smu1
n. def.	5.9634						1	1	1	9.2	9.2	9.2	24.325	0.0032026	9191900	1	0	1	0	1	n. def.	6.96341	n. def.	n. def.	Q9NWG9;Q3UKU3	Q9NWG9;Q3UKU3	Melanoma-associated antigen H1	Mageh1
n. def.	5.72279						4	4	4	11.9	11.9	11.9	56.475	0	16374000	4	0	4	0	4	n. def.	7.21415	n. def.	n. def.	Q9QYI3;Q3UL32	Q9QYI3;Q3UL32	DnaJ homolog subfamily C member 7	Dnajc7
4.67963	5.30149						3	3	3	3.3	3.3	3.3	150.19	0	14386000	3	1	2	1	2	6.44306	7.06491	n. def.	n. def.	Q3UL43;Q99P88;Q80X48;Q6ZQ45;Q8BUA6	Q3UL43;Q99P88;Q80X48;Q6ZQ45	Nuclear pore complex protein Nup155	Nup155
6.39889	6.65441						15	15	15	21.4	21.4	21.4	91.663	0	336860000	29	10	14	10	14	8.08016	8.33566	n. def.	n. def.	Q9CWZ5;Q9JIK5;Q6PCP0;Q3ULC7;Q8K2L4	Q9CWZ5;Q9JIK5;Q6PCP0;Q3ULC7;Q8K2L4	Nucleolar RNA helicase 2	Ddx21
n. def.	4.49524						1	1	1	1.1	1.1	1.1	93.05	0.0057929	1595200	1	0	1	0	1	n. def.	6.20282	n. def.	n. def.	Q80W00-2;Q3ULI5;Q80W00	Q80W00-2;Q3ULI5;Q80W00	Serine/threonine-protein phosphatase 1 regulatory subunit 10	Ppp1r10
n. def.	6.37882						4	4	4	14.5	14.5	14.5	38.092	0	47846000	4	1	3	1	3	n. def.	7.67985	n. def.	n. def.	Q99L45;Q3ULL5;E0CXJ3	Q99L45;Q3ULL5	Eukaryotic translation initiation factor 2 subunit 2	Eif2s2
4.74679	6.12946						10	10	10	10.7	10.7	10.7	134.24	0	91200000	10	2	9	2	9	6.5597	7.94237	n. def.	n. def.	Q8CG48;Q3ULS2;Q6IR05;B1AWH6;Q3TT08	Q8CG48;Q3ULS2;Q6IR05	Structural maintenance of chromosomes protein 2;Structural maintenance of chromosomes protein	Smc2
n. def.	5.21801						2	2	2	3.4	3.4	3.4	82.27	0	6442700	2	0	2	0	2	n. def.	6.80907	n. def.	n. def.	Q9JK30-2;Q9JK30;Q3ULT0;A2AT40	Q9JK30-2;Q9JK30;Q3ULT0;A2AT40	Origin recognition complex subunit 3	Orc3
n. def.	5.56875						4	4	4	5.5	5.5	5.5	135.63	0	21487000	6	0	4	0	4	n. def.	7.33218	n. def.	n. def.	Q6ZQ73;Q3UM57;Q3TD19;Q9CSM7	Q6ZQ73;Q3UM57;Q3TD19	Cullin-associated NEDD8-dissociated protein 2	Cand2
n. def.	4.79819						1	1	1	1.7	1.7	1.7	136.37	0	4084200	2	0	1	0	1	n. def.	6.61111	n. def.	n. def.	Q3UMB9	Q3UMB9	WASH complex subunit 7	Kiaa1033
n. def.	n. def.						1	1	1	4.8	4.8	4.8	28.381	0.0032051	0	1	0	1	0	1	n. def.	n. def.	n. def.	n. def.	Q8R0A0;Q3UMJ4	Q8R0A0;Q3UMJ4	General transcription factor IIF subunit 2	Gtf2f2
7.26689	7.74126						12	1	1	24.6	2.7	2.7	50.09	0.0071174	1472000000	36	8	12	1	1	8.56791	9.0423	n. def.	n. def.	Q922F4;Q3UMM1;Q3U9U3;Q9CUN8;Q9CRT0	Q922F4;Q3UMM1;Q3U9U3;Q9CUN8;Q9CRT0	Tubulin beta-6 chain	Tubb6;Tubb3
6.46702	6.53811						7	7	7	22.9	22.9	22.9	44.005	0	108520000	12	5	6	5	6	7.69746	7.76856	n. def.	n. def.	Q3UMP4;Q9CY58;A0A0N4SV32;Q9CY58-3;Q3V274;Q3UEI6;Q9CY58-2;Q3UJK2;A0A0N4SUQ1;A0A0N4SUN8;A0A0N4SWH2;Q9CY58-4;A0A0N4SV40;A0A0N4SVK5	Q3UMP4;Q9CY58;A0A0N4SV32;Q9CY58-3;Q3V274;Q3UEI6;Q9CY58-2;Q3UJK2;A0A0N4SUQ1;A0A0N4SUN8;A0A0N4SWH2;Q9CY58-4;A0A0N4SV40	Plasminogen activator inhibitor 1 RNA-binding protein	Serbp1
n. def.	6.92957						4	1	1	11.9	2.7	2.7	43.421	0.0084626	153050000	4	0	4	0	1	n. def.	8.18483	n. def.	n. def.	Q5DTI7;Q3UN01;Q9WVB2;E9PV07;Q6IR16	Q5DTI7;Q3UN01;Q9WVB2;E9PV07;Q6IR16	Transducin-like enhancer protein 2	Tle2
n. def.	8.28943				OLIG2	+	17	17	14	55.8	55.8	51.5	27.141	0	2726200000	29	0	17	0	14	n. def.	9.43556	n. def.	n. def.	Q9JKN5;Q3UN59;Q3TY96	Q9JKN5;Q3UN59;Q3TY96	Oligodendrocyte transcription factor 1	Olig1
4.82128	5.0687						1	1	1	2.2	2.2	2.2	62.279	0	3668000	2	1	1	1	1	6.12231	6.36972	n. def.	n. def.	Q91YT7;Q3UNH5	Q91YT7;Q3UNH5		Ythdf2
5.88131	n. def.						1	1	1	1.6	1.6	1.6	116.75	0.0039588	41087000	1	1	0	1	0	7.6137	n. def.	408	460	Q3UP24	Q3UP24	NLR family CARD domain-containing protein 4	Nlrc4
n. def.	6.12594						5	5	5	6.9	6.9	6.9	129.56	0	62811000	7	0	5	0	5	n. def.	7.79804	n. def.	n. def.	Q3UPL0-2;Q3UPL0;S4R2A9;S4R192	Q3UPL0-2;Q3UPL0;S4R2A9	Protein transport protein Sec31A	Sec31a
n. def.	5.19181	+					1	1	1	5.6	5.6	5.6	20.913	1	1555300	0	0	1	0	1	n. def.	6.19181	n. def.	n. def.	Q3UQ04	Q3UQ04		Gm7628
4.87799	7.40929				OLIG2		37	1	1	42.4	2.5	2.5	136.54	0	1621400000	51	2	37	0	1	6.67733	9.20863	n. def.	n. def.	Q3UQJ9	Q3UQJ9		Trps1
n. def.	5.26479						1	1	1	4.8	4.8	4.8	33.578	0.0054348	3311700	1	0	1	0	1	n. def.	6.52005	n. def.	n. def.	Q9D338;Q6P8U3;Q3URF5	Q9D338;Q6P8U3;Q3URF5	39S ribosomal protein L19, mitochondrial	Mrpl19
n. def.	5.01119						1	1	1	1	1	1	131.73	0.0060241	5335900	2	1	1	1	1	n. def.	6.72721	n. def.	n. def.	Q3URV1-2;Q3URV1	Q3URV1-2;Q3URV1	Protein broad-minded	bromi
n. def.	5.07842						2	2	2	3.1	3.1	3.1	120.21	0.0090403	5630100	1	0	2	0	2	n. def.	6.75052	n. def.	n. def.	Q8K1K1;Q6P6L6;Q3URX8	Q8K1K1;Q6P6L6;Q3URX8		Gemin4
6.27503	5.45133						3	3	3	8.8	8.8	8.8	40.686	0	43330000	5	3	1	3	1	7.57606	6.75236	n. def.	n. def.	U3M993;Q9R1J0;Q7TPY3;Q3US15;Q8VE30	U3M993;Q9R1J0;Q7TPY3;Q3US15	Sterol-4-alpha-carboxylate 3-dehydrogenase, decarboxylating	Nsdhl
6.02857	n. def.						1	1	1	1.1	1.1	1.1	122.67	0.005948	57674000	0	1	0	1	0	7.76098	n. def.	n. def.	n. def.	Q3USB7	Q3USB7	Inactive phospholipase C-like protein 1	Plcl1
n. def.	5.89634						2	2	2	4	4	4	74.305	0.0058352	24417000	2	0	2	0	2	n. def.	7.38769	n. def.	n. def.	Q8BQM4;Q3USC0;Q8K2Q1;E9PWH6	Q8BQM4;Q3USC0;Q8K2Q1;E9PWH6	HEAT repeat-containing protein 3	Heatr3
5.18372	5.27231						1	1	1	2.2	2.2	2.2	82.405	0	13935000	3	1	1	1	1	6.79652	6.8851	n. def.	n. def.	Q3USJ8-3;Q3USJ8;Q3USJ8-2	Q3USJ8-3;Q3USJ8;Q3USJ8-2	FCH and double SH3 domains protein 2	Fchsd2
n. def.	6.78132						5	5	5	13.8	13.8	13.8	68.349	0	139010000	6	0	5	0	5	n. def.	8.14305	n. def.	n. def.	Q3USR8;Q3UYZ8;Q61164	Q3USR8;Q3UYZ8;Q61164	Transcriptional repressor CTCF	Ctcf
6.48014	n. def.	+					1	1	1	8.2	8.2	8.2	11.155	1	15104000	3	1	1	1	1	7.17909	n. def.	n. def.	n. def.	Q3UTE1	Q3UTE1		Gm4832
n. def.	6.41567						3	3	3	25.5	25.5	25.5	18.37	0	26042000	4	0	3	0	3	n. def.	7.41567	n. def.	n. def.	Q9QUR7;Q3UTI7	Q9QUR7;Q3UTI7	Peptidyl-prolyl cis-trans isomerase NIMA-interacting 1	Pin1
7.27933	7.414						1	1	1	8.3	8.3	8.3	14.626	0.00086133	314770000	3	1	1	1	1	8.12444	8.25909	411	5	Q9D8D5;Q3UTQ9	Q9D8D5;Q3UTQ9		Zmynd8
6.48041	6.68251						3	1	1	4	1.5	1.5	62.844	0.0053071	282120000	5	3	2	1	1	8.03671	8.2388	n. def.	n. def.	Q3UV17	Q3UV17	Keratin, type II cytoskeletal 2 oral	Krt76
5.03015	5.61428						2	2	2	4.6	4.6	4.6	71.781	0	17632000	5	1	2	1	2	6.56164	7.14576	n. def.	n. def.	Q99LE6;Q3UVI9	Q99LE6;Q3UVI9	ATP-binding cassette sub-family F member 2	Abcf2
n. def.	5.19593						1	1	1	1	1	1	100.15	0.00084459	5338400	1	0	1	0	1	n. def.	6.72741	n. def.	n. def.	Q3UVK0	Q3UVK0	Endoplasmic reticulum metallopeptidase 1	Ermp1
n. def.	6.88467						2	1	1	8.1	4.8	4.8	28.285	0.0064982	69010000	2	0	2	0	1	n. def.	7.83891	n. def.	n. def.	Q3UW32;Q9EST5;Q9EST5-2	Q3UW32;Q9EST5;Q9EST5-2	Acidic leucine-rich nuclear phosphoprotein 32 family member B	Anp32b
7.63545	7.84091						6	6	6	27.4	27.4	27.4	17.779	0	900210000	13	5	6	5	6	8.53855	8.744	n. def.	n. def.	Q8BP67;Q3UW40;Q8BT08;Q9CS31;F6RSK3	Q8BP67;Q3UW40;Q8BT08;Q9CS31	60S ribosomal protein L24	Rpl24
n. def.	n. def.						1	1	1	6.8	6.8	6.8	27.115	0.0054432	0	1	0	1	0	1	n. def.	n. def.	n. def.	n. def.	Q3UWP6;Q9CRA5	Q3UWP6;Q9CRA5	Golgi phosphoprotein 3	Golph3
5.16125	6.40083						8	8	8	25.6	25.6	25.6	47.382	0	71864000	8	1	8	1	8	6.5926	7.83219	n. def.	n. def.	Q8BK73;Q8BG32;Q5BKQ9;Q3UWW9;Q7TMI0;Q497E8;Q3THG2;G3UYI4;G3UYL3;G3UWW7;G3UYH2;Q8C0Z6;Q8K2N7;G3UZ28;G3UYL8;G3UX15;G3UXL5;G3UX67;G3UWV7	Q8BK73;Q8BG32;Q5BKQ9;Q3UWW9;Q7TMI0;Q497E8;Q3THG2;G3UYI4;G3UYL3;G3UWW7;G3UYH2;Q8C0Z6;Q8K2N7	26S proteasome non-ATPase regulatory subunit 11	Psmd11
n. def.	6.32455						3	3	3	7.2	7.2	7.2	41.058	0	46448000	5	0	3	0	3	n. def.	7.66697	n. def.	n. def.	Q3UX26;Q9DCE5	Q3UX26;Q9DCE5	p21-activated protein kinase-interacting protein 1	Pak1ip1
6.03711	6.3801				TCF4		5	5	5	19.7	19.7	19.7	43.062	0	66285000	9	3	4	3	4	7.31589	7.65886	n. def.	n. def.	Q9CXY6;Q3UXI9	Q9CXY6;Q3UXI9	Interleukin enhancer-binding factor 2	Ilf2
n. def.	5.43775						1	1	1	4.1	4.1	4.1	37.675	0.0060015	5480000	1	0	1	0	1	n. def.	6.73878	n. def.	n. def.	Q3UXN9;Q9DC48	Q3UXN9;Q9DC48	Pre-mRNA-processing factor 17	Cdc40
n. def.	5.46082						1	1	1	6	6	6	33.849	0.0031873	3756400	1	0	1	0	1	n. def.	6.57477	n. def.	n. def.	Q8BJA6;Q91YS8;Q3UY68	Q8BJA6;Q91YS8;Q3UY68	Calcium/calmodulin-dependent protein kinase type 1	Camk1
4.6766	6.58981				OLIG2		17	17	17	23.6	23.6	23.6	124.31	0	247980000	22	1	17	1	17	6.47595	8.38915	n. def.	n. def.	Q9Z103;Q3UYC8;Q6ZQ47;Q5BL11;Q5RKY4	Q9Z103;Q3UYC8;Q6ZQ47;Q5BL11;Q5RKY4	Activity-dependent neuroprotector homeobox protein	Adnp
7.82637	8.20496						15	1	1	41.6	5.2	5.2	50.065	0.00087566	4774500000	59	12	14	0	1	9.1486	9.52718	n. def.	n. def.	Q3UZQ3	Q3UZQ3	Elongation factor 1-alpha	Eef1a1
n. def.	5.10653	+					1	1	1	2	2	2	72.893	1	3195000	0	0	1	0	1	n. def.	6.50447	289	11	Q3UZS1	Q3UZS1		Smg5
3.97132	n. def.	+					1	1	1	2.2	2.2	2.2	71.161	1	234030	1	1	0	1	0	5.36927	n. def.	n. def.	n. def.	Q3V061	Q3V061		4933422H20Rik
5.18837	6.38223						5	5	5	13.3	13.3	13.3	68.199	0	89792000	6	2	4	2	4	6.73243	7.9263	n. def.	n. def.	Q3V0X4;Q9Z2Z9;P47856-2;P47856	Q3V0X4;Q9Z2Z9	Glutamine--fructose-6-phosphate aminotransferase [isomerizing] 2	Gfpt2
n. def.	n. def.	+					1	1	1	2.6	2.6	2.6	46.575	1	0	1	1	0	1	0	n. def.	n. def.	292	354	Q924M7;Q921Z9;Q3V100	Q924M7;Q921Z9;Q3V100	Mannose-6-phosphate isomerase	Mpi
4.71037	5.02796						1	1	1	7.6	7.6	7.6	24.881	0	1579800	2	1	1	1	1	5.71037	6.02796	n. def.	n. def.	Q8R2U5;Q3V4D5	Q8R2U5;Q3V4D5		Naa10
6.89447	7.47615						5	5	5	60.6	60.6	60.6	22.727	0	377750000	8	2	5	2	5	7.89447	8.47615	n. def.	n. def.	Q9DCT8;Q4FJU3;A0A0G2JF37	Q9DCT8;Q4FJU3	Cysteine-rich protein 2	Crip2
6.29092	6.58275						5	5	5	47.3	47.3	47.3	18.521	0	63580000	15	4	5	4	5	7.33232	7.62414	n. def.	n. def.	Q9R0P5;Q4FK36	Q9R0P5;Q4FK36	Destrin	Dstn
6.18755	6.51579						1	1	1	7.8	7.8	7.8	20.699	0	24098000	3	1	1	1	1	6.88653	7.21476	n. def.	n. def.	Q9DCF9-2;Q9DCF9;Q4FK79	Q9DCF9-2;Q9DCF9;Q4FK79	Translocon-associated protein subunit gamma	Ssr3
n. def.	5.69508						2	2	2	4.8	4.8	4.8	54.093	0	12884000	2	0	2	0	2	n. def.	7.11005	n. def.	n. def.	Q4FZF3	Q4FZF3	Probable ATP-dependent RNA helicase DDX49	Ddx49
7.04852	7.46139						12	12	12	30.9	30.9	30.9	50.06	0	962760000	29	9	11	9	11	8.42872	8.84161	n. def.	n. def.	Q9D8N0;Q4FZK2;Q8R1N8	Q9D8N0;Q4FZK2;Q8R1N8	Elongation factor 1-gamma	Eef1g
n. def.	5.99134						2	2	2	8.9	8.9	8.9	38.724	0	21565000	2	0	2	0	2	n. def.	7.33375	n. def.	n. def.	Q9WUK4;Q9D0K3;Q4KL82;Q99K91	Q9WUK4;Q9D0K3;Q4KL82;Q99K91	Replication factor C subunit 2	Rfc2
n. def.	5.81955						2	2	1	5.3	5.3	2.1	61.462	0	14520000	2	0	2	0	1	n. def.	7.16197	n. def.	n. def.	Q4KMN6;Q91XX1	Q4KMN6;Q91XX1		Pcdhgc3
n. def.	5.39278						2	2	2	8	8	8	43.221	0.005988	5929300	1	0	2	0	2	n. def.	6.773	n. def.	n. def.	Q8BP48;Q4VAA9;A0A0G2JF71;Q8R0B2	Q8BP48;Q4VAA9;A0A0G2JF71;Q8R0B2	Methionine aminopeptidase 1;Methionine aminopeptidase	Metap1
n. def.	5.93012						2	2	2	5.1	5.1	5.1	36.595	0.0047393	14473000	2	0	2	0	2	n. def.	7.16056	n. def.	n. def.	Q8K265;Q4VBE8	Q8K265;Q4VBE8	WD repeat-containing protein 18	Wdr18
5.75456	6.84477						12	12	12	24.4	24.4	24.4	82.348	0	317650000	15	4	10	4	10	7.37782	8.46802	n. def.	n. def.	Q8BQ03;Q52KC3;P49718;Q8C2I9	Q8BQ03;Q52KC3;P49718	DNA replication licensing factor MCM5	Mcm5
7.35974	7.88506						5	5	5	54.3	54.3	54.3	8.2038	0	298930000	15	4	5	4	5	7.83686	8.36218	n. def.	n. def.	Q9JJI8;Q52KP0	Q9JJI8;Q52KP0	60S ribosomal protein L38	Rpl38
n. def.	6.21149						2	2	2	11.8	11.8	11.8	26.249	0	14646000	2	0	2	0	2	n. def.	7.16572	n. def.	n. def.	Q921I9;Q542B0	Q921I9;Q542B0	Exosome complex component RRP41	Exosc4
6.15903	n. def.						1	1	1	12.1	12.1	12.1	12.55	0.003276	7211100	1	1	0	1	0	6.858	n. def.	n. def.	n. def.	Q8JZS3;Q62351;Q542D9	Q8JZS3;Q62351;Q542D9	Transferrin receptor protein 1	Tfrc
n. def.	8.93666				OLIG2	+	14	11	9	37.5	36.5	32.5	32.406	0	10372000000	44	1	14	1	9	n. def.	10.0159	n. def.	n. def.	Q9EQW6;Q542S0	Q9EQW6;Q542S0	Oligodendrocyte transcription factor 2	Olig2
6.22097	6.5933						3	2	2	5.9	4.1	4.1	55.979	0	78168000	5	3	3	2	2	7.36709	7.73943	n. def.	n. def.	Q8VE97;Q542V3;Q8K3A8;A0A0A6YWA5	Q8VE97;Q542V3;Q8K3A8	Serine/arginine-rich splicing factor 4	Srsf4
n. def.	6.51441						1	1	1	9.9	9.9	9.9	28.729	0.0058737	49034000	1	0	1	0	1	n. def.	7.6905	n. def.	n. def.	Q9QYB1;Q543N5	Q9QYB1;Q543N5	Chloride intracellular channel protein 4	Clic4
n. def.	6.21149						2	2	2	7.2	7.2	7.2	41.555	0.00084246	24412000	2	0	2	0	2	n. def.	7.3876	n. def.	n. def.	Q9QYF9;Q544I1;Q8VCV2;Q8CBD0	Q9QYF9;Q544I1;Q8VCV2;Q8CBD0	Protein NDRG3	Ndrg3
6.88334	7.48414						11	11	11	45.8	45.8	45.8	33.634	0	533870000	17	4	11	4	11	8.02946	8.63028	n. def.	n. def.	Q8BUM1;Q921F2;Q544R5;A0A087WRZ5;Q8R0B4;C9DT14;Q8BLD4;Q6VYI5;Q6VYI4;A0A087WR97;Q05C33;D2KPZ5;A0A087WQA5;A0A087WRP4;H3BJV1;A0A087WSE4;A0A087WSH7;A0A087WQX8;A0A087WNY6;A0A087WS74;A0A087WS17;A0A087WP57;A0A087WSC6	Q8BUM1;Q921F2;Q544R5;A0A087WRZ5;Q8R0B4;C9DT14;Q8BLD4;Q6VYI5;Q6VYI4;A0A087WR97;Q05C33;D2KPZ5;A0A087WQA5	TAR DNA-binding protein 43	Tardbp
6.05053	5.53193						2	2	2	17.1	17.1	17.1	22.965	0	13174000	3	2	1	2	1	7.00479	6.48618	n. def.	n. def.	Q9R1P1;Q545G0;D3YUM8	Q9R1P1;Q545G0;D3YUM8	Proteasome subunit beta type-3;Proteasome subunit beta type	Psmb3;Gm4950
n. def.	4.60597						2	2	2	7.6	7.6	7.6	50.137	0	524700	2	0	2	0	2	n. def.	5.71991	n. def.	n. def.	Q6P3B7;Q61670;Q549B7;Q80YV1	Q6P3B7;Q61670;Q549B7;Q80YV1	H2.0-like homeobox protein	Hlx
7.61462	7.9343						20	20	20	39.4	39.4	39.4	47.153	0	2034200000	54	16	18	16	18	8.81874	9.13843	n. def.	n. def.	Q9D8E6;Q564E8;Q9CSM5;Q5ZEY2	Q9D8E6;Q564E8;Q9CSM5	60S ribosomal protein L4	Rpl4
n. def.	5.46532						1	1	1	2.7	2.7	2.7	60.927	0.003231	4963300	1	0	1	0	1	n. def.	6.69577	n. def.	n. def.	Q8BY56;Q566J0;Q99KG3-2;Q99KG3-3;Q99KG3	Q8BY56;Q566J0;Q99KG3-2;Q99KG3-3;Q99KG3	RNA-binding protein 10	Rbm10
4.81051	5.56304						3	3	3	4.6	4.6	4.6	106.72	0	22804000	4	1	3	1	3	6.53479	7.28731	n. def.	n. def.	Q8BH74;Q569X8;A0A1W2P7R1;Q3TT06;E9Q4V9;Q3V395	Q8BH74;Q569X8;A0A1W2P7R1;Q3TT06;E9Q4V9	Nuclear pore complex protein Nup107	Nup107
n. def.	5.77729				OLIG2		2	2	2	3.1	3.1	3.1	86.876	0	25749000	2	0	2	0	2	n. def.	7.41076	n. def.	n. def.	Q9D4H8;Q571A2	Q9D4H8;Q571A2	Cullin-2	Cul2
n. def.	n. def.						1	1	1	7.3	7.3	7.3	28.742	0.0053394	0	1	0	1	0	1	n. def.	n. def.	n. def.	n. def.	Q8BPU7-2;Q8BPU7;Q571D6	Q8BPU7-2;Q8BPU7;Q571D6	Engulfment and cell motility protein 1	Elmo1
n. def.	n. def.						1	1	1	1.4	1.4	1.4	64.064	0	0	1	0	1	0	1	n. def.	n. def.	n. def.	n. def.	Q571J5	Q571J5	Zinc finger protein 354C	Znf354c
4.70423	5.03511						2	2	2	4.2	4.2	4.2	58.841	0.00083893	3816700	3	2	1	2	1	6.08443	6.41532	n. def.	n. def.	Q9D554;Q58E59	Q9D554;Q58E59	Splicing factor 3A subunit 3	Sf3a3
9.60843	9.65918						17	1	1	51.5	4.6	4.6	26.301	0	94836000000	253	15	15	1	1	10.6498	10.7006	n. def.	n. def.	Q58EU8;A0A140T8M8	Q58EU8		Igkv1-133
n. def.	4.62206	+					1	1	1	1.4	1.4	1.4	120.66	1	2429400	0	0	1	0	1	n. def.	6.3855	294	572	Q59IW7;Q59IW5;Q59IW6	Q59IW7;Q59IW5;Q59IW6		Abi3bp
n. def.	n. def.	+					1	1	1	1.4	1.4	1.4	136.74	1	0	1	0	1	0	1	n. def.	n. def.	n. def.	n. def.	Q5BL07-2;Q5BL07	Q5BL07-2;Q5BL07	Peroxisome biogenesis factor 1	Pex1
5.48619	7.62293						17	17	17	37.5	37.5	37.5	88.846	0	1395100000	39	2	17	2	17	7.00471	9.14145	n. def.	n. def.	Q62318;Q5EBP9;Q62318-2;Q3UDN8	Q62318;Q5EBP9;Q62318-2;Q3UDN8	Transcription intermediary factor 1-beta	Trim28
n. def.	6.19554						2	2	2	4	4	4	75.656	0	40786000	3	1	2	1	2	n. def.	7.61051	413	603	Q5F2E7;Q5F2E7-2	Q5F2E7;Q5F2E7-2	Nuclear fragile X mental retardation-interacting protein 2	Nufip2
6.34082	6.8168						3	3	3	39.8	39.8	39.8	13.724	0	52502000	7	2	3	2	3	7.11899	7.59494	n. def.	n. def.	Q9CR51;Q5HZY7;Q3U7E0	Q9CR51;Q5HZY7;Q3U7E0	V-type proton ATPase subunit G 1	Atp6v1g1
6.36812	6.95941						5	5	5	28.3	28.3	28.3	16.085	0	102980000	8	4	4	4	4	7.32236	7.91365	n. def.	n. def.	Q9CZX8;Q5M9P3;D3YUT3;D3YUG3;D3Z5R8;D3Z722;S4R223	Q9CZX8;Q5M9P3;D3YUT3;D3YUG3;D3Z5R8;D3Z722	40S ribosomal protein S19	Rps19
n. def.	6.31607				OLIG2		7	7	7	18.8	18.8	18.8	58.1	0	68326000	8	0	7	0	7	n. def.	7.83459	n. def.	n. def.	Q5NBZ1;Q9JMG9;Q5NBY9;Q5NBZ2;Q80XS2;Q5NBY8;Q7TNQ3	Q5NBZ1;Q9JMG9;Q5NBY9;Q5NBZ2;Q80XS2		Patz1
10.6068	10.4752						11	2	2	90.9	25.5	25.5	12.403	0	351540000000	271	11	10	2	2	11.3058	11.1742	n. def.	n. def.	Q5R3X8	Q5R3X8		Igh-3
5.66614	5.57052						3	3	3	5.9	5.9	5.9	94.815	0	30917000	2	2	1	2	1	7.23434	7.13871	298	787	Q5RL55;Q6P542;Q3U6P1;Q99K92	Q5RL55;Q6P542;Q3U6P1	ATP-binding cassette sub-family F member 1	Abcf1
n. def.	4.92247						2	2	2	3.3	3.3	3.3	67.795	0	2258500	2	0	2	0	2	n. def.	6.35382	n. def.	n. def.	Q9EQ61;Q5SQ20	Q9EQ61;Q5SQ20	Pescadillo homolog	Pes1
7.18301	7.69897						8	8	8	36.4	36.4	36.4	29.524	0	782890000	26	7	8	7	8	8.26219	8.77815	n. def.	n. def.	Q5SQB0;Q61937;Q5U438;Q5SQB7;Q9DAY9;Q5BL09;Q5SQB5;Q3U536;Q3UDA7;Q8BSZ3	Q5SQB0;Q61937;Q5U438;Q5SQB7;Q9DAY9;Q5BL09;Q5SQB5;Q3U536;Q3UDA7;Q8BSZ3	Nucleophosmin	Npm1
n. def.	5.47851						1	1	1	5.1	5.1	5.1	22.76	0.0090529	3310600	0	0	1	0	1	n. def.	6.51991	299	2	Q5SQY9	Q5SQY9		Trim37
n. def.	5.07965						2	2	2	1.6	1.6	1.6	155.59	0	6366700	2	0	2	0	2	n. def.	6.80391	n. def.	n. def.	Q5SSZ5;Q5SSZ5-2;Q9DBT6;Q7TPM8;Q3U0Q9;Q7TSV1;Q8CGB6-2;Q8CGB6-4;Q8CGB6;Q8CGB6-3;A0A087WRU0;A0A087WQ94;A0A087WQM0;A0A087WQS0;A0A1D5RM59;E9Q0S6	Q5SSZ5;Q5SSZ5-2;Q9DBT6;Q7TPM8;Q3U0Q9;Q7TSV1;Q8CGB6-2;Q8CGB6-4;Q8CGB6;Q8CGB6-3;A0A087WRU0;A0A087WQ94;A0A087WQM0;A0A087WQS0;A0A1D5RM59;E9Q0S6	Tensin-3;Tensin-like C1 domain-containing phosphatase	Tns3;Tns1;Tenc1
5.15002	5.86237						3	3	3	8.3	8.3	8.3	51.45	0	16524000	6	2	2	2	2	6.42877	7.14114	n. def.	n. def.	Q5SUF2;Q5SUF2-3;Q5SUF2-2	Q5SUF2;Q5SUF2-3;Q5SUF2-2	Luc7-like protein 3	Luc7l3
n. def.	5.10209						1	1	1	3.1	3.1	3.1	58.806	0.0053232	3035900	1	0	1	0	1	n. def.	6.48229	n. def.	n. def.	Q9CQG2-2;Q9CQG2;Q5SW15	Q9CQG2-2;Q9CQG2;Q5SW15	Methyltransferase-like protein 16	Mettl16
6.58743	6.71619	+					4	1	1	22.3	7.9	7.9	22.372	1	136050000	6	3	3	0	1	7.76352	7.89228	n. def.	n. def.	Q5SW88;Q5SW87;Q3UB66;Q0PD67;P62821;Q6ZPF0;Q5SW86;Q91YW0;Q8BKQ0;Q9DD03;Q0PD42;Q0PD50;Q0PD49;P61028;P55258;Q3UHW5;Q8K386;Q3TYH2;Q3TYB1;Q0PD40	Q5SW88;Q5SW87;Q3UB66;Q0PD67;P62821;Q6ZPF0;Q5SW86	Ras-related protein Rab-1A	Rab1;Rab1A
5.62812	6.27593						8	8	6	9.8	9.8	7.3	104.58	0	101750000	13	4	6	4	4	7.27159	7.91939	n. def.	n. def.	Q9DBG3;Q9DBG3-2;Q5SWR1;H3BKM0;H3BIY9	Q9DBG3;Q9DBG3-2;Q5SWR1;H3BKM0;H3BIY9	AP-2 complex subunit beta	Ap2b1
4.58026	5.81159						8	8	8	5	5	5	265.25	0	83015000	11	2	8	2	8	6.66305	7.89438	n. def.	n. def.	Q5SWU9;Q5SWU9-2;E9Q4Z2;D3Z0B3;Q9ESZ3;V9GWS0	Q5SWU9;Q5SWU9-2	Acetyl-CoA carboxylase 1;Biotin carboxylase	Acaca
n. def.	6.62358						4	4	4	20.8	20.8	20.8	36.947	0	58845000	6	0	4	0	4	n. def.	7.76971	n. def.	n. def.	Q5SXC3;Q9Z162;Q5SXC4	Q5SXC3;Q9Z162;Q5SXC4		Vezf1
6.65607	7.28731						45	45	45	29.7	29.7	29.7	191.55	0	2151700000	96	24	42	24	42	8.61031	9.24155	n. def.	n. def.	Q68FD5;Q5SXR6;Q80U89;Q3UPJ3;Q3U0H2;Q3TYQ2;Q3TAN1;Q8K2I5;Q3TJ98;F6Z1R4	Q68FD5;Q5SXR6;Q80U89	Clathrin heavy chain 1	Cltc
n. def.	n. def.	+					1	1	1	2.4	2.4	2.4	56.655	1	0	1	1	0	1	0	n. def.	n. def.	n. def.	n. def.	Q5U465	Q5U465	Coiled-coil domain-containing protein 125	Ccdc125
n. def.	5.11126						1	1	1	2.1	2.1	2.1	90.724	0.00088028	4392700	2	0	1	0	1	n. def.	6.64273	n. def.	n. def.	Q5U4C5;Q8VI75	Q5U4C5;Q8VI75	Importin-4	Ipo4
n. def.	5.28726	+					1	1	1	4.5	4.5	4.5	37.354	1	4069000	0	0	1	0	1	n. def.	6.60949	302	4	Q5UAK0-5	Q5UAK0-5
n. def.	6.22404	+					1	1	1	3.8	3.8	3.8	48.157	1	33501000	0	0	1	0	1	n. def.	7.52506	303	87	Q5VJS4	Q5VJS4		Dyx1c1
5.92571	6.23639						7	7	7	17	17	17	57.229	0	69285000	8	4	5	4	5	7.35708	7.66774	n. def.	n. def.	Q5XJY5;Q3U4S9;Q8R1S6;Q3TDU1;Q8C0G7	Q5XJY5;Q3U4S9;Q8R1S6;Q3TDU1	Coatomer subunit delta	Arcn1
4.80811	5.453						4	4	4	4.7	4.7	4.7	115.42	0	15663000	4	1	3	1	3	6.46132	7.10619	n. def.	n. def.	Q60597-2;Z4YJV4;Q60597;Q60597-4;Q60597-3;Q6P8I7;Q5SVY1;Q5SVY0	Q60597-2;Z4YJV4;Q60597;Q60597-4;Q60597-3;Q6P8I7	2-oxoglutarate dehydrogenase, mitochondrial	Ogdh
5.07617	n. def.						2	2	2	4.9	4.9	4.9	57.086	0.0032389	2740900	2	2	0	2	0	6.43789	n. def.	n. def.	n. def.	Q921L6;Q8BNA5;Q60598	Q921L6;Q8BNA5;Q60598	Src substrate cortactin	Cttn
7.03149	7.57302						9	9	8	37.6	37.6	34.3	32.754	0	674310000	16	4	9	4	8	8.17762	8.71915	n. def.	n. def.	Q60668-3;Q60668;F6ZV59;Q60668-4;G5E8G0;Q60668-2;G3X9W0;E9Q5B6;Q3UXC8;F6SHF3;F7A465	Q60668-3;Q60668;F6ZV59;Q60668-4;G5E8G0;Q60668-2;G3X9W0;E9Q5B6;Q3UXC8	Heterogeneous nuclear ribonucleoprotein D0	Hnrnpd
n. def.	6.37264						1	1	1	4.6	4.6	4.6	25.378	0.00084602	25944000	3	1	1	1	1	n. def.	7.41404	n. def.	n. def.	Q60692	Q60692	Proteasome subunit beta type-6	Psmb6
n. def.	6.41979						2	2	2	13.7	13.7	13.7	29.474	0	34177000	2	0	2	0	2	n. def.	7.53373	n. def.	n. def.	Q9D0E8;Q8CD20;Q61177;Q60737;Q6NSS6;A2ANR6	Q9D0E8;Q8CD20;Q61177;Q60737;Q6NSS6;A2ANR6	Casein kinase II subunit alpha	Csnk2a1
6.37345	5.80486						3	3	3	6.5	6.5	6.5	48.37	0	33010000	4	2	2	2	2	7.41482	6.84625	n. def.	n. def.	Q60749	Q60749	KH domain-containing, RNA-binding, signal transduction-associated protein 1	Khdrbs1
7.66894	7.68833						1	1	1	2.5	2.5	2.5	83.809	0.00089206	2768100000	3	1	1	1	1	9.13133	9.15073	n. def.	n. def.	Q64FW1;Q60841-3;Q60841-2;Q60841	Q64FW1;Q60841-3;Q60841-2;Q60841	Reelin	Reln
6.86622	7.50821						6	1	1	35.7	9.3	9.3	36.007	0	514470000	9	4	5	1	1	7.98016	8.62215	n. def.	n. def.	Q60950	Q60950		Ybx1
4.78591	6.39681						7	7	7	18.2	18.2	18.2	68.494	0	79193000	10	1	7	1	7	6.27727	7.88818	n. def.	n. def.	Q6NZM8;Q60967;Q3TUA8;A0A0G2JFM1;A0A0G2JFK8	Q6NZM8;Q60967;Q3TUA8	Bifunctional 3-phosphoadenosine 5-phosphosulfate synthase 1;Sulfate adenylyltransferase;Adenylyl-sulfate kinase	Papss1
6.63237	7.16029						9	6	6	40.5	36.7	36.7	47.655	0	262540000	21	5	9	3	6	7.77849	8.30643	n. def.	n. def.	Q60972	Q60972	Histone-binding protein RBBP4	Rbbp4
n. def.	5.9691						2	2	1	5.5	5.5	2.9	52.817	0	19558000	2	0	2	0	1	n. def.	7.29132	n. def.	n. def.	Q60996-2;Q6ZQK4;Q60996-3;Q60996-4;Q60996;Q8K5D8;Q99PC9;Q91V89;Q7TNL5;Q6PD28	Q60996-2;Q6ZQK4;Q60996-3;Q60996-4;Q60996;Q8K5D8;Q99PC9;Q91V89;Q7TNL5;Q6PD28	Serine/threonine-protein phosphatase 2A 56 kDa regulatory subunit gamma isoform	Ppp2r5c;Ppp2r5d;Ppp2r5b
n. def.	n. def.	+					1	1	1	0.5	0.5	0.5	404.05	1	0	1	0	1	0	1	n. def.	n. def.	n. def.	n. def.	Q61001	Q61001	Laminin subunit alpha-5	Lama5
7.50293	7.08767						12	3	3	22.2	6.5	6.5	75.167	0	1762900000	31	8	11	0	3	9.105	8.68972	n. def.	n. def.	Q61033	Q61033	Lamina-associated polypeptide 2, isoforms alpha/zeta	Tmpo
6.68358	7.13666						4	4	4	23.7	23.7	23.7	21.778	0	240810000	7	4	4	4	4	7.79752	8.25059	n. def.	n. def.	Q61171;D3Z4A4;Q5M9N9	Q61171;D3Z4A4;Q5M9N9	Peroxiredoxin-2	Prdx2
n. def.	5.72839				NPAS3	+	1	1	1	2	2	2	76.822	0.0032077	17122000	1	0	1	0	1	n. def.	7.23355	n. def.	n. def.	Q61324-2;Q61324	Q61324-2;Q61324	Aryl hydrocarbon receptor nuclear translocator 2	Arnt2
6.11424	n. def.	+					1	1	1	8.2	8.2	8.2	18.332	1	13009000	0	1	0	1	0	7.11424	n. def.	306	4	Q61392	Q61392		ORF 1
n. def.	5.70023				OLIG2		3	3	3	9	9	9	55.057	0	16046000	5	1	2	1	2	n. def.	7.20537	n. def.	n. def.	Q68FH8;Q61466-2;Q61466	Q68FH8;Q61466-2;Q61466	SWI/SNF-related matrix-associated actin-dependent regulator of chromatin subfamily D member 1	Smarcd1
6.72822	6.8084						6	3	3	28.1	22.3	22.3	29.313	0	153150000	10	4	5	2	3	7.84216	7.92234	n. def.	n. def.	Q64369;Q9JKB3-2;Q68G78;Q61478;Q9JKB3;Q8BPG0	Q64369;Q9JKB3-2;Q68G78;Q61478;Q9JKB3	Y-box-binding protein 3	Igf2bp3;Ybx3
5.96427	n. def.						1	1	1	7.6	7.6	7.6	46.321	0.0054475	18421000	1	1	0	1	0	7.26531	n. def.	n. def.	n. def.	Q61530	Q61530
6.88338	7.49809						15	15	15	43.6	43.6	43.6	54.507	0	1095600000	27	9	15	9	15	8.33054	8.94524	n. def.	n. def.	Q61553;A0A0G2JDU7;F7BDR1	Q61553;A0A0G2JDU7	Fascin	Fscn1
n. def.	n. def.	+					1	1	1	10.6	10.6	10.6	16.119	1	0	1	1	0	1	0	n. def.	n. def.	n. def.	n. def.	Q61640	Q61640		H2-D4
n. def.	5.48622						2	2	2	7.9	7.9	7.9	53.932	0	8577800	3	0	2	0	2	n. def.	6.93338	n. def.	n. def.	Q61655;Q8R3C7;Q8BZY3	Q61655;Q8R3C7;Q8BZY3	ATP-dependent RNA helicase DDX19A	Ddx19a;Ddx19b
7.25193	7.66426						19	19	14	38.3	38.3	29.6	69.289	0	2048700000	46	15	16	10	13	8.75707	9.16941	n. def.	n. def.	Q61656;Q8BTS0;Q3UXW3;A1L333;Q5U222;Q3V0Z8;S4R1I6;Q9CSD9;B1ARC0;O35662;B1ARB9;S4R1E3;Q921Y3	Q61656;Q8BTS0;Q3UXW3;A1L333;Q5U222;Q3V0Z8;S4R1I6	Probable ATP-dependent RNA helicase DDX5	Ddx5
6.65033	7.20529						5	4	4	27.2	20.9	20.9	22.186	0	205130000	11	4	5	3	4	7.65033	8.20529	n. def.	n. def.	Q61686	Q61686	Chromobox protein homolog 5	Cbx5
n. def.	5.60321						5	5	5	2.5	2.5	2.5	278.58	0	47325000	3	0	5	0	5	n. def.	7.67509	n. def.	n. def.	Q61687;Q3TSV4;Q3UZ76;Q3UY26;Q8C2S3;A0A0G2JFA5;Q8BSH0;F6RDB7	Q61687	Transcriptional regulator ATRX	Atrx
n. def.	n. def.	+					1	1	1	2.3	2.3	2.3	57.624	1	0	2	1	1	1	1	n. def.	n. def.	310	12	Q61749	Q61749	Translation initiation factor eIF-2B subunit delta	Eif2b4
6.707	7.09377						10	10	10	31	31	31	56.585	0	385080000	17	7	9	7	9	8.04941	8.43621	n. def.	n. def.	Q61753;F6ZSB7	Q61753	D-3-phosphoglycerate dehydrogenase	Phgdh
5.28932	5.5237						6	6	6	9	9	9	109.55	0	31718000	10	4	5	4	5	7.06748	7.30185	n. def.	n. def.	Q61768;Q3UWI9;Q8CFE7;Q6NSS5;Q05CG8;E9QAK5;O70402;Q3US62;Q05CD7;Q3TY51;P28738;Q8CHF1;P33175	Q61768;Q3UWI9;Q8CFE7;Q6NSS5;Q05CG8;E9QAK5	Kinesin-1 heavy chain	Kif5b
6.22487	n. def.						2	2	2	12.6	12.6	12.6	24.899	0.0024855	20140000	1	2	0	2	0	7.30406	n. def.	n. def.	n. def.	V9GXM7;V9GXE0;Q61884	V9GXM7;V9GXE0;Q61884	Meiosis-specific nuclear structural protein 1	Mns1
n. def.	5.11787						1	1	1	4.1	4.1	4.1	40.563	0.0083682	2754700	0	0	1	0	1	n. def.	6.44007	n. def.	n. def.	Q61891	Q61891		H2-D1
n. def.	n. def.						2	2	2	6.1	6.1	6.1	52.912	0.0084388	0	2	1	1	1	1	n. def.	n. def.	n. def.	n. def.	Q62056	Q62056		Psg17
6.28323	5.88551						2	2	2	10.4	10.4	10.4	25.476	0	24192000	6	2	2	2	2	7.23749	6.83975	n. def.	n. def.	Q62093;Q8C671	Q62093;Q8C671	Serine/arginine-rich splicing factor 2	Srsf2
7.12616	6.94499				OLIG2		20	20	19	21.8	21.8	20.8	130.71	0	998150000	45	18	14	17	13	8.77937	8.5982	314	932	Q62255-2;Q62255;Q9ER74;Q6P5E3;Q9EPW7	Q62255-2;Q62255	Sal-like protein 3	Sall3
4.38068	5.63283						6	6	6	4.4	4.4	4.4	274.22	0	64382000	9	2	6	2	6	6.53296	7.78512	n. def.	n. def.	Q62261;A0A0A0MQG2;Q62261-2;Q8BQ35;Q5DTR4;Q3TZN6;Q8R1C2;Q3TTX2	Q62261;A0A0A0MQG2;Q62261-2;Q8BQ35;Q5DTR4	Spectrin beta chain, non-erythrocytic 1	Sptbn1
n. def.	4.97347						1	1	1	4.6	4.6	4.6	48.341	0.005814	1881500	1	0	1	0	1	n. def.	6.2745	n. def.	n. def.	Q62418-3;Q62418-2;Q62418	Q62418-3;Q62418-2;Q62418	Drebrin-like protein	Dbnl
n. def.	5.38718						1	1	1	3.1	3.1	3.1	42.619	0.0060332	4877700	1	0	1	0	1	n. def.	6.68822	n. def.	n. def.	Q78ZM1;Q64104	Q78ZM1;Q64104	Nuclear receptor subfamily 2 group E member 1	Nr2e1
n. def.	5.17992						3	3	3	5.4	5.4	5.4	112.84	0	8474600	3	0	3	0	3	n. def.	6.92812	n. def.	n. def.	Q64127-2;Q64127	Q64127-2;Q64127	Transcription intermediary factor 1-alpha	Trim24
5.14507	6.6045						17	11	11	13.2	9.4	9.4	181.91	0	362110000	26	4	17	1	11	7.08461	8.54402	n. def.	n. def.	Q64511;Q8BRY5;Q3TR62;F6XX57	Q64511	DNA topoisomerase 2-beta	Top2b
4.43509	4.77014						1	1	1	2	2	2	116.72	0.0059215	6460200	2	1	1	1	1	6.31016	6.6452	n. def.	n. def.	Q64727	Q64727	Vinculin	Vcl
5.23035	5.51561						1	1	1	2.2	2.2	2.2	66.323	0.00088968	16924000	2	1	1	1	1	6.76183	7.04708	n. def.	n. def.	Q68FC6;Q6ZQL4	Q68FC6;Q6ZQL4	WD repeat-containing protein 43	Wdr43
n. def.	5.80572						2	2	2	2.5	2.5	2.5	114.22	0.0054816	30688000	2	0	2	0	2	n. def.	7.48697	n. def.	n. def.	Q68FE9	Q68FE9	Teashirt homolog 2	Tshz2
n. def.	5.19324						1	1	1	1.5	1.5	1.5	121.58	0	7490000	2	0	1	0	1	n. def.	6.87448	n. def.	n. def.	Q69Z96;Q9EPE9	Q69Z96;Q9EPE9	Probable cation-transporting ATPase 13A1	Atp13a1
n. def.	4.3533	+					1	1	1	1.1	1.1	1.1	136.23	1	1443700	0	0	1	0	1	n. def.	6.15948	315	498	Q69ZW3-2;Q69ZW3	Q69ZW3-2;Q69ZW3	EH domain-binding protein 1	Ehbp1
n. def.	5.67403						4	4	4	5.3	5.3	5.3	110.33	0	23133000	4	0	4	0	4	n. def.	7.36423	n. def.	n. def.	Q6PCN6;Q69ZX6;Q8C5W4-2;Q8C5W4;Q0VAW0	Q6PCN6;Q69ZX6	MORC family CW-type zinc finger protein 2A	Morc2a
n. def.	n. def.	+					1	1	1	2.2	2.2	2.2	77.63	1	0	1	1	0	1	0	n. def.	n. def.	n. def.	n. def.	Q69ZX8	Q69ZX8	Actin-binding LIM protein 3	Ablim3
5.62143	n. def.						2	2	2	4.9	4.9	4.9	77.84	0	13802000	3	2	0	2	0	7.13994	n. def.	n. def.	n. def.	Q6A022;Q8BJS4-3;Q8BJS4-2;Q8BJS4;Q4QQM3	Q6A022;Q8BJS4-3;Q8BJS4-2;Q8BJS4;Q4QQM3	SUN domain-containing protein 2	Sun2
n. def.	4.5938						1	1	1	1.4	1.4	1.4	140.03	0	2276200	2	0	1	0	1	n. def.	6.35721	n. def.	n. def.	Q6A0A1;Q80X98	Q6A0A1;Q80X98		Dhx38
4.77197	5.861						7	7	7	9.6	9.6	9.6	121.64	0	44759000	7	1	6	1	6	6.52785	7.61687	n. def.	n. def.	Q6A0A9;Q3V3S0	Q6A0A9	Constitutive coactivator of PPAR-gamma-like protein 1	FAM120A
n. def.	5.62976						2	2	2	7.7	7.7	7.7	34.934	0.0047431	5968700	1	0	2	0	2	n. def.	6.77588	n. def.	n. def.	Q9CRD2;Q6A0D1	Q9CRD2;Q6A0D1	ER membrane protein complex subunit 2	Emc2
n. def.	5.93049						4	4	4	7.7	7.7	7.7	104.17	0	34084000	3	0	4	0	4	n. def.	7.53255	n. def.	n. def.	Q6P2B1;Q6DI95;Q6P2B1-2;Q571K5;F6TDZ2;Q3UL39;A0A0U1RQ41;Q6P2B1-3;Q8K368	Q6P2B1;Q6DI95;Q6P2B1-2;Q571K5;F6TDZ2;Q3UL39	Transportin-3	Tnpo3
6.04044	5.66768						2	2	2	4.4	4.4	4.4	28.467	0	23443000	3	2	1	2	1	7.21654	6.84376	n. def.	n. def.	Q6IRU2	Q6IRU2	Tropomyosin alpha-4 chain	Tpm4
n. def.	3.98367						1	1	1	0.4	0.4	0.4	303.76	0.0071327	1165400	1	0	1	0	1	n. def.	6.06648	n. def.	n. def.	Q6KCD5-2;Q6KCD5	Q6KCD5-2;Q6KCD5	Nipped-B-like protein	Nipbl
n. def.	4.71441						4	4	4	2.9	2.9	2.9	207.78	0	4870000	3	0	4	0	4	n. def.	6.68753	n. def.	n. def.	Q6NS46;Q3TUH3	Q6NS46	Protein RRP5 homolog	Pdcd11
6.12551	n. def.	+					1	1	1	1.1	1.1	1.1	118.56	1	64085000	2	1	0	1	0	7.80676	n. def.	318	167	Q6NZM9	Q6NZM9	Histone deacetylase 4	Hdac4
4.36325	5.82594						11	11	11	8.1	8.1	8.1	244.54	0	81760000	14	2	11	2	11	6.43514	7.89782	n. def.	n. def.	Q6P4T2;Q8BYH6;Q7TMG2	Q6P4T2	U5 small nuclear ribonucleoprotein 200 kDa helicase	Snrnp200
4.86757	6.28262						19	19	19	13.2	13.2	13.2	225.65	0	224950000	23	3	19	3	19	6.92065	8.3357	n. def.	n. def.	Q6P5D8	Q6P5D8	Structural maintenance of chromosomes flexible hinge domain-containing protein 1	Smchd1
5.32709	6.48644						10	10	10	12.4	12.4	12.4	123.09	0	173700000	9	1	9	1	9	7.05138	8.21072	n. def.	n. def.	Q6P5F9;F6YA11;Q921J0;A2AKT6	Q6P5F9	Exportin-1	Xpo1
5.72846	6.01732						8	8	8	5.9	5.9	5.9	201.77	0	135530000	13	5	6	5	6	7.66296	7.95184	n. def.	n. def.	Q6P5H2-2;Q6P5H2	Q6P5H2-2;Q6P5H2	Nestin	Nes
n. def.	5.38993						1	1	1	2.1	2.1	2.1	76.843	0.003218	6135800	1	0	1	0	1	n. def.	6.78787	n. def.	n. def.	Q6P9S0	Q6P9S0	MTSS1-like protein	Mtss1l
n. def.	5.55912				TCF4		4	4	4	3.6	3.6	3.6	168.08	0	25001000	5	0	4	0	4	n. def.	7.39796	n. def.	n. def.	Q6PAL7	Q6PAL7	AT-hook DNA-binding motif-containing protein 1	Ahdc1
n. def.	n. def.						1	1	1	1.3	1.3	1.3	156.61	0	0	1	0	1	0	1	n. def.	n. def.	n. def.	n. def.	Q6PB66	Q6PB66	Leucine-rich PPR motif-containing protein, mitochondrial	Lrpprc
n. def.	n. def.	+					1	1	1	8.6	8.6	8.6	28.228	1	0	1	1	0	1	0	n. def.	n. def.	319	147	Q6PCQ0-3;Q6PCQ0-2;Q6PCQ0	Q6PCQ0-3;Q6PCQ0-2;Q6PCQ0	IQ domain-containing protein E	Iqce
n. def.	5.21307						2	2	2	1.4	1.4	1.4	203.91	0	15353000	2	0	2	0	2	n. def.	7.18619	n. def.	n. def.	Q6PDI5-2;Q6PDI5;Q8C2Z1;A2ALV8;A2ALV6;A2ALV7	Q6PDI5-2;Q6PDI5;Q8C2Z1;A2ALV8;A2ALV6;A2ALV7	Proteasome-associated protein ECM29 homolog	Ecm29;AI314180
5.87653	6.70013						5	5	5	27.4	27.4	27.4	39.275	0	86488000	7	1	5	1	5	7.05262	7.87622	n. def.	n. def.	Q6PE01;Q3UFK4	Q6PE01;Q3UFK4	U5 small nuclear ribonucleoprotein 40 kDa protein	Snrnp40
4.60831	4.76471	+					1	1	1	2.5	2.5	2.5	46.297	1	2962500	0	1	1	1	1	6.08543	6.24182	320	355	Q6PEV3	Q6PEV3	WAS/WASL-interacting protein family member 2	Wipf2
n. def.	8.72518					+	9	4	4	17.9	9.2	9.2	29.506	0	6373300000	33	0	9	0	4	n. def.	9.80436	n. def.	n. def.	Q6PFG8	Q6PFG8	Oligodendrocyte transcription factor 3	Olig3
n. def.	5.0703						1	1	1	1.7	1.7	1.7	105.78	0.0053929	3762300	1	0	1	0	1	n. def.	6.57545	n. def.	n. def.	Q8K0N8;Q6PGF5;Q6ZQH0	Q8K0N8;Q6PGF5;Q6ZQH0		Bms1
7.48656	7.8119						11	11	11	41.8	41.8	41.8	21.423	0	859570000	33	10	10	10	10	8.4408	8.76615	n. def.	n. def.	Q9CPR4;Q6ZWZ7;Q6PHZ1;Q505B1;Q80V08;B2RY53	Q9CPR4;Q6ZWZ7;Q6PHZ1;Q505B1;Q80V08	60S ribosomal protein L17	Rpl17
n. def.	n. def.	+					1	1	1	3.2	3.2	3.2	37.547	1	0	1	1	0	1	0	n. def.	n. def.	321	264	Q6U7R4	Q6U7R4	T-cell immunoglobulin and mucin domain-containing protein 4	Timd4
5.80578	5.72652						6	6	6	7	7	7	134.19	0	73845000	10	3	5	3	5	7.60512	7.52586	n. def.	n. def.	Q8BMJ2;Q7TSZ3;Q6ZPT2;Q9CQM4;Q99JK2	Q8BMJ2;Q7TSZ3;Q6ZPT2	Leucine--tRNA ligase, cytoplasmic	Lars
n. def.	n. def.	+					1	1	1	3.5	3.5	3.5	69.555	1	0	1	1	0	1	0	n. def.	n. def.	n. def.	n. def.	Q6ZQ14;Q922E6	Q6ZQ14;Q922E6	FAST kinase domain-containing protein 2	Fastkd2
5.94593	n. def.	+					1	1	1	1.8	1.8	1.8	87.518	1	38849000	0	1	0	1	0	7.58938	n. def.	326	58	Q6ZQ18-2;Q6ZQ18	Q6ZQ18-2;Q6ZQ18	Protein EFR3 homolog B	Efr3b
5.77559	6.65228						12	12	12	11.9	11.9	11.9	136.33	0	315380000	16	3	12	3	12	7.56798	8.44467	n. def.	n. def.	Q6ZQ38;Q3UMI9;D3YWC5	Q6ZQ38	Cullin-associated NEDD8-dissociated protein 1	Cand1
n. def.	4.96767						1	1	1	2.2	2.2	2.2	121.15	0.0032154	5383900	1	0	1	0	1	n. def.	6.7311	n. def.	n. def.	Z4YJT3;Q6ZQ58	Z4YJT3;Q6ZQ58	La-related protein 1	Larp1
n. def.	4.85823						1	1	1	2.2	2.2	2.2	89.436	0.0058651	2741600	1	0	1	0	1	n. def.	6.438	n. def.	n. def.	Q6ZQC8	Q6ZQC8		Ttc37
n. def.	n. def.						1	1	1	8.6	8.6	8.6	18.98	0	0	1	0	1	0	1	n. def.	n. def.	n. def.	n. def.	Q8K1A2;Q6ZQH1;Q9CZ15	Q8K1A2;Q6ZQH1;Q9CZ15	DNA replication complex GINS protein PSF1	Gins1
n. def.	5.02975						2	2	2	8	8	8	70.843	0	4069300	3	0	2	0	2	n. def.	6.60952	n. def.	n. def.	Q6ZQH4;Q91YK2	Q6ZQH4;Q91YK2	Ribosomal RNA processing protein 1 homolog B	Rrp1b
n. def.	4.99817						3	3	3	2.4	2.4	2.4	196.69	0	8364700	3	0	3	0	3	n. def.	6.92245	n. def.	n. def.	Q6ZQH8;F2Z4A7;J3JSA4;F7BCN9;A2AWI5	Q6ZQH8	Nucleoporin NUP188 homolog	Nup188
n. def.	5.76299						2	2	2	8.6	8.6	8.6	32.342	0.0060196	9270600	2	1	1	1	1	n. def.	6.96711	n. def.	n. def.	Q6ZQI3	Q6ZQI3	Malectin	Mlec
7.63014	7.98762						14	14	14	40.7	40.7	40.7	22.591	0	1538500000	28	11	12	11	12	8.67154	9.02902	n. def.	n. def.	Q6ZWN5;F7CJS8;D3YWH9;Q96EC0;Q9CXW7;D3Z673;D3YUV6	Q6ZWN5;F7CJS8;D3YWH9;Q96EC0;Q9CXW7	40S ribosomal protein S9	Rps9
7.86803	8.01085						5	5	5	30.1	30.1	30.1	14.552	0	528990000	11	5	4	5	4	8.34514	8.48799	n. def.	n. def.	Q6ZWV7;G3UWD7	Q6ZWV7	60S ribosomal protein L35	Rpl35
6.08486	6.31298						6	6	6	15.6	15.6	15.6	36.108	0	71975000	11	4	5	4	5	7.42728	7.6554	n. def.	n. def.	Q6ZWX6;Q9CV24	Q6ZWX6;Q9CV24	Eukaryotic translation initiation factor 2 subunit 1	Eif2s1
7.68958	8.04254						5	3	3	40.5	15.5	15.5	9.4771	0	636880000	16	5	5	3	3	8.29164	8.64459	n. def.	n. def.	Q6ZWY3;D6RH49;D3YYB0	Q6ZWY3;D6RH49;D3YYB0	40S ribosomal protein S27-like;40S ribosomal protein S27	Rps27l
5.69602	6.35426						3	3	3	9	9	9	65.209	0	88238000	5	1	3	1	3	7.20118	7.85941	n. def.	n. def.	Q8C2E1;Q7TMX2;Q76MZ3	Q8C2E1;Q7TMX2;Q76MZ3	Serine/threonine-protein phosphatase 2A 65 kDa regulatory subunit A alpha isoform	Ppp2r1a
6.15427	6.52434						1	1	1	8.1	8.1	8.1	16.815	0	28626000	2	1	1	1	1	6.93241	7.3025	n. def.	n. def.	Q78XF5	Q78XF5	Oligosaccharyltransferase complex subunit OSTC	Ostc
7.69276	8.09594						27	7	1	62.5	24.3	2.7	49.906	0	3480200000	84	19	26	1	1	8.99379	9.39697	n. def.	n. def.	Q7TMM9	Q7TMM9	Tubulin beta-2A chain	Tubb2a
n. def.	n. def.						1	1	1	3.4	3.4	3.4	31.825	0.0024958	0	1	0	1	0	1	n. def.	n. def.	n. def.	n. def.	Q9D0M0;Q7TMX6	Q9D0M0;Q7TMX6	Exosome complex exonuclease RRP42	Exosc7
n. def.	5.98472						1	1	1	5.7	5.7	5.7	25.921	0.0047244	11585000	1	0	1	0	1	n. def.	7.0639	n. def.	n. def.	Q7TNE3	Q7TNE3	Sperm-associated antigen 7	Spag7
n. def.	6.08938						2	2	2	5.6	5.6	5.6	66.841	0.00088261	27027000	1	0	2	0	2	n. def.	7.4318	n. def.	n. def.	Q7TNK1-3;Q7TNK1-2;Q7TNK1	Q7TNK1-3;Q7TNK1-2;Q7TNK1	Transcription factor RFX4	Rfx4
n. def.	n. def.	+					1	1	1	6.6	6.6	6.6	35.626	1	0	1	0	1	0	1	n. def.	n. def.	327	291	Q7TRV8	Q7TRV8		Olfr452
n. def.	n. def.	+					1	1	1	8.7	8.7	8.7	13.259	1	0	1	0	1	0	1	n. def.	n. def.	328	8	Q8BXZ8;Q7TS68	Q8BXZ8;Q7TS68	Putative methyltransferase NSUN6	Nsun6
n. def.	5.38759	+					1	1	1	1.4	1.4	1.4	105.9	1	11229000	1	0	1	0	1	n. def.	7.05034	329	544	Q7TSG1-2;Q7TSG1	Q7TSG1-2;Q7TSG1	Centrosomal protein of 120 kDa	Cep120
n. def.	6.78794				OLIG2		5	5	5	13.6	13.6	13.6	56.536	0	147280000	4	0	5	0	5	n. def.	8.16814	n. def.	n. def.	Q7TSZ8	Q7TSZ8	Nucleus accumbens-associated protein 1	Nacc1
n. def.	5.51114						1	1	1	1.4	1.4	1.4	149.58	0.0064888	19467000	1	0	1	0	1	n. def.	7.2893	n. def.	n. def.	Q7TT37	Q7TT37	Elongator complex protein 1	Ikbkap
n. def.	5.93445						2	2	2	3.8	3.8	3.8	58.951	0.0053313	22357000	1	0	2	0	2	n. def.	7.34941	n. def.	n. def.	Q80SW1;Q3TSQ0;Q80WX1;H3BKT5;Q80TQ9;Q68FL4-2;F8WI65;F8WGT1;Q68FL4	Q80SW1;Q3TSQ0;Q80WX1;H3BKT5;Q80TQ9;Q68FL4-2;F8WI65;F8WGT1;Q68FL4	Putative adenosylhomocysteinase 2;Adenosylhomocysteinase;Putative adenosylhomocysteinase 3	Ahcyl1;Ahcyl2
n. def.	5.61691						3	3	3	6.9	6.9	6.9	59.418	0	9106000	3	0	3	0	3	n. def.	6.95933	n. def.	n. def.	Q80TE5;Q9ERR8;Q8C7A0	Q80TE5;Q9ERR8;Q8C7A0	Zinc finger protein 319	Zfp319;Znf319
5.01406	n. def.						1	1	1	3.3	3.3	3.3	41.551	0	1859100	2	1	1	1	1	6.2693	n. def.	n. def.	n. def.	Q9CYH6;Q80U76	Q9CYH6;Q80U76	Ribosome biogenesis regulatory protein homolog	Rrs1
n. def.	5.28181						1	1	1	2.8	2.8	2.8	42.295	0.0096286	3061500	1	0	1	0	1	n. def.	6.48593	n. def.	n. def.	Q9R0N0;Q9CXZ9;Q9CWW5;Q80UL3	Q9R0N0;Q9CXZ9;Q9CWW5;Q80UL3	Galactokinase	Galk1
5.58324	6.15521						2	2	2	5.8	5.8	5.8	45.349	0	36252000	4	2	2	2	2	6.88428	7.45624	n. def.	n. def.	Q80VD1	Q80VD1	Protein FAM98B	Fam98b
5.42698	6.2159						4	4	4	8.3	8.3	8.3	63.845	0	45872000	4	1	3	1	3	6.8072	7.59612	n. def.	n. def.	Q80WJ7;E9PUX0;F6QHD1;F6ZQL0;F6QFT1;Q3TAB3;F6ZSG0	Q80WJ7;E9PUX0;F6QHD1;F6ZQL0;F6QFT1	Protein LYRIC	Mtdh
4.50192	n. def.	+					1	1	1	2.1	2.1	2.1	58.682	1	825850	0	1	0	1	0	5.9169	n. def.	330	241	Q80XE1;Q80XE1-1	Q80XE1;Q80XE1-1	Synembryn-B	Ric8b
n. def.	6.19279	+					1	1	1	1.9	1.9	1.9	67.251	1	40528000	1	0	1	0	1	n. def.	7.60776	n. def.	n. def.	Q80XU8	Q80XU8	Leucine-rich repeat and fibronectin type-III domain-containing protein 4	Lrfn4
n. def.	5.73819	+					1	1	1	4.8	4.8	4.8	18.912	1	3830700	0	0	1	0	1	n. def.	6.58328	333	135	Q9D5Z9;Q80Y73	Q9D5Z9;Q80Y73	UPF0722 protein C11orf88 homolog	4833427G06Rik
n. def.	n. def.	+					1	1	1	2.1	2.1	2.1	100.67	1	0	1	0	1	0	1	n. def.	n. def.	n. def.	n. def.	Q80ZX8	Q80ZX8	Sperm-associated antigen 1	Spag1
n. def.	5.98743						4	4	4	7	7	7	89.141	0	39831000	4	0	4	0	4	n. def.	7.60022	n. def.	n. def.	Q810A7-2;Q810A7	Q810A7-2;Q810A7	ATP-dependent RNA helicase DDX42	Ddx42
4.72499	n. def.	+					1	1	1	0.5	0.5	0.5	229.72	1	5414800	1	1	0	1	0	6.73358	n. def.	n. def.	n. def.	Q811P8	Q811P8	Rho GTPase-activating protein 32	Arhgap32
5.87682	6.26347						4	4	4	12	12	12	47.222	0	75034000	6	1	3	1	3	7.33921	7.72587	n. def.	n. def.	Q8BFR5-2;Q8BFR5;A0A0U1RNQ6	Q8BFR5-2;Q8BFR5	Elongation factor Tu, mitochondrial	Tufm
5.82321	6.58112						5	5	5	6.6	6.6	6.6	101.31	0	183570000	6	1	5	1	5	7.436	8.1939	n. def.	n. def.	Q8BFY9-2;Q8BFY9;Q3TKD0;Q3TQW0;Q3TS78;Q99LG2;J3QMX2;Q3U316;Q3U1S0;E9PV58	Q8BFY9-2;Q8BFY9;Q3TKD0	Transportin-1	Tnpo1
7.80855	8.01974	+					6	1	1	25.5	4.8	4.8	42.004	1	3549000000	29	5	6	1	1	9.13078	9.34197	n. def.	n. def.	Q8BFZ3	Q8BFZ3	Beta-actin-like protein 2	Actbl2
5.74451	6.27894						3	3	3	10.6	10.6	10.6	37.872	0	51578000	7	2	3	2	3	7.06674	7.60117	n. def.	n. def.	Q8BFZ9;Q91X78;A0A0R4J1G5;A0A1B0GRG7;A0A1B0GT43;E9PUH5;A0A1B0GRQ1;A0A1B0GQZ0;A0A1B0GSD8;A0A1B0GT70	Q8BFZ9;Q91X78;A0A0R4J1G5	Erlin-2;Erlin-1	Erlin2;Erlin1
5.56242	6.30557						6	6	6	16	16	16	51.863	0	71583000	7	2	6	2	6	7.03953	7.78268	n. def.	n. def.	Q8BGH2	Q8BGH2	Sorting and assembly machinery component 50 homolog	Samm50
n. def.	5.66886						2	2	2	11	11	11	34.424	0	5598100	2	0	2	0	2	n. def.	6.74804	n. def.	n. def.	Q8BGS0-2;Q8BGS0	Q8BGS0-2;Q8BGS0	Protein MAK16 homolog	Mak16
n. def.	n. def.	+					1	1	1	2.5	2.5	2.5	72.878	1	0	1	1	0	1	0	n. def.	n. def.	n. def.	n. def.	Q8BGT1	Q8BGT1		Flrt3
n. def.	5.36646						2	2	2	6.7	6.7	6.7	57.943	0	6045500	3	0	2	0	2	n. def.	6.78143	n. def.	n. def.	Q8BGT5	Q8BGT5	Alanine aminotransferase 2	Gpt2
n. def.	5.60133						2	2	2	6.9	6.9	6.9	55.392	0	10782000	1	0	2	0	2	n. def.	7.0327	n. def.	n. def.	Q8BGW1-2;Q8BGW1;E9Q1E4;Q8BGW1-4;Q8BGW1-3	Q8BGW1-2;Q8BGW1;E9Q1E4;Q8BGW1-4;Q8BGW1-3	Alpha-ketoglutarate-dependent dioxygenase FTO	Fto
n. def.	5.21588	+					1	1	1	4.6	4.6	4.6	50.459	1	4274200	1	0	1	0	1	n. def.	6.63085	338	151	Q8BGZ3	Q8BGZ3	DDB1- and CUL4-associated factor 12	Dcaf12
n. def.	n. def.						2	2	2	2.9	2.9	2.9	105.77	0.0031898	0	2	0	2	0	2	n. def.	n. def.	n. def.	n. def.	Q8BHB4;H3BJD8;H3BLC1	Q8BHB4;H3BJD8;H3BLC1	WD repeat-containing protein 3	Wdr3
n. def.	6.42459				OLIG2		6	6	6	18.1	18.1	18.1	55.66	0	58479000	5	0	6	0	6	n. def.	7.767	n. def.	n. def.	Q8BHJ5;A0A0J9YV90;Q9QXE7;A0A0J9YUT9;A0A0J9YUE3	Q8BHJ5;A0A0J9YV90;Q9QXE7	F-box-like/WD repeat-containing protein TBL1XR1;F-box-like/WD repeat-containing protein TBL1X	Tbl1xr1;Tbl1x
n. def.	5.74166						2	2	2	6.4	6.4	6.4	46.895	0.00087873	12136000	2	0	2	0	2	n. def.	7.08408	n. def.	n. def.	Q8BHS3	Q8BHS3	Pre-mRNA-splicing factor RBM22	Rbm22
n. def.	6.05683						4	3	3	13.9	11.1	11.1	37.342	0	20516000	5	0	4	0	3	n. def.	7.31209	n. def.	n. def.	Q8BHZ0	Q8BHZ0	Protein FAM49A	Fam49a
4.50235	5.75954						2	2	2	4.8	4.8	4.8	59.744	0	19412000	3	1	2	1	2	6.00749	7.26468	n. def.	n. def.	Q8BI72	Q8BI72	CDKN2A-interacting protein	Cdkn2aip
5.67523	n. def.						1	1	1	1.4	1.4	1.4	86.226	0.00085179	18463000	1	1	0	1	0	7.2663	n. def.	n. def.	n. def.	Q8BI87;Q8K083	Q8BI87;Q8K083	Zinc finger protein 536	Zfp536;Znf536
5.33274	6.03274						9	9	9	14	14	14	93.28	0	65965000	15	3	9	3	9	7.04033	7.7403	n. def.	n. def.	Q8BJ71;Q3TFC8;Q8BJ71-2;A0A1D5RLQ0	Q8BJ71;Q3TFC8;Q8BJ71-2;A0A1D5RLQ0	Nuclear pore complex protein Nup93	Nup93
n. def.	5.07958						2	2	2	4.1	4.1	4.1	87.125	0	5525000	2	0	2	0	2	n. def.	6.74233	n. def.	n. def.	Q8BJL0-2;Q8BJL0;D3Z0J8;D3YUX5;Q8BJL0-4;Q8BJL0-3	Q8BJL0-2;Q8BJL0;D3Z0J8;D3YUX5;Q8BJL0-4;Q8BJL0-3	SWI/SNF-related matrix-associated actin-dependent regulator of chromatin subfamily A-like protein 1	Smarcal1
5.79	5.61892						6	6	6	13.4	13.4	13.4	64.403	0	32005000	8	4	3	4	3	7.28135	7.11029	n. def.	n. def.	Q8BJW6;Q8BJW6-2;D6RFN2;D6RGA6	Q8BJW6;Q8BJW6-2	Eukaryotic translation initiation factor 2A	Eif2a
5.56329	5.81328						2	2	2	9	9	9	22.906	0	10164000	2	1	1	1	1	6.56329	6.81328	n. def.	n. def.	Q9R1P3;Q8BJX0	Q9R1P3;Q8BJX0	Proteasome subunit beta type-2;Proteasome subunit beta type	Psmb2
n. def.	4.9352						1	1	1	1.8	1.8	1.8	55.971	0.0008569	2239700	1	0	1	0	1	n. def.	6.35019	n. def.	n. def.	Q8BJY1	Q8BJY1	26S proteasome non-ATPase regulatory subunit 5	Psmd5
6.55049	6.92818						12	12	12	31.9	31.9	31.9	55.983	0	324750000	21	8	10	8	10	7.98185	8.35953	n. def.	n. def.	Q8BK67;A2AWQ2	Q8BK67	Protein RCC2	Rcc2
4.55964	5.39491						1	1	1	1.8	1.8	1.8	53.998	0.009009	6828900	2	1	1	1	1	5.93986	6.77512	n. def.	n. def.	Q8BKZ9	Q8BKZ9	Pyruvate dehydrogenase protein X component, mitochondrial	Pdhx
n. def.	5.05691						1	1	1	4.2	4.2	4.2	65.214	0.009622	3534100	2	0	1	0	1	n. def.	6.54828	n. def.	n. def.	Q8BLH7	Q8BLH7	HIRA-interacting protein 3	Hirip3
4.84368	5.54784						3	3	3	7.3	7.3	7.3	67.941	0	14799000	3	2	2	2	2	6.38775	7.09191	n. def.	n. def.	Q8BMF4;Q99LL2	Q8BMF4	Dihydrolipoyllysine-residue acetyltransferase component of pyruvate dehydrogenase complex, mitochondrial	Dlat
5.36271	5.55748						4	4	4	12.5	12.5	12.5	63.691	0	20111000	6	2	3	2	3	6.89419	7.08895	n. def.	n. def.	Q8BMK4	Q8BMK4	Cytoskeleton-associated protein 4	Ckap4
n. def.	5.57787						1	1	1	4.2	4.2	4.2	56.59	0	8323200	1	0	1	0	1	n. def.	6.92029	n. def.	n. def.	Q8BNE1-3;Q8BNE1-2;Q8BNE1	Q8BNE1-3;Q8BNE1-2;Q8BNE1	Protein FAM115A	Fam115a
n. def.	5.70614	+					1	1	1	6.1	6.1	6.1	33.326	1	8641500	1	0	1	0	1	n. def.	6.93659	339	17	Q8BNX1	Q8BNX1	C-type lectin domain family 4 member G	Clec4g
n. def.	5.78591						3	3	3	5.4	5.4	5.4	64.279	0	14049000	4	1	3	1	3	n. def.	7.14765	n. def.	n. def.	Q8BP47	Q8BP47	Asparagine--tRNA ligase, cytoplasmic	Nars
n. def.	5.61292						4	4	4	7.9	7.9	7.9	70.299	0	13124000	4	1	3	1	3	n. def.	7.11807	n. def.	n. def.	Q99JX7;Q8BP60;V9GXF3;V9GXM5;V9GXW3	Q99JX7;Q8BP60;V9GXF3	Nuclear RNA export factor 1	Nxf1
6.79366	6.56109				OLIG2		6	5	5	10.4	9.1	9.1	104.32	0	276030000	11	4	6	3	5	8.24082	8.00826	n. def.	n. def.	Q8BP69;Q9QX96;Q8CHG2	Q8BP69;Q9QX96;Q8CHG2	Sal-like protein 2	Sall2
n. def.	6.92674	+					1	1	1	3.7	3.7	3.7	52.982	1	228090000	1	0	1	0	1	n. def.	8.35811	437	428	Q8BP77	Q8BP77		Dsp
6.15491	n. def.	+					1	1	1	8.9	8.9	8.9	17.688	1	12858000	1	1	0	1	0	7.10917	n. def.	n. def.	n. def.	Q8BQ49	Q8BQ49		Hoxa3
n. def.	n. def.	+			TCF4		1	1	1	12	12	12	11.319	1	0	1	1	0	1	0	n. def.	n. def.	342	94	Q8BQE8	Q8BQE8		Ep400
n. def.	6.36192						2	2	2	14.4	14.4	14.4	25.153	0.0032258	29913000	3	0	2	0	2	n. def.	7.47586	n. def.	n. def.	Q8BRQ6;Q91WN1	Q8BRQ6;Q91WN1	DnaJ homolog subfamily C member 9	Dnajc9
n. def.	n. def.	+					1	1	1	2.6	2.6	2.6	52.734	1	0	1	1	0	1	0	n. def.	n. def.	343	202	Q8BS95	Q8BS95	Golgi pH regulator	Gpr89a
n. def.	5.1274						1	1	1	3.5	3.5	3.5	66.017	0.0058182	4693200	1	0	1	0	1	n. def.	6.67147	n. def.	n. def.	Q9ERG0-2;Q8CD09;Q8C3R7;Q8BT15;Q9ERG0;Q8C7S2	Q9ERG0-2;Q8CD09;Q8C3R7;Q8BT15;Q9ERG0;Q8C7S2	LIM domain and actin-binding protein 1	Lima1
n. def.	6.27655						4	4	3	10.5	10.5	8.8	59.584	0	43479000	6	0	4	0	3	n. def.	7.63828	n. def.	n. def.	Q8BT60;Q3UJS6;V9GX86;B7ZCP8;V9GWY2;B7ZCP7;B7ZCP6;B7ZCP5;E9Q806;Q3U893	Q8BT60;Q3UJS6	Copine-3	Cpne3
n. def.	5.75171						3	3	3	7.6	7.6	7.6	51.056	0	10727000	2	1	3	1	3	n. def.	7.03048	n. def.	n. def.	Q8BTV2-2;Q8BTV2;Q8BTV2-3	Q8BTV2-2;Q8BTV2	Cleavage and polyadenylation specificity factor subunit 7	Cpsf7
n. def.	5.90244						3	3	3	5.5	5.5	5.5	112.62	0	44733000	4	0	3	0	3	n. def.	7.65063	n. def.	n. def.	Q8BTX6;Q9CZU3;Q8BVI7;Q91YT4;Q8BVK1;Q6ZQK1	Q8BTX6;Q9CZU3;Q8BVI7;Q91YT4	Superkiller viralicidic activity 2-like 2	Skiv2l2
n. def.	n. def.	+					1	1	1	15.2	15.2	15.2	9.0854	1	0	1	0	1	0	1	n. def.	n. def.	n. def.	n. def.	Q8BTY0	Q8BTY0		Acad9
5.0086	5.82221						5	5	5	6.5	6.5	6.5	144.27	0	46730000	6	1	4	1	4	6.79394	7.60754	n. def.	n. def.	Q8BU30	Q8BU30	Isoleucine--tRNA ligase, cytoplasmic	Iars
n. def.	5.19783						1	1	1	1.7	1.7	1.7	71.593	0.0053722	4573400	1	0	1	0	1	n. def.	6.66024	n. def.	n. def.	Q8BUI3	Q8BUI3	Leucine-rich repeat and WD repeat-containing protein 1	LRWD1
n. def.	5.66837						2	2	2	7.4	7.4	7.4	56.472	0	10717000	2	0	2	0	2	n. def.	7.03007	n. def.	n. def.	Q8BW35;Q9R0H0-2;Q9R0H0;A2A848;Q8C168	Q8BW35;Q9R0H0-2;Q9R0H0;A2A848;Q8C168	Peroxisomal acyl-coenzyme A oxidase 1;Acyl-coenzyme A oxidase	Acox1
n. def.	5.04419				OLIG2		1	1	1	4.5	4.5	4.5	40.61	0.00089686	1992700	2	0	1	0	1	n. def.	6.29944	n. def.	n. def.	Q8BXX1;Q9DCM7	Q8BXX1;Q9DCM7	Nucleus accumbens-associated protein 2	Nacc2
n. def.	5.47862	+					1	1	1	12.5	12.5	12.5	14.846	1	2408400	0	0	1	0	1	n. def.	6.38173	351	125	Q8BZK6	Q8BZK6		Gm10033
n. def.	6.17076						3	3	3	12.2	12.2	12.2	39.124	0	29635000	5	0	3	0	3	n. def.	7.4718	n. def.	n. def.	Q8C0E2;Q8C0E2-2	Q8C0E2	Vacuolar protein sorting-associated protein 26B	Vps26b
n. def.	n. def.						1	1	1	2.6	2.6	2.6	35.581	0.0059084	0	1	1	0	1	0	n. def.	n. def.	n. def.	n. def.	Q8C120-3;Q8C120-2;Q8C120	Q8C120-3;Q8C120-2;Q8C120	SH3 domain-containing RING finger protein 3	Sh3rf3
6.02379	6.28024						2	2	2	28.4	28.4	28.4	8.88	0	14814000	6	2	1	2	1	6.72274	6.97921	n. def.	n. def.	Q8C1L7;Q9CQR2	Q8C1L7;Q9CQR2	40S ribosomal protein S21	Rps21
n. def.	6.43794				OLIG2		1	1	1	14.1	14.1	14.1	10.489	0	13706000	2	0	1	0	1	n. def.	7.13691	n. def.	n. def.	Q8C2B8;Q91VN1	Q8C2B8;Q91VN1	Zinc finger protein 24	Zfp191;Znf24
n. def.	5.63603	+					1	1	1	3	3	3	69.434	1	11246000	0	0	1	0	1	n. def.	7.051	352	304	Q8C547-4;Q8C547	Q8C547-4;Q8C547	HEAT repeat-containing protein 5B	Heatr5b
n. def.	5.96037						3	3	3	12.3	12.3	12.3	37.636	0	10041000	3	0	3	0	3	n. def.	7.00178	n. def.	n. def.	Q8CBU3;Q8C570;A2ASC6;Q6PAS9	Q8CBU3;Q8C570;A2ASC6;Q6PAS9	mRNA export factor	Rae1
5.30159	6.49088						5	5	1	10.5	10.5	2.3	61.733	0	82421000	7	3	3	1	0	6.69953	7.88883	n. def.	n. def.	Q8C854-3;Q8C854;G8JL68;A2ATP5;A2ATP6;Q8C854-1;Q8C854-2;F6XJA1	Q8C854-3;Q8C854;G8JL68;A2ATP5;A2ATP6;Q8C854-1;Q8C854-2	Myelin expression factor 2	Myef2
4.2816	5.6902						8	8	8	3.7	3.7	3.7	420.44	0	98770000	9	3	8	3	8	6.56941	7.978	n. def.	n. def.	Q8C8R3-5;Q8C8R3;S4R2R5;Q8C8R3-4;S4R2F3;Q8C8R3-2;Q8C8R3-3;S4R2T7;S4R1J9;G5E8K5-2;A0A1W2P812;S4R1S2;G5E8K5-3;G5E8K2;G5E8K3;G5E8K5;S4R2S8;W6PPA1;S4R2K9;W6PPR4;S4R1U4;S4R1I1;Q8C8R3-8;Q8C8R3-7;Q8C8R3-6;S4R2D6;Q9QXH1;G3X971;S4R1X7;G5E8K5-6;S4R2C1;S4R187;S4R2F5;G3UY11;G5E8K5-5;G5E8K5-4;Q61304;F7D1P5;S4R2J6;S4R165;S4R236;Q02357-5;Q02357-2;G5E8J2;B7ZW98;Q02357;E9QNT8;Q02357-3;G8JL84;D3YTV8;D3Z5M4;Q0VGY9;Q…	Q8C8R3-5;Q8C8R3;S4R2R5;Q8C8R3-4;S4R2F3;Q8C8R3-2;Q8C8R3-3;S4R2T7;S4R1J9	Ankyrin-2	Ank2
n. def.	n. def.	+					1	1	1	3.1	3.1	3.1	67.395	1	0	1	1	0	1	0	n. def.	n. def.	n. def.	n. def.	Q8C9B9-2	Q8C9B9-2	Death-inducer obliterator 1	Dido1
n. def.	n. def.	+					1	1	1	7	7	7	23.898	1	0	1	0	1	0	1	n. def.	n. def.	n. def.	n. def.	Q8CAU1	Q8CAU1		A130051J06Rik
n. def.	n. def.	+					1	1	1	8.9	8.9	8.9	17.601	1	0	1	1	0	1	0	n. def.	n. def.	n. def.	n. def.	Q8CB93	Q8CB93	Protein GAPT	Gapt
n. def.	6.15676						2	2	2	14	14	14	22.663	0	12912000	2	0	2	0	2	n. def.	7.11099	n. def.	n. def.	Q8CBG6;Q9CQ60;D3Z4X1;Q8C6M6;F6X8L5	Q8CBG6;Q9CQ60;D3Z4X1;Q8C6M6;F6X8L5	6-phosphogluconolactonase	Pgls
n. def.	n. def.	+					1	1	1	4.9	4.9	4.9	30.901	1	0	1	1	0	1	0	n. def.	n. def.	363	227	Q8CC70	Q8CC70		9230110C19Rik
n. def.	5.54542						1	1	1	5.5	5.5	5.5	54.739	0	7372900	2	0	1	0	1	n. def.	6.86764	n. def.	n. def.	Q8CCF0-2;Q8CCF0	Q8CCF0-2;Q8CCF0	U4/U6 small nuclear ribonucleoprotein Prp31	Prpf31
6.38485	6.68019						4	2	2	14.2	7.3	7.3	40.092	0.00085985	137070000	7	3	4	1	2	7.66361	7.95895	n. def.	n. def.	Q8CCK0;Q9CTR1;Q8BP16;A0PJB8	Q8CCK0;Q9CTR1;Q8BP16	Core histone macro-H2A.2;Histone H2A	H2afy2
5.40601	5.62431						4	4	4	6.5	6.5	6.5	128.62	0	41895000	8	3	4	3	4	7.19841	7.41671	n. def.	n. def.	Q8R0G9;Q8CDZ5	Q8R0G9;Q8CDZ5	Nuclear pore complex protein Nup133	Nup133
n. def.	5.71158	+					1	1	1	13.5	13.5	13.5	12.147	1	4117900	1	0	1	0	1	n. def.	6.61468	n. def.	n. def.	Q8CF23	Q8CF23		4933427E11Rik
n. def.	5.36388						1	1	1	1.4	1.4	1.4	133.91	0	13637000	1	0	1	0	1	n. def.	7.13472	n. def.	n. def.	Q8CFI7	Q8CFI7	DNA-directed RNA polymerase II subunit RPB2	Polr2b
n. def.	6.10914				OLIG2		5	5	5	6.2	6.2	6.2	116.95	0	64286000	7	1	5	1	5	n. def.	7.80812	n. def.	n. def.	Q8CGY8;Q8CGY8-2;Q8C676;Q3TQV0	Q8CGY8;Q8CGY8-2	UDP-N-acetylglucosamine--peptide N-acetylglucosaminyltransferase 110 kDa subunit	Ogt
n. def.	5.45003						3	3	3	4.1	4.1	4.1	124.74	0	12120000	4	0	3	0	3	n. def.	7.0835	n. def.	n. def.	Q8CH18-3;Q8CH18;Q8CH18-2	Q8CH18-3;Q8CH18	Cell division cycle and apoptosis regulator protein 1	Ccar1
n. def.	6.10027						3	3	3	14	14	14	34.54	0	22675000	3	0	3	0	3	n. def.	7.35555	n. def.	n. def.	Q8CHP8;Q9CVY8;Q3MI13;Q5XK18	Q8CHP8;Q9CVY8	Phosphoglycolate phosphatase	Pgp
n. def.	5.28249						1	1	1	1.8	1.8	1.8	80.085	0.0071073	5557700	1	0	1	0	1	n. def.	6.7449	n. def.	n. def.	Q8CHW4	Q8CHW4	Translation initiation factor eIF-2B subunit epsilon	Eif2b5
n. def.	n. def.	+			TCF4		1	1	1	6	6	6	29.729	1	0	1	1	0	1	0	n. def.	n. def.	n. def.	n. def.	Q8CHY4	Q8CHY4		Phf12
6.08955	6.75311						10	10	10	19.4	19.4	19.4	91.369	0	255030000	15	5	10	5	10	7.65777	8.32131	n. def.	n. def.	Q8JZQ9;Q8CIJ3;A0A0G2JG48	Q8JZQ9;Q8CIJ3	Eukaryotic translation initiation factor 3 subunit B	Eif3b
n. def.	5.20504						2	2	2	4	4	4	108.19	0	8818500	3	0	2	0	2	n. def.	6.94539	n. def.	n. def.	Q8CIM8;Q8CIM8-3;Q8CIM8-2	Q8CIM8;Q8CIM8-3;Q8CIM8-2	Integrator complex subunit 4	Ints4
n. def.	5.33284						1	1	1	3.1	3.1	3.1	57.93	0	5595300	2	0	1	0	1	n. def.	6.74782	n. def.	n. def.	Q8CIN4	Q8CIN4	Serine/threonine-protein kinase PAK 2;PAK-2p27;PAK-2p34	Pak2
n. def.	6.63925						1	1	1	0.6	0.6	0.6	212.05	0.0058224	400890000	1	0	1	0	1	n. def.	8.60303	n. def.	n. def.	Q8CJ27-2;Q8CJ27	Q8CJ27-2;Q8CJ27	Abnormal spindle-like microcephaly-associated protein homolog	Aspm
n. def.	5.11701						3	3	3	6.6	6.6	6.6	60.576	0	4320400	3	0	3	0	3	n. def.	6.63552	n. def.	n. def.	Q8JZM7	Q8JZM7	Parafibromin	Cdc73
4.81761	5.45995						2	2	2	4.2	4.2	4.2	56.775	0.00089366	8497800	2	1	1	1	1	6.1978	6.84016	n. def.	n. def.	Q8K0C4	Q8K0C4	Lanosterol 14-alpha demethylase	Cyp51a1
n. def.	5.19521						1	1	1	6.4	6.4	6.4	58.955	0	4388900	1	0	1	0	1	n. def.	6.64236	n. def.	n. def.	Q8K1N4	Q8K1N4	Spermatogenesis-associated serine-rich protein 2	Spats2
n. def.	5.2774						2	2	2	2.6	2.6	2.6	114.03	0.0053888	9091900	1	0	2	0	2	n. def.	6.95865	n. def.	n. def.	Q9D4G5;Q8K205	Q9D4G5;Q8K205		Pop1
n. def.	5.07232						2	2	2	2.9	2.9	2.9	115.42	0	6378200	3	0	2	0	2	n. def.	6.8047	n. def.	n. def.	Q8K224	Q8K224	N-acetyltransferase 10	Nat10
n. def.	6.37409						1	1	1	18.3	18.3	18.3	14.677	0.0053151	11832000	2	0	1	0	1	n. def.	7.07306	n. def.	n. def.	Q8K273	Q8K273	Membrane magnesium transporter 1	Mmgt1
n. def.	5.27545						2	2	2	4.1	4.1	4.1	71.06	0	5845300	3	0	2	0	2	n. def.	6.76681	n. def.	n. def.	Q8K297	Q8K297	Procollagen galactosyltransferase 1	Colgalt1
n. def.	4.6773						1	1	1	2.3	2.3	2.3	50.185	0	665920	1	0	1	0	1	n. def.	5.82342	n. def.	n. def.	Q8K2A8	Q8K2A8	Dol-P-Man:Man(5)GlcNAc(2)-PP-Dol alpha-1,3-mannosyltransferase	Alg3
n. def.	5.50385						1	1	1	2.1	2.1	2.1	72.585	0.0032103	10528000	1	0	1	0	1	n. def.	7.02235	n. def.	n. def.	Q8K2B3	Q8K2B3	Succinate dehydrogenase [ubiquinone] flavoprotein subunit, mitochondrial	Sdha
5.70857	6.44815						4	4	4	17.7	17.7	17.7	43.131	0	49763000	6	1	4	1	4	6.88467	7.62424	n. def.	n. def.	Q8K2C9	Q8K2C9	Very-long-chain (3R)-3-hydroxyacyl-[acyl-carrier protein] dehydratase 3	ptplad1
5.68032	5.48626						3	3	3	9.5	9.5	9.5	43.485	0	16492000	2	1	2	1	2	7.00255	6.80847	n. def.	n. def.	Q8K2X3;Q3UXU8;Q8CEX6	Q8K2X3;Q3UXU8	CST complex subunit STN1	Obfc1
4.63779	5.16176						2	2	2	2.3	2.3	2.3	155.66	0	13388000	3	1	2	1	2	6.48906	7.01301	n. def.	n. def.	Q8K2Z4;Q8K2Z4-2;A0A0R4J0H7	Q8K2Z4;Q8K2Z4-2;A0A0R4J0H7	Condensin complex subunit 1	Ncapd2
n. def.	5.01961						1	1	1	2.7	2.7	2.7	80.564	0	3975400	2	0	1	0	1	n. def.	6.59938	n. def.	n. def.	Q8K3X4	Q8K3X4	Interferon regulatory factor 2-binding protein-like	Irf2bpl
n. def.	5.42687						1	1	1	3.6	3.6	3.6	45.725	0.0054096	6413300	2	0	1	0	1	n. def.	6.80708	n. def.	n. def.	Q8N7N5-2;Q8N7N5	Q8N7N5-2;Q8N7N5	DDB1- and CUL4-associated factor 8	Dcaf8
5.64279	6.35097						9	9	9	21.5	21.5	21.5	66.612	0	77808000	10	2	7	2	7	7.1052	7.81336	n. def.	n. def.	Q8QZY1	Q8QZY1	Eukaryotic translation initiation factor 3 subunit L	Eif3l
6.05304	6.35856						2	2	2	11.6	11.6	11.6	35.377	0	51198000	6	2	2	2	2	7.22912	7.53466	n. def.	n. def.	Q8R010;Q8R3V2	Q8R010;Q8R3V2	Aminoacyl tRNA synthase complex-interacting multifunctional protein 2	Aimp2
6.25377	6.57918						7	7	7	9.5	9.5	9.5	105.53	0	234720000	17	5	7	5	7	7.87701	8.20243	n. def.	n. def.	Q8R1B4;Q66JU1;P97398	Q8R1B4;Q66JU1	Eukaryotic translation initiation factor 3 subunit C	Eif3c
n. def.	4.70979						1	1	1	4.4	4.4	4.4	40.658	0	922720	0	0	1	0	1	n. def.	5.96507	n. def.	n. def.	Q8R1N0	Q8R1N0	Zinc finger protein 830	Znf830
5.23373	n. def.						1	1	1	6.4	6.4	6.4	34.218	0.006447	1541600	0	1	0	1	0	6.18797	n. def.	n. def.	n. def.	Q8R2E2	Q8R2E2		Vmn1r35
n. def.	5.71182						3	3	3	11.8	11.8	11.8	39.422	0	10815000	4	1	3	1	3	n. def.	7.03403	n. def.	n. def.	Q8R2U0-2;Q8R2U0	Q8R2U0-2;Q8R2U0	Nucleoporin SEH1	Seh1l
n. def.	5.39761						2	2	2	5.4	5.4	5.4	56.311	0.005283	5246100	2	0	2	0	2	n. def.	6.71984	n. def.	n. def.	Q8R2W6;Q8CGC6	Q8R2W6;Q8CGC6	RNA-binding protein 28	Rbm28
n. def.	5.93877	+					1	1	1	2.7	2.7	2.7	79.573	1	25187000	1	0	1	0	1	n. def.	7.40118	370	559	Q8R322	Q8R322	Nucleoporin GLE1	Gle1
n. def.	5.38805						2	2	2	7.1	7.1	7.1	59.513	0.0064795	8308500	2	0	2	0	2	n. def.	6.91952	n. def.	n. def.	Q8R3Y8-2;Q8R3Y8	Q8R3Y8-2;Q8R3Y8	Interferon regulatory factor 2-binding protein 1	Irf2bp1
n. def.	4.68813						1	1	1	2.9	2.9	2.9	74.775	0	1511800	1	0	1	0	1	n. def.	6.17949	n. def.	n. def.	Q8R480	Q8R480	Nuclear pore complex protein Nup85	Nup85
4.85807	5.09223						1	1	1	7.9	7.9	7.9	21.715	0	1566300	3	1	1	1	1	5.76116	5.99533	371	10	Q8R4A7	Q8R4A7		Eral1
5.51041	n. def.						1	1	1	7.2	7.2	7.2	31.025	0.0071023	4210700	1	1	0	1	0	6.62435	n. def.	n. def.	n. def.	Q8R5L1	Q8R5L1		C1qbp
n. def.	5.57871						2	2	2	7.1	7.1	7.1	75.409	0	9855600	2	0	2	0	2	n. def.	6.99368	n. def.	n. def.	Q8VCB1;J3QPB5	Q8VCB1;J3QPB5	Nucleoporin NDC1	Ndc1;Tmem48
6.64739	n. def.	+					1	1	1	4.7	4.7	4.7	48.921	1	97683000	1	1	0	1	0	7.98982	n. def.	372	143	Q8VCW2	Q8VCW2	Keratin, type I cytoskeletal 25	Krt25
n. def.	5.64034						3	3	3	6.5	6.5	6.5	69.085	0	10922000	3	0	3	0	3	n. def.	7.0383	n. def.	n. def.	Q8VCZ7	Q8VCZ7	Zinc finger and BTB domain-containing protein 7C	Zbtb7c
5.16444	6.17765						9	9	9	11.5	11.5	11.5	115.2	0	100740000	11	2	8	2	8	6.94978	7.96298	n. def.	n. def.	Q8VD75;A0A0J9YUA3;Q8C303;A0A1D5RMM7;A0A0J9YUX9;A0A0J9YV08	Q8VD75;A0A0J9YUA3	Huntingtin-interacting protein 1	Hip1
5.9298	6.61081						23	23	16	16.6	16.6	12.2	226.37	0	512940000	45	12	22	7	16	7.94684	8.62784	n. def.	n. def.	Q8VDD5;Q8BIE2;Q811J9;Q3UFT0;Q99JJ3;Q7TQJ6;Q8BIM8;Q14B05;F2Z494;Q6PB65;Q4KMN4	Q8VDD5	Myosin-9	Myh9
5.27497	6.67628						10	10	10	17.1	17.1	17.1	87.555	0	217090000	16	3	10	3	10	6.91841	8.31973	n. def.	n. def.	Q8VDF2-2;Q8VDF2;E9Q5Y5	Q8VDF2-2;Q8VDF2	E3 ubiquitin-protein ligase UHRF1	Uhrf1
5.60175	6.27517						4	4	4	8.6	8.6	8.6	85.045	0	75375000	7	3	4	3	4	7.12024	7.79369	n. def.	n. def.	Q8VDM6-2;Q8VDM6;Q8VDM6-3	Q8VDM6-2;Q8VDM6	Heterogeneous nuclear ribonucleoprotein U-like protein 1	Hnrnpul1
n. def.	5.77231						3	3	3	5.1	5.1	5.1	103	0	29599000	3	0	3	0	3	n. def.	7.47128	n. def.	n. def.	Q8VDP4	Q8VDP4	DBIRD complex subunit KIAA1967 homolog
n. def.	6.02674						2	2	2	6.6	6.6	6.6	70.095	0	30842000	3	0	2	0	2	n. def.	7.48914	n. def.	n. def.	Q8VEH5	Q8VEH5	EPM2A-interacting protein 1	Epm2aip1
n. def.	6.81985						1	1	1	8.5	8.5	8.5	9.166	0.0090028	19814000	1	0	1	0	1	n. def.	7.29697	n. def.	n. def.	Q8VI12;Q91X60	Q8VI12;Q91X60	Neuronal acetylcholine receptor subunit alpha-2	Chrna2
n. def.	4.80396						1	1	1	1.5	1.5	1.5	117.78	0.00085106	2547000	1	0	1	0	1	n. def.	6.40603	n. def.	n. def.	Q8VIG1	Q8VIG1	RE1-silencing transcription factor	Rest
6.70881	7.25883						16	16	15	32.8	32.8	31.6	75.441	0	697880000	26	7	15	7	14	8.18594	8.73595	n. def.	n. def.	Q8VIJ6;Q3TZL2;Q9Z1Q0;Q810V5;Q7TMH7	Q8VIJ6;Q3TZL2	Splicing factor, proline- and glutamine-rich	Sfpq
5.37365	5.11002						2	2	2	18.6	18.6	18.6	19.318	0	3287000	2	1	1	1	1	6.32789	6.06427	n. def.	n. def.	Q9D096;Q91V64	Q9D096;Q91V64	Isochorismatase domain-containing protein 1	Isoc1
6.32672	7.15207						9	8	8	20.9	17	17	46.839	0	375230000	16	5	8	4	7	7.68846	8.51379	n. def.	n. def.	Q91VC3;A0A0N4SVP8;E9PV04;A2AFK7;A0A0N4SVM5;D6RJ60;D6RJ11	Q91VC3;A0A0N4SVP8;E9PV04;A2AFK7	Eukaryotic initiation factor 4A-III;Eukaryotic initiation factor 4A-III, N-terminally processed	Eif4a3;Gm8994
5.80346	6.33945						3	3	3	18.6	18.6	18.6	30.645	0	47957000	6	1	3	1	3	7.03391	7.5699	n. def.	n. def.	Q91VE6-2;Q91VE6;Q8BMY3	Q91VE6-2;Q91VE6	MKI67 FHA domain-interacting nucleolar phosphoprotein	Mki67ip
6.32609	6.33363						3	3	3	20.4	20.4	20.4	22.342	0	38472000	6	3	2	3	2	7.28033	7.28787	n. def.	n. def.	Q91VG6;Q9CRB9;S4R238;Q9D9P1;D3Z0L4;F6QFL0	Q91VG6;Q9CRB9;S4R238;Q9D9P1;D3Z0L4	Coiled-coil-helix-coiled-coil-helix domain-containing protein 3, mitochondrial	Chchd3
6.79595	7.11381						8	8	8	22.7	22.7	22.7	42.161	0	481170000	17	4	7	4	7	8.19388	8.51175	n. def.	n. def.	Q91VM5;Q9WV02;Q9WV02-2;A2AFI3;A2AFI4;S4R1F6	Q91VM5;Q9WV02;Q9WV02-2;A2AFI3;A2AFI4	RNA binding motif protein, X-linked-like-1;RNA-binding motif protein, X chromosome;RNA-binding motif protein, X chromosome, N-terminally processed	Rbmxl1;Rbmx
5.68118	6.67071						10	10	10	20.3	20.3	20.3	82.612	0	196270000	17	3	10	3	10	7.26098	8.25049	n. def.	n. def.	Q922B8;Q91VR5;Q3V1Z7	Q922B8;Q91VR5;Q3V1Z7	ATP-dependent RNA helicase DDX1	Ddx1
n. def.	n. def.						1	1	1	1.8	1.8	1.8	61.405	0.0083916	0	1	0	1	0	1	n. def.	n. def.	n. def.	n. def.	Q91XU0-2;Q91XU0	Q91XU0-2;Q91XU0	ATPase WRNIP1	Wrnip1
n. def.	5.56086						3	3	3	11.7	11.7	11.7	40.079	0	7276000	3	0	3	0	3	n. def.	6.86189	n. def.	n. def.	Q91YR1	Q91YR1	Twinfilin-1	Twf1
4.54022	5.6621						5	5	5	6.8	6.8	6.8	106.72	0	27664000	8	1	5	1	5	6.28841	7.41029	n. def.	n. def.	Q91YR7;Q91YR7-2	Q91YR7	Pre-mRNA-processing factor 6	Prpf6
n. def.	5.36523						2	2	2	5.2	5.2	5.2	72.484	0	8347100	4	1	2	1	2	n. def.	6.92154	n. def.	n. def.	Q9Z129;Q91YU1;D3Z6T0;Q9Z129-2;Q3UUK0;Q3UFL0;E9Q3N0	Q9Z129;Q91YU1;D3Z6T0;Q9Z129-2;Q3UUK0;Q3UFL0;E9Q3N0	ATP-dependent DNA helicase Q1	Recql
10.3045	10.1788	+					27	1	1	44.4	2.3	2.3	51.945	1	599330000000	395	25	24	0	1	11.5349	11.4093	n. def.	n. def.	Q91Z05;X5J553;X5J4J1;X5J5T2;X5J5H3;X5J561;X5J565;X5J4W3;X5J4L1;X5J564;X5J4W6;X5J5S4;K7TDT0;P18527;P18528;X5J4T0;K7U6J5;K7U6H3;A2NVW0;X5J521;X5J4U5;K7THE9;K7TRT7;K7TRP7;X5J5L0;X5J5E1;K7U664;K7THF4;K7T9D0;K7U5I4;K7TDA3;K7TD38;K7T935;X5J5E3;X5J4Z5;X5J4N5;K7U5H8;K7TGZ2;K7TD05;X5J4F5;K7TR59;K7TGW8;K7TGW3;K7TGQ7;K7TD63;K7TD11;K7T999;X5J4P5;X5J4F1;K7U634;K7TRQ8;K7TRG8;K7TRF6;K7TRB1;K7TH81;K7TGY7;K7TGS1;…	Q91Z05		Ighg
5.82159	6.83329						7	7	7	25.2	25.2	25.2	57.488	0	142030000	13	2	7	2	7	7.10034	8.11203	n. def.	n. def.	Q91Z31;Q91Z31-2;A0A0G2JGW0;Q3V328;A0A0G2JFV8	Q91Z31;Q91Z31-2;A0A0G2JGW0	Polypyrimidine tract-binding protein 2	Ptbp2
5.97869	6.61784				OLIG2		15	15	15	16.6	16.6	16.6	121.63	0	280510000	29	8	13	8	13	7.71905	8.3582	n. def.	n. def.	Q91ZW3;Q05DE7;Q6PGB8;Q6PGB8-2;Q3U0F8;F6Z6F4;Q3URV3;B2RT32	Q91ZW3	SWI/SNF-related matrix-associated actin-dependent regulator of chromatin subfamily A member 5	Smarca5
6.02222	5.97186						2	2	2	5.8	5.8	5.8	52.322	0	35816000	4	2	2	2	2	7.27752	7.22712	n. def.	n. def.	Q920L1	Q920L1	Fatty acid desaturase 1	Fads1
5.89427	6.74087						12	12	12	28.6	28.6	28.6	63.39	0	176130000	18	4	11	4	11	7.34143	8.18803	n. def.	n. def.	Q9CSH0;Q921F4;Q921F4-4;V9GXB6;Q3TBR4;Q3UXJ3	Q9CSH0;Q921F4	Heterogeneous nuclear ribonucleoprotein L-like	Hnrpll;Hnrnpll
5.33997	5.94353						3	3	3	11.8	11.8	11.8	43.953	0	24130000	5	1	3	1	3	6.68239	7.28594	n. def.	n. def.	Q921H8;Q8R343;Q8BLD7;H3BJZ9;H3BKL5;Q3TUU3;Q8VCH0;Q3UKM0;Q3UPU8;H3BJC1;H3BKA1	Q921H8;Q8R343;Q8BLD7;H3BJZ9;H3BKL5;Q3TUU3;Q8VCH0;Q3UKM0;Q3UPU8	3-ketoacyl-CoA thiolase A, peroxisomal;3-ketoacyl-CoA thiolase B, peroxisomal	Acaa1a;Acaa1b
n. def.	6.07493						4	4	3	14.8	14.8	12	36.776	0	22577000	4	0	4	0	3	n. def.	7.35367	n. def.	n. def.	Q921M7;Q9CWE1	Q921M7	Protein FAM49B	Fam49b
n. def.	5.08235						2	2	2	2.5	2.5	2.5	85.938	0	5197800	1	0	2	0	2	n. def.	6.71582	n. def.	n. def.	Q921N6;Q921N6-2;H3BLJ6	Q921N6;Q921N6-2;H3BLJ6	Probable ATP-dependent RNA helicase DDX27	Ddx27
n. def.	5.38782						1	1	1	4.3	4.3	4.3	48.34	0	7327100	2	0	1	0	1	n. def.	6.86493	n. def.	n. def.	Q921S7	Q921S7	39S ribosomal protein L37, mitochondrial	Mrpl37
6.27145	5.63212						4	4	4	14.3	14.3	14.3	66.78	0	75801000	8	4	2	4	2	7.78997	7.15063	n. def.	n. def.	Q921T2;J3QQ40;Q921T2-3;Q921T2-2;D3YXF8;Q3UE61;E9PWW2	Q921T2;J3QQ40;Q921T2-3;Q921T2-2	Torsin-1A-interacting protein 1	Tor1aip1
n. def.	5.41542						1	1	1	9.8	9.8	9.8	21.777	0	2602700	2	0	1	0	1	n. def.	6.41542	n. def.	n. def.	Q921Y2	Q921Y2	U3 small nucleolar ribonucleoprotein protein IMP3	Imp3
n. def.	6.57637						4	4	4	15.8	15.8	15.8	56.937	0	109340000	6	0	4	0	4	n. def.	8.03878	n. def.	n. def.	Q922V4;F8WI31;D3Z4V1	Q922V4;F8WI31;D3Z4V1	Pleiotropic regulator 1	Plrg1
n. def.	6.00514						2	2	2	11.8	11.8	11.8	33.572	0	15178000	1	0	2	0	2	n. def.	7.18121	n. def.	n. def.	Q922Y1	Q922Y1	UBX domain-containing protein 1	Ubxn1
5.93791	5.9833						5	5	5	12.9	12.9	12.9	57.428	0	53043000	9	4	3	4	3	7.40031	7.4457	n. def.	n. def.	Q925I1-2;Q925I1;H3BKI6;H3BK90;V9GWS5	Q925I1-2;Q925I1	ATPase family AAA domain-containing protein 3	Atad3
6.44971	6.32899						1	1	1	3.1	3.1	3.1	43.823	0.0071124	118790000	2	1	1	1	1	7.82991	7.70919	n. def.	n. def.	Q99J10	Q99J10	Cytoplasmic tRNA 2-thiolation protein 1	Ctu1
n. def.	5.80352						2	2	2	8.6	8.6	8.6	38.884	0	13358000	3	0	2	0	2	n. def.	7.12574	n. def.	n. def.	Q99J36	Q99J36	THUMP domain-containing protein 1	Thumpd1
6.10195	6.62071				OLIG2		2	1	1	5.1	3	3	42.761	0.0055031	103360000	5	1	2	0	1	7.3807	7.89946	n. def.	n. def.	Q99J95;D6RHP4	Q99J95;D6RHP4	Cyclin-dependent kinase 9	Cdk9
5.36998	6.0561						4	4	4	13.4	13.4	13.4	59.696	0	37051000	8	3	4	3	4	6.80134	7.48745	n. def.	n. def.	Q99JF8;F6RB63;Q05CD2;A2BI12;Q99JF8-2	Q99JF8;F6RB63;Q05CD2;A2BI12;Q99JF8-2	PC4 and SFRS1-interacting protein	Psip1
5.29077	6.6589						8	8	8	22.4	22.4	22.4	45.536	0	123620000	15	2	8	2	8	6.70574	8.07386	n. def.	n. def.	Q99JI4;Q8C1T2	Q99JI4;Q8C1T2	26S proteasome non-ATPase regulatory subunit 6	Psmd6
5.58633	6.39403						5	5	1	23.6	23.6	3.7	46.816	0	57268000	8	2	4	1	0	6.88735	7.69506	n. def.	n. def.	Q99KC3	Q99KC3		Nop2
4.10917	5.08181						2	2	2	3	3	3	87.142	0.00083752	5744500	2	1	2	1	2	5.74265	6.7153	n. def.	n. def.	Q99KC8	Q99KC8	von Willebrand factor A domain-containing protein 5A	Vwa5a
n. def.	6.04387						2	2	2	8.4	8.4	8.4	29.98	0	14382000	5	2	2	2	2	n. def.	7.15782	n. def.	n. def.	Q99KI3	Q99KI3	ER membrane protein complex subunit 3	Emc3
6.5325	7.44905						9	9	9	32.3	32.3	32.3	55.238	0	599070000	16	4	9	4	9	7.81125	8.7278	n. def.	n. def.	Q99KP6;Q99KP6-2;Q99KP6-3	Q99KP6;Q99KP6-2;Q99KP6-3	Pre-mRNA-processing factor 19	Prpf19
n. def.	n. def.						1	1	1	5.4	5.4	5.4	35.009	0	0	1	0	1	0	1	n. def.	n. def.	n. def.	n. def.	Q99LC5	Q99LC5	Electron transfer flavoprotein subunit alpha, mitochondrial	Etfa
n. def.	6.05526				OLIG2		5	5	5	12	12	12	96.683	0	37477000	6	0	5	0	5	n. def.	7.57376	n. def.	n. def.	Q99LI5	Q99LI5	Zinc finger protein 281	Znf281
n. def.	5.31517						1	1	1	13.4	13.4	13.4	19.655	0	1446400	2	0	1	0	1	n. def.	6.16029	n. def.	n. def.	Q99LW6	Q99LW6	YY1-associated factor 2	Yaf2
4.97487	5.23017						1	1	1	4.3	4.3	4.3	54.65	0.0047356	7399400	0	1	1	1	1	6.42203	6.67731	n. def.	n. def.	Q99M31;Q99M31-2	Q99M31;Q99M31-2	Heat shock 70 kDa protein 14	Hspa14
n. def.	5.2068						3	3	3	3.4	3.4	3.4	99.438	0	6922700	3	1	2	1	2	n. def.	6.84028	n. def.	n. def.	Q99MR6-3;Q99MR6-4;Q99MR6-2;Q99MR6;A0A0G2JG65;A0A0G2JDF8	Q99MR6-3;Q99MR6-4;Q99MR6-2;Q99MR6;A0A0G2JG65;A0A0G2JDF8	Serrate RNA effector molecule homolog	Srrt
6.56302	7.04899						4	4	4	35.8	35.8	35.8	23.407	0	133650000	4	1	4	1	4	7.51726	8.00325	n. def.	n. def.	Q99PT1	Q99PT1	Rho GDP-dissociation inhibitor 1	Arhgdia
5.35434	5.08775						2	2	2	5.1	5.1	5.1	80.425	0	11849000	3	2	1	2	1	6.88582	6.61923	n. def.	n. def.	Q99PU5;D3Z1Z2;D3Z2G8	Q99PU5;D3Z1Z2;D3Z2G8	Long-chain-fatty-acid--CoA ligase ACSBG1	Acsbg1
5.40413	6.15033						16	16	16	9.3	9.3	9.3	273.61	0	211740000	26	6	16	6	16	7.50794	8.25414	n. def.	n. def.	Q99PV0;Q3UNG1;B7ZC27;Q3TI71	Q99PV0	Pre-mRNA-processing-splicing factor 8	Prpf8
n. def.	n. def.						1	1	1	4.1	4.1	4.1	63.574	0.002461	0	2	1	0	1	0	n. def.	n. def.	n. def.	n. def.	Q9CPN8	Q9CPN8	Insulin-like growth factor 2 mRNA-binding protein 3	Igf2bp3
n. def.	5.58687						2	2	2	14.5	14.5	14.5	27.453	0	4635000	2	0	2	0	2	n. def.	6.66605	n. def.	n. def.	Q9CPS7	Q9CPS7	RNA-binding protein PNO1	Pno1
n. def.	6.03262						1	1	1	9	9	9	21.139	0	10780000	2	0	1	0	1	n. def.	7.03262	n. def.	n. def.	Q9CPT5	Q9CPT5	Nucleolar protein 16	Nop16
n. def.	5.67889						1	1	1	6	6	6	24.944	0	5728900	1	0	1	0	1	n. def.	6.75807	n. def.	n. def.	Q9CQ06	Q9CQ06	39S ribosomal protein L24, mitochondrial	Mrpl24
5.4598	6.35011						4	4	4	21.6	21.6	21.6	31.062	0	48025000	5	1	4	1	4	6.73855	7.62888	n. def.	n. def.	Q9CQ65	Q9CQ65	S-methyl-5-thioadenosine phosphorylase	Mtap
5.12307	6.1395				OLIG2		2	2	2	8.3	8.3	8.3	37.623	0	22674000	3	1	2	1	2	6.29916	7.31559	n. def.	n. def.	Q9CQJ4;A0A087WQQ3;O35730-3;A0A087WRE9;O35730-2;O35730;A0A068BFS4	Q9CQJ4;A0A087WQQ3;O35730-3;A0A087WRE9;O35730-2;O35730;A0A068BFS4	E3 ubiquitin-protein ligase RING2;E3 ubiquitin-protein ligase RING1	Rnf2;Ring1
n. def.	5.95396						1	1	1	11.4	11.4	11.4	14.015	0.0054306	6295900	1	0	1	0	1	n. def.	6.79906	n. def.	n. def.	Q9CQM5	Q9CQM5	Thioredoxin domain-containing protein 17	Txndc17
6.3928	6.36175						2	2	2	26	26	26	9.9583	0.0032206	28624000	2	2	1	2	1	7.17097	7.13991	n. def.	n. def.	Q9CQS8;E9PW43	Q9CQS8;E9PW43	Protein transport protein Sec61 subunit beta	Sec61b;Gm10320
7.93957	8.1882						7	7	7	31.8	31.8	31.8	23.564	0	1206300000	20	6	7	6	7	8.63855	8.88717	n. def.	n. def.	Q9CR57;Q9CWK0;Q569Z0;A0A1L1SUF6;Q922F9	Q9CR57;Q9CWK0;Q569Z0	60S ribosomal protein L14	Rpl14
n. def.	6.15017						1	1	1	12.4	12.4	12.4	17.247	0	8478400	1	0	1	0	1	n. def.	6.92831	n. def.	n. def.	Q9CRB2	Q9CRB2	H/ACA ribonucleoprotein complex subunit 2	Nhp2
n. def.	5.50214						1	1	1	5.6	5.6	5.6	32.832	0	6038100	1	0	1	0	1	n. def.	6.7809	n. def.	n. def.	Q9CSZ8;Q9D0Q7	Q9CSZ8;Q9D0Q7	39S ribosomal protein L45, mitochondrial	Mrpl45
n. def.	5.29077						2	2	2	7.9	7.9	7.9	52.572	0	4297300	2	0	2	0	2	n. def.	6.6332	n. def.	n. def.	Q9CT10	Q9CT10	Ran-binding protein 3	Ranbp3
4.45554	6.47088				OLIG2		19	19	19	19.6	19.6	19.6	143.23	0	214970000	22	2	19	2	19	6.31288	8.32822	n. def.	n. def.	Q9CU62;A0JLM6;Q6A0B0;Q7TNG4;S4R179	Q9CU62;A0JLM6	Structural maintenance of chromosomes protein 1A	Smc1a
4.60885	n. def.				OLIG2		1	1	1	0.9	0.9	0.9	154.64	0.0059791	2559700	1	1	0	1	0	6.40819	n. def.	n. def.	n. def.	Q9CU65	Q9CU65	Zinc finger MYM-type protein 2	Zmym2
4.88856	5.52194						3	3	3	5.2	5.2	5.2	64.217	0	14349000	4	1	3	1	3	6.43262	7.06599	n. def.	n. def.	Q9CWJ9;B0LAC5	Q9CWJ9;B0LAC5	Bifunctional purine biosynthesis protein PURH;Phosphoribosylaminoimidazolecarboxamide formyltransferase;IMP cyclohydrolase	Atic
5.03455	5.55413						2	2	2	8.9	8.9	8.9	38.158	0	9796100	3	1	2	1	2	6.35675	6.87635	n. def.	n. def.	Q9CX34;Q9CRG3	Q9CX34;Q9CRG3	Suppressor of G2 allele of SKP1 homolog	Sugt1
6.4911	7.43356						9	9	9	44.9	44.9	44.9	30.53	0	423290000	19	3	9	3	9	7.63723	8.57968	n. def.	n. def.	Q9CX86	Q9CX86	Heterogeneous nuclear ribonucleoprotein A0	Hnrnpa0
n. def.	n. def.						1	1	1	2.5	2.5	2.5	37.804	0.0024917	0	1	0	1	0	1	n. def.	n. def.	n. def.	n. def.	Q9CXA2	Q9CXA2	Trans-L-3-hydroxyproline dehydratase	L3hypdh
6.41276	n. def.	+					1	1	1	5.6	5.6	5.6	38.167	1	43975000	1	1	0	1	0	7.64321	n. def.	374	276	Q9CXR1	Q9CXR1	Dehydrogenase/reductase SDR family member 7	Dhrs7
6.72075	6.74902						7	7	7	33.3	33.3	33.3	27.541	0	152150000	11	5	6	5	6	7.86687	7.89515	n. def.	n. def.	Q9CXS4;Q9CXS4-2	Q9CXS4	Centromere protein V	Cenpv
6.54949	7.09524						6	6	6	27.5	27.5	27.5	26.51	0	207950000	12	3	6	3	6	7.66344	8.20917	n. def.	n. def.	Q9CXW3;A0A0A6YY29	Q9CXW3;A0A0A6YY29	Calcyclin-binding protein	Cacybp
n. def.	6.28303						5	5	5	27.1	27.1	27.1	33.189	0	34538000	7	0	5	0	5	n. def.	7.5383	n. def.	n. def.	Q9DB05;Q9CXX1;P28663	Q9DB05;Q9CXX1	Alpha-soluble NSF attachment protein	Napa
6.61474	6.78475						8	8	8	22.4	22.4	22.4	36.09	0	132730000	15	5	8	5	8	7.72869	7.89869	n. def.	n. def.	Q9CY27;Q9CWN2;G3UWE1;Q52L67;A0A1D5RLH3;Q14C44;Q3TAN8	Q9CY27;Q9CWN2;G3UWE1;Q52L67	Very-long-chain enoyl-CoA reductase	Tecr
n. def.	6.16188						2	2	2	14.8	14.8	14.8	20.862	0	14517000	2	0	2	0	2	n. def.	7.16188	n. def.	n. def.	Q9CY97-2;Q9CY97	Q9CY97-2;Q9CY97	RNA polymerase II subunit A C-terminal domain phosphatase SSU72	Ssu72
n. def.	5.76266						2	2	2	9.7	9.7	9.7	34.28	0	11001000	4	0	2	0	2	n. def.	7.04143	n. def.	n. def.	Q9CYG7-2;Q9CYG7	Q9CYG7-2;Q9CYG7	Mitochondrial import receptor subunit TOM34	Tomm34
n. def.	4.64164						1	1	1	3	3	3	32.151	0.00085616	744890	1	0	1	0	1	n. def.	5.87209	n. def.	n. def.	Q9CZ42-2	Q9CZ42-2
n. def.	n. def.						1	1	1	2.1	2.1	2.1	81.877	0.0064378	0	1	0	1	0	1	n. def.	n. def.	n. def.	n. def.	Q9CZD3	Q9CZD3	Glycine--tRNA ligase	Gars
n. def.	5.43449						2	2	2	10.9	10.9	10.9	31.593	0.0084093	3263400	2	0	2	0	2	n. def.	6.51367	n. def.	n. def.	Q9CZT6	Q9CZT6	Protein CMSS1	Cmss1
n. def.	6.50032						2	2	2	10.6	10.6	10.6	51.736	0	63292000	3	1	2	1	2	n. def.	7.80135	n. def.	n. def.	Q9CZU6;Q9DAM4;Q80X68	Q9CZU6;Q9DAM4;Q80X68	Citrate synthase, mitochondrial;Citrate synthase	Cs;Csl
5.26701	5.9884						5	5	5	9.6	9.6	9.6	80.491	0	37074000	7	3	5	3	5	6.77215	7.49356	n. def.	n. def.	Q9CZW4;E9PUC2;D3Z4I4	Q9CZW4;E9PUC2	Long-chain-fatty-acid--CoA ligase 3	Acsl3
5.88152	6.38059						5	5	5	19.5	19.5	19.5	38.937	0	66430000	6	2	4	2	4	7.20374	7.70281	n. def.	n. def.	Q9D051	Q9D051	Pyruvate dehydrogenase E1 component subunit beta, mitochondrial	Pdhb
4.72337	6.34745						6	6	6	9.8	9.8	9.8	75.673	0	84303000	9	2	6	2	6	6.29157	7.91564	n. def.	n. def.	Q9D0I9;Q3UAZ3;Q3TVC5	Q9D0I9;Q3UAZ3	Arginine--tRNA ligase, cytoplasmic	Rars
n. def.	6.97792						2	2	2	25.8	25.8	25.8	10.35	0	47522000	5	1	2	1	2	n. def.	7.67689	n. def.	n. def.	Q9D0M5;D6RIN4;Q9D6F6;Q80ZS7;P63168	Q9D0M5;D6RIN4;Q9D6F6;Q80ZS7;P63168	Dynein light chain 2, cytoplasmic;Dynein light chain 1, cytoplasmic	Dynll2;Dynll1;BC048507
n. def.	6.26536						1	1	1	9.4	9.4	9.4	14.173	0	14739000	1	0	1	0	1	n. def.	7.16847	n. def.	n. def.	Q9D0T1	Q9D0T1	NHP2-like protein 1;NHP2-like protein 1, N-terminally processed	Nhp2l1
n. def.	6.18684						2	2	2	11.8	11.8	11.8	35.565	0	19988000	4	0	2	0	2	n. def.	7.30077	n. def.	n. def.	Q9D1M0	Q9D1M0	Protein SEC13 homolog	Sec13
n. def.	5.27862						2	2	2	4.5	4.5	4.5	37.35	0	2849000	2	0	2	0	2	n. def.	6.45469	n. def.	n. def.	Q9D1P4;A0A1L1STQ1;A0A1L1SSG7;A0A1L1STZ1;A0A1L1SU22	Q9D1P4;A0A1L1STQ1;A0A1L1SSG7;A0A1L1STZ1;A0A1L1SU22	Cysteine and histidine-rich domain-containing protein 1	Chordc1
7.35409	7.50029						5	5	5	32.5	32.5	32.5	13.293	0	325460000	8	5	3	5	3	8.13226	8.27843	n. def.	n. def.	Q9D1R9;A0A0G2JGY8;A0A0G2JEY6;D3YWC0	Q9D1R9;A0A0G2JGY8;A0A0G2JEY6	60S ribosomal protein L34	Rpl34
6.65167	n. def.	+					1	1	1	3.2	3.2	3.2	80.984	1	130040000	1	1	0	1	0	8.11408	n. def.	375	459	Q9D2D7-3;Q9D2D7-2;Q9D2D7	Q9D2D7-3;Q9D2D7-2;Q9D2D7	Zinc finger protein 687	Znf687
5.48766	6.03479						2	2	2	14.4	14.4	14.4	22.23	0.0032232	15298000	3	1	2	1	2	6.52906	7.07617	n. def.	n. def.	Q9D2G2-2;Q9D2G2	Q9D2G2-2;Q9D2G2	Dihydrolipoyllysine-residue succinyltransferase component of 2-oxoglutarate dehydrogenase complex, mitochondrial	Dlst
4.60157	5.47727						2	2	2	3	3	3	75.199	0	11222000	3	1	2	1	2	6.12008	6.99578	n. def.	n. def.	Q9D2R0	Q9D2R0	Acetoacetyl-CoA synthetase	Aacs
7.52823	n. def.	+					1	1	1	4	4	4	29.13	1	539960000	0	1	0	1	0	8.73236	n. def.	376	44	Q9D423	Q9D423		Larp1b
6.25351	n. def.	+					1	1	1	7.7	7.7	7.7	17.327	1	10756000	1	1	0	1	0	7.03165	n. def.	n. def.	n. def.	Q9D5H7	Q9D5H7		Gm9754
5.91201	5.19565						3	3	3	6.9	6.9	6.9	84.67	0	35047000	6	3	1	3	1	7.46832	6.75196	n. def.	n. def.	Q9D666-5;Q9D666-2;Q9D666-4;Q9D666-3;Q9D666;D3Z5Q2;D3Z3N5;D3YUW9;Q3TSM1;D3Z1X3;F7BX07;F6XYA0	Q9D666-5;Q9D666-2;Q9D666-4;Q9D666-3;Q9D666;D3Z5Q2;D3Z3N5;D3YUW9;Q3TSM1	SUN domain-containing protein 1	Sun1
7.74346	8.13862	+					24	1	1	55	4.5	4.5	49.585	1	3859800000	73	16	23	0	1	9.0445	9.43963	n. def.	n. def.	Q9D6F9	Q9D6F9	Tubulin beta-4A chain	Tubb4a
n. def.	6.25066						3	3	3	18.1	18.1	18.1	30.427	0	30276000	3	0	3	0	3	n. def.	7.4811	n. def.	n. def.	Q9D6T0-2;Q9D6T0;A0A1B0GS52;A0A1B0GSR8;A0A1B0GT07;A0A1B0GS48	Q9D6T0-2;Q9D6T0;A0A1B0GS52;A0A1B0GSR8;A0A1B0GT07	Nitric oxide synthase-interacting protein	Nosip
5.7708	6.48904						8	8	8	19.1	19.1	19.1	64.464	0	113870000	9	4	7	4	7	7.26217	7.9804	n. def.	n. def.	Q9D6Z1;Q3USZ5;Q3UJZ7;F7CHQ7;A2APD7;F6U250;F6V095;F7CHP9;E0CXZ0;F6USW7	Q9D6Z1;Q3USZ5;Q3UJZ7;F7CHQ7	Nucleolar protein 56	Nop56
5.81999	6.38276						3	3	3	24.3	24.3	24.3	18.376	0	18449000	3	1	3	1	3	6.59814	7.16092	n. def.	n. def.	Q9D735	Q9D735	Uncharacterized protein C19orf43 homolog
n. def.	4.95742						1	1	1	3.1	3.1	3.1	59.064	0	2719900	2	1	1	1	1	n. def.	6.43455	n. def.	n. def.	Q9D787	Q9D787	Peptidyl-prolyl cis-trans isomerase-like 2	Ppil2
n. def.	5.78425						1	1	1	6.2	6.2	6.2	24.936	0	8518900	1	0	1	0	1	n. def.	6.93038	n. def.	n. def.	Q9D8B3	Q9D8B3	Charged multivesicular body protein 4b	Chmp4b
n. def.	5.04669						1	1	1	8.7	8.7	8.7	33.304	0.0084448	2115600	1	0	1	0	1	n. def.	6.32543	n. def.	n. def.	Q9DB41-2;Q9DB41	Q9DB41-2;Q9DB41	Mitochondrial glutamate carrier 2	Slc25a18
5.05546	5.47265						1	1	1	3.6	3.6	3.6	47.404	0	8621500	2	1	1	1	1	6.37769	6.79487	n. def.	n. def.	Q9DBE8	Q9DBE8	Alpha-1,3/1,6-mannosyltransferase ALG2	Alg2
n. def.	5.11724						1	1	1	2	2	2	73.988	0.0054012	4191800	1	0	1	0	1	n. def.	6.6224	n. def.	n. def.	Q9DBN5-2;Q9DBN5-3;Q9DBN5	Q9DBN5-2;Q9DBN5-3;Q9DBN5	Lon protease homolog 2, peroxisomal	Lonp2
n. def.	6.25042						7	7	7	9.8	9.8	9.8	108.11	0	81880000	7	0	7	0	7	n. def.	7.91318	n. def.	n. def.	Q9DBR1-2;Q9DBR1	Q9DBR1-2;Q9DBR1	5-3 exoribonuclease 2	Xrn2
n. def.	4.95031						2	2	2	3.7	3.7	3.7	94.475	0	4281100	3	0	2	0	2	n. def.	6.63156	n. def.	n. def.	Q9DBY8	Q9DBY8	Nuclear valosin-containing protein-like	Nvl
5.71414	5.81043						2	2	2	10.8	10.8	10.8	41.241	0	23281000	3	1	2	1	2	7.01515	7.11146	n. def.	n. def.	Q9DCA5;Q8CEX3;F6WEP7	Q9DCA5;Q8CEX3;F6WEP7	Ribosome biogenesis protein BRX1 homolog	Brix1
6.6585	7.11401						9	9	9	24.5	24.5	24.5	47.006	0	351140000	16	4	9	4	9	7.95953	8.41504	n. def.	n. def.	Q9DCL9;D3Z6P1;D6RCU8	Q9DCL9	Multifunctional protein ADE2;Phosphoribosylaminoimidazole-succinocarboxamide synthase;Phosphoribosylaminoimidazole carboxylase	Paics
n. def.	5.84127						2	2	2	11.3	11.3	11.3	37.482	0	11102000	1	0	2	0	2	n. def.	7.0454	n. def.	n. def.	Q9DCZ1;F6VY18	Q9DCZ1;F6VY18	GMP reductase 1	Gmpr
n. def.	5.65858						1	1	1	6.6	6.6	6.6	28.049	0.0089903	5467200	1	0	1	0	1	n. def.	6.73776	n. def.	n. def.	Q9DD20	Q9DD20	Methyltransferase-like protein 7B	Mettl7b
5.74353	5.78155						4	4	4	7.3	7.3	7.3	66.943	0	42873000	5	3	2	3	2	7.31173	7.34974	n. def.	n. def.	Q9EP69	Q9EP69	Phosphatidylinositide phosphatase SAC1	Sacm1l
n. def.	5.75014						3	3	3	8.5	8.5	8.5	64.402	0	12375000	3	0	3	0	3	n. def.	7.09255	n. def.	n. def.	Q9EP97;F6Z9L5	Q9EP97	Sentrin-specific protease 3	Senp3
n. def.	5.88202						3	3	3	3.6	3.6	3.6	119.49	0	32009000	4	0	3	0	3	n. def.	7.50527	n. def.	n. def.	Q9EPL8;A0A140LHD0;Q7TMY7-2;Q7TMY7	Q9EPL8	Importin-7	Ipo7
5.79821	6.24839						8	8	8	10.2	10.2	10.2	122.66	0	136800000	12	5	7	5	7	7.55409	8.00428	n. def.	n. def.	Q9EPU0-2;Q9EPU0	Q9EPU0-2;Q9EPU0	Regulator of nonsense transcripts 1	Upf1
n. def.	5.42382						3	3	3	2.8	2.8	2.8	160.82	0	18574000	3	0	3	0	3	n. def.	7.26891	n. def.	n. def.	Q9EPU4	Q9EPU4	Cleavage and polyadenylation specificity factor subunit 1	Cpsf1
n. def.	n. def.	+					1	1	1	1.5	1.5	1.5	116.41	1	0	1	0	1	0	1	n. def.	n. def.	n. def.	n. def.	Q9EQU3	Q9EQU3	Toll-like receptor 9	Tlr9
n. def.	5.35457						1	1	1	3.8	3.8	3.8	46.325	0	5882100	2	0	1	0	1	n. def.	6.76953	n. def.	n. def.	Q9ER73	Q9ER73	Elongator complex protein 4	Elp4
7.5103	7.92679						12	2	0	25.1	5.1	0	50.418	0	2337400000	42	9	12	0	0	8.81133	9.22781	n. def.	n. def.	Q9ERD7	Q9ERD7	Tubulin beta-3 chain	Tubb3
n. def.	4.97951						4	4	4	2.7	2.7	2.7	341.12	0	16503000	5	0	4	0	4	n. def.	7.21756	n. def.	n. def.	Q9ERU9;Q8BQK6	Q9ERU9;Q8BQK6	E3 SUMO-protein ligase RanBP2;Putative peptidyl-prolyl cis-trans isomerase	Ranbp2
n. def.	5.7268						1	1	1	5.4	5.4	5.4	25.351	0.00085543	6397100	1	0	1	0	1	n. def.	6.80598	n. def.	n. def.	Q9EST4-3;Q9EST4	Q9EST4-3;Q9EST4	Proteasome assembly chaperone 2	Psmg2
5.56692	6.31313						45	45	45	13.2	13.2	13.2	532.04	0	628180000	71	19	40	19	40	7.98022	8.72643	n. def.	n. def.	Q9JHU4;Q80U36;Q8C6T5;Q923F5;Q3UA73;Q3TAZ3;O70182	Q9JHU4	Cytoplasmic dynein 1 heavy chain 1	Dync1h1
5.45298	6.34143						5	5	5	9.7	9.7	9.7	107.06	0	118980000	8	1	5	1	5	7.13421	8.02268	n. def.	n. def.	Q9JIF7	Q9JIF7	Coatomer subunit beta	Copb1
5.48022	5.75221						3	3	3	10.3	10.3	10.3	49.485	0	22551000	4	2	2	2	2	6.8952	7.16717	n. def.	n. def.	Q9JIH2	Q9JIH2	Nuclear pore complex protein Nup50	Nup50
5.502	5.73958						1	1	1	6.4	6.4	6.4	25.826	0.003252	11267000	2	1	1	1	1	6.61594	6.85352	n. def.	n. def.	Q9JIK9	Q9JIK9	28S ribosomal protein S34, mitochondrial	Mrps34
4.94948	5.43645						3	3	3	3.6	3.6	3.6	144.8	0	22456000	5	2	3	2	3	6.74187	7.22884	n. def.	n. def.	Q9JJ28	Q9JJ28	Protein flightless-1 homolog	Flii
n. def.	6.46184						2	2	2	8.2	8.2	8.2	33.275	0	23170000	2	0	2	0	2	n. def.	7.36493	n. def.	n. def.	Q9JJD0	Q9JJD0	THAP domain-containing protein 11	Thap11
n. def.	n. def.						1	1	1	2	2	2	67.556	0	0	1	0	1	0	1	n. def.	n. def.	n. def.	n. def.	Q9JJF3	Q9JJF3	Bifunctional lysine-specific demethylase and histidyl-hydroxylase NO66	No66
n. def.	n. def.	+					1	1	1	6	6	6	15	1	0	1	0	1	0	1	n. def.	n. def.	381	5	Q9JJJ5	Q9JJJ5		Itgae
5.12143	5.00156						1	1	1	3.7	3.7	3.7	45.343	0	6746100	2	1	1	1	1	6.58383	6.46398	n. def.	n. def.	Q9JL35	Q9JL35	High mobility group nucleosome-binding domain-containing protein 5	Hmgn5
n. def.	5.50063						3	3	3	3.7	3.7	3.7	109.62	0	15834000	3	0	3	0	3	n. def.	7.19959	n. def.	n. def.	Q9JLI8;Q9JLI8-2	Q9JLI8	Squamous cell carcinoma antigen recognized by T-cells 3	Sart3
n. def.	5.75862						1	1	1	3.8	3.8	3.8	41.762	0	11472000	1	0	1	0	1	n. def.	7.05964	n. def.	n. def.	Q9JMB0	Q9JMB0	G kinase-anchoring protein 1	Gkap1
5.77617	6.53214						4	4	4	20.8	20.8	20.8	32.442	0	56035000	7	3	3	3	3	6.92229	7.67827	n. def.	n. def.	Q9R1R9;Q9R1R8;Q9QYF1;Q9R1R5	Q9R1R9;Q9R1R8;Q9QYF1;Q9R1R5	Retinol dehydrogenase 11	Rdh11
6.37994	6.87549						2	2	2	12.8	12.8	12.8	21.425	0	99059000	4	2	2	2	2	7.37994	7.8755	n. def.	n. def.	Q9QYS9-5;Q9QYS9-8;Q9QYS9-4;Q9QYS9-3;Q9QYS9-6;Q9QYS9-2;Q9QYS9;Q9QYS9-7	Q9QYS9-5;Q9QYS9-8;Q9QYS9-4;Q9QYS9-3;Q9QYS9-6;Q9QYS9-2;Q9QYS9;Q9QYS9-7	Protein quaking	Qki
7.90006	8.09167						15	2	2	51.9	5.6	5.6	43.6	0	4058900000	56	13	15	2	2	9.2011	9.3927	n. def.	n. def.	Q9QZ83	Q9QZ83		Actg1
6.66014	6.94506						9	9	9	44.6	44.6	44.6	36.46	0	254300000	14	6	6	6	6	7.93889	8.22381	n. def.	n. def.	Q9QZD9;Q3T9Y8;A2AE03;Q8BTM6	Q9QZD9;Q3T9Y8	Eukaryotic translation initiation factor 3 subunit I	Eif3i
5.46483	6.21389						5	5	5	6.9	6.9	6.9	97.512	0	88691000	12	4	5	4	5	7.12759	7.87666	n. def.	n. def.	Q9QZE5;Q9QXK3-3;Q9QXK3-4;Q9QXK3;Q7TNQ1	Q9QZE5	Coatomer subunit gamma-1	Copg1
n. def.	4.56515	+					1	1	1	3.9	3.9	3.9	53.322	1	955270	1	0	1	0	1	n. def.	5.98013	n. def.	n. def.	Q9QZL0	Q9QZL0	Receptor-interacting serine/threonine-protein kinase 3	Ripk3
6.84778	7.01064						10	10	8	36.9	36.9	29.8	39.289	0	276660000	16	9	7	7	5	8.05189	8.21474	n. def.	n. def.	Q9QZQ8-2;Q9QZQ8;Q8CA90;Q9D3U7;Q9D3V6	Q9QZQ8-2;Q9QZQ8;Q8CA90	Core histone macro-H2A.1;Histone H2A	H2afy
n. def.	5.87885						2	2	2	11.9	11.9	11.9	36.135	0	17401000	3	0	2	0	2	n. def.	7.24057	n. def.	n. def.	Q9R1T2-2;Q9R1T2	Q9R1T2-2;Q9R1T2	SUMO-activating enzyme subunit 1;SUMO-activating enzyme subunit 1, N-terminally processed	Sae1
5.51734	6.39754						3	3	3	13.4	13.4	13.4	34.371	0	36749000	5	1	3	1	3	6.63129	7.5115	n. def.	n. def.	Q9WTX2	Q9WTX2	Interferon-inducible double stranded RNA-dependent protein kinase activator A	Prkra
n. def.	5.93719						1	1	1	4.6	4.6	4.6	36.154	0.00084175	11249000	2	0	1	0	1	n. def.	7.05111	n. def.	n. def.	Q9WUM5	Q9WUM5	Succinyl-CoA ligase [ADP/GDP-forming] subunit alpha, mitochondrial	Suclg1
5.81273	5.70865						1	1	1	7.6	7.6	7.6	27.855	0	17415000	3	1	1	1	1	6.98882	6.88474	n. def.	n. def.	Q9WV55	Q9WV55	Vesicle-associated membrane protein-associated protein A	Vapa
5.63661	5.32779						1	1	1	5.5	5.5	5.5	22.395	0.0071225	9041700	1	1	1	1	1	6.78274	6.47392	n. def.	n. def.	Q9WVA4	Q9WVA4	Transgelin-2	Tagln2
n. def.	5.32069						2	2	2	3.1	3.1	3.1	94.529	0	7324000	2	0	2	0	2	n. def.	6.86475	n. def.	n. def.	Q9Z0W3-2;Q9Z0W3	Q9Z0W3-2;Q9Z0W3	Nuclear pore complex protein Nup160	Nup160
n. def.	n. def.	+					1	1	1	3.6	3.6	3.6	61.139	1	0	1	0	1	0	1	n. def.	n. def.	384	182	Q9Z1B8	Q9Z1B8	PHD finger protein 1	Phf1
4.70417	5.85057						5	5	5	6.6	6.6	6.6	170.65	0	59240000	6	1	4	1	4	6.59626	7.74267	n. def.	n. def.	Q9Z277;Q9Z277-2	Q9Z277;Q9Z277-2	Tyrosine-protein kinase BAZ1B	Baz1b
7.39693	7.67296						8	6	6	30.4	23.9	23.9	45.729	0	1080500000	28	7	8	5	6	8.57302	8.84904	n. def.	n. def.	Q9Z2X1;Q9Z2X1-2;Q8R582;J3QMT0;J3QM80;J3QNH2;J3QMV8;J3QP45	Q9Z2X1;Q9Z2X1-2;Q8R582	Heterogeneous nuclear ribonucleoprotein F;Heterogeneous nuclear ribonucleoprotein F, N-terminally processed	Hnrnpf
4.69845	4.74699						3	3	3	5.1	5.1	5.1	90.884	0	4019900	4	2	2	2	2	6.27823	6.32679	n. def.	n. def.	Q9Z315	Q9Z315	U4/U6.U5 tri-snRNP-associated protein 1	Sart1
9.90451	9.91163	+					7	1	1	41.3	18.3	18.3	13.536	1	97111000000	48	7	5	1	0	10.6827	10.6898	n. def.	n. def.	U5JE78	U5JE78
n. def.	6.09499	+					1	1	1	55.6	55.6	55.6	2.0684	1	1244500	0	0	1	0	1	n. def.	6.09499	389	4	V9GWV4;V9GWS2	V9GWV4;V9GWS2
n. def.	n. def.	+					1	1	1	10.5	10.5	10.5	17.896	1	0	1	1	0	1	0	n. def.	n. def.	n. def.	n. def.	Z4YKK6	Z4YKK6
