# Supplementary material for: An efficient and scalable pipeline for epitope tagging in mammalian stem cells using Cas9 ribonucleoprotein
Source: eLife. 2018 Apr 11;7:e35069. doi: 10.7554/eLife.35069 (PMC5947990; doi:10.7554/eLife.35069)
Supplement: Table 1—source data 1. [file elife-35069-table1-data1.xlsx]

## Sheet: Sheet1
	Mouse NS cells (ANS4)
	Tag	Tag size (bp)	Homology Arms (bp)	Knock-in efficiency (%)
	3XFLAG	66	67	21.2
	V5	42	79	17.6
	Myc	30	85	14.9
	HA	27	86	15.8
	Mouse NS cells (BL6)
	Tag	Tag size (bp)	Homology Arms (bp)	Knock-in efficiency (%)
	3XFLAG	66	67	13.7
	V5	42	79	13.9
	Myc	30	85	9
	HA	27	86	14.6
