# Supplementary material for: An efficient and scalable pipeline for epitope tagging in mammalian stem cells using Cas9 ribonucleoprotein
Source: eLife. 2018 Apr 11;7:e35069. doi: 10.7554/eLife.35069 (PMC5947990; doi:10.7554/eLife.35069)
Supplement: Table 2—source data 1. [file elife-35069-table2-data1.xlsx]

## Sheet: Table 2
	Cell type	Gene	Total colonies picked	V5 positive (ICC)	Correctly targeted (PCR)	Bi-allelic (PCR)
	Mouse NS cells	Sox2	89	13	11	4
		Sox3	55	8	6	5
	Mouse GBM-model cells	Sox2	242	14	14	1
		Sox3	96	19	18	5
		Sox8	96	7	6	4
		Sox9	469	46	41	7
		FoxK2	96	2	2	1
